# Supplementary material for: Integrated Analysis of lncRNA–mRNA Regulatory Networks Related to Lipid Metabolism in High-Oleic-Acid Rapeseed
Source: MDPI journal article supplement (doi:10.3390/ijms24076277), 2023-03-27
Supplement: s1 [file s1]

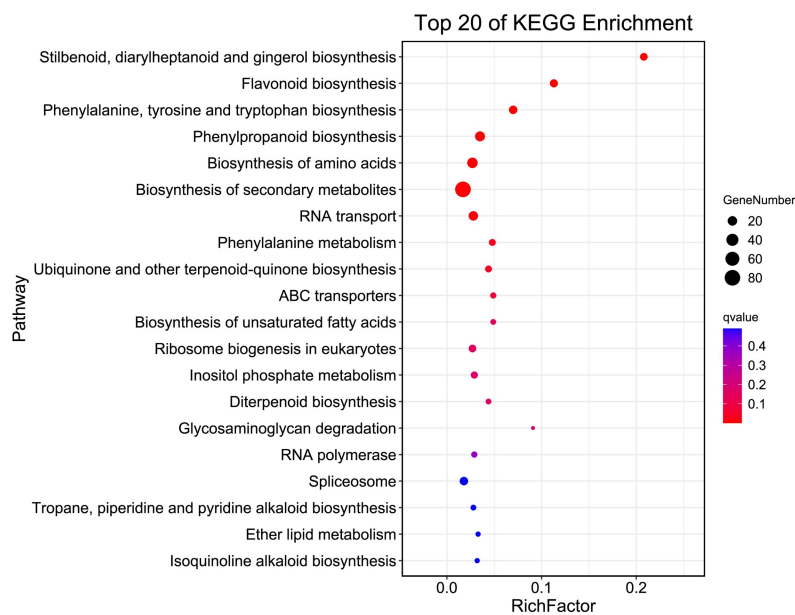

Oil content-paleturquoise model KEGG

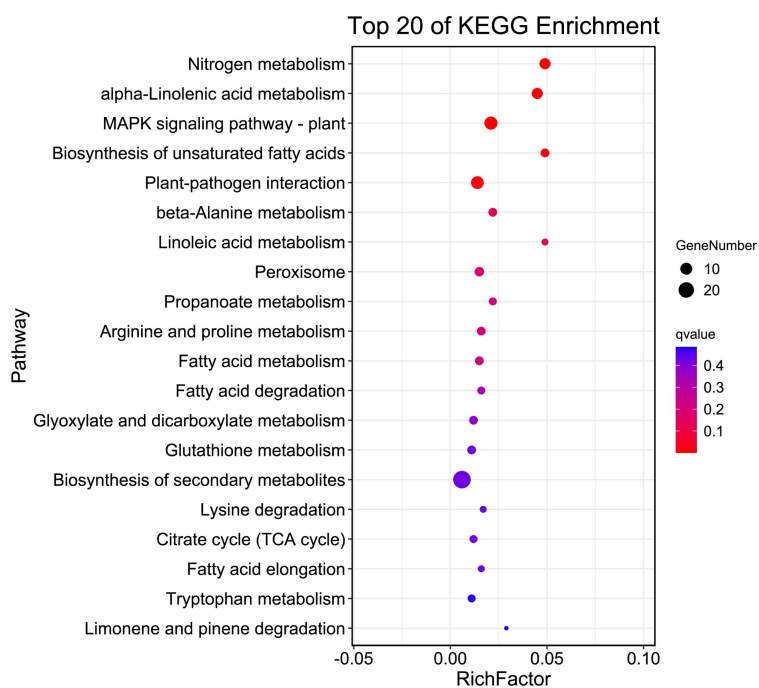

Oil content-lightsteelblue1 model KEGG

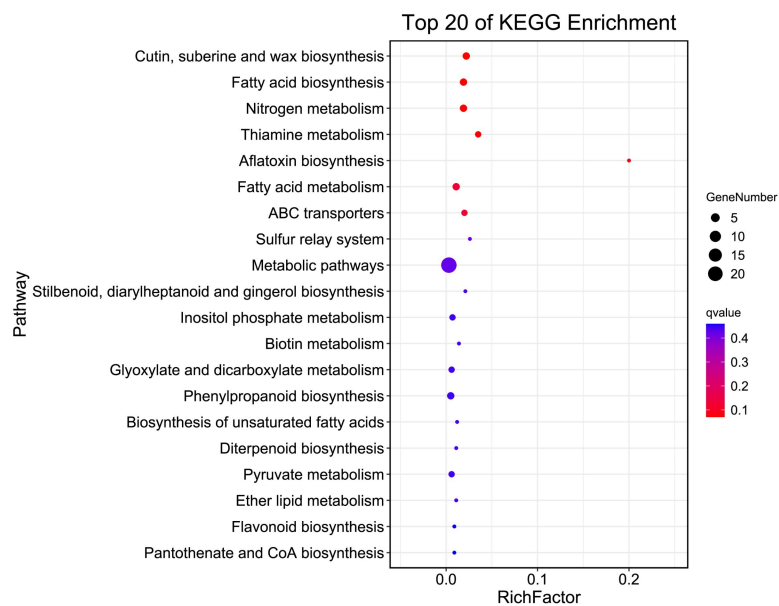

oleic acid, linoleic acid and linolenic acid- blue2 model KEGG

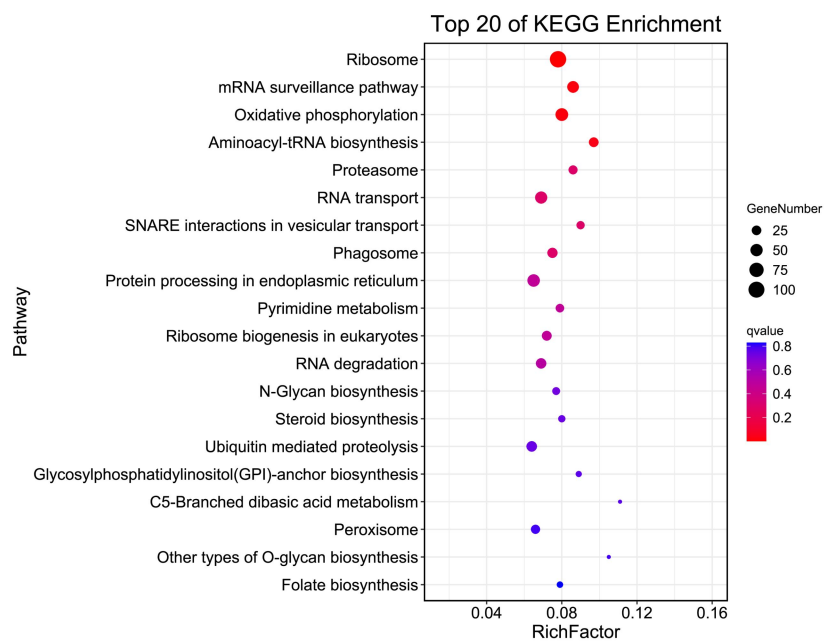

oleic acid, linoleic acid and linolenic acid- ivory model KEGG

Supplementary Figure S6 KEGG analysis of lncRNA and mRNA modules related to oil content, oleic acid, linoleic acid and linolenic acid
