# Supplementary material for: Integrated Analysis of lncRNA–mRNA Regulatory Networks Related to Lipid Metabolism in High-Oleic-Acid Rapeseed
Source: MDPI journal article supplement (doi:10.3390/ijms24076277), 2023-03-27
Supplement: s1 [file s1]

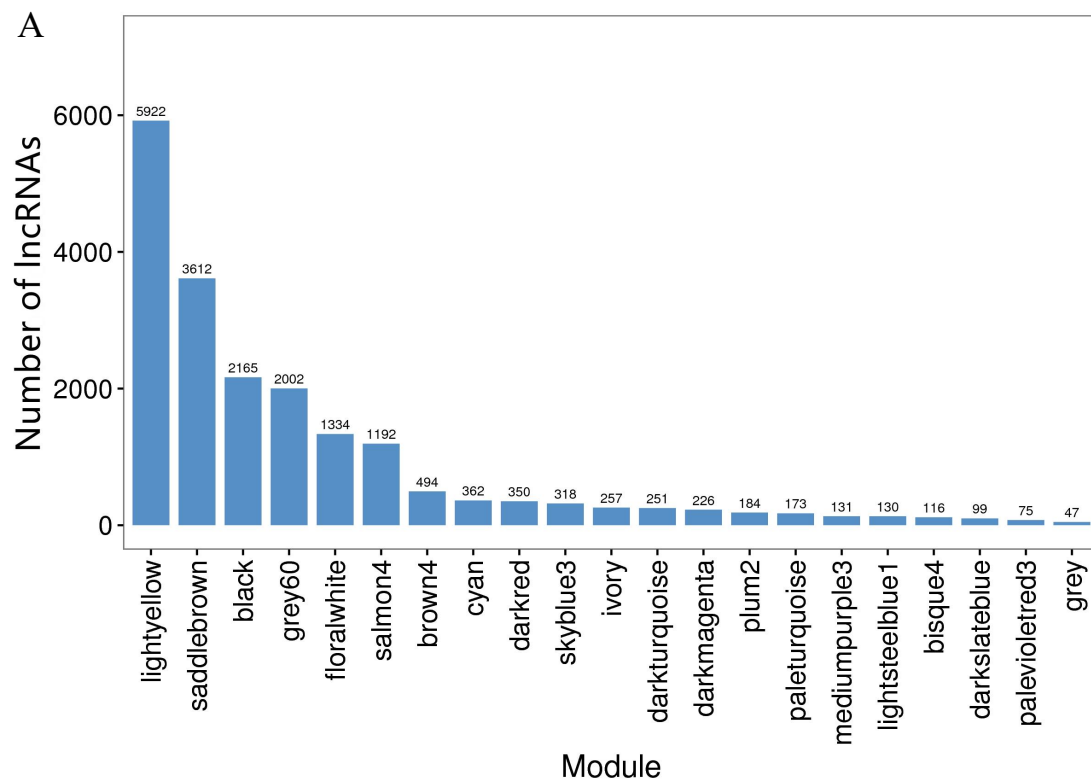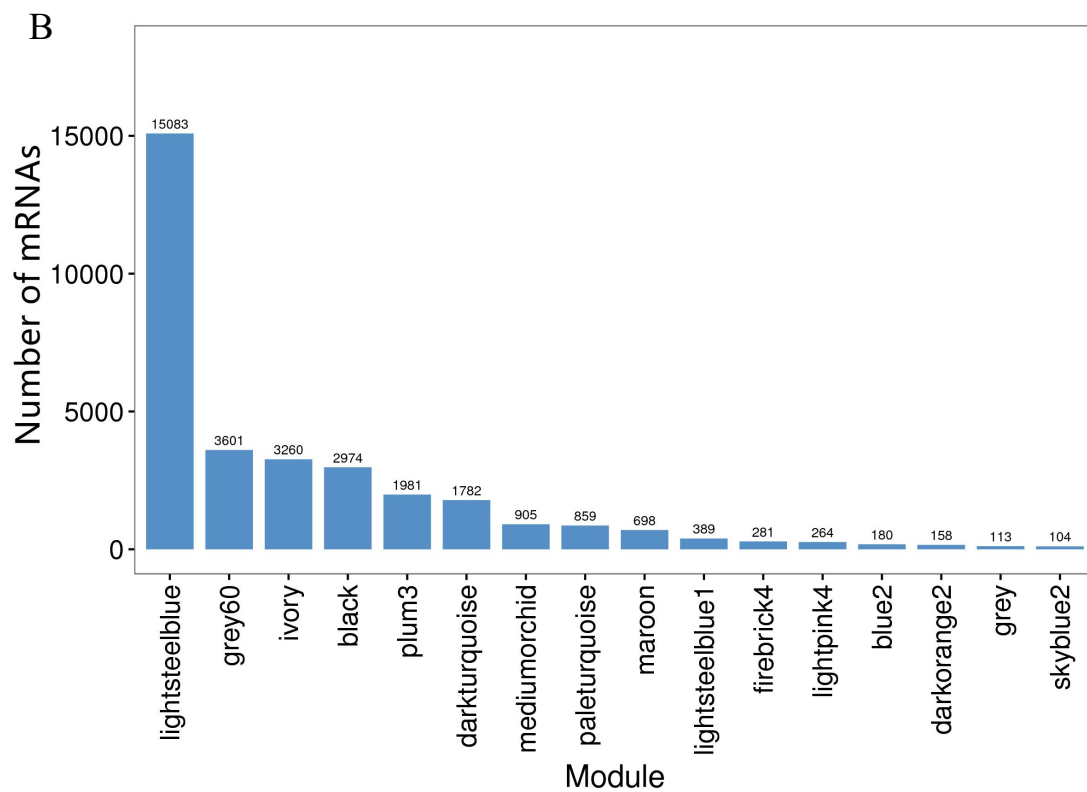

Supplementary Figure S2 Number of lncRNAs and mRNAs in each module. (A) Number of lncRNAs in each module; (B) Number of mRNAs in each module.
