# Supplementary material for: Integrated Analysis of lncRNA–mRNA Regulatory Networks Related to Lipid Metabolism in High-Oleic-Acid Rapeseed
Source: MDPI journal article supplement (doi:10.3390/ijms24076277), 2023-03-27
Supplement: s1 [file s1]

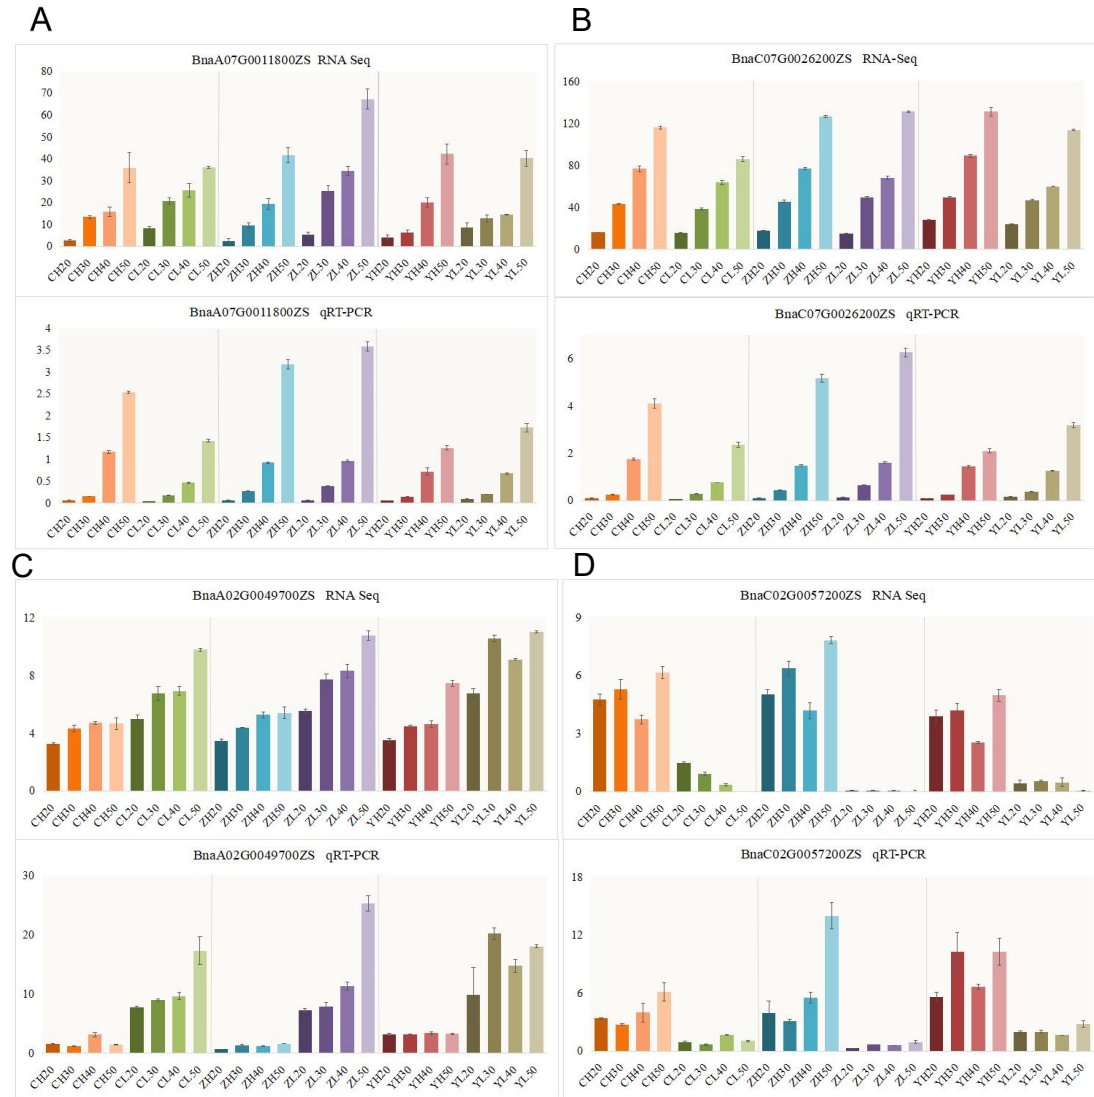

Supplementary Figure S4 Verification of mRNAs in the material- and temporal-related modules.(A) and (B) mRNA in temporal-related modules; (C) and (D) mRNA in material-related modules
