# Supplementary material for: Integrated Analysis of lncRNA–mRNA Regulatory Networks Related to Lipid Metabolism in High-Oleic-Acid Rapeseed
Source: MDPI journal article supplement (doi:10.3390/ijms24076277), 2023-03-27
Supplement: s1 [file s1]

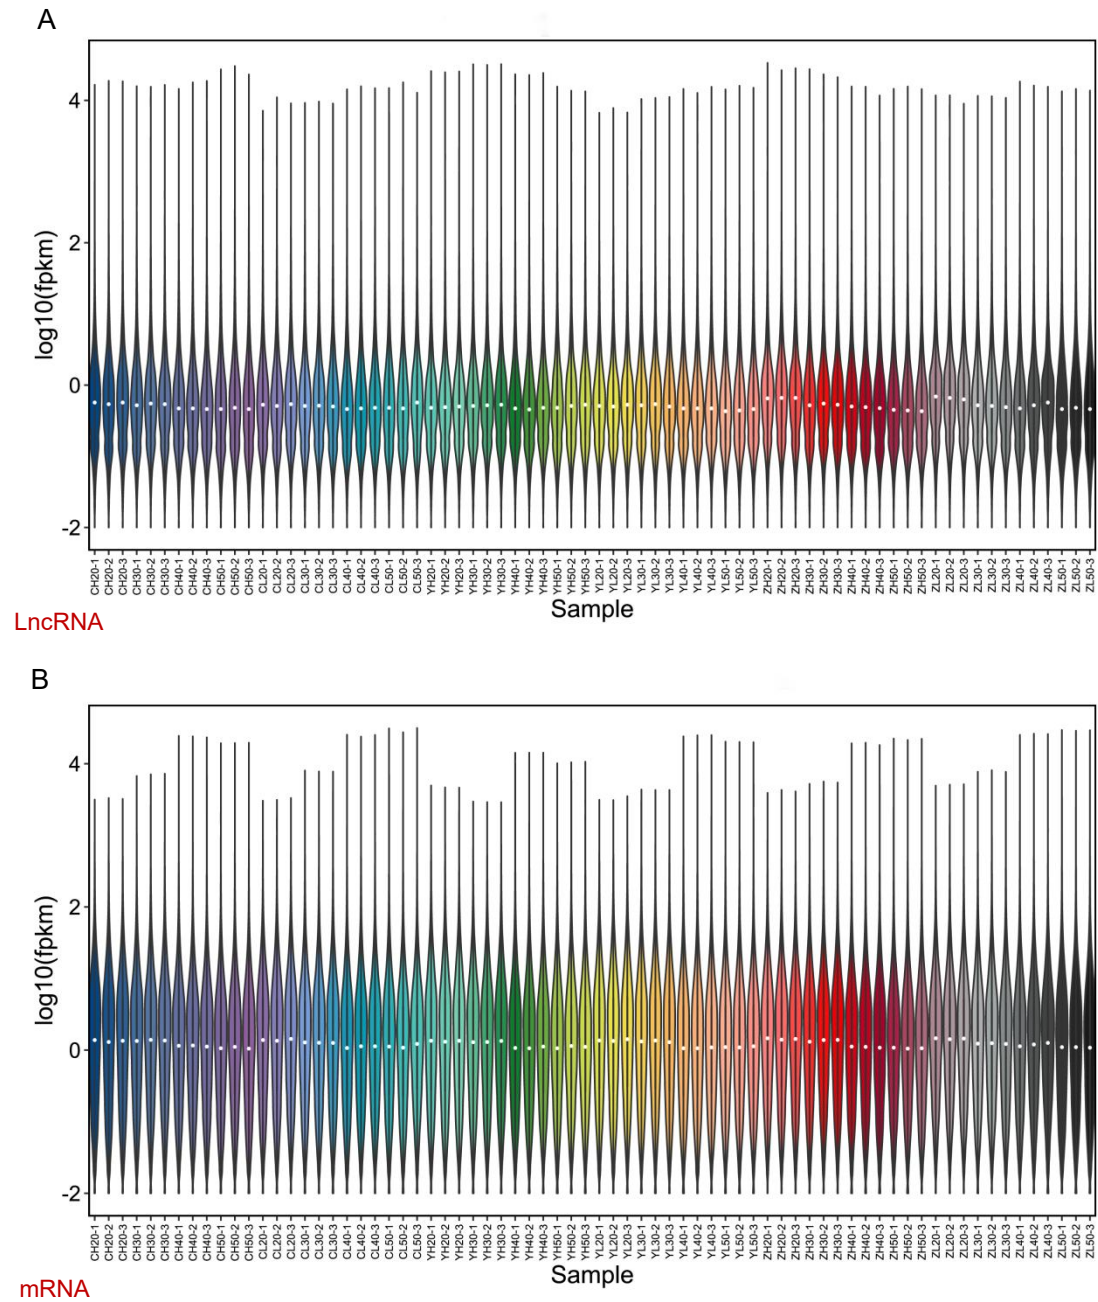

Supplementary Figure S1 Violin plots of the expression of several lncRNAs and mRNAs in the samples under study. (A) violin plots of the expression of several lncRNAs and (B) violin plots of the expression of several mRNAs.
