# Supplementary material for: Integrated Analysis of lncRNA–mRNA Regulatory Networks Related to Lipid Metabolism in High-Oleic-Acid Rapeseed
Source: MDPI journal article supplement (doi:10.3390/ijms24076277), 2023-03-27
Supplement: s1 [file s1]

mRNA

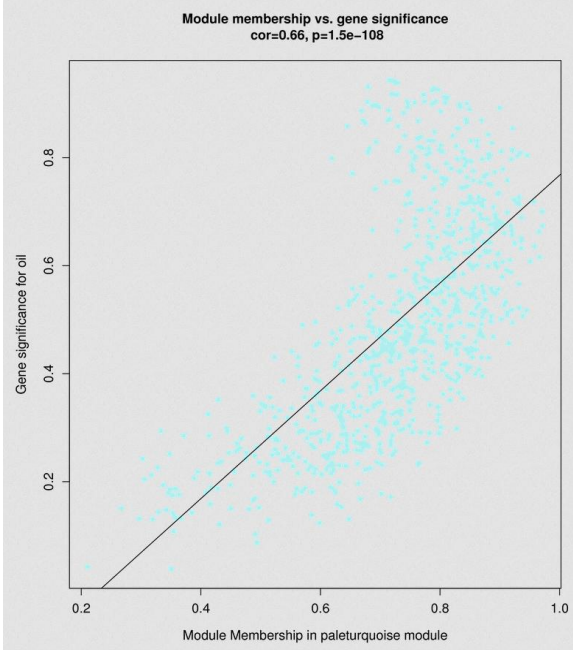

Oil

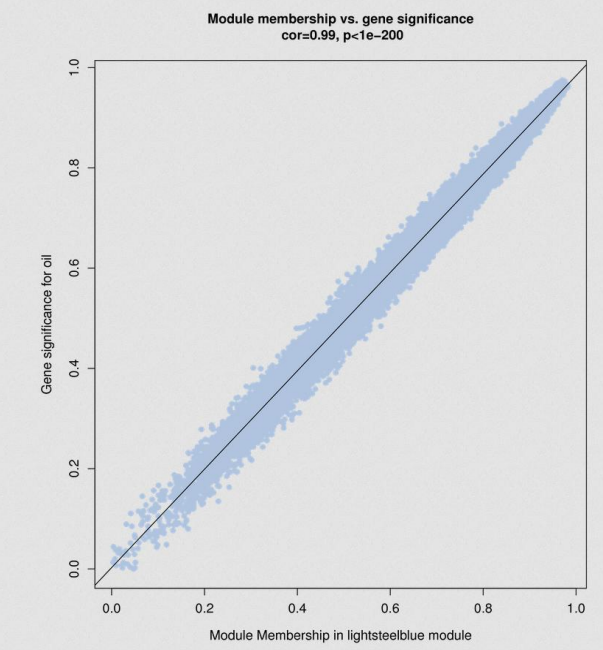

Oleic acid

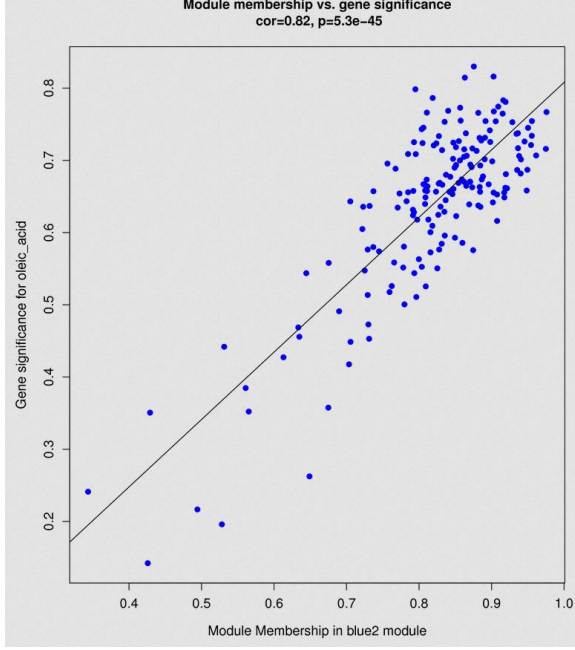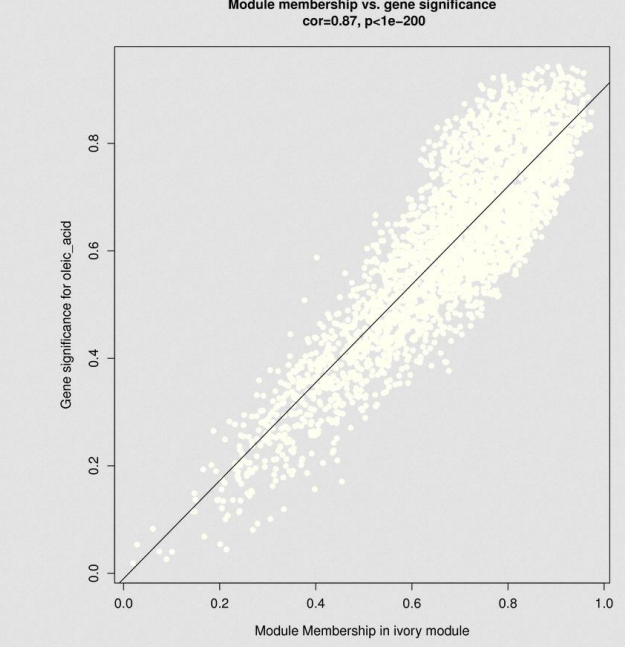

Linoleic acid

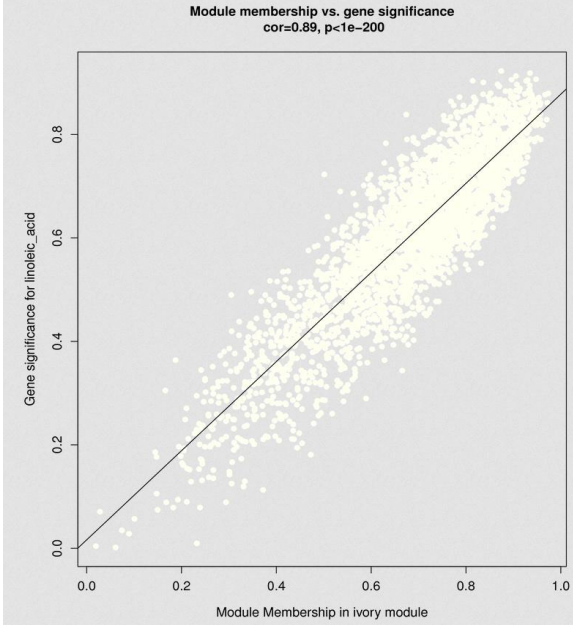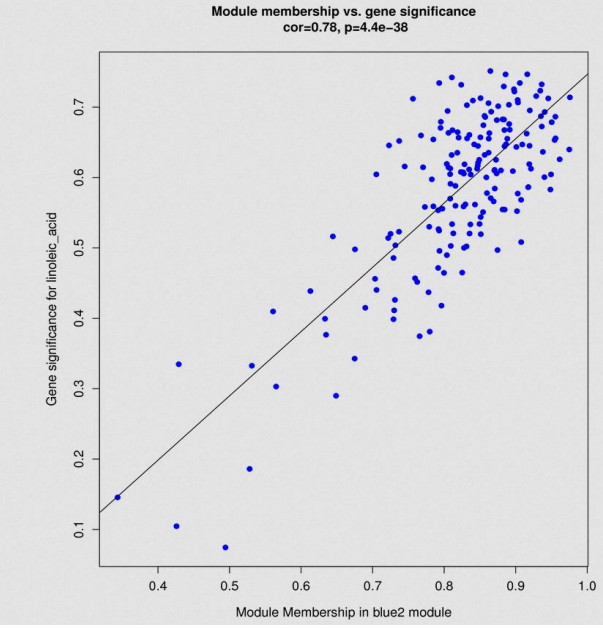

Linolenic acid

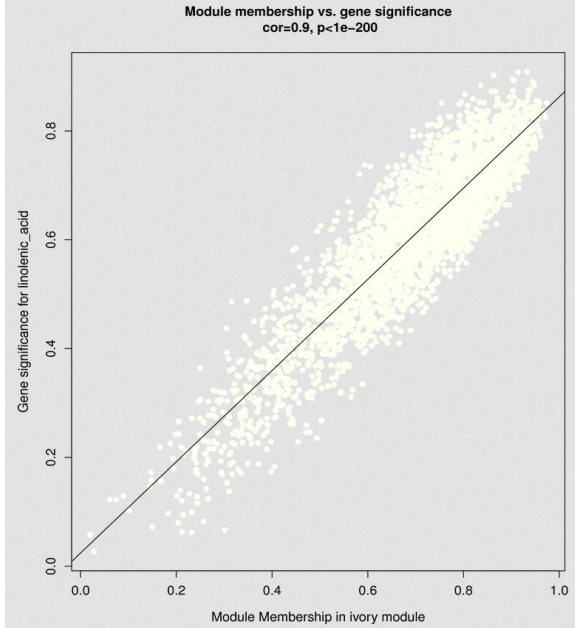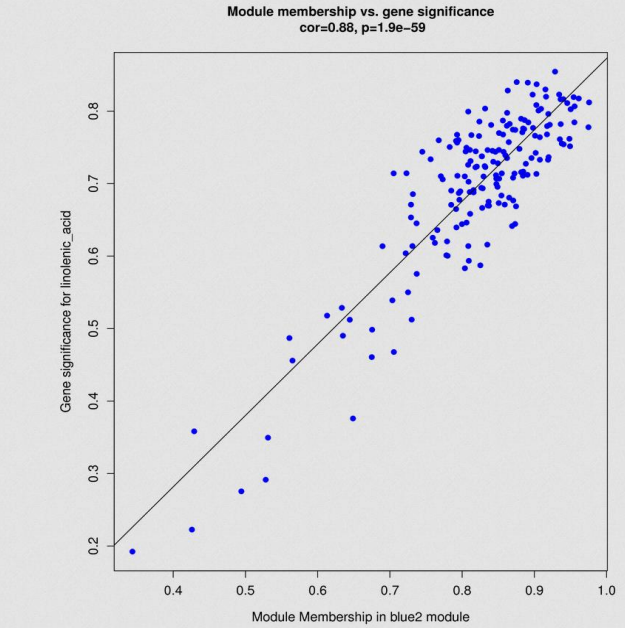

Supplementary Figure S5: The most positive and negative modules of mRNAs related to oil content and fatty acids
