# Supplementary material for: Integrated Analysis of lncRNA–mRNA Regulatory Networks Related to Lipid Metabolism in High-Oleic-Acid Rapeseed
Source: MDPI journal article supplement (doi:10.3390/ijms24076277), 2023-03-27
Supplement: s1 [file s1]

Supplementary Table S1 Correlation analysis between oil content and fatty acid composition

|                | oleic acid | linoleic acid | linolenic acid | palmitic acid | stearic acid | oil<br>content |
|----------------|------------|---------------|----------------|---------------|--------------|----------------|
| oleic acid     | 1          |               |                |               |              |                |
| linoleic acid  | -0.911**   | 1             |                |               |              |                |
| linolenic acid | -0.910**   | 0.861**       | 1              |               |              |                |
| palmitic acid  | -0.857**   | 0.635**       | 0.667**        | 1             |              |                |
| stearic acid   | -0.424*    | 0.226         | 0.261          | 0.653**       | 1            |                |
| oil content    | 0.728**    | -0.546**      | -0.608**       | -0.834**      | -0.753**     | 1              |

Note: the correlation based on Pearson correlation test.

\* Correlation is significant at the 0.05 level (two-tailed); \*\* correlation is significant at the 0.01 level (two-tailed).
