# Supplementary material for: Integrated Analysis of lncRNA–mRNA Regulatory Networks Related to Lipid Metabolism in High-Oleic-Acid Rapeseed
Source: MDPI journal article supplement (doi:10.3390/ijms24076277), 2023-03-27
Supplement: s1 [file s1]

# mRNA

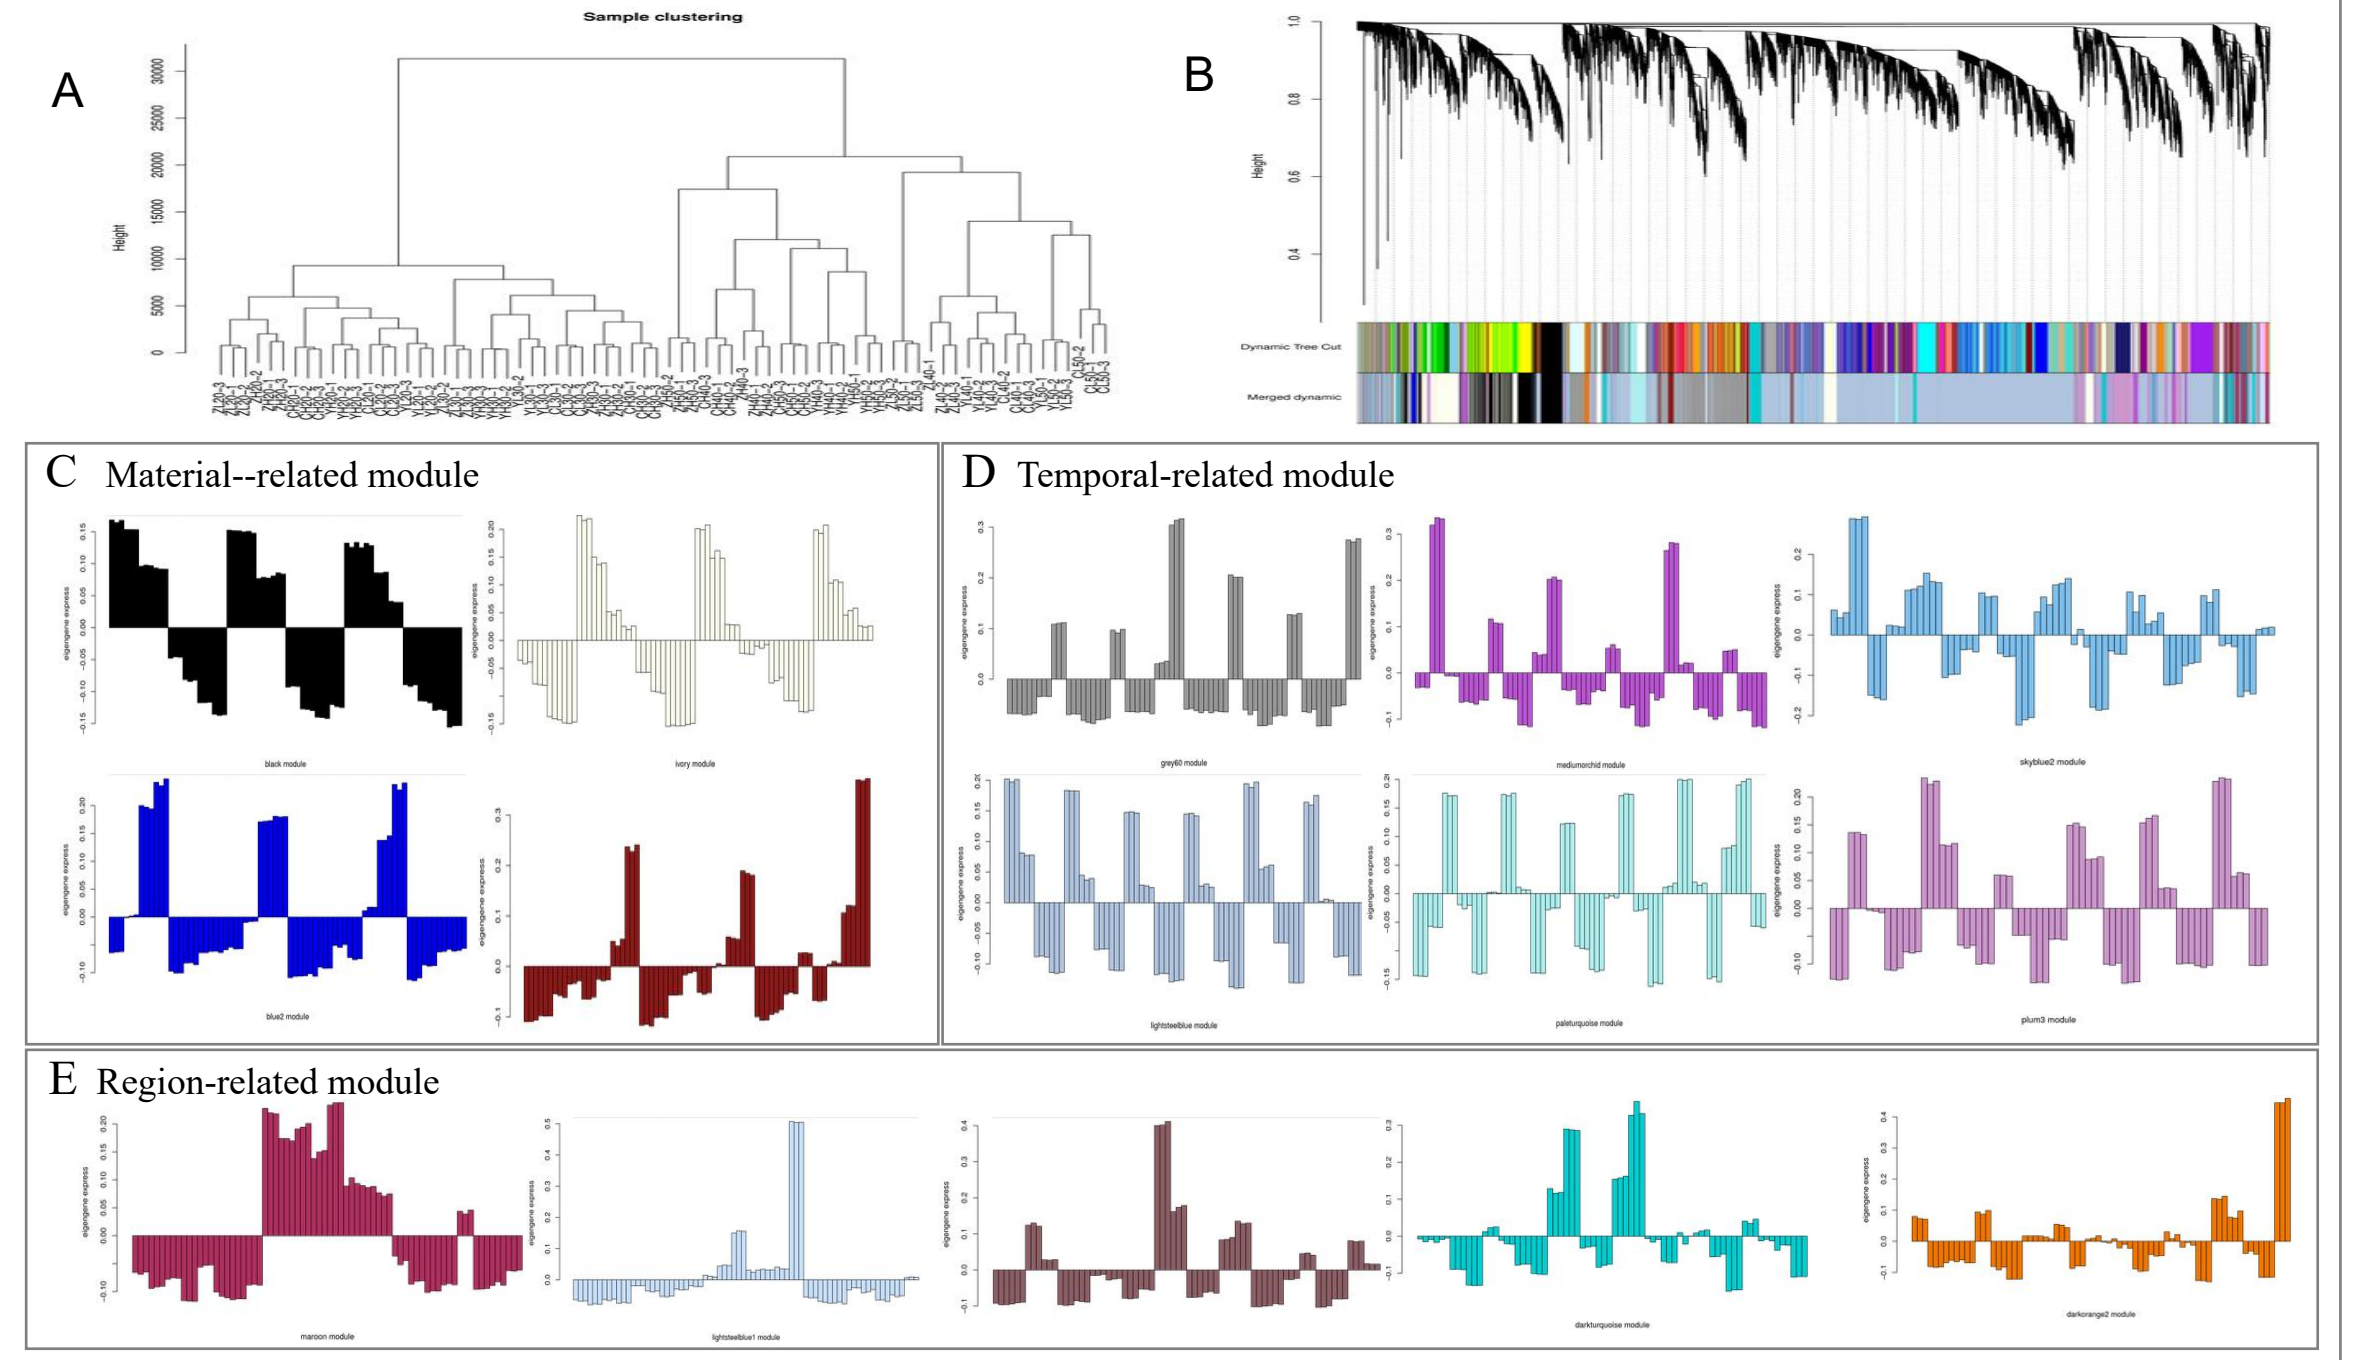

Figure S3. The discrete expression modules of lncRNA expression by WGCNA analysis. (A) Sample hierarchical clustering tree; (B) module hierarchical clustering diagram; (C) material-related modules; (D) temporal-related modules; and (E) region-related modules. Note: Different colors of (C)–(E) represent different expression modules, in the order from left to right and top to bottom, as follows: (C): black module, ivory module, blue2 module, and firebrick4 module; (D): grey60 module, mediumorchid module, skyblue2 module, lightsteelblue module, paleturquoise module, plum3 module; (E): maroon module, lightsteelblue1 module, lightpink4 module, darkturquoise module, darkorange2 module
