# Supplementary material for: Integrated Analysis of lncRNA–mRNA Regulatory Networks Related to Lipid Metabolism in High-Oleic-Acid Rapeseed
Source: MDPI journal article supplement (doi:10.3390/ijms24076277), 2023-03-27
Supplement: s1 [file s1]

Supplementary Table S4 Primer information of qRT-PCR

| Primer name        | Primer sequence (5' - 3')  |
|--------------------|----------------------------|
| M35596-F           | GATCGTTTTTCTGGCCGACG       |
| M35596-R           | AAAAGCGACAGACCACCGAT       |
| M67849-F           | CACTCATCGGCACTCAAGGT       |
| M67849-R           | CACTCATCGGCACTCAAGGT       |
| M54886-F           | GGCTCCTCTGCTGGGTTTATT      |
| M54886-R           | ACCACAGCATCCACATGGTA       |
| M54890-F           | CAGAAGCAACTGCCATTCGG       |
| M54890-R           | AGTTTCAGAAAGCAAGGCCA       |
| BnaA07G0011800ZS-F | CCTCCAACGGACTTCTTCCTGATTC  |
| BnaA07G0011800ZS-R | GCCTCCACCTGATTCCCTAATTTTCG |
| BnaC07G0026200ZS-F | TTCCGTAAGTGTTCGATGCTGAC    |
| BnaC07G0026200ZS-R | GACTCTCCCTCACCTCCGATG      |
| BnaA02G0049700ZS-F | TGGATTTCGTGCTGCTGGTTCATC   |
| BnaA02G0049700ZS-R | GGATGCTTCGCCTTGAGACCTTC    |
| BnaC02G0057200ZS-F | TGGATTTCGTGCTGCTGGTTCATAG  |
| BnaC02G0057200ZS-R | GCTTCGCCCTGAGACCTTCTTTC    |
| Act-F              | GGTTGGGATGGACCAGAAGG       |
| Act-R              | TCAGGAGCAATACGGAGC         |
