# Supplementary material for: Integrated Analysis of lncRNA–mRNA Regulatory Networks Related to Lipid Metabolism in High-Oleic-Acid Rapeseed
Source: Int J Mol Sci. 2023 Mar 27;24(7):6277. doi: 10.3390/ijms24076277 (PMC10093948; doi:10.3390/ijms24076277)
Supplement: Supplementary file 1 [file ijms-24-06277-s001.zip › Supplementary Table S2.xlsx]

## Sheet: index
Supplemental Table S2- Summary of the RNA-Seq sequencing information and the gene expression values in all seed samples.
Sequencing: The sequencing and alignment information for all RNA-seq samples
mRNA RPKM: The expression level (RPKM) for each mRNA genes detected in our study
lncRNA RPKM: The expression level (RPKM) for each lncRNA genes detected in our study
mRNAs&lncRNAs-FPKM≥5,10,20: The number of mRNAs and lncRNAs with FPKM ≥ 5, 10 and 20, respectively

## Sheet: Sequencing
	Area	Sample Type	Sample	RawDatas	CleanData(%)	Unmapped(%)	Unique_Mapped(%)	Multiple_Mapped(%)	Total_Mapped(%)
	Changsha	High oleic acid rapeseed	CH20-1	87306120	86518730 (99.10%)	7921168 (9.59%)	60998383 (73.88%)	13643521 (16.52%)	74641904 (90.41%)
			CH20-2	95463940	94806172 (99.31%)	8475020 (9.36%)	67086018 (74.09%)	14981604 (16.55%)	82067622 (90.64%)
			CH20-3	84997780	84383908 (99.28%)	7480804 (9.32%)	59552483 (74.20%)	13220957 (16.47%)	72773440 (90.68%)
			CH30-1	94800984	94154752 (99.32%)	7972483 (8.93%)	64547858 (72.27%)	16789003 (18.80%)	81336861 (91.07%)
			CH30-2	78448442	77770120 (99.14%)	6840592 (9.13%)	54228457 (72.37%)	13867745 (18.51%)	68096202 (90.87%)
			CH30-3	87510170	86786906 (99.17%)	7524209 (9.01%)	60700344 (72.65%)	15327553 (18.34%)	76027897 (90.99%)
			CH40-1	82947636	82334534 (99.26%)	6475898 (8.52%)	55646013 (73.20%)	13901817 (18.29%)	69547830 (91.48%)
			CH40-2	81885866	81296638 (99.28%)	6572401 (8.67%)	55609839 (73.34%)	13646884 (18.00%)	69256723 (91.33%)
			CH40-3	85172312	84657624 (99.40%)	6833000 (8.64%)	58133772 (73.53%)	14089182 (17.82%)	72222954 (91.36%)
			CH50-1	96102976	95319624 (99.18%)	7936428 (9.00%)	64967190 (73.70%)	15248310 (17.30%)	80215500 (91.00%)
			CH50-2	83710232	83158688 (99.34%)	6678874 (8.63%)	57465385 (74.23%)	13271171 (17.14%)	70736556 (91.37%)
			CH50-3	99698664	98935630 (99.23%)	7657940 (8.32%)	67899707 (73.78%)	16477779 (17.90%)	84377486 (91.68%)
		Low oleic acid rapeseed	CL20-1	81939434	81295636 (99.21%)	6919447 (8.98%)	58022307 (75.29%)	12124994 (15.73%)	70147301 (91.02%)
			CL20-2	91509010	90732338 (99.15%)	8111801 (9.31%)	65860403 (75.57%)	13183590 (15.13%)	79043993 (90.69%)
			CL20-3	75752290	75036360 (99.05%)	6644448 (9.19%)	54737831 (75.71%)	10912425 (15.09%)	65650256 (90.81%)
			CL30-1	91076216	90163084 (99.00%)	7223941 (8.40%)	61298228 (71.24%)	17519819 (20.36%)	78818047 (91.60%)
			CL30-2	79015848	78450884 (99.28%)	6189567 (8.09%)	54264742 (70.95%)	16032497 (20.96%)	70297239 (91.91%)
			CL30-3	89141248	88594702 (99.39%)	6966157 (8.06%)	61144136 (70.74%)	18320139 (21.20%)	79464275 (91.94%)
			CL40-1	96037340	95415088 (99.35%)	7500242 (8.10%)	66461906 (71.80%)	18607128 (20.10%)	85069034 (91.90%)
			CL40-2	82717410	82263216 (99.45%)	6847661 (8.77%)	55872158 (71.55%)	15372541 (19.69%)	71244699 (91.23%)
			CL40-3	80703256	79967356 (99.09%)	6595566 (8.59%)	54811840 (71.39%)	15375246 (20.02%)	70187086 (91.41%)
			CL50-1	95270124	94460450 (99.15%)	7546950 (8.36%)	67150544 (74.40%)	15563400 (17.24%)	82713944 (91.64%)
			CL50-2	92504534	92049390 (99.51%)	7422451 (8.44%)	65804821 (74.80%)	14747466 (16.76%)	80552287 (91.56%)
			CL50-3	103460716	102683166 (99.25%)	7597077 (7.74%)	73351179 (74.70%)	17245660 (17.56%)	90596839 (92.26%)
	Yunnan	High oleic acid rapeseed	YH20-1	83939454	83317884 (99.26%)	8696775 (10.78%)	60433446 (74.92%)	11536333 (14.30%)	71969779 (89.22%)
			YH20-2	88179862	87457786 (99.18%)	8755544 (10.47%)	62348222 (74.59%)	12484180 (14.94%)	74832402 (89.53%)
			YH20-3	81868012	81296062 (99.30%)	8176697 (10.47%)	58359592 (74.73%)	11561653 (14.80%)	69921245 (89.53%)
			YH30-1	80628772	80157326 (99.42%)	7390529 (9.55%)	56182820 (72.57%)	13841487 (17.88%)	70024307 (90.45%)
			YH30-2	78986102	78387000 (99.24%)	7273729 (9.59%)	54772929 (72.21%)	13806712 (18.20%)	68579641 (90.41%)
			YH30-3	74310816	73873414 (99.41%)	6958236 (9.71%)	51778116 (72.29%)	12892528 (18.00%)	64670644 (90.29%)
			YH40-1	81775078	81239956 (99.35%)	9460366 (12.26%)	54892344 (71.15%)	12799636 (16.59%)	67691980 (87.74%)
			YH40-2	86406086	85691438 (99.17%)	9946826 (12.46%)	56836168 (71.19%)	13057740 (16.35%)	69893908 (87.54%)
			YH40-3	73376970	72775588 (99.18%)	8375130 (12.19%)	49060838 (71.43%)	11246108 (16.37%)	60306946 (87.81%)
			YH50-1	85821118	85304068 (99.40%)	7982745 (9.83%)	59641756 (73.41%)	13621461 (16.77%)	73263217 (90.17%)
			YH50-2	76545322	75896000 (99.15%)	7226004 (10.14%)	52299193 (73.42%)	11712377 (16.44%)	64011570 (89.86%)
			YH50-3	78032364	77228024 (98.97%)	7227400 (9.96%)	53207546 (73.33%)	12121444 (16.71%)	65328990 (90.04%)
		Low oleic acid rapeseed	YL20-1	79574394	78807318 (99.04%)	8504191 (11.51%)	54305287 (73.50%)	11076506 (14.99%)	65381793 (88.49%)
			YL20-2	84005850	83204932 (99.05%)	9033302 (11.33%)	58818236 (73.74%)	11909002 (14.93%)	70727238 (88.67%)
			YL20-3	79089620	78007918 (98.63%)	9200889 (12.22%)	54847414 (72.87%)	11222551 (14.91%)	66069965 (87.78%)
			YL30-1	84860932	84160698 (99.17%)	9539039 (11.82%)	56798462 (70.38%)	14370333 (17.81%)	71168795 (88.18%)
			YL30-2	89813274	88774894 (98.84%)	10233389 (12.08%)	60226052 (71.08%)	14271955 (16.84%)	74498007 (87.92%)
			YL30-3	87012622	86357412 (99.25%)	9892283 (11.97%)	58466518 (70.77%)	14260275 (17.26%)	72726793 (88.03%)
			YL40-1	89349090	88569196 (99.13%)	13330403 (15.91%)	56150794 (67.01%)	14307991 (17.08%)	70458785 (84.09%)
			YL40-2	90921648	90222932 (99.23%)	13663107 (15.85%)	57517681 (66.71%)	15035668 (17.44%)	72553349 (84.15%)
			YL40-3	81334102	80786518 (99.33%)	11363950 (15.71%)	48641734 (67.24%)	12331646 (17.05%)	60973380 (84.29%)
			YL50-1	78839712	78127528 (99.10%)	10433146 (14.05%)	52469190 (70.67%)	11339462 (15.27%)	63808652 (85.95%)
			YL50-2	78647814	78118472 (99.33%)	10474083 (14.15%)	52273873 (70.62%)	11275076 (15.23%)	63548949 (85.85%)
			YL50-3	73849852	73361276 (99.34%)	9822210 (14.10%)	49163558 (70.58%)	10668028 (15.32%)	59831586 (85.90%)
	Zhejiang	High oleic acid rapeseed	ZH20-1	75951840	75414744 (99.29%)	5960029 (8.47%)	52367027 (74.40%)	12058436 (17.13%)	64425463 (91.53%)
			ZH20-2	76688364	76252986 (99.43%)	6337031 (8.61%)	53671708 (72.90%)	13611679 (18.49%)	67283387 (91.39%)
			ZH20-3	78898568	78400190 (99.37%)	6347360 (8.40%)	55824067 (73.87%)	13400823 (17.73%)	69224890 (91.60%)
			ZH30-1	86241332	85573524 (99.23%)	7473274 (9.09%)	60497460 (73.59%)	14240328 (17.32%)	74737788 (90.91%)
			ZH30-2	76054716	75499480 (99.27%)	6155584 (8.40%)	54138545 (73.90%)	12961955 (17.69%)	67100500 (91.60%)
			ZH30-3	76995766	76474332 (99.32%)	6258923 (8.51%)	54345952 (73.91%)	12928209 (17.58%)	67274161 (91.49%)
			ZH40-1	83652442	83097902 (99.34%)	6937971 (8.87%)	57668691 (73.74%)	13599566 (17.39%)	71268257 (91.13%)
			ZH40-2	86282112	85729574 (99.36%)	7193716 (8.87%)	59918547 (73.91%)	13962165 (17.22%)	73880712 (91.13%)
			ZH40-3	99375688	98463014 (99.08%)	8818495 (9.42%)	68665863 (73.35%)	16123822 (17.22%)	84789685 (90.58%)
			ZH50-1	80918118	80346530 (99.29%)	6595717 (8.73%)	56455030 (74.71%)	12511225 (16.56%)	68966255 (91.27%)
			ZH50-2	84286320	83722782 (99.33%)	6699530 (8.46%)	59335542 (74.95%)	13136908 (16.59%)	72472450 (91.54%)
			ZH50-3	82925788	82315616 (99.26%)	6549586 (8.56%)	57348408 (74.95%)	12621466 (16.49%)	69969874 (91.44%)
		Low oleic acid rapeseed	ZL20-1	79867200	78856022 (98.73%)	6824543 (9.46%)	51561200 (71.46%)	13766871 (19.08%)	65328071 (90.54%)
			ZL20-2	77733520	76897528 (98.92%)	6726636 (9.52%)	50373556 (71.28%)	13571194 (19.20%)	63944750 (90.48%)
			ZL20-3	75169568	74552960 (99.18%)	6132441 (9.03%)	49092768 (72.28%)	12691009 (18.69%)	61783777 (90.97%)
			ZL30-1	77186586	76595584 (99.23%)	6761285 (9.33%)	51682276 (71.34%)	13999199 (19.32%)	65681475 (90.67%)
			ZL30-2	76113966	75498972 (99.19%)	6709771 (9.40%)	51020856 (71.47%)	13657943 (19.13%)	64678799 (90.60%)
			ZL30-3	89084098	88263814 (99.08%)	8033540 (9.62%)	59317090 (71.02%)	16172190 (19.36%)	75489280 (90.38%)
			ZL40-1	88439348	87802052 (99.28%)	6784196 (8.21%)	60994476 (73.84%)	14823466 (17.95%)	75817942 (91.79%)
			ZL40-2	93519910	91694294 (98.05%)	8079743 (9.32%)	63192030 (72.90%)	15406825 (17.77%)	78598855 (90.68%)
			ZL40-3	96855068	94418326 (97.48%)	8583557 (9.57%)	65070977 (72.57%)	16017968 (17.86%)	81088945 (90.43%)
			ZL50-1	85176334	84335480 (99.01%)	7427796 (9.28%)	60380623 (75.45%)	12221271 (15.27%)	72601894 (90.72%)
			ZL50-2	77731348	77099092 (99.19%)	6640612 (9.01%)	55875539 (75.79%)	11212599 (15.21%)	67088138 (90.99%)
			ZL50-3	94427296	93629380 (99.15%)	8049000 (8.97%)	67782880 (75.52%)	13919742 (15.51%)	81702622 (91.03%)
				8.44988e+07

## Sheet: mRNA RPKM
id	CH20-1_fpkm	CH20-2_fpkm	CH20-3_fpkm	CH30-1_fpkm	CH30-2_fpkm	CH30-3_fpkm	CH40-1_fpkm	CH40-2_fpkm	CH40-3_fpkm	CH50-1_fpkm	CH50-2_fpkm	CH50-3_fpkm	CL20-1_fpkm	CL20-2_fpkm	CL20-3_fpkm	CL30-1_fpkm	CL30-2_fpkm	CL30-3_fpkm	CL40-1_fpkm	CL40-2_fpkm	CL40-3_fpkm	CL50-1_fpkm	CL50-2_fpkm	CL50-3_fpkm	YH20-1_fpkm	YH20-2_fpkm	YH20-3_fpkm	YH30-1_fpkm	YH30-2_fpkm	YH30-3_fpkm	YH40-1_fpkm	YH40-2_fpkm	YH40-3_fpkm	YH50-1_fpkm	YH50-2_fpkm	YH50-3_fpkm	YL20-1_fpkm	YL20-2_fpkm	YL20-3_fpkm	YL30-1_fpkm	YL30-2_fpkm	YL30-3_fpkm	YL40-1_fpkm	YL40-2_fpkm	YL40-3_fpkm	YL50-1_fpkm	YL50-2_fpkm	YL50-3_fpkm	ZH20-1_fpkm
BnaA01G0000100ZS	0.31	0.17	0.13	0	0	0	0	0	0	0	0	0	0.42	0.53	0.48	0	0	0	0	0	0	0	0	0	0.19	0	0.07	0	0	0	0	0	0	0	0	0	0.42	0.26	0.07	0	0	0	0.07	0	0	0	0	0	0.52
BnaA01G0000200ZS	9.63	9.13	10.06	8.15	7.5	9.62	4.76	5.52	6.15	5.95	5.86	5.9	6.45	7.7	7.6	4.45	4.15	4.44	2.93	2.71	2.85	3.55	2.26	3.06	7.71	6.46	7.19	5.99	6.16	7.64	4.23	4.21	3.71	3.09	3.8	3.72	6.39	5.7	5.72	3.12	3.92	2.69	2.37	2.18	2.14	1.56	0.85	1.7	10.85
BnaA01G0000300ZS	0	0	0	0.06	0	0	0	0	0.13	0	0	0.16	0.17	0	0.22	0	0.13	0	0	0	0	0	0	0.1	0	0.08	0	0.21	0.07	0.07	0.63	0.47	0.33	0.47	1.2	0.64	0	0.16	0	0.14	0	0.07	0.07	0.06	0.08	0.15	0.15	0.09	0
BnaA01G0000400ZS	1.07	0.68	0.52	0.55	0.85	0.85	0.4	0.75	0.24	0.44	0.45	0.37	0.15	0.44	0.48	0.77	0.49	0.44	0.16	0	0.3	0.29	0.09	0.14	0.72	0.56	0.79	0.45	0.81	0.65	0.31	0.4	0.29	0.09	0.24	0.32	0.47	0.39	0.11	0.47	0.6	0.45	0.2	0.45	0.4	0.22	0.38	0.29	0.7
BnaA01G0000500ZS	0	0	0	0	0	0	0.15	0	0	0	0	0	0.06	0	0	0	0	0	0	0	0.05	0	0	0	0	0	0	0	0	0	0	0.07	0.28	0	0.05	0	0.07	0.05	0	0	0	0	0.37	0.14	0	0	0	0	0
BnaA01G0000600ZS	4.6	4.36	4.78	8.53	8.19	8.56	4.84	4.83	4.98	3.32	4.47	4.23	4.01	3.39	3.62	6.54	3.96	5.21	4.82	4.35	4.52	3.53	3.82	1.86	3.27	4.32	2.99	5.81	4.84	5.59	2.26	3.32	3.97	2.19	1.85	1.37	4.31	2.31	3.45	2.92	3.95	3.34	1.35	2.52	2.73	1.91	2.65	1.81	3.48
BnaA01G0000700ZS	3.1	4.68	2.46	0.43	0.13	1	0.62	0.38	0	0.25	0.09	0	8.84	8.38	8.49	1.32	1.48	1.81	0.62	0.67	0.25	0.95	0.73	1.1	4.19	5.2	4.31	0.67	0.59	0.5	0.51	0.28	0.61	1.01	0.73	0.64	6.06	5.96	6.02	1.56	1.63	1.48	0.82	0.72	1.3	0.6	1.25	0.54	6.07
BnaA01G0000800ZS	0	0.01	0.03	0	0	0.02	0	0	0	0	0	0	0	0	0.02	0.02	0.04	0.01	0.02	0.04	0.02	0	0	0	0	0	0	0.02	0.02	0.03	0	0	0	0	0	0	0	0	0	0.01	0.01	0.02	0.01	0.02	0	0	0	0	0
BnaA01G0000900ZS	0.58	0.31	0.32	0.77	0.81	1.14	0.56	0.59	0.61	0.89	0.81	0.58	0.35	0.47	0.42	0.84	0.6	0.62	0.65	0.91	0.73	0.37	0.39	0.24	0.12	0.26	0.13	1.21	1.1	0.87	0.29	0.54	0.36	0.69	0.69	0.43	0.31	0.3	0.22	0.88	1.21	1.11	0.42	0.46	0.46	0.45	0.55	0.85	0.42
BnaA01G0001000ZS	22.95	0	2.54	17.29	0.74	0.04	0	4.06	4.71	2.71	2.37	2.55	16.56	16.88	19.01	11.76	10.81	11.14	10.69	11.17	8.98	6.47	6.05	6.26	24.75	6.02	24.65	0.92	0	0	0	0	4.46	2.13	2.04	2.07	19.96	17.56	20.53	8.53	9.21	8.42	8.63	8.17	8.79	5.67	5.42	5.35	19.09
BnaA01G0001100ZS	0.14	0	0	0	0.05	0	0	0	0	0	0	0.04	0.1	0.13	0.15	0.21	0.05	0.04	0.16	0.05	0.14	0	0	0	0	0	0	0.1	0	0	0	0	0	0	0.05	0	0	0	0.1	0.05	0.09	0.19	0	0	0.11	0	0	0	0
BnaA01G0001200ZS	0	0.39	0	0.52	0	0.15	0.13	0	0	0.47	0	0.17	0.46	0	0.12	0	0.29	0	0.44	0.14	0	0.53	0.17	0.15	0	0.21	0.11	0	0.41	0	0	0	0	0	0	0.52	0	0.46	0	0.1	0	0	0	0	0.28	0	0.16	0.2	0.36
BnaA01G0001300ZS	0	0	0	0	0	0	0.14	0	0	0.27	0	0	0.53	0.54	0.53	0.11	0	0.03	0.34	0.12	0	0.05	0.06	0.1	0	0	0	0	0	0	0.08	0.25	0	0	0	0	0.17	0.2	0.63	0.16	0.36	0.18	0.25	0.19	0.07	0.42	0.07	0.21	0.31
BnaA01G0001400ZS	0.14	0	0	0	0.05	0	0	0	0	0	0	0.04	0.1	0.13	0.15	0.21	0.05	0.04	0.16	0.05	0.14	0	0	0	0	0	0	0.1	0	0	0	0	0	0	0.05	0	0	0	0.1	0.05	0.09	0.19	0	0	0.11	0	0	0	0
BnaA01G0001500ZS	2	22	19.12	1.11	17.15	17.11	5.26	0.43	0.43	0.42	0.14	0.28	1.68	2.68	2.01	1.32	0.89	0.88	0.86	1.07	1.08	0.55	0.57	0.44	2.11	21.32	3.51	16.56	17.36	18.4	4.7	4.88	0.54	0.11	0.08	0.2	1.41	2.56	1.68	0.86	0.94	0.96	0.87	1.12	1.15	0.63	0.46	0.6	2.13
BnaA01G0001600ZS	0.58	0.31	0.32	0.77	0.81	1.14	0.56	0.59	0.61	0.89	0.81	0.58	0.35	0.47	0.42	0.84	0.6	0.62	0.65	0.91	0.73	0.37	0.39	0.24	0.12	0.26	0.13	1.21	1.1	0.87	0.29	0.54	0.36	0.69	0.69	0.43	0.31	0.3	0.22	0.88	1.21	1.11	0.42	0.46	0.46	0.45	0.55	0.85	0.42
BnaA01G0001700ZS	0	0.01	0.03	0	0	0.02	0	0	0	0	0	0	0	0	0.02	0.02	0.04	0.01	0.02	0.04	0.02	0	0	0	0	0	0	0.02	0.02	0.03	0	0	0	0	0	0	0	0	0	0.01	0.01	0.02	0.01	0.02	0	0	0	0	0
BnaA01G0001800ZS	3.1	4.68	2.46	0.43	0.13	1	0.62	0.38	0	0.25	0.09	0	8.84	8.38	8.49	1.32	1.48	1.81	0.62	0.67	0.25	0.95	0.73	1.1	4.19	5.2	4.31	0.67	0.59	0.5	0.51	0.28	0.61	1.01	0.73	0.64	6.06	5.96	6.02	1.56	1.63	1.48	0.82	0.72	1.3	0.6	1.25	0.54	6.07
BnaA01G0001900ZS	4.6	4.36	4.78	8.53	8.19	8.56	4.84	4.83	4.98	3.32	4.47	4.23	4.01	3.39	3.62	6.54	3.96	5.21	4.82	4.35	4.52	3.53	3.82	1.86	3.27	4.32	2.99	5.81	4.84	5.59	2.26	3.32	3.97	2.19	1.85	1.37	4.31	2.31	3.45	2.92	3.95	3.34	1.35	2.52	2.73	1.91	2.65	1.81	3.48
BnaA01G0002000ZS	0.23	0.44	0.23	0.23	0.06	0.39	0.41	0.38	0.29	0.57	0.44	0.12	0.67	0.42	0.07	0.39	0.49	0.13	0.14	0.62	0.5	0.33	0.16	0.41	0.09	0.26	0.2	0.15	0.28	0.34	0.57	0.68	0.23	0.37	0	0.54	0.29	0.06	0	0.13	0.18	0.33	0.32	0.33	0.43	0.36	0.2	0.34	0.2
BnaA01G0002100ZS	1.07	0.68	0.52	0.55	0.85	0.85	0.4	0.75	0.24	0.44	0.45	0.37	0.15	0.44	0.48	0.77	0.49	0.44	0.16	0	0.3	0.29	0.09	0.14	0.72	0.56	0.79	0.45	0.81	0.65	0.31	0.4	0.29	0.09	0.24	0.32	0.47	0.39	0.11	0.47	0.6	0.45	0.2	0.45	0.4	0.22	0.38	0.29	0.7
BnaA01G0002200ZS	9.63	9.13	10.06	8.15	7.5	9.62	4.76	5.52	6.15	5.95	5.86	5.9	6.45	7.7	7.6	4.45	4.15	4.44	2.93	2.71	2.85	3.55	2.26	3.06	7.71	6.46	7.19	5.99	6.16	7.64	4.23	4.21	3.71	3.09	3.8	3.72	6.39	5.7	5.72	3.12	3.92	2.69	2.37	2.18	2.14	1.56	0.85	1.7	10.85
BnaA01G0002300ZS	0	0.11	0.06	0	0	0	0	0	0	0	0	0	0	0.05	0	0	0	0	0	0	0	0	0	0	0	0	0	0	0	0	0	0	0	0	0	0	0	0	0	0	0	0	0	0.12	0	0	0	0	0.27
BnaA01G0002400ZS	0	0	0	0	0	0	0	0	0	0	0	0	0	0	0	0.1	0.23	0.1	0.1	0	0.35	0	0	0	0	0	0	0	0	0	0	0	0	0	0.13	0.13	0	0	0	0	0	0.34	0.47	0.58	0	0	0	0	0
BnaA01G0002500ZS	0	0	0	0	0	0	0	0	0	0	0	0	0	0	0	0	0	0	0	0.11	0	0	0	0	0	0	0	0	0.11	0	0	0	0	0	0	0	0	0	0	0	0	0.21	0	0	0.13	0	0	0	0
BnaA01G0002600ZS	0.16	0.07	0.17	0.52	0.07	0.1	0.45	0.44	0.46	0.13	0.09	0.25	0.02	0	0	0.04	0	0.07	0.05	0	0	0	0	0	0	0.08	0.09	0.07	0.13	0.02	0.23	0.39	0.25	0.45	0.38	0.39	0	0	0	0	0	0	0	0	0.05	0	0	0	0.02
BnaA01G0002700ZS	2.41	2.57	2.66	5.11	4.04	4.65	1.98	1.64	1.47	4.6	4.6	5.31	4.37	4.69	4.12	4.1	3.75	4.33	2.67	2.65	2.31	3.73	4.17	3.98	4.11	3.63	4.28	2.58	2.21	2.9	1.56	1.7	1.27	3.83	3.69	3.63	4.69	4.1	4.41	2.31	2.09	2.12	1.72	1.93	1.75	2.79	3.13	3.64	2.98
BnaA01G0002800ZS	6.1	4.17	5.97	4.96	4.78	5.05	4.28	3.96	4.28	4.82	4.16	4.55	5.97	5.12	7.56	4.8	4.86	4.19	4.92	4.53	5.06	4.48	3.65	4.44	3.6	2.45	3.96	4.27	4.71	3.96	4.66	4.42	4.8	4.92	4.54	3.84	4.76	5.02	5.28	4.6	5.21	5.91	3.77	3.33	3.68	4.6	3.45	4.54	3.53
BnaA01G0002900ZS	0	0	0	0	0.03	0.02	0.03	0	0	0	0	0	0.03	0	0	0	0	0	0	0	0	0	0	0	0.07	0	0	0.03	0	0	0.03	0	0	0	0.03	0	0.27	0.4	0.56	0.23	0.23	0.14	0.24	0.6	0.43	0.04	0	0	0
BnaA01G0003000ZS	0	0	0	0	0	0	0	0	0	0	0.11	0	0.45	0.4	0.84	6.17	4.8	3.86	2.61	2.29	3.36	0.02	0.11	0.12	0.79	0.04	0.89	0	0	0.18	1.46	1.77	1.35	0.39	0.54	0.29	0.75	1.41	0.83	3.89	3.39	2.95	2.38	1.37	4.2	0	0.52	0.97	0
BnaA01G0003100ZS	40.1	38.27	41.44	0	0	0.17	0.05	0.17	0	0.04	0.02	0.04	9.24	9.31	10.1	0.12	0.12	0	0	0	0	0	0	0	2.2	3.85	2.56	0.17	0.02	0	0.02	0.1	0.03	0.05	0.08	0	3.58	2.75	3.96	0.02	0	0	0	0.16	0.33	0.18	0.18	0	21.21
BnaA01G0003200ZS	0.3	0.44	0.44	6.6	7.55	7.9	1.31	1.56	1.52	0.34	0.38	0.37	0.51	0.68	0.94	5.07	4.9	5.2	1.91	1.98	2.3	0.21	0.17	0.28	1.3	1	1.19	2.92	3.06	3.7	1	0.9	1.09	0.2	0.24	0.17	1.25	2.07	1.33	2.41	2.42	2.39	1.81	1.85	1.63	0.36	0.37	0.23	0.63
BnaA01G0003300ZS	1.15	0.36	1.26	0	0.09	0.04	0	0	0	0	0	0.28	2.84	2.36	2.2	0.25	0	0	0	0	0	0	0.24	0	1.55	1.3	1.93	0	0.33	0	0.3	0.31	0.17	0	1.52	0.57	0.31	0.73	0.69	0.05	0.33	0	0.16	0.3	0.38	0.55	0.14	0.29	1.84
BnaA01G0003400ZS	0	0.02	0	0.02	0	0	0.25	0.45	0.43	0.52	0.29	0.29	0	0.13	0	0	0.02	0	0.04	0	0.05	0.04	0.13	0	0	0.09	0	0	0	0	0.05	0.25	0.23	0.14	0.11	0.47	0.05	0	0	0.02	0	0	0	0.02	0	0.11	0.11	0.34	0
BnaA01G0003500ZS	16.22	14.17	13.39	16.07	16.66	15.12	15.29	16.57	17.77	17.08	15.93	16.05	26.12	26.95	27.17	17.63	17.83	17.17	16.75	16.55	16.83	16.71	18.18	16.44	19.07	19.14	18.28	12.69	10.62	12.87	12.33	12.43	12.12	8.07	8.73	7.26	26.45	27.08	24.81	17.68	17.17	16.29	14.53	13.37	13.91	15.59	17.37	17.65	18.88
BnaA01G0003600ZS	366.73	360.23	363.28	242.11	253.24	264.53	242.55	245.68	254.69	221.91	231.11	215.54	66.05	63.76	64.82	41.46	39	37.84	39.14	39.25	41.53	34.04	34.64	31.81	398.17	373.38	376.5	394.45	387.79	395.81	244.97	235.31	256.62	87.76	85.79	88.92	147.19	140.2	155.97	61.26	68.31	61.63	57.15	56.56	57.24	43.66	38.63	38.15	197.2
BnaA01G0003700ZS	0	0	0	0	0	0	0	0	0	0.09	0	0	0	0	0	0	0	0	0	0	0	0	0	0	0	0.1	0	0	0	0	0	0	0	0	0	0	0	0	0	0	0	0	0	0	0	0	0	0	0
BnaA01G0003800ZS	0.16	0.09	0.04	0.02	0.07	0.01	0.14	0.04	0.08	0.11	0.12	0.3	0.08	0.01	0.05	0	0.01	0	0	0.02	0.02	0.3	0.29	0.21	0.09	0.14	0.07	0.07	0.03	0	0.22	0.16	0.08	1.45	1.39	1.25	0.07	0	0.06	0.01	0	0.03	0.03	0.04	0.04	0.09	0.11	0.19	0.01
BnaA01G0003900ZS	0	0	0	0	0	0	0.07	0	0	0	0	0	0	0	0	0	0	0	0	0	0	0	0	0	0	0	0	0	0	0	0	0	0	0	0	0	0	0	0	0	0	0	0	0	0	0.22	0.01	0	0
BnaA01G0004000ZS	0	0.05	0.13	0.07	0	0	0	0.48	0.21	1.91	3.25	2.05	0.08	0	0	0	0	0	0.17	0.08	0.02	1.05	0.62	1.77	0	0	0	0.22	0.16	0	0.57	1.06	1.17	3.74	4.54	4.67	0	0.08	0	0.05	0.07	0.08	0.08	0	0	1.25	1.37	0.82	0
BnaA01G0004100ZS	0	0.38	0	0.37	0.18	0.73	0	0	0	0.28	0.3	1.28	0	0.04	0	0	1.44	0	0.7	0.89	0	0.93	0	0	0.71	1	0.32	2.05	0	0	2.17	0	0	1.08	1.57	0	0.95	0.51	1.42	0	0.57	0	0	0.55	0.01	0	0	1.39	0
BnaA01G0004200ZS	2.74	2.93	3.17	3.37	4.93	2.78	3.36	4.11	1.87	2.95	1.32	3.07	5.05	4.58	5.19	6.02	4.85	5.13	4.43	4.87	4.09	4.96	5.9	5.01	3.39	3.13	3.29	2.64	3.55	1.81	3.03	2.61	2.45	1.21	2.86	2.08	4.83	3.89	4.34	4.28	4.1	4.54	3.1	2.4	4.84	2.89	3.18	3.56	1.49
BnaA01G0004300ZS	4.78	4.32	4.21	5.04	7.4	2.89	0.05	0.87	1.42	1.74	1.97	1.31	13.27	11.56	10.46	16.86	12.9	15.49	5.95	5.33	6.22	6.13	6.48	3.96	4.9	4.85	3.06	3.96	2.37	3.28	0.98	1.52	2.91	0.72	2.08	0.15	11.44	12.86	12.5	8.59	13.46	9.5	5.93	3.12	3.94	4.54	3.09	4.42	6.08
BnaA01G0004400ZS	0	0	0	0	0	0	0	0	0	0	0	0	0	0	0	0	0	0	0	0	0	0	0	0	0	0	0	0	0	0	0	0	0	0	0	0	0	0	0	0	0	0	0	0	0	0	0	0	0
BnaA01G0004500ZS	2.94	0.6	3.2	1.02	0.86	0	0	0	0	0	0	0	14.14	11.61	12.14	21.67	17.84	20.15	14.95	14.54	15.52	12.08	7.22	8.78	5.06	4.86	6.46	0	0	2.95	0	0	0	1.07	0	0	19.09	16.79	24.72	16.65	21.24	17.71	15.66	13.26	13.78	32.18	28.38	25.7	4.49
BnaA01G0004600ZS	0.17	0	0	1.3	2.01	1.71	0	0	0	0	0.09	0	0	0	0.09	0	0	0	0	0	0	0	0	0	0.7	0.34	0.9	0.09	0	0	0	0	0	0	0	0	0	0.09	0	0	0	0	0	0	0	0	0	0	0
BnaA01G0004700ZS	61.17	62.29	60.12	72.26	78.62	79.45	45.98	47.05	47.07	17.66	17.59	17.8	1.84	1.5	1.93	2.5	2.81	2.09	6.19	6.27	6.91	3.81	4.02	4.18	80.61	77.9	79.54	43.37	44.57	45.29	31.92	32.36	31.3	14.79	14.53	14.61	3.8	3.28	3.98	4.38	4.3	4.17	7.01	7.23	7.27	4.65	4.61	4.63	21.5
BnaA01G0004800ZS	0	0	0	0	0	0	0	0	0	0	0	0	0	0	0	0	0	0	0	0	0	0	0	0	0	0	0	0	0	0	0	0	0	0	0	0	0	0	0	0	0	0	0	0	0	0	0	0	0
BnaA01G0004900ZS	10.67	13.42	13.01	13.41	16.3	16.17	7.08	7.43	8.13	3.87	3.39	4.09	6.04	4.53	6.22	4.44	4.04	4.48	2.56	3.49	3.03	1.95	1.6	1.21	20.3	18.41	17.93	15.48	13.89	12.24	6.17	5.31	5.69	3.79	2.94	2.88	8.13	8	7.4	4.16	4.68	4.43	2.15	1.36	1.03	1.32	1.04	1.18	12.88
BnaA01G0005000ZS	1.74	1.79	2.35	11.37	12.92	12.35	4.41	4.12	4.11	3.13	2.66	2.82	5.36	4.64	4.96	10.27	10.36	10.83	6.01	5.04	5.9	5.26	4.93	4.98	6.69	6.22	6.54	7.94	8.16	8.08	3.87	3.9	3.75	3.17	2.75	3.07	6.9	6.79	7.63	7.37	7.97	7.88	4.55	4.39	4.39	2.2	2.35	2.52	1.96
BnaA01G0005100ZS	0.07	0	0	0.1	0.08	0	0.08	0.04	0	0.03	0	0	0	0	0.08	0.06	0.18	0.06	0	0.18	0.18	0.03	0	0	0	0	0	0	0.19	0.25	0.04	0.11	0.04	0	0	0.16	0	0	0	0.07	0.03	0.04	0	0	0.09	0	0	0.13	0
BnaA01G0005200ZS	0	0	0	0	0	0	0	0	0	0	0	0	0	0	0	0	0	0	0	0	0	0	0	0	0	0	0	0	0	0	0	0	0	0	0	0	0	0	0	0	0	0	0	0	0	0	0	0	0
BnaA01G0005300ZS	15.12	15.26	13.41	13.01	11.04	9.79	12.27	12.73	13.54	12.92	13.05	13.91	14.33	13.5	12.83	8.16	8.01	7.79	6.81	7.89	8.51	15.76	15.88	14.11	10.67	11.65	11.34	8.97	11.24	12.92	10.11	11.31	10.72	14.49	13.97	12.43	12.28	10.97	10.04	8.83	7.23	8.33	8.13	5.87	7.41	10.46	9.3	10.53	10.61
BnaA01G0005400ZS	0	0	0	0	0	0	0	0	0	0	0	0	0	0.47	0	0.19	0	0.17	0	0	0	0	0	0	0	0	0	0	0	0.02	0	0	0	0	0	0	0	0.89	0	0	0	0	0	0	0	0	0	0	0
BnaA01G0005500ZS	0.86	0.79	1.54	1.06	0.84	0.96	0.69	0.74	0.76	0.65	1.15	1.42	0.63	0.4	0.67	0.2	0.36	0.12	0.41	0.18	0.18	0.35	0.24	0.07	1.34	1.21	0.6	0.73	0.94	1.2	0.91	0.6	0.64	1.36	0.36	1.22	0.29	0.49	0.52	0.27	0.85	0.18	0.18	0.09	0.11	0.15	0.2	0.16	1.1
BnaA01G0005600ZS	4.82	4.83	4.74	3.27	3.72	4.39	2.71	2.79	3.7	2.46	2.74	2.59	4.65	5.21	4.6	3.94	3.13	3.41	2.5	2.49	2.43	3.74	2.67	3.54	3.15	4.14	4.6	4.67	5.38	3.71	3.5	3.31	2.61	3.65	2.79	3.39	3.53	3.56	4.29	3.44	3.47	3.18	2.46	2.33	3.72	2.74	3.08	3.23	4.67
BnaA01G0005700ZS	2.66	2.97	2.46	2.08	2.08	2.55	2.24	2.24	2.21	2.16	2.16	1.47	1.01	0.77	0.53	0.47	0.66	0.59	0.23	0.44	0.64	0.55	0.75	0.31	2.98	2.31	1.85	3.86	2.79	4.23	1.27	1.26	1.38	0.43	0.87	0.3	0.57	0.3	0.5	0.87	0.76	0.55	0.31	0.41	0.43	0.09	0.13	0.03	2.41
BnaA01G0005800ZS	0.33	0.3	0.19	0.06	0.05	0.02	0	0	0	0	0	0.02	0.13	0.25	0.17	0	0	0	0	0	0.03	0	0	0.04	0	0.05	0.28	0	0	0	0	0	0	0.02	0	0	0.25	0.17	0.03	0	0	0.05	0	0	0	0	0	0	0.2
BnaA01G0005900ZS	0.16	0.02	0	0.02	0	0.03	0	0	0	0	0	0	0	0	0.03	0	0	0	0	0	0	0	0	0	0.14	0.03	0.06	0	0.06	0.03	0	0	0	0	0	0	0.03	0.03	0.06	0	0	0	0	0	0	0	0	0	0.03
BnaA01G0006000ZS	53.78	53.67	52.65	45.07	43.86	45.31	31.89	31.14	30.45	29.36	28.14	28.13	35.92	35.56	35.66	24.16	24.39	23.74	20.57	19.9	20.88	19.88	19.59	18.35	58.29	57.23	56.98	40.26	40.9	42.44	25.74	24.36	25.03	23.67	23.61	22.87	31.37	30.29	30.24	24.74	26.28	24.59	15.68	15.67	14.3	14.71	15.22	14.15	47.3
BnaA01G0006100ZS	0	0	0	0	0	0	0	0	0	0	0	0	0	0	0	0	0	0	0	0	0	0	0	0	0	0	0	0	0	0	0	0	0	0.15	0.35	0.68	0.17	0	0	0	0	0	0	0	0	0	0.18	0	0
BnaA01G0006200ZS	0.89	1.46	1.18	1.29	0.9	1.06	0.68	0.86	0.71	0.31	0.83	0.61	0.91	0.85	1.17	1.03	1.17	1.44	1.12	1.15	1	0.73	0.74	0.97	0.76	0.5	0.66	0.92	1.08	1.28	0.34	0.62	0.4	1.26	1.53	1.32	0.22	0.55	0.39	0.73	0.82	0.94	0.46	0.39	0.6	0.61	1	0.7	0.86
BnaA01G0006300ZS	0	0.04	0.02	0	0	0	0	0	0	0	0	0	0	0.05	0.04	0	0	0	0	0	0	0	0	0	0	0	0	0	0	0	0	0	0	0	0	0	0.09	0	0.02	0	0	0	0	0	0	0	0	0	0
BnaA01G0006400ZS	0	0	0	0	0	0	0	0	0	0	0	0	0	0	0	0	0	0	0	0	0	0	0	0	0	0	0	0	0	0	0	0	0	0	0	0	0	0.11	0	0	0	0	0	0	0	0	0	0	0
BnaA01G0006500ZS	0.01	0	0	0.59	0.85	0.46	0.17	0	0	0.12	0	0	0	0	0	0.25	0.06	0.48	0	0.05	0.4	0	0	0	0	0.16	0	0.51	0.35	1.32	0	0.12	0	0.06	0.15	0	0.09	0.03	0	0.2	0.15	0.61	0.16	0.05	0	0	0	0.03	0
BnaA01G0006600ZS	31.24	32.03	31.39	15.55	16.1	17.08	15.35	16.49	14.77	11.29	10.65	12.14	21.9	23.36	21.83	16.88	16.14	16.56	17.5	17.51	15.36	12.5	13.22	13.62	23.11	22.56	23.67	12.58	13.96	12.86	17.44	15.13	15.18	9.69	10.58	9.66	20.6	21.14	19.03	11.61	12.75	11.23	13.41	11.53	12.09	9.87	9.53	8.56	26.97
BnaA01G0006700ZS	0	0	0	0	0	0	0	0	0	0	0	0	0	0	0	0	0	0	0	0	0	0	0	0	0	0	0	0	0	0	0	0	0	0	0	0	0	0	0	0	0	0	0	0	0	0	0	0	0
BnaA01G0006800ZS	7.3	6.82	8.64	7.24	6.55	7.66	5.08	6.34	5.55	4.69	5.86	6.07	4.36	3.88	4.11	3.76	2.69	3.08	2.38	3.01	3.28	2.66	2.08	2.56	9.3	7.34	8.94	7.1	6.76	5.35	4.71	5.13	5.83	4.36	4.86	4.43	2.9	4.91	3.29	3.69	3.12	2.9	1.59	3.43	2.85	3.25	2.15	4	6.98
BnaA01G0006900ZS	0.05	0	0.05	0	0	0	0	0	0	0	0.05	0	0.05	0	0.05	0	0	0	0	0	0	0	0	0	0	0.09	0	0	0	0	0	0	0	0	0	0	0	0	0	0	0	0	0	0	0	0	0	0	0
BnaA01G0007000ZS	0.28	0.19	0.14	0	0	0.07	0.11	0.3	0	0	0.15	0	0.36	0.78	0.08	0.4	0.5	0.37	0.24	0	0	0	0	0	0.58	0.14	0.15	0	0	0	0	0	0	0	0	0	0.55	0.14	0.38	0	0	0	0	0.07	0.09	0	0	0	0
BnaA01G0007100ZS	0.11	0.2	0	0	0	0	0	0	0	0	0	0	0	0.1	0	0	0	0	0	0	0	0	0	0	0	0	0	0.06	0	0	0	0	0.07	0	0	0	0	0	0.06	0	0	0	0	0	0	0	0	0	0.06
BnaA01G0007200ZS	0	0	0	0	0	0	0.16	0.16	0.06	0.11	0.16	0.03	0	0	0	0	0	0	0	0	0	0.07	0	0.12	0.12	0	0	0	0	0	0.04	0.08	0.05	0	0	0	0	0	0	0	0	0	0	0	0	0.13	0	0.05	0
BnaA01G0007300ZS	0.12	0	0	0	0	0	0	0	0	0	0	0	0	0	0	0	0	0	0	0	0	0	0	0	0	0	0.13	0	0	0	0	0	0	0	0	0	0	0	0	0	0	0	0	0	0	0	0	0	0
BnaA01G0007400ZS	0	0	0	0	0	0	0	0	0	0	0	0	0	0.06	0	0.03	0	0	0	0	0	0	0	0	0	0	0	0	0	0	0	0.03	0	0	0	0	0	0	0	0	0	0	0	0	0	0	0	0	0.11
BnaA01G0007500ZS	0	0	0	0.18	0	0	0	0	0	0.4	0.11	0.32	0	0	0	0	0	0	0	0	0	0.12	0.15	0.16	0	0	0	0	0	0	0	0	0.09	0.23	0.34	0	0	0	0	0	0	0	0	0	0	0.04	0.19	0.25	0
BnaA01G0007600ZS	2.96	3.05	2.32	4.52	4.03	4.14	4.47	3.85	3.49	3.04	2.69	2.1	0.25	0.27	0.52	0.27	0.67	0.75	0.2	0.31	0.44	0.03	0.19	0.22	1.21	1.27	1.28	2.53	3.39	2.87	1.17	1.07	1.13	1.61	1.06	1.41	0.1	0.18	0.23	0.77	0.58	0.63	0.65	0.21	0.36	0.61	0.65	0.99	2.82
BnaA01G0007700ZS	1.3	1.1	1.01	2.09	1.45	1.86	0.19	0.57	0.27	0.25	0.19	0.22	1.11	1.27	1.09	1.22	1.29	0.91	0.25	0.31	0.78	0.08	0.18	0.44	1.3	1.33	1.51	0.87	1.26	1.11	0.17	0.26	0.26	0.18	0.32	0	0.92	0.79	0.85	0.24	0.48	0.5	0.21	0.16	0.11	0.12	0.08	0.15	0.9
BnaA01G0007800ZS	0	0	0	0	0	0	0	0	0	0	0	0	0	0	0	0	0	0	0	0	0	0	0.08	0	0	0	0	0	0	0	0	0	0	0	0	0	0	0	0	0	0	0	0	0.09	0	0	0	0	0
BnaA01G0007900ZS	23.24	28.63	24.24	89.78	88.72	88.42	16.81	19.17	20.21	2.37	3.51	3.57	47.5	43.46	49.38	43.93	44.34	47.71	27.87	30.23	22.96	5.64	5.09	5.07	160.92	152.85	168.26	59.48	57.22	51.1	27.5	30.33	22.91	6.64	7.95	7.17	61.03	66.54	61.56	28.02	28.11	29.95	42.45	31.89	34.5	8.88	5.12	6.78	13.56
BnaA01G0008000ZS	0.85	1.07	1.34	1.04	1.02	1.2	1.25	0	0	0.61	0.44	0.68	2.35	3	2.55	1.34	0.55	1.07	1.33	0.86	0.86	1.28	1.16	1.19	0.21	0.66	0.31	0.72	1.03	0.01	0.59	0.41	0.28	0	0.09	0.43	0.76	0.5	1.53	0.83	2.25	1.61	0.99	0.89	0.57	0.87	1.32	1.49	0.89
BnaA01G0008100ZS	0.74	0.29	0.19	0	0.1	0.15	1.17	0.36	0.08	0.35	0.67	0.86	0.87	0.09	0.81	1.56	0.38	0.47	0.17	0.15	0.96	0.41	0.34	0.6	0.57	0.49	0.62	0.52	1.41	1.22	0.11	0.89	0.25	0.92	0.85	0.25	1.69	0.78	0.79	0.6	0.41	0	0	0.11	0.45	0.93	0.45	0.49	1.07
BnaA01G0008200ZS	13.77	12.91	13.13	14.42	14.69	15.27	9.67	9.26	9.76	8.43	7.71	7.39	19.29	16.28	20.59	17.76	17.02	18.39	14.19	12.7	13.7	12.11	10.64	11.48	11.29	12.7	13.81	14.79	15.81	14.96	8.43	9.32	12.04	6.75	7.49	8.54	13.19	13.52	19.03	11.36	13.83	12.65	8.81	10.7	9.8	8.13	7.17	7.52	17.17
BnaA01G0008300ZS	0	0	0	0	0	0	0	0	0	0	0	0	0.12	0.11	0	0	0.08	0	0	0	0	0	0	0	0	0	0	0	0	0	0	0.04	0	0	0	0	0	0	0	0.04	0.11	0	0	0	0	0	0	0	0.09
BnaA01G0008400ZS	1.1	1.12	1.51	1.95	1.33	1.76	1.76	1.32	0.76	2.68	2.56	2.88	1.16	0.92	1.16	1.24	1.21	1.35	0.74	0.58	0.26	0.98	0.57	1.96	2.03	1.71	1.77	1.44	1.67	1.99	1.09	1.18	1.75	2.82	3.78	2.66	0.28	0.38	0.81	0.64	0.85	0.94	0.19	0.06	0.45	0.87	0.22	0.54	2.49
BnaA01G0008500ZS	0	0	0	0.28	0.26	0	1.57	0.01	0	0.21	0	0	0	0	0	0	0	0	0	0	0	0	0	0	0.14	0	0	0.27	1.29	1.45	0.06	0.62	0.46	0	0	0	0	0	0	0	0	0	0	0	0	0	0	0	0
BnaA01G0008600ZS	0	0.21	0.08	0	0	0	0	0.16	0.04	0	0.04	0	0.39	0.53	0.67	0.59	0.55	0.49	0	0	0	0.64	0.53	0.77	0.04	0.45	0.04	0.04	0.08	0.26	0.08	0.04	0	0.15	0.35	0.26	0.21	0.2	0.29	0	0	0	0	0.04	0	0.26	0.13	0.14	0
BnaA01G0008700ZS	0.38	0.43	0.27	0.03	0.04	0	0	0.04	0.05	0.05	0	0.02	1.2	1.43	1.08	0.55	0.48	0.19	0	0	0	3.62	3.47	2.73	0.2	0.16	0.42	0.29	0.28	0.14	0.13	0.13	0.14	0.83	0.74	0.61	0.76	0.65	0.66	0.09	0.15	0.11	0.02	0.13	0.14	0.58	0.88	0.76	0.88
BnaA01G0008800ZS	1.3	1.46	1.37	0.46	0.7	0.45	0.56	0.42	0.39	1	0.97	0.67	0.43	0.45	0.65	0.1	0.07	0.14	0.21	0.09	0.06	0.55	0.7	0.77	0.97	0.93	1.16	0.5	0.42	0.4	0.4	0.45	0.44	0.87	0.64	0.85	0.5	0.52	0.5	0.2	0.18	0.15	0.03	0.06	0.08	0.21	0.26	0.19	1.36
BnaA01G0008900ZS	0	0	0.18	0	0	0	0	0	0	0	0	0	0	0	0	1.15	0.16	0	0	0.01	0	0	1.08	0.63	0	0	0	0	0	0	0	0	0	0	0	0	1.2	0	0	0	0.03	0	0.64	0	0.41	0.6	0	0.01	0
BnaA01G0009000ZS	83.12	84.38	80.16	36.97	41.77	39.89	58.03	64.64	64.29	70.17	68.71	65.56	43.8	49.03	52.44	26.54	24.97	22.66	30.04	29.77	29.72	29.56	29.41	27.99	90.52	80.32	83.95	58.92	57.63	61.58	42.47	43.49	45.29	64.83	58.61	63.56	45.25	42.86	48.61	32.13	38.07	32.54	23.9	22.94	25.23	25.85	24.97	26.2	116
BnaA01G0009100ZS	5.21	5.9	3.79	1.24	1.75	4.49	0.25	0.84	0	1.43	1.78	1.41	1.72	0.39	0.83	0	0	0	0	0.52	0.48	0.28	0	0.48	5.75	5.5	7.7	3.15	3.86	4.28	2.75	2.04	1.3	2.98	1.95	2.74	1.14	0.77	0	0	0	0	0	0	0	0	0	0	3.79
BnaA01G0009200ZS	1.58	1.06	1.01	1.36	1.5	1.2	0.93	0.96	0.99	1.26	1.23	1.43	1.14	0.79	1.08	1.3	1.09	1.05	0.7	1.06	0.81	1.06	0.86	0.84	1.05	0.82	1.29	0.59	0.9	0.62	0.65	0.52	0.82	0.72	1.01	1.15	0.78	0.84	0.82	0.62	0.47	0.84	0.39	0.3	0.29	1.06	0.78	0.84	1.2
BnaA01G0009300ZS	7.45	8.07	8.31	3.17	2.33	3.46	1.78	2.36	2.16	1.44	1.55	1.83	1.48	1.27	1	1.14	1.06	0.79	0.4	0.38	0.58	0.51	0.5	0.15	9.34	9.74	11.73	1.79	1.42	2.28	2.22	2.85	2.5	1.67	1.15	0.87	3.17	2.26	1.5	0.56	0.44	0.06	0.06	0.45	0.27	0.88	0.36	0.12	8.06
BnaA01G0009400ZS	0.02	0	0.13	0	0.02	0	0	0.02	0.02	0.02	0	0	0	0	0	0.02	0.02	0.05	0	0	0	0	0.02	0	0.02	0	0	0.04	0.08	0.04	0.04	0	0.12	0	0	0	0	0	0	0	0	0	0	0	0	0	0	0	0.07
BnaA01G0009500ZS	28.2	23.61	27.5	22.91	19.19	24.55	30.39	32.72	23.4	18.77	17.77	17.64	13.23	16.46	15.48	10.21	10.23	11.56	10.78	6.92	13.05	11.51	12.45	9.35	28.31	32.41	26.15	25.86	26.77	18.01	20.07	19.78	20.7	13.54	14.26	18.35	18.37	18.22	19.32	16.41	23.17	11.4	11.55	11.36	12.01	12.22	8.03	8.52	25.51
BnaA01G0009600ZS	9	6.73	7.62	6.16	7	5.71	4.87	5.12	6.18	6.23	4.81	6.08	0.4	0.89	0.42	0.06	0.07	0.06	0	0.4	0	0.23	0.06	0.57	6.24	4.69	5.62	6.7	7.75	5.96	4.22	5.57	3.85	4.6	3.02	4.62	0	0.07	0.22	0.13	0	0.26	0	0.13	0.08	0.07	0.22	0.08	5.45
BnaA01G0009700ZS	4.2	4.51	3.79	7.55	7.26	8.22	7.45	6.51	6.4	7.19	8.57	8.56	2.85	2.93	2.8	4.07	3.58	3.2	3.45	3.1	3.17	4.02	4.54	4.69	5.21	5.96	5.33	7.77	7.78	7.69	8.36	9.09	9.45	21.96	21.86	21.84	3.42	3.21	3.28	3.98	4.3	3.94	3.3	2.71	2.87	6.64	6.7	6.35	3.41
BnaA01G0009800ZS	0.03	0	0	0	0	0	0	0	0	0	0	0	0.09	0	0	0	0	0.06	0	0	0	0	0	0	0	0	0	0	0	0	0	0	0	0	0	0	0	0	0.07	0	0.03	0	0	0	0	0	0	0	0
BnaA01G0009900ZS	5.65	6.16	6.56	6.02	6.03	5.62	11.2	10.79	10.28	15.01	11.64	12.69	2.33	2.23	2.38	4.36	3.05	3.94	5.74	4.3	4.63	10.28	10.92	13.29	8.33	7.3	7.6	20.62	18.93	18.62	18.67	19.6	20.13	12.1	14.49	14.65	5.8	5.18	4.57	12.25	12.14	10.68	5.87	5.14	5.49	7.85	7.65	6.17	7.23
BnaA01G0010000ZS	0.37	0.51	0.38	0.36	0.2	0.24	0.65	0.36	0.51	0.52	0.76	0.6	0	0	0	0.08	0	0.03	0.08	0	0.03	0.05	0.06	0.18	0.38	0.29	0.26	0.72	0.67	0.71	1.26	1.29	1.71	2.57	1.47	2.05	0	0.06	0.03	0.1	0.21	0.19	0.03	0.16	0.11	1.43	1.56	1.34	0.5
BnaA01G0010100ZS	0	0	0	0	0	0	0	0	0	0	0	0	0	0	0	0	0	0	0	0	0	0	0	0	0	0	0	0	0	0	0	0	0	0	0	0	0	0	0	0	0	0	0	0	0	0	0	0	0
BnaA01G0010200ZS	0.57	0.37	0.76	0.22	0.44	1.35	0.87	1.05	1.02	0.23	0.7	0.44	0	0.15	0	0.15	0.17	0.23	0	0.17	0	0.44	0.08	0	0.59	0.41	0.79	0.61	1.34	1.42	2	1.84	2.23	0.92	1.81	1.58	0.44	0.77	0	0.51	0	0.39	0.46	0.25	0.1	2.09	0.29	0.61	0.66
BnaA01G0010300ZS	5.43	5.86	5.35	2.43	2.84	2.73	10.17	9.29	9.93	10.45	10.69	10.79	2.32	2.59	2.25	1.47	1.53	1.45	4.02	3.52	4.75	5.34	4.97	3.87	6.12	5.9	5.58	7.52	7.22	8.39	10.34	10.24	10.19	17.7	16.99	17.35	2.86	2.42	2.99	4.88	5.31	5.32	3.35	3.91	3.71	11.25	11.67	12.11	4.33
BnaA01G0010400ZS	3.33	4.31	4.82	4.23	3.9	3.77	9.16	10.78	7.48	7.2	7.25	8.94	3	2.93	3.08	4.59	4.64	4.86	8.13	8.14	8.43	8.44	11.96	9.53	3.2	3.65	3.45	6.19	6.22	5.68	7.3	7.66	8.66	9.43	9.19	8.8	3.71	3.99	3.81	4.84	5.2	6.4	6.93	8.36	7.43	11.66	12.69	11.27	4.85
BnaA01G0010500ZS	0	0	0	0	0	0	0	0	0	0	0	0	0	0	0	0	0	0	0	0	0	0	0	0	0	0	0	0	0	0	0	0	0	0	0	0	0	0	0	0	0	0	0	0	0	0	0	0	0
BnaA01G0010600ZS	0	0	0	0	0	0	0	0	0	0	0	0	0	0	0	0	0	0	0	0	0	0	0	0	0	0	0	0	0	0	0	0	0	0	0	0	0	0	0	0	0	0	0	0	0	0	0	0	0
BnaA01G0010700ZS	7.02	6.52	5.86	14.07	12.67	12.35	6.97	7.13	7.45	6.36	5.54	5.15	1.4	1.38	2.1	2.42	2.56	1.97	1.48	1.75	1.9	2.34	1.86	1.58	4.64	4.03	4.87	10.39	10.62	12.84	6.38	7.4	7.15	2.95	3.13	3.18	1.55	1.22	1.18	2.06	2.87	2	2.5	1.8	2.16	1.81	1.53	1.49	7.11
BnaA01G0010800ZS	3.13	1.81	2.75	24.73	21.17	24.04	10.35	11.42	11.44	2.78	3.34	3.98	15.91	13.78	14.31	29.14	29.43	26.48	16.24	14.98	16.06	2.36	2.55	2.61	18.46	20.51	19.72	33.35	31.28	31.89	11.77	13.21	11.08	3.28	2.89	3.54	18.73	18.81	21.74	33.18	30.72	33.49	15.53	16.71	15.27	2.95	2.72	2.95	0.41
BnaA01G0010900ZS	0	0	0	0	0	0.03	0	0	0	0	0	0	0	0	0	0	0	0	0	0	0	0	0.03	0	0.06	0	0.03	0.03	0.03	0	0	0	0	0.06	0.32	0.21	0	0	0	0.03	0	0	0	0	0	0	0	0	0
BnaA01G0011000ZS	0	0	0	0	0	0	0	0	0	0	0	0	0	0	0	0	0	0	0.03	0	0	0	0	0	0	0	0	0	0	0	0	0	0	0	0	0	0	0	0	0	0	0.06	0	0	0	0	0	0	0
BnaA01G0011100ZS	7.74	7.28	7.52	5.51	4.24	5.06	1.72	2.01	2.57	3.26	3.6	3.38	5.44	4.7	4.59	2.89	3.32	3.15	1.58	1.85	1.95	2.18	2.09	2.82	5.6	5.4	6.87	5.51	5.76	6.27	0.92	1	0.74	1.48	1.72	1.69	4.01	3.97	2.76	2.37	2.14	2.25	1.09	1.04	0.71	0.76	0.88	0.72	6.98
BnaA01G0011200ZS	0.48	0.43	0.38	0.78	0.19	0.55	0.25	0.66	0.64	0.55	0.37	0.21	0.23	0.09	0.19	0.23	0.33	0.23	0.15	0.2	0.05	0.13	0.09	0	0.56	0.52	0.24	0.1	0.43	0.31	0.43	0.05	0.09	0.4	0.6	0.5	0.11	0.05	0.22	0.05	0.17	0.08	0.08	0	0.09	0.11	0.09	0.28	0.46
BnaA01G0011300ZS	10.91	11.14	10.88	9.57	9.63	9.95	4.13	4.78	4.14	6.14	5.64	5.48	6.72	6.08	6.6	3.43	3.89	2.63	1.86	2.01	2.02	5.18	4.66	4.75	17.01	15.88	16.86	17.05	17.33	18.3	5.64	6.07	5.73	5.66	7.17	7.09	7.56	7.61	7.71	6.87	7.21	6.61	2.39	2.41	2.77	6.55	7.08	6.73	10.81
BnaA01G0011400ZS	18.81	20.88	19.52	11.43	11.34	12.69	12.11	11.15	12.94	10.66	9.72	9.68	17.43	18.81	18.55	11.95	11.87	10.81	10.48	9.9	11.84	7.99	10.86	8.86	13.13	14.28	14.96	17.12	16.29	15.88	14.88	13.39	12.32	12.71	13.04	14.19	14.55	12.65	14.33	15.15	16.19	16.55	10.13	9.57	10.43	10.41	12.98	9.86	17.98
BnaA01G0011500ZS	16.15	13.43	17.09	25.15	24.82	19.82	10.79	15.17	11.08	27.02	31.28	31.21	19.96	18.59	18.25	18.07	17.45	18.18	9.74	9.75	9.26	17.72	14.11	17.74	26.74	25.96	28.8	24.72	21.94	20.61	27.9	32.98	30.3	151.21	147.02	147.34	24.99	23.76	25.88	12.83	15.62	11.49	9.15	7.33	8.02	57.45	55.77	55.74	19.83
BnaA01G0011600ZS	0	0	0	0	0	0	0	0	0	0	0	0	0	0	0	0	0	0	0	0	0	0	0	0	0	0	0	0	0	0	0	0	0	0	0	0	0	0	0	0	0	0	0	0	0	0	0	0	0
BnaA01G0011700ZS	0	0	0	0	0	0	0	0	0	0	0	0	0	0	0	0	0	0	0	0	0	0	0	0	0	0	0	0	0	0	0	0	0	0	0	0	0	0	0	0	0	0	0	0	0	0	0	0	0
BnaA01G0011800ZS	0	0	0	0	0	0	0	0	0	0	0	0	0	0	0	0	0	0	0	0	0	0	0	0	0	0	0	0	0	0	0	0	0	0	0	0	0	0	0	0	0	0	0	0	0	0	0	0	0
BnaA01G0011900ZS	0	0	0	0	0	0	0	0	0	0	0	0	0	0	0	0	0	0	0	0	0	0.04	0	0	0	0	0	0	0	0	0	0	0	0	0	0	0	0	0	0	0.22	0.04	0	0	0	0	0	0	0
BnaA01G0012000ZS	0	0	0	0	0	0	0	0	0	0	0	0	0	0	0	0	0	0	0	0	0	0	0	0	0	0	0	0	0	0	0	0	0	0	0	0	0	0	0	0	0	0	0	0	0	0	0	0	0
BnaA01G0012100ZS	0	0.08	0.09	0	0	0	0.1	0	0	0	0	0	0	0.09	0.2	0	0	0.17	0	0	0	0	0.09	0	0.09	0.18	0.39	0	0.3	0	0.3	0.1	0	0.09	0.11	0.21	0.21	0	0	0.1	0	0.19	0.19	0.09	0	0.32	0.43	0.23	0
BnaA01G0012200ZS	16.31	16.81	15.87	7.72	6.81	5.58	4.62	4.27	4.61	2.44	2.78	2.28	13	12.43	13.35	4.99	6.88	6.21	3.29	3.25	3.47	1.63	1.94	1.8	10.89	11.65	11	7.66	7.18	6.84	2.78	4.51	3.79	1.94	2.22	2.26	12.37	13.24	13.79	5.82	6.29	5	4.05	4.19	4.38	4.94	5.17	4.75	10.42
BnaA01G0012300ZS	0	0	0	0	0	0	0	0	0	0	0	0	0	0	0	0	0	0	0	0	0	0	0	0	0	0	0	0	0	0	0	0	0	0	0	0	0	0	0	0	0	0	0	0	0	0	0	0	0
BnaA01G0012400ZS	0	0	0	0	0	0.07	0.03	0	0	0	0	0	0.1	0	0	0	0	0	0.02	0.05	0.02	0.02	0	0.08	0.24	0.35	0.23	0.61	0.38	0.35	0	0	0	0	0	0	0.13	0.42	0.21	0.22	0.15	0.19	0	0.05	0	0	0	0	0
BnaA01G0012500ZS	0.67	0.64	0.9	0.37	0.21	0.36	2.48	2.32	2.22	2.08	2.87	2.17	0.5	0.26	0.75	0.25	0.16	0.3	0.98	1.08	1.18	1.53	1.3	1.2	0.29	0.26	0.3	0.11	0.14	0.25	2.57	2.26	2.23	4.13	4.05	4.51	0.34	0.23	0.21	0.1	0.14	0.16	0.8	0.84	1.18	5.23	5.83	4.45	0.82
BnaA01G0012600ZS	0	0	0	0.28	0.31	0.14	0	0	0	0	0	0	0.08	0.04	0	0.26	0.21	0.22	0.03	0.19	0.04	0.04	0	0	0.09	0.18	0	0.19	0.02	0.16	0.07	0.02	0.05	0.04	0	0	0.05	0.04	0.07	0.09	0.18	0.21	0.09	0.02	0.02	0	0	0	0.02
BnaA01G0012700ZS	0.22	0.36	0.38	4.67	4.91	3.69	0.55	0.44	0.35	0.09	0.13	0.07	0.38	0.3	0.22	3.6	3.94	3.79	1.11	0.82	1.1	0.22	0.07	0	0.43	0.81	0.76	3.03	3.39	2.8	0.79	0.75	0.84	0.27	0.14	0.11	0.46	0.55	0.33	2.14	2.13	1.74	1.21	0.96	1.07	0.34	0.57	0.41	0.14
BnaA01G0012800ZS	0.58	0.37	0.46	1.14	0.68	1.12	2.14	2.74	1.11	0.25	0.24	0.2	0.42	0.46	0.25	1.03	0.46	0.45	0.77	0.93	0.84	0.44	0.17	0.33	0.93	0.54	1.62	2.05	2.34	2.8	2.97	4.2	3.37	2.19	2.91	3.41	1.16	0.98	1.19	2.86	2.56	4.17	8.78	6.98	7.04	5.91	4.94	5.19	0.05
BnaA01G0012900ZS	10	9.17	7.88	9.98	10.78	11.28	8.87	6.82	6.63	5.72	6.28	6.02	20.99	21.72	20.19	16.97	18.29	17.13	13	11.86	11.41	8.43	8.83	10.18	13.05	13.01	11.2	6.43	5.2	5.66	5.42	5.5	5.99	3.74	4.37	4.23	21.2	24.32	23.17	8.25	10.06	8.5	8.17	7.55	7.2	10.6	9.11	7.16	4.5
BnaA01G0013000ZS	0.7	0.65	0.31	0.87	0.77	0.76	0.52	0.57	0.47	0.57	0.72	0.56	0.27	0.38	0.31	0.31	0.16	0.23	0.07	0.08	0.13	0.16	0.08	0.16	0.56	0.58	0.62	0.28	0.65	0.29	0.45	0.41	0.45	0.7	0.29	0.49	0.22	0.16	0.42	0.1	0.17	0.12	0.14	0.04	0.15	0.32	0.58	0.6	0.56
BnaA01G0013100ZS	0.62	0.69	0.99	1.77	2.31	1.99	0.98	1.54	0.94	1.13	0.78	0.83	0.31	0.15	0.18	1.57	1.41	1.7	0.77	0.63	0.83	0.71	0.68	0.93	0.31	0.42	0.26	1.24	0.82	1.09	0.38	0.46	0.54	0.43	0.34	0.32	0.36	0.29	0.22	1.31	1.4	1.09	0.82	0.87	0.66	0.45	0.32	0.47	0.73
BnaA01G0013200ZS	0.21	0.03	0.17	0.45	0.41	0.21	0.44	0.28	0.31	0.07	0.06	0.07	0.25	0.15	0.16	0.35	0.23	0.26	0.43	0.06	0.17	0	0	0	0.06	0	0	0.09	0	0.17	2.54	2.12	1.55	0.27	0.83	0.46	0.12	0.18	0.16	0.03	0.12	0.08	0.58	0.61	0.37	0.25	0.49	0.42	0.07
BnaA01G0013300ZS	0	0	0	0	0.06	0.13	0	0	0	0.03	0.03	0	0	0	0	0.03	0.06	0	0	0	0	0	0	0	0.08	0.03	0.03	0.03	0.09	0	0	0	0.1	0	0.1	0	0	0.06	0.03	0.09	0.03	0	0.03	0.06	0	0	0	0	0
BnaA01G0013400ZS	1.14	0.92	0.45	0.63	1.07	0.66	1.12	1.48	0.78	0.51	0.39	0.52	2.2	1.22	1.19	1.32	1.06	1.13	1.42	1.52	1.5	0.61	0.54	0.34	0.3	0.41	0.39	0.78	0.35	0.48	1.03	0.86	0.87	0.27	0.27	0.55	0.97	0.84	0.27	1.23	0.48	0.76	1.18	1.48	1.38	0.38	0.29	0.3	1.07
BnaA01G0013500ZS	6.32	6.54	5.96	7.95	8.7	8.4	15.13	15.42	14.08	11.64	11.2	11.49	3.66	3.1	2.97	4.76	4.39	4.09	6.76	6.25	7.53	4.62	4.12	5.56	4.71	6.03	5.03	6.95	7.14	6.04	13.78	15.44	13.03	7.38	8.56	6.99	2.23	2.28	1.75	5.99	4.87	5.14	6.86	7.59	6.96	7.72	7.16	6.44	3.7
BnaA01G0013600ZS	109.27	103.22	109.07	28.06	27.12	27.49	20.36	20.26	19.85	10.31	8.88	9.93	13.29	14.45	15.78	8.18	7.53	7.87	1.88	2.08	2.57	0.7	0.86	0.39	69.35	76.14	76.24	17.16	17.74	19.21	18.04	19.05	18.37	5.03	4.83	4.74	6.73	8.44	6.98	3.22	3.84	3.04	1.52	1.84	2.66	1.29	0.81	1.04	20.77
BnaA01G0013700ZS	2.6	3.74	4.84	6.88	8.64	7.97	2.51	3.9	3.6	2.19	3.09	3.32	3.77	4.19	4.27	9.9	9.54	10.02	4.61	4.2	4.73	3.17	3.09	4.06	2.65	3.06	2.71	8.71	6.45	5.83	4.47	4.42	4.23	6.47	7.32	8.19	4.55	5.21	4.55	4.99	6.07	5.52	3.73	3.85	3.37	7.53	6.46	5.79	3.18
BnaA01G0013800ZS	0.01	1	0	0.88	0	0	0.04	0	0	0	0.3	0.11	0.76	0	0.59	0	0.32	0.13	0	0.03	0	0	0.06	0	0.33	0.28	0	0	0	0	0.16	0	0	0	0.18	0.01	0	0.72	0	0	0	0	0	0	0	0.07	0	0	0
BnaA01G0013900ZS	0	0	0	0	0	0	0	0	0	0	0	0	0	0	0	0	0	0	0	0	0	0	0	0	0	0	0	0	0	0	0	0	0	0	0	0	0	0	0	0	0	0	0	0	0	0	0	0	0
BnaA01G0014000ZS	2.02	2.4	1.89	1.34	1.73	2.43	2.15	2.52	1.93	2.52	1.58	1.45	1.98	1.84	1.58	1.71	1.95	2.08	1.67	1.93	2.07	1.57	1.93	2.13	2.08	2.35	2.18	1.98	1.71	2.52	1.77	1.96	2.14	1.87	2.12	2.39	2.02	2.27	2.33	1.91	1.92	1.71	1.08	1.66	1.19	2.02	0.38	2.11	2.14
BnaA01G0014100ZS	0.85	0.68	1.02	19.23	19.27	22.17	5.8	6.81	5.07	0.35	0.63	0.98	2.86	2.31	4.64	36.17	32.33	35.62	8.91	10.32	9.84	0.33	0.97	0.87	0.91	1.32	0.72	8.35	11.74	8.81	3.35	4.47	5.22	0.95	1.15	1.4	5.51	3.08	4.85	18.34	23.99	15.94	10.49	9.82	6.6	1.43	1.08	0.64	2.61
BnaA01G0014200ZS	0.03	0.03	0.07	0.13	0.21	0.06	0	0	0.03	0	0	0.03	0.14	0.21	0.04	0.92	0.63	1.01	0.47	0.66	0.41	0.03	0	0.08	0	0	0	0.04	0.27	0.04	0.04	0.07	0.08	0	0	0.04	0.12	0.17	0	0.73	0.68	0.53	0.64	0.41	0.32	0.05	0	0	0
BnaA01G0014300ZS	0	0.15	0.31	0.36	0	1.42	0	0.01	0	0	0.07	0	0	0.1	0	0	0	0	0	0.38	0.03	0.07	0.06	0.17	0.07	0.07	0.11	0	0	0.4	0	0	0.08	0	0.32	0	0	0.28	0.23	0.07	0.36	0.33	0.18	0.22	0	0.13	0	0	0.08
BnaA01G0014400ZS	0.26	0.13	0.15	0.09	0.06	0.06	0.06	0.16	0.06	0.17	0.09	0.21	0.12	0	0.04	0	0	0	0.08	0.06	0.03	0.07	0.11	0.14	0.3	0.26	0.22	0.06	0.16	0.2	0.16	0.31	0.07	0.03	0.38	0.03	0.07	0.18	0.03	0.17	0	0	0	0.18	0	0.07	0.03	0	0.18
BnaA01G0014500ZS	78.91	75.93	79.27	0.1	0.06	0.05	0.12	0.12	0.11	0.41	0.17	0.14	29.89	24.16	25.49	0	0.57	0.05	0	0	0	0	0	0	8.58	13.42	13.04	0.12	0	0.07	0.49	0.46	0.8	0	0.25	0.07	14.81	15.78	17.5	0	0	0.22	0	0.17	0.27	0.5	0.13	0	36.53
BnaA01G0014600ZS	0.99	1.1	1.13	5.12	4.67	5.88	11.02	10.92	9.54	12.78	12.41	11.31	2.32	2	2.79	4.43	4.52	4.79	9.42	8.63	9.71	56.75	51.09	49.53	1.41	1.26	1.95	6.54	7.31	6.54	10.21	10.76	10.55	22.92	25.94	27.93	0.76	0.98	0.61	6.01	5.3	5.67	16.66	14.84	13.99	38.22	36.07	34.66	0.84
BnaA01G0014700ZS	0.18	0.25	0.45	0.07	0	0.05	0	0	0.02	0.02	0.06	0.02	0.04	0.05	0.11	0	0.02	0	0.05	0	0	0.43	0.18	0.54	0.97	0.52	0.55	0.39	0.33	0.64	0.98	1.2	0.57	0.16	0.33	0.15	0.6	0.94	0.94	0.33	0.25	0.2	0.24	0.29	0.14	0.24	0.38	0.19	0
BnaA01G0014800ZS	0	0	0	0	0	0	0	0	0	0.01	0	0	0	0	0.02	0	0	0	0	0	0	0	0.01	0	0.02	0	0	0	0	0.07	0	0	0	0	0	0	0	0	0	0	0	0	0	0	0	0	0	0	0.02
BnaA01G0014900ZS	0	0	0	0.02	0.02	0	0	0	0	0.29	0.17	0.43	0	0.02	0	0	0	0	0	0	0	0	0	0	0	0	0.02	0.19	0.31	0.13	0	0.09	0.05	2.39	2.25	3.02	0	0.07	0.07	0	0.09	0	0	0	0	0.03	0.05	0.08	0
BnaA01G0015000ZS	1.23	1.57	1.09	3.28	3.69	4.46	22.01	19.39	18.18	11.5	12.42	13.18	0.45	0.14	0.35	0.69	0.33	0.43	6.28	5.82	6.75	11.37	8.5	12.6	1.45	1.09	1.15	4.35	5.12	4.76	16.17	16.33	18	19.47	22.88	21.34	0.62	0.34	0.37	1	1.49	1.02	7.5	8.29	8.32	12.87	13.64	12.7	1.61
BnaA01G0015100ZS	4.74	4.39	4.77	10.61	10.62	11.8	5.84	5.43	5.78	8.17	8.77	7.75	9.83	9.37	9.99	13.1	13.08	13.49	2.82	3.12	3.31	9.84	9.07	9.93	8.23	7.94	7.72	45.62	46.36	43.72	53.75	53.22	52.09	26.08	26.39	24.5	21.67	22.48	23.79	45.66	52.6	48.91	35.72	35.15	34.91	60.34	58.02	57.46	2.66
BnaA01G0015200ZS	0	0	0.05	0.03	0	0	0	0	0	0	0	0	0	0	0	0	0	0	0	0	0	0	0	0	0	0	0	0	0	0	0	0	0	0	0	0	0	0	0.01	0	0	0	0	0.19	0	0	0	0	0
BnaA01G0015300ZS	0.02	0	0.02	0	0	0.05	0	0	0	0	0.23	0	0	0	0	0	0	0	0.04	0	0	0	0	0	0	0	0	0	0.03	0	0	0	0	0.24	0.54	0	0	0	0	0	0	0	0	0	0	0	0	0	0
BnaA01G0015400ZS	1.16	1.47	2.95	1.56	0	1	0.2	2.65	2.24	2.69	0.49	1.15	10.31	9.2	9.37	9.75	6.58	5.82	8.8	7.15	5.14	2.26	5.2	8.99	0.6	0.55	2.29	0.79	1.48	2.45	0.51	0.91	1.2	1.14	1.51	1.41	5.78	6.58	5.01	3.7	2.79	2.03	3.06	4.76	2.02	5.53	2.74	6.41	2.71
BnaA01G0015500ZS	0	0	0	0	0	0	0	0	0	0	0	0	0	0	0	0	0	0	0	0	0	0	0	0	0	0	0	0	0	0	0	0	0	0	0	0	0	0	0	0	0	0	0	0	0	0	0	0	0
BnaA01G0015600ZS	19.72	17.95	21.18	23.47	20.83	22.54	30.31	29.25	27.78	14.73	17.71	19.35	11.91	10.88	11.75	12.41	11.05	10.25	12.29	10.06	12.15	9.93	8.14	8.66	14.96	14.59	13.06	20.15	19.9	21.63	22.09	20.06	20.77	10.85	11.32	11.52	13.7	12.8	12.17	9.09	10.85	6.63	13.49	10.22	9.61	8.51	9.7	8.5	17.79
BnaA01G0015700ZS	0	0	0	0	0	0	0	0	0	0	0	0	0	0	0	0	0	0	0	0	0	0	0	0	0	0	0	0	0	0	0	0	0	0	0	0	0	0	0	0	0	0	0	0	0	0	0	0	0
BnaA01G0015800ZS	0	0.12	0	0	0	0	0	0	0	0	0	0	0	0	0	0	0	0	0	0	0	0	0	0	0	0	0	0.27	0	0.3	0	0	0	0	0	0.29	0	0	0	0	0	0	0	0	0	0	0	0	0
BnaA01G0015900ZS	0	0	0	0	0	0	0	0	0	0	0	0	0	0	0	0	0	0	0	0	0	0	0	0	0	0	0	0	0	0	0	0	0	0	0	0	0	0	0	0	0	0	0	0	0	0	0	0	0
BnaA01G0016000ZS	18.7	19.31	18.81	15.92	16.47	16.58	15.71	14.57	15.68	12.09	10.89	10.73	12.52	10.23	12.5	9.97	9.73	10.52	11.68	10.41	10.62	7.56	7.16	7.7	14.73	15.08	15.44	12.5	12.69	11.96	12.32	11.78	12.86	7.43	5.82	8.1	8.65	9.01	8.67	6.37	7.08	6.9	7.23	9.21	9.47	7.16	7.63	8.33	13.1
BnaA01G0016100ZS	4.47	5.22	4.87	4.67	5.93	3.73	3.43	3.73	3.02	2.37	1.85	1.55	5.62	5.5	5.92	3.12	2.51	3.46	1.53	1.26	1.67	2.1	1.24	1.1	8.83	8.71	9.14	7.24	6.33	7.8	10.89	12	12.86	15.96	17.32	20.27	10.88	12.05	9.99	3.89	3.72	3.87	6.22	5.88	7.31	6.45	5.5	7.47	5.14
BnaA01G0016200ZS	1.07	0.97	0.92	15.21	16.27	17.2	5.62	5.31	5.55	0.92	1.31	1.11	0.7	0.99	0.56	10	9.36	9.4	4.67	4.68	4.18	0.73	0.57	0.63	0.66	0.45	0.65	7.94	7.7	7.78	4.03	3.46	3.41	0.81	1.3	1.33	0.83	0.58	0.61	4.57	5.16	4.48	4.29	4.16	5.08	1.68	1.81	1.7	0.78
BnaA01G0016300ZS	0	0	0.09	2.76	2.34	1.85	0.86	0.54	0.58	0.18	0.34	0.36	0.25	0.44	0.05	7.13	7.17	8.68	3.57	4.88	3.7	0.41	0.26	0.25	0.12	0.03	0.13	0.8	1.25	0.99	0.35	0.56	0.6	3.79	4.95	5.7	0.03	0.14	0.16	5.09	3.88	4.37	2.89	3.82	2.79	5.2	4.74	4.21	0
BnaA01G0016400ZS	4.03	3.34	3.63	2.55	2.82	2.87	3.81	2.89	3.59	2.27	2.11	2	0.46	0.35	0.32	0	0.23	0.15	0.24	0	0.16	0.28	0	0.54	4.14	3.54	4.43	3.37	3.35	3.57	2.62	2.42	3.35	1.32	1.14	1.39	1.15	1.01	1.22	0.29	0.42	0.53	0.63	0.53	0.42	0.65	0.79	0.63	3.12
BnaA01G0016500ZS	0.4	1.18	0.58	0.97	0.56	0.98	0.99	1.19	1.19	0.71	0.98	1.27	1.58	0.96	1.28	0.73	0.96	0.73	0.7	0.82	0.68	0.56	0.44	0.33	0.55	1.05	0.78	0.42	0.77	0.2	1.12	1.39	0.55	1.05	2.71	2.37	1.14	1.26	1.78	0.71	1.06	0.64	0.65	0.52	0.55	1.33	1.28	1.34	0.34
BnaA01G0016600ZS	0	0	0	0	0	0	0	0	0	0	0	0	0	0	0	0	0	0	0	0	0	0	0	0	0	0	0	0	0	0	0	0	0	0	0	0	0	0	0	0	0	0	0	0	0	0	0	0	0
BnaA01G0016700ZS	0	0	0	0	0	0	0	0	0	0	0	0	0	0	0	0	0	0	0	0	0	0	0	0	0	0	0	0	0	0	0	0	0	0	0	0	0	0	0	0	0	0	0	0	0	0	0	0	0
BnaA01G0016800ZS	0	0.19	0.2	0	0	0.21	0	0	0	0.29	0	0	3.37	2.79	2.62	2.02	1.24	2.54	0.45	0	1.04	0	0	2.37	0.37	0	0.29	0	0	0.74	0	0	0	0.15	0.04	0	4.62	2	5.2	0	2.06	2.25	0	0	0	0	0	0.61	1.87
BnaA01G0016900ZS	0.16	0.08	0.53	2.77	2.59	3.38	3.53	4.63	4.18	3.1	1.71	2.06	0.42	0.64	0.28	9.07	8.82	9.81	14.77	12.07	12	5.31	6.98	7.62	0.39	0.36	0.61	4.85	5.2	3.74	4.68	3.53	4.43	2	2.48	1.59	1.05	0.63	0.79	8.38	10.92	9.38	10.28	10.84	9.07	6.7	6.99	5.36	0.18
BnaA01G0017000ZS	0.06	0.11	0	0	0.03	0	0	0	0.03	0	0	0	0.07	0	0.17	0.06	0.13	0.06	0.03	0.03	0	0.03	0.06	0	0.13	0.19	0.13	0.37	0.88	0.61	0	0.13	0.04	0.03	0.14	0	0.25	0.19	0.1	0.49	1.02	0.89	0.2	0	0.15	0.04	0.26	0.08	0.07
BnaA01G0017100ZS	0	0	0	0	0	0	0	0	0	0	0	0	0	0	0	0	0	0	0	0	0	0	0	0	0	0	0	0	0	0	0	0	0	0	0	0	0	0	0	0	0	0	0	0	0	0	0	0.11	0
BnaA01G0017200ZS	8.55	8.1	8.15	9.95	11.62	11.13	3.09	3.55	3.85	4.47	3.81	3.65	4.99	8.39	11.81	5.27	4.77	4.03	2.15	3.24	4.2	3.4	2.18	1.6	11.53	9.24	8.54	8.8	8.97	7.62	2.09	2.26	1.87	4.38	2.53	2.53	5.03	6.51	7.82	3.58	7.1	3.65	2.97	2.95	2.49	1.6	1.71	0.21	14.02
BnaA01G0017300ZS	0	0	0	0	0	0.19	0	0	0	0	0.01	0	0	0	0.45	0	0	0	0	0.06	0	0	0	0	0	1.09	0	0	0	0	0	0	0	0	0	0	0	0	0	0	0	0	0	0	0	0.3	0	0	0
BnaA01G0017400ZS	2.4	1.31	3.17	1.16	2.48	1.92	0.63	1.2	0.19	0.89	1.63	0.25	0	0	0	0.24	0	0.1	0	0	0	0	0	0	1.19	2.29	1.88	2.69	2.32	3.93	0.92	1.35	0.74	2	1.24	1.31	0	0	0.16	0	0.11	0	0	0	0	0.11	0.38	0	1.16
BnaA01G0017500ZS	0	0	0	0	0	0	0	0	0	0	0	0	0	0	0	0	0	0	0	0	0	0	0	0	0	0	0	0	0	0	0	0	0	0	0	0	0	0	0	0	0	0	0	0	0	0	0	0	0
BnaA01G0017600ZS	12.75	10.13	10.6	14.8	15.51	17.51	7.92	9.93	9.35	5.47	3.98	5.6	10.08	7.94	10.26	17.93	17.52	17.3	13.81	10.01	11.89	8.62	8.15	8.7	9.7	8.64	9.01	10.23	9.22	8.84	7.72	6.17	5	3.37	4.18	3.75	7.66	8.12	9.03	7.83	8.49	5.96	9.38	9.29	8.64	3.56	4.99	4.88	5.14
BnaA01G0017700ZS	5.45	5.24	6.06	5.18	5.62	4.57	2.54	2.36	2.53	2.65	2.18	3.02	5.99	6.13	5.98	4.67	6.12	6.55	3.33	3.59	3.8	3.91	3.05	3.46	4.58	4.58	5.06	3.79	4.39	3.88	1.81	3.04	1.95	1.74	1.94	2.59	4.79	3.68	3.72	3.91	4.28	3.34	3.26	3.03	3.24	2.67	3.17	2.15	3.56
BnaA01G0017800ZS	0	0.04	0.1	10.86	8.99	9.54	6.86	5.19	6.05	1.4	0.76	0.87	0.05	0.05	0	0.71	0	0.12	0	0.28	0.64	0	0	0	1.49	1.32	0.94	7.91	6.05	6.81	4.48	6.18	5.34	1.95	1.08	0.85	0.47	0.53	0.39	1.08	1.44	1.48	0.23	0	0.03	0.09	0	0.12	0.11
BnaA01G0017900ZS	0.1	0.25	0.03	0.23	0.11	0.03	8.81	9.3	8.24	7.98	7.96	7.69	0.23	0.2	0.07	0.89	1.05	1.22	10.79	10.38	9.79	34.79	31.16	35.48	0	0.1	0.06	0.33	0.26	0.26	6.61	6.65	7.06	10.05	9.2	9.48	0	0.03	0.09	0.94	0.3	0.42	7.11	7.69	8.42	23.52	22.41	24.7	0.03
BnaA01G0018000ZS	0	0	0	0	0	0	0	0	0	0	0.03	0	0	0	0	0	0	0	0	0	0	0.02	0	0	0	0	0	0	0	0	0.12	0.03	0.07	0	0.03	0.03	0	0	0	0	0	0	0	0	0	0	0	0	0
BnaA01G0018100ZS	0.99	1.71	1.08	2.58	1.99	2.5	3.02	3.26	3.27	2.51	2.38	2.94	2.45	1.96	2.3	3.48	4.04	4.79	5.05	5.14	5.29	3.96	3.9	4.04	1.09	1.08	1.19	3.08	2.18	2.05	2.16	1.67	1.63	1.88	1.73	1.57	3.41	2.65	3.03	4.08	3.94	2.98	4.72	4.47	4.31	3.61	3.96	4.77	1.54
BnaA01G0018200ZS	0	0	0.07	0	0	0	0	0.06	0	0.05	0.19	0	0.06	0.11	0	0.11	0.13	0.21	0.1	0.12	0	0.21	0.06	0.19	0	0.12	0	0	0.25	0	0	0	0.14	0.06	0	0	0.2	0.06	0.13	0	0.06	0.12	0.25	0	0.36	0.27	0.14	0.29	0.35
BnaA01G0018300ZS	0.46	0.33	0.2	0.45	0.81	0.6	0.59	0.56	0.54	0.61	0.58	0.65	0.25	0.34	0.48	0.96	1.03	0.83	0.6	0.88	0.74	0.57	0.55	0.46	0.34	0.25	0.43	0.71	0.65	0.73	0.33	0.39	0.43	0.37	0.35	0.49	0.55	0.44	0.79	1.09	0.84	0.72	0.56	0.6	0.78	0.44	0.47	0.26	0.18
BnaA01G0018400ZS	0.83	0.9	1.39	0.72	0.74	0.61	0.32	0.41	0.13	0.24	0.18	0.15	2.2	1.93	2.26	1.7	1.29	1.92	0.66	0.79	0.56	0.49	0.54	0.42	0.76	0.9	0.66	0.65	0.52	0.39	0.05	0.13	0.16	0.04	0.1	0.05	2.08	1.43	0.54	1.25	1.06	1.79	0.43	0.39	0.61	0.25	0.2	0.1	1.76
BnaA01G0018500ZS	0.76	0.49	0.69	0.47	0.34	1.11	0.35	0.4	0.46	0.73	0.22	0.28	2.03	3.21	2.09	1.82	1.63	2.16	0.66	1.26	0.98	0.62	1.58	1.33	1.28	0.92	1.49	0.88	0.21	0.99	0.26	0.74	0.68	0.3	0.57	0.3	2.41	2.75	1.58	2.51	2.58	2.15	0.68	1.23	1.02	1.14	0.8	0.62	0.85
BnaA01G0018600ZS	4.41	4.24	5.08	0	0	0	0	0.05	0	0	0	0	4.43	3.69	5.36	0.12	0.04	0	0	0	0	0.12	0.2	0	4.96	6.18	7.4	0.22	0.05	0.18	0	0	0.05	0	0.05	0.15	2.87	3.48	3.81	0.04	0.08	0.04	0.05	0.04	0.11	0.1	0	0.05	3.96
BnaA01G0018700ZS	0	0	0	1.07	0.77	0.78	0.93	1.21	0.93	0.02	0.07	0.02	0	0	0	0	0	0	0	0	0	0	0	0	0.02	0	0	2.32	2.84	2.78	0.57	0.81	0.56	0	0	0	0.02	0.02	0	0.3	0.19	0.1	0	0	0	0	0	0	0
BnaA01G0018800ZS	0.03	0.13	0.1	0.06	0.12	0.02	0.02	0	0.02	0.01	0.03	0.04	0.31	0.25	0.28	0.34	0.28	0.17	0.24	0.16	0.18	0.13	0.13	0.26	0.08	0.09	0.08	0.07	0.02	0.05	0.03	0.1	0	0.1	0.09	0.05	0.05	0.1	0.03	0.18	0.39	0.16	0.23	0.1	0.06	0.13	0.11	0.27	0.16
BnaA01G0018900ZS	3.81	4.81	4.82	2.3	2.78	2.03	1.65	0.94	1.64	1.08	1.48	1.11	5.1	5.17	4.66	2.8	3.54	3.45	2.56	2.36	2.75	1.48	1.9	1.63	5.7	6.57	6.2	6.73	6.52	5.95	2.96	4.12	4.8	5.15	4.89	6.42	8.85	9.9	7.28	5.49	6.11	7.03	3.99	2.93	2.78	4.94	6.11	5.52	4.39
BnaA01G0019000ZS	4.26	5.07	4.54	6.23	5.4	5.83	3.05	3.42	2.52	1.72	1.45	1.47	7.47	8.69	7.59	9.03	11.09	7.58	5.67	5.69	4.1	3.01	3.94	3.54	5.47	4.26	3.91	4.74	6.38	5.56	2.58	1.87	2.56	2.18	1.72	1.89	8.64	7.98	5.79	6	5.97	5.91	6.09	3.99	4.14	4.02	2.67	2.89	3.41
BnaA01G0019100ZS	0	0	0	0	0	0	0	0	0	0	0	0	0	0	0	0	0	0	0	0	0	0	0	0	0	0	0	0	0	0	0	0	0	0	0	0	0	0.07	0	0	0	0	0	0	0	0	0	0	0
BnaA01G0019200ZS	0	0	0	0	0	0	0	0	0	0	0	0	0	0	0	0	0	0	0	0	0	0	0	0	0	0	0	0	0	0	0	0	0	0	0	0	0	0	0	0	0	0	0	0	0	0	0	0	0
BnaA01G0019300ZS	0.13	0.17	0	0.06	0.27	0.18	0.4	1.01	1.04	0.65	0.74	0.28	0.26	0.35	0.56	0.35	0.72	0.29	0.32	0	0.33	0.22	0.29	0.21	0.13	0.56	0.67	0.2	0.55	0.22	0.21	0.54	0.31	0.96	0.36	0.79	1.62	1.61	1.59	0.46	0.56	0.77	0.4	0.32	0.39	0.36	0.37	0.39	0.44
BnaA01G0019400ZS	2.66	2.08	3.67	3.29	2.43	2.39	1.05	1.56	1.49	3.08	2.78	2.71	9.34	10.99	11.23	10.59	9.41	9.51	7.89	6.71	7.16	11.9	13.61	12.21	3.4	3.72	3.2	2.77	2.44	3.32	1.81	1.69	2.07	3.87	5.87	6.18	10.92	9.34	10.95	9.32	10.36	9.67	5.24	4.25	5.62	12.58	11.5	11.47	6.15
BnaA01G0019500ZS	0.01	0.13	0.25	0.47	1.77	1.29	1.84	1.9	2.11	1.37	1.49	2.01	0	0.08	0.15	2.47	1.42	2.52	2.36	3.17	2.35	1.79	1.82	1.56	0.03	0.22	0.21	1.01	1.03	0.47	1.32	1.71	1.95	3	3.36	3.21	0.12	0	0.14	1.12	1.04	1.4	1.91	2.14	1.45	2.77	1.61	2.12	0
BnaA01G0019600ZS	4.57	4.49	4.38	2.54	2.77	2.18	3.44	2.61	2.74	2.64	2.88	2.38	6.66	6.47	6.05	2.78	3.38	3.53	2.97	3.2	2.76	2.56	3.14	3.26	5.45	5.34	5.1	3.33	4.1	3.3	2.82	2.62	2.49	3.23	2.93	3.65	4.74	4.91	4.85	4.43	4.56	4.46	2.89	3.26	3.4	2.84	2.99	3.55	4.22
BnaA01G0019700ZS	0.74	0	0	0	0	0.16	0.42	0	0.02	0.04	0	0.79	0.7	1.47	0.16	0.97	0	0	0.12	0.68	0.22	0	2.65	0	0.68	0	0	0	0.72	0.38	0.53	0.7	0.82	0	3.76	3.45	4.79	2.15	5.16	0.34	0	0.4	1.58	0.47	0.89	10.84	7.13	4.58	0
BnaA01G0019800ZS	2.7	2.13	2.54	0.39	0.25	0.48	0.28	0.21	0.07	0.16	0	0.21	3.42	4.01	3.15	0.09	0.17	0.03	0.11	0.1	0.03	0.27	0.22	0.16	0.83	1.66	1.24	0.07	0.51	0.08	0.74	0.89	0.74	2.48	2.13	2.4	1.72	1.76	2.57	0.42	0.13	0.34	0.14	0.1	0.16	1.31	1.37	1.37	2.29
BnaA01G0019900ZS	45.69	43.63	46.83	30.58	36.41	38.51	18.31	18.69	20.49	14.76	12.81	14.2	35.38	42.62	45.8	35.22	34.41	33.01	22.54	23.78	24.03	16.8	20.19	18.14	42.31	35.76	38.61	33.92	31.71	35.53	23.39	22.26	22.83	17.26	17.92	18.36	36.59	34.29	35.83	35.27	39.69	38.25	21.71	22.09	23.3	25.55	24.61	24.5	51.22
BnaA01G0020000ZS	9.41	8	7.69	14.78	11.45	11.11	14.69	15.55	17.11	12.3	12.04	10.69	10.35	7.3	7.12	10.57	9.47	12.36	15.09	11.7	12.55	11.43	8.73	11.89	14.48	14.72	15.35	27.23	30.38	30.32	14.33	18.01	18.93	15.8	12.3	13.89	11.24	11.61	8.51	18.46	16.2	19.3	8.85	14.07	12.73	9.13	12.77	13.52	8.99
BnaA01G0020100ZS	1.83	2.05	2.36	1.36	1.04	1.1	1	1.34	1.43	0.45	0.75	1.11	2.48	2.01	2.78	0.86	1.27	1.13	0.86	0.88	0.78	1.3	1.04	1.47	2.76	3.14	3.23	0.49	0.64	0.79	1.27	1.31	1.01	1.59	0.9	1.39	1.71	2.59	2.48	0.24	0.47	0.53	0.31	0.45	0.42	0.82	0.93	0.93	1.42
BnaA01G0020200ZS	4.01	3.82	3.37	3.84	8.03	7.55	1.47	2.09	2.61	2.98	2.51	3.33	3.51	4.88	5.56	5.72	1.35	4.03	4.78	1.98	1.33	1.49	5.57	2.94	7.7	7.45	6.81	6.36	7.9	5.73	6.22	4.37	6.44	18.04	23.13	13.9	4.82	4.04	4.07	8.31	10.83	5.98	3.74	2.31	2.16	9.39	10.38	3.46	6.98
BnaA01G0020300ZS	0	0	0	0	0	0	0	0	0	0	0	0	0	0	0	0	0	0	0	0	0	0	0	0	0	0	0	0	0	0	0	0	0	0	0	0	0	0	0	0	0	0	0	0	0.03	0	0	0	0
BnaA01G0020400ZS	7.31	8.72	7.55	3.07	2.92	2.73	2.91	3.02	2.52	2.07	1.76	2.23	18.16	18.71	17.74	6.18	5.72	6.04	6.25	5.69	7.22	6.76	8.64	7.03	9.6	9.48	9.41	2.49	2.53	3.38	3.6	3.28	3.14	3.53	2.78	2.44	12.97	12.68	10.71	5.71	4.63	5.63	6.1	6.48	6.52	6.77	8.1	7.2	9.72
BnaA01G0020500ZS	0.04	0.11	0.08	0.04	0.13	0	0.22	0.14	0.21	0.04	0.09	0.26	0.04	0	0	0	0	0	0	0	0	0	0	0.03	0	0.16	0.13	0.31	0.18	0.1	0	0.09	0.15	0	0.29	0.05	0.05	0	0.23	0.05	0	0	0	0	0	0	0	0.1	0.14
BnaA01G0020600ZS	0.05	0.09	0.16	0.69	0.27	0.58	0	0	0.05	0.1	0	0.04	0.16	0.05	0.34	0.28	0.26	0.09	0.22	0	0.11	0.45	0.38	0.25	0.1	0.05	0.05	0.16	0.06	0	0.56	0.3	0.74	0.12	0.06	0	0.68	0.79	0.73	0.05	0.1	0	0.21	0.42	0.31	0.35	0.71	0.19	0
BnaA01G0020700ZS	0.76	1.49	0.9	0.87	0.54	0.89	1.35	0.54	0.62	0.39	0.09	0.58	1.99	0.89	1.63	2.25	0.62	1.25	1.21	1.03	1.3	1.05	0.88	0.26	2	1.83	1.33	2.59	1.9	2.11	2.15	2.41	2.38	1.1	0.59	1.52	1.69	2.53	2.91	2.8	1.5	1.2	2.11	0.95	1.4	0.98	1.22	2	0.73
BnaA01G0020800ZS	0.63	0.24	0.7	0.21	0.32	0.53	0.98	0.16	0.57	0.39	1.51	0.82	0.11	0.2	0	0.1	0.11	0.1	0	0	0	0.24	0.35	0.04	0.77	1.04	0.45	0.73	0.17	0.24	0.18	0.56	0.77	1.58	2.56	1.55	0.35	0.6	0.06	0.06	0	0	0.22	0.11	0.13	0	0.06	0.26	0.06
BnaA01G0020900ZS	3.1	2.41	2.87	1.55	1.54	1.64	0.84	0.85	0.84	0.43	0.61	0.74	2.49	2.62	3.23	1.4	1.19	0.73	1.21	1.44	0.9	1.5	0.96	1.06	7.73	6.43	8.71	4.59	3.78	4.56	4.98	5.55	3.79	1.12	1.27	1.78	9.58	11.03	11.37	3.46	4.52	3.77	4.06	3.64	3.39	1.91	1.42	1.46	3.63
BnaA01G0021000ZS	0	0	0	0	0	0	0	0	0	0	0	0	0	0	0	0	0	0	0	0	0	0	0	0	0	0	0	0	0	0	0	0	0	0.03	0	0	0	0	0	0	0	0	0	0	0	0	0	0	0
BnaA01G0021100ZS	0.99	1.01	0.97	0.38	1.02	0.15	1.19	1.24	0.86	0.69	1.41	0.97	4.66	4.97	7.12	3.61	3.31	3.41	1.71	1.19	1.83	1.68	1.83	2.18	1.54	1.55	0.83	0.89	1.6	0.58	0	0.01	0.05	0	0	0	2.45	3.68	4.13	3.4	2.24	2.08	2.13	2.27	1.02	0.12	0	0	3.13
BnaA01G0021200ZS	0	0	0	0	0	0	0	0	0	0	0	0	0	0	0	0	0	0	0	0	0	0	0	0	0	0	0	0	0	0	0	0	0	0	0	0	0	0	0	0	0	0	0	0	0	0	0	0	0
BnaA01G0021300ZS	13.58	13.72	15.36	11.59	14.26	10.59	12.14	10.88	11.94	7.76	5.67	7.51	13.58	12.27	14.43	11.61	10.13	9.21	8.7	8.07	7.52	8.81	8.87	7.12	16.24	14.9	14.47	12.64	16.69	14.02	9.28	10.81	10.64	13.04	16.58	13.33	13.83	13.92	11.02	14.69	13.8	12.45	8.79	8.27	9.07	14.19	12.54	13.87	15.36
BnaA01G0021400ZS	0	0	0	0	0	0	0	0.09	0	0	0	0	0	0	0.18	0	0.21	0.1	0.28	0.36	0.17	0	0.21	0	0	0	0	0	0	0.13	0	0	0	0	0	0	0	0.09	0	0	0.18	0.15	0	0	0	0	0.1	0.1	0
BnaA01G0021500ZS	0.47	0.04	0.51	0.12	0.08	0.07	0.04	0.04	0.07	0	0	0	0.66	0.49	0.14	0.16	0.23	0.28	0.07	0.17	0.04	0	0	0	0.04	0.32	0	0	0.12	0.04	0	0	0	0	0	0.01	0	0	0.26	0.05	0	0.22	0	0	0	0	0	0	0.19
BnaA01G0021600ZS	0	0	0	0.12	0.11	0.26	0.11	0.05	0	0.33	0.16	0.1	0.1	0.05	0	0.36	0.26	0.32	0	0.15	0.05	2.21	2.7	1.89	0	0	0.05	0.06	0.11	0.41	0	0.19	0.26	1.96	2.15	2.48	0	0	0	0.31	0.51	0.3	0.42	0.2	0.12	12.62	13.7	14.89	0
BnaA01G0021700ZS	0.63	0.4	0.38	0.17	0.42	0.66	14.82	16.65	13.89	23.18	25.1	26.6	2.15	1.64	1.42	2.9	2.74	3.13	13.64	12.36	12.42	34.4	41.59	29.02	0.57	0.46	0.31	1.16	1.83	0.94	18.44	21.3	22.16	14.5	13.64	16	3.87	3.24	2.86	4.55	3.37	1.56	13.85	13.86	17.27	34.38	34.13	35.97	0.38
BnaA01G0021800ZS	0	0	0	0	0	0	0.12	0.04	0	0	0	0.07	0	0	0	0	0	0	0	0	0	0	0	0	0	0.04	0.04	0	0.25	0	0	0.16	0	0	0.18	0	0	0	0.04	0	0	0	0.04	0	0	0	0.09	0	0.09
BnaA01G0021900ZS	0.55	0.91	0.7	0.64	0.53	0.59	0.23	0.16	0.31	0.49	0.58	0.45	0.83	0.21	0.51	0.36	0.48	0.51	0.21	0.4	0.25	0.89	1.02	0.94	0.55	0.41	0.54	0.36	0.36	0.42	0.16	0.2	0.14	0.9	0.91	0.54	0.46	0.59	0.61	0.59	0.56	0.51	0.1	0.27	0.07	1	0.69	1.13	1.12
BnaA01G0022000ZS	0	0	0	0	0	0	0	0	0	0	0	0	0	0	0	0	0	0	0	0	0	0	0	0	0	0	0	0	0	0	0	0	0	0	0	0	0	0	0	0	0	0	0	0	0	0	0	0	0
BnaA01G0022100ZS	0.03	0.01	0.02	0	0.02	0.01	0	0.03	0	0	0	0	0	0.03	0	0.06	0.02	0.07	0.04	0.02	0.06	0	0	0	0.03	0.08	0.06	0.02	0	0	0.07	0.1	0.04	0	0	0	0.15	0.13	0.08	0.05	0.07	0	0.03	0.12	0.06	0.03	0	0.02	0.03
BnaA01G0022200ZS	3.26	3.9	4.07	5.1	6.33	7.6	0.42	0.73	1.21	0.73	1.15	0.5	6.74	7	8.35	5.76	4.04	5.1	0.78	1.57	1.49	0.74	0.31	1.44	6.89	6.71	5.54	3.11	3.28	3.85	1.74	0.93	1.96	2.07	2.23	1.58	7.27	6.12	5.77	3.44	3.89	3.99	1.28	0.85	1.37	2.38	1.17	2.28	4.03
BnaA01G0022300ZS	0.55	0.54	0.52	0.82	0.51	0.54	0.1	0.16	0.08	0.39	0.58	0.45	0.89	0.74	0.72	0.66	0.71	0.57	0.22	0.38	0.18	0.23	0.5	0.33	0.72	0.61	0.6	0.67	0.58	0.86	0.19	0.23	0.32	0.62	0.44	0.65	0.7	0.97	0.98	0.69	0.88	0.63	0.28	0.16	0.33	0.51	0.65	0.65	0.88
BnaA01G0022400ZS	0	0	0	0	0	0	0	0	0	0	0	0	0	0	0	0	0	0	0	0	0	0	0	0	0.19	0	0	0	0	0	0	0	0	0	0	0	0	0	0	0	0	0	0	0	0	0	0	0	0
BnaA01G0022500ZS	0	0	0	0	0	0	0	0	0	0	0	0	0	0	0.1	0	0	0	0	0	0	0.16	0	0	0	0	0	0	0	0	0	0	0	0	0.1	0	0	0	0	0	0.09	0.27	0.38	0.09	0.22	2.89	1.47	0.78	0
BnaA01G0022600ZS	0.06	0.11	0.03	1.11	1.68	0.86	2.47	2.79	1.55	1.35	0.82	1.02	0.22	0.05	0.17	1.36	0.94	0.42	3.54	2.85	3.81	2.45	1.71	1.12	0	0.12	0.19	1.92	1.3	1.92	1.73	1.47	1.79	1.3	1.97	1.16	0.13	0.25	0.49	0.61	1.04	1.73	3.29	2.28	2.82	2.37	2.73	1.79	0.1
BnaA01G0022700ZS	1.12	0.36	0.59	2.32	3.41	3.66	1.24	1.21	0.67	0.75	0.05	0.5	1.56	1.56	3.21	3.94	1.32	3.24	2.7	2.65	2.4	2.32	1.14	1.21	0.57	1.28	0	0.98	1.27	0	0.53	0	0.95	0.35	1.29	0.72	2.18	2.13	3.07	1.65	2.52	1.2	0.78	1.14	0.83	1.15	1.31	0.99	0.41
BnaA01G0022800ZS	0.14	0.09	0.08	0.06	0.09	0.02	0	0.02	0	0.02	0	0.04	0.02	0.02	0.04	0	0.02	0.02	0	0	0	0	0	0	0.04	0.03	0.02	0.03	0.02	0.04	0	0	0	0.08	0.06	0	0	0	0	0	0	0	0.1	0	0.04	0.02	0.02	0	0.02
BnaA01G0022900ZS	0	0	0	0	0	0	0	0	0	0	0	0	0	0.11	0	0	0	0	0	0.06	0	0	0.18	0	0	0	0	0	0	0	0	0	0	0	0	0	0	0	0.1	0.09	0	0	0	0	0	0	0.05	0.05	0
BnaA01G0023000ZS	0.2	0.31	0.07	0.06	0	0	0	0	0	0	0	0	0.14	0.18	0.08	0	0.14	0.21	0.06	0	0	0	0.06	0.11	0.21	0.2	0.15	0.07	0	0	0	0	0	0	0.04	0	0.08	0.07	0	0.16	0	0.14	0	0	0	0	0	0	0.24
BnaA01G0023100ZS	1.5	1.91	1.66	1.74	1.46	1.28	0.7	0.99	1.11	0.99	0.85	0.69	9.31	9.32	9.29	12.42	12.6	12.97	8.73	8.81	8.83	9.74	10.1	9.87	1.73	1.74	1.2	1.39	0.89	1.83	0.73	1.18	0.66	1.45	0.99	1.18	6.77	7.58	7.8	11.37	11.86	12.22	6.32	6.39	6.51	6.7	7.12	7.19	1.71
BnaA01G0023200ZS	0.12	0.12	0.16	0.14	0.25	0.18	0.6	0.45	0.67	2	1.65	1.46	0.21	0.14	0.15	0.12	0.29	0.1	0.44	0.39	0.18	1.55	1.7	1.77	0.21	0.19	0.06	0.24	0.12	0.36	0.69	0.64	0.52	0.6	0.85	1.22	0.1	0.23	0.12	0.41	0.3	0.28	0.56	0.62	0.16	0.76	0.78	0.74	0.04
BnaA01G0023300ZS	7.73	6.92	5.56	12.31	11.14	14.23	86.25	78.71	88.89	55.97	54.53	62.99	14.48	14.17	12.39	27.14	28.27	24.75	87.06	85.22	96.67	110.02	103.65	102.96	4.43	9.36	8.28	13.12	10.86	14.38	80.04	80.92	82.4	64.05	67.77	62.17	6.59	8.03	9.66	30.31	25.11	26.72	86.69	88.71	87.04	137.02	145.11	134.86	6.62
BnaA01G0023400ZS	2.29	1.76	1.85	1.49	1.12	1.45	1.43	1.33	1.46	1.2	1.18	1.54	4.63	3.69	3.92	3.45	3.6	3.39	2.99	2.98	3.31	3.23	2.89	2.73	2.03	1.97	1.84	1.99	1.72	1.7	1.33	1.44	1.29	1.12	1.02	1.37	3.55	3.12	2.43	2.93	2.89	2.82	2.09	2.48	2.48	1.99	1.66	1.89	2.43
BnaA01G0023500ZS	0	0	0.04	0	0	0	0	0	0	0	0.04	0.03	0	0.03	0	0	0.18	0.13	0	0	0	0	0	0	0	0.04	0	0	0	0	0	0.11	0	0.07	0	0	0	0	0	0	0.07	0	0.04	0	0	0.04	0.08	0	0
BnaA01G0023600ZS	0.21	0.17	0.26	0.33	0.42	0.32	0.34	0.26	0.57	0.51	0.4	0.57	0.32	0.21	0.41	0.62	0.68	0.66	1.47	1.19	0.97	0.3	0.48	0.76	0.36	0.32	0.12	0.23	0.27	0.17	1.09	0.61	0.66	3.53	3.47	3.54	0.42	0.23	0.2	0.79	1.01	0.82	1.26	0.91	1.13	3.72	3.17	3.76	0.12
BnaA01G0023700ZS	0	0	0	0	0	0	0	0	0	0	0	0	0	0	0	0.05	0	0	0	0	0	0	0	0	0	0	0	0.33	0	0	0	0	0	0	0	0.06	0.11	0	0	0	0	0.1	0	0	0	0	0	0	0
BnaA01G0023800ZS	0	0	0	0	0	0.09	0	0	0	0	0	0	0.05	0	0	0.04	0	0	0.04	0	0	0	0	0	0	0.04	0.23	0	0.24	0.05	0	0	0	0	0	0	0.1	0	0	0	0	0	0	0	0	0	0	0	0.1
BnaA01G0023900ZS	0.5	0.25	0.44	3.39	3.35	2.98	20.36	21.96	20.34	15.82	15.49	17.14	0.31	0.32	0.3	5.76	5.81	6.2	22.49	21.8	22.67	27.68	25.51	26.16	0.53	0.41	0.1	3.08	3.31	3.11	22.6	25.35	22.68	23.43	26.49	25.52	0.36	0.37	0.19	5.73	4.56	5.37	28.22	25.7	25.9	34.71	34.27	35.65	0.35
BnaA01G0024000ZS	2.16	1.84	2.21	1.61	1.86	2	1.63	2.04	2.19	2	1.79	2.16	2.87	2.73	2.28	2.04	2.16	1.86	2.24	1.67	2.09	2.2	1.66	2.33	3.09	2.53	2.47	2.08	2.4	1.96	2.56	2.26	3.06	4.38	4.32	3.61	2.81	2.69	2.89	1.94	2.28	2.56	1.39	2.06	2.12	5.6	4.83	4.18	1.85
BnaA01G0024100ZS	13.06	13.81	12.53	12.47	12.87	13	17.06	15.29	14.84	15.36	16.35	16	13.2	14.28	13.59	14.3	14.39	13.81	15.59	14.5	14.63	17.92	18.3	17.46	9.62	9.84	9.95	14.11	12.47	13.62	12.13	13.86	13.9	10.36	11.34	11.27	10.69	9.77	11.15	13.17	11.09	11.98	13.74	12.55	13.71	11.1	14.07	12.26	9.53
BnaA01G0024200ZS	7.13	6.57	6.94	36.92	35.78	37.89	10.51	11.18	10.9	5.82	5.7	5.54	16.27	16.96	18.43	28.42	29	29.19	14.4	13.86	14.18	6.57	7.16	6.08	18.35	17.15	17.26	21.5	22.09	22.25	7.67	7.31	7.69	3.24	3.8	3.74	14.88	14.68	16.43	21.59	21.42	21.16	11.5	11.07	11.4	4.51	4.79	4.31	8.95
BnaA01G0024300ZS	0.03	0	0	0	0	0	0	0.1	0.03	0	0	0.08	0	0	0	0.05	0.09	0.13	0.08	0.28	0	0	0.03	0	0	0.03	0.06	0.19	0.06	0	0.1	0	0.07	0.06	0	0	0	0.12	0.1	0.05	0.03	0	0.17	0	0.04	0	0	0	0
BnaA01G0024400ZS	0	0	0	0	0	0	0	0	0	0	0	0	0	0	0	0	0	0	0	0	0	0.07	0	0	0	0	0	0	0	0	0	0	0	0	0	0	0	0	0	0	0	0	0	0	0.08	0.06	0	0	0
BnaA01G0024500ZS	2.36	2.36	2.14	1.75	1.35	1.72	1.71	1.41	1.32	1.39	1.42	1.48	3.36	3.36	2.78	2.71	2.26	2.14	2.19	2.16	2	2.12	2.04	2.19	1.91	2.16	2.23	1.53	1.81	2.01	1.31	1.31	1.34	0.94	1.32	1.24	2.32	2.26	2.01	2.1	2.13	2.24	1.74	1.71	1.7	1.41	1.58	1.57	1.88
BnaA01G0024600ZS	54.9	53.02	49.69	67.03	72.57	77.61	25.63	24.35	23.58	42.42	40.02	40.51	121.37	135.56	134.24	108.32	108.9	106.58	72.47	71.49	72.99	85.93	84.45	77.92	72.5	70.37	73.2	50.7	51.63	54.51	26.34	29.72	26.38	54.81	52.06	60.74	112.49	109.77	104.99	63.89	69.73	66.91	56.3	54.71	54.96	78.81	73.5	71.47	76.69
BnaA01G0024700ZS	0.23	0.19	0.13	0.21	0.18	0.07	0.01	0.01	0.01	0	0	0	0.03	0.04	0.03	0.35	0.21	0.21	0	0.04	0	0	0	0	0.07	0.04	0.15	0.09	0.19	0.15	0	0.04	0	0	0	0.02	0.03	0.03	0.02	0.14	0.15	0.2	0	0.03	0.03	0	0	0	0.06
BnaA01G0024800ZS	0	0	0	0	0	0	0	0	0	0	0	0	0	0	0	0	0	0	0	0	0	0	0	0	0	0	0	0	0	0	0	0	0	0	0	0	0	0	0	0	0	0.44	0	0	0	0	0	0	0
BnaA01G0024900ZS	0	0.07	0	0.11	0	0	0.04	0	0.25	0.2	0.04	0	0	0	0	0	0	0	0	0	0	0	0	0	0	0.23	0	0	0	0	0	0	0	0.1	0.09	0	0	0	0	0	0	0	0	0	0	0	0	0	0.05
BnaA01G0025000ZS	0	0	0	0	0	0	0	0	0	0	0	0	0	0	0	0	0	0	0	0	0	0	0	0	0	0	0	0	0	0	0	0.03	0	0	0	0	0	0	0	0	0	0	0	0	0	0	0	0	0.72
BnaA01G0025100ZS	4.03	3.57	4.25	3.07	2.89	2.14	0.77	2.06	1.54	1.03	0.97	1.93	3.19	3.79	2.44	1.88	2.01	2.08	2.25	1.91	2.19	1.45	1.2	1.24	2.99	2.93	3.36	1.52	1.51	2.22	0.98	1.62	2.1	1.04	0.98	0.52	2.81	2.35	2.59	1.05	1.7	0.7	1.12	1.25	1.18	0.87	0.59	1.31	2.37
BnaA01G0025200ZS	0	0	0	0.12	0	0	0	0	0	0	0	0	0	0	0	0	0	0	0	0	0	0	0	0	0	0	0	0	0	0	0	0	0	0	0	0	0	0	0	0	0	0	0	0	0	0	0	0	0
BnaA01G0025300ZS	0.88	0.63	0.57	0.73	0.74	0.62	0.45	0.39	0.75	0.46	0.35	0.44	1.23	1.09	1.42	1.21	1	1.39	0.99	1.01	1.28	0.73	1.14	1.5	0.39	0.38	0.51	0.53	0.41	0.27	0.27	0.47	0.59	0.43	0.4	0.41	0.56	0.44	0.42	0.71	0.82	1.43	0.72	1.1	1.23	0.36	0.74	0	0.29
BnaA01G0025400ZS	2.28	2.43	3.19	2.34	2.77	2.28	1.8	2.76	1.13	0.28	0.15	0.14	12.71	12	13.57	19.79	21.96	19.67	10.21	10.32	8.99	5.16	4.43	5.96	3.91	3.97	3.87	13.47	16.21	12.93	25.83	24.8	29.87	29.98	28.67	28.76	11.79	13.94	10.85	35.11	39.99	37.79	46.35	40.36	38.08	49.76	50.85	53.88	4.54
BnaA01G0025500ZS	8.37	5.99	7.25	17.26	21.36	20.24	7.27	7.53	8.42	4.98	5.7	6.03	10.95	11.94	11.71	16.74	15.57	13.91	7.79	7.55	8.38	3.65	3.9	7.23	36.34	31.52	31.39	78.08	80.57	70.21	19.97	19.48	21.4	67.59	73.54	73.21	31.38	33.9	30.51	54.97	65.87	52.14	20.27	16.79	18.63	27.51	26.17	25.9	13.57
BnaA01G0025600ZS	2.07	1.91	3	2.89	2.66	3.25	3.04	4	4.41	1.84	2.43	2.45	4.28	3.49	2.79	4	4.12	4.19	4.8	4.81	3.15	5.29	3.91	4.58	2.47	1.86	1.73	3	4.13	3.74	2.44	2.14	2.78	2	0.85	2.59	3.07	1.92	2.57	4.21	3.28	4.36	3.56	4.74	3.33	3.85	3.65	4.03	1.35
BnaA01G0025700ZS	3.31	5.42	4.13	4.62	3.15	2.35	0.99	3.5	0.99	0.8	1.68	1.47	4.04	5.21	4.17	4.45	3.42	3.92	3.22	4.33	3.43	1.67	3.48	2.3	1.03	2.29	3.02	3.99	5.94	4.52	3.29	3.02	2.81	2.09	1.99	2.36	5.02	5.4	3.18	4.34	3.9	3.96	1.76	1.95	1.08	1	1.39	2.86	4.04
BnaA01G0025800ZS	0.04	0.07	0.08	0.04	0	0	0	0	0	0	0	0	0.12	0.04	0.26	0	0	0	0	0	0.04	0.04	0	0	0	0	0	0	0	0	0	0	0	0	0	0	0	0	0	0	0	0.12	0	0	0.1	0.09	0	0.1	0.05
BnaA01G0025900ZS	0	0	0	0	0	0	0	0	0	0	0	0	0	0	0	0.18	0	0	0	0	0	0	0	0	0	0	0	0	0	0	0	0	0	0	0	0	0	0	0	0	0	0	0	0	0	0	0	0	0
BnaA01G0026000ZS	0.07	0	0	0	0	0	0	0.04	0	0	0	0	0.65	1.2	0.8	0.4	0.41	0.7	0.61	0.66	0.45	0.65	0.42	0.21	0.18	0.04	0.23	0.12	0.35	0.21	0.05	0	0.14	0.04	0	0	0.65	1.18	1.92	0.4	0.37	0.58	0.74	0.67	0.47	0.23	0.65	0.32	0.1
BnaA01G0026100ZS	0.81	0.61	0.24	1.26	0.69	0.77	0.55	0.65	0.59	0.2	0.21	0.13	0.95	0.85	1.07	1.51	1.12	1.13	1.58	1.86	1.38	1.37	1.07	1.91	1.03	0.48	0.31	0.96	1.27	0.8	1.4	0.89	1.22	0.64	0.27	0.51	0.31	0.85	0.42	0.8	0.84	1.41	0.9	2.02	1.09	0.75	0.45	2.61	0.66
BnaA01G0026200ZS	0	0	0	0.04	0.09	0	0	0	0	0	0.18	0.11	0	0	0	0	0	0.15	0	0	0	0.12	0.08	0	0	0	0	0.39	0.8	0.19	0.1	0	0	0	0	0.05	0	0	0	0.16	0.88	0.81	0.09	0	0.11	0	0	0.26	0
BnaA01G0026300ZS	6.81	6.46	5.05	4.49	2	4.86	4	4.11	4.22	3.99	3.58	3.4	12.37	14.54	13.37	7.26	7.78	7.63	7.29	7.46	7.24	6.49	10.19	7.27	6.79	5.85	5.61	4.41	4.07	4.59	3.26	3.44	3.32	2	2.72	2.46	11.39	11.79	10.85	8.99	8.16	8.21	5.85	6.71	6.15	4.84	5.63	5.03	7.33
BnaA01G0026400ZS	5.78	8.95	5.13	4.96	6.32	5.9	7.24	7.59	6.37	3.73	3.68	3.58	5.44	5.3	3.13	2.73	3.16	3.11	3.55	1.47	2.34	3.21	0.78	3.4	8.3	3.96	6.44	4.72	2.53	3.46	6.03	4.34	3.08	2.12	0	0.98	5.35	3.86	6.16	1.52	3.12	2.1	5.47	3.18	3.62	3.25	2.02	3.23	3.94
BnaA01G0026500ZS	4.14	4.57	4.05	6.34	6.34	6.18	4.86	5.24	5.5	3.45	4.76	4.23	4.71	6.35	5.57	4.81	4.79	4.89	3.72	5.92	2.51	3.46	4.13	5.04	11.84	11.31	9.99	9.66	9.52	8.11	8.44	7.64	9.95	6.23	7.6	7.93	9.32	11.68	9.31	6.12	5.3	5.03	3.54	6.05	5.64	6.54	5.37	6.83	3.12
BnaA01G0026600ZS	3.77	2.33	2.86	3.5	4.1	2.84	1.06	0.29	0.28	0.5	0	0	0.54	0.82	0.84	2.19	2.26	1.66	0.25	0.41	0.3	0.71	2.05	0.55	2.1	2.84	2.27	2.48	2.12	1.31	1.47	1.27	1.3	2.82	3.15	1.46	0.84	2.56	0.99	1.22	0.87	0.5	1.77	1.53	1.14	1.35	0.86	1.36	3.8
BnaA01G0026700ZS	17.17	19.22	19.51	9.07	9.86	9.42	43.07	38.78	43.66	53.16	51.37	51.67	45.66	53.41	55.81	27.97	26.56	22.88	51.35	47.77	56.35	72.86	68.64	64.25	14.78	14.57	15.88	26.26	27.23	26.86	42.5	42.54	47.53	19.64	20.01	18.11	40.32	42.33	47.82	50.95	61.68	55	54.05	55.04	53.25	58.84	57.03	59.38	24.62
BnaA01G0026800ZS	21.23	22.09	21.71	12.39	12.45	13.31	26.68	25.9	26.22	31.88	32.94	31.73	48.19	49.71	51.83	47.95	45.07	47.53	76.81	85.3	82.35	94.11	93.24	91.53	12.69	11.65	14.13	10.13	12.18	9.76	24.13	23.02	24.4	47.95	50.44	52.43	45.7	46.21	49.95	41.54	35.09	38.11	66.69	68.14	68.7	127.81	121.99	122.01	18.77
BnaA01G0026900ZS	0	0	0	0	0	0	0	0	0	0	0	0	0	0	0	0	0	0	0	0	0	0	0	0	0	0	0	0.1	0	0	0	0	0	0	0	0	0	0	0	0	0	0	0	0	0	0	0	0	0
BnaA01G0027000ZS	0	0.03	0.02	3.46	2.34	2.06	1.07	0.68	0.95	0.33	0.18	0.91	0.16	0.06	0.12	0.75	0.79	1.1	0.65	0.51	0.49	0.21	0.22	0.45	0.64	0.11	0.08	1.29	2.15	0.84	1.8	0.56	1.34	0.19	0	0.77	0.39	0.46	0.08	0.38	0.41	0.22	0.48	0.68	0.53	0.15	0	0.11	0.2
BnaA01G0027100ZS	0	0.04	0	0	0	0	0	0	0	0	0	0	0.05	0	0	0	0.19	0	0	0	0	0.08	0	0	0	0	0.05	0	0	0	0	0	0	0	0	0	0	0.14	0	0	0	0	0	0	0	0	0	0	0
BnaA01G0027200ZS	0	0.08	0.39	0.13	0.39	0	1.46	0.75	0.92	1.82	1.99	2	0	0	0.07	0.03	0.11	0	0	0.03	0.03	0.08	0	0	0.07	0.33	0.25	0.15	0.3	0.09	1.51	0.53	0.63	2.64	2.34	1.53	0.18	0.1	0.07	0.07	0	0	0.03	0.12	0	0.05	0	0.05	0
BnaA01G0027300ZS	0.91	1.08	1.13	2.66	2.58	2.55	3.59	4.42	4.69	6.57	7.1	6.57	0.84	0.68	0.75	4.5	3.16	3.68	4.75	4.69	4.84	10.1	9.85	9.64	1.55	1.63	1.53	2.92	2.91	2.75	5.15	4.61	4.55	11.27	11.2	11.5	1.41	1.37	1.18	3.42	2.56	2.9	3.64	4.17	3.95	10.04	9.25	10.1	1.61
BnaA01G0027400ZS	1.48	1.43	0.89	1.27	0.66	0.73	0.56	0.51	0.56	1.07	0.51	1.75	2.88	1.44	2.02	0.95	0.85	1.24	0.56	0.12	0.85	0.32	0.59	1.08	1.01	0.62	0.9	0.33	0.3	0.47	0.56	0.59	0	0.98	0.53	0.79	1.02	0.88	1.68	0.68	0.05	0.28	0.32	0.98	0.62	0.85	0.28	0.71	0.63
BnaA01G0027500ZS	0	0	0.22	0	0	0.43	0	0.36	0	0.25	0	0.12	0	0	0	0	0	0	0	0	0.12	0	0	0	0	0	0.45	0	0	0	0.18	0	0.1	0	0	0	0	0	0	0	0	0	0	0	0	0	0	0	0
BnaA01G0027600ZS	0.13	0	0	0.16	0.3	0.16	0.76	1.17	0.39	0.02	0.21	0.04	2.06	2.46	1.06	2.73	1.14	1.81	3.61	2.38	2.62	0	0.64	0	0	0.06	0.19	0	0	0.32	0.38	0.57	0.22	0.03	0	0	0.21	0.76	1.13	0.94	0.95	0.41	2.1	1.82	2.42	0.47	0	0.39	0.35
BnaA01G0027700ZS	0	0	0	0	0	0	0	0	0	0	0	0	0	0	0	0	0	0	0	0	0	0	0	0	0	0	0	0	0	0	0	0	0	0	0	0	0	0	0	0	0	0	0	0	0	0	0	0	0
BnaA01G0027800ZS	48.58	42.91	46.23	57.36	57.92	51.61	65.55	64.67	64.28	41.21	38.37	37.54	55.39	57.63	53.34	79.89	68.93	72.59	88.42	86.8	84.14	41.57	46.69	44.13	64.65	64.95	64.61	80.93	81.85	81.86	61.94	60.02	62.73	28.32	33.17	34.63	93.62	92.53	88.67	80.17	82.44	79.23	86.8	83.28	89.48	43.51	43.92	46.73	20.53
BnaA01G0027900ZS	1.84	1.91	1.7	6.41	8.83	9.75	2.54	3.49	2.27	2.89	2.18	2.11	2.38	2.64	2.72	8.85	6.23	6.55	3.38	3.58	1.7	1.12	0.54	0.27	5.91	5.37	8.09	15.29	12.98	12.96	2.84	3.48	5.24	2.75	2.45	3.57	5.28	6.51	5.06	15.87	20.47	15.79	3.35	3.88	5.18	1.44	2.27	3.23	1.65
BnaA01G0028000ZS	0	0	0	0	0	0	0	0	0	0	0	0	0	0	0	0	0	0	0	0	0	0	0	0	0	0	0	0	0	0	0	0	0	0	0.05	0.26	0	0	0	0	0	0	0	0	0	0	0	0	0
BnaA01G0028100ZS	0	0	0	0	0	0	0	0	0	0	0	0	0	0	0	0	0	0	0	0	0	0	0	0	0	0	0	0	0	0	0	0	0	0	0	0	0	0	0	0	0	0	0	0	0	0	0	0	0
BnaA01G0028200ZS	0	0	0	0.04	0	0	0	0	0	0	0	0	0.04	0	0	0	0	0	0	0	0	0	0	0	0.16	0	0	0	0	0	0.04	0	0.05	0.16	0.5	0.04	0.04	0	0	0	0	0	0.12	0	0	0	0	0	0
BnaA01G0028300ZS	0	0	0.04	0	0	0.07	0.08	0.12	0.08	0	0	0.03	0.08	0.1	0	0.14	0.31	0.14	0.22	0.31	0.19	0.43	0.07	0.09	0.27	0.44	0.44	0.04	0	0.09	0.12	0	0.05	0.19	0.09	0.04	0.13	0.19	0.33	0.31	0	0.04	0.16	0.19	0.05	0.04	0.09	0.14	0
BnaA01G0028400ZS	0	0	0	0	0	0	0	0	0	0	0	0	0	0	0	0	0	0	0	0	0	0	0	0	0	0	0	0	0	0	0	0	0	0	0	0	0	0	0	0	0	0	0	0	0	0	0	0	0
BnaA01G0028500ZS	0	0.1	0.03	0.02	0	0	0.12	0.23	0.11	0.46	0.54	0.31	0	0	0	0.03	0	0	0.05	0	0	0.12	0	0.04	0.06	0.11	0.09	0.32	0.27	0.44	0.15	0.32	0.13	0.94	1.13	0.99	0	0.08	0	0.03	0.06	0.03	0	0.08	0	0.35	0.33	0.51	0.03
BnaA01G0028600ZS	0	0.36	0.19	0.38	0.72	0.21	1.13	0.51	0.54	0.14	0	0.44	0.48	0.63	0.75	2.28	0.95	1.09	2.06	1.62	1.41	0.66	0.8	0.72	0.37	0.08	0.13	1.29	0.67	0.7	0.66	0.7	0.27	0	0.04	0.05	0.38	0.43	0.37	1.19	1.22	1.43	1.29	1.72	0.48	0.93	0.53	0.48	0
BnaA01G0028700ZS	0	0	0	0.83	0	0.44	0.22	0	0	0	0	0	0	0	0	0	0.15	0	0	0	0.19	0	0	0	0	0	0	0	0	0	0	0.43	0	0.96	0	0	0	0	0.2	0	0	0	0	0	0.33	0	0	0	0
BnaA01G0028800ZS	0	0	0	0	0	0	0	0	0	0	0	0	0	0	0	0	0	0	0	0	0	0	0	0	0	0	0	0	0	0	0	0	0	0	0	0	0	0	0	0	0	0	0	0	0	0	0	0	0
BnaA01G0028900ZS	0.86	1.26	0.44	0.16	0.05	0.21	0.14	0.23	0.22	0.29	0.37	0.24	0.59	2.02	1.25	0.12	0.04	0.2	0.07	0.22	0.13	0.31	0.53	0.74	0.67	0.73	0.88	0.55	0.47	0.15	0.1	0.18	0.32	0.7	0.45	0.54	0.39	1.03	0.72	0.09	0.09	0.22	0.36	0.22	0	0.25	0.46	0.54	0.9
BnaA01G0029000ZS	0.28	0.37	0.34	0.86	1.1	0.5	0.78	0.86	0.56	0.42	0.58	0.36	0.17	0.07	0.29	0.11	0.27	0.17	0.18	0.17	0.22	0.15	0.2	0.16	0.29	0.17	0.43	0.55	0.67	0.52	0.55	0.63	0.59	0.53	0.66	0.54	0.03	0.25	0.76	0.25	0.33	0.27	0.15	0.12	0.17	0.3	0.19	0.27	0.6
BnaA01G0029100ZS	0.34	0.52	0.17	0.1	0.31	0.55	0.18	0.43	0.29	0.96	0.36	0.8	0.12	0.26	0.38	0.31	0.35	0.36	0.15	0.06	0.18	0.51	0.53	0.23	0.47	0.62	0.3	0.36	0.12	0	0.19	0.24	0.56	0.58	0.07	0	0.45	0	0.06	0.24	0.39	0	0.18	0.06	0.07	0.2	0.27	0	0.13
BnaA01G0029200ZS	0.09	0.16	0.22	0	0.33	0	0.09	0.19	0.18	0.12	0.32	0.19	0	0	0	0	0	0	0	0	0	0	0	0	0.13	0	0.14	0.09	0.05	0	0.24	0.05	0.32	0.22	0	0.05	0	0	0	0	0	0	0	0	0	0	0.05	0.11	0.1
BnaA01G0029300ZS	0.73	0	2.27	0.7	0	1.38	0	1.62	1.61	0.84	0.62	1	0.06	0	2.67	1.15	0.48	0	0	0	1.2	1.19	0.83	1.42	0	0.27	0.38	0.35	1.47	0	0.08	1.36	0	1.41	0.85	1.05	0	2.06	0.48	0.71	1.27	0.31	0.37	0.77	0.18	0.23	0.41	0.01	1.26
BnaA01G0029400ZS	0.7	0.39	0.46	3.82	5.44	4.2	7.96	6.66	8.08	5.35	4.84	4.68	0.48	0.67	0.99	4.24	5.29	4.61	6.94	6.69	7.95	4.78	5.24	4.45	0.3	0.25	0.42	1.76	1.83	1.72	5.16	5.19	5.03	4.4	7.11	5.68	0.99	0.89	1.26	1.76	1.75	1.9	7.29	4.49	6.76	7.32	7.11	6.14	0.55
BnaA01G0029500ZS	0.59	0.85	1.01	2.52	1.76	2.24	2.39	3.97	1.87	2.07	3.85	4.06	2.15	2.08	2.22	1.75	1.71	1.46	1.9	2.13	1.71	3.93	4.1	3.75	4.45	3.15	4.14	3.65	5.43	5.47	2.73	3.43	1.42	7.44	6.34	6.84	3.57	2.73	3.04	2.71	3.22	3.1	2.63	2.08	2.28	4.42	5.99	6	1.07
BnaA01G0029600ZS	2.26	1.96	1.89	0.32	1.62	0	0.69	1.53	1.21	0	1.62	0.7	5.52	4.05	4.47	5.3	3.3	2.23	2.11	3.49	5.63	1.67	2.17	2.5	1.36	2.54	3.32	0	1.42	1.26	2.52	0.08	1.1	1.46	0	1.77	4.68	4.9	4.33	5.34	4.01	7.23	3.45	3.08	2.38	2.13	0	2.7	1.83
BnaA01G0029700ZS	0.25	0.28	0.35	0.3	0.37	0.22	0.36	0.16	0.23	0.11	0.05	0.04	0.12	0.15	0.1	0.04	0.09	0.04	0.06	0.04	0.25	0.18	0	0.18	0.19	0.22	0.15	0.03	0.07	0.18	0.13	0.05	0.05	0.1	0.02	0.11	0.08	0.09	0.09	0.1	0.07	0.09	0.19	0.16	0.03	0.11	0.13	0	0.3
BnaA01G0029800ZS	0.51	0.46	0.65	0	0	0.09	0	0	0	0	0	0	0.06	0.14	0.03	0	0	0.08	0	0	0	0	0	0	0.24	0.2	0.06	0.06	0.06	0	0.03	0.06	0	0	0	0	0.16	0.12	0.22	0.06	0	0	0	0	0	0	0	0.04	0.38
BnaA01G0029900ZS	1.22	1.43	1.66	1.4	1.38	1.71	1.7	0.79	1.93	0	0.67	1.42	0	0	0	0	0	0	0	0	1.2	0.57	0.29	0	1.83	0.25	1.72	0.89	0.88	1.36	0.36	0.14	0.71	0.51	0.43	0	0	0	0.48	0.87	0.57	1.66	0	0	0	0.21	0.04	0	0
BnaA01G0030000ZS	0.04	0.07	0.04	1.07	1.33	1.9	2.21	1.94	1.92	2.29	1.78	2.1	0.15	0.1	0.05	1.52	1.48	1.18	1.56	1.14	1.63	2	2.5	2.79	0.04	0.04	0.09	1.11	1.15	0.72	1.37	1.38	2.28	3.05	2.32	2.24	0.16	0.15	0.16	1.13	1.79	1.84	1.4	0.97	0.87	1.73	1.54	0.89	0.13
BnaA01G0030100ZS	0.68	0.53	0.72	0.13	0.19	0.15	0.08	0.1	0.07	0.11	0.11	0.08	0.01	0.07	0.18	0.05	0.06	0.06	0.03	0.1	0.12	0.15	0.11	0.05	0.32	0.3	0.33	0.21	0.3	0.27	0.13	0.13	0.11	0.19	0.2	0.13	0.05	0.05	0.02	0.25	0.21	0.18	0.1	0.03	0.05	0.24	0.15	0.24	0.3
BnaA01G0030200ZS	0	0	0	0	0	0	0	0	0	0	0	0	0	0	0	0	0	0	0	0	0	0	0	0	0	0	0	0	0	0	0	0	0	0	0	0	0	0	0	0	0	0	0	0	0	0	0	0	0
BnaA01G0030300ZS	0	0	0	0	0	0	0	0	0	0	0	0	0	0	0	0	0	0	0	0	0	0	0	0	0	0	0	0	0	0	0	0	0	0	0	0	0	0	0	0	0	0	0	0	0	0	0	0	0
BnaA01G0030400ZS	0	0	0	0	0	0	0	0	0	0	0	0.16	0	0	0	0	0	0	0	0	0	0.3	0	0	0	0	0	0	0	0	0	0	0	0	0	0.1	0	0	0	0	0	0	0	0	0	0	0	0	0
BnaA01G0030500ZS	0	0	0	0	0	0	0	0	0	0	0	0	0	0	0	0	0	0	0	0	0	0	0	0	0	0	0.1	0	0	0	0	0	0	0	0	0	0	0	0	0	0	0.07	0	0	0	0.13	0	0	0
BnaA01G0030600ZS	17.24	18.26	20.27	11.22	12.96	12.22	2.4	1.47	1.77	0.66	2.24	1.72	16.09	14.19	11.92	5.67	3.87	3.01	0.6	1.22	0.49	1.39	1.31	0.58	21.5	20.95	21.59	12.52	11.45	9.28	2.16	3	2.79	1.27	1.99	1.59	11.55	11.49	14.11	7.04	6.93	6.62	2.3	2.37	2.15	0.54	0.82	0.78	21.23
BnaA01G0030700ZS	22.48	23.85	22.1	14.19	14.48	11.58	13.32	14.45	13.43	9.33	9.94	10.81	15.63	16.67	17.08	11.03	11.04	10.24	10.87	10.46	11.54	8.9	9.51	9.97	52.39	52.4	48.98	26.12	23.95	25.23	15.28	13.95	16.8	11.99	11.47	12.58	31.36	30.92	28.41	17.79	16.77	16.68	11.48	11.64	12.11	8.39	10.29	9.43	22.41
BnaA01G0030800ZS	12.38	13.05	13.89	60.61	63.26	61.79	20.39	19.76	21.98	20.64	18.92	19.19	8.69	10.63	10.79	23.03	25.3	24.97	14.02	5.56	13.69	10.79	9.22	10.85	37.24	33.08	35.16	31.98	31.32	31.36	14.69	18.04	17.47	31.97	31.27	29.55	20.95	20.6	22.36	12.04	15.02	14.73	9.47	7.47	12.92	15.67	12.21	11.77	11.12
BnaA01G0030900ZS	0.36	0.42	0.16	0.09	0	0.34	0.3	0	0.51	0.05	0.36	0.42	0.19	0.08	0.48	0	0.12	0.18	0	0.09	0.08	0.24	0.35	0.67	0.16	0.54	0.47	0.12	0.22	0.45	0.49	0.18	0.42	1.07	0.45	0	0.06	0.1	0.09	0.29	0.09	0.24	0.19	0.15	0.09	0	0	0	0.08
BnaA01G0031000ZS	0.45	0.44	0.35	0.65	0.28	0.4	0.18	0.16	0.14	0.06	0.05	0.04	0.29	0.51	0.42	0.33	0.35	0.49	0.45	0.28	0.35	0.23	0.21	0.1	0.41	0.26	0.29	0.27	0.35	0.31	0.12	0.05	0.11	0.06	0.16	0.07	0.3	0.38	0.31	0.17	0.21	0.22	0.16	0.24	0.27	0.04	0.1	0.03	0.67
BnaA01G0031100ZS	0.69	0.93	0.81	0.63	0.15	0.18	0.21	0.36	0.78	0.19	0.32	0.68	0	0	0	0	0	0	0	0	0.38	0.29	0.09	0	1.18	0.6	0.67	1.21	0.64	0.12	0.13	0.52	0	0.21	1.32	0.34	0.27	0.12	0	0.12	0.56	0	0.25	0	0.11	0.1	0.1	0	0.67
BnaA01G0031200ZS	0.15	0.87	0.45	0.4	0	0.21	0.31	0.08	0	0.07	0.31	0.13	0	0.14	0.16	0.2	0.3	0.07	0.37	0.08	0.23	0.19	0.07	0.42	0.52	1.09	1.11	1.23	0.48	0.42	0.16	0.56	0.36	0.37	1.17	0.75	0.65	0.45	0.32	0	0.36	0.07	0.46	0.68	0.45	1.6	1.35	1.53	0
BnaA01G0031300ZS	2.73	1.86	2.19	2.23	2.56	2.55	3.12	3.24	3.72	4.1	2.84	3.71	2.44	2	1.71	2.08	2.12	2.24	2.31	1.95	2.23	2.31	2.75	2.61	2.84	2.93	3.07	5.74	6.2	5.39	4.48	5.14	5.32	7.79	7.38	8.64	1.95	2.13	2.29	3.9	4.45	3.6	2.12	2.5	2.21	7.1	7.57	6.95	2.02
BnaA01G0031400ZS	0.74	0.52	0.58	5.05	5.22	4.66	1.79	2.39	1.76	2.01	2.24	2.67	2.81	2.51	2.04	4.34	4.01	3.88	2.34	2.43	2.49	2.46	2.52	2.06	3.67	2.82	2.85	7.51	6.86	7.39	2.15	3.36	1.84	3.46	4	4.4	3.14	2.65	2.77	6.84	5.12	6.55	2.33	2.52	2.36	4.93	3.41	4.59	0.36
BnaA01G0031500ZS	0.48	0.45	0.46	0.22	0.33	0.39	1.04	1.24	0.95	2.19	2.4	1.8	0.11	0.19	0.13	0	0	0	0	0	0.06	0	0	0	1.79	1.28	1.29	0.84	0.92	0.92	0.93	0.77	0.89	2.82	3.11	2.51	1.12	0.64	0.97	0	0	0	0.29	0.17	0.61	0.34	1.12	0.45	0.05
BnaA01G0031600ZS	0	0	0	0	0	0.35	0	0	0	0	0	0	0	0	0	0	0	0	0	0	0	0	0	0	0	0	0	0	0.1	0	0	0	0	0	0	0	0	0	0	0	0	0	0	0	0	0	0.21	0	0
BnaA01G0031700ZS	76.46	78.13	79.31	123.13	124.67	128.82	81.41	80.27	82.4	63.68	64.92	61.28	99.84	106.65	106.26	115.25	109.92	111.86	96.11	90.87	88.26	66.54	69.43	72.35	105.66	111.66	104.88	116.41	119.72	113.19	60.62	56.09	60.36	42.9	37.95	41.63	111.64	107.84	112.68	108.84	120.28	112.21	82.75	78.62	79.63	49.47	49.61	48.88	48.67
BnaA01G0031800ZS	0	0	0	0.17	0	0.09	0	0	0	0	0	0	0	0	0	0	0	0	0	0	0	0	0	0	0	0	0	0	0	0	0	0	0	0	0	0	0	0	0	0	0	0	0	0	0	0	0	0	0
BnaA01G0031900ZS	0.25	0.15	0.19	0.13	0.05	0.1	0.54	1.16	0.69	0.11	0.12	0.18	0.12	0.21	0.33	0.13	0.05	0.17	0.2	0	0.05	0.16	0	0	0.57	0.37	0.42	1.33	1.19	1.05	1.8	2.16	1.78	0.89	0.93	0.97	0.33	0.41	0.38	0.49	0.44	0.48	0.53	0.59	0.48	1.07	0.92	0.85	0.05
BnaA01G0032000ZS	9.61	8.75	10.38	6.32	7.84	6.83	8.07	6.02	7.44	9.55	8.6	9.09	7.5	7.04	7.41	8.36	8.02	7.22	8.4	6.78	7.85	8.18	9.29	9.38	6.04	6.77	8.01	6.72	5.39	7.92	8.82	7.07	7.48	14.64	11.72	13.29	4.53	5.84	5.71	5.24	7.15	5.31	6.11	6.01	7.27	8.5	11.55	8.86	7.81
BnaA01G0032100ZS	0.46	0.1	0.15	0.27	0.2	0.26	0.27	0.13	0.14	0.28	0.23	0.36	0.17	0.11	0.07	0.11	0.17	0.07	0.2	0.07	0.1	0.29	0.16	0.18	0.15	0.27	0.11	0.11	0.16	0.08	0.15	0.3	0.17	0.21	0.3	0.2	0.2	0.22	0.24	0.08	0.19	0.11	0.13	0.04	0.1	0.37	0.24	0.35	0.44
BnaA01G0032200ZS	0.35	0.18	0.3	0.14	0.03	0.04	0	0	0	0	0	0	0.05	0	0	0	0	0	0	0	0	0.06	0	0	0.18	0.12	0.3	0.13	0.15	0.07	0	0.03	0	0	0.02	0.11	0.14	0.18	0.07	0	0	0	0.02	0	0	0.02	0	0.04	0.07
BnaA01G0032300ZS	0.11	0.12	0	0.77	0.26	0.44	0.56	1.02	0.75	1.36	1.54	1.21	0	0.1	0	0.33	0.55	0.1	0.77	0.31	0.77	0.69	0.69	0.52	0.05	0	0.19	0.54	0.35	0.37	1.55	1.97	2.2	4.52	3.91	3.08	0.05	0.27	0.19	0.32	0.82	0.15	0.79	0.68	0.2	2.64	3.99	2.41	0.1
BnaA01G0032400ZS	1.57	2.81	1.63	8.36	7.75	9.77	7.84	9.6	10.05	5.93	5.46	5.08	1.63	1.81	1.23	5.5	4.42	4.85	6.37	5.35	4.67	3.13	2.52	4.58	1.77	1.65	1.72	11.54	13.63	14.02	8.9	10.98	10.69	11.59	14.88	13.82	1.23	1.96	0.95	5.08	6.84	3.39	5.12	6.07	4.52	16.15	16.31	15.89	2.45
BnaA01G0032500ZS	0	0	0	0	0	0	0	0	0	0	0	0	0	0	0	0	0	0	0	0	0	0	0	0	0	0	0	0	0	0	0	0	0	0	0	0	0	0	0	0	0	0	0	0	0	0	0	0	0
BnaA01G0032600ZS	0.02	0	0	0.22	0	0.05	0.01	0.05	0.09	0	0.29	0.48	0.09	0.02	0	0	0.03	0.04	0.16	0	0.15	0.72	0.68	0.85	0.09	0.04	0	0	0	0	0	0.51	0.77	5.82	6.75	9.3	0.05	0	0.06	0	0	0	0.13	0	0	1.99	2.54	1.89	0.03
BnaA01G0032700ZS	10.9	10.74	11.05	4.36	3.74	4.5	4.99	3.68	3.81	4.85	4.23	4.39	7.23	8.14	7.62	5.21	5.14	4.6	4	3.66	3.97	6.98	6.23	6.03	6.73	6.71	7.21	2.74	3.01	2.55	4.18	3.76	3.9	7.85	8.79	7.77	4.71	5.81	6.2	3.04	3.65	4.88	1.99	2.79	2.9	6.31	7.1	6.37	7.27
BnaA01G0032800ZS	0.06	0.11	0.19	0.45	0.87	0.66	0	0.07	0	0.06	0.33	0	0	0	0	0	0.06	0.06	0	0	0.06	0.22	0	0	0.3	0.37	0.6	0	0.34	0.29	0.14	0	0.31	0.32	0.26	0.07	0	0	0	0	0	0.06	0	0	0	0	0.15	0.08	0
BnaA01G0032900ZS	0	0	0	0	0	0	0	0	0	0	0	0	0	0	0	0	0	0	0	0	0	0	0	0	0	0	0	0	0	0	0	0	0	0	0	0	0	0	0	0	0	0	0	0	0	0	0	0	0
BnaA01G0033000ZS	0	0	0	0	0	0	0	0	0	0	0	0	0	0	0	0	0	0	0	0	0	0	0	0	0	0	0	0	0	0	0	0	0	0	0	0	0	0	0	0	0	0	0	0	0	0	0	0	0
BnaA01G0033100ZS	0	0	0.02	0.1	0.07	0.17	0	0.26	0	0.03	0.07	0.06	0	0.02	0.02	0	0	0.1	0.18	0	0	0	0.14	0	0	0	0	0	0	0.03	0	0.09	0.24	0	0	0	0	0	0	0	0.09	0.02	0	0	0	0.06	0	0.08	0
BnaA01G0033200ZS	0.91	0.21	0.34	0.73	0.33	0	0	0.61	0.3	0.02	0	0	0.55	0.55	0.12	1.16	1.53	1.19	0.53	1.56	1.15	0.1	0	0	0.76	0.06	0.65	0	1.15	0.16	0	0.29	0.16	0.3	0.44	0	1.35	1.06	0.53	1.8	0	0.53	0.1	0.87	0.7	0.09	0	0.17	0
BnaA01G0033300ZS	0	0	0	0	0.05	0.02	0	0	0	0	0	0	0	0	0	0	0	0	0	0	0	0	0	0	0	0	0	0	0	0	0	0	0	0	0	0	0	0	0	0	0	0.02	0	0	0	0	0	0	0
BnaA01G0033400ZS	0	0	0	0.06	0	0	0	0	0	0	0	0	2.63	1.97	1.71	0.96	0.91	0	0.19	0.35	0.09	1.13	0.59	0.57	0.2	0.97	0.84	0.17	0.12	0	0.08	0	0	0	0	0	3.25	2.11	3.57	0.5	0.54	1.09	1.63	1.2	1.39	0.13	0.28	0.75	0
BnaA01G0033500ZS	0.47	0	0.46	0.32	0	0	0	0	0	0	0	0	0	0	0	0.35	0.14	0	0	0	0	0	0	0	0.24	0	0.19	0	0	0	0	0	0	0	0	0	0	0	0	0	0	0	0	0	0	0	0.03	0	0.39
BnaA01G0033600ZS	1.22	1.1	0.9	1.08	0.42	0.67	0.59	0.95	0.52	0.77	0	0.22	0.8	0.4	0.52	0.52	0.29	0.15	0.53	0.72	0.09	0.37	0.08	1.02	0.14	0.78	0.86	0	1.02	0.22	0.12	0.02	0.15	0	0.27	0.18	0.53	0.42	0	0.35	0.13	0.35	0.44	0.52	0.33	0.17	0	0.11	0.3
BnaA01G0033700ZS	27.03	26.33	26.79	26.95	26.42	28.96	33.83	31.28	34.91	23.72	23.16	22.46	39.53	43.66	44.37	22.39	21.73	23.72	16.41	13.81	15.12	14.37	15.09	15.72	33.52	30.91	32.16	16.36	15.1	14.78	8.56	8.14	9.35	7.23	7.2	6.85	69.61	72.6	76.38	15.07	17.39	16.04	12.23	12.32	11.41	2.75	3.54	3.35	14.13
BnaA01G0033800ZS	0.31	0.35	0.32	0	0	0	0.05	0	0	0.03	0.02	0	0.1	0.17	0.2	0	0.09	0.05	0.04	0	0	0	0	0	0.17	0	0.12	0	0.14	0.06	0.02	0.02	0.08	0.1	0.1	0	0.15	0.1	0	0.02	0.02	0.01	0	0	0	0	0	0.04	0.19
BnaA01G0033900ZS	0.04	0.1	0	0	0.09	0	0	0	0	0	0.21	0.07	0.07	0.04	0.54	0.07	0	0	0	0.04	0	0.06	0.03	0.03	0	0	0.04	0.04	0	0	0	0.1	0	0	0	0	0	0.1	0	0	0	0	0	0	0	0.04	0.14	0.14	0.25
BnaA01G0034000ZS	0	0	0	0	0	0	0	0	0	0	0	0	0	0.03	0	0	0	0	0	0	0	0	0	0	0	0	0	0	0	0	0	0	0	0	0	0	0	0	0	0	0	0	0	0	0	0	0	0	0
BnaA01G0034100ZS	0	0	0	0	0	0	0	0	0	0	0	0	0	0	0	0	0	0	0	0	0	0	0	0	0	0	0	0	0	0	0	0	0	0	0	0	0	0	0	0	0	0	0	0	0	0	0	0	0
BnaA01G0034200ZS	0	0	0	0	0	0	0	0	0	0	0	0	0	0	0	0	0	0	0	0	0	0	0	0	0	0.03	0	0	0	0	0	0	0	0	0	0	0	0	0	0	0	0	0	0	0	0	0	0	0
BnaA01G0034300ZS	0	0	0	0	0	0	0	0	0.12	0	0	0	0	0	0	0	0	0	0	0	0	0	0	0	0	0.23	0	0	0.26	0	0	0	0	0.24	0	0	0	0	0	0	0	0	0	0	0	0	0	0	0
BnaA01G0034400ZS	5.09	4.72	5.06	5.27	4.34	4.4	6.25	5.06	5.95	6.17	7.06	6.52	3.74	5.09	3.65	6.2	6.09	6.34	8.19	8.22	7.89	10.93	12.11	10.52	6.63	7.42	7.03	5.57	6.34	5.98	6.02	5.32	6.21	5.99	5.72	5.46	5.71	7.16	5.93	6.42	6.74	6.65	8.63	7.84	8.29	7.03	8.07	8.25	3.78
BnaA01G0034500ZS	0	0	0.03	0.08	0.03	0	0	0	0	0.03	0	0.02	0	0.05	0.03	0.16	0.06	0.13	0.02	0	0.03	0.05	0.08	0.07	0.03	0	0	0.06	0.09	0.16	0.06	0.06	0	0.09	0	0.03	0	0.06	0	0.06	0	0.03	0.03	0	0.03	0.07	0	0	0
BnaA01G0034600ZS	1.37	1.42	1.54	1.49	1.54	1.18	0.77	0.58	0.57	0.23	0.21	0.27	1.05	0.72	0.96	1.13	1.32	1.35	0.61	0.67	0.72	0.12	0.15	0.24	0.83	1.12	0.76	1.68	1.29	1.4	0.59	0.65	0.45	0.66	0.54	0.39	0.54	0.78	0.83	0.7	0.76	0.71	0.67	0.74	0.48	0.32	0.33	0.5	0.84
BnaA01G0034700ZS	0.42	0	0	0.45	0	0.2	4.68	2.56	3.16	2.19	4.5	3.28	0	0	0.23	0.68	0.22	0	0.9	1.43	0.34	2.73	2.19	2.47	0.22	0.42	0	0.59	0.46	0.24	1.17	1.24	1.62	0.21	0	0.24	0	0	0	0	0	0.54	1.03	1.55	0.41	0.79	0.62	0.66	0.18
BnaA01G0034800ZS	0.47	0.76	0.24	0.43	0	1.03	0.51	0.13	0.74	0.56	0.76	0.74	0.25	0.44	0.93	2.84	2.37	4.12	2.78	4.26	4.28	3.94	3.45	2.43	0	0	0	0.13	0.39	0	0.13	1.14	0.15	1.21	0.55	0.54	0.53	0.5	0.13	3.07	1.66	2.47	4.08	2.98	3.82	1.1	1.54	2.08	0.83
BnaA01G0034900ZS	0	0	0	0	0	0	0	0	0	0	0	0	0	0	0	0	0	0	0	0	0	0	0	0	0	0	0	0	0	0	0	0	0	0	0	0	0	0	0	0	0	0	0	0	0	0	0	0	0
BnaA01G0035000ZS	0	0	0	0	0	0	0	0	0	0	0	0	0	0	0	0	0	0	0	0	0	0	0	0	0	0	0	0	0	0	0	0	0	0	0	0	0	0	0	0	0	0	0	0	0	0	0	0	0
BnaA01G0035100ZS	0	0	0	0.46	0.11	0.56	1.13	0.56	0	0.1	0	0	0	0	0	0.38	0.11	0	0.44	0.43	0.11	0	0.1	0	0	0	0	1.18	0.54	0	0.42	0	0.25	0	0	0.23	0	0	0	1.83	0.71	0.63	0.11	0.64	0.63	0	0	0	0
BnaA01G0035200ZS	0	0	0	0	0	0	0	0	0	0	0	0	0	0	0	0	0	0	0	0	0	0	0	0	0	0	0	0	0	0	0	0	0	0	0	0	0	0	0	0	0	0	0	0	0	0	0	0	0
BnaA01G0035300ZS	0	0	0	0	0	0	0	0	0	0	0	0	0	0	0	0	0	0	0	0	0	0	0	0	0	0	0	0	0	0	0	0	0	0	0	0	0	0	0	0	0	0	0	0	0	0	0	0	0
BnaA01G0035400ZS	14.62	12.12	14.32	1.6	1.74	1.04	0.65	0.33	0.48	0.58	0.25	0.48	2.9	5.09	4.34	0.28	0.16	0.14	0.07	0.24	0.48	0.41	0.14	0.06	4.61	5.28	5.81	1.88	1.17	0.62	0	0.16	0.57	1.02	1.87	2.01	2.99	2.15	2.29	0.64	0.15	0.86	0.65	0.24	0.57	0.18	0.36	0.57	8.27
BnaA01G0035500ZS	0	0	0.03	0	0	0	0	0	0	0	0	0	0	0	0	0	0	0	0	0	0	0	0	0	0	0	0	0	0	0	0	0	0	0	0	0	0	0	0	0	0	0	0	0	0	0	0	0	0
BnaA01G0035600ZS	14.68	14.84	14.67	16.9	18.07	19.16	6.39	6.87	6.38	7.04	7.66	6.22	8.6	9.28	8.53	9.98	9.23	9.38	4.32	4.61	4.61	4.71	4.89	5.27	20.55	18.73	19.2	9.9	8.79	10.85	7.16	6.81	6.38	15.84	15.77	14.28	12.34	12.23	11.95	5.68	6.16	5.58	4.55	4.24	3.81	11.42	12.64	11.59	15.15
BnaA01G0035700ZS	0.05	0.05	0.07	0	0.02	0	0	0	0	0	0	0	0.05	0	0	0	0	0	0	0	0	0	0	0	0	0	0.05	0	0	0	0	0	0	0	0	0	0.04	0	0	0	0	0.02	0	0	0	0	0	0	0.04
BnaA01G0035800ZS	2.8	2.93	3.15	0.32	0.36	0.34	0.04	0.05	0.14	0	0	0	0.34	0.17	0.35	0.15	0.06	0.13	0.07	0.07	0	0.05	0	0	0.16	0.31	0.23	0.2	0.4	0.29	0.17	0.11	0.17	0.12	0.08	0	0.15	0.32	0.19	0.04	0.19	0.17	0	0.02	0.02	0.22	0.06	0.11	2.62
BnaA01G0035900ZS	2.74	1.75	4.22	2.47	2.99	2.9	0.92	2.3	1.98	1.7	1.58	1.85	3.78	3.1	2.6	1.38	1.29	0.64	2.02	1.33	1.55	2.44	1.47	1.25	2.39	3.33	4.55	0.83	1.01	0.85	1.61	1.3	2.36	0.88	1.68	2.28	1.3	3.14	1.95	1.28	2.49	1.21	0.77	2.85	1.58	0.53	1.62	0.77	3.39
BnaA01G0036000ZS	0.6	0.18	0.54	3.11	4.1	3.59	4.98	5.2	5.22	2.38	2.2	2.47	0.04	0	0.09	0.08	0.04	0.07	0.18	0.04	0.21	0.07	0.08	0	0.33	0.64	0.9	2.95	2.15	3.88	4.35	4.08	3.89	1.97	1.97	1.38	0.05	0.08	0.09	0.72	0.72	0.5	0.77	0.42	0.69	2.1	1.86	2.13	0.33
BnaA01G0036100ZS	23.59	23.73	21.54	36.75	34.32	36.33	14.2	15.85	14.03	22.98	21.85	21.2	21.11	23.54	20.62	22.64	20.65	20.42	13.8	14.43	15.11	11.75	10.63	12.3	25.2	23.32	23.6	18.1	18.69	19.32	13.17	10.19	11.01	25.77	23.74	25.89	18.57	16.71	16.9	14.4	12.73	13.33	9.11	9.22	9.5	13.56	8.93	10.87	18.18
BnaA01G0036200ZS	1.08	1.31	1.22	1.04	1.05	0.38	0.57	1.1	0.59	0.63	0.49	0.41	1.61	2.84	2.53	1.41	1.88	1.95	1.45	1.4	1.42	0.89	0.95	1.36	0.82	1.41	1.12	1.09	0.99	1.14	0.3	0.36	0.56	0.46	0.63	0.51	1.75	2.12	2.93	1.53	1.57	1.4	0.76	0.95	0.76	1.11	0.98	0.57	1.31
BnaA01G0036300ZS	0.03	0.02	0.08	0.69	0.21	0.27	1.51	0.95	1.13	2.66	3.29	2.07	0.02	0.02	0	0.3	0.79	0.47	0.69	0.96	1.44	2.68	2.8	2.93	0	0.15	0.07	1.34	1.29	1.15	1.49	1.68	1.26	2.91	2.72	2.93	0.02	0.04	0.07	2.01	1.51	1.94	1.72	1.07	1.2	6.9	6.2	6.2	0
BnaA01G0036400ZS	33.72	28.3	32.11	15.89	23.58	19.33	6.93	7.11	7.08	6.65	2.96	6.43	149.93	145.08	176.02	90.65	89.46	80.32	50	45.98	49.67	44.83	42.91	40.2	35.66	31.33	33.74	36.68	38.3	42.74	24.28	24.14	32.41	13.37	14.54	14.74	109.63	105.48	118.01	77.55	89.07	84.8	66.92	68.17	70.46	30.3	31.31	31.31	57.52
BnaA01G0036500ZS	9.3	9.3	10.8	9.65	9.59	12.33	3.78	4.22	4.69	5.34	6.01	6.87	1.4	2.21	1.68	2.34	2.07	1.56	1.12	1.04	1.3	2.4	0.67	0.72	9.33	7.81	7.46	13.76	11.83	8.05	3.68	2.95	3.72	7.67	5.48	4.46	3.24	3.37	3.09	2.72	2.19	2.94	1.58	1.01	0.62	4.81	3.15	2.46	7
BnaA01G0036600ZS	0	0	0	0	0	0	0	0	0	0	0	0	0	0	0	0	0	0	0	0	0	0	0	0	0	0.15	0	0	0.16	0	0	0	0	0	0	0	0	0	0	0	0	0	0	0	0	0	0	0	0
BnaA01G0036700ZS	3.49	4.36	5.04	14.09	13.61	14.53	10.74	10.98	10.41	4.89	5.24	4.1	0.26	0.23	0.28	0.73	0.89	0.46	0.54	0.32	0.58	0.06	0.57	0.15	3.51	4.68	4.4	8.42	7.83	8.53	6.44	7.27	7.35	2.44	3.16	3.7	2.22	1.56	1.13	2.08	1.77	1.84	1.43	1.53	2.36	1.52	0.8	1.82	2.92
BnaA01G0036800ZS	0	0	0	0	0	0	0.02	0	0	0.03	0	0.05	0	0	0	0.02	0	0	0	0.02	0	0.07	0	0	0	0.02	0	0	0	0	0.13	0.03	0.12	0	0	0.02	0	0	0	0.02	0	0	0	0.03	0	0	0	0	0
BnaA01G0036900ZS	2.78	1.09	3.5	5.4	2.86	0.26	1.35	0	1.98	2.63	1.52	2.39	8.3	8.21	10.36	7.52	8.04	8.73	7.02	7.55	7.61	5.23	4.63	4.83	2.3	0.09	2.12	0.33	1.9	1.77	1.66	3.51	2.96	1.4	2.13	1.98	4.18	6.73	4.33	6.71	4.26	6.17	4.69	3.57	2.52	3.64	2.77	2.13	2.6
BnaA01G0037000ZS	0	0.1	0.05	0	0	0	0	0.06	0	0	0	0	0.27	0.05	0	0	0	0	0	0	0	0	0	0	0	0.05	0	0.11	0.06	0.06	0.06	0.06	0	0	0	0	0	0	0.06	0	0	0.11	0.11	0	0.06	0	0	0	0
BnaA01G0037100ZS	0.59	1.09	0.39	0.28	0.24	0	0.6	0.73	0.34	0	0	0.24	0	0	0	0	0.7	0	0	0.16	0	0	0	0	0	0	0.64	0.99	1.5	0.81	0.4	0	0.31	0.74	0.53	0.53	0.31	0	0.53	0.65	0	0	0.44	0	0.6	0.08	0.27	0.09	0
BnaA01G0037200ZS	0.05	0.11	0.01	1.06	1.07	0.33	0.72	0.64	0.35	0.69	0.24	0.62	0.23	0.13	0.38	3.34	1.79	3.12	2.54	2.78	1.93	1.25	1.03	1.17	0.56	0.23	0.07	3.11	4.15	2.57	1.12	1.13	1.87	1.93	1.94	1.39	1.58	1.01	0.15	3.51	2.04	2.85	2.78	2.25	2.68	1.21	1.44	2.39	0.23
BnaA01G0037300ZS	0.83	0.13	0.18	0.44	0.1	0	0.29	0	0.07	0.59	0.16	0.11	0.7	1.26	0.7	0.52	1.37	0.91	0.7	0.5	0.31	0.1	0.3	0.35	0.2	0.2	0.08	0.45	0.49	0	0.15	0	0.15	0	0	0	0.08	0.61	0.22	0.15	0.26	0.24	0.23	0.28	0.6	0.26	0	0.11	0.3
BnaA01G0037400ZS	3.81	3.92	4.87	6.93	6.49	7.16	3.44	2.86	3.57	3.29	2.59	2.74	4.83	5.78	5.83	4.4	5.52	5.03	3.17	4.8	3.45	3.09	4.05	3.36	6.1	5.29	6.65	4.04	3.05	3.88	1.86	2.54	1.71	1.68	2.53	2.35	5.52	5.63	3.47	4.92	2.91	3.01	2.77	2.89	3.26	2.5	2.86	2.42	3.02
BnaA01G0037500ZS	29.11	27.7	27.24	9.85	10.49	11.47	17.6	19	18.06	20	19.53	18.8	30.81	28.24	35.09	4.91	5	2.83	8.32	7.58	10.74	16.92	13.99	19.22	24.07	20.26	23.76	21.79	21.66	22.11	21.31	19.72	20.91	17.29	21.19	20.54	17.34	19.06	23.19	11.84	16.38	12.51	12.63	9.79	10.43	19.57	15.66	13.08	31.65
BnaA01G0037600ZS	0	0	0	0	0	0	0	0	0	0.07	0	0	0	0.16	0	0	0	0	0	0	0	0	0	0	0	0.08	0	0	0	0	0	0	0	0	0	0	0	0	0	0	0	0	0	0	0	0	0	0	0
BnaA01G0037700ZS	0	0.04	0	0	0	0	0	0	0.02	0	0	0	0	0	0	0	0	0	0	0	0	0	0	0	0	0	0	0	0	0	0	0	0.03	0	0	0	0	0	0	0	0.02	0	0	0	0	0	0	0	0
BnaA01G0037800ZS	0	0	0	0	0.02	0.03	0	0	0	0	0.02	0	0	0	0	0	0.03	0	0	0	0	0	0	0	0	0	0	0.09	0	0.15	0	0	0	0	0	0	0	0	0	0.02	0	0	0	0	0.02	0	0	0	0
BnaA01G0037900ZS	0	0	0	0	0	0	0	0	0	0	0	0	0	0	0	0	0	0	0	0	0	0	0.08	0	0	0	0	0	0	0	0	0	0	0	0	0	0	0	0	0	0	0.31	0	0	0.02	0	0	0	0
BnaA01G0038000ZS	0	0	0	0	0	0	0	0	0	0	0	0	0	0	0	0	0	0	0	0	0	0	0	0	0	0	0	0	0	0	0	0	0	0	0	0	0	0	0	0	0	0	0	0	0	0	0	0	0
BnaA01G0038100ZS	1.02	0.68	0.18	0.28	0.78	0.87	0.64	1.32	0.91	0.69	0.96	0.92	0.11	0.51	0.22	0.28	0.09	0.44	0.61	0.19	0.46	0.05	0.25	0.39	0.39	0.67	1.14	1.76	1.24	0.76	0.68	1.4	1.25	1.29	1.64	1.11	0.48	1.12	0.84	0.64	0.5	0.2	0.32	0.21	0.42	0.2	0.4	0.4	0.55
BnaA01G0038200ZS	0	0	0.02	0	0	0	0	0	0.06	0	0	0	0	0	0	0	0	0	0	0	0	0	0	0	0	0	0	0.04	0	0	0	0.02	0	0	0	0	0	0	0	0	0	0	0	0	0	0	0	0	0
BnaA01G0038300ZS	12.26	10.08	9.76	9.44	6.97	8.84	7.43	8.16	7.89	4.47	5.01	4.45	9.36	6.63	5.59	4.08	5.87	4.77	6.1	5.36	4.78	5.61	6.41	2.65	9.42	9.31	10.11	6.39	6.03	9.15	6.48	5.53	6.64	5.18	3.9	5.91	6.77	7.74	8.67	6.96	5.07	6.49	6.4	5.22	6.27	6.69	7.21	6.49	6.14
BnaA01G0038400ZS	1.42	1.8	1.34	2.32	3.35	3.12	0.67	1.12	0.75	2.81	1.83	1.19	1.19	1.06	1.03	1.15	1.21	1.15	0.65	0.87	0.65	0.75	1.21	1.37	1.34	1.3	1.79	1.92	1.09	1.41	0.74	0.67	0.68	1.03	1.26	2	0.99	0.83	1.29	0.97	0.96	1.51	0.32	0.35	0.1	0.74	0.74	0.78	1.07
BnaA01G0038500ZS	1.24	1.46	1.32	0.54	0.49	0.78	1.25	1.42	1.56	0.86	0.71	0.59	1.63	1.6	1.57	0.77	0.57	0.72	2.39	2.94	2.06	0.96	1.65	1.21	1.06	0.95	1.17	1.22	1.14	1.16	2.38	2.17	2.48	0.83	0.97	1.41	0.83	1.44	0.92	1.9	2.22	1.88	3.22	3.77	4.26	2.46	2.44	2.5	0.89
BnaA01G0038600ZS	3.98	3.24	3.31	0.89	1.54	1.17	1.18	0.77	0.54	0.42	0.42	0.59	3.2	2.18	2.46	1.96	1.99	2.65	1.53	1.52	1.49	1.34	1.69	0.96	1.08	0.92	1.27	0.61	1.43	0.69	1.05	0.78	0.94	0.49	0.74	0.58	1.93	2.41	2.1	3.53	3.42	2.6	1.17	1.74	1.6	2.17	1.38	1.98	3.36
BnaA01G0038700ZS	3.34	2.6	3.53	2.85	2.96	3.62	2.05	2.73	3.33	2.45	1.76	2.37	3.56	4.55	4.41	4.14	4.71	4.64	3.74	3.42	4.43	3.93	4.49	3.81	2.21	3.52	2.7	1.28	2.94	3.09	2.65	3.52	2.48	2.35	2.76	2.82	4.99	4.7	5.18	4.43	5.03	2.84	4.92	4.03	3.11	4.49	4.64	4.18	2.23
BnaA01G0038800ZS	6.47	7.69	9.13	8.99	10.05	10.79	5.63	5.12	4.89	10.42	10.27	7.21	4.18	4.12	5.66	5.37	5.61	3.99	3.27	3.47	3.32	4.13	4.12	3.57	6.92	6.65	6.15	10.22	9.91	8.78	6.65	5.61	5.75	12.91	14.98	13.12	3.31	5.23	4.77	3.24	3.57	3.5	1.35	2.32	3.15	5.34	5.64	6.64	7.73
BnaA01G0038900ZS	4.97	4.28	2.74	4.44	5.11	4.51	4.53	4.31	4.43	4.16	3.88	4.53	5.03	4.33	3.22	4.02	4.16	3.69	4.03	4.4	4.2	5.37	5.07	7.26	2.27	3.2	3.98	5.93	6.01	5.01	5.07	4.09	4.36	4.92	4.16	2.92	3.85	4.06	4.32	6.02	5.08	5.28	3.28	2.9	3.94	4.16	3.87	5.13	3.07
BnaA01G0039000ZS	1.75	2.22	1.67	1.48	1.96	2.2	0.56	1.1	0.79	1.38	1.85	1.44	5.03	3.97	4.31	3.29	3.49	3.89	2.87	2.19	2.41	2.35	2.22	1.97	2.32	2.16	2.23	1.87	1.85	1.48	0.99	1.2	1.07	2.05	1.67	1.93	4.4	4.61	3.18	4.01	4.44	3.46	1.93	2.09	2.05	2.17	1.95	1.63	3.04
BnaA01G0039100ZS	0.42	0.15	0.26	0.18	0.12	0.17	0.14	0.33	0.07	0.12	0.08	0.15	0.74	0.77	0.98	0.37	0.71	0.49	0.22	0.68	0.23	0.32	0.84	0.81	0.14	0.07	0.16	0.1	0.15	0.07	0.28	0.48	0.33	0.14	0.44	0.26	0.37	0.46	0.72	0.75	0.76	0.58	0.14	0.48	0.28	0.8	0.74	0.8	0.61
BnaA01G0039200ZS	4.18	3.85	4.29	16.41	17.65	16.31	30.24	32.26	30.6	12.95	12.38	12.81	3.45	3.32	3.35	17.13	15.75	17.02	32.06	30.84	32.61	16.32	16.09	15.13	8.96	8.83	9.27	11.88	12.36	12.09	21.39	21.63	20.52	16.81	15.9	15.03	5.89	5.63	5.9	13.09	14.53	13.45	28.15	26.35	25.4	13.39	14.9	15.45	5.06
BnaA01G0039300ZS	0.76	0.97	1.07	0	0.05	0	0	0	0	0	0	0	0.35	0.13	0.11	0.02	0	0	0	0	0	0	0	0	0.44	0.47	0.53	0	0.03	0	0	0.05	0	0.19	0	0.03	0	0	0	0	0	0	0	0	0	0	0	0	1.99
BnaA01G0039400ZS	0.65	0.64	1.03	0.79	0.88	0.98	0.05	0.23	0.19	0.1	0	0	1.49	1	0.54	0.18	0.78	0.82	0.19	0.31	0.24	0	0.13	0.25	6.33	7.23	6.15	1.24	1	0.55	0.97	0.47	1.17	0.26	0.77	0.2	6.45	7.33	5.99	0.7	0.41	1.37	0.64	1.58	0.95	0.11	0.24	0.82	1.88
BnaA01G0039500ZS	0	0	0	0	0	0	0	0	0	0	0	0	0.29	0.58	0	0.28	0.19	0	0	0.19	0.1	0	0	0.03	0.12	0	0	0	0	0	0	0	0	0	0	0	0	0	0.16	0	1.19	0	0.23	0.19	0.04	0	0	0	0
BnaA01G0039600ZS	0	0	0	0	0	0	0	0	0	0	0	0.05	0	0	0	0.05	0	0.08	0	0	0	0	0	0	0	0	0	0	0	0	0	0	0	0	0	0	0	0	0	0	0.06	0	0	0	0	0	0	0	0
BnaA01G0039700ZS	0.24	0.11	0.26	3.31	3.44	3.22	1.78	1.71	1.62	0.49	0.49	0.6	0.11	0.17	0.16	12.21	11.8	12.97	8.6	8.01	9.02	2.84	2.4	2.19	0.08	0.16	0.09	3.03	3.6	3.08	1.96	1.71	1.42	0.83	0.99	0.76	0.22	0.31	0.37	9.19	10.5	10.74	6.56	5.69	4.9	1.76	1.46	1.14	0.17
BnaA01G0039800ZS	0.33	0.6	0.78	0	0.93	1.4	0.15	0.2	1.25	0.4	0.55	0.38	0.85	0.23	0	0	0.33	0.57	0	0	0.38	0	0	0.57	1.59	0.56	0.77	0.75	1.02	0.77	0.46	0.48	0.51	0	0.47	0.14	0.92	1	0.54	0.98	0.66	0.81	0.61	0.46	0.54	0	0.04	0	1.51
BnaA01G0039900ZS	3.68	3.51	3.7	1.3	1.53	1.66	0.83	0.61	0.63	0.34	0.43	0.41	4.62	4.84	5.08	1.97	1.98	1.41	1.19	1.07	1.08	1.54	1.36	1.38	3.33	3.42	2.55	1.95	2.89	2.68	0.75	0.59	0.48	1.92	2.32	2.09	3.16	2.97	2.97	3.37	2.91	3.41	1.05	1.02	1.22	1.03	1.19	0.92	9.68
BnaA01G0040000ZS	0.51	0.25	0.12	0.24	0	0.37	0.18	0.26	0.09	0.21	0.15	0.08	0.65	0.28	0.11	0	0.11	0.38	0.23	0.18	0	0	0.08	0	0.09	0.09	0.1	0.24	0.2	0.74	0	0.5	0	0.48	0.41	0.59	0.09	0.66	0.1	0	0.47	0.19	0	0.31	0.2	0.19	0.19	0.11	0.22
BnaA01G0040100ZS	11.17	10.95	11.26	9.38	9.28	9.38	6.03	6.21	5.01	4.65	4.1	5.24	11.85	10.68	12.08	4.87	5.19	6.07	3.63	5.47	4.64	3.84	4.65	3.52	10.86	10.93	11.6	9.18	11.44	8.68	3.95	5.02	4.86	3.92	4.09	6.69	10.86	9.71	10.74	6.83	6.36	7.51	3.54	3.8	3.75	2.42	2.16	2.83	10.88
BnaA01G0040200ZS	1.99	1.57	2.66	0	0	0	0	0	0	0	0	0	0.48	0.46	0.81	0.03	0	0	0	0	0	0	0	0	0.24	0.13	0	0	0	0	0	0	0	0	0	0	0.44	0.03	0.36	0	0	0	0	0	0	0.04	0.04	0	1.18
BnaA01G0040300ZS	0.32	0.22	0.33	1.99	2.37	1.87	0.38	0.32	0.43	0.31	0.22	0.1	0.12	0.41	0.16	3.23	2.57	3.26	0.81	0.86	0.89	0.21	0.06	0.17	0.29	0.21	0.44	2.91	2.45	2.27	0.82	1.14	1.28	0.36	0.41	0.32	0.17	0.25	0.26	2.98	1.99	2.63	1.19	1.13	1.13	0.17	0.21	0.11	0.58
BnaA01G0040400ZS	1.2	0.6	0.84	0.36	0.85	0.5	0.58	0.73	0.61	0.54	0.69	0.48	1.4	1.7	1.24	1.32	1.62	0.57	0.66	0.9	0.8	0.77	0.62	0.67	0.66	0.02	0.65	1.23	0	0.88	0	0.73	0	0.46	0.75	1.09	1.77	0.61	1.64	1.48	2.17	1.54	0.22	0.65	0	1.42	1.29	0.95	0.46
BnaA01G0040500ZS	1.41	1.3	0.76	0.11	0	0.1	0.23	0.09	0.12	0.02	0.15	0.05	1.45	1.44	1.14	0.82	0.87	0.62	0.39	0.25	0.41	1.04	1.35	0.96	0.53	0.74	0.59	2.04	2.15	1.61	0.48	0.6	0.73	1.05	1.29	1.63	1.11	0.66	0.91	3.13	2.56	2.92	1.68	1.77	1.81	4.65	4.89	4.37	0.74
BnaA01G0040600ZS	0	0.06	0.07	0	0.05	0	0.05	0	0.02	0.3	0.19	0.32	0.13	0.02	0.08	0.15	0.12	0.15	0	0	0	1.95	1.57	2.45	0.19	0.14	0.12	0.12	0.07	0.11	0.85	1.07	0.76	9.88	10.76	9.3	0.13	0.31	0.43	0.12	0	0.09	0.34	0.23	0.08	18.54	18.35	18.65	0.03
BnaA01G0040700ZS	0	0.06	0	0	0	0	0	0	0	0	0	0.06	0	0	0.03	0	0	0	0	0	0	0.02	0	0.02	0	0.05	0.02	0.02	0	0.03	0	0.07	0.03	0	0	0	0	0	0.03	0.02	0	0	0	0	0	0.03	0	0	0
BnaA01G0040800ZS	31.17	28.48	30.68	34.38	33.17	33.87	45.83	46.84	47.87	50.67	48.49	47.94	39.77	40.34	40.43	33.99	29.99	32.27	42.19	42.56	39.31	34.99	34.49	34.78	49.55	44.7	47.44	54.22	54.92	54.24	54.88	55.52	50.92	59.44	58	59.64	40.58	40.5	39.89	49.12	51.73	50.32	38.68	37.5	36.2	42.13	43.8	41.46	31.29
BnaA01G0040900ZS	44.29	44.6	43.18	44.72	46.81	46.08	50.33	49.61	50.24	62.23	62.31	64.46	44.61	48.33	48.84	41.74	41.12	38.54	42.76	41.7	43.51	59.44	60.07	55.44	61.06	60.34	60.54	58.38	61.14	59.97	63.6	62.75	64.14	88.05	87.52	85.4	57.42	56.28	59.55	52.16	57.88	55.55	42.72	39.95	41.01	82.79	82.8	82.91	37.96
BnaA01G0041000ZS	1.48	1.31	1.2	0.69	0.86	0.85	1.47	0.12	1.08	0.96	0	0.45	2.03	1.98	1.65	0.6	0.91	1.52	0.73	1.85	2	0.81	0.86	0.55	0	1.71	0.72	0.39	0.76	0.15	0	1.09	0.87	0.89	0.11	0	0.89	1.61	0.83	0.75	0.59	0.94	1.25	1.14	0.88	0.64	0.13	0.47	1.65
BnaA01G0041100ZS	0	0	0	0	0	0	0	0	0	0	0	0	0	0	0	0	0	0	0	0	0	0	0	0	0	0	0	0	0	0	0	0	0	0	0	0	0	0	0	0	0	0	0	0	0	0	0	0	0
BnaA01G0041200ZS	1.33	1.24	1.9	1.79	2.03	1.35	1.21	1.3	0.69	0.74	1.13	0.59	2.11	2.27	1.41	2.08	1.73	2.24	1.7	1.55	1.02	1.24	1.26	1.34	2.29	3.06	2.37	1.04	1.93	1.2	1.33	0.83	0.91	2.25	1.68	1.31	5.44	4.4	4.48	2.87	3.58	4.12	2.6	2.42	2.04	2.12	2.5	2.67	2.6
BnaA01G0041300ZS	0.46	0.07	0	0.84	0.4	0.67	0.89	0.63	0	0.25	0.39	0.21	1.39	0.93	2.66	0.21	0.31	0.3	0.22	0.43	0	0.12	0.26	0	1.71	2.43	1.41	0.67	0.24	0.42	0.48	0.88	0.61	0.1	0	0.39	2.68	3.71	2.62	0.59	0.51	1.19	0.25	0.58	0.67	0.55	0.68	0.52	0.41
BnaA01G0041400ZS	2.29	1.28	2.1	1.12	0.32	0.65	2.38	1.97	0.95	2.03	1.03	1.72	3.47	4.57	5.05	1.54	1.37	1.44	2.4	2.79	2.38	3.21	2.25	4.25	2.11	1.64	2.36	2.32	2.56	2.18	1.99	2.08	2.1	4.64	6.18	5.58	5.55	4.57	5.86	4.02	2.37	4.2	5.1	5.76	5.69	8.56	7.74	7.54	2.04
BnaA01G0041500ZS	0	0.09	0.03	0	0.08	0.1	0.01	0.02	0.09	0.01	0.12	0.09	0	0.03	0.05	0.04	0.04	0.04	0	0.04	0.03	0.05	0.01	0.09	0.04	0.01	0.04	0.1	0.08	0.08	0.05	0.05	0.05	0.04	0.2	0.19	0	0.03	0.08	0	0.11	0	0.09	0.25	0.09	0.05	0.07	0	0.03
BnaA01G0041600ZS	0	0	0	0.3	0.18	0.49	0.18	0	0.52	0	0.18	0	0.35	0.16	0.19	0.62	0	1.08	0.14	0.79	0	0	0	0.14	0	0	0.18	0.18	0.27	0	0.19	0.18	0.21	1.02	0	1.33	0	0	0	0.18	0.17	0.17	0	0.57	0	0.19	0	0	0.19
BnaA01G0041700ZS	1.09	0.9	1.04	0.03	0.04	0.06	0	0	0.1	0	0.03	0	0.51	0.46	0.4	0	0.1	0.03	0.08	0	0.03	0.03	0	0	0.1	0.46	0.24	0.07	0	0.08	0.04	0.14	0	0.03	0	0	0.12	0.41	0.36	0.07	0	0.1	0.07	0	0.08	0	0.04	0	0.87
BnaA01G0041800ZS	2.41	1.87	2.78	1.77	2.86	2.95	1.24	1.97	1.64	2.03	1.69	1.27	2.56	1.85	0.88	1.28	1.68	0.8	1.28	1.13	0.85	0.84	1.32	1.52	1.8	1.42	2.6	0.95	0.8	2.1	0.95	0.54	1.18	0.11	1.14	0	0.9	0.39	0.86	0.5	0.12	0.74	0.5	0.66	0.56	0.25	0	0.46	1.83
BnaA01G0041900ZS	0	0	0	0	0	0	0	0	0	0	0.08	0	0	0.1	0.44	0	0	0	0	0.74	0	0.04	0	1.31	0	0	1.14	0	0	0.55	1.05	1.38	1.33	0	0.17	0	1.91	2.25	3.36	3.19	3.91	4.12	1.12	0.21	1.15	0.98	0.92	0.92	0
BnaA01G0042000ZS	0	0	0	0.07	0	0	0	0	0	0	0	0	0.15	0.47	0	0.14	0.07	0	0.18	0.21	0.14	0	0	0.34	0	0	0	0	0	0	0	0	0	0	0	0	0	0	0	0.29	0.15	0.07	0	0.16	0	0	0	0	0
BnaA01G0042100ZS	0	0.78	0	0	0.17	0.15	0.16	0.17	0.16	0	0	0.15	0	0.16	0	0.2	0	0.3	0	0.38	0	0	0	0	0	0.18	0	0	0	0.2	0	0.18	0	0	0	0	0	0	0	0	0	0	0	0	0	0	0.38	0.43	0
BnaA01G0042200ZS	0	0	0	0	0	0	0	0	0	0	0	0	0	0	0	0	0	0	0	0	0	0	0	0	0	0	0	0	0	0	0	0	0	0	0	0	0	0	0	0	0	0	0	0	0	0	0	0	0
BnaA01G0042300ZS	0	0	0	0.12	0.09	0.08	0.03	0	0.03	0	0	0	0	0	0	0.35	0.4	0.1	0.09	0.06	0.14	0	0	0	0	0.05	0	0.21	0.24	0.1	0	0	0	0.03	0.03	0	0.06	0.06	0.06	0.12	0.27	0.48	0.06	0.14	0.03	0	0	0	0
BnaA01G0042400ZS	0	0	0	0	0	0.15	0.25	0.06	0	0.05	0	0	0	0	0	0	0	0.05	0	0	0	0	0	0	0	0	0.06	0.18	0.5	0.47	0.06	0	0	0	0	0.2	0	0	0	0	0	0	0	0	0	0	0	0	0
BnaA01G0042500ZS	0	0.29	0.39	0.51	0.11	0.6	0.19	0.54	0.31	0.26	0.72	0.57	0	0	0.09	0	0	0	0	0	0	0	0	0	0	0.67	0	0.47	0.2	0.86	0.6	0	0.13	0.1	0.96	0.51	0.28	0.71	0.97	0	0	0.1	0	0	0	0	0	0	0
BnaA01G0042600ZS	0.06	0.23	0.12	0	0.06	0	0	0	0.02	0	0	0	0.09	0.23	0.11	0	0.02	0	0	0	0	0	0	0	0	0.16	0.13	0	0	0.2	0.02	0.03	0	0	0	0	0.08	0	0.11	0	0	0.02	0	0	0	0	0.02	0	0.21
BnaA01G0042700ZS	0	0	0	0	0.25	0	0	0.81	0	0	0	0.08	0.72	4.06	3.21	2.08	3.75	3.2	2.15	3.24	2.1	1.34	3.34	2.33	0.21	0	0	0	0.2	0.26	0	0	0	0	0	0	2.87	2.52	4.68	4.79	6.48	2.57	3.55	2.79	2	1.55	1.85	1.5	0
BnaA01G0042800ZS	1.73	1.09	1.4	0.83	0	0.12	0.56	0.66	0.35	0.19	0.31	0.37	0	1.23	0	0	0	0.33	0	0	0	0.09	0.88	0	0.01	0	1.1	0.2	0.9	0	0.01	0	0.08	0	0.8	0.09	0.52	1.13	0.94	0.81	0	0.97	0.28	0.56	0.17	0	0.16	0.32	2.66
BnaA01G0042900ZS	0.69	0.78	0	0	0.06	0	0.41	0	0.35	0	0.39	0.01	1.11	2.1	0.72	0.51	2.11	1.16	1.53	1.05	1.42	0.46	0.25	0.74	0.51	0.38	0.04	1.22	0.14	0.49	0	0.63	0	0.31	0	0	0.99	1.23	1.52	1.31	0.69	1.19	0	1.41	0.1	1.01	0.79	0	0.22
BnaA01G0043000ZS	0	0	0	0	0.09	0	0.27	0.34	0.08	0	0	0.06	0	0.04	0	0.16	0.74	0	0	0	1.27	0	1.24	0	0.16	0.53	0	0	0.14	0.18	0	0	0.76	0	0.53	0	0	0.3	0	0	0	0.31	0.96	0	0	1.36	0	1.57	0.12
BnaA01G0043100ZS	6.09	7.16	11.76	2.81	4.58	2.9	3.21	2.32	0	5.55	1.29	2.67	48.62	54.46	56.61	31.1	32.15	29.54	17.26	19.8	20.97	15.11	16.8	15.67	12.96	7.84	13.33	0.53	1.34	3.5	8.68	6.43	7.75	2.18	1.43	4.14	48.97	46.03	50.67	26.13	27.47	27.4	18.07	17.56	18.8	12.05	12.65	14.53	10.42
BnaA01G0043200ZS	1.23	1.49	1.78	0.14	0.34	0.26	0.03	0.05	0.02	0.02	0.03	0.06	0.62	0.58	0.7	0.14	0.1	0.18	0	0	0.03	0	0	0	0.87	0.7	0.77	0.1	0.13	0.08	0.16	0.08	0.1	0.02	0.03	0	0.84	0.4	0.56	0.08	0.02	0.32	0	0.02	0	0.06	0.03	0	1.16
BnaA01G0043300ZS	0	0	0	0	0	0	0	0.14	0	0	0	0	0	0.12	0	0	0	0	0	0	0	0	0	0	0.41	0.4	0.14	1.28	1.16	0.93	0	0	0	0	0	0	0	0	0	0	0	0	0	0	0	0.15	0.16	0.33	0
BnaA01G0043400ZS	0	0	0	0	0	0	0	0	0	0	0	0	0	0	0	0	0	0	0	0	0	0	0	0	0	0	0	0.48	0	0	0	0	0	0.3	0	0	0	0	0	0.16	0	0	0	0	0	0	0	0	0
BnaA01G0043500ZS	16.55	18.23	17.32	16.43	17.14	17.64	12.03	11.25	12.8	14.42	14.84	12.5	14.91	14.89	16.52	10.7	11.1	9.38	8.99	9.61	8.89	12.22	12.2	11.49	16.32	21.69	16.14	19.1	16.56	14.03	16.08	14.68	8.19	16.1	15.89	9.92	15.32	15.72	14.95	11.79	13.13	13.64	8.01	8.16	7.68	12.06	13.09	12.23	25.79
BnaA01G0043600ZS	9.53	11.77	9.92	3.65	4.73	4.12	2.21	4.45	2.98	1.63	1.84	2.24	12.31	11.71	10.39	9.95	9.66	9.62	4.75	5.76	5.64	1.03	2.48	1.6	10.24	9.64	11.18	3.07	6.65	4.4	2.04	2.59	2.85	0.82	1.2	1.83	12.04	11.25	10.68	7.84	7.74	8.02	4.5	4.88	4.39	2.67	1.35	2.44	11.35
BnaA01G0043700ZS	8.93	11.76	13.41	7.57	5.99	8.6	2.43	5.61	2.92	4.21	4.37	2.14	15.29	12	13.88	8.36	13.96	12.55	7.56	6.71	6.61	4.78	4.18	3.81	12.4	9.9	7.31	5.95	8.42	6.66	4.39	3.89	2.81	1.98	1.65	3.63	15.16	14.31	15.45	13.27	14.84	11.73	5.57	4.54	3.46	2.91	2.5	3.12	6.7
BnaA01G0043800ZS	0.48	0.64	0.59	0.99	0.96	0.87	1.32	1	1.32	1.47	1.06	1.03	1.2	1.15	1.2	0.94	1.07	1.39	1.87	1.28	1.8	1.43	1.43	1.43	0.85	0.88	1.15	1.22	1.64	1.42	0.86	1.3	1.05	2.58	2.05	2.33	0.88	1.34	0.97	0.85	1.14	1.21	0.92	1.14	0.8	2.11	2	1.63	0.68
BnaA01G0043900ZS	0	0	0	0	0	0	0	0	0	0	0	0	0	0	0	0	0	0	0	0	0	0	0	0	0	0	0	0	0	0	0	0	0	0	0	0	0	0	0	0	0	0	0	0	0	0	0	0	0
BnaA01G0044000ZS	1.15	1.66	2.36	2.02	1.42	0.91	0.72	1.43	1.41	2.08	0.6	1.2	3.39	1.93	3.07	2.76	3.32	1.95	0.95	2.45	1.77	2	2.04	2.38	1.26	1.26	2.07	2.05	1.03	1.54	1	1.64	1.7	2.28	1.5	2.84	2.69	2.47	2.84	1.8	1.88	2.28	1.74	1.52	1.93	2.15	2.54	1.77	0.47
BnaA01G0044100ZS	2.24	2.37	1.58	1.28	1.14	1.25	0.78	1.05	0.78	0.2	1.03	1.08	2.4	2.91	2.36	1.41	1.51	1.69	1.86	1.44	1.29	1.38	0.86	0.84	2.47	1.74	2	0.64	1.5	0.71	0.99	0.64	0.47	0.78	1.44	0.81	1.76	1.92	2.37	1.1	0.81	0.76	0.77	1.21	0.65	0.97	1.06	0.92	1.64
BnaA01G0044200ZS	2.99	2.96	2.76	1.75	2.08	1.52	1.25	1.01	1.23	1.46	1.18	1.15	2.76	2.91	2.44	2.17	2.2	2.2	1.49	1.44	1.75	2.56	2.41	2.32	2.52	2.27	2.09	1.23	1.35	1.47	1.06	1.09	1	1.9	2.48	2.41	2.82	2.26	2.97	1.74	1.92	2.07	1.93	1.82	1.56	2.81	3.07	2.45	2.78
BnaA01G0044300ZS	26.07	22.58	21.74	10.46	13.36	15.33	9.43	10.4	9.39	9.65	9.69	10.23	28.98	22.85	31.23	20.99	19.99	21.35	15.83	17.4	19.23	13.59	18.37	13.46	24.59	20.77	20.3	13.88	14.54	12.65	8.48	10.65	10.04	10.87	9.37	9.78	30.02	29.07	28.16	14.23	18.86	15.39	11.92	10.5	12.83	14.69	13.51	16.3	27.18
BnaA01G0044400ZS	0.79	0.68	0.86	1.1	1.75	1.48	0.97	1.1	0.7	0.85	0.57	0.85	5.18	4.95	4.71	9.54	9.81	9.17	5.74	7.22	7.15	3.92	3.92	3.59	1.16	1.23	1.1	1.12	1.17	1.17	1.06	1.41	0.97	0.74	0.87	0.78	5.04	4.99	4.38	6.91	4.96	5.89	4.58	4.88	4.45	3.35	2.99	2.97	1.09
BnaA01G0044500ZS	1.43	1.39	1.42	1.61	2.86	2.28	2.43	1.7	1.29	1.39	1.67	0.91	1.74	2.15	2.13	0.64	0.73	0.87	0.86	0.7	1.52	2.76	1.62	0.36	2	1.58	1.44	2.29	1.84	1.97	0.59	0.81	1.32	0.99	2.18	0.3	1.46	1.54	2.15	1.28	1.5	1.5	0.7	0.47	0.99	1.17	1.55	1.6	2.12
BnaA01G0044600ZS	0	0.2	0.15	0	0.11	0	0	0.13	0	0	0	0.14	0.76	0.56	0.21	0.08	0	0	0.04	0	0.61	0	0	0.06	0.1	0	0	0.07	0.11	0	0.16	0	0.06	0	0.15	0	0.12	0.1	0.51	0.07	0	0	0.12	0.1	0	0	0.06	0	0.19
BnaA01G0044700ZS	0.4	0.41	0	0.76	0.68	0.93	0.51	0	0.3	0.1	0.05	0.1	4.39	4.17	5.55	7.71	5.52	6.89	3.59	4.31	4.89	3.82	4.13	3.91	0.96	0.5	0.41	0.15	0.51	0.3	0.64	0.78	0.66	1.03	1.2	1.07	4.22	6.1	6.07	5.96	8.18	7.13	3.42	2.31	2.8	3.8	4.06	2.53	1.76
BnaA01G0044800ZS	0.14	0	0	0.43	0.24	0.41	0.47	0.39	0.32	0	0.06	0	0	0	0	0	0	0	0	0	0	0	0	0	0	0	0	0.05	0.28	0.2	0.24	0	0.08	0.04	0.05	0	0	0	0	0	0	0	0	0	0	0	0	0	0
BnaA01G0044900ZS	0	0	0	0	0	0	0.36	0	0	0.11	0.6	0	0	0	0.25	0	0.12	0	0	0	0	0.2	0.21	0.59	0.14	0	0	0	0	0.39	0.49	0.36	1.24	0.8	0.57	0	0.25	0.58	0.25	0.12	0.11	0.34	0	0.23	0.41	0.65	0.42	0	0
BnaA01G0045000ZS	0.83	0	0.03	0	0.27	1.74	0.38	0	0.39	0	0.15	0.62	0	0	0	0	0	0	0	0	0	0	0	0	0.25	0	0.39	0	0.07	1.96	0	0	0.37	0.09	0.02	0.16	0	0	0	0	0	0	0	0	0	0	0	0	0
BnaA01G0045100ZS	0	0	0	0	0	0	0	0	0	0	0	0	0	0	0	0	0	0	0	0	0	0	0	0	0	0	0	0	0	0	0	0	0	0	0	0	0	0	0	0.05	0	0	0	0	0	0	0.1	0	0
BnaA01G0045200ZS	0.22	0.15	0.12	0.22	0	0	1.19	1.7	0.88	0.43	0.37	0.66	0.12	0.04	0	0.43	0.36	0.07	1.16	0.65	0.56	1.5	1.29	1.1	0.02	0	0	0	0.24	0.6	0.82	0.52	1.11	0.88	1.17	1.2	0.03	0	0.03	0.42	0.41	0.89	0.67	0.4	0.79	2.78	2.63	1.89	0.08
BnaA01G0045300ZS	5.91	5.08	4.08	4.19	4.22	3.7	4.66	4.93	4.31	5.01	3.09	4.54	5.96	5.85	5.07	4.63	3.19	4.44	4.9	5.38	4.34	5.45	3.85	4.34	4.94	5.63	6.26	7.76	7.06	6.96	5.92	5.42	5.23	5.55	6.15	5.79	6.59	7.37	6.8	6.69	6.68	6.57	6.53	5.49	5.21	7.6	6.63	6.97	5.86
BnaA01G0045400ZS	0	0	0	0	0	0	0	0	0	0.21	0.07	0.03	0	0	0	0	0	0	0	0	0	0.06	0.1	0.25	0	0	0	0	0	0.04	0.07	0.07	0.04	0	0.09	0.08	0	0	0	0	0	0	0	0	0	0	0	0	0
BnaA01G0045500ZS	0.18	0.08	0	0.89	0.14	0.61	0	0.06	0.45	0.31	0.6	0	0.19	0	0.26	0	1.15	1.43	0.56	0.25	0	1.36	0	1.38	0.25	0	0.41	1.41	0	1.3	0.49	0.67	0.59	0.94	0	0.12	0.33	0	0	2.45	1.15	2.61	2.3	0.24	2.47	1.32	0.79	0.8	0.27
BnaA01G0045600ZS	0.62	0.61	0.67	1.99	1.55	1.73	0.09	0.03	0.06	0.03	0.06	0	3.32	2.98	3.74	3.64	2.74	3	0.77	0.81	1.01	0.97	0.7	0.57	1.08	1.24	0.71	0.55	0.58	0.49	0.23	0.13	0.24	0.21	0.09	0.08	2.09	2.48	2.02	1.51	2.05	1.77	0.53	0.75	0.55	0.93	0.59	0.69	0.85
BnaA01G0045700ZS	0.01	0	0	0.1	0.04	0.14	0.29	0.2	0.21	0.27	0.24	0.22	0	0.03	0.01	0.15	0.09	0.07	0.29	0.42	0.27	0.32	0.23	0.19	0.05	0.06	0	0.06	0	0.08	0.15	0.12	0.14	0.16	0.08	0.06	0	0	0	0.03	0.05	0.09	0.18	0.37	0.4	0.19	0.07	0.13	0.02
BnaA01G0045800ZS	0.13	0.11	0.33	0.39	0.13	0.16	0.17	0.18	0.25	0.23	0.13	0.14	0.96	1.21	1.27	1.11	0.14	1.25	0.04	0.49	1.15	1.96	0.48	0	0.25	0.33	0.12	0.15	0.13	0.76	0.43	0.48	0.2	0.66	0.61	0.65	0.61	1.71	2.27	0	0.57	0.8	1.51	0.17	0	0.89	0.17	1.43	0.79
BnaA01G0045900ZS	16.59	16.34	20.08	6.2	7.17	6.69	2.86	2.53	2.18	0.14	0.08	0.16	12.57	12.65	11.45	2.15	1.79	1.57	0.13	0.84	0.48	0	0	0	9.93	11.56	10.96	6.22	6.41	6.31	0.97	1.67	2.02	0.31	0.39	0.09	14.29	14.71	14.97	1.96	2.1	1.65	0.95	0.8	1.07	0.33	0.31	0.06	7.03
BnaA01G0046000ZS	1.06	1.15	1.28	0.55	0.39	0.75	0.04	0.55	0.21	0.13	0	0.11	0.82	0.68	0.86	0.21	0.27	0.33	0.05	0.13	0.14	0.19	0.09	0.14	1.37	2.3	1.66	0.8	0.84	1.24	0.29	0.25	0.41	0.15	0.12	0.05	0.59	0.61	0.71	0.23	0.23	0.21	0.3	0.21	0	0.03	0.05	0.03	0.99
BnaA01G0046100ZS	0	0.12	0	0	0	0.45	0	0	0.03	0	0	0	0	0.55	0	0.54	0.14	0	0	0	0	0	0	0	0.93	0.26	0	0	0.21	0	0.43	0	0.1	0	0	0	0	0	0	0.62	0	0	0	0	0	0	0	0	0
BnaA01G0046200ZS	34.04	30.88	32.81	32.43	37.72	38.86	31.13	29.41	29.06	35.39	31.74	35.93	36.09	38.84	43.91	35.18	38.95	36.09	33.84	31.03	30.98	38.29	34.86	34.73	33.68	28.31	34.14	37.89	35.75	33.87	22.29	23.71	22.19	31.53	30.58	32.05	37.66	32.86	37.46	35.2	40.21	33.16	21.19	20.65	23.32	27.98	27.44	28.35	32.68
BnaA01G0046300ZS	2.21	1.28	2.07	3.45	4.27	5.2	6.78	6.32	7.34	7.11	6.84	7.17	3.47	2.85	2.97	7.13	6.71	7.16	10.24	9	10.61	14.79	12.65	11.69	3.13	2.95	1.79	3.6	4.78	1.93	6.6	5.85	8.84	8.82	8.64	7.7	1.88	2.23	2.02	4.91	4.24	4.46	4.73	6.72	6.2	2.79	2.16	2.84	0.84
BnaA01G0046400ZS	0.26	0.07	0.11	1.89	1.19	0.6	1.67	0.97	1.2	0.34	0.44	0.72	0.08	0.15	0.1	0.89	1.31	0.79	2.12	1.67	1.7	0.27	0.29	0.87	0	0.05	0.06	1.83	1.96	1.93	0.83	0.55	1.78	0.2	0.15	0.45	0	0.21	0	1.24	1.97	1.3	1.16	0.9	1.28	0.16	0.08	0.53	0.47
BnaA01G0046500ZS	1.16	0.38	0.5	1.21	0.52	1.34	0.19	0.21	1.22	0.49	0.2	0.51	1.18	0.9	0.55	0.15	0.98	0.61	0.64	0.66	0.81	0.96	0.71	0.53	0.52	0.8	1	0.25	1.13	0.58	0.54	0.87	0.47	0.85	1.21	0.22	1.47	3.01	2.19	2.05	0.97	1.21	1.13	0.83	0.85	2.58	2.11	3.71	1.69
BnaA01G0046600ZS	0	0.04	0	0	0	0	0	0	0	0.03	0	0	0	0	0	0	0	0	0	0	0.03	0.08	0.02	0	0	0	0.05	0.02	0	0	0	0	0	0.04	0	0.02	0.03	0	0	0	0	0	0	0.03	0	0	0	0.04	0
BnaA01G0046700ZS	15.25	15.18	14.47	9.87	8.97	10.27	8.88	8.5	8.16	3.96	5.2	4.66	16.47	13.3	16.98	10.37	9.62	8.81	7.93	10.88	8.89	5.19	6.27	6.06	18.89	17.57	17.5	8.98	9.89	8.8	11.76	10.28	9.03	4.02	4.88	3.41	18.52	18.71	18.42	6.4	8.88	8	8.33	7.55	7.14	4.03	3.41	4.51	14.65
BnaA01G0046800ZS	0.29	0.24	0.37	0.14	0.24	0.28	0.27	0.11	0.31	0.34	0.35	0.42	0.15	0.22	0.27	0.09	0.15	0.09	0.19	0.14	0.14	0.34	0.29	0.31	0.2	0.22	0.31	0.18	0.11	0.18	0.22	0.12	0.25	0.27	0.17	0.34	0.19	0.23	0.23	0.13	0.17	0.15	0.11	0.08	0.18	0.38	0.28	0.53	0.41
BnaA01G0046900ZS	1.56	1.54	1.64	2.9	3.43	3.55	1.35	1.26	1.54	1.07	1.79	1.09	1.7	1.26	1.2	1.14	1.18	0.83	0.77	0.62	0.68	1.4	1.34	1.06	3.89	3.73	4.05	4.5	4.69	4.57	1.35	1.89	1.84	1.07	1.65	1.94	1.16	2.02	1.56	1.67	1.14	1.34	0.73	0.73	0.43	0.66	0.92	1.11	1.92
BnaA01G0047000ZS	5.79	5.82	6.47	15.3	16.14	13.4	8.75	8.5	9.72	10.18	12.16	10.58	13.41	13.23	12.52	12.68	12.62	13.86	8.79	8.17	7.52	14.51	12.73	13.85	5.75	5.82	5.41	8.89	9.35	8.99	15.74	15.95	15.31	9.34	7.17	7.43	9.27	8.58	9.07	6.53	6.73	6.74	9.33	9.12	9.51	7.65	7.64	8.46	2
BnaA01G0047100ZS	0	0	0	0	0	0	0	0	0	0	0	0	0	0	0	0	0	0	0	0	0	0	0	0	0	0	0	0	0	0	0	0	0	0	0	0	0	0	0	0	0	0	0	0	0	0	0	0	0
BnaA01G0047200ZS	0	0	0	0	0	0	0	0	0	0	0	0	0	0	0	0	0	0	0	0	0	0	0	0	0	0	0	0	0	0	0	0	0	0	0	0	0	0	0	0	0	0	0	0	0	0	0	0	0
BnaA01G0047300ZS	0	0	0	0	0	0	0	0	0	0	0	0	0	0	0	0	0	0	0	0	0	0	0.17	0	0	0	0	0	0	0	0	0	0	0	0	0	0	0	0	0	0	0	0	0	0	0	0	0	0
BnaA01G0047400ZS	1.4	0	0.06	1.34	1.82	0	0	0.06	0.23	0	0.57	0.05	0	0	0	0	0	0	0	0	0	0	0	0	0.84	0	1.27	0	1.18	1.03	0	0.07	0	0.03	0.22	0.45	0	0	0	0	0	0	0	0	0	0	0.07	0	0
BnaA01G0047500ZS	4.61	3.74	2.46	1.59	1.4	2.05	0.57	0.74	0.57	0.15	0.2	0.11	1.64	1.2	1.29	1.15	0.7	0.5	0.35	0.78	0.63	0.23	0.33	0	1.67	1.7	2	2.14	2.06	1	0.17	0.46	0.62	0.15	0.27	0.17	0.25	1.18	1.19	0.09	0.71	0.14	0.09	0.73	0.7	0.33	0.13	0.44	4.9
BnaA01G0047600ZS	0	0	0	0	0.02	0	0	0	0	0	0	0	0.02	0.1	0.12	0	0	0.03	0	0	0	0	0	0	0	0	0	0	0	0	0	0	0	0	0	0	0	0	0.04	0	0	0	0.06	0	0	0.09	0.06	0.07	0
BnaA01G0047700ZS	0	0	0	0	0	0	0	0	0	0	0	0	0	0.03	0	0	0	0	0	0	0	0	0	0	0	0	0	0	0	0	0	0	0.04	0	0	0	0	0	0	0	0	0	0	0	0	0	0	0	0
BnaA01G0047800ZS	0	0	0	0	0	0	0.12	0.48	0	0	0	0	0	0.3	0.4	0.36	0.52	0.36	0.06	0.31	0.13	0.3	0.18	0.16	0	0	0	0	0	0	0	0	0	0	0	0.29	0	0	0	0.15	0.47	0.05	0.69	0	0.13	0.37	0	0	0.01
BnaA01G0047900ZS	49.49	53.49	50.62	36.11	34.88	35.47	43.22	41.99	43.8	39.35	39.19	39.17	38.65	38.26	38.94	31.42	30.93	32.08	35.56	36.88	35.05	38.91	39.47	39.75	41.22	43.93	42.32	27.72	29.41	29.54	36.63	36.23	35.58	26.88	27.8	27.86	36.67	38.03	37.49	25.9	24.93	25.47	32.03	31.83	30.01	30.18	30.6	32.01	37.33
BnaA01G0048000ZS	0	0	0	0	0	0	0	0.01	0	0	0	0	5.45	5.75	5.29	6.06	6.38	5.55	3.83	3.58	3.16	3.28	3.1	3.02	0	0	0	0	0	0	0	0	0	0	0	0	5.49	4.45	4.3	4.46	2.97	4.93	2.57	3.07	3.76	2.03	2.01	1.32	1.39
BnaA01G0048100ZS	1.04	1.58	0.81	0.86	0.69	0.54	0.55	0.58	0.74	0.73	0.46	0.83	0.33	0.37	0.49	0.32	0.21	0	0.17	0.3	0.14	0.27	0.22	0.37	0.69	0.64	0.91	1.3	1.1	0.55	0.81	0.85	0.51	0.71	0.49	0.7	0.18	0.11	0.38	0.07	0.28	0.39	0.22	0.11	0.3	0.47	0.43	0.45	1.54
BnaA01G0048200ZS	0	0.02	0	0	0	0.02	0.05	0	0.02	0	0.03	0	0.05	0	0.08	0.03	0.18	0.09	0	0	0.02	0.13	0.02	0.04	0.02	0.02	0.18	1	1.67	1.87	0.13	0.05	0.12	1.14	1.03	1.03	0	0.04	0	0.21	0.11	0.22	0.03	0.02	0.06	1.58	1.89	1.95	0
BnaA01G0048300ZS	1.36	1.56	2.51	0.28	0.3	0.22	0.25	0.17	0.24	0.15	0.08	0.28	6.81	5.86	7.24	1.54	1.26	1.34	1.27	0.24	0.7	1.32	1.35	1.52	0.25	0.32	0.18	0.09	0.52	0.18	0.09	0.45	0.59	0.48	1.29	0.52	1.5	1.11	0.42	0.88	0.16	0.48	0.75	0	0.56	0.44	0.51	0.79	0.9
BnaA01G0048400ZS	8.53	8.31	9.18	8.98	9.37	9.21	5.5	4.89	4.72	2.24	2.61	2.97	2.9	3.6	3.6	4	3.78	4.11	4.12	3.87	3.79	1.86	2.14	2.59	10.2	9.36	11	12.14	14.06	14.11	5.52	4.99	5.19	2.42	1.74	3.04	5.1	4.65	5.24	5.21	5.4	4.68	4.17	4.36	4.04	3.26	3.23	3.71	8.94
BnaA01G0048500ZS	0	0	0.03	1.39	1.99	1.75	1.96	1.37	1.61	0.41	0.38	0.29	0	0.02	0	0	0	0.14	0.42	0.91	0.88	1.85	2.49	1.93	0	0	0	0.03	0.14	0.03	1.64	1.7	1.52	0.83	1.42	1.16	0	0	0.03	0.03	0	0	0.27	0.24	0.28	0.56	0.72	0.38	0
BnaA01G0048600ZS	58.23	54.62	56.31	46.41	46.71	48.27	58.78	54.58	56.62	28.47	26.32	27.01	78.14	68.93	72.62	60.79	57.31	59.53	73.14	64.73	71.71	47.02	41.6	44.98	53.88	51.98	54.47	29.4	30.37	28.33	46.3	47.72	45.33	29.62	28.51	30.44	57.47	56.98	62.56	26.7	28.67	26.66	46.1	44.27	45.59	28.24	27.83	26.73	41.45
BnaA01G0048700ZS	2.07	1.82	2.18	0.76	0.57	0.26	0.92	0.62	0.69	0.63	0.19	0.47	1.34	2.35	1.13	1.34	0.64	0.77	0.8	0.32	0.46	0.16	0.21	0.29	1.65	0.66	1.18	0.8	1.25	0.61	0.29	0.47	0.55	0.36	0	0.05	1.29	0.96	1.32	0.42	0.48	0.63	0.37	1.42	0.71	0.36	0.42	0.39	2.46
BnaA01G0048800ZS	1.25	0.67	0.52	1.08	0.65	0.36	1.45	0.64	0.71	1.29	1.57	1.25	0.81	0.62	0.52	1.34	1.78	1.78	1.64	1.14	1.57	0.73	1.26	1.16	1.1	0.86	1.23	0	0.52	0.32	0.88	0.34	0.65	0.59	0.25	0.37	0.55	0.31	1.4	0.5	0.51	0.52	0.6	0.79	1.08	0.68	0.7	0.26	0.71
BnaA01G0048900ZS	0	0	0	0	0	0	0	0.13	0	0	0	0	0.37	0.11	0.26	0	0.12	0	0	0	0	0	0	0	0	0	0	0	0	0	0	0	0	0	0	0	0	0	0	0	0	0	0	0	0	0	0	0	0
BnaA01G0049000ZS	0	0	0.1	0	0	0	0	0	0	0	0	0	0.31	0	0	0	0	0	0	0	0	0	0	0	0	0	0	0	0	0	0	0	0	0	0	0	0	0	0	0	0	0	0	0	0	0	0	0	0
BnaA01G0049100ZS	0	0	0	0	0	0	0	0	0	0	0	0	0	0	0	0	0	0	0	0	0	0	0	0	0	0	0	0	0	0	0	0	0	0	0	0	0	0	0	0	0	0	0	0	0	0	0	0	0
BnaA01G0049200ZS	3.65	3.54	4.79	2.8	3.63	1.95	2.69	3.04	3.16	3.6	4.82	4.66	0.69	1.23	1.02	0.48	0.99	1.58	0.99	0.26	0.1	1.13	1	1.39	1.77	2.13	3.16	4.02	5.48	3.4	2.74	2.63	3.57	1.4	2.68	2.74	2.69	2.57	1.4	1.6	2.62	1.24	0.21	1.79	0.47	2.12	2.26	0.88	3.38
BnaA01G0049300ZS	1.92	1.4	1.63	3.12	3.5	3.38	2.97	3.48	3.68	3.29	3	2.43	1.93	2.09	2.02	5.15	4.8	4.59	4.12	4.1	4.28	3.62	4.35	4.02	4.69	4.57	4.66	4.64	5.12	4.31	3.75	4.06	3.96	2.1	2.56	2.31	3.13	3.86	3.87	5.95	6.24	6.09	2.86	4.26	3.76	3.31	2.94	3.27	2.61
BnaA01G0049400ZS	5.47	6.4	6.17	5.78	6.21	5.61	4.73	4.77	4.54	7.56	6.65	7.23	2.45	3.08	3.21	2.17	2.39	2.63	2.02	1.72	1.52	3.98	3.84	3.79	5.88	4.86	4.72	4.92	5.17	4.58	3.66	3.93	3.82	7.45	7.07	7.92	3.39	3.13	3.02	2.57	3.04	2.84	1.88	1.69	1.35	5.14	3.91	4.92	5.89
BnaA01G0049500ZS	0.06	0.26	0.12	0.1	0.06	0.5	0.12	0	0	0.16	0.06	0.25	0	0.05	0	0	0	0	0	0	0	0	0	0.05	0.47	0.11	0.12	0.36	0.19	0.07	0.44	0	0.14	0.52	0.13	0	0.07	0.12	0	0	0	0	0	0	0.14	0.07	0.07	0.14	0.2
BnaA01G0049600ZS	2.24	1.92	2.99	2.81	2.59	2.47	0.9	1.06	1.02	1.13	0.83	1.29	1.92	1.19	1.72	0.76	0.69	0.65	0.16	0.26	0.51	0.16	0.21	0.46	2.59	3.53	3.64	4.64	3.91	4.82	0.55	1.02	1.04	1.36	2.33	1.36	1.9	1.68	2.06	2.11	2.24	2.09	0.67	0.47	0.48	0.53	0.41	0.2	2.29
BnaA01G0049700ZS	0.24	0.36	0.26	0.94	1.25	1.13	0.77	1.1	1.1	1.17	0.77	1.13	0.08	0	0.01	1.43	0.92	1.34	1.26	1.05	1.14	0.78	0.65	0.57	0.03	0.01	0.14	0.76	0.85	0.64	0.7	0.63	1.07	0.76	0.85	0.61	0.06	0.04	0	0.63	0.76	0.9	1.01	0.9	0.78	0.59	0.53	0.84	0.07
BnaA01G0049800ZS	1.48	1.91	1.31	1.16	0.66	0.59	0.22	0.29	0.56	0.19	0.29	0.3	1.2	0.94	0.75	1.29	0.14	0.43	0.17	0.35	0.56	0.18	0.25	0	0.91	0.27	0.58	0.79	0.51	0.86	0.37	0.36	0.08	0.21	0.08	0.08	0.38	0.77	0.3	0.92	0.8	0.9	0.36	0.28	0.33	0.08	0.08	0.17	0.86
BnaA01G0049900ZS	0.23	0	0.06	0.05	0.37	0.17	0.12	0.06	0.06	0	0	0	0.12	0	0.06	0.05	0	0.05	0	0	0	0.05	0.05	0	0.24	0	0.06	0	0	0.07	0	0	0	0.06	0	0	0.06	0.06	0	0.06	0	0	0	0	0	0	0.13	0.07	0
BnaA01G0050000ZS	0	0	0	0	0	0	0	0	0	0	0	0	0	0	0	0	0	0	0	0	0	0	0	0	0	0	0	0	0	0	0	0	0	0	0	0	0	0	0	0	0	0	0	0	0	0	0	0	0
BnaA01G0050100ZS	17.37	17.72	16.22	18.31	19.37	22.03	12.49	14.75	14.43	12.06	13.91	10.33	10.45	11.77	11.41	8.63	6.98	5.86	8.51	9.59	8	11.86	11.82	9.57	18.23	16.19	17.93	16.91	16.19	19.34	13.08	13.77	14.31	14.72	14.55	11.17	11.13	10.72	13.46	9.63	11.41	12.33	8.87	9.52	8.68	11.2	12.68	10.21	20.14
BnaA01G0050200ZS	2.87	2.21	1.86	1.85	1.05	1.49	1.42	1.49	1.19	1.27	1.43	1.92	4.31	5.64	7.14	5.31	5.63	6.84	6.46	5.6	6.98	3.43	3.64	2.97	7.41	3.39	6.26	3.83	2.45	2.98	3.21	1.16	2.65	2.28	0.79	1.24	5.21	7.03	8.76	10.39	8.35	9	6.86	5.68	3.71	3.09	1.47	1.4	6.96
BnaA01G0050300ZS	0.33	0.51	1.15	0.79	0.67	1.06	0	0.17	0	0	0	0	0	0	0	0.24	0	0	0	0	0	0	0.15	0	0.52	0.83	1.04	2.23	1.75	1.77	0.34	0.28	0	0.14	0.1	0	0.29	0.51	0.42	0	0.55	0	0	0	0	0	0.03	0	0
BnaA01G0050400ZS	7.07	7.21	7.44	6.06	6.19	5.71	5.63	5.16	5.73	5.03	5.61	4.74	3.22	2.95	2.68	2.61	2.44	2.5	2.46	2.38	2.3	2.79	2.42	2.43	5.71	6.36	5.95	5.05	5.11	4.94	4.58	4.82	4.73	3.72	3.61	3.69	3.37	3.31	3.53	2.76	2.17	2.74	2.55	2.72	2.58	3.28	3.12	2.96	5.29
BnaA01G0050500ZS	0.04	0.02	0.02	0.02	0.04	0.11	0.45	0.45	0.81	0.42	0.25	0.46	0.02	0.02	0.04	0	0	0	0	0	0	0	0	0	0	0.06	0	0	0	0	0.58	0.52	0.55	0.43	0.59	0.28	0	0.04	0	0	0	0	0.02	0.04	0.1	0.18	0.5	0.27	0.02
BnaA01G0050600ZS	0.24	0	0.05	0	0	0	0	0	0	0.05	0.05	0.21	0	0	0	0.04	0	0	0	0	0	0	0	0	0.35	0.19	0.26	0.26	0	0.11	0.11	0	0	0.1	0	0	0.05	0.05	0	0	0.05	0	0	0	0	0	0.06	0	0
BnaA01G0050700ZS	0.05	0	0	0	0	0	0	0	0	0	0	0.02	0.27	0.17	0.14	0	0	0	0	0.12	0.03	0	0	0	0	0.03	0	0	0	0	0	0	0	0	0	0	0	0	0	0	0	0	0	0	0	0	0	0	0
BnaA01G0050800ZS	12.46	9.76	10.57	15.14	14.1	13.25	8.54	7.54	6.75	6.47	5.59	7.18	11.62	8.6	10.05	10.24	8.71	9.58	6.97	8.28	6.09	6.52	5.53	3.85	13.4	13.99	12.31	14.51	14.71	13.26	8.86	8.52	7.67	7.51	6.94	5.98	8.8	8.39	9.6	11.03	10.63	10.13	7.04	5.93	4.55	6.21	5.87	6.5	9.75
BnaA01G0050900ZS	6.2	6.51	7.82	1.31	0.73	1.71	1.28	0.95	1.28	1.13	1.28	0.88	0.3	0.46	0.28	0	0	0	0	0	0	0	0	0	1.35	1.37	1.28	0.71	1.19	1.55	2.07	1.55	1.66	2.48	1.72	1.61	0.44	0.51	0.78	0.07	0.1	0	0.11	0.15	0.17	0.61	1.41	1.19	5.32
BnaA01G0051000ZS	1.98	1.69	1.46	0.94	0.88	0.88	0.24	0.21	0.13	0.19	0.17	0.14	1.53	1.14	1.15	0.53	0.59	0.74	0.12	0.09	0.05	0	0.08	0.07	0.99	1.15	1.13	0.53	0.61	0.5	0.09	0.1	0.11	0.06	0.09	0.08	0.76	0.86	0.63	0.38	0.3	0.35	0.03	0.09	0.15	0.05	0.08	0.08	1.67
BnaA01G0051100ZS	2.09	1.94	1.85	1.7	2.21	3.03	3.13	2.22	3.01	2.99	4.44	3.43	1.18	2.52	1.06	2.57	2.05	2.35	2.67	2.5	1.8	3.57	2.9	3.59	2.61	2.29	1.48	2.5	2.3	0	2.24	2.07	1.24	3.19	3.28	3.05	1.77	0.97	1.35	0.59	1.58	1.3	0.8	0.85	1.11	2.13	1.37	1.93	0.37
BnaA01G0051200ZS	0	0.02	0	0	0	0	0	0	0	0	0	0	0	0.07	0	0	0	0	0	0	0.13	0.1	0	0	0	0	0	0	0	0	0	0	0	0	0.15	0.15	0	0.13	0	0	0	0	0	0.05	0	0	0	0	0
BnaA01G0051300ZS	2.85	2.89	2.96	1.8	1.97	2.11	1.11	1.23	1.46	0.98	0.96	0.9	2.16	2.46	2.47	1.82	2.02	2.12	1.27	1.3	1.35	0.77	1.1	0.97	1.76	2.3	2.15	2.52	2.68	2.4	0.97	1.18	1.08	0.72	0.56	0.47	2.12	1.98	1.74	3.16	2.77	2.69	1.43	1.45	1.35	0.65	0.55	0.52	2.99
BnaA01G0051400ZS	1.17	0.56	0.94	0.86	1.16	0	1.41	0.65	0	0.38	0.87	0.48	0.86	1.16	1.19	0.53	0.6	0.58	0.59	0.4	0.92	0.69	0.48	0.82	0	0.89	0.23	1.75	1	0.77	0.21	0.96	0	0	0.75	1.03	0.79	1.53	1.04	0.47	1.01	0.69	0.64	0.61	0.19	0.51	0.47	1.08	0.83
BnaA01G0051500ZS	0.12	0.07	0.1	0.66	0.21	0.53	0.05	0	0.04	0	0	0	0	0.03	0	0.11	0.09	0.06	0.03	0	0.04	0	0	0.02	0.18	0.63	0.41	0.43	0.62	0.18	0.03	0	0	0	0.09	0.03	0	0.08	0	0.03	0.04	0.32	0.04	0.12	0.1	0.06	0	0	0
BnaA01G0051600ZS	0	0	0	0	0	0	0	0	0	0	0	0	0.19	0	0	0	0.1	0	0	0	0.1	0.01	0	0.08	0	0	0	0	0	0	0	0	0	0	0	0	0	0	0	0	0	0.06	0.02	0	0	0	0	0	0
BnaA01G0051700ZS	0.81	1.29	0.88	1.33	2.13	1.49	1.34	0.19	0.79	0.36	0	0	0.46	0.36	0.56	1.21	0.84	1.82	1.34	0.45	0	0	0.07	0	1.4	0.99	1.34	0	0.86	0	0.38	0.36	0.39	1.28	1.47	0.77	0.09	1.09	0.46	0.27	0.58	1.13	0.58	0.97	0.53	0	0	0	0.22
BnaA01G0051800ZS	0.02	0.02	0.03	0.05	0.11	0.08	0.29	0.39	0.32	3.49	3.24	3.83	0.05	0.03	0	0.05	0.07	0.19	0.62	0.75	0.61	5.13	4.83	4.35	0	0.02	0	0.02	0.11	0.02	1.54	1.86	1.27	5.99	6.19	5.98	0.1	0.02	0	0.14	0.09	0.23	0.44	0.6	0.53	3.15	3.18	3.33	0.02
BnaA01G0051900ZS	7	9.25	5.39	10.43	11.71	4.1	6.33	9.2	7.8	8.62	7.19	7.88	29.69	31.15	29.48	29.78	27.82	27.55	29.62	29.07	29.31	32.18	31.6	28.06	7.85	8.7	6.54	11.18	8.01	10.66	8.79	6.74	6.78	6.35	6.97	5.99	20.28	21.82	22.48	26.09	26.09	25.85	18.56	18.16	19.84	12.37	10.07	10.22	12.87
BnaA01G0052000ZS	0	0	0	0	0	0	0	0.03	0	0	0	0.01	0.02	0.03	0.03	0.01	0	0	0	0	0	0	0	0	0	0	0.05	0	0	0	0.02	0.05	0.04	0	0	0	0	0	0	0	0	0	0	0	0	0	0.02	0	0
BnaA01G0052100ZS	5.96	5.85	5.6	5.51	4.76	4.91	4.96	4.69	4.72	4.75	5.14	4.88	6.11	6.32	5.48	5.12	5.02	4.72	4.41	4.5	4.45	5.33	5.21	5.32	5.06	5.13	5.65	5.51	5.31	5.62	4.79	4.56	4.63	4.05	3.92	4.14	4.85	4.1	4.32	5.01	4.57	5.21	4.04	4.48	4.21	4.22	4.69	5.01	4.86
BnaA01G0052200ZS	0	0	0.07	0	0	0	0	0	0	0	0	0	0	0	0	0	0	0	0	0	0	0	0	0	0	0	0	0.11	0	0	0	0	0	0	0	0	0	0	0	0.04	0	0	0	0	0	0	0	0	0
BnaA01G0052300ZS	0.07	0.48	0.46	0.54	0.57	0.22	0.08	0	0	0.21	0.08	0.2	1.25	0.42	0.58	0.14	0.54	0.14	0.26	0	0.16	0	0.07	0	0	0.37	0.32	0.24	0.16	0	0.08	0.24	0.09	0.15	0	0.08	0	0.31	0.25	0.08	0.15	0.38	0.24	0.54	0.28	0	0	0	0.52
BnaA01G0052400ZS	0	0	0	0.04	0	0	0	0	0	0.07	0	0.07	0	0	0	0	0	0	0	0	0	0	0.04	0	0.04	0.04	0.04	0.05	0	0	0	0.09	0	0	0	0	0	0	0	0	0	0	0	0.04	0.05	0	0	0	0
BnaA01G0052500ZS	15.79	15.43	14.91	15.19	15.92	18.66	13.48	11.25	14.98	10.56	9.7	8.44	16.13	15.86	17.33	11.51	14.66	12.78	11.72	11.07	9.73	11.65	10.74	9.55	19.38	16.76	18.73	11.29	12.02	10.73	15.03	13.24	14.15	29.02	26.12	28.4	14.67	13.48	14.8	8.56	8.91	8.76	10.12	8.42	9.72	21.7	22.74	22.61	14.56
BnaA01G0052600ZS	0	0	0	0	0	0	0	0	0	0	0	0	0	0	0	0	0	0	0	0	0	0	0	0	0	0	0	0	0	0	0	0	0	0	0	0	0	0	0	0	0	0	0	0	0	0	0	0	0
BnaA01G0052700ZS	0.13	0.19	0.6	0.69	0.73	0.17	0.12	0	0.16	0.06	0	0	0	0.34	0	0	0.38	0	0	0	0	0	0	0	0	0.52	0.34	0.58	0.45	0.62	0	0.24	0	0.2	0	0.11	0.32	0	0	0	0.75	0	0	0	0	0.24	0	0.01	0
BnaA01G0052800ZS	0.15	0.3	0.3	0.27	0.44	0.07	0.25	0.43	0.3	0.28	0.31	0.23	0.2	0.3	0.29	0.37	0.27	0.34	0.5	0.38	0.57	0.23	0.75	0.44	0.27	0.18	0.31	0.12	0.28	0.04	0.36	0.12	0.32	0.11	0	0.04	0.21	0.04	0.28	0.43	0.54	0.19	0.35	0.53	0.45	0.17	0.26	0.09	0.13
BnaA01G0052900ZS	0.2	0.33	0.36	0	2.08	1.95	0.19	0.21	0.09	0.64	0.24	0.07	0.23	0.34	0.38	0.14	0.19	0.24	0.22	0.25	0.25	0.32	0.27	0.1	1.02	0.64	0.13	0.52	1.99	2.06	0.18	0.34	0	0.3	0.9	0.4	0.47	1.01	1.62	0.31	0.4	0.37	0.32	0.24	0.22	0.48	0.68	0.12	0.26
BnaA01G0053000ZS	0	0	0	0.13	0.24	0.35	0.06	0	0.03	0	0	0	0	0	0.03	0.09	0.29	0.16	0.02	0	0	0.03	0	0.07	0	0	0	0.29	0.49	0.3	0	0	0	0	0	0.03	0	0.16	0.03	0.51	0.36	0.43	0	0	0	0	0	0.04	0
BnaA01G0053100ZS	0	0	0	0	0	0	0	0	0	0	0	0	0	0	0	0	0	0	0	0	0	0	0	0	0	0	0	0	0	0	0	0	0	0	0	0	0	0	0	0	0	0	0	0	0	0	0	0	0
BnaA01G0053200ZS	13.54	21.26	17.36	7.44	6.69	9.93	5.73	9.32	10.46	5.77	9.5	7.93	18.48	19.49	19.28	15.31	16.74	16.41	11.92	11.9	10.28	10.85	11.63	8.72	21.89	21.94	17.69	15.48	14.98	13.72	10.16	6.04	7.9	6.23	6.09	6.53	14.16	16.6	15.01	13.25	14.31	14.52	11.29	9.07	9.52	9.42	6.46	6.92	16.77
BnaA01G0053300ZS	0	0	0.62	1.16	0.03	0	0	0.44	0	2.1	0.74	0.8	0	0	0	0	0	0	0.22	0.48	0.28	0.55	0	0	0.9	1.74	0.91	1.96	0.53	1.26	1.06	0.86	1.15	2.54	3.38	1.54	0.54	0.73	0	0.27	0	0.31	0.27	0.07	0.34	0.53	0.09	0.67	1.71
BnaA01G0053400ZS	0	0.03	0	0	0	0	0	0	0	0	0	0	0	0	0	0	0	0	0.03	0	0	0	0	0	0	0.03	0.04	0.11	0	0.08	0.04	0	0	0.48	0.58	0.61	0	0.14	0	0	0.03	0	0.04	0	0	0.04	0.16	0	0.08
BnaA01G0053500ZS	0.71	0.48	0.36	0.13	0.19	0.13	0.03	0.06	0.12	0.1	0.17	0.05	0.77	0.54	0.66	0.14	0.12	0.28	0.15	0.08	0.06	0.34	0.26	0.48	0.46	0.45	0.47	0.5	0.77	0.71	0.63	0.67	0.72	0.55	0.53	0.67	0.62	0.48	0.57	0.65	0.39	0.54	0.3	0.18	0.36	0.75	0.59	0.53	0.84
BnaA01G0053600ZS	6.53	6.46	5.94	4.09	5.22	3.32	2.51	2.31	4.11	4.35	5.5	5.99	4.39	3.61	5.26	3.95	4.89	3.55	2.86	3.8	3.91	6.25	4.72	4.22	6.11	4.28	6.3	5.26	6.08	8.08	2.97	3.45	3.45	4.48	4.61	3.17	5.55	5.46	6.52	5.51	8.38	5.38	3.85	2	2.11	3.23	1.98	3.48	4.48
BnaA01G0053700ZS	0	0	0	0	0	0	0	0	0	0	0	0	0	0	0	0	0	0	0	0	0	0	0	0	0	0	0	0	0	0	0	0	0	0	0	0	0	0	0	0	0	0	0	0	0	0	0	0	0
BnaA01G0053800ZS	0.62	0.28	0	0.5	0.73	1	1.06	0	0.17	2.08	1.56	0	0	0.06	0.25	0.7	0.36	0.24	0.88	0.78	0.05	1.7	1.41	1.04	0.93	0.47	0.03	0.45	0.77	0	0.47	0.31	0.3	2.18	0	2.03	0.2	0.31	0	0.42	0	0.8	0.64	0.55	0.28	0.62	0.49	1.06	0.46
BnaA01G0053900ZS	0	0.48	0	0.06	0.28	0.3	0.57	0.83	0.8	0.38	0.69	0.41	0.77	0.39	1.4	0.1	0.82	0.26	0.58	0.54	1.4	0.58	0.45	0.53	0.24	0	0.62	2.59	2	1.82	2.31	0.67	2.3	0.46	0.82	1.07	2.13	1.04	0.88	0.84	2.06	1.28	1.7	0.95	1.47	0	0.26	0	1.5
BnaA01G0054000ZS	0.58	0.46	0.56	0.82	0.45	0.73	0.29	0.43	0.31	0.61	0.69	0.72	0.34	0.53	0.65	0.51	0.34	0.46	0.31	0.3	0.37	0.64	0.63	0.52	0.56	0.71	0.73	0.67	0.58	0.48	0.17	0.26	0.46	0.71	0.81	0.8	0.5	0.59	0.62	0.88	0.5	0.64	0.17	0.15	0.33	0.4	1.05	0.5	0.78
BnaA01G0054100ZS	1.01	1.04	1.47	1.25	1.04	1.16	1.1	1.14	1	1.7	1.28	1.27	1.74	1.4	1.57	1.32	1.09	1.2	0.69	1.35	1.19	1.69	1.65	1.37	1.29	1.52	1.46	1.35	1.29	1.13	0.82	0.85	0.94	1.45	1.46	1.35	1.69	1.6	1.71	1.43	1.17	1.27	1.12	1.13	1.29	1.52	1.15	0.76	1.08
BnaA01G0054200ZS	91.06	91.62	90.71	80.78	86.87	83.53	84.83	82.66	86.61	60.12	59.54	61.13	88.39	91.08	90.51	64.95	65.08	64.24	61.43	63.2	63.42	41.24	44.94	39.94	133.34	129.83	130.65	91.4	92.34	91.97	77.37	79.63	78.61	54.9	50.47	52.7	90.16	93.84	89.51	62.39	62.85	62.58	55.25	53.35	56.19	56.32	58.16	57.27	96.02
BnaA01G0054300ZS	0.08	0	0	0	0	0	0	0	0.1	0.25	0	0	0	0	0.13	0	0	0.39	0.44	0	0	0	0	0.55	0	0	0.1	0	0.25	0	0.1	0	0	0	0	0.11	0.09	0	0	0	0	0	0	0	0.22	0	0.11	0	0
BnaA01G0054400ZS	119.51	115.6	115.41	89.23	92.34	94.27	80.91	82.43	77.82	83.41	80.01	80.87	159.96	151.53	165.94	122.02	121.62	119.36	125.06	106.25	118.64	115.09	102.89	112.16	123.49	118.37	121.08	94.82	96.79	94.39	66.98	65.4	69.29	69.04	72.23	69.8	130.6	125	145.25	108.16	126.92	113.81	72.46	70.57	64.21	61.83	62.47	61.37	109.59
BnaA01G0054500ZS	0	0	0.03	0	0	0	0	0	0	0.03	0	0	0.06	0.09	0.41	0	0	0	0	0	0	0	0	0	0.24	0.33	0.12	0.03	0	0	0.15	0	0	0	0	0	0.35	0.93	0.48	0.11	0	0	0	0	0	0	0	0	0
BnaA01G0054600ZS	2.37	2.04	1.91	1.74	1.74	1.6	1.44	1.33	1.07	0.71	0.86	0.93	2.28	2.57	2.45	1.48	1.36	1.64	1.55	1.42	1.36	1.38	1.22	1.45	1.53	1.58	1.33	2.35	2.55	2.44	1.08	0.89	1.02	0.64	1.08	0.62	1.94	1.69	1.37	2.41	2.66	2.63	1.48	1.58	1.31	0.69	0.92	0.79	2.03
BnaA01G0054700ZS	0.78	0.88	0.42	0.94	0.92	0.9	0.63	0.72	0.54	1.26	0.99	0.92	0	0.14	0.17	0.03	0.08	0	0.03	0.08	0.04	0.1	0.14	0	1.42	1.96	1.5	3.52	4.24	4.24	0.45	1.08	0.6	2.04	1.12	1.81	0.69	0.44	1.02	0.47	0.53	0.53	0.23	0.31	0.46	0.3	0.35	0.69	2.45
BnaA01G0054800ZS	0	0	0	0	0	0	0	0	0	0	0	0	0	0	0	0	0	0	0	0	0	0	0	0	0	0	0	0	0.12	0	0	0	0	0	0	0.25	0	0	0	0	0	0	0	0	0	0.04	0	0	0
BnaA01G0054900ZS	0	0	0	0.02	0.03	0	0.02	0.03	0.02	0	0.01	0.02	0	0	0	0	0	0	0	0	0	0	0	0	0	0	0.03	0	0.14	0.12	0	0.05	0	0.01	0.04	0.02	0	0	0	0	0	0	0	0.08	0	0.03	0	0	0
BnaA01G0055000ZS	0	0	0	0	0	0	0	0	0	0	0	0	0	0	0	0	0	0	0	0	0	0	0	0	0	0	0	0	0	0	0	0	0	0	0	0	0	0	0	0	0	0	0	0	0	0	0	0	0
BnaA01G0055100ZS	0	0	0	0	0	0	0	0	0	0	0	0	0	0	0	0	0	0	0	0	0	0	0	0	0	0	0	0	0	0	0	0	0	0	0	0	0	0	0	0	0	0	0	0	0	0	0	0	0
BnaA01G0055200ZS	1.45	1.65	1.82	0.4	0.39	0.23	0.68	0.82	0.79	1.1	0.94	0.83	1.34	1.57	1.4	0.24	0.23	0.35	0.44	0.37	0.42	0.87	0.53	0.61	0.97	0.88	1.08	0.61	0.57	0.7	2.11	2.36	2.09	7.21	5.38	7.47	0.86	0.85	0.82	0.35	0.3	0.35	0.59	0.58	0.39	2.44	2.32	2.39	1.88
BnaA01G0055300ZS	0.15	0.05	0.2	1.21	1.4	1.35	2.74	1.64	1.11	1.54	1.15	0.66	0.17	0.1	0.12	1.63	1.44	2.6	1.43	1.34	2.13	1.95	1.7	1.72	0.28	0.29	0.83	3.33	1.94	1.15	2.2	1.81	2.23	0.76	1.39	1.01	0.4	0.01	0.09	2.15	3.28	1.41	2.25	3.16	2.27	0.34	0.46	0.9	0.19
BnaA01G0055400ZS	0	0.05	0.18	0.95	1.38	1.01	0.68	1.13	1.44	0.38	0.99	0.57	0	0	0.06	0.05	0.36	0.32	0.7	0.12	0	0.47	0.16	0.05	0	0	0	0.81	0.44	0.61	0.84	0.5	1.37	0.12	0.07	0.53	0	0.12	0	1.22	0.75	0.85	0.74	0.6	0.57	0.4	0.34	0.07	0
BnaA01G0055500ZS	38.64	36.54	35.37	21.55	21.71	22.38	18.69	18.53	18.22	20.81	21.48	21.31	33.6	34.58	35.42	18.87	18.06	18.66	16.2	15.58	15.72	17.29	17.32	16.65	36.17	35.24	35.35	24.59	22.58	22.21	15.91	16.99	18.43	19.45	21.97	21.75	30.18	32.66	33.23	21.31	22.13	21.21	11.9	13.83	12.02	19.28	18.68	18.48	36.14
BnaA01G0055600ZS	0	0	0	0.04	0	0	0	0	0.05	0	0	0.04	0	0	0.11	0.09	0.2	0.18	0	0	0	0	0	0	0	0	0	0.3	0.1	0.28	0.05	0	0	0	0.17	0	0.11	0	0	0.4	0.33	0.63	0	0	0.18	0	0	0	0
BnaA01G0055700ZS	73.51	69.22	70.28	68.91	85.56	84.64	30.96	32.14	29.67	17.47	17.03	15.32	47.56	53.75	57.61	73.78	66.14	63.03	33.3	32.81	39.85	11.95	10.24	15.41	51.8	47.47	43.43	55.92	56.14	48.15	36.62	40.01	40.74	21.23	25.1	24.49	48.8	50.6	53.07	40.91	57.7	38.43	39.07	33.8	34.52	17.3	18.12	17.38	73.52
BnaA01G0055800ZS	0.38	0.42	0.46	0.27	0.45	0.59	0.55	0.58	0.56	0.41	0.4	0.52	0.23	0.34	0.45	0.76	0.53	0.43	0.47	0.67	0.66	0.47	0.5	0.56	1.74	1.49	1.63	0.65	1.02	0.79	1.03	1.41	0.95	1.82	1.76	1.43	1.48	1.09	1.42	0.57	0.62	0.46	0.7	0.49	0.56	1.39	1	0.99	0.47
BnaA01G0055900ZS	0	0.68	0	0.25	0.32	0.03	0	0	0	0.81	0.36	0	0.54	0.69	0.06	0.62	1	0.68	0.74	1.09	1.12	0.52	1.24	1.08	0	0	0	0	0.01	0	0.34	0	0.01	0.15	0.29	0	0	0.08	0	0.23	0.42	0.72	0	0	0	0.45	0.37	0	0
BnaA01G0056000ZS	1.93	2.02	1.96	1.42	0.92	1.83	2.65	2.59	2.26	1.84	2.83	3.27	2.03	1.94	1.9	1.63	2.19	1.35	1.24	2.12	1.97	3.24	4.15	2.84	1.83	1.94	2.82	2.1	2.94	1.16	2.22	2.74	1.99	1.44	2.36	2.16	1.73	2.21	2.13	0.24	2.38	2.64	1.79	2.92	1.78	2.43	2.75	2.72	2.05
BnaA01G0056100ZS	13.14	10	11.38	1.64	3.92	2.55	3.81	3.43	4.09	3.89	3.82	2.85	1.71	1.97	2.63	0.97	1.12	0.71	0.83	0.88	0.1	0.46	1	0.48	12.47	13.14	11.38	8.46	8.5	9.35	3.94	4.36	4.25	2.07	2.56	1.92	4.03	5.53	5.01	0.91	2.23	1.69	0.4	0.89	0.96	3.92	3.44	3.6	13.09
BnaA01G0056200ZS	0	0	0	0	0	0	0	0.06	0	0	0	0	0	0	0	0	0	0	0	0	0	0	0	0	0	0	0	0	0	0	0	0	0.32	0.3	0	0.06	0	0	0	0	0.11	0	0	0	0	0	0	0	0
BnaA01G0056300ZS	0	0	0	0	0	0	0	0	0	0	0	0	0.16	0	0	0	0	0.28	0	0	0	0	0	0	0	0	0	0	0	0	0	0	0	0	0	0	0	0.16	0	0	0	0	0	0	0	0	0	0	0
BnaA01G0056400ZS	0.53	0.16	0.27	1.04	1.24	1.37	0.38	0.48	0	0.08	0.09	0	0.56	0.5	1.48	2.84	1.01	2.19	1.22	0.46	0.92	0.08	0	0	5.95	3.35	3.49	2.83	3.18	1.84	0.29	0.19	0.11	0	0	0.2	1.59	3.12	1.66	4.17	4.72	3.53	0.75	2.28	1.52	0.21	0.31	0.11	0
BnaA01G0056500ZS	0.76	0.86	0.53	0.59	0.78	0.62	1.57	1.49	1.62	0.81	0.83	0.84	0.67	0.59	0.58	0.52	0.67	0.59	1.01	1.34	1.44	0.59	1.01	0.82	0.9	1.29	0.94	0.65	1.02	0.62	2.38	1.97	2.22	1.64	1.74	1.67	0.78	0.91	0.93	0.93	0.72	0.65	1.32	1.81	1.38	1.33	1.32	1.3	0.8
BnaA01G0056600ZS	16.04	15.28	17.69	6.97	7.48	7.45	11.12	8.67	8.72	9.32	8.26	6.48	16.85	13.9	15.91	7.32	5.88	4.04	6.77	6	6.69	6.28	6.92	7.39	35.18	33.36	29.56	85.38	83.69	85.47	52.57	55.77	57.14	45.6	41.81	44.67	16.59	16.91	18.13	36.66	43.22	39.08	32.06	31.93	32.82	31.91	33.23	36.08	23.94
BnaA01G0056700ZS	9.54	10.15	8.75	7.34	8.46	5.05	0.23	0.86	0.55	3.6	2.04	4.04	8.59	9.48	8.6	3.94	4.4	4.73	0.78	1.27	1.1	6.04	5.51	4.46	8.93	7.7	7.31	3.79	2.51	3.54	1.01	0.29	0.49	8.79	6.78	6.8	8.68	8.21	8.94	5.85	2.64	6.43	0.75	0.25	0.32	2.63	2.99	2.77	6.24
BnaA01G0056800ZS	0.07	0	0	0	0.07	0	0.07	0.08	0.29	0	0	0.12	0.08	0	0	0	0	0	0	0.07	0	0	0	0	0.78	0.07	0.07	0.15	0.21	0.08	0	0.35	0.27	0	0	0.18	0.21	0.36	0.31	0	0	0	0	0.08	0	0.08	0	0	0.35
BnaA01G0056900ZS	191.2	178.51	182.91	186.23	209.15	217.55	213.86	209.77	210.63	140.85	139.16	137.97	166	170.36	174.85	140.88	127.68	123.22	141.12	135.6	139.44	150.25	151.33	147.61	242.09	223.15	224.5	327.31	320.45	330.04	355	389.08	380.56	264.73	285.31	276.73	148.14	146.37	162.15	244.97	285.63	260.56	259.97	235.87	232.23	177.81	171.96	159.53	150.34
BnaA01G0057000ZS	1.19	0.73	0.98	1.17	0.87	0.4	0.32	0.12	0.07	0.23	0.18	0.28	2.1	1.48	1.81	1.63	1.55	1.52	1.19	0.82	1.17	0.75	0.84	1.38	1.6	1.16	1.86	1.41	2.44	1.63	0.14	0.17	0.08	0.36	0.28	0	1.3	0.94	1.17	1.54	1.41	1.2	0.71	0.88	0.67	0.33	0.07	0.18	2.36
BnaA01G0057100ZS	0.64	1.18	0.91	0.95	1.4	1.13	0.43	0.35	0.33	1.29	1.12	1.29	1.52	0.75	0.72	1.86	1.09	1.04	0.76	1.3	0.76	1.52	0.38	1.79	1	1.45	0.86	1.72	1.49	0.65	0.27	1.3	1.4	2.47	1.78	1.28	0.45	1.09	1.25	1.86	0.64	1.49	0.34	0.58	0.79	0.65	0.09	0.8	1.4
BnaA01G0057200ZS	0.53	0.96	0.49	0	0.16	0.28	0.31	0.15	0.25	0.14	0	0.3	0.75	0.4	0.75	0.18	0.35	0.13	0.16	0.25	0.55	0.04	0.36	0.12	0.64	0.38	0.05	0.1	0.1	0.44	0.37	0.36	0.18	0.15	0.28	0.33	0.43	0.3	0.37	0.1	0.33	0.24	0.25	0.2	0.18	0	0	0	0.39
BnaA01G0057300ZS	0	0	0	0	0	0	0	0.13	0	0	0	0	0	0	0	0	0	0	0	0	0	0	0	0.09	0	0	0	0.15	0	0.01	0	0	0	0	0	0	0	0	0	0	0	0	0	0	0	0	0	0	0
BnaA01G0057400ZS	1.98	2.5	2.15	0.02	0.01	0.03	0	0.04	0	0.03	0.01	0	0.95	1.31	1.12	0.02	0.04	0.11	0.01	0	0	0	0	0	0.86	0.87	0.92	0.03	0.03	0	0.02	0	0	0	0	0	1.22	1.27	1.12	0	0.04	0.03	0.03	0.01	0.02	0	0.02	0	1.5
BnaA01G0057500ZS	0.04	0.08	0.04	0	0.05	0	0	0.05	0	0	0	0	0	0.04	0	0.04	0.27	0	0	0	0	0.09	0	0	0	0.09	0.09	0.04	0	0	0	0	0	0.04	0	0	0	0	0	0.22	0	0	0	0.04	0	0	0.05	0.06	0.05
BnaA01G0057600ZS	0	0	0	0	0.03	0.09	0	0	0	0.16	0.12	0	0	0	0	0.13	0	0	0.06	0	0	0.24	0	0	0.23	0	0.03	0	0.12	0	0.33	0.23	0.7	0	0.47	0	0.04	0	0	0	0	0	0.02	0	0.32	0.01	0.15	0.22	0.37
BnaA01G0057700ZS	8.48	8.69	8.78	6.75	7.2	7.23	5.3	4.97	5.45	4.69	4.24	4.49	7.95	8.76	8.07	7.74	8.14	8.05	6.31	5.83	6.24	4.37	5.12	4.54	7.77	7.19	8.46	12.59	11.74	11.8	5.08	5.55	4.71	4.81	4.75	4.66	6.36	6.58	6.24	8.09	8.16	8.16	5.14	5.08	5.48	4.28	4.37	4.36	9.72
BnaA01G0057800ZS	0	0	0	0	0	0	0	0	0	0	0	0	0	0	0	0	0	0	0	0.14	0	0	0	0	0	0	0	0	0	0	0	0	0	0	0	0.15	0	0	0	0.14	0	0	0	0	0	0	0	0.34	0
BnaA01G0057900ZS	0	0	0	0	0	0	0.11	0	0.17	0	0	0.05	0	0.38	0	1.32	0	0	0.4	0	0	0	0	0.47	0	0	0	0	0	0	0.04	0.51	0	0	0	0.25	0	0	0	0	0	0.4	0.24	0	0	0	0.18	1.32	0
BnaA01G0058000ZS	0	0	0	0	0	0	0	0	0	0	0	0	0	0	0	0	0	0	0	0	0	0	0	0	0	0	0	0	0	0	0	0	0	0	0	0	0	0	0	0	0	0	0	0	0	0	0	0	0
BnaA01G0058100ZS	0.29	0.32	0.38	0.47	0.51	0.31	0.33	0.38	0.39	0.82	0.75	0.55	0.39	0.32	0.21	0.28	0.27	0.32	0.22	0.28	0.27	0.46	0.26	0.34	0.38	0.37	0.22	0.52	0.73	0.71	0.24	0.31	0.36	0.5	0.54	0.65	0.29	0.18	0.29	0.21	0.32	0.2	0.17	0.13	0.28	0.34	0.42	0.44	0.37
BnaA01G0058200ZS	3.05	3.78	4.11	19.69	21.22	18.36	0.62	0.07	0.4	0	0.07	0.17	18.17	19.26	16.53	10.25	6.7	10.83	0.28	0.41	0.61	0	0	0.11	16.83	16.63	19.79	9.98	11.83	10.23	0.43	0.49	1.19	0.4	0.23	0.15	16.45	17.8	13.07	9.66	8.79	7.83	1.17	0.74	0.56	0.15	0.23	0.08	1.66
BnaA01G0058300ZS	0.22	0.3	0.22	0.79	0.95	1.06	53.69	40.81	39.62	62.07	56.55	63.32	1.26	0.72	0.61	1.01	1.7	0.5	28.77	25.2	24.51	59.65	50.05	46.41	0	0.11	0	0.82	1.43	0.63	49.46	51.88	57.36	57.21	74.81	78.76	0.25	0.45	0.48	2.87	3.46	1.23	27.48	22.05	21.93	46.26	36.23	42.11	0.63
BnaA01G0058400ZS	1.85	1.75	1.88	2.44	1.73	1.53	5.54	5.04	5.53	6.49	6.63	7.12	3.25	3.13	2.88	1.51	1.13	1.89	2.99	3.05	2.65	5.42	5.87	6.27	1.53	1.39	1.34	2.83	2.69	2.79	3.47	3.37	2.71	3.8	2.76	2.72	1.16	1.43	1.66	2.38	2.32	2.3	2.34	2.37	2.84	5.5	4.6	5.68	2.43
BnaA01G0058500ZS	0	0	0	0	0	0	0	0	0	0	0	0	0	0	0	0	0	0	0	0	0	0	0.08	0	0	0	0	0	0	0	0	0	0	0	0	0	0	0	0	0	0	0.06	0	0	0	0	0	0	0
BnaA01G0058600ZS	0.11	0	0.07	0	0	0	0.08	0.27	0.07	0.03	0.04	0	0.07	0	0	0.2	0.07	0.07	0.15	0.07	0.07	0.06	0.03	0.06	0.73	0.7	0.61	0.37	0.97	0.6	0.39	0.24	0.31	0.07	0.04	0.04	0.98	0.41	0.31	1	0.99	1.08	0	0.37	0.22	0.92	1.06	1.76	0.21
BnaA01G0058700ZS	1.63	2.08	1.86	1.79	2.2	1.3	0.89	1.26	0.83	3.98	3.71	2.47	1.07	1.24	0.72	1.02	0.85	0.78	0.44	0.58	0.64	1.26	0.7	1.16	2.68	3	2.98	3.91	3.75	5.01	0.91	0.67	1.9	5.68	3.46	2.53	1.43	0.99	1.14	0.75	0.98	1.17	0.63	0.45	0.2	2.12	1.7	1.14	2.17
BnaA01G0058800ZS	0.18	0.16	0.29	0.17	0.19	0.28	0.23	0.36	0	0.22	0.1	0.36	0.06	0.25	0.23	0.04	0	0.4	0	0.13	0.07	0.05	0.05	0	0.24	0.54	0.17	1.23	1.67	0.6	0.28	0.08	0.24	0.79	0.34	0.52	0.21	0.12	0.22	0.34	0.5	0.59	0	0.1	0.16	0.29	0.49	0.21	0.4
BnaA01G0058900ZS	0	0	3.19	0	0	0	0	0	0	1.2	0	0	0	0	0	0	0	0	0	0	0	0	0	0	0.99	0.04	0	2.19	1	0	0.34	0	0	0	0	0	0	0	0	0	0	0	0	0	0	0	0	0	0
BnaA01G0059000ZS	4.24	4.73	6.41	1.65	1.71	3.54	1.57	2.67	1.26	1.47	2.65	1.74	0	0.16	0	0	0	0	0	0	0.09	0	0	0	10.1	9.69	9.17	15.17	14.95	12.1	3.7	5.48	3.7	6.25	2.63	3.89	1.45	1.11	3.2	1.03	1.78	0.64	0	0	0	0.12	0.05	0	8.57
BnaA01G0059100ZS	0.2	0.14	0	0.38	0.61	0.28	0.24	0.52	0.29	0.12	0.43	0.34	0.14	0.42	0	1.07	1.17	0.85	1.09	1.87	0.35	0.3	0.25	0.33	0.59	0.65	0.88	2.04	2.7	3.01	0.27	0.64	1.49	0.54	0.15	0	1.26	1	1.3	2.69	2.99	3.93	0.59	1.01	0.41	0.23	0.55	0.17	0.4
BnaA01G0059200ZS	0	0	0	0	0	0	0	0	0	0	0	0	0.26	0	0	0	0	0	0	0.06	0	0	0.16	0	0	0	0	0	0	0	0	0.23	0	0	0	0	0	0	0	0	0.41	0	0	0	0	0	0	0	0
BnaA01G0059300ZS	0	0	0	0.03	0	0	0	0	0	0	0	0	0.04	0	0	0	0.04	0	0	0.16	0	0	0	0	0	0	0	0	0	0	0	0	0	0	0.04	0	0	0	0	0	0	0	0	0	0	0	0	0	0.07
BnaA01G0059400ZS	0	0	0	0	0	0	0	0	0	0	0	0	0	0	0	0	0	0	0	0	0	0	0	0.17	0	0	0	0	0	0	0	0	0	0	0	0	0	0	0	0	0	0	0	0	0	0	0	0	0
BnaA01G0059500ZS	0	0	0	0	0	0	0	0	0	0	0	0	1.2	2.25	0	1.89	1.2	0	0.19	0.97	0.24	2.37	3.42	2.98	0	0	0	0	0	0	0	0	0	0	0	0	0	0	0	2.59	0	0	0.37	0.97	1.78	0.43	0	0	0
BnaA01G0059600ZS	0	0	0	0	0	0	0.17	0	0	0	0	0	0	0	0	0	0	0	0	0	0	0	0	0	0	0	0	0	0	0	0	0	0	0	0	0	0	0	0	0	0	0	0.37	0.44	0	0	0	0	0
BnaA01G0059700ZS	0	0	0	0.06	0	0	0	0.04	0	0	0	0	0	0	0	0	0	0.03	0.06	0	0	0	0	0	0	0	0	0	0	0	0	0	0	0	0	0	0	0	0	0	0	0.07	0	0	0	0	0	0	0
BnaA01G0059800ZS	0.09	0	0	0	0	0	0	0	0	0	0	0	0	0	0	0	0	0.04	0	0	0	0	0	0.07	0	0	0	0	0	0	0	0	0	0	0	0	0	0	0	0	0	0	0	0	0	0	0	0	0
BnaA01G0059900ZS	0	0	0	0	0	0	0	0	0	0	0	0	0	0	0	0	0	0	0	0	0	0	0	0	0	0	0	0	0	0	0	0	0	0	0	0	0	0	0	0	0	0	0	0	0	0.07	0	0	0
BnaA01G0060000ZS	4.06	4.71	4.73	10.13	8.9	10.52	40.77	39.55	42.85	53.09	52.14	53.46	2.9	3.6	2.79	6.06	5.34	5.65	15.61	13.51	14.87	33.73	31.19	35.11	7.51	7.42	8.02	7.29	7.46	7.22	86.09	83.19	86	78.43	73.45	75.04	3.45	3.46	3.94	5.21	3.07	4.66	19.17	18.37	19.52	105.07	100.74	100.95	3.86
BnaA01G0060100ZS	4.53	5.02	5.05	3.97	4.24	4.04	3.71	3.53	3.82	3.35	3.2	3.13	4.73	4.6	5.16	3.88	3.83	3.65	3.41	3.14	3.34	3.21	3.87	3.46	4.14	4.86	4.41	3.89	4.1	3.91	3.49	4.03	3.46	3.75	3.63	3.45	3.94	4.3	3.63	3.47	3.12	3.24	2.81	3.41	3.39	2.66	3.1	3.36	4.78
BnaA01G0060200ZS	2.03	1.09	0.65	1.67	0.37	0.42	0.85	0.73	1.06	1.35	0.53	0.84	0	0.71	1.38	1.07	1.19	1.14	0.5	0.5	0.88	0.43	0.42	1.24	1.79	0.91	1.36	1.9	0.88	0.87	1.62	0.54	0.68	1.29	1.31	0.62	0.81	0.88	0.83	0.91	1.36	1.18	0.44	0.36	0.77	0.64	1.52	0.79	0.98
BnaA01G0060300ZS	4.01	2.46	2.27	5.71	5.06	3.26	4.93	3.93	2.24	2.45	3.97	4.78	6.33	6.68	6.96	2.42	3.22	1.35	1.68	2.64	2.59	4.27	6.14	3.11	12.59	15.25	16.1	7.21	8.96	8.36	7.67	11.02	7.85	9.61	6.96	14.31	8.41	7.57	7.45	4.3	7.39	6.27	6.02	6.25	4.85	9.76	10.65	10.21	4.8
BnaA01G0060400ZS	0.95	0	0.15	0.98	1.24	0	0	0	0.23	0	0	0	3.19	3.38	3.3	3.93	4.21	4.59	3.3	3.62	3.53	4.78	4.47	4.97	0	0.49	0.86	0	0	0	0	0	0.28	0	0	0	2.7	3.32	2.34	5.02	4.62	4.64	3.58	3.45	3.54	1.18	2.24	1.61	0
BnaA01G0060500ZS	0.09	0	0	0	0	0	0	0	0	0	0	0	0.09	0	0.3	0	0	0	0	0	0	0	0	0	0	0.09	0	0	0	0	0	0	0	0	0	0.1	0	0	0	0	0	0	0	0	0	0	0	0	0.21
BnaA01G0060600ZS	0	0	0	0	0	0	0	0	0	0	0	0	0	0	0	0	0	0	0	0	0	0	0	0	0	0	0	0	0	0	0	0	0	0	0	0	0	0	0	0	0	0	0	0	0	0	0	0	0
BnaA01G0060700ZS	2.98	3.24	3.42	1.27	1.97	1.27	1.48	2.28	1.17	1.25	0.71	0.69	4.9	3.66	4.29	2.39	3.6	3.3	2.86	2.84	2.7	2.07	1.43	1.41	3.59	3.62	3.54	1.78	3.37	3.35	0.74	1.16	1.4	0.88	0.86	0.98	4.55	2.82	4.18	2.99	3.93	2.96	0.76	1.31	1.58	0.91	1.19	1.43	3.09
BnaA01G0060800ZS	0.72	0.44	0.89	0.52	0.7	1.25	0.36	0.21	0.7	0.37	0.6	0.47	1.01	0.55	0.83	0.57	0.62	0.57	0.15	0.76	0.46	0.42	0.27	0.09	0.69	1.08	0.94	0.99	1.5	1.02	0.33	0.8	0.45	0.53	0.36	0.47	0.47	0.45	0.21	0.33	0.33	0.37	0.33	0.23	0.54	0.13	0.45	0	0.47
BnaA01G0060900ZS	1.37	1.38	2.02	0.86	0.45	0.37	0.86	0.79	1.13	0.4	0.6	0.78	1.44	1.18	0.74	0.97	0.94	0.91	0.97	0.95	1.1	1.16	0.92	1.36	1.06	2.17	2.22	1.42	1.57	1.42	0.74	1.24	0.83	0.43	0.4	0.52	1.03	1.13	0.54	1.29	1.29	1.48	0.63	0.58	0.39	0.65	0.54	0.52	2.65
BnaA01G0061000ZS	0	0	0	0	0	0	0	0	0	0	0	0	0	0	0	0	0	0	0	0	0	0	0	0	0	0	0	0	0	0	0	0	0	0	0	0	0	0	0	0	0	0	0	0	0	0	0	0	0
BnaA01G0061100ZS	0	0	0	0	0	0	0	0	0	0	0	0	0	0	0	0	0	0	0	0	0	0.69	0.31	0.38	0	0	0	0	0	0	0	0	0	0	0	0	0.02	0	0	0.57	0.29	0	0.08	0.21	0.04	0	0.03	0	0
BnaA01G0061200ZS	1.49	2.03	2.08	2.38	2.07	2.87	4.67	3.38	3.46	2.9	2.8	2.57	1.61	2.07	2.14	3.33	2.54	3.32	4.25	4.34	4.03	5.43	4.26	4.08	2.03	2.16	2.17	4.05	3.71	4.21	4.09	4.4	4.57	6.03	5.68	5.82	1.79	1.6	1.77	3.99	4.64	4.55	4.36	2.77	4.06	4.13	3.15	3.39	2.36
BnaA01G0061300ZS	0.08	0	0	0	0	0.05	0	0	0	0	0	0	0	0.09	0	0.04	0	0	0	0	0	0	0.05	0.08	0	0	0	0	0	0.22	0	0	0	0	0	0	0	0	0	0	0	0	0	0	0	0	0	0	0
BnaA01G0061400ZS	4.07	2.88	3.08	2.69	2.06	3.61	3.16	1.59	2.09	1.83	2.37	1.49	1.56	2.55	3.75	2.6	2.45	2.59	3.71	2.24	2.24	1.82	2.39	2.29	1.26	0.74	1.41	0.85	0.74	0.85	0.63	1.37	1.47	0.9	0.94	1.74	3.07	2.02	2.43	4.15	3.05	3.09	2.08	2.34	2.49	2.03	2.77	1.85	1.99
BnaA01G0061500ZS	2.87	3	3.15	3.59	3.18	4.33	2.44	2.61	2.23	2.46	2.76	3.13	4.09	4.82	4.09	4.85	4.53	4.74	3.1	3.57	3.37	2.21	2.76	2.59	1.36	1.55	1.83	1.01	0.73	0.88	1.05	0.84	1.22	0.95	1.12	1.13	4.12	3.09	4.83	2.78	2.3	2.13	3.32	3.53	3.81	3.71	3.03	3.39	1.65
BnaA01G0061600ZS	0	0.08	0	0	0	0	0	0	0	0	0	0	0	0	0	0	0	0.08	0.15	0	0	0	0	0	0	0	0	0	0	0	0	0	0	0	0	0	0	0	0	0	0	0	0	0	0	0.1	0	0	0
BnaA01G0061700ZS	0.06	0.11	0	0	0	0.12	0	0.07	0.06	0.12	0	0	0.32	0.17	0.14	0.17	0	0.23	0.05	0	0	0	0	0	0	0.12	0.13	0.07	0.07	0	0	0.07	0	0.06	0.21	0.07	0.21	0	0.2	0.13	0.12	0.06	0	0.06	0.08	0	0	0	0.43
BnaA01G0061800ZS	5.6	5.32	5.73	2.86	4.56	3.56	2.12	1.86	1.35	0.88	1.25	0.83	0	0	0	0	0	0	0	0	0	0	0	0	5.74	6.66	4.74	2.22	0.95	0	0.43	1.67	1.41	0.85	0	0.06	0	0	0	0	0	0	0	0	0	0	0	0	0
BnaA01G0061900ZS	0	0	0	0	0.05	0	0	0	0	0.05	0	0	0.05	0	0	0	0	0.05	0	0	0	0	0	0	0.05	0.05	0.16	0	0.16	0	0	0	0	0	0	0	0.17	0	0	0	0	0	0	0.05	0	0	0.06	0.06	0
BnaA01G0062000ZS	11.79	12.37	11.26	25.53	27.25	23.21	19.34	19.56	20.86	20.34	18.01	19.26	11.43	12.05	11.44	22.46	22.13	23.23	17.99	18.74	18.74	18.36	20.96	19.87	16.27	15.19	16.08	21.59	21.05	22.81	21.94	23.19	21.67	22.75	20.65	19.45	13.12	15.73	14.6	19.94	17.09	20.38	17.28	17.41	16.46	26.79	26.52	28.41	17.3
BnaA01G0062100ZS	0.09	0	0.05	0	0	0	0	0	0	0	0	0.04	0	0	0	0	0	0.04	0	0	0	0	0	0	0	0	0	0.15	0.05	0.11	0.2	0.1	0.06	0	0	0	0	0.1	0.2	0	0	0.09	0.15	0.05	0	0.32	0.05	0.29	0
BnaA01G0062200ZS	0	0	0	0	0	0	0	0	0	0	0	0	0	0	0	0	0	0	0	0	0	0	0	0	0	0	0	0	0	0	0	0	0	0	0	0	0	0	0	0	0.06	0	0	0	0	0	0	0	0
BnaA01G0062300ZS	30.13	31.82	30.6	17.07	18.56	17.65	5.55	5.14	7.06	1.01	0.74	0	31.89	35.15	31.53	21.15	20.36	21.85	15.55	13.57	15.38	5.78	8.77	7.53	35.51	31.59	31.67	20.59	16.97	20.28	10.84	11.7	12.42	10.21	10.18	9.14	28.83	27.17	28.75	14.86	17.37	16.76	11.07	12.41	11.29	2.83	2.37	2.59	35.66
BnaA01G0062400ZS	0	0	0	0	0	0	0	0.16	0	0	0	0	0.04	0	0	0	0	0	0	0	0	0	0	0	0	0	0	0	0	0	0	0	0	0	0	0	0	0	0	0	0	0	0	0	0	0	0	0	0
BnaA01G0062500ZS	0	0.01	0.01	0.01	0.03	0	0	0	0.02	0	0	0	0.03	0.02	0	0	0.03	0	0.03	0	0	0.01	0.02	0.05	0.06	0.03	0.03	0.01	0.02	0.01	0.02	0.04	0.06	0.03	0.08	0.04	0.01	0	0.03	0	0.05	0.02	0.01	0.06	0.01	0.29	0.24	0.19	0.04
BnaA01G0062600ZS	7.59	7.53	6.98	4.64	4.95	4.29	4.33	4.64	4.76	4.69	4.7	3.86	6.21	5.42	5.59	2.6	2.13	2.54	1.43	1.56	1.6	2.68	2.64	1.5	8.52	7.59	9.19	1.89	1.78	2.1	8.08	8.46	8.64	6.77	7.52	8.17	6.16	5.03	5.08	1.36	1.77	2.08	3.54	2.72	2.35	4.78	4.65	4.52	6.35
BnaA01G0062700ZS	1.29	0.79	0.85	1.4	0.76	2.33	0.69	1.26	0.52	1.28	1.47	1.07	0.87	0.99	0.62	0.77	1.07	0.68	0.91	0.79	0.83	0.72	1.03	0.94	1.08	1.27	1.04	1.13	0.55	0.93	0.52	0.51	0.85	1.18	1.21	1.86	1.18	1.08	1.33	0.86	0.87	0.5	0.2	0.59	0.28	0.94	0	0.77	1.22
BnaA01G0062800ZS	0.03	0	0	0	0	0.09	0	0.56	0.11	0.58	0.48	0.69	0	0	0	0.61	0	0.18	0	0	0	0	0	0	0	0	0	0	0	0	0	0	0	0	0	0	0	0	0	0	0.12	0	0	0	0	0.18	0.14	0.12	0
BnaA01G0062900ZS	8.62	6.97	7.62	7.24	9.1	8.55	5.83	5.27	6.34	8.32	7.56	7.65	6.9	7.31	8.1	7.25	7.3	7.23	5.57	4.4	5.63	6.46	5.79	6.06	4.13	3.47	4.36	5.39	4.26	4.66	3.14	2.76	2.63	2.72	3.79	3.55	5.93	6.28	7.22	4.8	7.22	4.94	4.39	3.51	4.69	6.13	6.31	4.89	8.2
BnaA01G0063000ZS	20.39	17.8	18.11	16.88	17.02	17.59	9.45	10.57	9.02	14.17	12.83	13.15	22.45	22.58	20.31	17.69	18.02	17.51	10.49	10.5	8.8	11.78	10.63	11.23	14.61	16.83	14.68	11.21	11.82	11.22	6.18	8.05	7.05	7.32	6.65	7.41	18.93	19.88	17.78	12.16	13.08	12.75	7.78	7.66	8.44	11.85	11.61	12.12	16.81
BnaA01G0063100ZS	1.74	1.75	1.36	1.95	1.79	1.43	2.38	1.37	2.13	0.66	1.04	1.54	1.6	0.77	0.91	0.5	1.11	1.35	0.87	0.55	0.56	1.28	1.74	1.48	3.4	2.9	3.18	5.29	6.3	5.77	6.54	5.48	4.67	4.9	5.4	5.45	1	0.46	0.78	1.55	0.54	1.38	1.92	1.24	0.98	0.91	2.6	1.52	1.49
BnaA01G0063200ZS	0	0.1	0	0	0	0.87	0	0	0	0	0	0	0	0.17	0	0	0	0.1	0.01	0.39	0.32	0	0	0	0	0	0	0	0	0.02	0	0	0	0	0	0	0	0	0.31	0	0.01	0.34	0	0	0	0.1	0	0	0
BnaA01G0063300ZS	0	0	0	0	0	0	0	0	0	0	0	0	0	0	0	0	0	0	0	0	0	0	0	0	0	0	0	0	0	0	0	0	0	0	0	0	0	0	0	0	0	0	0	0	0	0	0	0	0
BnaA01G0063400ZS	0	0	0	0	0	0	0	0	0	0	0	0	0	0	0	0	0.04	0	0	0	0	0	0	0	0	0	0	0	0	0	0	0	0	0	0	0	0	0	0	0	0	0	0	0	0	0	0	0	0
BnaA01G0063500ZS	0	0	0	0	0	0	0	0.12	0	0	0	0	0	0	0	0.14	0	0.11	0.24	0	0	0	0	0	0.12	0	0	0	0.18	0	0	0	0	0	0	0	0.13	0	0	0	0	0	0	0	0	0	0	0	0.53
BnaA01G0063600ZS	0	0	0	0	0	0	0	0	0	0	0	0	0	0	0	0	0	0	0	0	0	0	0	0	0	0	0	0	0	0	0	0	0	0	0	0	0	0	0	0	0	0	0.18	0	0	0	0	0	0
BnaA01G0063700ZS	0	0	0	0	0	0	0	0	0	0	0	0	0	0	0	0	0	0	0	0	0	0	0	0	0	0	0	0	0	0	0	0	0	0	0	0	0	0	0	0	0	0	0	0	0	0	0	0	0
BnaA01G0063800ZS	0	0	0	0.01	0.02	0	0	0	0	0	0.01	0	0	0	0	0.03	0	0	0	0	0	0	0	0	0	0	0	0	0	0	0	0	0	0	0	0	0	0	0	0	0	0	0	0	0	0	0	0	0
BnaA01G0063900ZS	0.36	0.27	0.32	0.81	1.26	0.75	0.8	0.86	0.98	0.59	0.62	0.5	0.58	0.36	0.16	2.09	2.26	2.65	2.44	2.65	2.5	2.8	2.38	1.75	0.23	0.58	0.67	1.39	0.9	0.93	1.58	1.4	1.02	1.28	0.65	0.58	0.38	0.5	0.75	1.14	1.99	0.94	1.97	2.2	2.09	0.81	1.28	1.42	0.76
BnaA01G0064000ZS	2.27	2.73	1.45	1.67	1.62	1.81	1.86	2.39	1.9	1.47	1.53	1.53	2.13	1.49	1.02	2.55	3.32	2.71	1.65	1.52	1.71	1.03	0.98	0.94	2.26	3.01	3.13	1.76	1.74	2.49	1.8	1.96	2.17	1.22	2.98	1.35	2.07	2.41	2.22	1.16	1	0.81	1.46	1.64	1.5	2.76	2.15	2.58	1.34
BnaA01G0064100ZS	0	0	0	0.58	0.75	0.4	0	0.04	0.08	0	0	0.03	0.04	0.03	0.04	0.76	0.82	0.48	0.16	0.2	0.16	0.1	0	0	0.5	0.07	0.08	4.14	3.63	3.77	0.29	0.32	0.23	0.15	0.04	0	0.13	0.08	0	2.69	2.67	2.44	0.67	0.58	0.28	0.04	0.04	0.05	0
BnaA01G0064200ZS	0	0.04	0.02	0.2	0	0.22	0.37	0.24	0.29	0.94	0.61	0.95	0.13	0.04	0.16	0.09	0.23	0.17	0.16	0.04	0.23	0.85	0.61	0.86	0.21	0.27	0.26	0.78	0.6	0.89	0.8	0.65	0.5	1.01	1.41	1.38	0.32	0.06	0.02	0.23	0.28	0.33	0.56	0.48	0.35	1.48	1.3	1	0.05
BnaA01G0064300ZS	0	0	0	0	0.2	0	0	0.16	0	0	0	0	0	0.26	0.48	0	0	0	0	0	0	0	0	0	0	0	0	0	0	0	0.34	0	0	0.44	0	0	0	0	0	0	0.2	0	0	0.3	0	0	0.16	0.16	0
BnaA01G0064400ZS	0	0	0	0	0	0	0	0	0	0	0	0	0	0	0	0	0	0	0	0	0	0	0	0	0	0	0	0	0	0	0	0	0	0	0	0	0	0	0	0	0	0	0	0	0	0	0	0	0
BnaA01G0064500ZS	0	0	0	0	0	0	0	0	0	0	0	0.24	0	0	0	0	0	0	0	0	0	0	0	0	0	0	0	0	0	0	0	0	0	0	0	0	0	0	0	0	0	0	0	0	0	0	0	0	0
BnaA01G0064600ZS	0	0.03	0.03	2.12	0.87	0	0.43	0.89	0	0.35	0.62	0.37	0	0	0	0	0.14	0.56	0.54	0.85	1.58	0	0	0	0.56	0.74	0.17	0	0	0	0	0	0	0	0	0	0	0	0	0.91	1.44	0.95	0	0	0	0	0	0	0
BnaA01G0064700ZS	0.4	0.09	0.17	0.84	0.69	0.7	0.25	0.8	0.52	0.85	0.94	1.06	0.25	0.23	0.29	1.3	0.87	0.77	1.15	0.48	0.86	1.41	1.17	1.26	0.14	0.24	0.11	0.91	0.84	1.05	0.3	0.43	0.37	0.89	0.39	1.49	0.38	0.21	0.37	1.46	1.3	1.17	1.42	0.7	0.62	0.47	0.71	0.84	0.09
BnaA01G0064800ZS	16.52	17.41	18.28	14.52	15.16	14.51	6.79	6.56	7.12	3.86	4.09	4.36	34.48	38.43	33.67	37.77	33.62	37.42	11.99	13.89	12.39	5.84	5.86	6.35	14.82	14.62	15.12	33.19	31.86	32.04	10.17	11.66	10.99	9.39	10.29	10.67	27.97	29.21	25.42	29.41	28.91	28.59	13	14.62	14.36	14.08	13.71	14.38	16.74
BnaA01G0064900ZS	0	0	0	0	0	0	0	0	0	0	0.09	0	0	0	0	0.28	0	0	0	0	0	0	0	0	0	0	0	0	0.12	0	0	0	0	0	0	0	0	0	0	0.14	0	0	0	0	0	0	0.28	0	0
BnaA01G0065000ZS	1.88	1.65	1.93	1.76	1.47	1.16	1.04	1.2	1.21	1.95	1.95	1.96	3.03	4.13	2.7	6.24	4.08	3.54	1.43	1.59	0.59	1.36	1.8	3.56	1.43	1.89	2.31	1.63	1.71	1.44	1	1.42	1.35	2.35	3.39	2.29	1.45	2.48	2.46	1.07	1.81	1.14	0.84	1.04	1.5	5.52	5.05	6.05	2.26
BnaA01G0065100ZS	9.79	10.21	10.28	19.05	18.14	17.82	4.75	5.07	5.27	3.06	3.41	3.2	14.32	16.65	14.39	25.37	25.58	25.73	9.29	8.05	7.94	4.87	4.64	4.8	11.32	12.2	11.98	13.57	13.51	13.77	4.49	5.01	4.8	3.98	3.93	3.57	14.8	12.89	13.86	12.62	13.9	13.2	7.7	7.3	6.6	4.5	5.8	4.8	12.07
BnaA01G0065200ZS	0.27	0.24	0	1.7	0	0	0	1.04	0.21	0.73	0	0	0	0	0	0.63	0	0	0.37	0	0	0	0	0	0	0	0.28	1.8	0.09	0	0	0.41	0	0.23	1.23	0	0.55	0.3	0	0	0	0	0	0	0.55	0	0	0	0.74
BnaA01G0065300ZS	0	0	0	0	0	0	0	0	0	0	0	0	0	0	0	0	0	0	0	0	0	0	0	0	0	0	0	0	0	0	0	0	0	0	0	0	0	0	0	0	0	0	0	0	0	0	0	0	0
BnaA01G0065400ZS	13.05	13.71	13.86	12.19	11.28	10.97	8.34	7.89	8.71	8.2	7.97	8.15	9.68	7.87	7.26	11.79	10.71	12.44	1.59	2.33	1.57	0	0.06	0.06	14.97	15.89	14.94	10.84	11.74	11.42	7.79	7.09	7.76	8.86	8.45	8.47	5.43	6.61	6.64	1.63	1.57	1.49	2.61	2.55	2.69	9.2	11.49	11.2	17.78
BnaA01G0065500ZS	0	0.83	0.6	15.75	12.84	12.02	0.59	0.21	0.29	0	0	0.07	2.49	0.86	2.88	16.53	15.48	20.47	0.66	0.66	0.03	0	0.09	0.15	1.66	0.48	0.52	9.06	5.94	11.94	0	0	0	0	0	0	8.46	9.61	2.58	13.77	19.08	15.27	0.79	1	1.46	0.07	0.25	0	0
BnaA01G0065600ZS	0.03	0.08	0.06	2.72	2.05	2	0.43	0.17	0.57	1.57	2.35	1.92	0.5	0.35	0.6	2.51	2.24	1.42	0.92	1.03	1.13	0.58	0.42	0.49	0.29	0.46	0.34	0.36	0.64	0.83	0.85	1.39	1.37	0.98	0.47	0.6	0.59	0.42	0.61	1.33	1.4	2.24	0.56	1.08	0.72	1.4	1.6	1.27	0.26
BnaA01G0065700ZS	0	0	0	0	0	0	0	0	0	0	0	0	0	0	0	0	0	0	0	0	0	0	0.09	0	0	0	0	0	0	0	0	0	0	0	0	0	0	0	0	0	0	0	0	0	0	0	0	0	0
BnaA01G0065800ZS	0.07	0.03	0	0	0.04	0	0	0	0	0	0	0	0.27	0.07	0	0.1	0	0	0.03	0	0	0.07	0.07	0	0	0	0	0	0	0	0	0	0	0	0	0	0.04	0.04	0	0	0.04	0	0.04	0	0.09	0	0.09	0	0.22
BnaA01G0065900ZS	2.05	1.66	1.62	1.76	1.55	1.59	1.44	1.21	1.49	1.1	0.87	0.97	1.23	1.36	1.13	1.57	1.22	1.38	0.65	0.45	0.77	0.53	0.46	0.91	1.35	1.19	1.48	1.11	1.22	1.45	0.74	0.67	0.62	0.49	0.64	0.61	0.85	0.81	0.87	0.57	0.4	0.37	0.31	0.53	0.62	0.92	1.09	0.89	1.54
BnaA01G0066000ZS	3.23	1.83	1.64	1.57	1.49	2.02	2.42	2.13	2.23	1.29	1.61	1.23	2.05	1.78	1.97	2.01	1.56	1.58	1.63	1.5	1.17	1.72	2.12	1.19	3.76	3.25	3.61	4.25	3.86	3.98	4.52	3.64	3.25	3.16	3.19	3.84	1.93	1.79	2.05	1.6	1.66	1.86	1.59	1.53	1.5	2.83	2.09	1.99	2.58
BnaA01G0066100ZS	1.84	2.27	1.77	1.67	1.5	1.76	2.12	2.51	2.5	1.74	0.73	1.28	1.55	1.47	1.46	1.07	1.13	1.57	0.96	1.57	1.26	1.21	1.29	1.47	3.13	2.61	3.11	3.68	3.41	2.95	4.54	3.75	3.04	3.19	2.53	3.44	1.77	1.9	1.62	1.51	1.92	1.59	1.34	1.84	1.83	1.5	2.16	1.67	1.94
BnaA01G0066200ZS	5.09	5.87	7.01	4.18	4.54	4.09	3.79	5.02	3.77	2.44	2.68	3.03	4.77	4.69	4.93	4.52	4.42	4.65	4.1	3.5	3.89	4.08	3.41	3.66	14.24	15.1	13.55	8.85	9.3	9.37	11.01	9.64	10.06	9.99	8.74	9.89	9.54	9.16	8.67	4.83	3.57	3.93	5.17	5.05	4.96	4.9	4.44	3.96	8.33
BnaA01G0066300ZS	0	0.25	0	0	0	0	0	0.01	0.29	0	0	0	0	0.54	0	0.32	0.18	0.54	0.09	0	0	0.35	0.39	0.51	0	0.25	0	0	0	0	0	0	0	0	0	0	0.15	0.18	0.11	0.2	0	0.11	0.06	0	0	0.02	0	0.16	0.08
BnaA01G0066400ZS	0	0	0	0	0	0	0	0	0	0	0	0	0	0	0	0	0	0	0	0	0	0	0	0	0	0	0	0	0	0	0	0	0	0	0	0	0	0	0	0	0	0	0	0	0	0	0	0	0
BnaA01G0066500ZS	3.56	4.61	5.02	2.35	1.03	2.22	0.27	1.13	1.49	0.58	0	0.18	3.89	3.08	3.64	0.71	1.34	0.86	0.99	0.97	1.03	0.56	0.31	0.43	4	2.9	2.73	2.67	2.06	2.86	0.94	0.24	1.11	0.67	0.48	0.55	0.95	0.88	2.14	1.41	2.03	1.1	0.93	0.64	1.22	0	0.46	0.41	2.58
BnaA01G0066600ZS	0	0	0.07	0	0	0	0.37	0	0.01	0.72	1.11	0.24	0	0	0	0	0	0	0	0	0	0.25	0.19	0	0	0	0	0	0.15	0	0.4	0.37	0.34	2.5	1.66	1.04	0	0	0	0	0	0	0	0	0	0.32	0.19	0.34	0
BnaA01G0066700ZS	0	0	0	0	0	0	0	0	0	0	0	0	0	0	0	2.05	0	0	0	0	0	0	0	0	0	0	0	0	0	0	0	0	0	0	0	0	0	0	0	0	0	0	0	0	0	0	0.21	0.25	0
BnaA01G0066800ZS	0.16	0.05	0	0	0	0.12	0	0	0	0.34	0	0.19	0	0	0	0	0.05	0	0	0.08	0	0.12	0	0	0.13	0	0	0.06	0.04	0	0.17	0	0	0.08	0.12	0.31	0	0	0	0	0	0	0	0	0.09	0	0.1	0	0
BnaA01G0066900ZS	0	0	0.11	0	0	0	0	0	0	0	0	0	0	0	0	0	0	0	0	0	0	0	0	0	0	0	0	0	0	0	0	0	0	0	0	0	0	0	0	0	0	0	0	0	0	0	0.02	0	0
BnaA01G0067000ZS	0	0	0	0	0	0	0	0	0	0	0	0	0	0	0	0	0	0	0	0	0	0	0	0	0	0	0	0	0	0	0	0	0	0	0	0	0.6	0.47	0	0	0	0	0	0	0	0	0	0	0
BnaA01G0067100ZS	0	0	0	0	0	0.03	0	0	0	0	0	0.02	0	0	0	0	0	0	0	0	0	0	0	0	0	0	0	0	0	0	0	0	0	0	0	0.04	0.04	0	0	0	0	0	0.04	0	0	0	0	0	0.02
BnaA01G0067200ZS	3.54	3.62	3.56	4.19	3.76	3.94	2.99	3.35	2.91	1.26	1.58	2.36	8.4	8.03	6.73	5.77	5.98	5.64	7.54	7.47	8.28	4.39	3.32	4.99	4.86	5.07	4.56	4.24	5.47	4.85	3.73	3.38	3.5	3.69	5.19	4.85	8.82	9.17	8.61	6.22	8.29	7.74	6.85	4.88	6.21	2.72	2.2	3.63	6.03
BnaA01G0067300ZS	0	0	0	0	0	0.03	0	0	0	0	0	0.02	0	0	0	0	0	0	0	0	0	0	0	0	0	0	0	0	0	0	0	0	0	0	0	0.04	0.04	0	0	0	0	0	0.04	0	0	0	0	0	0.02
BnaA01G0067400ZS	0	0	0	0	0	0	0	0	0	0	0	0	0	0	0	0	0	0	0	0	0	0	0	0	0	0	0	0	0	0	0	0	0	0	0	0	0	0	0	0	0	0	0	0	0	0	0	0	0
BnaA01G0067500ZS	0	0	0	0	0	0	0	0.1	0	0	0	0	0.47	0.29	0.35	1.12	0.74	0.94	0.19	0.46	0.29	0.04	0	0.04	0	0.13	0	0	0	0	0	0	0	0	0	0.1	0	0	0.72	0.33	0.04	0.41	0	0	0	0	0	0	0
BnaA01G0067600ZS	0	0	0	0	0	0	0.04	0	0	0.01	0	0	0	0	0	0	0.07	0	0	0	0	0	0	0	0	0.01	0	0	0	0	0.01	0	0	0.04	0	0	0	0	0.03	0	0.07	0	0	0	0	0	0	0	0
BnaA01G0067700ZS	0	0	0	0	0	0	0	0	0	0	0	0	0	0	0	0	0	0	0	0	0	0	0	0	0	0	0	0	0	0	0	0	0	0	0	0	0	0	0	0	0.09	0	0	0	0	0	0	0	0
BnaA01G0067800ZS	0	0	0	0	0	0	0	0	0	0	0	0	0	0	0	0	0	0	0	0	0	0	0	0	0	0	0	0	0	0	0	0	0	0	0	0	0	0	0	0	0	0	0	0	0	0	0	0	0
BnaA01G0067900ZS	0.25	0.06	0.08	0.27	0	0.12	0.11	0.18	0.61	0.16	0	0	0.1	0.09	0	0.29	0.07	0.16	0	0	0.16	0.28	0.56	0.04	0.05	0.12	0.38	0.53	0.19	0.4	0.13	0.36	0.2	0	0	0.06	0.28	0	0.43	0.49	0.79	0.15	0.32	0.23	0.31	0.06	0.12	0	0.48
BnaA01G0068000ZS	0	0	0	0	0	0	0	0	0	0	0	0	0	0	0	0	0	0	0	0	0	0	0	0	0	0	0	0	0	0	0	0	0	0	0	0	0	0	0	0	0	0	0	0	0	0	0	0	0
BnaA01G0068100ZS	0	0	0	0	0	0.02	0	0	0	0	0	0	0	0	0	0	0	0	0	0	0	0.22	0.1	0.02	0	0	0	0	0	0	0	0	0	0	0	0	0.05	0.05	0.02	0.14	0.24	0.36	0	0	0	0	0	0	0
BnaA01G0068200ZS	1.94	3.4	2.41	0.4	0.24	0.1	2.12	1.82	1.69	0.56	0.69	0.78	2.99	1.89	2.84	0.86	0.79	0.54	0.57	0.51	0.43	1.25	1.24	0.74	3.72	3.43	3.03	2.43	1.6	1.94	2.39	2.74	2.97	1.05	1.06	0.9	2.9	1.73	2.11	1.25	1.1	0.74	1.07	0.54	0.39	5.38	6.4	6.41	2.37
BnaA01G0068300ZS	7.96	10.92	8.08	7.82	8.58	7.53	8.98	9.9	10.17	10.76	12.63	12.07	7.14	8.77	6.01	9.04	8	8.21	8.32	8.99	6.71	10.55	9.58	9.61	6.77	8.02	9.03	6.12	7.95	4.21	6.78	7.22	6.27	12.74	11.15	9.18	7.15	7.47	7.37	6.14	7.3	7.44	4.94	7.87	5.27	10.23	10.4	11.59	8.05
BnaA01G0068400ZS	0.55	0.1	0	0.2	0	0	0	0	0	0.1	0	0	0.11	0.51	0.12	0.2	0.34	0.1	0	0	0.23	0.1	0.2	0	0.11	0.11	0.35	0.12	0.12	0.63	0	0	0.54	0	0	0	0.86	0	0	0	0.43	0.11	0.35	0.23	0.27	0	0	0	0
BnaA01G0068500ZS	0.86	1.14	1.36	0	0.42	0.62	0.72	1.27	0.79	0.03	0.77	0.54	1.15	1.46	0.61	0.45	1.14	1	0.48	0.69	1.32	0.74	0.57	0.57	0.6	0	1.23	2.78	1.91	2.33	1.09	1.79	0.96	0.12	0.72	0.68	1.56	0.61	1.32	1.25	0.41	2.34	1.21	0.62	1.33	0.44	0.52	0.72	1.79
BnaA01G0068600ZS	1.5	1.62	1.37	0	0	0.05	0	0.09	0	0	0	0.02	0.93	0.93	1.18	0.13	0.12	0.1	0	0	0	0.02	0.03	0.25	1.01	0.61	0.47	0	0	0	0	0.12	0.07	0	0	0	0.94	1.04	0.8	0	0	0	0	0	0	0.03	0.16	0	0.68
BnaA01G0068700ZS	0.04	0	0	0.03	0.25	0	0	0	0	0	0	0	0.04	0	0	0.17	0.08	0.07	0	0	0	0	0	0	0.08	0	0.24	0	0.04	0.09	0	0	0.14	0.12	0	0	0.09	0.2	0	0	0.07	0	0	0	0	0	0	0	0.05
BnaA01G0068800ZS	0	0	0	0	0	0	0	0	0	0	0	0	0	0	0	0	0	0	0	0	0	0.16	0.19	0	0	0	0	0	0	0	0	0	0	0	0	0	0.06	0	0.06	0	0.2	0.11	0	0	0	0	0	0.03	0.18
BnaA01G0068900ZS	0	0	0	0	0	0	0	0	0	0	0	0	0	0	0	0	0	0	0	0	0	0	0	0	0	0	0	0	0	0	0	0	0	0	0	0	0	0	0	0	0	0	0	0	0	0	0	0	0
BnaA01G0069000ZS	0	0	0	0	0	0	0	0	0	0	0	0	0	0	0	0	0	0	0	0	0	0	0	0	0	0	0	0	0	0	0	0	0	0	0	0	0	0	0	0	0	0	0	0	0	0	0	0	0
BnaA01G0069100ZS	0	0	0	0	0	0	0	0	0	0	0	0	0	0	0	0	0	0	0	0	0	0	0	0	0	0	0	0	0	0	0	0	0	0	0	0	0	0	0	0	0	0	0	0	0	0	0	0	0
BnaA01G0069200ZS	9.48	10.47	11.06	6.73	6.36	7.9	7.36	9.27	8.55	2.59	2.06	2.14	7.86	9.32	9.62	4.83	5.17	5.71	4.03	4.74	4.25	3.71	5.32	4.23	25.91	23.9	24.94	16.17	16.01	15.56	30.17	31.81	30.85	22.23	22.31	23.03	29.39	29.57	27.64	10.37	10.33	9.83	17.29	18.16	17.13	16.79	15.13	12.86	16.85
BnaA01G0069300ZS	0	0	0	0	0	0	0	0	0	0	0	0	0	0	0	0	0	0	0	0	0	0	0	0	0	0	0	0	0	0	0	0	0	0	0	0	0	0	0	0	0	0	0	0	0	0	0	0	0
BnaA01G0069400ZS	146.33	130.16	133.61	1.93	1.19	1.43	4.48	5.35	5.28	1.6	1.13	1.09	136.75	128.74	145.23	1.88	1.85	1.52	1.35	0.97	0.75	2.74	2.35	2.51	117.64	120.05	116.55	22.87	22.69	23.09	11.87	14.92	10.56	1.73	3.45	2.51	143.94	140.34	160.27	20.67	21.68	23.94	7.9	8.26	9.56	2.41	2.45	2.44	148.17
BnaA01G0069500ZS	0.06	0	0	0	0	0	0	0	0	0	0	0	0	0	0.03	0	0	0	0	0.12	0	0	0	0	0	0.12	0.06	0	0	0	0	0	0	0	0	0	0.13	0	0.06	0	0.03	0	0	0	0	0.03	0	0	0.1
BnaA01G0069600ZS	0	0	0	0	0	0.12	0	0	0	0	0	0	0	0	0	0	0.25	0	0.05	0.06	0	0	0	0	0	0	0	0	0	0	0.07	0	0	0	0	0	0	0	0	0	0	0.06	0	0	0	0	0.14	0	0.14
BnaA01G0069700ZS	18.58	17.8	17.28	7.92	6.78	8.71	2.18	2.95	2.84	2.94	2.76	3.17	23.17	22.52	24.44	6.73	6.47	6.8	4.4	4.12	3.65	6.83	6.82	7.23	15.2	14.17	14.84	7.08	5.89	6.17	1.28	1.46	1.13	0.8	0.67	0.65	14.36	13.92	16.37	6.12	6.47	6.17	2.49	3.26	2.68	0.7	0.55	0.64	20.31
BnaA01G0069800ZS	0.15	0.15	1.6	0	0	0	0	0	0	0	0	0	0	0.14	0.17	0	0	0	0	0	0.09	0	0	0	0	0	0	0	0	0	0	0	0	0	0	0	0	0	0	0.18	0	0.22	0.19	0	0	0	0.16	0	0.47
BnaA01G0069900ZS	5.07	2.76	4.17	4.24	6.3	5.18	6.57	6.7	8.56	9.6	7.89	8.83	3.76	3.23	2.57	6.77	4.88	7.5	11.89	11.45	11.3	20.34	16.37	18.73	8.84	8.92	9.62	11.27	11.74	12.49	17.43	17.05	15.84	24.32	29.64	24.86	7.55	7.47	6.29	11.72	12.25	9.3	10.3	8.13	7.67	12.11	14.5	12.26	5.02
BnaA01G0070000ZS	1.07	1.37	1.31	1.03	1.48	2	1.91	1.68	1.45	1.63	1.11	2.14	1.27	1.1	1.02	1.89	1.83	1.65	2.3	2.52	2.55	0.71	1.02	1.43	1.36	0.88	1.82	2.5	2.6	2.27	1.77	1.28	2.63	2.62	2.61	0	1.63	1.6	2.02	1	2.39	1.93	2.27	2.35	2.44	2.25	2.67	2.41	0.97
BnaA01G0070100ZS	0.94	0.47	1.06	0.85	0.64	0.84	0.07	0.29	0.28	0.21	0.23	0.12	0.4	0.88	0.62	0	0.12	0.37	0.09	0.16	0.29	0.39	0.26	0.42	1.53	1.54	1.56	1.61	1.95	1.74	0.23	0.41	0.09	0.67	0.46	0.32	0.77	1.13	1.32	0.98	0.68	1.51	0.37	0.37	0.31	0.51	0.28	0.39	0.79
BnaA01G0070200ZS	0	0.46	0	0	0	0.16	0.11	0.12	0.06	0.14	0.25	0.15	0.11	0.1	0	0	0.06	0	0.16	0.32	0.06	0.1	0.36	0.15	0.18	0.12	0.12	0.18	0.06	0	0.22	0.06	0.31	0.06	0.06	0	0.13	0.12	0.18	0.07	0	0.14	0	0.12	0.07	0	0.06	0.13	0.07
BnaA01G0070300ZS	0	0	0	0	0	0	0	0	0	0	0	0	0	0	0	0	0	0	0	0	0	0	0	0	0	0	0	0	0	0	0	0	0	0	0	0	0	0.2	0	0	0	0	0	0	0	0	0	0	0
BnaA01G0070400ZS	0.71	0.09	0.31	0	0	0	0	0	0	0	0	0	0	0.09	0	0	0	0	0	0	0	0	0	0	0	0.2	0	0	0	0	0	0	0	0	0	0	0.23	0	0.45	0	0	0	0	0	0	0	0	0	0
BnaA01G0070500ZS	0.04	0.2	0.12	0	0.08	0.11	0	0.08	0	0	0.29	0.21	0.41	0.15	0.3	0.29	0.08	0.25	0	0.08	0.04	0.28	0.04	0.11	0.04	0.12	0.21	2.54	3.02	3.71	0.39	0.33	0.19	1.01	1.27	1.42	0.13	0.08	0	1.51	1.78	1.64	0.12	0.16	0.1	0.05	0.28	0.05	0.09
BnaA01G0070600ZS	0	0.04	0	0.07	0.08	0	0	0.13	0.04	0.43	0.21	0.07	0.07	0.04	0.13	0.04	0.16	0	0.07	0	0.04	0.39	0.38	0.27	1	1.53	1.14	0.88	1.3	2.01	0.22	0.33	0.39	1.94	1.62	1.98	1.59	1.51	1.71	0.98	1.23	0.95	0.18	0.28	0.59	1.61	1.16	1.13	0.09
BnaA01G0070700ZS	0	0	0	0	0	0.21	0	0	0.2	0.43	0.12	0.51	0	0.14	0	0.17	0.01	0	0.03	0	0	0.13	0	0	0	0.65	0.18	0.2	1.03	0.34	0	0	0	0	1.07	0	0.53	0	0.33	0	0	0	0	0	0	0	0	0.26	0
BnaA01G0070800ZS	9.1	8.78	7.34	3.3	4.88	5.88	3.23	2.74	5.9	2.65	2.15	2.06	5.33	6.39	6.45	2.61	2.67	3.18	3.25	4.11	3.44	2.91	4.8	2.82	9.61	9.49	10.06	6.65	6.41	8.57	3.67	4.66	3.55	4.16	2.9	1.87	6.78	6.99	6.91	6.27	7.99	4.9	2.64	3.83	3.36	3.62	2.01	3.15	9.02
BnaA01G0070900ZS	0.06	0.02	0.07	0.16	0.46	0.13	0.07	0.05	0.13	0.08	0.09	0.06	0.11	0.06	0.02	0.06	0.15	0.17	0.05	0.04	0.04	0	0.08	0	0.13	0	0.11	0.07	0.12	0.05	0.02	0.05	0.03	0.13	0.44	0.29	0.05	0.04	0.07	0.11	0.17	0.26	0.11	0.04	0	0.15	0.22	0.37	0.02
BnaA01G0071000ZS	0.36	1.08	0.33	1.66	1.22	0.62	1.29	1.65	1.33	0.7	0.47	0.65	0.78	1.12	1.07	0.9	0.74	1.14	0.98	0.58	1.04	0.41	0.34	0.63	1	1.37	1.85	1.34	0.79	0.86	1.45	1.24	0.76	0.8	0.76	1.37	1.22	1.58	1.03	1.01	1.12	1.01	0.83	0.99	0.54	0	1.35	0.32	1.17
BnaA01G0071100ZS	0	0	0	0	0	0	0	0	0.05	0	0	0	0	0	0	0	0	0	0	0	0	0	0	0	0	0	0	0	0	0	0	0	0	0	0	0	0	0	0	0	0	0	0	0.05	0	0	0	0	0
BnaA01G0071200ZS	2.11	2.26	2.12	0.56	0.41	0.34	5.23	5.53	4.88	5.44	5.06	5.06	2.18	1.93	2.17	1.06	0.83	1.07	2.76	2.63	2.21	5.76	5.35	5.65	2.25	2.51	2.6	4.26	4.31	3.76	7.4	7.26	7.58	8.7	8.78	9.32	2.97	3.57	3.34	3.18	2.97	3.07	3.71	4	3.77	21.67	22	21.25	3.02
BnaA01G0071300ZS	0	0	0.03	0	0	0	0	0	0	0	0	0	0.03	0	0	0	0.03	0	0	0	0	0.09	0	0.08	0	0.03	0	0.07	0.03	0	0	0	0	0	0	0	0	0.07	0	0.02	0.06	0.03	0	0	0	0	0	0	0.11
BnaA01G0071400ZS	2.29	2.63	2.95	2.8	2.8	3.2	7.87	7.28	8.13	5.18	5.78	5.71	2.62	3.41	2.87	3.17	3.52	3.51	4.35	4.1	5.1	3.81	3.02	3.83	1.55	1.5	1.9	4.96	4.38	4	5.37	5.94	5.45	2.08	1.56	2.02	2.43	2.56	2.52	4.69	4.43	4.3	4.58	5.14	4.67	0.87	1.69	1.91	2.59
BnaA01G0071500ZS	0	0	0.02	0	0	0.13	0	0	0	0.02	0	0	0	0	0	0.06	0.02	0	0	0	0	0	0	0	0	0	0	0	0	0	0	0	0.03	0	0.05	0.05	0	0	0	0	0	0	0	0	0	0	0	0	0
BnaA01G0071600ZS	83.85	85.3	85.27	70.94	77.92	69	69.76	73.56	73.9	52.98	50.53	50.13	81.78	88.71	81.15	61.28	53.51	58.13	51.87	53.39	47.92	40.86	50.22	41.35	114.71	115.16	108.01	46.75	45.74	46.46	72.67	67.04	72.42	15.78	17.99	21.41	95.51	95.58	81.74	44.92	41.87	40.77	39.72	39.33	41.26	54.31	45.82	46.72	84.69
BnaA01G0071700ZS	0	0	0	0	0.1	0.13	0.79	0.58	0.77	0.13	0.51	0.06	0	0	0	0.07	0.49	0.06	0.64	0.71	0.84	0.3	0.58	0.22	0	0	0	0	0	0	0.45	0.58	0.34	0.35	0	0	0	0	0	0.07	0.34	0.07	0.37	0.7	0.92	0.39	0.16	0.08	0
BnaA01G0071800ZS	0.07	0	0.03	0	0	0.07	0	0	0.04	0	0	0	0.11	0.03	0.04	0.03	0.04	0.16	0.03	0.04	0.14	0	0	0	0.46	0.24	0.58	0.04	0.22	0	0.15	0.33	0.13	0.03	0.32	0	0.57	0.57	0.83	0.14	0	0.03	0.07	0.18	0.38	0.04	0.12	0.13	0.16
BnaA01G0071900ZS	4.97	4.73	3.64	1.9	1.89	2.85	2.41	1.78	1.19	1.27	0.55	1.57	2.74	3.11	5.56	3.04	1.81	1.5	1.21	0.91	1.97	1.89	1.37	1.27	2.4	2.89	2.38	2.42	1.85	2.27	0.63	1.13	0.51	1.51	3.01	2.94	2.3	3.82	3.74	1.21	2.89	1.77	1.43	1.62	1.12	2.21	1.82	1.68	5.72
BnaA01G0072000ZS	4.18	2.14	3.03	2.05	2.91	2.75	0.71	1.34	1.25	1.59	1.36	1.81	2.84	2.88	3.45	2.07	1.33	1.67	1	0.86	1.01	1	0.8	0.34	3.22	2.99	2.39	2.02	1.18	2.27	0.37	0.58	0.9	1.21	1.37	1.95	3.14	2.21	3.17	1.96	2.24	1.94	1.16	0.98	1.2	1.88	1.01	1.02	2.95
BnaA01G0072100ZS	0.84	1.11	1.09	1.56	1.52	1.5	0.62	0.71	0.72	2.3	2.33	2.44	1.27	1.22	1.1	1.43	1.22	1.2	0.91	0.68	0.57	2.28	2.32	2.26	1.41	1.29	1.23	0.69	0.54	0.61	0.71	0.69	0.78	2.96	2.66	2.82	1.17	1.14	1.01	1	0.74	0.79	0.43	0.51	0.34	2.15	2.13	2.46	1.36
BnaA01G0072200ZS	1.21	0	0	0	0	0.15	0	0.05	0.06	0.05	0.04	0	1.79	2.84	2.33	1.11	0.93	0.78	0	0.21	0.21	0	0	0	0.36	1.41	0	1.02	0.87	0	0	0.14	0.12	0	0.06	0.04	1.76	1.72	1.15	0.37	1.08	1.25	0.18	0.35	0.16	0.02	0.02	0	0
BnaA01G0072300ZS	0.37	0	1.35	3	2.35	3.06	0	1.31	0.02	0	0.23	0	0	0	0.1	0	0	0	0	0	0	0	0	0	3.59	2.84	1.75	0.72	3.46	3.15	0.13	0.39	0.59	0	0	0.28	0	0.02	1.27	0	0.9	0	0	0	0	0	0	0.06	0
BnaA01G0072400ZS	0.48	0.06	0	1.9	2.98	1.29	0	0	0.28	0	0.72	0	0	0	0.15	0	0	0	0	0	0	0	0	0.11	0.71	0	1.23	0.93	1.42	1.15	1.53	0	0.3	0	0	0.87	0.93	0	0.18	0	0.09	0	0.37	0	0.12	0.96	0.05	0	0.06
BnaA01G0072500ZS	0	0.11	0	0.14	0.59	0.54	0.03	0	0	0.05	0	0	0	0	0	0	0.12	0	0.14	0.09	0	0	0	0.03	0.32	0.74	0.2	0.51	0.58	0.13	0	0	0	0.05	0.02	0	0	0	0	0.23	0	0	0	0	0	0	0	0.16	0
BnaA01G0072600ZS	2.48	2.66	0.87	1.8	3.27	1.88	1.22	2.26	0.18	0.26	0.93	0.69	1.46	1.32	1.77	2.12	2.22	2.03	0.95	0.67	1.68	1.71	2.41	0	3.86	3.25	2.3	3.64	3.16	4.83	1.83	2.98	1.73	3.49	2.56	3.26	1.41	1.8	2.51	1.85	4	3.37	1.16	0.73	0.79	2.12	3.45	3.79	2.62
BnaA01G0072700ZS	0	0	0	0	0	0	0	0	0	0	0	0	0.25	0	0	0	0.04	0	0	0	0	0	0	0	0	0.32	0	0	0	0	0	0	0	0	0	0	0	0	0	0	0	0	0	0	0.15	0	0	0	0
BnaA01G0072800ZS	0	0	0	0	0	0	0	0	0	0	0	0	0	0	0	0	0	0	0	0	0	0	0	0	0	0	0	0	0	0	0	0	0	0	0	0	0	0	0	0	0.05	0	0	0	0	0	0	0	0
BnaA01G0072900ZS	5.49	5.05	4.56	6.51	5.86	6.71	3.59	3.33	3.39	2.79	2.76	2.7	3.56	3.85	3.21	4.09	4.44	4.31	3.16	2.88	2.52	3.06	2.63	2.67	6.46	6.29	7.35	3.17	3.48	3.49	2.72	2.96	2.55	2.05	2.41	2.19	3.63	3.37	3.47	2.45	2.15	2.36	2.87	2.43	2.47	1.64	2.1	1.77	5.86
BnaA01G0073000ZS	0.02	0.09	0.05	0.11	0	0.09	0.03	0.08	0.15	0.37	0.26	0.06	0.15	0.11	0	0	0.05	0.07	0.08	0.13	0.08	0.35	0.29	0.47	0	0.02	0.21	0	0	0.03	0	0.05	0	0	0.03	0	0	0	0.03	0.08	0	0	0.03	0.05	0.06	0.03	0.06	0.18	0.03
BnaA01G0073100ZS	0.21	0	0	0.28	0	0.5	0	0	0	0	0	0	0	0.1	0	0	0	0	0	0.33	0	0	0	0	0.54	0	0	0	0	0	0.12	0	0	0	0	0	0	0	0	0	0.21	0	0	0	0	0	0	0.13	0
BnaA01G0073200ZS	0	0.72	1.2	0.15	0	0	0	0	0	0	0	0	0	0	0	0	0	0	0	0	0	0	0	0	0	0	0.48	0	0	0	0	0	0	0	0	0	0.25	0	0.11	0	0	0	0	0	0	0	0.11	0.12	0.61
BnaA01G0073300ZS	2.1	1.72	1.64	2.72	2.52	2.3	1.27	1.58	1.12	1.36	1.4	1.19	1.19	1.36	1.44	2.06	1.9	1.72	1.04	1.16	1.18	1.01	1.24	0.87	1.7	1.4	1.62	1.31	1.56	1.53	1.22	0.89	1.22	0.8	0.8	1.03	1.09	1.03	1.11	1.05	1.44	1.62	0.72	0.46	0.78	0.54	0.67	0.76	1.15
BnaA01G0073400ZS	0	0	0	0	0	0	0	0	0	0	0	0	0	0	0	0	0	0	0	0	0	0	0	0	0	0	0	0	0	0	0	0	0	0	0	0	0	0	0	0	0	0	0	0	0	0	0	0	0
BnaA01G0073500ZS	3.4	2.98	2.61	2.64	2.16	2.58	2.73	2.45	2.24	1.74	1.26	1.42	5.43	5.31	5.64	3.82	3.92	3.19	3.52	2.55	2.05	3.81	2.75	2.04	1.53	1.01	1.81	1.24	0.84	1.53	2.39	1.84	1.91	1.2	1.36	1.2	3.87	3.1	2.64	2.24	1.6	2.07	3.32	3.08	2.56	2	2.65	2.41	2.4
BnaA01G0073600ZS	6.38	7.2	7.94	4.12	4.18	4.73	6.93	6.74	6.58	5	5.16	5.15	8.34	8.4	8.47	5.34	5.5	5.27	7.75	7.08	7.67	15.12	14.03	15.67	8.41	8.01	7.74	5.08	4.99	5.43	8.4	9.11	8.71	7.32	7.71	7.52	6.82	7.58	6.81	6.03	7.09	5.4	7.27	7.39	7.76	14.85	15.27	14.93	7.35
BnaA01G0073700ZS	0.01	0	0.06	0	0.01	0.02	0.04	0.04	0.01	0.08	0	0.02	0.13	0.19	0.08	0.25	0.17	0.12	0.09	0.12	0.12	0.12	0.13	0.14	0	0.02	0.02	0.01	0.04	0.04	0.05	0	0.03	0	0.01	0	0.01	0.22	0.1	0.12	0.11	0.09	0.07	0.15	0.18	0.07	0.09	0.24	0.08
BnaA01G0073800ZS	0	0	0	0	0	0	0	0	0	0	0	0	0	0	0	0	0	0	0	0	0	0	0	0.1	0	0	0	0	0	0	0	0	0	0	0	0	0	0	0	0	0	0	0	0	0	0	0	0	0
BnaA01G0073900ZS	0	0	0	0	0	0	0	0	0	0	0	0	0	0	0	0	0	0	0	0	0	0	0	0	0	0	0	0	0	0	0	0	0	0	0	0	0	0	0	0	0	0	0	0	0	0	0	0	0
BnaA01G0074000ZS	0	0	0.01	0.03	0.04	0.03	0.03	0.03	0.01	0	0.02	0	0.03	0.02	0.05	0.07	0.07	0.09	0.01	0.02	0.02	0.06	0.01	0.1	0	0	0	0.08	0.04	0.05	0	0.01	0	0	0	0	0.07	0.06	0.11	0.05	0.03	0.05	0.03	0.03	0.02	0.01	0.03	0.04	0.04
BnaA01G0074100ZS	0	0	0	0	0.05	0	0	0	0	0	0	0	0	0	0	0	0	0	0	0	0	0	0	0	0	0	0	0	0	0	0	0	0	0	0	0	0	0	0	0	0	0	0	0	0	0	0	0.11	0
BnaA01G0074200ZS	0	0	0	0	0	0	0	0	0	0	0	0.01	0	0	0	0	0	0	0	0	0	0	0	0	0.05	0	0	0	0	0	0	0	0	0	0	0	0.14	0	0	0	0	0	0	0	0	0	0	0	0
BnaA01G0074300ZS	0.26	0.17	0.26	0.06	0	0.09	0	0.05	0	0	0.07	0.28	0.18	0.63	0.39	0.33	0.16	0.23	0	0	0.17	0	0.22	0	0.46	0.09	0.17	0.08	0.12	0	0.11	0.16	0.39	0.14	0	0.22	0.45	0	0	0	0	0.33	0.33	0.16	0	0.18	0	0	0.12
BnaA01G0074400ZS	0	0.15	0	0	0	0	0	0	0	0	0	0	0	0	0	0	0.52	0	0	0	0	0	0	0	0	0	0	0	0	0	0	0	0	0	0	0	0	0	0.18	0	0	0	0	0	0	0	0	0	0
BnaA01G0074500ZS	0	0	0	0	0	0	0	0	0	0	0	0	0	0	0	0	0	0	0	0	0	0	0	0	0	0	0	0	0	0	0	0	0	0	0	0	0	0	0	0	0	0	0	0	0	0	0	0	0
BnaA01G0074600ZS	0	0	0	0	0	0	0	0	0	0	0	0	0	0	0	0	0	0	0	0	0	0	0	0	0	0.1	0	0	0	0	0	0	0	0	0	0	0	0	0	0	0	0	0	0	0	0	0	0	0
BnaA01G0074700ZS	2.11	2.67	2.67	3.1	2.99	2.67	0.52	1.4	0.34	0	0.17	0	2.39	1.06	1.81	1.79	1.85	2.24	0.98	1.02	0.68	0	0	0.8	2.69	1.78	2.95	6.06	8.32	6.78	1.8	2.44	1	0.66	1.32	0	2.38	2.36	1.44	6.47	4.66	10.25	1.2	0.84	0.6	2.83	2.86	1.62	1.13
BnaA01G0074800ZS	2	2.32	1.99	1.55	1.3	1.24	2.93	2.85	3.01	4.01	4.1	3.63	1.89	1.68	1.74	1.24	0.97	1.1	2.3	2.05	1.52	3.77	3.39	3.34	2.27	1.87	1.93	2.85	2.49	3.2	2.78	3.09	2.45	3.89	3.43	4.45	1.72	1.42	1.65	2.36	2.23	2.34	1.78	1.79	2.1	3.62	3.89	4.21	1.45
BnaA01G0074900ZS	9.33	7.94	10.68	5.7	5.97	7	5.21	5.26	4.73	3.06	4.14	4.67	9.39	9.31	8.98	6.6	6.25	6.13	6.18	4.13	5.59	6.94	4.58	4.79	5.91	6.65	5.76	7.38	10.66	7.06	2.81	2.45	3.06	2.72	2.65	2.67	6.44	7.99	6.45	6.67	7.22	7.55	5.25	4.86	3.61	3.24	2.09	2.93	11.73
BnaA01G0075000ZS	0.17	0.1	0.13	0.17	0.1	0.27	0.1	0.12	0.12	0.21	0.04	0.16	0.41	0.16	0	0.15	0.04	0.38	0.12	0.08	0.11	0.04	0.25	0.27	0	0	0	0.15	0.09	0.04	0.04	0.41	0.06	0	0.23	0.49	0.29	0.18	0.04	0.04	0.04	0.04	0.18	0.14	0	0.24	0	0.09	0.39
BnaA01G0075100ZS	1.38	1.5	1.44	0.69	1.63	1.35	0.46	1.49	1.77	0.5	0.8	1.13	2.24	2.72	1.19	1.48	1.35	1.08	0.73	2.26	0.68	1.72	2.22	2.11	0.56	1.83	2.41	1.59	2	2.89	2.47	1.6	0.67	1.09	0.12	0.73	1.22	2.54	1.78	1.14	0.95	1.99	2.63	1	1.58	1.49	0.89	1.08	5.2
BnaA01G0075200ZS	6.59	6.27	6.68	15.2	18.73	18.13	9.2	9.48	9.76	10.25	9.78	9.44	5.82	7.05	6.52	15.63	13.67	13.04	12.13	13.41	12.19	18.51	20.35	16.68	9.33	9.91	11.44	10.62	11.82	12.17	9.28	8.94	9.34	14.89	16.28	13.74	7.36	7.97	7.26	10.41	10.53	10.81	11.12	9.11	11.33	19.82	23.76	20.46	11.81
BnaA01G0075300ZS	2.29	2.37	2.84	1.87	1.99	2.6	1.22	1.18	1.08	0.92	1.15	1.27	8.38	8.81	8.01	7.36	8.39	7.49	4.72	4.21	4.27	4.41	4.97	4.63	2.19	2.12	1.69	1.95	1.55	1.94	1.01	1.07	0.62	0.94	0.91	0.62	7.56	6.68	6.94	5.49	5.72	5.18	3.87	2.65	3.66	3.44	2.71	3.06	4.82
BnaA01G0075400ZS	0	0	0	0	0	0	0	0	0	0	0	0	0	0	0	0	0	0	0	0	0	0	0	0	0	0	0	0	0	0	0	0	0	0	0	0	0	0	0	0	0	0	0	0	0	0	0	0	0
BnaA01G0075500ZS	3.06	2.32	2.6	5.98	4.93	6.07	1.65	3.11	1.06	1.74	1.34	2.01	4.61	3.17	2.94	3.17	2.25	3.91	2.34	2.71	2.87	1.81	3.17	4.75	0.69	3.13	0.35	3.95	1.96	1.07	1.79	1.08	0.94	0.34	1.17	1.43	4.19	3.96	3.63	4.21	4.63	5.62	2.73	1.55	3.11	2.27	3.25	1.03	7.02
BnaA01G0075600ZS	0.02	0.06	0.06	0.24	0.47	0.18	0.02	0	0.02	0	0	0	0.2	0.39	0.21	0.4	0.27	0.21	0.11	0.04	0.07	0	0	0	0.75	0.5	0.49	0.07	0.2	0.14	0.09	0.04	0.08	0.06	0.02	0.07	0.4	0.55	0.3	0.02	0.1	0.02	0.02	0.06	0.03	0.1	0.05	0.03	0
BnaA01G0075700ZS	3.01	2.03	2.04	2.7	1.52	1.02	2	1.16	2.21	1.04	1.5	2.09	2.6	4.1	3.71	2.57	2.33	2.92	2.38	2.41	1.45	2.62	2.77	2.6	1.59	1.3	1.71	0.9	2.16	0.88	1.52	2.07	1.57	2.93	2.22	2.49	3.4	2.84	2.53	1.87	1.1	1.93	1.5	2.73	2.28	3.3	3.44	3.22	0.88
BnaA01G0075800ZS	13.15	13.76	13.75	14.79	16.29	17.35	7.72	9.94	8.35	2.98	3.24	2.67	9.73	10.53	9.5	5.02	4.93	4.38	1.08	1.12	1.95	5.07	5.13	4.23	224.15	208.76	210.6	72.83	75.64	70	118.28	122	125.57	55.76	58.99	58.11	158.54	158.87	174.63	22.5	28.5	23.16	59.49	56.14	57.53	22.08	19.85	21.17	34.6
BnaA01G0075900ZS	0	0	0	0	0	0	0	0	0	0	0	0	0.18	0	0	0	0	0	0	0	0	0	0	0	0	0	0	0	0	0	0	0	0	0	0	0	0	0	0	0	0	0	0	0	0	0	0	0	0
BnaA01G0076000ZS	0	0	0	0	0	0	0	0	0	0	0	0	0	0	0	0	0	0	0	0	0	0	0	0	0	0	0	0	0	0	0	0	0	0	0	0	0	0	0	0	0	0	0	0	0	0	0	0	0
BnaA01G0076100ZS	1.01	0	0.5	0.22	0	0.27	0	0	0	0.04	0.18	0.24	0.12	0.43	0	0.17	0	0.19	0	0.44	0.17	0.58	0.5	0.54	0	0.67	0	0	0	0.37	0.05	0	0	0	0.34	0.1	0.05	0.23	0.83	0.43	0.5	0.1	0	0	0	0	0	0.27	0.57
BnaA01G0076200ZS	0	0	0	0	0	0	0	0	0	0	0	0	0	0	0	0	0	0	0	0	0	0	0	0	0	0	0	0	0	0	0	0	0	0	0	0	0	0	0	0	0	0	0	0	0	0	0	0	0
BnaA01G0076300ZS	0.61	0.05	0.15	0.34	0.29	0.11	0.11	0	0.16	0.35	0.28	0.83	0	0	0.03	0.07	0	0	0	0	0	0	0	0	0.27	0.33	0.06	0	0	0.03	0.18	0.1	0.03	0	0.11	0	0.03	0.03	0	0	0	0	0	0	0	0	0	0	0.37
BnaA01G0076400ZS	0	0.07	0	0	0.1	0	0	0	0	0	0	0	0	0	0	0.09	0.05	0	0.02	0	0	0	0	0	0	0.05	0	0	0	0	0	0	0	0.42	0.25	0.11	0	0	0	0	0.02	0	0.03	0	0	0	0	0	0
BnaA01G0076500ZS	6.18	4.02	7.38	3.4	4.28	3.6	1.47	2.03	1.42	1.77	1.21	1.79	5.54	2.79	4.35	2.2	1.69	2.43	0.97	0.52	1.7	0.9	0.47	0.31	8.16	6.16	4.29	1.18	3.71	2.19	1.37	2.43	1.57	2.05	2.1	3.3	1.98	2.87	3.89	0.66	1.24	1.29	1.33	0.91	0.61	1.16	0.58	0	2.93
BnaA01G0076600ZS	7.67	8.68	9.37	5.77	7.18	6.24	5.6	7.33	5.74	4.46	4.08	5.16	3.86	4.92	5.01	2.01	1.46	3.1	1.49	1.9	2.18	1.02	0.99	0.78	10.96	11.11	11.39	20.73	18.62	20.12	9.52	7.16	7.25	2.6	3.01	2.74	3.43	4.92	3.72	3.49	4.15	4.2	1.1	1.46	1.46	2.48	2.78	3.23	8.12
BnaA01G0076700ZS	0.91	1.26	0.93	1.22	0.67	0.9	1.1	0.89	0.62	0.49	0.99	0.12	1.19	1.45	1.38	1.71	1.07	1.23	0.71	0.86	0.75	1.76	1.74	0.76	0.64	0.49	0.64	0.66	1.1	1.28	0.51	0.51	1.02	0.32	1.44	2.08	1.63	2.79	2.46	0.87	0.92	0.74	1.64	1.28	0.51	0.48	1.21	0.77	0.6
BnaA01G0076800ZS	0	0.05	0	0.1	0	0.06	0.2	0	0.24	0.32	0.22	0.3	0	0	0.07	0	0.35	0	0	0	0.06	0	0	0.19	0.53	0	0.29	0.42	0.5	0	0.06	0.3	0.35	0.35	0.2	0.06	0.19	0	0.06	0.12	0.17	0	0.06	0	0	0	0	0	0.2
BnaA01G0076900ZS	1.02	1.14	1.05	0.41	0.42	0.46	0.3	0.14	0.28	0	0.06	0.04	1.54	1.07	1.39	0.72	0.55	0.98	0.09	0.46	0.4	0	0.22	0.16	0.3	0.1	0.32	0.13	0.46	0	0.14	0.07	0	0	0	0	0.12	0.43	0.51	1.37	0.11	0.23	0.12	0.3	0.39	0.15	0.08	0	0.6
BnaA01G0077000ZS	3.79	4.78	4.1	6.1	4.3	6.34	1.55	2.35	2.29	3.94	4.75	3.8	6.02	6.43	3.83	5.87	4.31	3.27	2.25	3.35	3.18	4.86	5.37	5.24	8.17	8.2	6.05	3.86	3.58	3.51	2.42	2.53	1.53	9.77	8.71	8.65	7.89	8.35	5.33	5.01	4.99	5.13	1.92	2.17	1.57	4.14	4.63	4.45	7.2
BnaA01G0077100ZS	3.66	4.28	3.33	3.04	2.43	2.66	3.19	3	2.39	3.46	3.27	4.71	4.25	4.44	1.3	3.13	1.94	2.66	2.53	2.46	4.03	3.72	4.54	4.55	2.86	3.11	1.71	1.66	2	1.87	1.84	2.72	2	2.48	4.56	4.06	4.82	4.6	5.51	4.3	3.2	4	3.98	3.25	3.45	6.3	4.78	4.62	3.19
BnaA01G0077200ZS	0	0	0	0	0	0	0	0	0	0	0	0	0	0	0	0	0	0	0	0	0	0.21	0	0	0	0	0	0	0	0	0	0	0	0	0	0	0	0	0	0	0.28	0	0	0	0	0	0	0	0
BnaA01G0077300ZS	0	0	0	0	0	0	0	0	0	0	0	0	0	0	0	0	0.06	0	0	0	0	0	0	0	0	0	0	0	0	0	0	0	0	0	0	0	0	0	0.25	0	0	0	0	0	0	0	0	0	0
BnaA01G0077400ZS	0	0	0	0	0	0	0	0	0	0	0	0	0	0	0	0	0	0	0	0	0	0	0	0	0	0	0	0	0	0	0	0	0	0	0	0	0	0	0	0	0	0	0	0	0	0	0	0	0
BnaA01G0077500ZS	0	0	0	0	0	0	0	0	0	0	0	0	0	0	0	0	0	0.01	0	0	0	0	0	0	0	0	0	0	0	0	0	0	0	0	0	0	0.01	0	0	0	0	0	0	0	0	0	0	0	0
BnaA01G0077600ZS	0	0.03	0	0	0	0	0	0	0.07	0	0	0	0	0	0	0	0	0	0	0	0	0	0	0	0	0	0	0	0	0	0	0	0	0	0.04	0	0	0	0	0	0	0	0	0.03	0	0	0	0	0
BnaA01G0077700ZS	1.03	0.78	0.51	0.43	0.19	0.34	0.35	0.95	0.41	1	1.85	1.65	1.65	1.57	1.44	0.67	0.92	0.65	0.45	0.85	0.77	1.66	1.13	1.14	1.02	1.33	1.36	0.71	1.62	0.95	1.63	1.7	0.86	2.67	2.76	2.6	2.3	1.97	2.2	1.53	2.74	2.66	2.22	1.54	1.61	2.61	2.29	2.98	0.94
BnaA01G0077800ZS	1.87	1.16	0.7	1.08	0.83	1.97	1.18	0.64	0.88	0.8	0.91	1.66	0.36	0.95	0.19	0.36	0.09	0.31	0.29	0.09	0.09	0	0	0	1.32	1.1	1.27	0.82	0.83	0.98	1.04	0.27	1.79	0.35	0.79	1.45	0	0.09	0	0	0	0	0	0	0	0.1	0	0	1.58
BnaA01G0077900ZS	2.09	1.3	1.63	1.73	1.41	1.67	1.92	0.48	2.99	0.45	0.63	0.78	0	0.87	0.48	0.18	0.39	0.6	0.71	0	0	0.34	1.29	0	1.59	1.82	1.82	0.84	3.1	2.28	2.25	1.34	1.04	1.38	1.21	0.58	0	0.46	0.4	0.79	0.37	0.34	0	0.94	0.3	0	0.22	0.66	3.34
BnaA01G0078000ZS	0	0.94	0.82	0.53	0.92	1.76	0.3	0	0.46	0.02	0.51	0.51	0.2	0.91	1.11	1.49	0.3	0.8	0.36	0.69	0.3	0.59	0.37	0.84	0.36	0	0.25	1.44	0.43	0.15	0	0	0.3	0.52	0.15	1.42	0.07	0.34	0.53	0.68	1.51	0	0	0.1	0.22	1.33	0.26	0.54	0.16
BnaA01G0078100ZS	0.11	0	0.11	0.11	0.1	0.08	0	0	0.53	0.54	0.3	0.37	0	0.11	0	0.4	0	0.3	0	0.46	0	0.3	0	0.59	0.68	0.22	0.2	0	0.6	0	0.24	0	0.14	0.47	0.51	0.62	0.12	0.12	0.13	0.12	0.43	0.11	0.89	0.26	0.43	0.52	0.14	0	0.12
BnaA01G0078200ZS	16.55	15.58	16.15	4.34	5.01	4.51	3.41	3.02	3.41	3.18	2.56	3.06	13.11	15.01	14.1	7.75	8.24	7.77	6.87	5.55	6.37	5.9	5.95	4.95	5.42	6.34	5.38	3.92	3.28	3.2	4.06	3.57	3.92	4.77	4.42	4.46	14.35	14.44	13.4	7.21	6.41	6.33	6.37	5.07	5.61	5.59	5.07	5.91	13.57
BnaA01G0078300ZS	0	0	0	0	0	0	0	0	0	0	0	0	0	0	0	0	0	0	0	0	0	0	0	0	0	0	0	0	0	0	0	0	0	0	0	0	0	0	0	0	0	0	0	0	0	0	0	0	0
BnaA01G0078400ZS	0.22	0.13	0.11	0.02	0	0.02	0	0.04	0	0	0	0.02	0.06	0.05	0.04	0.02	0.06	0	0.05	0	0	0.02	0.02	0	0.04	0.09	0.06	0	0.02	0	0	0.04	0	0	0.02	0	0	0	0.06	0	0	0	0	0	0	0	0.04	0.02	0
BnaA01G0078500ZS	0	0.06	0	0	0	0	0	0	0	0	0	0	0.03	0.06	0	0	0	0	0	0	0	0	0	0	0	0	0	0	0	0	0	0	0.04	0	0	0	0.04	0	0	0	0	0	0	0	0	0	0	0	0
BnaA01G0078600ZS	0	0	0	0	0	0	0	0	0	0	0	0	0	0	0	0	0	0	0	0	0	0	0	0	0	0	0	0	0	0	0	0	0	0	0	0	0	0	0	0	0	0	0	0	0	0	0	0	0
BnaA01G0078700ZS	0	0	0.09	0	0	0	0	0	0	0	0	0	0	0	0	0	0	0	0	0	0	0	0	0	0	0	0	0	0	0	0	0	0	0	0	0	0	0	0	0	0	0	0	0	0	0	0	0	0
BnaA01G0078800ZS	0	0	0	0	0	0	0	0	0	0	0	0	0	0	0	0	0	0	0	0	0	0	0	0	0	0	0	0	0	0	0	0	0	0	0	0	0	0	0	0	0	0	0	0	0	0	0	0	0
BnaA01G0078900ZS	5.93	4.92	5.37	5.58	4.47	5.32	2.37	2.54	2	1.57	1.46	1.19	1.2	1.82	2.1	3.58	3.55	3.31	1.87	1.52	1.56	1.17	1.3	1.63	1.64	1.99	1.62	3.72	5.26	5.13	1.78	1.29	0.38	0.61	0.22	0.34	0.9	0.08	1.06	2.13	3.2	0.73	1.42	1.29	1.18	1.02	0.8	1.08	4.9
BnaA01G0079000ZS	0	0	0	0	0	0	0	0	0	0	0	0	3.61	6.33	4.89	7.38	2.58	0	3.39	4.07	3.24	1	5.03	6.72	0	0	0	0	0	0	0	0	0	0	0	0	1.58	14.45	8.81	11.84	10.76	4.69	4.11	5.05	6.5	10.73	3.87	1.58	0
BnaA01G0079100ZS	0	0	0	0	0	0	0	0	0	0	0	0	0	0	0	0	0	0	0	0	0	0	0	0	0	0	0	0	0	0	0	0	0.2	0	0	0.09	0	0	0	0	0	0	0	0	0	0.19	0	0	0
BnaA01G0079200ZS	24.72	25.94	23.62	7.74	13.28	15.71	14.43	16.5	17.82	9.2	8.44	9.79	37.34	39.13	42.53	15.78	18.52	20.07	18.78	13.8	17.76	20.31	18.17	19.64	8.06	6.68	12.37	10.43	8.2	9.46	16.56	15.53	18	11.78	12.26	12.06	17.43	15.97	13.03	11.23	9.47	11.88	12.34	13.26	12.84	9.52	13.11	14.8	10.69
BnaA01G0079300ZS	0	0	0	0	0	0	0	0	0.08	0	0	0	0.63	0.08	0.33	0.11	0	0	0.21	0	0	0.04	0.03	0	0	0	0	0	0.29	0	0	0.07	0.07	0	0	0.07	0	0.86	0.92	0	0.57	0.37	0	0.22	0.07	0.19	0.07	0.22	0
BnaA01G0079400ZS	0.07	0.08	0.16	1.02	1.03	0.93	0.67	0.93	0.86	0.37	0.25	0.32	0	0	0.05	1.37	1.55	2.17	1.27	1.21	1.4	0.34	0.26	0.8	0	0.08	0.05	1.38	2.57	1.24	1.35	1.25	0.61	0.42	0.56	0.34	0.44	0.13	0.22	2.44	2.07	2.84	1.51	1.4	1.65	0.67	0.39	0.47	0.18
BnaA01G0079500ZS	0.04	0.02	0.06	0	0	0	0	0	0	0	0.04	0	7.44	6.26	7.33	3.65	3.46	3.3	2.6	2.64	1.91	2.3	2.47	1.78	0	0	0	0	0	0.02	0	0	0	0.02	0.02	0	4.82	4.55	4.77	1.77	1.7	1.4	1.63	1.49	1.27	0.63	0.99	0.48	0.82
BnaA01G0079600ZS	5.42	5.63	6.35	9.79	10.93	8.75	7.18	7.51	7.57	4.51	5.22	5.68	7.23	7.29	6.87	8.29	7.59	7.42	6.3	8.06	7.07	4.86	5.3	3.91	7.82	7.41	7.64	6.97	7.09	7.18	6.59	5.55	7.11	3.11	3.22	2.29	5.71	6.1	4.97	6.38	6.05	6.09	8.18	8.75	7.67	4.51	4.33	4.4	5.59
BnaA01G0079700ZS	1.75	2.11	2.18	28.54	31.87	31.85	72.91	71.84	75.54	45.28	38.44	40.78	3.7	3.58	4.18	47.01	48.43	45.24	65.99	67.42	65.79	121.19	122.58	117.46	2.53	2.97	2.85	62.71	65.76	64.28	112.19	110.83	113.66	209.09	218.63	202.68	4.67	5.63	6.13	76.56	88.13	82.51	116.38	108.39	107.3	186.02	172.98	179.25	2.81
BnaA01G0079800ZS	0	0	0	0	0.03	0	0.03	0	0.03	0	0.03	0	0	0	0	0	0	0	0.03	0	0	0	0	0	0	0	0	0	0.07	0	0.07	0	0.16	0	0	0.07	0	0	0	0	0	0	0	0	0	0	0	0	0
BnaA01G0079900ZS	0	0	0	0	0	0	0	0	0	0	0	0	0	0	0	0	0	0	0	0	0	0	0	0.31	0	0.33	0	0	0	0.31	0	0	0	0	0	0.27	0.33	0	0	0	0.14	0	0	0	0.34	0	0	0	0
BnaA01G0080000ZS	0.03	0.12	0.15	0.97	0.82	0	0	0	0.02	0	0.07	0	1.53	0	0.47	1.91	1.6	0.94	0.1	1.01	0.52	0.09	0	0.1	0	0.06	0.32	0.51	0.64	0.74	0.24	0.11	0.03	0	0.34	0.17	1.62	1.03	1.84	0.99	1.5	0.89	0.72	0	0.49	0.84	0.12	1.14	0.34
BnaA01G0080100ZS	0.13	0.17	0.06	0.02	0.07	0.24	0.21	0.11	0	0.04	0.04	0.14	0.07	0.05	0.04	0.08	0.22	0.22	0.09	0.12	0.02	0.02	0.22	0.14	0	0	0	0.04	0.04	0.04	0	0.09	0.07	0.06	0	0.02	0.08	0.15	0.14	0.16	0.27	0.16	0.12	0.02	0.18	0	0.09	0.04	0
BnaA01G0080200ZS	0	0	0	0	0	0	0	0	0	0	0	0	0.1	0	0	0	0	0	0	0	0.06	0	0	0.26	0	0	0	0	0	0	0	0	0.1	0	0	0	0	0	0	0	0	0	0	0	0	0	0	0	0
BnaA01G0080300ZS	3.64	3.85	5.23	5.31	4.74	3.95	4.76	3.17	4.75	2.88	3.38	2.87	5.26	5.91	6.62	5.15	4.99	5.8	5.42	5.6	6.07	6.74	7.77	6.73	3.6	4.08	3.08	2.95	3.42	4.1	4.74	2.64	4.39	3.38	2.36	1.98	3.41	3.73	4.21	6.13	4.28	5.63	4.61	4.55	4.15	4.53	3.77	3.35	3.57
BnaA01G0080400ZS	1.36	1.86	1.63	4.14	4.1	3.86	0.15	0	0	0	0.15	0	1.5	1.35	1.29	4.49	3.99	4.07	0.29	0	0.41	0.03	0	0	1.21	2.57	1.31	1.76	2.11	1.97	0.12	0.28	0.62	0.88	0.53	1.24	1.83	1.16	2.28	1.81	1.39	1.52	0.63	0	0.54	0	0.52	0.86	1.78
BnaA01G0080500ZS	4.41	3.44	4.29	1.7	1.46	1.62	0.47	0.5	0.46	0.23	0.43	0.16	1.2	1.45	0.84	0.06	0.35	0.3	0.13	0.03	0.09	0	0	0	2.56	2.76	3.15	0.57	0.5	0.66	0.41	0.48	0.67	0.7	0.23	0.21	1.18	1.44	1.61	0.2	0.04	0.02	0.2	0.04	0.06	0.05	0.05	0	3.69
BnaA01G0080600ZS	0	0.02	0	0	0	0	0	0	0	0	0	0	0	0	0	0	0.02	0	0	0	0	0	0	0	0	0	0	0	0	0	0	0.02	0	0	0	0	0	0	0	0	0	0	0	0	0	0	0	0	0
BnaA01G0080700ZS	0	0	0	0	0	0	0	0	0	0	0	0	0	0	0	0	0	0	0	0	0	0	0	0	0	0	0	0	0	0	0	0	0.17	0	0	0	0.15	0	0	0	0	0	0	0	0	0	0	0	0
BnaA01G0080800ZS	8.56	8.72	8.32	7.92	8.23	8.05	5.08	4.9	6	4.08	4.62	3.44	9.38	7.26	7.19	9.39	6.62	10.87	5.72	6.59	6.35	6.55	5.47	6.49	9.91	7.9	9.42	6.48	4.04	4.98	5.59	6.88	7.21	6.72	5.91	6.01	9.34	10.26	10.89	5.85	7.33	6.6	6.96	8.5	6.4	7.75	8.71	6.64	11.23
BnaA01G0080900ZS	0.45	0.42	0.41	0.05	0.03	0	0	0	0	0	0	0	0.17	0.05	0.09	0.07	0.08	0	0	0	0	0	0	0	0.12	0.7	0.4	0	0.06	0	0	0.11	0	0.08	0	0.03	0.06	0.03	0.27	0	0.05	0	0	0	0	0	0	0	0.24
BnaA01G0081000ZS	0.15	0.28	0.39	0.14	0.35	0.15	1.05	0.98	1.26	0.65	1.3	1.35	0.56	0.5	0.51	7.36	5.84	7	17.52	14.46	16.68	35.3	31.87	33.02	0	0.08	0	0.08	0	0	2.03	2.45	1.32	2.1	2.48	2.6	0	0.24	0.08	2.56	4.07	4.61	18.1	15.68	19.77	31.81	28.2	26.34	0.09
BnaA01G0081100ZS	5.45	9.48	7.8	3.71	6.14	9.54	5.08	3.11	4.32	1.2	5.5	5.18	34.43	37.75	33.82	24.4	22.44	26.43	20.36	20.5	20.01	23.1	25.17	24.37	4.56	6.94	0.01	0	0	0.01	6.78	7.2	0.52	4.33	4.42	3.02	32.3	32.9	29.84	23.1	25.32	25.92	23.45	20.43	17.73	17.75	20.38	20.32	9.68
BnaA01G0081200ZS	2.15	1.57	2.16	1.87	1.77	2.51	1.28	0.63	0.75	0.08	0.55	0.12	2.09	1.13	1.52	1.13	1.33	1.58	0.85	0.57	0.46	0.32	0.33	0.41	3.07	3.5	3.05	1.11	0.74	0.79	0.67	0.65	1.09	0.96	0.84	0.32	1.41	1.9	1.61	0.82	0.73	0.47	0.26	0.19	0.55	0.17	0	0.09	1.92
BnaA01G0081300ZS	1.7	2.09	2.66	0.89	2.3	2.3	1.22	1.94	2.56	1.08	1.93	1.26	8.58	7.61	8.43	5.25	5.86	5.69	3.74	3.48	3.2	4.64	4.11	4.36	2.52	2.21	1.38	1.18	2.3	2.51	0.34	0.64	0.75	0.68	1.05	0.92	7.55	6.99	8.17	7.43	7.96	7.61	4.46	3.49	3.53	2.26	2.76	1.54	2.9
BnaA01G0081400ZS	0	0	0	0	0.63	0.42	0	0	0.1	0.13	0	0	1.69	0	0	2.45	1.32	2.86	0	0.46	0.56	0.32	0.73	0	0	0.1	0	1.12	0	0.9	0.09	0	0.25	0	0.4	0.13	3.43	3.9	3.52	0	1.82	0.79	0.49	1.05	1.42	1.26	0.68	0.39	0.9
BnaA01G0081500ZS	3.27	3.28	3.56	6.09	5.15	5.18	0.19	0.16	0.13	0.05	0.1	0.09	7.17	6.37	6.11	4.86	4.81	5.01	0.39	0.44	0.48	0.11	0.15	0.08	4.42	4.98	5.53	2.88	2.7	2.62	0.22	0.27	0.26	0.11	0.14	0.14	6.06	6.32	5.27	3.14	2.72	2.77	0.19	0.29	0.37	0.11	0.03	0.05	3.18
BnaA01G0081600ZS	0.03	0.09	0	0	0	0.03	0	0	0	0	0.1	0	0	0	0	0.23	0.23	0.15	0	0	0.03	0	0	0	0	0	0	0	0	0	0	0	0.12	0.03	0	0.14	0	0.03	0.04	0	0	0	0	0	0	0	0	0	0.04
BnaA01G0081700ZS	3.73	3.17	2.82	5.1	3.73	3.9	2.67	3.09	1.98	3.56	2.74	3.24	4.56	3.98	5.28	4.52	3.75	4.16	2.94	3.68	2.96	4.73	4.11	4.72	4.25	4.03	5.18	2.46	3.18	2.89	2.83	2.17	2.66	3.98	3.09	3.51	4.2	3.72	4.45	2.88	3.05	3.72	1.69	2.04	2.16	2.69	2.59	2.62	5.08
BnaA01G0081800ZS	2.95	2.08	3.32	0.48	0.69	0.31	0.42	0.4	0.55	0.2	0.28	0.4	2.03	2.12	1.71	0.17	0.22	0.17	0.16	0.11	0.14	0.36	0.4	1.04	1.29	0.79	0.93	1.04	0.86	0.86	0.32	0.2	0.1	0.16	0.06	0.09	0.89	0.85	0.7	1.09	0.76	1	0.11	0.14	0.13	0.3	0.4	0.26	1.7
BnaA01G0081900ZS	0.21	0.36	0.39	0.19	0.29	0.29	0.17	0.55	0.37	0.26	0.33	0.25	0.26	0.33	0.18	0.09	0.28	0.16	0.15	0.14	0.15	0.46	0.3	0.34	0.21	0.4	0.17	0.55	0.39	0.8	0.25	0.43	0.53	0.38	0.58	0.32	0.07	0.08	0.23	0.32	0.29	0.38	0.22	0.29	0.38	0.38	0.42	0.18	0.21
BnaA01G0082000ZS	0	0	0	0	0	0	0	0	0	0	0	0	0	0	0	0	0	0	0	0	0	0	0	0	0	0	0	0	0	0	0	0	0	0	0	0.04	0	0	0	0	0	0	0	0	0	0	0.04	0	0
BnaA01G0082100ZS	0	0	0.09	0.06	0	0.19	0	0	0.07	0	0.14	0.03	0	0	0	0	0.27	0.18	0.08	0.03	0	0	0	0	0	0	0	0	0.07	0	0	0	0	0	0	0	0	0.13	0	0	0.13	0.07	0.03	0.13	0.04	0	0	0	0.12
BnaA01G0082200ZS	0.12	0.45	0.21	0.11	0.04	0	0	0	0	0	0	0	0.17	0.15	0.14	0	0	0	0	0	0	0	0	0	0	0.12	0.09	0.13	0.04	0	0	0	0	0	0	0	0.05	0.34	0.14	0.13	0.2	0	0.09	0	0	0	0.05	0	0.14
BnaA01G0082300ZS	0.48	0.48	0.38	0.38	0.17	0.2	0.34	0.4	0.71	0.4	0.45	0.38	0	0.54	0.24	0.68	0.38	0.83	0.14	0.29	0.28	0.24	0.4	0.48	0	0.26	0.06	0.28	0.23	0.12	0.35	0.34	0.55	0.32	0.37	0.18	0.12	0.16	0.29	0.22	0.05	0.11	0.61	0.49	0.13	1.67	1.72	0.92	0.37
BnaA01G0082400ZS	0	0.02	0	0	0	0.05	0	0.07	0.06	0	0	0	0	0	0	0	0	0	0	0	0	0.18	0	0.06	0.06	0	0.05	0	0	0	0	0	0	0.47	0.08	0.31	0.07	0.13	0	0	0.23	0.12	0.13	0	0	0	0	0.15	0.02
BnaA01G0082500ZS	0	0.02	0.02	0.24	0.11	0.05	0	0.03	0	0.02	0	0	0	0.02	0.16	0.54	0.79	0.65	1.02	0	0.48	1.36	1.25	1.03	0.2	0.17	0.52	0.08	0.21	0	0	0	0	0	0	0.25	0.82	0.35	0.14	1.37	3.25	1.59	0.3	0.64	0.37	2.42	0.44	0.39	0.03
BnaA01G0082600ZS	0.64	0.66	0	0.48	0.63	0.82	0.59	0.22	0.15	1.11	1.28	1.25	0	0.44	0	0	0.21	0.01	0	0	0	0	0	0	0.96	0.39	0.54	2.27	0.89	1.2	0.74	0.51	1.33	0.62	1.4	1.21	0.44	0	0	0	0.51	0.92	0	0	0	0.11	0.09	0	0.46
BnaA01G0082700ZS	7.92	7.51	7.97	0	0.03	0.24	0.06	0.03	0	0.03	0.07	0	10.89	10.03	11.12	0.08	0	0.06	0.03	0	0.1	0	0	0.13	2.02	1.34	1.59	0.03	0.02	0.07	0.03	0.13	0.11	0.02	0.25	0.1	1.3	1.73	1.75	0	0.02	0	0	0.09	0.04	0.14	0.04	0.02	22.58
BnaA01G0082800ZS	21.8	21.55	19.44	21.71	24.96	25.03	21.56	22.09	21.97	16.84	15.91	16.89	18.47	19.65	21.37	23.17	21.82	24.75	25.42	24.51	24.27	22.22	21.41	20.84	20.57	20.61	21.17	21.57	22.08	22.8	20.19	19.82	21.3	12.03	10.23	11.11	18.34	15.64	20.59	19.36	19.01	20.35	19.58	19.85	19.92	10.39	10.58	9.99	19.34
BnaA01G0082900ZS	2.87	1.82	2.27	1.26	1.67	2.16	1.18	1.14	1.66	1.82	1.81	1.68	5.53	5.87	6.09	4.44	3.78	5.23	2.84	3.11	3.01	2.14	1.81	2.24	2.4	2.31	3.73	3.22	3.12	3.97	2.72	3.03	3.21	3.55	3.97	3.61	4.6	6.34	5.34	10.46	9.9	10.57	3.02	3.27	3.33	5.55	4.13	4.38	2.47
BnaA01G0083000ZS	31	33.37	27.55	50.1	38.43	44.18	21.69	25.72	20.47	4.13	4.83	3.81	32.9	29.88	34.87	57.21	49.1	48.15	25.98	29.89	26.35	3.08	2.44	5.1	24.57	21.81	23.41	53.7	47.62	46.3	19.3	21.84	20.19	2.5	3.3	3.21	25.36	23.09	28.3	39.9	44.26	34.79	30.76	31.33	27.91	2.58	2.7	2.49	22.87
BnaA01G0083100ZS	0	0	0	0	0	0	0	0	0	0	0	0	0	0	0	0	0	0	0	0	0	0	0	0	0	0	0	0	0	0	0	0	0	0	0	0	0	0	0	0	0	0	0	0	0.05	0.34	1.25	0.58	0
BnaA01G0083200ZS	0	0	0	0	0	0.03	0.03	0	0.13	0	0	0	0.03	0	0	0	0	0	0.07	0	0.03	0	0.02	0	0.05	0	0	0.06	0.03	0	0.17	0.14	0.03	0.16	0.48	0	0.03	0	0	0.03	0	0	0.25	0.08	0.13	0	0	0	0
BnaA01G0083300ZS	0	0	0	0	0	0	0	0	0	0	0	0	0	0	0	0	0	0	0	0	0	0	0	0	0	0	0	0	0	0	0	0	0	0	0	0	0	0	0	0	0.1	0	0	0	0	0	0	0	0
BnaA01G0083400ZS	5.95	6.27	6.03	3.44	3.08	3.09	4.13	3.84	3.85	4.86	4.75	5.02	5.23	4.89	4.94	3.43	3.42	3.83	2.85	3.02	3.18	4.39	4.89	4.57	4.31	4.58	4.6	2.98	3.05	3.36	4.46	4.67	3.78	4.02	2.96	3.76	5.05	4.57	4.91	3.39	2.8	3.39	3.14	2.96	2.69	3.9	3.53	3.98	6.81
BnaA01G0083500ZS	0.05	0	0.55	0.36	0.38	0.2	0	0.73	0.42	0.09	0	0	0	0	0	0.2	0	0	0	0	0	0	0	0	0.13	0	0	0.65	0.96	0.13	0.68	0.44	2.12	0.16	0	0	0	0	0.11	0.1	0	0	0.21	0	0.31	0.23	0	0	0.23
BnaA01G0083600ZS	0.02	0.02	0	0	0.05	0.02	0.02	0	0	0	0	0	0.05	0.12	0	0	0	0	0	0	0	0	0	0	0.07	0.04	0.02	0.09	0	0.05	0	0	0	0	0	0	0	0	0.12	0.02	0	0.02	0	0.11	0	0	0	0	0.03
BnaA01G0083700ZS	0	0	0	0	0	0	0	0	0	0	0	0	0.04	0	0.02	0.04	0.02	0	0	0	0	0	0	0	0	0	0	0	0	0	0	0	0	0	0	0.09	0	0.03	0.07	0	0	0	0	0	0	0	0	0	0
BnaA01G0083800ZS	0.07	0.11	0.02	0.02	0	0	0	0.04	0	0	0	0	0.06	0.13	0.04	0.02	0.06	0	0	0	0	0	0	0	0	0	0	0.02	0.04	0	0.04	0.04	0.18	0	0	0.06	0.02	0	0	0.02	0	0	0.08	0.15	0.13	0.02	0	0.02	0.06
BnaA01G0083900ZS	5.66	5.46	6.34	9.38	8.05	7.69	1.72	3.6	1.85	1.01	1.08	1.27	3.82	4.13	5.46	9.44	8.24	8.47	2.82	3.24	4.42	1.6	0.56	0.98	3.21	3.45	3.06	6.57	7.38	6.46	2.18	1.66	1.48	0.49	0.49	0.82	1.54	3.32	1.91	5.45	4.49	4.96	3.61	3.68	3.75	1.04	0.56	0.52	3.88
BnaA01G0084000ZS	23.65	24.65	22.78	8.86	6.23	6.55	6.03	4.67	3.12	1.35	1.68	1.63	61.6	46.77	44.93	20.84	21.32	23.24	18.35	11.24	14.09	2.76	3.23	1.85	8.05	8.93	10.81	4.07	4.04	1.88	2.11	3.16	2.19	1.32	0.28	1.09	28.4	28.8	23.13	15.29	14.38	11.69	8.41	12.56	9.77	1.35	1.12	1.94	4.85
BnaA01G0084100ZS	0.34	0.58	0	0.14	0.89	0.5	1.24	0.3	1.09	1.24	0.98	0.32	0	0.1	0	1.11	0.74	1.2	1.21	1.17	1.41	0.76	0.72	0.68	0	0.1	0	0.16	0.14	0.16	0	0.29	0	0	0.22	0	0.15	0	0.33	1.93	0.56	0.25	0.41	1.42	0.95	0	0	0.16	0
BnaA01G0084200ZS	0.03	0.07	0.12	0.12	0.05	0.17	0.07	0.02	0	0.11	0.15	0.06	0.07	0.04	0.2	0.06	0.17	0.12	0.03	0.03	0.03	0.06	0.03	0.14	0.03	0.11	0.08	0.05	0.15	0.28	0.14	0.05	0.02	0.08	0.06	0.07	0.13	0.12	0.12	0.12	0.02	0.15	0.02	0.07	0	0	0.04	0	0.45
BnaA01G0084300ZS	0	0	0.34	0	0.25	0	0	0.04	0.08	0	0.03	0	2.53	1.92	2.37	1.46	2.82	1.04	1.76	1.7	1.39	1.67	1.37	0.47	0.6	0.71	0.21	0	0.12	0	0	0.19	0	0.2	0.13	0.13	1.54	2.63	1.79	1.52	1.72	2.47	0.43	2.04	1.51	1.16	0	1.25	0
BnaA01G0084400ZS	0	1.55	2.85	0	0	2.45	1.82	0	0	0	0	0	3.24	2.51	1.83	2.06	2.59	1.85	0.74	0.99	2	2.99	0.48	2.13	0	3.73	3.85	3.61	3.45	2.74	1.01	0	0	1.97	4.23	0	0.42	2.65	3.11	2.02	1.15	1.3	1.17	1.57	2.3	1.79	1.99	1.96	3.31
BnaA01G0084500ZS	0.32	0.21	0.31	0.48	0.32	0.41	0	0	0	0	0	0.02	0.52	0.49	0.61	0.14	0.21	0.16	0	0.03	0	0	0	0	0.54	0.4	0.51	1.17	1.01	0.91	0.06	0	0.06	0.2	0.26	0.11	0.22	0.16	0.08	0.18	0.1	0.23	0.03	0.03	0	0	0.03	0	0.23
BnaA01G0084600ZS	0	0	0	0	0	0	0	0	0	0	0	0	0.16	0	0	0	0	0	0	0	0	0	0	0	0	0	0	0	0	0	0	0	0.34	0	0	0	0	0	0	0.53	0	0	0	0	0	0	0	0	0
BnaA01G0084700ZS	0	0	0.03	0	0	0	0.64	0.62	0.77	0.25	0.14	0.38	0	0	0.06	0.22	0.27	0.12	1.02	1.46	1.88	1.18	1.23	0.93	0	0	0	0.03	0	0	1.03	1.39	1	0.62	0.64	0.75	0.06	0.03	0.03	0.14	0.08	0.08	1.62	1.42	1.23	0.31	0.4	0.43	0
BnaA01G0084800ZS	7.75	11.19	14.08	8.25	7.7	9.92	900.57	828.66	821.44	1809.83	1759.02	1732.1	12.94	10.49	9.45	78.64	72.74	67.67	2243.68	1924.98	2250.46	4217.89	3344.33	4088.52	3.07	1.64	0.26	29.83	36.69	27.97	673.08	745.03	680.25	1115.01	1396.67	1316.41	3.64	3.69	8.02	104.82	132.31	104.01	2026.69	2007.78	1933.72	3485.51	3274.68	3177.68	9
BnaA01G0084900ZS	2.29	0.98	1.71	3.07	1.02	1.95	1.27	1.89	1.59	5.19	2.79	3.07	9.37	7.41	8.88	10.6	10.08	8.68	5.48	6.56	4.84	16.41	19.03	15.04	0.93	0.53	1.7	2.48	1.71	3.03	1.07	2.45	0.98	3.98	4.51	3.92	6.79	6.52	7.42	10.58	10.09	9.56	3.54	2.84	4.59	9.06	8.83	8.41	0
BnaA01G0085000ZS	0	0	0	0	0	0	0.04	0	0.27	0	0	0	0	0	0	0	0	0	0.03	0.15	0.15	0	0	0.03	0	0	0	0	0	0	0.08	0	0	0.19	0	0.12	0	0	0	0.04	0	0.04	0.12	0.11	0	0	0.17	0	0
BnaA01G0085100ZS	0.01	0.04	0.01	0.04	0.01	0.03	0.02	0.03	0.03	0.08	0	0.01	0.06	0.06	0.08	0.09	0.12	0.05	0.01	0.01	0.06	0.04	0.02	0.04	0.03	0.02	0.03	0.2	0.16	0.14	0.1	0.13	0.19	0.13	0.05	0.01	0.12	0.17	0.14	0.19	0.2	0.22	0.08	0.08	0.05	0.27	0.2	0.29	0.03
BnaA01G0085200ZS	0.04	0.21	0.14	0.41	0.24	0.04	0	0.05	0	0.21	0.34	0.24	0.61	0.88	1.05	0.25	0.18	0.21	0.08	0.05	0.09	0.56	0.5	0.4	0.33	0.13	0.14	0.43	0.2	0.21	0.35	0.19	0.06	0.18	0.31	0.1	0.3	0.33	1	0.08	0.36	0.28	0.49	0.88	0.39	0.52	0.26	0.22	0.47
BnaA01G0085300ZS	0	0	0	0	0	0	0	0	0	0.05	0	0	0	0.05	0.06	0	0	0	0	0	0	0	0	0	0	0	0	0	0.06	0.06	0	0	0	0	0	0	0	0	0	0	0	0	0	0	0	0	0	0.07	0
BnaA01G0085400ZS	25.53	28.56	27.1	22.15	22.33	20.97	12.69	13.1	13.64	11.02	10.98	10.47	29.52	31.52	30.06	22.08	22.54	21.96	13.05	14.73	13.88	16.19	17.52	14.78	27.5	28.56	29.32	16.32	17.27	16.39	17.63	16.24	15.03	13.9	12.75	13.04	27.8	28.15	26.05	16.33	17.28	16.39	15.14	14.8	15.28	16.33	15.7	14.81	24.69
BnaA01G0085500ZS	0	0	0	0	0	0	0	0	0	0	0	0	0	0	0	0	0	0	0	0	0	0	0	0	0	0	0.16	0	0	0	0	0	0	0	0	0	0	0	0	0	0	0	0	0	0	0	0	0	0
BnaA01G0085600ZS	11.41	11.33	11.96	5.6	5.07	6.88	3.33	2.85	3.99	2.71	2.91	2.15	10.56	10.39	8.51	3.48	4.55	3.82	2.86	1.81	2.13	2.71	2.2	3.1	11.83	10.19	9.3	3.91	3.05	5.61	1.84	2.11	3.93	2.55	2.64	2.07	8.17	7.87	7.19	2.3	2.92	2.48	2.08	1.56	1.05	1.4	1.33	0.66	12.92
BnaA01G0085700ZS	1.63	1.26	1.33	0.8	1.54	1.7	0	0.1	0	0	0	0.06	3.04	1.82	3.27	1.4	2.76	3.07	0.42	0.2	0	0.17	0.32	0	1.67	1.61	1.85	0.68	0.82	0.79	0.16	0.08	0	0	0.11	0	3.86	1.24	2.38	0.79	0.83	0.43	0.1	0.33	0.13	0.18	0	0	1.73
BnaA01G0085800ZS	0	0	0	0	0	0	0	0	0	0	0	0	0	0.09	0	0	0	0	0	0	0	0	0	0	0	0	0	0	0	0	0	0	0	0	0	0	0	0	0	0	0	0	0	0	0	0	0	0	0.08
BnaA01G0085900ZS	0	0	0	0	0	0	0	0	0	0	0	0	0	0	0	0	0	0	0	0	0	0	0	0	0	0	0	0	0	0	0	0	0	0	0	0	0	0	0	0	0	0	0	0	0	0	0	0	0
BnaA01G0086000ZS	19.45	21.23	24.59	33.08	34.83	31.28	5.34	4.25	5.21	5.41	5.91	3.77	32.7	54.33	45.7	18.53	26.41	21.06	5.19	6.18	6.92	2.27	5.48	3.67	56.82	51.9	54.29	21.57	19.42	17.49	9.09	6.86	8.86	2.7	4.81	2.49	29.85	37.6	31.05	14.45	21.29	10.7	6.5	6.4	7.15	2.41	4.3	1.81	21.58
BnaA01G0086100ZS	0	0	0	0	0	0	0	0	0	0	0	0	0	0	0	0	0	0	0	0	0	0.11	0	0	0	0	0	0	0	0	0	0	0	0	0	0	0	0	0	0	0	0	0	0	0	0	0	0	0
BnaA01G0086200ZS	1.4	2.23	1.47	2.43	2.82	2.32	1.89	1.11	0.98	0.35	0.71	0.66	2.85	2.34	2.3	0.97	1.24	0.38	0.32	0.26	0.43	5.04	3.46	5.04	7.36	7.14	7.16	10.87	11.73	11.04	10.1	10.92	10.72	17.66	20.29	21.1	4.15	5.94	5.5	3.72	4.98	3.5	4.35	4.56	3.59	3.24	3.92	5.36	2.45
BnaA01G0086300ZS	0.41	0.25	0.42	0.29	0.15	0	0.88	0.86	0.57	0	0	0.12	0.1	0.34	0.46	0.17	0.19	0.08	0.08	0.33	0.19	0.57	0.64	0.54	1.66	1.74	1.33	3.57	2.75	5	2.99	2.81	2.84	6.19	8.83	8.1	1.26	0.3	0.35	2.8	2.26	1.9	3.35	3.07	2.75	7.81	5.92	6.63	0.42
BnaA01G0086400ZS	5.36	5.21	7.53	4.6	3.89	3.94	3.62	4.08	2.09	3.64	2.86	3.92	18.05	18.1	17.69	10.29	11.01	10.75	9.94	8.95	9.68	9.1	11.74	8.94	3.49	5.39	5.44	3.66	3.77	4.78	2.5	2.65	2.26	4.06	5.11	3.35	13.92	12.12	15.71	9.09	8.46	8.35	7.57	8.45	7.49	5.77	6.78	8.25	6.48
BnaA01G0086500ZS	1.55	1.1	1.73	3.99	4.18	4.08	1.95	1.67	2.2	2.66	2.61	2.57	4	2.13	1.89	7.52	4.02	6.73	2.17	0.47	2.21	3.78	1.19	3.08	2.38	1.66	0.88	1.57	1.82	0.46	1.59	1.27	1.69	3.51	3.22	3.11	4.21	5.66	3.72	1.12	2.4	0	1.33	0	1.64	0	0	0.58	1.34
BnaA01G0086600ZS	0	0	0	0	0	0	0	0	0	0	0	0	0.05	0	0.11	0.08	0.05	0.04	0.08	0	0	0.13	0.09	0.26	0	0	0	0	0	0	0	0	0	0	0	0	0.23	0.45	0.1	0.16	0	0	0.05	0	0.24	0	0.06	0	0
BnaA01G0086700ZS	0.04	0	0	0	0	0.03	0.04	0.08	0	0	0.2	0.04	0.32	0.21	0.12	0.31	0.23	0.29	0.06	0	0.12	0.57	0.17	0.34	0	0	0	0.04	0	0	0	0	0	0.04	0	0.08	0.22	0.21	0.04	0.12	0.33	0.19	0.08	0.04	0.23	0.12	0.09	0	0.04
BnaA01G0086800ZS	0	0.04	0	0	0	0	0.74	0	0	0	0.08	1.22	0.11	0.12	0.07	1.51	2.15	0.79	3.38	3.22	3.14	4.98	4.51	5.5	0.02	0	0.02	0	0.16	0	0	0.13	0.53	1.26	0	0.34	0.05	0.02	0.07	1.01	0.73	1.23	1.92	2.37	1.34	4.15	3.16	3.19	0
BnaA01G0086900ZS	0.77	0.4	0.48	0.05	0.03	0.03	0	0.13	0.15	0.2	0.13	0.08	0.31	0.19	0.56	0.38	0.15	0.16	0.08	0.03	0.06	0.08	0.08	0.15	0.21	0.12	0.13	0.35	0.32	0.21	0.07	0.13	0.07	0.15	0	0.17	0	0.31	0.2	0.06	0.03	0.12	0.19	0.18	0.11	0.03	0.1	0.04	0.41
BnaA01G0087000ZS	2.89	3.46	4.18	1.15	1.68	1.3	0.71	0.94	0.76	0.45	0.41	0.8	1.7	1.87	2.4	1.08	1.39	0.97	0.51	1.05	0.87	0.74	0.28	0.71	0.31	0.62	1.04	0.75	0.82	0.5	0.52	0.85	0.74	0.2	0.45	0.63	1.97	1.25	0.83	0.95	0.58	0.71	1.03	0.83	0.78	0	0	0.27	2.18
BnaA01G0087100ZS	0.95	1.24	0	4.17	3.91	3.21	0.13	0.05	0.02	0.06	0.04	0.09	1.48	1.75	0.54	2.33	1.29	3.37	0.27	0.23	0.36	0.15	0.17	0.09	1.12	1.28	1.15	0	0.58	1	0.07	0.17	0.06	0.06	0.01	0.04	1.55	2.12	1.55	0	2.26	0	0.21	0.39	0.29	0.01	0.08	0	1
BnaA01G0087200ZS	3.86	3.69	3.98	4.04	4.02	4.02	1.74	1.81	2.01	3.43	3.19	3.63	4.09	3.94	4.07	2.66	3.11	3.1	2.15	1.79	2.17	3.24	3.72	4.02	2.69	2.62	2.19	1.77	1.76	2.14	1.12	0.94	1.22	2.6	2.47	2.79	2.88	2.98	3.04	2.25	1.97	2.11	0.88	1.18	0.7	1.63	1.76	1.65	4.1
BnaA01G0087300ZS	2.51	0.63	1.27	2.5	1.23	1.39	0.81	1.25	1.69	0.66	0	0.1	1.72	0.79	0.79	0.74	1.15	0	0.56	0.27	0.67	0	1.29	1.69	39.66	40.06	31.98	14.11	12.6	14.43	26.38	26.18	27.9	13.01	16.08	15.07	13.15	15.21	10.27	1.44	4.37	4.94	4.34	8.22	3.11	6.09	1.81	4.79	1.46
BnaA01G0087400ZS	0.26	0.1	0.16	0.06	0.21	0.17	0.32	0.19	0.07	0.07	0.04	0.09	0.1	0.28	0.36	0.35	0.2	0.28	0.26	0.29	0.18	0.48	0.35	0.54	0.06	0.3	0.18	0.72	0.16	0.08	0.09	0.13	0.1	0.22	0.04	0.12	0.24	0.23	0.22	0.24	0.55	0.24	0.19	0.33	0.18	0.24	0.13	0.06	0.23
BnaA01G0087500ZS	4.33	2.46	2.79	4.76	3.6	3.77	2.85	3.91	2.58	3.12	3.19	4.19	3.85	4.68	4.29	4.24	2.77	3.93	2.61	1.95	3.13	4.92	2.62	3.88	2.39	2.85	2.98	1.58	2.21	1.93	2.1	2.97	3.12	2.92	3.64	4.04	1.92	2.75	2.95	1.55	1.5	0.42	2.03	2.11	2.23	2.18	2.78	3.54	5.47
BnaA01G0087600ZS	3.01	1.51	4.06	2.78	3.72	3.23	1.6	2.96	2.35	2.08	1.8	1.62	0	0	0	0	0	0	0	0	0	0	0	0	3.36	1.76	3.14	3.9	2.84	3.48	0.83	1.59	1.77	2.68	3.32	1.49	0	0.1	0.4	0	0	0	0	0	0.11	0	0	0.13	2.46
BnaA01G0087700ZS	3.1	2.38	3.27	0.96	0.42	0.69	0.72	0.44	0.54	0.65	0.39	0.86	3.69	3.5	4.06	2.21	1.49	2.11	0.92	2.11	1.5	2.89	2.52	3.88	3.92	3.24	3.97	2.82	1.83	2.74	1.15	2.05	1.23	0.27	0.17	0.54	2	2.35	1.82	3.2	1.88	3.32	0.51	2.03	1.27	0.64	0.19	0.09	5.83
BnaA01G0087800ZS	0	0.79	0	0.66	0	0.33	0.2	0.12	0.21	0.15	0	0.64	0.86	0.1	0.51	0.32	0.46	0	0.34	0.3	0.47	0	0.22	0.3	0.32	0	0.06	0.04	0.19	0.06	0.05	0	0	0.05	0	0.11	0	0.76	0.66	0.25	0.42	0.74	0.41	0	0.13	0.12	0.03	0.06	0
BnaA01G0087900ZS	0	0	0	0	0	0	0	0	0	0	0	0	0	0	0	0	0	0	0	0	0	0	0	0	0	0	0	0	0	0	0	0	0	0	0	0	0	0	0	0	0	0	0	0	0	0	0	0	0
BnaA01G0088000ZS	0	0	0	0	0	0	0	0	0	0	0	0	0	0	0	0	0	0	0	0	0	0	0	0	0	0	0	0	0	0	0	0	0	0	0	0	0	0	0	0	0	0	0	0	0	0	0	0	0
BnaA01G0088100ZS	0.08	0.3	0.42	0.44	0.24	0.12	0.05	0	0.19	0.16	0.1	0	1.9	1.16	1.46	1.42	1.64	1.71	1.94	1.39	1.61	1.89	1.95	2.03	0.08	0.19	0.14	0.16	0.09	0.1	0.04	0.12	0	0	0.04	0	0.48	0.66	0.47	1.46	2.46	1.61	0.51	0.58	1.04	0.12	0.34	0.09	0.13
BnaA01G0088200ZS	34.37	29.22	35.78	24.26	18.73	21.16	9.23	9.04	9.14	12.29	9.76	12.56	25.06	24.23	19.12	12.19	10.99	12.45	8.63	8.46	9.49	14.82	11.17	7.88	0.95	0.76	0.75	1.27	1.53	2.06	0.39	0.72	0.81	0.73	0.92	0.71	24.55	21.49	21.07	17.66	19.03	17.96	6.91	7.48	10.3	4.68	3.52	6.6	2.13
BnaA01G0088300ZS	1.84	1.89	2.38	1.68	1.5	1.53	1.32	1	1.21	1.34	1.05	0.97	6.69	5.29	5.83	2.75	3.59	2.99	3.11	2.39	2.02	3.35	4.02	3.99	1.15	1.13	1.23	0.94	1.37	1.33	0.76	1.04	0.68	1.08	0.91	1.43	2.88	3.11	3.21	2.69	4.45	3.09	2.15	2.05	2.3	1.79	1.5	1.7	1.39
BnaA01G0088400ZS	0	0	0	0	0	0	0	0	0	0	0	0	0	0	0.04	0	0	0	0.08	0	0	0	0	0	0	0	0	0	0	0	0	0	0	0	0	0	0	0	0	0	0	0	0	0	0	0	0	0	0
BnaA01G0088500ZS	0	0	0	0	0	0	0	0	0	0	0	0	0	0	0	0	0	0	0	0	0	0	0	0	0	0	0	0	0	0	0	0	0	0	0	0	0	0	0	0	0	0	0	0	0	0	0	0	0
BnaA01G0088600ZS	0	0	0	0	0	0	0	0	0	0	0	0	0	0	0	0	0	0	0.03	0	0	0	0	0	0	0	0	0	0	0	0	0	0	0	0	0	0	0	0	0	0	0	0	0	0	0	0	0	0
BnaA01G0088700ZS	18.71	16.59	18.89	22.98	23.54	21.6	72.64	69.88	74.79	30.05	34.24	35.8	16.96	15.95	17.17	29.16	35.54	32.18	70.08	66.44	70.9	42.45	44.48	41.33	14.81	18.45	17.53	27.46	28.29	30.75	53.04	52.73	52.07	19.42	16	16.54	18.65	19.16	23.74	36.9	37.56	37.74	65.95	66.06	64.66	18.74	20.46	20.83	10.06
BnaA01G0088800ZS	0.23	0.21	0.35	0	0	0.15	0	0	0.04	0.09	0.16	0.23	0	0	0	0	0	0.03	0	0	0	0.04	0.07	0.38	0	0.26	0	0	0.04	0	0.08	0.08	0	0	0.05	0.13	0	0	0	0	0	0	0	0	0	0.04	0	0	0.17
BnaA01G0088900ZS	0.03	0	0	1.32	1.41	0.16	0	0.43	0.47	0.37	0.09	0	0	0	0.02	4.66	2.13	3.3	0.83	0	1.34	1.19	0.72	1.31	0.34	0	0.64	0.2	0	0	0.22	0.89	0.71	0	1.28	1	0	0.19	0.33	1.23	0.7	0.91	2.4	3.04	0	0.39	2.02	2.5	0.25
BnaA01G0089000ZS	0	0	0	0	0	0	0	0	0	0	0	0	0	0	0	0	0	0	0	0	0	0	0	0	0	0	0	0	0	0	0	0	0	0	0	0	0	0	0	0	0.05	2.58	0	0	0	0	0.31	0	0
BnaA01G0089100ZS	0.48	0.19	0.99	0.21	0.17	0	1.48	1.29	2.12	2.18	2.05	1.71	4.73	4.87	6.05	5.62	5.11	5.63	6	5.95	6.94	13.24	9.88	12.23	0	0	0	0.15	0	0	0	1.31	0.17	0.06	4.76	1.11	4.04	3.29	3.99	2.73	2.65	2.5	7.52	6.71	6.28	14.87	14.77	16.77	0.58
BnaA01G0089200ZS	0	0	0	0	0	0	0	0	0	0	0	0	0	0	0	0	0	0	0	0	0	0	0	0	0	0	0	0	0	0	0	0	0	0	0	0	0	0	0	0	0	0	0	0	0	0	0	0	0
BnaA01G0089300ZS	0.41	0.38	0.18	0.38	0.13	0.06	1.89	1.46	1.41	2.9	2.71	1.36	0.25	0.06	0	0.11	0.24	0.16	0.3	0.62	0.25	0.95	1.49	1.26	0	0.12	0.13	1.01	1.16	0.75	2.62	1.64	1.53	2.89	3.98	2.62	0.13	0.18	0.33	0.74	0.35	0.36	0.44	1.04	1.09	2.74	3.47	2.88	0.14
BnaA01G0089400ZS	0.84	1.23	0.99	0.36	0.87	0.5	0.16	0.2	0.16	0.2	0.05	0.16	1.45	1.75	1.62	0.71	0.64	0.77	0.17	0.13	0.23	0.3	0.15	0.36	0.4	0.64	0.5	0.25	0.17	0.28	0.05	0.05	0.06	0.04	0	0.12	1.61	1.45	1	0.37	0.44	0.54	0.24	0.25	0.16	0.02	0	0	0.9
BnaA01G0089500ZS	0	0	0	0	0	0	0	0	0	0	0	0	0	0.08	0.07	0	0	0	0.08	0.08	0	0	0	0	0	0	0	0	0	0	0	0	0	0	0	0	0	0	0	0	0	0	0	0	0	0	0	0	0
BnaA01G0089600ZS	0	0	0	0	0	0	0.2	0.2	0.39	0.27	0.41	1.1	0	0	0	0	0.2	0	0.74	0.3	0.6	0.26	0.36	1.33	0	0	0	0	0	0	0.11	0.1	0	1.26	0.34	0.65	0	0	0	0	0	0	0.3	0.3	0.47	0.77	0.56	0.83	0
BnaA01G0089700ZS	3.3	2.74	3.24	1.93	1.29	2.06	3.31	2.71	2.93	1.78	0.79	1.09	3.66	3.76	3.5	1.92	2.31	1.4	2.5	2.73	2.4	2.21	1.37	2.57	1.65	2.22	2.07	3.13	2.36	1.66	1.7	3.53	2.52	0.49	0.96	1.71	1.94	2.19	1.76	2.92	3.67	3.11	2.71	3.56	2.4	0.73	0.4	0.12	1.8
BnaA01G0089800ZS	0	0.03	0.04	0.36	0.15	0.03	0.04	0.04	0.11	0.07	0.12	0.06	0	0	0	0.22	0.29	0.29	0.03	0.12	0.19	0.06	0.2	0	0	0	0	0	0.21	0	0.12	0.35	0	0.04	0	0.12	0	0.07	0	0.26	0.04	0.24	0	0.11	0.09	0.08	0.13	0	0
BnaA01G0089900ZS	1.32	0.93	0.81	1.53	1.67	1.42	0.72	1.05	0.51	0.36	0.32	0.27	1.74	0.74	0.63	2.12	2.02	1.81	1.97	1.78	2.19	0.47	0.28	0.31	1.29	1.05	0.87	1.85	1.78	2.44	0.79	0.48	1.07	0.21	0.04	0.25	1.41	1.04	1.62	2.26	2.64	2.7	0.8	0.7	0.75	0.38	0.13	0.29	0.22
BnaA01G0090000ZS	0.14	0.49	0.59	0.1	0.93	0	0.24	0	1.37	0.06	0	0.21	4.53	3.99	3.14	7.84	4.99	6.86	7.97	5.98	8.15	1.69	0.63	0.65	0	0	0	0	0.06	0.19	0.62	0.12	0	0.1	0.11	0.45	4.52	5.34	4.68	10.58	14.32	13.67	9.16	7.82	10.8	7.59	5.42	6.12	3.86
BnaA01G0090100ZS	0.21	0.13	0.07	0.19	0.45	0.13	0.29	0.52	0.57	0.59	0.74	0.55	0.43	0.64	0.15	0.63	0.43	0.32	0.24	0.36	0.29	0.99	0.45	0.73	0.86	0.28	0.15	0.44	0.08	0.08	0.31	0.15	0.34	0.28	0.4	1.02	0.23	0	0.23	0.8	0.14	0.35	0.15	0.21	0.42	0.72	0.32	0.17	0.8
BnaA01G0090200ZS	0	0	0	0	0	0.04	0	0	0	0	0	0	0.36	0	0.08	0	0	0	0	0	0	0.02	0	0.06	0	0	0	0	0	0.13	0	0	0.14	0.04	0	0	0.04	0.04	0.04	0	0.04	0.04	0	0	0	0	0.27	0.05	0
BnaA01G0090300ZS	39.52	36.47	37.6	21.62	23.6	20.13	14.4	14.84	16.1	9.46	7.37	8.29	113.2	114.48	103.64	34.35	35.55	33.04	34.26	37.66	35.3	14.72	16.03	17.39	23.41	27.73	26.63	6.32	6.39	6.43	12.65	12.17	12.4	4.65	3.08	2.67	76.45	75.5	66.42	19.32	18.9	21.88	32.86	38.78	34.66	6.08	5.18	4.22	7.4
BnaA01G0090400ZS	0.26	0.24	0.17	0.11	0.05	0.04	0.18	0.05	0.11	0.32	0.24	0.17	0.61	0.51	0.68	0.03	0.06	0.12	0.17	0.19	0.09	1.09	0.91	0.92	0.53	0.72	0.97	0.32	0.28	0.3	0.07	0.13	0.29	0.78	0.82	0.83	1.84	2.12	1.78	0.19	0.34	0.26	0.34	0.38	0.43	1.28	1.2	1.07	0.3
BnaA01G0090500ZS	5.8	6.27	4.69	4.61	4.48	5.06	0.05	3.74	2.58	3.45	3.27	1.39	6.77	6.43	5.69	11.21	10.3	10.77	10.03	12.15	11.19	9.07	7.43	7.76	5.77	5.02	6.15	3.31	0.61	0.75	3.43	4.47	0.27	1.9	2.8	2.86	4.58	10.12	8.73	6.25	7.36	6.4	9.3	9.76	6.61	4.37	5.36	5.31	6.21
BnaA01G0090600ZS	4.04	4.78	2.82	2.13	2.54	1.5	2.07	1.11	2.31	1.72	1.98	0.6	7.64	6.68	5.98	2.93	4.02	2.65	2.65	2.72	2.57	2.11	1.91	1.75	3.52	5.64	2.13	0.74	2.61	2.19	1.91	1.69	2.34	1.15	0	1.36	6.75	6.7	6.37	3.89	5.06	5.21	3.52	3.24	3.78	2.2	1.34	2.56	2.81
BnaA01G0090700ZS	14.79	15.35	16.37	9.61	10.39	11.36	6.78	9.96	12	9.31	8.99	8.38	10.62	11.07	12.67	10.04	7.81	8.97	6.81	6.81	4.97	5.97	7.5	5.21	14.82	13.67	11.56	13.32	14.66	15.26	9.05	8.04	8.08	7.8	7.95	11.45	8.71	7.97	8.18	10.72	12.05	11.1	7.54	6.34	7.15	8.25	7.06	7.34	13.13
BnaA01G0090800ZS	2.06	2.64	2.71	5.56	4.72	4.23	1.49	3.01	1.62	3.35	2.64	2.85	3.98	3.04	3.31	3.99	3.85	4.47	2.27	3.01	2.92	1.62	1.47	2.16	2.82	2.96	4.22	2.64	2.55	3.02	1.46	1.77	1.63	2.52	2.87	3.56	3.8	3.86	2.28	2.51	2.2	1.6	2.09	1.36	2.03	2.48	2.03	2.42	4.19
BnaA01G0090900ZS	1.07	1.77	1.25	1.34	1.15	0.98	0.77	0.95	1.37	0.93	0.67	0.56	2.26	1.72	2.11	2.37	2.79	2.22	1.42	1.81	1.67	1.12	1.5	1.67	0.8	0.68	0.94	0.83	0.86	0.37	0.61	0.95	0.11	0.49	0.28	0.63	1.9	1.52	1.29	0.49	0.77	1.65	1.08	0.98	1.81	0.24	0.71	0.29	0.98
BnaA01G0091000ZS	3.61	3.49	3.55	2.54	1.96	2.17	1.41	2.06	1.98	3.84	3.1	2.72	3.5	5.8	4.84	3.48	3.66	3.26	2.03	1.97	2.81	3.61	3.6	4.52	2.97	2.28	2.66	1.32	0.85	2	1.44	1.37	1.37	4.29	4.45	4.47	3.45	4.52	2.52	1.42	0.47	1.71	1.97	1.94	1.79	4.15	4.53	3.57	3.88
BnaA01G0091100ZS	1.07	2.56	1.89	2.61	3.42	1.73	1.46	3.45	4	1.58	2.58	1.54	1.5	3.5	1.34	2.77	4.43	4.73	2.68	2.01	0.95	2.59	1.88	0	1.62	2.14	2.75	2.3	1.01	0	4.66	4.59	6.62	5.47	3.84	6	2.71	1.94	1.33	2.24	3.26	1.16	2.69	2.12	2.68	4.16	5.86	5.26	0
BnaA01G0091200ZS	2.46	2.36	3.21	2.26	2.8	2.67	1.58	1.73	1.69	4.01	3.67	2.98	0.79	0.71	0.65	0.42	0.5	0.42	0.52	0.52	0.42	2.63	2.84	2.82	2.03	2.05	2.6	3.25	2.24	3.26	1.28	1.75	1.49	2.55	3.04	3.48	0.54	0.26	0.44	0.53	0.5	0.31	0.16	0.26	0.4	2.5	2.43	2.57	2.21
BnaA01G0091300ZS	0	0	0	0	0	0	0	0	0	0	0	0	0	0	0	0	0	0	0	0	0	0	0	0	0	0	0	0	0	0	0	0	0	0	0	0	0	0	0	0	0	0	0	0	0	0	0	0	0
BnaA01G0091400ZS	0	0	0	0	0	0	0	0	0	0	0	0	0	0	0	0	0	0	0	0	0	0	0	0	0.18	0	0	0	0	0	0	0	0	0	0	0	0	0	0	0	0	0	0	0	0	0	0	0	0
BnaA01G0091500ZS	6.33	10.17	9.93	7.14	6.34	7.75	2.73	4.83	4.41	4.02	2.52	2.23	0.45	1.07	2.06	0.27	0.4	0.56	0.59	1.42	0.38	0.21	0.75	1.08	7.95	5.88	7.39	10.72	8.35	8.98	3	1.37	3.02	2.06	1.7	0.69	0.75	0.98	1.05	0.93	1.61	2.34	0.91	0.2	0.5	0.23	0.61	0	15.51
BnaA01G0091600ZS	0.04	0.07	0	0	0	0	0.12	0	0	0.07	0	0	0	0	0	0	0	0	0	0.04	0	0	0	0	0	0	0	0.16	0	0	0.04	0.08	0	0.44	0	0.07	0	0	0	0	0	0.12	0	0.04	0.09	0.31	0.81	0.8	0
BnaA01G0091700ZS	0	0	0	0	0	0	0	0	0	0	0	0	0	0.02	0	0	0	0.02	0	0	0	0	0	0	0	0	0	0	0	0	0	0	0	0	0	0	0	0	0	0	0	0	0	0	0	0	0	0	0
BnaA01G0091800ZS	0	0	0	0	0	0	0	0	0	0	0	0	0	0	0	0	0	0.05	0	0	0	0	0	0	0	0	0	0	0	0	0	0	0	0	0	0	0	0	0	0	0	0	0	0	0	0	0	0	0
BnaA01G0091900ZS	0	0	0.06	0	0	0	0.06	0	0	0.03	0.06	0	0.09	0.03	0	0.41	0.44	0.54	0.55	0.47	0.76	0.33	0.32	0.18	0	0	0	0.03	0	0	0	0.15	0	1.81	1.46	1.38	0	0	0	0.32	0.2	0.32	1.13	0.67	0.97	3.47	3.18	2.85	0
BnaA01G0092000ZS	1.07	1.88	0.66	1.65	1.4	1.75	0.61	0.99	1.32	1.33	0.77	0.91	1.13	1.37	1.25	1.32	0.9	1.29	1.68	2.08	1.06	1.51	1.31	1.05	1.08	0.69	0.74	1.6	0.94	1.05	1	1.16	1.15	1.08	1.06	1.08	0.84	0.91	0.44	0.69	1.03	0.32	0.58	0.83	0.74	0.52	0.33	0.74	0.61
BnaA01G0092100ZS	0	0	0	0	0.52	0	0	0	0	0	0	0	0	0	0	0	0	0	0.13	0	0	0	0	0	0	0	0	0	0.23	0.43	0	0	0	0	0	0	0	0	0.17	0	0	0	0.06	0	0	0	0	0	0
BnaA01G0092200ZS	0	0	0	0	0	0	0	0	0	0	0	0	0	0	0	0	0	0	0	0	0	0	0	0	0	0	0	0.02	0	0	0	0	0	0	0	0	0	0	0	0	0	0	0	0	0	0	0	0	0
BnaA01G0092300ZS	0	0.01	0.02	0	0	0	0	0	0	0	0	0	0	0.03	0.04	0	0	0	0	0	0	0	0	0	0	0	0	0	0	0	0	0.07	0.06	0	0.02	0	0	0.03	0	0	0	0	0	0	0	0	0	0	0.19
BnaA01G0092400ZS	0	0	0	0	0	0	0	0	0	0	0	0	0.2	0	0	0	0	0	0	0	0	0	0	0	0	0	0	0	0	0	0	0	0	0	0	0	0	0	0	0	0	0	0	0	0	0	0	0	0
BnaA01G0092500ZS	0.03	0	0.06	0	0	0	0.04	0.15	0	0	0	0	0	0	0	0	0.09	0.08	0	0	0.03	0.07	0.03	0	0	0	0	0.03	0.25	0.05	0.1	0.04	0.04	0.73	0.41	0.97	0	0.06	0	0.03	0	0.03	0.32	0.43	0.46	3.23	2.56	3.67	0
BnaA01G0092600ZS	3.43	3.21	3.1	0.24	0.27	0.36	0.09	0.04	0.04	0.32	0.06	0.11	1.13	1.39	1.24	0.16	0.08	0.28	0	0.02	0	0.09	0.09	0.16	5.33	5.96	6.07	0.06	0.06	0	0.91	0.76	0.92	0.46	0.46	0.48	2.38	1.52	2.31	0.04	0.02	0.04	0.08	0.04	0.33	1.38	0.85	1.13	2.32
BnaA01G0092700ZS	0	0.15	0	0	0	0	0	0	0	0	0	0	0	0.15	0	0	0	0	0	0	0	0	0	0	0	0	0	0	0	0	0	0	0	0	0	0	0	0	0	0	0	0	0	0	0	0	0	0	0
BnaA01G0092800ZS	0.95	0.45	1.1	0.96	1.22	0.79	0.65	0	0.96	0	0	0.17	0	0	0	0	0	0	0	0	0.01	0	0	0	0.63	0.66	0.07	1.61	0.75	0.85	0.46	0.01	0	0.04	0	0.08	0.53	0	0.18	0	0.88	0.45	0.03	0.62	0	0	0	0.34	0.35
BnaA01G0092900ZS	24.4	20.64	24.09	20.71	21.61	18.33	19.46	18.29	15.78	21.02	19.18	20.39	14.1	13.28	14.54	10.76	9.71	11.01	9.11	9.59	11.52	11.11	11.87	11.27	11.53	6.38	6.79	13.36	12.08	10.48	6.34	7.41	8.81	6.44	7.76	9.82	14.39	12.52	13.36	17.61	22.03	20.39	11.96	8.62	11.07	10.99	9.02	7.02	8.35
BnaA01G0093000ZS	0.63	1.09	0.7	0.75	0.84	0.99	0.44	0.51	0.55	0.57	0.56	0.25	1.03	0.66	1.41	0.26	0.95	0.82	0.75	0.53	0.48	0.1	0.55	0.35	0.28	0.27	0.46	0.21	0.38	0.23	0.22	0.48	0.4	0.09	0.35	0.19	0.45	0.59	1.04	0.18	0	0.68	0.39	0.37	0	0.57	0.39	0	1.13
BnaA01G0093100ZS	20.91	18.93	22.25	31.42	34.32	31.61	20.7	19.54	17.26	11.56	10.67	10.76	28.58	24.84	26.72	26.56	25.1	24.13	16.96	12.68	15.84	18.42	15.9	15.31	35.43	34.03	34.76	29.36	28.72	30.66	58.27	59.88	60.89	33.87	40.34	37.84	34.52	32.68	34.48	19.45	22.14	21.12	32.96	31.41	33.76	30.07	29.67	32.4	22.73
BnaA01G0093200ZS	3.15	3.47	3.33	3.24	3.4	3.81	1.66	1.76	1.09	2.92	2.96	3	1.88	2.48	1.85	2.4	2.3	1.97	1.11	1.35	1.32	1.53	1.38	1.7	1.5	2.12	1.89	1.86	2.1	2.17	1.2	1.1	1.46	3.66	3.68	4.4	0.48	0.51	0.46	1.17	2.3	1.69	1.32	1.22	1.24	3.43	2.94	2.42	3.82
BnaA01G0093300ZS	0	0	0	0	0	0	0	0	0	0	0	0	0	0	0	0	0	0	0	0	0	0	0	0	0	0	0	0	0	0	0	0	0	0	0	0	0	0	0	0	0	0	0	0	0	0	0	0	0
BnaA01G0093400ZS	0.65	1.78	0.56	0.88	0.7	0.21	0.92	0.35	0.22	0.2	0.81	0.19	0.23	0.1	0	0.1	0.22	0.4	0.37	0.56	0.11	0.29	0.3	0	0.45	0	0.23	0.35	0.59	0.63	0.48	0.12	0.67	0.11	0.38	0	0.73	0	0.48	0.81	1.07	0.55	0.47	0.56	0.4	0.25	0.13	0.68	0.38
BnaA01G0093500ZS	1.12	0.51	0.86	0	0	0	0	0	0	0	0.15	0	0.15	0.26	0	0	0	0	0	0	0	0	0	0	0	0	0	0	0	0	0	0	0	0	0	0	0	0.29	0	0	0	0	0	0	0	0	0	0	0.32
BnaA01G0093600ZS	0.27	0.37	0.41	0	0.15	0	0.43	1.16	0.42	0.53	0	0.12	0.14	0.13	0	0.37	0	0	0	0.14	0	1	1.05	1.34	1.39	0.54	0.43	0.29	0.59	0.16	3.12	4.7	4.3	2.29	5.1	6.95	1.21	0.16	1.19	0	0	0.28	2.37	1.2	1.82	2.85	1.78	1.26	0
BnaA01G0093700ZS	0	0	0	0	0	0	0	0.1	0	0	0	0	0	0	0	0	0	0	0	0	0.12	0	0	0	0	0	0	0	0	0	0	0	0	0	0	0	0	0	0	0	0	0	0	0	0	0	0	0	0
BnaA01G0093800ZS	0	0.06	0	0	0	0	0	0	0	0	0	0	0	0.12	0.05	0.25	0	0	0.18	0	0.43	0	0.03	0.11	0	0.05	0	0.05	0	0.16	0	0	0	0	0	0	0.21	0	0.04	0	0.08	0	0.43	0	0.39	0	0	0.28	0
BnaA01G0093900ZS	0	0	0	0.09	0.11	0.14	0.99	1.31	1.07	0.56	0.42	0.7	0	0	0	0.23	0.2	0.09	1.33	0.48	1.11	0.57	0.72	0.56	0.15	0	0	0.26	0	0.34	2.7	1.76	1.58	0.65	0.17	0.84	0	0.05	0	0.6	0.19	0.35	1.61	1.22	1.45	1.98	0.98	1.72	0
BnaA01G0094000ZS	7.72	7.78	7.29	0.05	0	0.1	0	0	0	0.05	0	0.09	3.1	3.2	3.76	0.09	0.05	0	0	0	0	0	0	0	2.26	2.22	1.23	0.11	0	0.06	0.11	0.05	0	0	0.06	0	1.13	1.61	2.47	0.05	0.05	0	0	0	0.06	0.12	0.06	0	4.26
BnaA01G0094100ZS	5.39	5.96	6.1	6.75	7.15	7.41	2.3	2.24	2.49	3.45	2.81	2.83	8.32	8.39	10.16	8.18	8.84	7.75	2.69	2.82	3.19	4.26	4.69	4.5	5.45	6.12	6.77	5.1	4.64	4.9	1.69	1.28	1.51	2.5	2.05	2.42	7.3	7.77	7.39	5.01	5.15	5.4	2.16	1.72	1.99	2	1.76	2.2	8.19
BnaA01G0094200ZS	0.05	0.55	0.08	0.73	0	0.86	0	0	0	0	0	0	0.12	0.23	0.33	0.21	0.13	0.15	0.39	0.15	0	0	0	0.2	0.54	0.35	0.23	0.2	0.05	0.1	0.03	0.06	0	0	0.2	0	0.27	0.5	0.67	0.18	0.2	0.12	0	0.08	0	0	0	0	0.21
BnaA01G0094300ZS	2.58	1.54	1.53	1.46	1.34	1.66	1.61	0.97	1.34	1.45	1.1	1	1.23	1.72	1.15	1.74	1.59	1.33	1.88	1.38	1.58	0.25	0.77	1.11	1.13	2.15	2.07	1.84	1.88	2.48	1.11	0.83	1.21	0.44	1.47	0.21	1.46	1.74	1.14	1.55	2.5	1.3	1.05	1.25	0.56	0.46	0.38	0.29	1.18
BnaA01G0094400ZS	4.13	4.27	4.36	4.06	3.8	4.01	3.27	2.93	3.35	2.61	2.4	2.79	4.02	3.79	3.84	4.2	3.14	2.85	2.39	2.72	2.19	3.13	2.95	3.13	4.31	4.21	3.98	4.09	3.27	3.27	2.58	2.73	2.51	1.59	1.87	1.82	3.59	4.22	3.44	3.25	2.85	3.48	2.21	2.15	2.21	1.53	1.41	0.99	3.38
BnaA01G0094500ZS	7.08	7.21	6.56	7.85	8.42	8.64	2.79	3.12	2.89	1.57	1.37	1.73	5.28	4.48	6.01	12.47	11.25	11.39	4.35	5.22	4.12	1.64	1.81	0.94	3.94	3.22	3.69	5.7	5.96	5.45	2.19	2.43	1.9	2.58	2.01	1.86	4.09	4.46	3.58	5.68	4.81	5.32	4.41	3.75	4.22	2	1.62	1.92	6.1
BnaA01G0094600ZS	0	0	0	0	0	0	0	0	0	0	0	0	0	0	0.16	0	0	0	0	0	0	0	0	0	0	0	0	0	0	0	0	0	0.24	0.4	0	0.25	0	0.08	0	0	0	0	0	0	0	0	0	0	0
BnaA01G0094700ZS	0	0	0	0	0	0	0	0	0	0	0	0	0	0	0	0	0	0	0	0	0	0	0	0	0	0	0	0	0	0	0	0	0	0	0	0	0	0	0	0	0	0	0	0	0	0	0	0	0
BnaA01G0094800ZS	0	0	0	0	0	0	0	0	0	0	0	0	0	0	0	0	0	0	0	0	0	0	0	0	0	0	0	0	0	0	0	0	0	0	0	0	0	0	0	0	0	0	0	0	0	0	0	0	0
BnaA01G0094900ZS	0.03	0.02	0.02	0.06	0	0.07	0	0	0.02	0	0.05	0.02	0.05	0.07	0	0	0	0	0	0	0	0	0	0	0.03	0	0.02	0.15	0.05	0	0	0.03	0	0	0	0	0	0	0	0	0	0	0	0	0	0	0	0	0
BnaA01G0095000ZS	0.02	0.08	0.01	0.04	0.01	0	0.01	0	0	0.02	0	0	0.14	0.1	0.18	0.09	0.09	0.16	0	0	0	0	0	0	0.04	0.02	0.05	0.07	0	0.03	0	0	0.01	0	0	0	0.02	0.15	0.21	0.08	0.08	0.01	0	0.01	0.02	0	0.04	0.01	0.05
BnaA01G0095100ZS	0	0	0	0	0	0	0	0	0	0	0	0	0	0	0	0	0	0	0	0	0	0	0	0	0	0	0	0	0	0	0	0	0	0	0	0	0	0	0	0	0	0	0	0	0	0	0	0	0
BnaA01G0095200ZS	0	0	0	0	0	0.22	0.12	0	0.24	0	0	0	0	0	0	0	0	0	0.1	0	0	0	0	0.1	0	0	0.12	0	0	0	0	0	0	0	0	0	0	0	0.13	0	0	0	0	0	0	0	0	0	0
BnaA01G0095300ZS	0	0.69	0.17	0.23	0.36	0	0.18	0.09	0.17	0.08	0.27	0.15	0.09	0.08	0.09	0.31	0.09	0.54	0	0.09	0	0	0.47	0.28	0.26	0.25	0.63	0.18	0	0.49	0.37	0.36	0.1	0.26	0.59	0.38	0.28	0.26	0	0.35	0.08	0.09	0.09	0	0	0	0.1	0.11	0.39
BnaA01G0095400ZS	9.95	9.68	10.48	8.66	9.16	6.86	11.68	12.68	11.82	11.32	11.53	11.14	8.51	8.61	8.69	8.87	8.69	10.62	10.4	10.32	10.45	12.45	11.1	13.62	10.86	11.45	12.02	9.06	9.57	9.39	12.55	13.05	13.31	6.85	5.37	4.92	10.3	12.65	10.1	9.03	9.09	9.02	8.39	9.63	8.27	8.3	8.52	8.76	5.49
BnaA01G0095500ZS	1.02	1.14	0.98	2.4	2.32	2.8	0.71	0.71	0.62	1.29	1.14	1	1.86	1.93	2.63	1.73	2.69	1.7	0.28	0.48	0.54	0.4	0.41	0.8	4.61	4.34	5.92	10.17	9.7	10.61	1.54	1.99	1.47	0.49	0.26	0.34	3.76	4.05	3.84	4.62	4.59	4.96	1.21	1.1	1.09	0.49	0.5	0.55	0.72
BnaA01G0095600ZS	0.88	0.78	1.05	2.33	2.65	2	3.82	3.32	3.51	1.28	1.05	1.61	1.06	1.16	1.21	2	1.89	2.69	1.68	2.13	1.22	0.4	0.3	0.16	2.41	2.05	2.03	1.5	1.52	1.73	3.28	2.94	2.65	1.14	1.46	1.01	2.45	3.31	2.21	1.46	1.63	1.57	1.37	2.32	1.75	2.97	2.72	2.92	0.32
BnaA01G0095700ZS	0.74	1.03	0.91	2.98	2.82	4.06	1.39	0.91	1.31	0.31	0.45	0	1.55	1.63	2.29	3.86	3.19	3.37	1.49	0.83	1.71	0.18	0.09	0.55	2.13	2.07	1.61	3.44	2.95	4.11	0.39	1.02	0.96	0.16	0.26	0.88	1.51	2.02	1.22	2.09	3.04	2.5	1.09	1.14	1.05	0.21	0.77	0.4	1.43
BnaA01G0095800ZS	0	0	0	0	0.21	0.45	0	0	0	0	0	0	0	0	0	0	0	0	0	0	0	0	0	0	0	0	0	0	0	0	0	0	0	0	0	0	0	0	0	0	0	0	0	0	0	0	0	0	0
BnaA01G0095900ZS	0.49	0.38	0.4	0.43	0.53	0.51	0.34	0.34	0.31	0.18	0.28	0.5	0.97	0.39	0.58	0.36	0.37	0.41	0.27	0.73	0.39	0.68	0.43	0.35	0.3	0.17	0.15	0.19	0.25	0.07	0.36	0.12	0.08	0	0.06	0	0.7	0.79	0.8	0.25	0.22	0.46	0.4	0.54	0	0.41	0.3	0.19	0.65
BnaA01G0096000ZS	0	0	0	0.42	0.07	0	0	0.07	0	0	0.07	0.23	0	0	0.07	0.12	0	0.06	0.44	0.34	0.27	0.06	0	0.16	0	0	0	0	0	0	0.07	0	0.16	0	0	0.07	0.14	0.33	0.07	0.52	0.44	0.33	0.16	0.07	0.39	0.59	0.45	0.56	0
BnaA01G0096100ZS	0.97	1.16	1.24	1.46	1.77	1.62	1.58	1.37	1.49	0.81	0.93	1.11	5.58	4.87	4.41	4.49	5.44	5.37	4.89	5.24	5.56	5.61	4.88	4.63	0.84	1.43	0.51	2.01	2.05	1.48	0.94	1.04	0.81	0.65	0.78	1.04	3.91	4.24	3.72	5.91	4.51	6	3.35	3.65	4.89	1.69	1.87	1.65	1.04
BnaA01G0096200ZS	0	0.35	0.4	0	0	0.15	0	0	0	0.21	0	0.17	0.89	0.12	0.22	0.29	0.49	0.56	0.14	0.78	0	0.16	0.41	0.47	0	0	0.41	0.08	0.07	0	0.07	0.07	0	0.36	0.19	0.3	0.43	0.41	0.31	1.68	0.93	0.63	0.54	0.77	0.51	1.39	1.08	1.8	0
BnaA01G0096300ZS	0	0	0	0	0	0	0	0	0	0	0	0	0	0	0	0	0.07	0	0	0	0	0	0	0	0	0	0	0	0	0	0	0	0	0	0	0	0	0	0	0	0	0	0	0	0	0	0	0.09	0
BnaA01G0096400ZS	0.33	0.12	0.2	0.36	0.29	0.51	0.14	0	0.14	0.87	0.35	0.35	0.49	0.06	0.44	0.3	0	0.06	0	0	0	0.41	0.56	1.03	0.75	1.19	1.06	1.41	1.15	1.07	0.59	0.42	0.33	0.4	1.31	0.15	0.37	0.55	0.29	1.01	0.29	0.95	0	0	0.24	1.38	0.7	0.25	0.46
BnaA01G0096500ZS	0.46	0.54	0.55	0.15	0.2	0.49	0.44	0.25	0.22	0.09	0.1	0.36	0.68	0.78	0.72	0.36	0.69	0.7	0.81	0.84	1.2	0.37	0.24	0.13	0.24	0.34	0.12	0.1	0.2	0.23	0.1	0.3	0.18	0.07	0.05	0.03	0.7	0.62	0.66	0.36	0.59	0.28	0.81	0.35	0.73	0.11	0.24	0.14	0.62
BnaA01G0096600ZS	0.11	0.12	0.04	0.14	0.05	0.32	0.5	0.31	0.31	0.92	0.54	0.71	0.3	0.27	0.41	0.16	0.34	0.34	0.55	0.41	0.68	1.03	0.98	1.26	0.22	0.22	0.21	0.39	0.41	0.37	0.66	0.57	0.59	0.52	0.25	0.25	0.43	0.34	0.23	0.44	0.51	0.36	0.58	0.68	0.6	0.53	0.46	0.69	0.29
BnaA01G0096700ZS	0.05	0.11	0	0.72	0.69	0.58	7.54	8.89	7.63	2.13	2.63	2.84	0	0.09	0	2.62	2.79	3.13	6.11	5.32	6.61	2.26	2	4.64	0	0	0	1.03	2.39	2.02	10.11	8.36	8.46	5.54	6.13	6.12	0.06	0	0.37	5.09	5.04	4.11	9.38	9.61	8.67	6.69	5.69	5.52	0
BnaA01G0096800ZS	0	0	0	0	0	0	0	0	0	0	0	0	0	0	0	0.04	0	0	0	0	0	0	0	0	0	0	0	0	0	0.15	0.55	0.3	0.35	1.48	1.76	1.48	0	0	0	0	0	0	0	0	0	0	0	0	0
BnaA01G0096900ZS	1.02	0	1.46	2.47	0.06	1.2	2.45	0.13	2.34	0	0	1.75	20.12	18.71	20.91	10.97	9.08	10.15	10.88	9.86	10.69	9.26	8.62	9.05	0	0	0	0.95	0	0.8	1.02	1.25	0	0.59	0.65	0	13.56	12.03	12.57	16.52	19.39	16.54	9.96	9.89	9.9	3.85	2.13	2.75	12.98
BnaA01G0097000ZS	0	0	0	0	0	0	0	0	0	0	0	0	0	0	0	0	0	0	0	0	0	0	0	0	0	0	0	0	0	0	0	0	0	0	0	0	0	0	0	0	0	0	0	0	0	0	0	0	0
BnaA01G0097100ZS	9.66	8.14	10.35	23.7	26.35	26.24	16.29	17.15	14.2	11.24	11.72	12.3	26.15	26.32	26.98	29.33	29.13	25.69	24	23.37	22.25	31.39	30.99	29.48	35.02	30.86	31.19	59.67	61.34	59.99	33.34	32.72	33.29	72.91	81.12	74.66	41.19	39.23	47.35	59.55	71.66	61.77	48.45	44.17	44.7	56.81	53.18	54.09	8.75
BnaA01G0097200ZS	0	0	0.25	0.64	0.07	0.06	0.6	0.13	0.49	0	0.19	0.06	0.26	0.12	0.77	0.29	0.97	0.85	0.32	0.25	0.63	0.17	0.54	1.21	0.07	0.32	0.13	0.48	0.62	0.44	0.42	0.33	0.23	0.45	0.22	0.07	0.5	0.13	0.07	0.78	0.74	1.17	0.26	0.98	0.46	0.43	0.36	0.48	0
BnaA01G0097300ZS	24.09	22.76	18.56	19.82	26.57	25.16	12	15.15	14.73	23.49	24.76	22.65	30.26	40.69	37.22	29.26	29.44	28.9	25.28	25	22.59	30.97	40.52	29.12	25.63	21.66	23.01	22.42	21.58	25.5	12.45	11.29	11.97	27.22	25.96	23.21	35.31	42.08	28.27	35.47	33.49	38.38	17.54	16.57	19.73	15.75	21.67	20.71	31.45
BnaA01G0097400ZS	0	0	0	0	0	0	0	0	0	0	0	0	0.36	0.05	0.16	0	0.25	0.22	0.25	0.05	0.1	0.09	0.18	0.24	0	0	0	0	0	0	0	0	0	0	0	0	0	0.1	0.16	0.05	0	0	0	0.1	0	0	0.17	0	0.06
BnaA01G0097500ZS	0.08	0.11	0.24	0.63	0.54	0.5	0.09	0.15	0.15	0.25	0.24	0.4	0.47	0.52	0.42	0.77	0.82	0.72	0.29	0.24	0.27	0.52	0.35	0.54	0.16	0.16	0.21	0.19	0.28	0.2	0.09	0.14	0.19	0.43	0.27	0.39	0.32	0.22	0.41	0.39	0.51	0.34	0.26	0.15	0.23	0.72	0.45	0.53	0.52
BnaA01G0097600ZS	10.27	7.4	7.71	9.03	10.73	8.9	1.93	1.2	2.13	0.76	0.72	0.94	19.6	20.11	21.47	18.26	19.58	17.42	5.74	5.29	5.44	1.45	1.99	1.94	7.71	8.42	7.58	4.98	6.16	4.88	1.57	1.02	1.28	0.65	0.86	1.11	12.49	10.49	11.42	11.89	11.76	10.54	3.66	2.93	3.29	1.17	1.39	1.66	7.87
BnaA01G0097700ZS	0	0.05	0	0.07	0	0	0	0	0	0	0	0	0.05	0	0	0	0.03	0	0	0	0	0	0	0	0	0	0	0	0	0	0	0	0	0	0	0	0	0	0	0	0	0	0	0	0	0	0	0	0.15
BnaA01G0097800ZS	0.11	0.05	0.04	0.03	0.2	0.03	0	0	0.06	0	0	0	0.06	0.17	0.18	0.02	0.08	0.05	0	0	0	0	0	0	0.06	0	0.14	0.06	0	0	0	0	0	0	0	0	0.06	0.06	0.21	0	0.05	0	0	0	0	0	0	0	0.03
BnaA01G0097900ZS	0	0.03	0	0	0	0	0	0	0	0	0	0	0	0	0	0	0	0	0	0	0	0	0	0	0	0	0	0	0	0	0	0	0	0	0	0	0	0.03	0	0	0	0	0	0	0	0	0.03	0	0
BnaA01G0098000ZS	15.33	13.33	12.7	8.81	9.43	7.9	3.88	5.64	3.67	3.19	3.13	2.82	15.31	14.06	15.11	8.17	7.83	6.89	3.71	3.59	3.37	4.47	3.99	5.94	14.12	13.37	11.65	8.21	9.02	9.58	2.73	3.96	3.37	3.08	2.68	2.75	12.2	12.45	10.78	7.86	6.2	7.26	3.04	3.29	2.91	3.28	3.68	3.4	14.66
BnaA01G0098100ZS	0.7	0.72	0.87	0.11	0	0	0	0	0	0	0	0.03	1.28	0.97	1.13	0.11	0.06	0	0	0	0	0	0	0	0.06	0.17	0.22	0.03	0	0	0	0.03	0	0	0	0	1.22	1.06	1.57	0	0	0.03	0	0.06	0.04	0	0	0	0.61
BnaA01G0098200ZS	0.13	0.08	0.23	0.29	0.05	0.22	0.05	0.05	0.09	0	0.24	0.04	0	0	0.2	0.04	0.14	0.04	0	0	0	0.04	0.04	0.04	0	0	0.1	0	0	0	0.2	0.29	0.11	0.09	0.16	0.05	0	0.05	0	0	0	0.05	0.28	0.42	0.22	0.05	0.26	0.22	0.52
BnaA01G0098300ZS	2.6	2.39	1.85	11.17	7.94	9.63	3.68	3.54	3.43	1.49	1.36	1.41	2.87	2.58	3.41	16.3	15.88	15.78	9.52	9.48	10.17	3.03	2.89	3.87	3.55	3.68	3.81	2.02	1.58	1.58	3.43	3.51	3.7	2.57	3.18	3.59	3.04	2.64	2.25	1.74	1.92	1.91	7.92	9.15	7.33	8	7.91	7.87	1.25
BnaA01G0098400ZS	0.71	0.81	0	2.68	0.66	2.86	2.33	0.83	0.98	1.59	2.19	2.43	1.34	0.94	1.06	5.14	4.92	4.5	3.9	3.59	4.33	5.27	4.19	4.56	0.52	0.81	0	1.06	0.99	0.58	0.49	1.98	2.03	2.27	1.38	1.97	0.71	0.86	1.08	1.96	2.57	2.83	3.59	3.98	2.91	6.58	5.83	5.99	1.51
BnaA01G0098500ZS	0.73	0.53	0.96	0.33	0.48	0.69	0.83	0.7	0.75	1.04	0.99	1.19	0.59	0.82	2.03	1.43	0.81	1.13	1.24	0.85	1.57	3.22	2.11	3.09	0.45	0.21	0.42	0.74	0.05	0.86	0.63	0.48	0.58	0.77	0.06	0.64	0.99	0.27	0.67	0.84	0.9	1.27	0.9	1.18	1.24	1.61	1.97	1.35	0.76
BnaA01G0098600ZS	0	0	0	0	0	0	0	0	0	0	0	0	0	0	0	0	0	0.03	0	0	0	0	0	0	0	0	0	0	0	0	0	0	0	0	0	0	0	0	0	0	0	0.07	0	0	0	0	0	0	0
BnaA01G0098700ZS	0	0	0	0	0	0	0	0	0	0	0	0	0	0	0	0	0	0	0	0	0	0	0	0	0	0	0	0	0	0	0	0	0	0	0	0	0	0	0	0	0	0	0	0	0	0	0	0	0
BnaA01G0098800ZS	0	0	0	0	0	0	0	0	0	0	0	0	0	0	0	0	0	0	0	0	0	0	0	0	0	0	0	0	0	0	0	0.05	0	0	0	0	0	0.04	0	0	0	0	0	0	0	0	0	0	0
BnaA01G0098900ZS	0.09	0.08	0.04	0.04	0	0	0	0	0.02	0	0	0.02	0.18	0.04	0.02	0	0.02	0.04	0	0	0.02	0.06	0.1	0.09	0.02	0	0	0	0.09	0	0.07	0	0.05	0.18	0.17	0.1	0	0.09	0.07	0	0	0.04	0.02	0	0	0.25	0.13	0.03	0.17
BnaA01G0099000ZS	0.03	0.26	0.45	1.98	1.88	1.36	0.87	0.2	0.52	0.33	0.23	0.14	3.33	2.09	3.63	2.48	2.61	5.07	1.61	0.98	1.87	0.13	0.49	0.88	0.09	0.08	0.41	2.04	2.9	1.34	0.05	0.58	0.72	0.42	0.33	0	2.21	5.6	2.32	1.66	3.3	1.32	1.2	1.61	0.64	1.03	0.58	0.21	0
BnaA01G0099100ZS	5.03	4.94	4.72	5.51	5	4.36	5.69	4.2	4.87	9.38	10.13	9.97	6.51	5.13	5.18	5.5	4.76	4.93	3.66	4.18	4.29	6.96	6.99	7.7	5.07	4.82	4.68	2.35	2.48	2.68	5.91	5.36	5.19	14.78	15.64	16.06	5.07	5.08	4.6	2.84	2.48	2.75	2.46	2.9	3.26	10.62	11.29	12.1	4.14
BnaA01G0099200ZS	1.91	2.12	2.47	0.5	0.68	0.65	2.41	1.83	2.53	1.3	1.58	1.79	1.36	1.35	0.99	0.14	0.27	0.1	1.02	0.91	0.87	1.88	1.37	3.06	0.58	0.48	1.27	0.47	0.68	0.4	7.35	6.58	6.39	9.62	7.35	8.77	0.25	1.12	0.82	0.29	0.04	0.11	0.67	1.11	1.41	4.64	5.71	5.76	2.84
BnaA01G0099300ZS	28.17	24.78	25.66	15.58	17.35	17.34	28.22	27.17	28.35	46.68	47.79	45.77	25.88	24.91	28.86	18.95	19.3	17.74	23.91	23.08	22.29	49.29	47.83	45.29	23.12	21.57	19.71	25.3	23.75	22.85	28.66	28.83	27.91	38.93	39.24	36.29	22.81	22.4	25.54	20.82	26.18	24.09	20.54	20.31	20.93	31.43	32.44	33.46	28.46
BnaA01G0099400ZS	3.05	2.25	2.98	2.33	1.81	0.25	2.74	2.74	3.43	1.37	1.39	0.96	3.93	4.68	3.34	0.07	2.49	1.54	1.73	0.99	0.95	1.45	2.34	0.74	4.38	2.83	2.45	5.05	2.3	2.82	5.27	2.44	4.77	1.19	0.56	2.78	18.55	17.21	17.56	10.21	10.26	10.05	7.64	6.63	5.68	5.06	6.8	4.42	1.38
BnaA01G0099500ZS	0.31	0.52	0.13	0.37	0	0.95	0.17	0.7	0.32	0.4	1.22	0.26	1.75	1.48	0.45	2.06	2.06	1.64	2.23	1.95	2.07	1.08	1.47	2.94	0.87	0.71	0.77	1.25	0.95	1.04	1.39	0.66	2.44	0.19	0.51	0.81	2.51	2.43	1.49	2.69	2.51	3.42	2.66	4.86	4.43	2.15	1.07	1.61	0.38
BnaA01G0099600ZS	0.35	0.32	0.44	0.42	0.17	0.45	0.54	0.38	0.24	0.22	0.17	0.28	0.2	0.07	0.3	0.72	0.16	0.32	0.13	0.04	0.28	0.45	0.25	0.41	0.32	0.43	0.29	0.21	0.34	0.32	0.34	0.92	0.29	0.12	0.05	0.35	0.31	0.28	0.56	0.41	0.19	0.12	0.12	0.28	0.19	0.14	0.09	0.29	0.5
BnaA01G0099700ZS	0	0	0	0	0	0	0	0	0	0	0	0	0	0	0	0	0	0	0	0	0	0	0	0	0.1	0.09	0.3	0	0	0	0.52	0	0	0	0	0	0	0	0	0	0	0	0	0	0.12	0	0	0	0
BnaA01G0099800ZS	0	0	0	0.06	0	0	0	0.04	0	0.03	0.07	0.12	0.03	0	0.03	0.06	0	0	0	0	0	0	0.09	0.15	0.06	0	0	0.05	0	0	0.03	0.34	0.04	0.06	0.18	0	0.07	0	0.1	0.04	0.06	0.24	0.04	0.06	0	0.04	0.11	0.04	0
BnaA01G0099900ZS	0.02	0.48	0.86	0.29	0.25	0	0.25	0.25	0.06	0.28	0	0	1.45	1.44	1.31	1.06	1.53	2.33	1.18	0.88	1.18	0.43	0.37	0.94	0.43	0	0	0.29	0.32	0	0.04	0.08	0.49	0.45	0.82	0.93	1.57	1.57	1.17	0.11	0	1.14	0.63	0.39	0.7	2.16	2.05	2.25	0
BnaA01G0100000ZS	2.23	1.58	0.88	2.36	1.44	1.75	4.18	3.42	3.76	6.19	6.49	6.79	2.34	2.54	1.92	2.61	1.47	1.6	2.21	2.27	2.99	11.31	9.14	9.59	3.27	2.7	2.98	6.4	6.47	5.66	5.6	6.76	6.09	12.56	13.75	13.1	2.88	3.37	3.62	4.75	5.19	5.6	2.71	2.56	2.54	8.3	7.99	7.16	1.45
BnaA01G0100100ZS	2.2	1.24	1.63	3.97	2.91	4.51	3.71	4.65	3.64	0.8	2.19	0.79	3.83	3.2	3.81	3.34	4.23	3.4	3.59	3.76	3.17	2.81	1.58	1.59	2.56	3.08	2.83	4.05	4.83	4.47	4.41	4.78	3.56	1.59	1.18	1.12	2.6	3.06	3.08	4.75	1.12	1.91	3.53	1.79	2.62	2.24	1.09	1.36	1.5
BnaA01G0100200ZS	7.19	6.33	7.39	3.85	3.66	2.8	3.54	2.86	3.42	3.17	3	2.78	7.37	7.66	5.44	4.44	2.74	3.48	2.58	1.48	2.13	3.41	2.29	2.81	6.04	5.01	6.22	3.35	2.85	3.48	2.41	2.39	2.82	3.12	2.87	1.96	4.43	5.78	5.56	3.36	3.54	2.56	1.99	2.32	3.43	2.34	2.93	2.9	7.13
BnaA01G0100300ZS	0	0.01	0.04	0	0	0	0.02	0.09	0.06	0.06	0.04	0.02	0.02	0.04	0.02	0.01	0	0	0.14	0.15	0.16	0	0.01	0	0	0.01	0	0	0	0	0.04	0	0	0.03	0	0.03	0	0	0.01	0	0	0.01	0.02	0.1	0.06	0.01	0	0	0.05
BnaA01G0100400ZS	0	0	0	0	0	0	0.03	0	0.09	0	0.06	0.05	0	0	0	0	0	0	0.13	0	0	0	0	0	0	0	0	0	0	0	0.06	0	0.04	0	0	0	0	0	0	0	0	0	0.03	0	0	0.07	0	0.03	0
BnaA01G0100500ZS	13.7	14.76	14.43	7.21	6.72	6.84	7.06	6.91	7.03	3.48	2.9	3.45	15.53	17.15	16.25	7.99	8.8	8.39	6.36	6.61	6.44	5.6	5.65	4.49	28.73	29.01	29.52	15.08	13.99	13.24	11.38	10.61	9.03	8.25	7.27	7.19	25.1	24.49	24.85	17.83	15.83	17.2	9.17	10.67	9.83	22.89	21.12	21.32	22.36
BnaA01G0100600ZS	0	0	0.13	0	0	0	0	0	0	0.17	0	0	0	0	0	0	0	0	0	0	0	0	0	0	0	0	0	0.25	0	0	0	0	0	0	0	0	0	0	0	0	0	0.41	0	0	0.14	0	0	0	0
BnaA01G0100700ZS	0.22	0.56	0.54	0.28	0.38	0.3	0.33	0.28	0.14	0.08	0.47	0.33	1.7	0.66	1.42	1.29	1.21	0.73	0.45	0.5	0.87	0.79	0.57	0.9	0.41	0.39	0.42	0.19	0.53	0.66	0.34	0.19	0.33	0.15	0.15	0.35	0.99	0.73	0.87	1.24	1.08	0.9	0.19	0.32	0.16	0.81	0.93	0.27	0.42
BnaA01G0100800ZS	6.3	5.48	5	8.63	7.69	8.86	4.01	4.81	4.69	3.35	3.7	3.89	5.97	5.29	6.48	7.92	9.82	11.39	6.31	7	4.53	4.33	4.89	5.31	6.15	6.33	5.36	9.1	9.7	10.59	4.84	4.47	4.52	1.57	1.84	1.3	7.11	9.04	7.04	11.18	8.95	10.62	6.1	4.57	4.74	10.28	9.83	9.65	6.37
BnaA01G0100900ZS	0.55	0.75	1.04	10.45	11.24	11.09	22.99	21.07	20.87	12.24	11.09	12.04	2.83	2.43	2.6	15.53	15.61	16.41	24.99	24.31	26.74	27.3	27.96	27.46	1.67	1.17	1.52	6.73	6.37	5.56	34.19	33.79	35.56	39.69	40.44	39.92	3.09	3.52	3.11	12.87	14.05	11.81	34.29	32.11	33.06	53.83	49.29	51.31	0.82
BnaA01G0101000ZS	4.29	3.74	4.05	2.73	2.26	2.82	2.36	2.68	2.48	2.46	2.26	1.77	2.67	3.32	3.2	2.56	2.47	1.83	1.47	2.44	1.94	2.64	1.82	1.66	2.7	2.77	3.44	3.61	3.37	3.5	2.09	2.39	2.06	2.21	2.03	1.98	1.61	2.69	2.31	3.54	4.23	3.36	1.17	1.75	0.35	2	2.33	2.1	3.07
BnaA01G0101100ZS	9.88	12.26	13.04	6.56	7.5	7.82	5.55	4.53	5.32	3.82	5.75	4.08	4.36	5.33	4.43	2.18	3.15	3.41	2.15	2.14	1.83	1.96	1.76	1.85	8.87	10.73	9.37	7.58	8.06	7.43	3.08	3.71	3.54	2.48	1.92	1.39	7.59	5.68	6.09	4.23	4.32	4.43	2.6	1.88	2.28	1.93	1.93	2.15	11.11
BnaA01G0101200ZS	1.23	2.09	1.43	1.35	1.38	1.07	1.1	1.14	1.27	1.09	0.88	1.08	0.23	0.19	0.15	0.11	0.08	0.16	0.16	0.13	0.14	0.17	0.21	0.09	1.17	1.5	1.72	1.26	1.52	1.28	1.44	0.7	1.1	1.94	1.68	2.14	0.44	0.26	0.46	0.69	0.63	0.13	0.08	0.2	0.24	0.18	0.15	0.23	1.38
BnaA01G0101300ZS	6.59	3.72	4.49	3.04	3	2.89	2.92	2.22	3.2	2.23	1.7	1.79	5.37	6.99	7.66	3.16	2.41	1.8	2.08	2.21	2.37	3.13	2.5	1.69	23.79	23.31	25.46	18.51	17.72	21.27	10.98	10.72	10.62	10.19	8.57	7.2	26.58	32.38	23.21	32.06	28.99	36.18	15.17	16.26	17.95	15.2	13.94	12.69	3.43
BnaA01G0101400ZS	0.56	0.9	0.71	0.02	0.13	0.02	0	0	0	0	0.05	0.02	0.21	0.37	0.16	0.02	0	0.09	0	0	0	0	0	0.04	0.25	0.47	0.47	0.05	0	0	0	0	0	0	0	0	0.11	0.15	0.05	0	0	0	0	0.05	0	0	0	0	0.46
BnaA01G0101500ZS	0.71	1.44	1.5	0.1	0.08	0.04	0	0	0	0	0	0	0.55	0.56	0.88	0	0.19	0	0	0	0	0	0	0	0.39	0.49	0.36	0	0.2	0	0	0	0	0	0	0	1	0.78	1.03	0	0	0.1	0	0	0	0	0	0	0.78
BnaA01G0101600ZS	37.44	37.52	36.83	35.23	35.95	34.73	28.48	26.87	26.75	42.75	40.18	41.04	30.38	26.9	28.7	23.96	23.6	23.37	18.84	18.81	19.71	23.1	24.66	24.84	34.16	33.6	35.31	29.56	27.25	26.53	24.36	25.2	22.39	50.05	46.21	44.45	24.62	25.67	24.73	19.91	21.74	23.25	16.41	16.93	15.64	29.8	32.04	30.18	28.2
BnaA01G0101700ZS	0.47	0.6	0	1.75	1.49	0.89	2.53	1.8	1.4	3.24	3.11	3.96	2.72	1.37	2.04	1.39	1.25	1.11	0.04	0.49	0.43	0.93	0.79	1.98	1.81	1.89	1.74	1.38	1.61	1.85	2.3	2.85	1.32	3.41	3.98	3.83	0.5	1.77	1.15	1.68	1.9	2.22	1.43	1.92	1.46	2.21	1.31	1.16	0.33
BnaA01G0101800ZS	1.19	1.57	1.66	1.26	0.78	0.65	0.72	0.96	1.01	1.46	1.39	0.22	3.64	3.35	2.04	2.26	4.26	2.6	2.87	1.44	1.97	1.52	3.08	3.16	0	0	0.75	0.96	1.4	1.41	0.56	0.28	0.24	0.64	0.24	0.32	3.82	3.23	1.74	3.16	3.39	3.51	1.12	1.65	2.27	0.64	1.17	0.83	0
BnaA01G0101900ZS	0	0	0	0	0	0	0	0	0	0	0	0	0	0	0	0	0	0	0	0	0	0	0	0	0	0	0	0	0	0	0	0	0	0	0	0	0	0	0	0	0	0	0	0	0	0	0	0	0
BnaA01G0102000ZS	0	0	0	0	0	0.05	0.07	0	0.16	0	0	0	0.05	0	0.23	0.05	0	0	0.18	0	0.05	0	0	0	0.05	0	0.11	0.11	0.06	0	0	0.06	0	0	0	0	0	0.11	0	0	0.05	0.05	0	0	0	0	0	0.06	0
BnaA01G0102100ZS	0	0	0	0	0	0	0	0	0	0	0	0	0	0	0	0	0	0	0	0	0	0	0	0	0	0	0	0	0	0	0	0	0	0	0	0	0	0	0	0	0	0	0	0	0	0	0	0	0
BnaA01G0102200ZS	0.08	0.12	0.03	0	0	0	0	0	0	0	0	0	0.24	0.13	0	0	0	0	0	0	0	0	0	0	0.06	0	0	0	0	0	0	0	0	0	0	0	0.09	0.14	0.03	0	0	0	0	0	0	0	0	0	0.13
BnaA01G0102300ZS	0	0.04	0.2	0	0.1	0.14	0.05	0	0	0	0	0	0	0.05	0.05	0.31	0	0.18	0.08	0.15	0	0	0	0	0.15	0.24	0.31	0	0	0	0	0	0	0	0	0	0.16	0.05	0.05	0	0	0	0	0	0	0	0	0	0.17
BnaA01G0102400ZS	0	0	0	0	0	0	0	0	0	0	0	0	0	0	0	0	0	0	0	0	0	0	0	0	0	0	0	0	0	0	0	0	0	0	0	0	0	0	0	0	0	0	0	0	0	0	0	0	0
BnaA01G0102500ZS	0.1	0.18	0.39	0	0	0	0	0	0	0	0	0	0.13	0.03	0.09	0	0	0	0	0	0	0	0	0	0	0.03	0.2	0	0	0	0	0	0	0	0	0	0	0.03	0.03	0	0	0	0	0	0	0	0	0	0.13
BnaA01G0102600ZS	0	0	0	0	0	0	0	0	0	0	0	0	0	0	0	0	0	0	0	0	0	0	0	0	0	0	0	0	0	0	0	0	0	0	0	0	0	0	0	0	0	0	0	0	0	0	0	0	0
BnaA01G0102700ZS	0	0.05	0.05	0	0	0	0	0	0	0.05	0	0	0.05	0.02	0.09	0	0	0	0.09	0	0	0.05	0	0	0.03	0	0.11	0.03	0	0	0.03	0	0	0.05	0	0	0	0	0	0	0	0	0	0	0.03	0	0	0	0
BnaA01G0102800ZS	16.77	18.25	16.39	2.26	2.08	2.35	1.22	1.62	1.86	0.23	0.22	0.32	17.73	20.2	19.26	2.44	2.63	2.41	1.92	2.27	2	0.13	0.2	0.1	22.52	21.67	23.29	2.14	1.87	1.67	1.24	1.16	1.16	0.44	0.26	0.17	14.21	14.71	14.3	1.63	1.64	1.6	1.91	1.91	2.21	0.77	0.53	0.4	26.31
BnaA01G0102900ZS	6.35	7.03	4.85	2.32	3.45	4	17.35	15.04	18.04	10.21	11.23	11.43	3.85	5.05	4.18	4.54	5.35	4.93	13.16	15.19	12.79	18.1	17.38	19.81	9.05	9.69	8.39	6.81	9.15	7.56	20.23	20.91	22.14	19.48	19.62	18.04	6.07	6.46	6.95	8.01	10.34	10.5	20.76	18.27	18.1	22.28	25.06	23.05	5.88
BnaA01G0103000ZS	1.64	1.22	1.38	0.92	0.94	1.73	0.79	0.65	0.54	0.64	0.56	0.49	1.54	1.31	2.25	1.77	1.86	1.57	0.71	1.79	1.01	1.17	1.31	1.22	0.46	0.45	1.27	0.64	0.65	0.95	0.5	0.48	0.28	0.46	0.26	0.57	0.73	0.93	0.66	1.86	1.4	0.95	1.1	2.08	0.54	1.39	0.61	0.56	0.69
BnaA01G0103100ZS	0	0	0	0	0.11	0	0	0	0	0.08	0.29	0.08	0	0	0	0	0.09	0	0.16	0	0.09	0	0	0	0	0.34	0	0.19	0.31	0	0	0.39	0.23	0.39	0.52	0.11	0	0	0	0	0	0	0	0.34	0.57	0	0	0.59	0
BnaA01G0103200ZS	6.21	4.76	5.43	1.61	0.35	1.76	2.83	1.99	1.99	1.37	0.53	0.73	7.04	5.14	5.02	4.99	4.36	2.37	2.72	1.57	2.52	2.32	1.66	0.73	23.34	18.25	18.7	4.32	7.51	6.81	4.01	4.2	4.27	0.75	0	0	11.17	8.9	13.2	5.08	3.34	0.9	3.83	3.53	2.71	1.14	2.64	3.31	4.02
BnaA01G0103300ZS	0	0.05	0.17	0	0	0	0	0	0	0	0	0	0	0	0	0	0	0	0	0	0.06	0	0	0	0	0	0	0	0	0	0	0	0	0	0	0	0	0	0	0	0	0	0	0	0	0	0	0	0
BnaA01G0103400ZS	0.75	1.12	1.05	13.27	14.24	14.66	6.14	6.55	6.41	2.96	3.45	3.85	1.33	1.36	1.53	6.26	7.07	6.96	2.42	2.51	2.84	0.56	0.65	0.62	3.81	3.81	4.22	4.38	5.92	4.76	5.18	6.23	5.35	7.91	8.1	7.92	2.68	2.78	2.82	3.3	3.36	2.88	3.44	2.95	2.9	3.19	3.83	3	0.98
BnaA01G0103500ZS	0.66	0.62	0.63	57.47	58.4	59.56	9.92	12.04	9.85	2.95	4.11	3.78	1.79	2.49	2.96	24.22	21.73	21.88	4.72	2.73	2.36	0.67	1.38	1.08	8.41	9.17	9.25	30.34	31.46	30.43	5.61	6.19	5.35	1.4	1.69	2.18	15.34	13.38	15.99	12.29	12.6	10.83	5.21	1.76	4.18	1.54	1.83	0.96	0
BnaA01G0103600ZS	15.84	17.98	15.27	12.97	11.66	12.63	9.61	10.62	9.97	9.27	9.38	8.61	19.11	18.5	18.58	13.43	13.85	13.71	10.17	10.55	11.09	11.51	12.88	12.28	14.28	13.86	14.04	14.05	15.5	14.93	7.53	8.72	7.13	7.08	6.62	7.02	13.88	14.04	13.16	13.79	13.73	14.71	9.03	9.59	8.93	7.58	7.06	7.48	15.89
BnaA01G0103700ZS	2.01	1.22	1.96	1.75	2.9	2.25	3.23	4.77	3.4	3.13	2.25	3.88	0.51	0.83	0.17	1.47	1.79	1.38	1.1	2.64	0.87	0.64	1.54	1.41	2.8	0.92	1.09	4.72	5.38	5.42	2.93	2.32	2.75	3.33	2.38	4.49	1.2	0.67	0.92	2	1.94	3.06	1.18	0.62	1.07	1.98	1.63	1.66	2.63
BnaA01G0103800ZS	1.74	1.51	1.22	2.36	2.06	1.78	1.52	0.68	0.76	0	0.07	0	1.08	0.71	1.19	0.86	0.52	0.14	0.38	0.01	0	0.03	0.08	0	1.95	1.23	1.89	1.44	2.36	1.36	0.34	0.73	1.1	0.09	0	0.21	0.66	0.3	0.28	0.12	0.3	0.26	0	0.13	0	0	0	0	2.44
BnaA01G0103900ZS	0.09	0.05	0.04	0.15	0.06	0.13	0.06	0.02	0.02	0.02	0.02	0.07	0.04	0.07	0	0.05	0.15	0.12	0.03	0.02	0.04	0.05	0.02	0.08	0	0.09	0.16	0.04	0.04	0.04	0	0	0.05	0	0	0	0.04	0	0.04	0	0.02	0.04	0	0.02	0.02	0.04	0	0.02	0.13
BnaA01G0104000ZS	0.56	0.33	0.43	0.36	0.3	0.55	0.29	0.35	0.54	0.32	0.41	0.5	0.63	0.45	0.58	0.46	0.38	0.26	0.4	0.51	0.31	0.42	0.38	0.59	0.24	0.54	0.42	0.36	0.44	0.52	0.52	0.54	0.36	0.34	0.32	0.54	0.33	0.67	0.49	0.37	0.79	0.37	0.39	0.63	0.53	0.4	0.78	0.32	0.55
BnaA01G0104100ZS	1.93	1.81	1.76	1.02	1.68	1.04	1.14	1.1	1.11	1.72	1.6	1.24	1.24	2.65	2.81	1.63	0.5	1.03	0.41	0.56	0.78	0.91	0.7	0.79	1.44	1.5	2.18	1.14	1.64	2.42	1.01	1.55	0.86	1.48	1.56	1.4	1.21	1.56	1.24	0.79	1.48	0.22	0.68	1.33	0.92	1	0.82	0.33	2.43
BnaA01G0104200ZS	0	0	0	0	0	0	0	0	0	0	0	0	0	0	0	0	0	0	0	0	0	0	0	0	0	0	0.11	0	0	0	0	0	0	0	0	0	0	0	0	0	0	0	0	0	0	0	0	0	0
BnaA01G0104300ZS	0.08	0	0.13	5.57	5.99	5.62	4.77	4.6	4.18	1.64	1.14	1.47	0.65	1.02	0.71	6.3	8.67	9.15	4.8	5.43	4.25	1.28	0.66	0.8	1.62	1.76	0.98	10.39	9.72	9.62	3.55	4.65	4.61	2	1.93	1.78	1.42	1.95	1.32	3.31	2.61	2.95	2.84	3.55	4.07	1.18	1.83	1.33	0.05
BnaA01G0104400ZS	1.41	0.67	0.38	0	0	0	0	0	0	0.06	0.07	0	6.65	6.71	8.16	0.69	0.08	0.19	0	0	0	0	0	0	0.07	0.14	0.31	0	0	0.08	0	0.07	0	0.07	0	0.08	8.41	5.69	6.35	0	0.2	0.15	0.07	0.07	0.41	0	0	0	3.64
BnaA01G0104500ZS	0.9	1.06	0.92	0.78	0.66	0.6	0.62	0.4	0.69	1.03	0.74	0.66	0.49	0.9	0.9	0.74	0.64	0.55	0.51	0.52	0.59	0.66	0.62	0.73	0.6	0.79	0.35	0.71	0.59	0.72	0.38	0.44	0.26	0.21	0.32	0.17	0.72	0.54	0.54	0.59	0.44	0.59	0.27	0.57	0.38	0.45	0.36	0.28	0.98
BnaA01G0104600ZS	0.13	0.14	0.17	0.01	0.02	0.04	0	0	0.03	0.02	0.19	0.04	0.2	0.19	0.11	0	0	0.02	0	0.02	0	0	0.02	0	0.16	0.14	0.12	0	0	0.02	0	0	0.04	0.05	0.05	0	0.06	0.07	0.06	0.05	0	0	0	0.03	0	0.07	0	0	0.07
BnaA01G0104700ZS	4.27	4.19	4.53	2.79	3.22	2.73	2.93	2.64	2.22	2.26	2.32	2.24	6.29	6.5	7.39	3.78	3.46	3.82	2.86	3.36	2.72	2.4	2.63	2.76	3.23	3.2	2.56	3.24	2.97	2.96	1.78	1.83	1.5	1.12	1.19	1.25	4.66	3.41	3.43	4.53	3.46	4.05	2.51	3.28	3.52	2.36	1.87	2.5	3.13
BnaA01G0104800ZS	2.26	5.42	4.43	6.98	5.92	5.37	5.9	2.74	5.32	4.45	2.95	3.37	5.35	5.87	5.55	6.34	5.08	5.64	5.27	3.89	4.81	3.94	4.09	4	0.33	1.09	1.31	0.67	1.44	0.96	0.84	0.45	0.38	0.08	0.29	0.94	4.8	5.29	5.2	6.51	6.33	7.47	4.26	4.26	4.23	3.32	4.39	4.46	1.71
BnaA01G0104900ZS	0	0	0	0	0	0	0	0	0	0	0	0	0	0.04	0.14	0.04	0.13	0.16	0	0.04	0.04	0	0.08	0.18	0	0	0	0	0	0	0	0	0	0	0	0	0	0.09	0.09	0.04	0.08	0.22	0	0	0.05	0	0	0	0
BnaA01G0105000ZS	0	0	0	0	0	0	0	0	0	0	0	0	0	0	0	0	0	0	0	0	0	0	0	0	0	0	0	0	0	0	0	0	0	0	0	0	0	0	0	0	0	0	0	0	0	0	0.06	0	0
BnaA01G0105100ZS	0	0	0	0	0	0	0	0	0	0	0	0	0	0.02	0.02	0	0	0	0	0	0	0	0	0	0	0	0	0	0	0	0	0	0	0.05	0.05	0.25	0	0.02	0	0	0.09	0	0	0	0	0	0	0	0
BnaA01G0105200ZS	0	0	0	0	0	0	0	0	0	0	0	0	0	0	0	0	0	0	0	0	0	0	0	0	0	0	0	0	0	0	0	0	0	0	0	0	0	0	0	0	0	0	0	0	0	0	0	0	0
BnaA01G0105300ZS	0	0	0	0	0	0	0	0	0	0	0	0	0	0.02	0.02	0	0	0	0	0	0	0	0	0	0	0	0	0	0	0	0	0	0	0.05	0	0	0	0.02	0	0	0.09	0	0	0	0	0	0	0	0
BnaA01G0105400ZS	0	0	0	0	0	0	0	0	0	0	0	0	0	0	0	0	0	0	0.11	0	0	0	0	0.04	0	0	0	0	0	0	0	0	0	0	0	0	0	0	0	0	0.04	0.04	0	0	0	0	0	0.15	0
BnaA01G0105500ZS	1.66	2.26	0.94	0	0	0.21	0	0	0	0	0	0.14	4.88	2.08	3.42	0.18	1.72	0.7	0.12	0.12	0.59	1.32	0	0.27	0	0.18	0	0	0.78	0.29	0	0	0	0.56	1.15	0.84	0.77	1.72	1.98	0.47	1.43	0.23	0.14	0.2	0.13	1.36	0	0.46	0.05
BnaA01G0105600ZS	3.43	3.39	1.59	6.65	7.86	5.59	5.21	4.02	2.98	6.58	4.3	6.68	5.08	4.74	3.89	8.6	7.61	8.14	5.45	7.07	5.56	4.65	4.34	2.83	2.49	3.72	2.99	3.38	4.25	4.99	4.34	2.12	3.06	5.59	4.59	6.8	2.6	2.91	0.82	3.17	2.86	2.81	2.01	2.32	2.34	5.71	6.52	6.61	1.88
BnaA01G0105700ZS	0.03	0.08	0.15	0	0	0.03	0.06	0	0.03	1.32	1.45	1.49	0	0	0.03	0.05	0.09	0	0	0.12	0.06	6.11	5.4	6.83	0.15	0	0.15	0.65	0.82	0.91	1.9	1.66	1.11	27.56	23.05	21.89	0.78	0.54	0.57	0.15	0.17	0.07	0.53	0.48	0.75	21.48	20.22	22.98	0.1
BnaA01G0105800ZS	0.05	0.14	0.15	0.05	0	0	0.05	0	0	0.19	0	0	0.16	0.46	0.06	0	0	0	0.04	0	0	0.04	0	0	0.21	0.55	0.11	0.05	0.05	0.17	0.11	0.37	0.25	0.05	0	0.06	0.08	0.72	0.49	0.05	0	0.2	0.42	0.05	0	0.12	0.23	0.19	0
BnaA01G0105900ZS	0	0.05	0	0	0	0	0	0	0	0	0	0	0	0	0	0	0	0.05	0	0	0	0	0	0	0	0	0	0	0	0	0	0	0	0	0	0	0	0	0	0	0.05	0	0	0	0	0	0	0	0
BnaA01G0106000ZS	17.08	16.3	15.3	11.83	12.1	13.12	16.42	15.81	17.35	14.54	12.57	12.58	14.43	14.71	15.44	12.98	11.5	10.6	12.51	13	13.04	10.95	11.32	10.64	10.39	10.26	9.99	10.26	9.79	9.32	17.54	17.97	17.29	15.17	14.07	15.15	9.86	11.52	9.31	8.06	9.25	8.44	12.97	14.24	13.6	12.44	14.29	12.28	11.76
BnaA01G0106100ZS	12.85	12.25	13.13	12.17	12.55	12.71	7.9	8.61	7.82	12.45	13.76	13.39	12.91	12.38	13.56	10.52	10.69	10.66	7.15	6.49	7.7	10.89	11.16	11.95	12.9	12.99	12.84	10.18	10.64	9.25	6.4	6.36	5.77	15.96	16.19	14.5	11.9	12.33	11.73	9.15	7.85	8.56	5.25	4.94	4.27	9.14	10.1	9.48	13.3
BnaA01G0106200ZS	1.25	1.25	1.22	1.31	1.57	1.59	1.08	0.95	1.07	1.31	1.03	1.18	1.64	1.31	1.85	1.68	1.64	1.47	1.67	1.13	1.69	1.28	1.28	1.9	0.86	0.95	1.17	1.27	1.41	0.9	0.61	0.65	0.65	0.87	0.84	1.1	1.05	0.88	1.12	1.48	1.62	1.15	0.52	0.9	0.74	0.83	0.81	0.91	1.58
BnaA01G0106300ZS	0.67	0.49	0.64	0.39	0.39	0.46	1.02	0.98	1.06	1.22	1.11	1.15	0.27	0.55	0.35	0.44	0.37	0.42	1	0.73	0.88	1.39	1.23	1.6	1.51	1.47	1.4	1.46	1.75	1.96	1.86	2	1.95	1	0.97	1.43	1.76	1.77	1.95	1.84	1.45	2.31	1.64	2.15	1.7	1.89	1.92	2.04	0.56
BnaA01G0106400ZS	0.06	0	0.03	0	0	0.06	0	0	0.03	0	0	0	0	0	0	0.03	0.06	0.22	0	0	0	0.08	0.06	0	0	0	0	0.13	0.03	0.03	0	0	0.07	0.06	0	0.03	0	0	0	0	0	0	0	0	0	0.17	0.17	0.22	0
BnaA01G0106500ZS	0.17	0	0	0.08	0	0.08	0	0	0	0	0	0.08	0.18	0.08	0	0.24	0.18	0.16	0	0.09	0	0	0	0	0.09	0	0	0.37	0	0.3	0	0	0	0	0	0	0	0	0	0.18	0.34	0.18	0.09	0.09	0	0	0	0	0.3
BnaA01G0106600ZS	2.76	2.25	2.38	1.83	1.59	1.64	1.54	2.16	1.54	0.68	1.16	1.35	3.82	3.27	3.96	3.33	5.21	5.32	3.65	5.32	5.96	1.53	1.24	1.24	0.96	2.22	1.52	1.4	2.46	1.41	0.43	1.05	0.82	0.88	0.23	0.57	1.91	1.96	1.8	4.02	4.01	4.19	2.65	2.87	3.22	0.71	1.4	0.95	1.3
BnaA01G0106700ZS	0.58	0.26	0	0.24	0	0	0	0	0	0	0	0	0	0	0.54	0	0.23	0	0	0	0	0	0.1	0	0	0	0.9	0.3	0	0	0	0	0	0.2	0	0	0	0.34	0.84	0	0	0	0.3	0.19	0	0	0	0.35	0.33
BnaA01G0106800ZS	0	0	0	0	0	0	0	0	0	0	0	0	0.06	0.1	0	0	0	0.05	0.09	0	0	0	0	0	0	0	0	0.06	0	0	0	0	0	0	0	0	0	0	0	0	0	0	0	0	0	0.06	0	0.13	0
BnaA01G0106900ZS	2.12	0.93	1.15	1.54	1.13	0	1.7	0.3	0	2.19	0.79	2.79	4.23	5.28	8.48	7.14	4.61	4.46	2.33	2.52	2.86	5.74	6.9	5.05	1.33	0.95	0.73	1.47	2.13	1.77	0	1.96	1.36	0.9	0.43	0.99	6.51	6.64	6.97	3.4	4.63	3.9	2.58	2.13	1.54	7.2	4.62	4.11	0
BnaA01G0107000ZS	4.25	5.01	4.74	2.62	3.75	2.72	4.07	3.57	3.59	3.41	4.55	3.39	5.3	4.99	4.51	5.84	4.19	4.98	5.21	3.76	3.61	5.63	4.87	4.26	2.99	3.24	4.24	3.46	6.53	5.19	3.68	2.71	2.5	3.9	2.52	4.27	2.52	3.53	4.47	4.01	3.78	4.88	3.2	2.91	4.8	3.6	4.58	5.23	3.77
BnaA01G0107100ZS	0.05	0	0.1	0	0.2	0.14	0	0.14	0.12	0	0.07	0.05	0.23	0.5	0.44	0.89	1.2	0.91	0.4	0.41	0.83	0.09	0.19	0.17	0	0.09	0	0.07	0.6	0.49	0.04	0	0.07	0	0.09	0	0.13	0.58	0.24	0.98	0.36	1.1	0.49	0.49	0.27	0.09	0.11	0	0.09
BnaA01G0107200ZS	9.67	8.28	8.57	25.96	25.52	25.92	2.75	2.85	2.21	1.09	0.99	1.29	19.11	16.22	15.66	25.02	22.58	24.13	5.97	6.05	6.39	1.37	1.5	0.93	21.57	20.77	21.52	9.41	9.11	8.07	1.98	1.52	2.39	0.52	0.65	0.45	20.32	19.7	18.68	11.39	12.17	12.52	5.05	3.87	4.22	0.92	0.65	1.16	8.06
BnaA01G0107300ZS	1.72	1.49	1.72	0.98	1.12	1.21	1.08	1.06	1.17	1.03	0.89	1.09	1.64	2.21	1.76	1.17	1.86	1.49	1.47	1.03	1.27	1.32	1.34	1.45	1.38	1.13	1.11	1.46	1.26	1.33	0.65	0.63	0.82	1.13	0.91	1.07	1.38	0.97	0.93	1.24	1.32	1.14	0.79	0.64	0.86	1.53	1.74	1.55	1.45
BnaA01G0107400ZS	0.37	0.27	0.32	0.13	0.06	0.27	0.16	0.13	0.31	0.1	0.2	0.21	0.58	0.54	0.57	0.22	0.24	0.33	0.15	0.2	0.29	0.32	0.15	0.24	0.2	0.28	0.27	0.3	0.15	0.12	0.17	0.2	0.15	0.24	0.28	0.41	0.37	0.22	0.36	0.25	0.31	0.22	0.12	0.27	0.08	1.45	0.6	0.52	0.32
BnaA01G0107500ZS	0.24	0.05	0.09	0.09	0.13	0.16	0.29	0.3	0.35	0.59	0.83	0.71	0.19	0.2	0.24	0.12	0.12	0.03	0.03	0.1	0.13	0.27	0.09	0.63	0.17	0.05	0.13	0.11	0.17	0.07	0.16	0.09	0.1	0.11	0.03	0.17	0.08	0.32	0.02	0.02	0.13	0.18	0.04	0.1	0.07	0.17	0.19	0.14	0.21
BnaA01G0107600ZS	0.01	0.05	0.04	0.78	0.9	0.86	0.42	0.48	0.37	0.68	0.68	0.8	0.03	0.06	0.01	1.09	1.13	0.76	0.63	0.62	0.68	0.77	0.64	0.74	0.02	0.09	0.03	0.46	0.4	0.48	0.32	0.33	0.48	0.24	0.3	0.28	0.09	0.12	0.07	0.35	0.42	0.48	0.41	0.3	0.32	0.32	0.41	0.43	0.04
BnaA01G0107700ZS	0	0.36	0.79	0	0	0	0.28	0	0.14	0	0.57	0.06	0	0	0.09	0	0.13	0.1	0	0	0	0.48	0.25	0	0	0.11	0	0.24	0.04	0.15	0	0.71	0.16	0.41	0	0.56	0	0.55	0.4	0	0	0.55	0	0.2	0	0	0	0	0
BnaA01G0107800ZS	0.13	0.24	0.08	0	0.01	0	0	0	0	0	0	0	0.04	0.05	0.01	0	0.01	0	0	0	0	0	0	0	0.05	0.02	0.04	0	0	0	0	0	0	0	0	0	0.03	0.03	0.02	0	0	0	0	0	0	0	0	0	0.1
BnaA01G0107900ZS	14.2	12.06	12.36	4.59	5.92	4.79	0.84	0.87	0.91	1.49	1.54	1.43	17.38	16.67	18.31	3.17	3.39	2.94	0.86	0.65	1.29	2.64	2.46	2.28	12.99	11.02	11.84	8.02	7.3	7.48	2.66	3.01	2.97	9	9.14	9.44	12.73	10.52	13.06	2.78	2.88	3.5	0.89	0.97	0.76	5.79	4.59	6.61	15.35
BnaA01G0108000ZS	0	0	0	0	0	0	0	0	0	0	0	0	0	0	0	0	0	0	0	0	0	0	0	0	0	0	0	0	0	0	0	0	0	0	0	0	0	0	0	0	0	0	0	0	0	0	0	0	0
BnaA01G0108100ZS	0.22	0.42	0.29	0.12	0.31	0.04	0.19	0.21	0.09	0.93	0.51	0.85	0.55	0.39	0.24	0.44	0.32	0.3	0.3	0.2	0.2	0.72	1.94	0.82	0.07	0.09	0.02	0.12	0.03	0.05	1.84	1.38	0.92	6.21	6.52	4.94	0.07	0.14	0.07	0.32	0.43	0.13	0.21	0.34	0.24	4.46	3.54	4.77	1.04
BnaA01G0108200ZS	0	0	0	0	0	0	0	0	0	0	0	0	0	0	0	0	0	0.02	0	0	0	0	0	0	0	0	0	0	0	0	0	0	0	0.05	0.06	0.09	0	0	0	0	0	0	0.03	0	0	0	0.12	0	0
BnaA01G0108300ZS	0	0	0	0.04	0.27	0	0.44	0.3	0.22	0.56	1.18	0.27	0.07	0	0	0	0	0	0.03	0.41	0.18	0	0	0.05	0.05	0	0	0	0	0.21	0.81	1.15	1.79	0.43	0.54	1.43	0.1	0	0.55	0.21	0.23	0.13	0.49	0.81	0.41	1.96	1.18	2.35	0
BnaA01G0108400ZS	0	0	0	0.18	0.13	0.15	0.05	0.12	0.07	0.02	0.05	0.09	0.16	0.21	0.24	0.62	0.36	0.51	0.26	0.27	0.22	0.09	0.23	0.12	0	0	0.01	0.09	0.01	0.04	0.06	0.08	0.12	0.06	0.07	0.01	0.02	0.06	0.09	0.16	0.05	0.18	0.32	0.17	0.17	0.28	0.31	0.43	0.04
BnaA01G0108500ZS	0	0	0	0	0	0.03	0	0	0	0	0	0	0	0	0	0	0	0	0	0	0	0	0	0	0	0	0	0	0	0	0	0	0	0	0	0	0	0	0	0	0	0	0	0	0	0	0	0	0
BnaA01G0108600ZS	0.31	0.2	0.44	0.1	0.56	0.13	0.31	0.28	0.28	0.24	0.27	0.57	0.78	0.44	0.4	0.27	0.24	0.34	0.39	0.3	0.33	0.17	0.45	0.35	0.07	0.66	0.6	0.46	0.12	0.98	0.17	0.52	0	0.52	0	0.43	0.3	0.2	0.31	0.3	0.14	0.19	0	0.12	0	0.78	0.58	0.08	0.6
BnaA01G0108700ZS	0.64	0.63	0	0.7	0.38	1.17	0.21	0.49	0.42	0.84	0.28	0.91	1.85	2.11	0.26	1.56	1.47	2.24	1.62	0.92	1.71	0.35	0.06	1.04	1.09	0.88	1.71	0	0	0	0	0.84	0.76	0	1.17	0.93	1.98	0.77	1.58	1.91	1.14	1.81	0	0.37	0.69	1.96	1.23	2.09	0
BnaA01G0108800ZS	1.27	2.09	1.16	0	1.44	1.04	0.01	0.03	0.33	0.49	0.93	1.16	3.27	1.34	2.11	0.06	0.17	0	0.44	0	0	2.46	1.98	1.49	0	0	0	2.59	1.08	0.54	1.14	0	0	1.93	0.8	0.26	0.18	0	0.14	0	0.71	0.32	0	0	0.09	1.4	2.32	1.03	2.28
BnaA01G0108900ZS	0	0	0	0	0.18	0	0.53	0	0.17	0.15	0	0.3	0.37	1.06	1.14	4.19	6.14	3.81	3.33	4.05	4.67	0.3	0	0	0	0	0	0.17	0.37	0	0.19	0.17	0.22	0.35	0.19	0.59	0.82	0.19	0.2	0	0.16	0	6.56	4.16	3.75	24.06	29.54	28.9	0
BnaA01G0109000ZS	16.94	19.47	22.41	13.1	11.33	10.29	3.07	3.84	2.37	3.18	2.77	1.31	16.06	15.99	16.46	13.21	13.35	9.01	4.02	4.77	5.7	0	1.71	1.49	10.96	9.49	3.47	5.42	1.3	2.76	6.27	2.41	4.85	2.62	0.97	2.38	11.37	12.09	11.1	8.03	7.03	10.55	6.24	6.52	6.97	1.08	1.43	1.02	15.82
BnaA01G0109100ZS	0.19	0.4	0.17	0.28	0.16	0.18	0.2	0.11	0.06	0.14	0.11	0.24	0.2	0.16	0.25	0.1	0.3	0.13	0.16	0.13	0.17	0.13	0.21	0	0.15	0.17	0.11	0.04	0.11	0.29	0.16	0.13	0.08	0.08	0.1	0.21	0.05	0.09	0.11	0.48	0.18	0.13	0.11	0.06	0.13	0.1	0.15	0.41	0.05
BnaA01G0109200ZS	20.57	19.59	20.76	18.99	21.56	21.79	9.16	9.88	9.38	8.12	7.58	7.4	17.95	20.58	21.02	22.15	22.83	22.18	11.23	11.33	11.92	6.95	6.53	6.74	15.83	14.11	14.11	14.6	12.82	13.58	7.47	8.26	7.97	11.8	12.57	11.63	12.72	14.17	12.28	8.97	9.31	9.7	10.24	8	8.21	9.17	8.21	8.62	17.98
BnaA01G0109300ZS	0	0	0	0	0	0	0	0.08	0	0	0	0	0	0	0	0	0	0	0	0	0	0	0	0	0	0	0	0	0	0	0	0	0	0	0	0	0	0	0	0	0	0	0	0	0	0	0	0	0
BnaA01G0109400ZS	1.99	2.04	1.93	0.07	1.1	0.9	0.48	0.35	0	0.3	0.75	0.09	0.96	1.3	0	1.92	0.33	1.66	0.81	0.89	1.49	0	0	0.13	1.56	0.89	1.59	1.84	0.74	0.99	0	0.64	1.22	0.06	0.23	0.21	1.28	1.46	0.93	0.6	1.11	0.75	0.74	0.49	0.93	0.19	0.29	0	1.14
BnaA01G0109500ZS	12.2	12.07	9.37	9.4	9.82	8.19	11.9	11.17	11.24	6.33	7.83	8.8	27.33	20.85	27.73	28.54	29.27	26.42	30.32	27.24	34.76	23.96	19.64	20.39	9.53	8.25	9.11	11.96	9.86	13.51	10.73	9.18	9.66	5.12	5.51	5.65	27.04	23.24	29.85	30.02	44.08	32.39	23.4	23.1	23.19	16.99	16.59	16.88	10.55
BnaA01G0109600ZS	2.95	2.2	1.75	4.03	3.74	4.16	1.69	1.87	1.52	1.9	1.8	1.56	3.73	4.2	3.68	3.77	4.3	3.98	2.55	2.45	2.2	3.2	2.95	3.35	3.7	4.22	3.86	1.84	2.41	0.83	2.54	2.13	2.62	2.97	3.31	2.97	4.48	3.44	3.97	1.83	1.72	1.51	2.52	0.85	1.29	6.15	5.89	6.23	3.23
BnaA01G0109700ZS	5.99	5.63	6.54	5.76	3.84	4.34	4.72	4.06	4.4	3.22	3.43	3.77	2.94	3.21	3.12	2.84	3.76	2.96	3.41	2.35	2.66	2.24	2.36	3.26	3.88	4.38	4.84	4.34	5.06	3.38	3.31	3.76	3.24	2.93	2.59	3.09	2.97	5.41	2.75	3.72	4.24	2.87	2.5	2.08	1.49	1.3	1.06	0.33	2.94
BnaA01G0109800ZS	0	0	0	0	0	0	0	0	0	0	0	0	0	0	0	0	0	0	0	0	0	0	0	0	0	0	0	0	0	0.09	0	0	0	0	0	0	0.09	0	0	0	0	0	0	0	0	0	0	0	0
BnaA01G0109900ZS	0.01	0.06	0	2.32	2.97	2.72	0.23	0.25	0.22	0.04	0	0.03	0.08	0.18	0.12	3.34	3.36	3.5	0.67	0.68	0.46	0.11	0.01	0	0.25	0.36	0.2	2.15	2.09	2.31	0.34	0.29	0.42	0.08	0.03	0.11	0.34	0.64	0.66	2.17	2.58	2.12	0.5	0.87	0.73	0.09	0.13	0.16	0
BnaA01G0110000ZS	0	0	0	0	0	0	0	0	0	0	0	0	0	0	0	0	0	0	0	0	0	0	0	0	0	0	0	0	0	0	0	0	0	0	0	0	0	0	0	0	0	0	0	0	0	0	0	0	0
BnaA01G0110100ZS	53.47	47.32	50.7	57.35	66.1	70.95	27.4	29.75	31.4	46.27	49.79	47.42	34.69	44.8	42.97	35.09	41.14	33.7	23.66	25.09	23.89	32.74	41.13	33.24	54.45	51.14	47.96	46.79	52.72	51.2	24.63	25.36	27.83	54.51	56.69	52.49	42.45	45.15	45.39	40.56	50.03	46.31	19.73	17.48	19.33	37.87	38.6	36.67	68.76
BnaA01G0110200ZS	3.26	3.23	3.51	2.45	2.78	2.18	2.19	1.68	2.07	3.02	1.73	2.28	0.36	0.63	0.23	0.59	0.93	1.56	1.31	1.3	1.52	2.15	2.69	1.84	2.57	2.42	2.04	2.27	3.24	2.23	1.63	2.47	1.84	2.36	2.8	3.38	0.85	1.79	0.64	1.52	1.73	0.91	1.36	1.05	1.09	2.28	0.75	1.88	3.11
BnaA01G0110300ZS	0.67	0.31	0.53	0.25	0.12	0.28	0.21	0.25	0.17	0.48	0.13	0.32	0.52	0.38	0.49	0.41	0.32	0.31	0.24	0.24	0.37	0.64	0.6	0.88	0.73	0.33	0.44	0.24	0.2	0.16	0.15	0.08	0.06	0.28	0.46	0.44	0.38	0.57	0.59	0.32	0.42	0.33	0.1	0.14	0.08	0.73	0.65	0.63	0.6
BnaA01G0110400ZS	0.2	0.48	0.39	0.21	0.2	0.19	0.12	0.22	0.11	0.16	0.25	0.21	0.13	0.2	0.05	0.04	0.11	0.47	0.27	0.13	0.05	0.13	0.22	0.09	0.11	0.35	0.19	0.04	0.5	0.34	0.16	0.22	0.09	0.22	0.38	0.21	0.29	0.26	0.16	0.15	0	0	0	0.11	0.13	0.04	0.17	0.54	0.17
BnaA01G0110500ZS	0.24	0.28	0.43	0.23	0.15	0.26	0.06	0.14	0.22	0.53	0.31	0.24	0.32	0.22	0.25	0.12	0.25	0.08	0.13	0.23	0.07	0.38	0.22	0.29	0.12	0.24	0.19	0.22	0.12	0.03	0.08	0.15	0.21	0.28	0.31	0.21	0.17	0.09	0.14	0.15	0.06	0.16	0.06	0.04	0.17	0.26	0.23	0.33	0.34
BnaA01G0110600ZS	0.06	0.37	0.06	0	0	0	0	0	0	0	0	0	0	0.11	0	0	0	0.11	0	0	0	0	0	0	0.42	0.29	0.37	0.87	1.34	0.54	0.13	0.13	0.07	1.01	0.75	0.73	0.13	0.24	0.13	0.12	0	0.3	0	0	0	2.1	1.99	2.92	0
BnaA01G0110700ZS	0	0.05	0	0	0	0	0	0	0	0	0	0	0.38	0.05	0.23	0	0	0	0	0	0	0	0	0	0.05	0	0.33	0	0	0	0	0	0	0	0	0	0	0.05	0	0	0	0	0	0	0	0	0	0	0.06
BnaA01G0110800ZS	4.71	3.93	4.33	15.05	15.66	14.92	0.1	0.07	0	0.08	0	0.09	16.71	15.44	16.77	16.55	17.91	17.8	0.66	0.49	0.79	0	0	0	15.34	14.21	13.93	7.25	7.4	6.7	0.19	0.21	0.19	0	0.12	0.1	15.9	15.8	17.33	6.81	5.3	4.99	0.41	0.48	0.21	0.13	0.02	0.03	3.88
BnaA01G0110900ZS	1.72	1.32	1.15	0.21	0.09	0.02	0.26	0.22	0.13	0.53	0.36	0.51	3.3	3.22	3.67	1.81	1.64	1.61	2.37	2.15	2.04	1.43	1.77	1.42	0.77	0.66	0.5	0.02	0.02	0.02	0.37	0.39	0.33	0.69	0.68	0.89	2	1.79	2.23	0.37	0.69	0.53	1.28	1.48	1.39	2.75	2.6	2.5	2.56
BnaA01G0111000ZS	0.94	0.79	0.69	1.18	0.7	0.96	2.24	2	2.16	1.23	1.23	1.07	1.95	1.72	3.59	2.05	1.65	1.62	3.11	2.35	3.82	3.19	2.23	2.4	2.67	1.86	3.32	3.53	3.94	3.31	5.14	4.28	4.95	4.27	4.68	5.35	6.61	6.76	7.01	5.66	4.55	5.27	6.24	5.47	6.46	20.95	22.97	21.84	2.3
BnaA01G0111100ZS	0	0	0	2.07	0	0	1.32	0	0	0	0.4	0	0.06	0	2.68	3.63	2.9	2.97	2.22	2.73	2.72	3.84	2.17	4.47	0	0	0	0	0	0.12	1.99	0.15	0	0	0	2.12	2.89	2.51	1.76	4.34	2.92	3.97	3.54	1.73	2.79	0.68	1.24	0.52	0.03
BnaA01G0111200ZS	8.47	5.69	6.27	8.37	8.87	10.2	6.46	8.39	7.61	6.78	8.56	7.1	4.69	6.44	8.6	9.7	8.24	6.72	7.43	8.31	9.22	9.28	8.55	10.62	8.87	6.65	8.23	8.83	8.99	10.69	7.16	6.14	7.01	7.81	8.29	9.06	7.94	7.85	8.68	10.55	10.06	10.07	7.14	4.71	6.45	6.11	7.66	6.65	8.66
BnaA01G0111300ZS	0	0	0	0.08	0	0	0	0	0.02	0.06	0.05	0	0	0.02	0	0.31	0.22	0.29	0	0.02	0	0.08	0.04	0.16	0	0.04	0	0	0.02	0	0.21	0.34	0.13	0.78	0.59	0.84	0.02	0	0.02	0	0	0.02	0.08	0.07	0.03	3.56	4.21	3.82	0.02
BnaA01G0111400ZS	2.08	0	0	0	0	0	0	0.15	0.34	0.04	0.58	0.79	4.91	5.84	7.3	2.59	3.55	2.72	1.77	0.38	0.27	0	1.02	0.55	0	0.1	0	0	0	0.3	0	0	0	0	0.21	0	2.85	3.77	6.6	0	1.11	0	0.96	0	0	1.21	0.05	0.84	0
BnaA01G0111500ZS	5.28	5.23	5.36	2.07	2.24	2.15	2.71	3.11	3.55	2.24	2.77	2.26	3.89	6.56	4.5	1.93	1.39	1.56	2	1.25	2.07	1.95	2.06	2.35	7.96	5.57	5.35	3.07	3.41	3.28	3.29	2.72	2.61	4.14	3.66	4.22	4.41	4.51	4.47	1.8	2.84	2.45	1.91	1.78	3.47	3.44	3.3	3.88	4.74
BnaA01G0111600ZS	0	0	0	0	0	0	0	0	0	0	0	0	0.17	0	0	0.08	0	0.08	0	0.08	0.1	0	0	0	0	0	0.18	0	0.19	0	0	0.09	0	0.08	0.1	0	0	0	0	0	0	0	0	0.2	0	0	0	0	0
BnaA01G0111700ZS	0.49	0.68	0.85	0	0.15	0	0.61	0.82	0.48	0.38	0.87	0	0.13	0	0.39	0	0	0.1	0	0	0	0	0	0	0	0	0.42	0.52	0.62	0.81	0.45	1	0.36	0.06	0	0	0.08	0	0.24	0	0	0	0.16	0	0.11	0	0	0	0
BnaA01G0111800ZS	4.2	3.88	3.3	5.36	5.91	6.06	3.08	3.65	3.23	3.37	2.76	2.84	1.44	1.39	1.13	1.32	0.92	0.93	0.62	0.58	0.67	0.36	0.42	0.35	1.54	1.32	1.77	1.33	1.5	1.2	0.9	0.72	0.65	0.28	0.42	0.45	1.27	1.21	1.47	0.37	0.47	0.33	0.23	0.32	0.35	0.21	0.21	0.29	1.8
BnaA01G0111900ZS	4.45	4.72	4.7	6.02	3.98	3.94	2.15	1.05	0.87	0.6	1.48	1.66	6.7	7.94	7.29	7.23	7.42	7.65	3.96	3.8	4.37	2.09	1.89	1.95	3.42	3.86	2.82	3.39	2.08	3.26	1.33	1.37	0.56	0.75	0.5	0.16	6.34	5.81	5.98	4.9	5.7	4.86	2.39	3.57	2.7	0.74	0.91	0.58	5.71
BnaA01G0112000ZS	4.73	5.67	5.67	1.79	0	0	1.06	1.74	0.67	2.5	2.59	2.26	7.42	6.88	6.12	0	1.16	0.55	1.11	1.81	1.15	1.06	0.58	1.78	3.44	2.38	3.37	1.2	1.78	1.25	0.68	0	0.25	0.14	0.31	0.3	1.45	3.09	1.75	1.87	1.08	1.39	0.78	0.92	0.45	1.5	1.04	0.75	2.42
BnaA01G0112100ZS	0.04	0.12	0	0	0	0	0	0.05	0	0	0	0	0.04	0	0	0	0	0	0	0	0	0	0	0	0	0	0	0	0.05	0.05	0	0	0	0	0	0	0	0	0	0	0	0	0	0	0	0	0	0.05	0
BnaA01G0112200ZS	0	0.08	0	0	0	0	0.28	0.18	0.11	0.55	0.95	0.79	0	0	0.05	0	0.09	0	0	0	0.06	0.46	0.41	0.42	0.04	0	0	0	0.06	0	0.81	1.14	1.13	2.41	3.05	3.76	0.05	0	0	0.09	0	0.04	0.44	0.31	0.35	3.87	3.84	3.97	0
BnaA01G0112300ZS	0.4	0.29	0.42	9.13	9.02	9.04	0.1	0	0.45	0.08	0	0.12	0.52	0.34	0.86	2	2.2	2.21	0.42	0.17	0.23	0.2	0.25	0.04	2.23	2.35	2.87	3.11	3.09	2.42	0.3	0.43	0.67	0	0.05	0	0.71	1.52	1.56	1.55	0.46	0.99	0.24	0.34	0.7	0	0.05	0.06	0.21
BnaA01G0112400ZS	59.25	63.41	61.39	4.44	2.03	3.69	0.52	1.22	0.6	0.32	0.2	0.24	24.08	28.45	26.09	4.04	2.48	1.77	0.27	0.19	0.23	0	0.08	0	22.95	29.99	25.09	0.98	0.94	1.63	0.75	1.23	1.11	0.03	0.48	0.17	23.19	29.27	25.58	1.66	1.76	2.18	0.65	0.36	1.07	0.15	0	0.06	39.19
BnaA01G0112500ZS	1.78	2.07	1.94	2.37	1.53	2	0.59	0.27	0.35	0.33	0.66	0.14	2.25	1.75	2.26	0.43	1.43	1.64	0.25	0.54	0.29	0.03	0.21	0.18	4.67	4.48	4.89	0.39	0.66	0.62	0.63	0.08	0.39	0.18	0.05	0.25	2.4	2.25	3.97	1.02	0.16	0.69	0.31	0.66	0.34	0.1	0.08	0.32	0.37
BnaA01G0112600ZS	0.05	0.14	0.05	1.29	0.8	0.74	0.19	0.64	0	0	0.05	0.09	0.21	0.51	0.16	1.59	1.74	1.31	0.64	0.72	0.36	0.22	0.32	0.24	0.26	0.44	0.26	0.42	0.45	0.63	0.27	0.14	0.06	0	0.06	0	0.72	0.97	1.2	1.14	1.02	1.92	0.52	0.51	0.91	0.34	0.46	0.31	0
BnaA01G0112700ZS	0	0	0	0	0	0	0	0	0	0	0	0	0	0	0	0	0	0	0	0	0	0	0	0	0	0	0	0	0	0	0	0	0	0	0	0	0	0	0	0	0	0	0	0	0	0	0	0	0
BnaA01G0112800ZS	0	0	0	0	0	0	0	0	0	0	0	0	0	0	0	0	0	0	0	0	0	0	0	0	0	0	0	0	0	0	0	0	0	0	0	0	0	0	0	0	0	0	0	0	0	0	0	0	0
BnaA01G0112900ZS	0.94	1.22	1.15	0.86	0.71	0.63	0.42	0.53	0.54	0.35	0.28	0.41	1.42	1.45	1.15	0.53	0.69	0.72	0.33	0.52	0.47	0.25	0.22	0.26	0.83	1.18	1.25	0.42	0.47	0.61	0.31	0.51	0.18	0.21	0.27	0.32	0.7	0.74	0.93	0.54	0.3	0.41	0.26	0.42	0.47	0.35	0.52	0.48	0.83
BnaA01G0113000ZS	0.7	0.66	0.43	0.22	0.16	0.27	0.26	0.22	0.14	0.55	0.26	0.49	0.52	0.65	0.34	0.42	0.59	0.31	0.37	0.3	0.43	0.42	0.69	0.67	0.39	0.19	0.48	0.3	0.45	0.37	0.34	0.14	0.14	0.31	0.29	0.39	0.51	0.59	0.65	0.55	0.54	0.23	0.26	0.12	0.33	0.09	0.42	0.35	0.92
BnaA01G0113100ZS	0.1	0.13	0.12	0.3	0.21	0.2	0.03	0.03	0	0.02	0	0.02	0.1	0.26	0.17	0.11	0.23	0.11	0.05	0.04	0.05	0.01	0	0.05	0.22	0.25	0.18	0.14	0.07	0.11	0	0.06	0.01	0.01	0.01	0.05	0.17	0.12	0.01	0.1	0.14	0.03	0.04	0.01	0	0	0.03	0.03	0.11
BnaA01G0113200ZS	0	0	0	0	0	0	0	0	0	0	0	0	0	0	0	0	0	0	0	0	0	0	0	0	0	0	0	0	0	1.07	0	0	0	0	0	0	0	0	0	0	0	0	0	0	0	0.04	0	0	0
BnaA01G0113300ZS	3.79	5.92	4.55	4.8	3.09	5.23	4.15	5.2	3.45	2.72	4.79	5.06	9.18	5.33	8.96	8.5	7.84	7.29	5.86	3.31	5.64	5.23	4.55	6.22	8.85	8.74	6.85	8.18	6.62	6.57	3.71	3.37	8.26	4.92	2.79	4.43	6.28	8.49	12.19	4.29	4.16	5.22	3.32	5.4	3.04	0.59	3.48	0.7	10.71
BnaA01G0113400ZS	0.02	0	0	0.08	0	0.08	0.05	0.02	0.07	0.08	0	0.06	0.04	0	0.05	0	0	0	0.04	0	0.02	0.08	0.08	0.21	0	0.06	0.07	0.14	0.09	0.1	0.02	0.02	0.05	0.02	0.1	0.1	0	0.02	0	0	0	0	0.02	0.04	0	0.02	0.3	0.21	0.02
BnaA01G0113500ZS	0.99	1.37	1.32	1.53	1.14	1.45	1.51	0	0	0.85	0.48	0.93	0	0	0	0	0	0	0	0	0	0	0	0	2.36	3.02	3.25	3.16	2.16	3.68	2.36	1.46	1.1	1.15	1.7	0.72	0	0	0	0	0	0	0	0	0	0	0	0	0
BnaA01G0113600ZS	2.79	2.09	2.3	2	1.73	2.04	1.56	1.82	1.23	2.6	2.55	2.84	1.01	0.98	0.97	0.46	0.38	0.4	0.22	0.24	0.43	0.37	0.21	0.15	2.09	1.83	2.01	1.46	1.6	1.97	1.42	1.42	1.59	1.92	2.45	2.71	0.41	0.95	0.25	0.19	0.09	0.28	0.29	0.28	0.23	1.17	0.59	0.51	2.13
BnaA01G0113700ZS	0	0	0	0	0	0	0	0	0	0	0	0	0	0	0	0	0	0	0	0	0	0	0	0	0	0	0	0	0	0	0	0	0	0	0	0	0	0	0	0	0	0	0	0	0	0	0	0	0
BnaA01G0113800ZS	0	0	0	0	0	0	0	0	0	0	0	0	8.07	0.34	0	17.46	13.67	13.36	10.37	10.24	11.31	21.9	20.69	20.36	0	0	0	0	0	0	0	0	0	0	0	0	11.19	18.54	8.41	16.02	13.24	17.27	10.1	7.74	8.99	0	0	0	0
BnaA01G0113900ZS	0.92	0.84	0.97	0.37	0.62	0.39	0.53	0.46	0.3	0.18	0.35	0.63	0.75	0.83	0.81	0.51	0.44	0.62	0.74	0.28	0.4	0.53	0.38	0.16	0.62	0.5	0.94	1.05	0.78	0.94	0.17	0.29	0.19	0.02	0.11	0.13	0.61	0.4	0.28	0.71	0.44	0.3	0.18	0.2	0.28	0.22	0.29	0.12	1.14
BnaA01G0114000ZS	20.02	21.32	18.02	8.72	9.5	8.39	8.01	6.7	7.12	5.44	4.14	5.13	13.94	13.98	14.39	7.97	8.2	9.52	8.15	8.96	8.27	2.64	2.28	4.61	9.44	9.1	9.25	6.57	6.85	6.55	5.95	4.71	4.41	3.17	2.34	2.85	10.05	8.53	9.67	5.77	4.57	4.9	6.39	6.17	6.59	4.18	4.07	3.68	15.45
BnaA01G0114100ZS	0.04	0.17	0.08	0.13	0.08	0	0.04	0	0.04	0.1	0.2	0.26	0.08	0.14	0.04	0.34	0.5	0.1	0.16	0.08	0.16	0.13	0.03	0	0	0.07	0.04	0.16	0	0.11	0.04	0.2	0.09	0.19	0.09	0.08	0	0.08	0	0.27	0.04	0	0	0.15	0.05	0.04	0.13	0.23	0.13
BnaA01G0114200ZS	0	0	0	0	0	0	0	0	0	0	0	0	0	0	0	0	0	0	0	0	0	0	0	0	0	0	0	0	0	0	0	0	0	0	0	0	0	0	0	0	0	0	0	0	0	0	0	0	0
BnaA01G0114300ZS	0	0	0	0	0	0	0	0	0	0	0	0	0	0	0	0	0	0	0	0	0	0	0	0	0	0	0	0	0	0	0	0	0	0	0	0	0	0	0	0	0	0	0	0	0	0	0	0	0
BnaA01G0114400ZS	3.12	1.31	1.97	1.94	1.64	1.67	2.63	3.22	2.64	1.66	1.78	2.67	1.34	2.5	2.24	1.46	1.43	1.49	1.94	1.12	1.9	2.51	1.49	1.63	2.33	2.44	1.7	1.59	1.23	2.27	2.62	3.65	3.83	2.11	2.52	3.74	2.26	0.83	1.89	1.38	1.84	1.59	1.18	1.91	1.01	3.08	3.68	3.82	1.77
BnaA01G0114500ZS	0	0	0	0	0	0	0	0	0	0	0	0	0	0	0	0	0	0	0	0	0	0	0	0	0	0	0	0	0	0	0	0	0	0	0	0	0	0	0	0	0	0	0	0	0	0	0	0	0
BnaA01G0114600ZS	0	0	0	0	0	0	0	0	0	0	0	0	0	0	0	0	0	0	0	0	0	0	0	0	0	0	0	0	0	0	0	0	0	0	0	0	0	0	0	0	0	0	0	0	0	0	0	0	0
BnaA01G0114700ZS	0.2	0	0	0.11	0	0.02	0	0	0	0.02	0	0	0	0	0	0.02	0.18	0	0	0	0.03	0	0	0	0	0	0	0	0	0	0	0	0	0	0.06	0	0.45	0	0	0.05	0.02	0.08	0	0	0	0	0	0	0.11
BnaA01G0114800ZS	89.64	84.31	84.95	51	43.44	50.04	11.78	12.97	13.84	4.34	5.66	4.55	55.98	68.71	68.67	36.49	32.21	32.15	12.41	14.3	14.26	1.95	3.04	2.07	57.85	53.75	53.95	62.48	57.14	59.73	12.51	12.3	12.22	3.9	3.99	4.19	45.62	50.68	46.65	33.02	36.17	33.46	15.57	15.73	16.09	2.42	2.39	1.93	69.41
BnaA01G0114900ZS	0	0	0	0.27	0	0.14	0	0	0.04	0	0.05	0.08	0	0	0.05	0	0.08	0.06	0.03	0	0	0.12	0	0	0	0	0	0.12	0	0	0.17	0	0	0	0.11	0.13	0	0	0.2	0	0	0	0.28	0	0.06	0	0	0	0
BnaA01G0115000ZS	0	0	0.07	0	0	0	0.07	0	0.14	0.06	0.28	0	0.07	0	0.15	0	0.14	0	0.17	0.27	0.41	0.06	0	0	0	0	0	0	0	0	0	0.21	0.16	0.2	0	0	0	0	0	0.07	0	0	0.16	0.5	0.4	0	0.08	0	0.04
BnaA01G0115100ZS	0	0	0	0	0	0	0	0	0	0	0	0	0	0	0	0	0	0	0	0	0	0	0	0	0	0	0	0	0	0	0	0	0	0	0	0	0	0	0	0	0	0	0	0	0	0	0	0	0
BnaA01G0115200ZS	0	0	0	0	0	0	0	0	0	0	0	0	0	0	0	0	0	0	0	0	0	0	0	0	0	0	0	0	0	0	0	0.04	0	0	0	0	0	0	0	0	0	0	0	0	0	0	0	0.05	0
BnaA01G0115300ZS	14.78	11.42	11.01	9.05	12.22	13.64	14.17	13.98	15.38	13.74	13.11	12.17	11.18	12.9	12.91	9.37	9.91	9.56	12.21	10.84	10.9	11.28	11.28	10.91	12.03	12.67	11.22	20.8	18.32	19.54	14.57	14.04	13.13	15.45	16.48	16.8	10.1	7.84	9.29	13.19	16.72	13.62	9.74	8.46	9.85	12.57	10.76	12.12	9.97
BnaA01G0115400ZS	0.08	0	0.05	0	0.05	0	0	0	0.03	0	0	0	0.1	0	0	0	0	0.09	0	0	0	0	0	0	0.08	0.34	0.13	0.08	0.05	0.14	0.05	0.03	0	0	0.08	0.19	0.05	0.08	0	0.08	0	0	0	0	0	0.43	0.43	0.25	0.06
BnaA01G0115500ZS	0.22	0.04	0.06	0.45	0.06	0.01	0	0	0	0.01	0	0	0.96	0.47	0.92	0.04	0.24	0.05	0	0	0	0	0	0	1.84	1.54	1.66	0.12	0	0.17	0	0	0.25	0.15	0	0.03	0.53	0.41	1.35	0	0.07	0	0	0.07	0	0.01	0.19	0	0
BnaA01G0115600ZS	0	0	0	0	0.12	0.16	0.12	0.12	0	0	0.06	0	0	0	0	0.1	0	0.15	0.09	0	0.17	0	0.15	0.05	0	0	0	0	0.24	0.19	0	0.06	0	0.06	0	0	0	0.06	0	0.17	0.05	0	0	0	0.2	0	0.13	0.07	0
BnaA01G0115700ZS	0.45	0.64	0.65	0.41	0.5	0.5	0.47	0.24	0.21	0.18	0.33	0.3	0.54	0.97	0.64	0.43	0.4	0.49	0.31	0.27	0.31	0.28	0.19	0.3	0.36	0.52	0.62	0.56	0.62	0.62	0.33	0.32	0.27	0.18	0.14	0.22	0.47	0.41	0.37	0.62	0.33	0.5	0.22	0.66	0.23	0.4	0.29	0.34	0.64
BnaA01G0115800ZS	0	0	0	0	0	0.12	0	0	0	0	0	0	0	0	0	0.03	0	0	0	0	0	0	0	0	0	0	0	0.11	0.2	0.43	0	0	0.04	0.1	0	0.05	0	0	0	0.26	0.03	0.29	0	0	0	0.14	0.18	0.12	0
BnaA01G0115900ZS	0	0	0	0	0	0	0	0	0	0	0	0	0	0	0	0	0	0	0	0	0	0	0	0	0	0	0	0	0	0	0	0	0	0	0	0	0	0	0	0	0	0	0	0	0	0	0	0	0
BnaA01G0116000ZS	0	0	0	0	0	0	0	0	0	0	0	0	0	0	0	0	0	0	0	0	0	0	0	0	0	0	0	0	0	0	0	0	0	0	0	0	0	0	0	0	0	0	0	0	0	0	0	0	0
BnaA01G0116100ZS	4.09	4.74	3.77	2.04	1.42	1.93	3.18	3.25	3.46	3.7	1.77	3.99	1.69	2.41	0.31	0.09	0	0	0.58	2.16	1.43	2.26	2.04	2.67	2.3	3.36	0.99	4.98	4.57	4.71	4.31	2.37	3.29	2.36	1.22	2.95	3.32	2.61	1.44	2.51	2.13	2.89	1.51	0	2.78	1.63	1.89	2.54	0
BnaA01G0116200ZS	3.81	4.4	4.36	5.35	6.4	4.93	2.82	2.33	4.07	1.72	2.07	2.37	1.43	2.39	2.83	2.28	2.58	2.57	2.31	4.02	2.05	0.91	2.26	1.37	4.12	4.23	3.75	4.02	4.47	3.56	3.54	2.86	2.38	1.68	0.74	2.84	3.18	3.58	2.56	2.82	4.52	4.9	2.43	1.23	2.46	1.91	2.59	2.56	2.99
BnaA01G0116300ZS	6.13	5.2	6.3	0.71	0.48	0.14	0.99	1.27	1.73	1.67	1.26	2.18	2.22	2.34	2.19	2.57	2.44	1.85	2.15	2.15	1.64	5.14	2.67	4.11	0.91	0.83	1	1.1	0.91	1.71	0.76	1.42	0.97	1.45	1.6	2.07	2.26	1.84	1.41	1.8	1.84	1.51	2.28	2.18	2.17	1.42	1.62	1.84	3.82
BnaA01G0116400ZS	0	0	0	0	0.45	0.4	0.06	0.03	0.09	0	0	0	0.07	0	0	0.56	0	0	0.25	0.11	0.28	0	0	0	0	0	0.16	0	0	0	0	0	0.81	0.09	0	0	0	0.63	0	0	0.11	0	0	0	0	0	0	0	0.35
BnaA01G0116500ZS	0	0.11	0	0	0	0	0	0.24	0	0	0	0	0	0	0	0	0.15	0	0	0	0	0.1	0.07	0	0	0.34	0	0.17	0	0	0	0	0	0.03	0	0	0	0	0.13	0.06	0	0	0	0	0	0	0	0.52	0
BnaA01G0116600ZS	0.35	0.23	0.11	0.48	0.28	0.26	0.06	0.05	0.01	0.04	0.13	0.1	0.48	0.47	0.38	0.44	0.39	0.37	0.14	0.18	0.14	0.15	0.08	0.14	0.33	0.41	0.4	0.21	0.15	0.3	0.07	0.05	0.07	0.12	0.07	0.08	0.49	0.41	0.48	0.23	0.09	0.05	0.15	0.15	0.11	0.3	0.46	0.29	0.48
BnaA01G0116700ZS	2.91	2.46	2.92	2.83	2.27	2.55	3	2.44	2.32	2.28	2.66	2.52	2.31	2.22	2.41	2.75	2.73	2.45	2.52	2.48	2.43	2.85	3.03	3.2	1.88	1.8	1.87	3.32	3.56	2.89	2.14	1.91	1.66	1.83	1.08	1.13	1.65	1.76	1.28	3.02	2.8	2.55	2.11	2.33	2.3	1.2	1.56	1.62	2.42
BnaA01G0116800ZS	7.31	7.79	7.59	10.35	13.83	14.55	6.78	8.15	8.28	3.18	6.27	4.29	6.92	7.97	8.5	10.45	9.9	8.32	7.43	4.54	7.84	5.49	4.36	1.9	17.06	15.9	13.89	31.21	27.04	29.19	14.55	10.84	12.55	10.55	8.94	10.86	17.96	15.78	16.22	19.16	16.09	14.29	7.73	7.51	7.74	6.78	5.49	5.66	6.48
BnaA01G0116900ZS	17.2	17.03	16.47	7.39	4.82	6.82	5.47	5.34	4.4	3.98	3	3.18	39.11	40.08	41.49	16.2	15.27	18.51	15.08	17.16	15.68	11.35	13.3	13.8	24.22	21.02	23.95	18.6	16.11	18.42	4.3	4.85	4.07	1.95	1.36	1.16	47.71	49.27	50.47	39.1	32.89	36.29	14.16	14.1	14.19	6.96	6.4	5.92	18.26
BnaA01G0117000ZS	3.57	3.1	3.56	1.14	1	0.97	0.2	0.11	0.12	0.19	0.6	0.39	5.28	4.38	3.72	1.86	1.74	1.91	1.01	0.7	1.23	0.83	1.13	0.76	2.1	1.61	1.95	0.06	0.4	0.23	0.28	0.06	0.17	0.09	0.2	0.1	3.9	3.64	3.85	1.21	1.39	1.55	1.24	0.99	1.07	1.11	1.25	0.98	1.91
BnaA01G0117100ZS	2.19	1.94	2.28	4.24	4.78	5.06	4.23	4.03	4.79	5.62	5.66	5.16	9.55	10.3	9.26	16.53	15.68	17.47	10.59	10.86	9.83	12.87	11.35	12	3.26	3.1	3.01	8.74	9.46	8.62	4.15	4.53	3.77	2.4	2.76	3.19	9.73	9.82	10.23	13.57	15.47	14.72	8.08	7.94	8.55	7.38	7.25	6.74	4.15
BnaA01G0117200ZS	0	0.04	0	0	0	0	0	0	0.04	0	0	0	0	0.05	0.05	0	0.05	0.04	0	0	0	0.04	0	0.13	0	0.04	0.08	0	0	0.05	0.09	0	0.05	0	0	0	0	0	0.26	0.11	0	0.05	0	0.05	0	0	0	0.12	0
BnaA01G0117300ZS	0.04	0.24	0.19	0	0.12	0.04	0.04	0.12	0	0.03	0.08	0.16	0	0.26	0	0.08	0.18	0.54	0.13	0.31	0.23	0.03	0.15	0.25	0.2	0.16	0.24	0	0	0.13	0.25	0.16	0	0.11	0	0	0.2	0.08	0.2	0.23	0.04	0.34	0.16	0.15	0	0.3	0.24	0.23	0.04
BnaA01G0117400ZS	0	0	0	0	0	0	0	0	0	0	0	0	0.04	0	0	0	0	0	0	0	0	0	0	0	0	0	0	0	0	0	0	0	0	0	0	0	0	0	0	0	0	0	0	0	0	0	0	0	0
BnaA01G0117500ZS	1213.19	1173.05	1188.4	139.97	129.34	133.28	34.24	34.59	33.26	21.48	20.84	21.52	563.21	529.02	538.7	215.23	211.45	213.14	103.27	101.26	106.52	11.55	11.78	11.27	758.82	778.73	764.01	261.42	245.71	255.23	20.61	22.35	21.29	5.47	7.87	8.77	453.16	434.74	445.48	130.8	126.15	126.73	38.83	38.29	40.28	14.31	13.37	9.83	466.18
BnaA01G0117600ZS	0.35	0.49	0.61	0.31	0.61	0.4	0.52	0.21	0.38	0.63	0.48	0.3	1.09	1.49	1.22	1.8	1.05	0.76	0.78	0.77	0.61	0.92	0.66	0.88	0.42	0.45	0.37	0.59	0.39	0.67	0.44	0.52	0.43	0.9	0.97	1.06	1.08	1.43	1.16	0.89	0.94	1.37	1	0.74	0.49	1.45	1.1	0.89	0.6
BnaA01G0117700ZS	0	0	0	0	0	0	0	0	0	0	0	0	0	0	0	0	0	0	0	0	0	0	0	0	0	0	0	0	0	0	0	0	0	0	0	0	0	0	0	0	0	0	0	0	0	0	0	0	0
BnaA01G0117800ZS	0.07	0.3	0.24	0.09	0.02	0.06	0.01	0	0.09	0.13	0.08	0.04	0.88	1.13	0.96	0.48	0.37	0.31	0.14	0.14	0.1	0.11	0.09	0.17	0.04	0.04	0.07	0.07	0.06	0.07	0.02	0.03	0	0.03	0.08	0.03	0.53	0.71	0.8	0.23	0.2	0.41	0.17	0.16	0.17	0.1	0.13	0.09	0.03
BnaA01G0117900ZS	4.08	3.93	2.02	13.86	13.12	10.96	28.42	29.63	29.59	23.53	23	24.61	4.41	4.09	2.92	10.71	11.79	10.76	13.52	14.06	14.04	11.75	13.16	15.03	12.33	13.37	11.27	7.27	8.15	8.9	29.16	30.75	31.18	60.81	58.58	51.95	8.37	8.8	9.23	9.3	8.4	10.01	22.81	24.42	25.49	15.77	16.69	17.84	3.7
BnaA01G0118000ZS	6.03	5.29	5.51	3.62	3.7	4.47	2.64	2.83	3.09	2.67	3.37	2.91	7.14	7.47	7.15	3.63	3.73	3.98	3.14	3.31	3.17	2.62	2.99	3.17	4.57	4.92	5.12	3.25	3.5	3.32	2.15	2.03	2	1.74	2.6	2.17	3.93	4.57	4.23	2.9	3.07	3.25	2.34	1.89	2.4	3.33	3.15	3.26	6.49
BnaA01G0118100ZS	0	0	0	0	0	0	0	0	0	0	0	0	0	0	0	0	0	0	0	0	0	0	0	0	0	0	0	0	0	0	0	0	0	0	0	0	0	0	0	0	0	0	0	0	0	0	0	0	0
BnaA01G0118200ZS	9.22	10.74	11.34	9.21	10.21	9.77	11.65	11.39	10.93	11.13	13.59	8.49	7.88	5.51	9.21	9.54	10.77	9.74	6.4	6.74	8.59	8.91	9.8	7.87	8.66	10.62	7.17	8.44	8.59	4.37	7.56	9.57	10.54	14.16	14.3	12.83	10.55	11.18	9.31	6.85	7.25	7.18	7.57	6.16	7.51	10.1	11.03	12.53	8.67
BnaA01G0118300ZS	0.08	0.11	0.33	0.04	0.31	0	0.04	0	0.17	0	0.09	0.04	0	0.11	0	0	0.08	0.15	0.21	0.04	0	0.11	0	0	0	0.32	0.13	0	0.31	0.09	0.04	0	0.35	0	0	0	0	0.5	0.09	0.51	0.16	0.25	0.13	0.08	0	0	0.38	0	0.37
BnaA01G0118400ZS	0.7	0.71	1.36	0	0.5	0.6	0.33	0.42	0.32	0	0.17	0.07	1.22	0.73	1.04	0.43	0.24	0.21	0.33	0.16	0.08	0.07	0.22	0.06	1.45	3.49	1.99	1.24	1.44	1.35	0.52	0.42	0.77	0	0.18	0.09	0.88	0.97	0.69	0.82	0.46	0.4	0.25	0.4	0.38	0.09	0	0.19	1.62
BnaA01G0118500ZS	0	0	0	0	0	0.04	0	0	0	0	0	0	0	0.09	0	0	0	0	0	0	0	0	0	0	0	0	0	0	0	0	0	0	0	0	0	0	0.05	0.1	0	0	0	0	0	0	0	0	0	0	0
BnaA01G0118600ZS	0	0	0	0	0	0	0	0	0	0	0	0	0	0	0	0	0	0	0	0	0	0	0	0	0	0	0	0	0	0	0	0	0	0	0	0	0	0	0	0	0	0	0	0	0	0	0	0	0
BnaA01G0118700ZS	1.05	1.04	0.93	0.05	0.2	0.14	0.34	0.2	0.48	0.59	0.6	0.74	0.82	1.16	0.87	0.17	0.14	0.27	0.25	0.19	0.05	0.25	0.17	0.56	1.03	1.03	0.87	0.3	0.23	0.22	0.2	0.31	0.32	0.05	0.14	0.13	0.75	0.56	0.58	0.18	0.16	0.31	0.09	0.2	0.18	0.06	0.04	0.05	1.64
BnaA01G0118800ZS	0	0	0	0	0	0	0	0	0	0	0	0	0	0	0	0	0	0	0	0	0.52	0	0	0	0	0	0	0	0	0	0	0	0	0	0	0	0	0	0	0	0	0	0	0	0	0	0	0	0
BnaA01G0118900ZS	0	0	0	0	0	0	0	0	0	0	0	0	0	0	0	0	0	0	0	0	0	0	0	0	0	0	0	0	0	0	0	0	0	0	0	0	0	0	0	0	0	0	0	0	0	0	0	0	0
BnaA01G0119000ZS	0	0	0	0	0	0	0	0	0	0	0	0	0	0	0	0	0	0	0	0	0	0	0	0	0	0	0	0	0	0	0	0	0	0	0	0	0	0	0	0	0	0	0	0	0	0	0	0	0
BnaA01G0119100ZS	7.1	7.87	6.7	6.32	6.59	8.33	9.45	10.17	10.43	11.21	10.87	11.57	4.75	5.54	4.45	6.08	8.82	7.6	9.67	9.68	10.08	12.05	10.28	11.58	8.57	7.44	6.16	10.61	10.15	10.05	7.83	7.5	8.89	11.71	9.97	11	6.27	7.69	6.17	11.11	12.38	10.32	6.08	6.52	8.48	8.79	9.4	9.98	8.86
BnaA01G0119200ZS	14.86	15.2	15.27	10.84	9.84	12.65	6.59	5.52	6.79	7.24	7.26	7.23	11.88	10.14	8.52	7.97	10.1	10.17	8.33	7.59	8.72	12.48	9.34	10.89	11.94	12.22	13.31	11.47	8.53	11.26	3.87	5.1	4.43	4.73	5.31	5.07	11.21	11.51	10.75	7.23	7.76	6.49	3.73	4.27	4.58	6.5	7.93	5.85	12.47
BnaA01G0119300ZS	14.91	13.57	15.15	4.16	6.08	7.31	4.46	5.77	3.88	2.89	2.38	2.66	9.67	8.05	8.79	4.01	4.2	4.23	2.5	2.36	2.73	2.42	2.79	2.69	8.8	8.8	7.1	3.04	7.04	6.84	3.23	2.82	2.85	1.39	1.37	0.74	5.45	6.33	3.82	2.74	2.37	3.73	2.36	2.67	1.92	1.55	1.04	1.63	7.56
BnaA01G0119400ZS	2.09	1.51	2.03	5.57	5.77	6.33	0.09	0	0.07	0	0.02	0	2.61	2.38	1.95	2.59	3.35	3.62	0.44	0.11	0.61	0.1	0	0	3.31	3.74	4.06	3.13	2.77	2.85	0.23	0.43	0	0	0	0	2.71	3.73	3.05	2.91	1.27	1.95	0.14	0.34	0.14	0.09	0	0.17	1.66
BnaA01G0119500ZS	8.99	9.08	6.97	8.84	8.94	9.56	8.63	10.39	7.41	6.71	5.69	7.11	6.8	6.2	6.29	12.52	9.71	11.82	6.92	8.23	9.04	9.38	6.59	7.03	7.95	8.01	7.52	18.31	19.37	18.59	7.99	9.19	6.76	4.34	4.76	4.44	8.4	7.92	5.27	11.81	12.51	10.31	8.1	7.93	7.83	4.36	4.97	2.88	10.72
BnaA01G0119600ZS	0	0	0	0	0.09	0	0.61	0.56	0.8	0.6	0.51	0.14	0.17	0.07	0	0.15	0	0	0.31	0.44	0.28	0.14	0	0.34	0.16	0.08	0.08	3.62	4.25	2.58	1.59	0.77	0.69	1.53	1.8	1.49	0	0	0	0.32	0.44	0.41	0.13	0.01	0.66	0.2	0.17	0	0.18
BnaA01G0119700ZS	0.04	0.02	0.05	0.34	0.06	0.24	0	0.03	0.13	0.12	0.04	0.14	0.34	0.19	0.29	0.27	0.27	0.35	0.22	0.16	0.16	0.54	0.41	0.34	0.03	0.06	0.03	0.04	0.17	0.16	0.03	0	0.05	0.18	0.16	0.17	0.44	0.25	0.25	0.37	0.12	0.27	0.03	0.03	0.06	0.22	0.3	0.23	0.2
BnaA01G0119800ZS	0	0.06	0.09	0.16	0.15	0.19	0	0.09	0.02	0.03	0.04	0.08	0.2	0.15	0.08	0.34	0.33	0.4	0.15	0.11	0.18	0.05	0.05	0.12	0.02	0.05	0.04	0.17	0.1	0.08	0	0.04	0	0.04	0.05	0	0.22	0.15	0.14	0.2	0.43	0.29	0.09	0.07	0.02	0.12	0.06	0.04	0
BnaA01G0119900ZS	0.79	0.96	1.03	0	0	0	0.37	0.86	1.09	0	0.2	0.62	2.89	2.47	2.2	4.21	2.85	3.34	6.82	5.87	8.94	3.07	4	4.01	0.53	0.78	1.22	0.33	0	0.65	0	0.24	1.03	0.96	0.52	0.57	2.41	1.98	2.63	6.12	6.89	5.48	7.87	10.12	8.9	3.26	2.22	2.78	1.12
BnaA01G0120000ZS	0	0	0	0.09	0	0	1.18	0.62	0.87	1.35	1.1	0.2	0.1	0	0.1	0.52	0.78	0.46	2.03	1.97	1.82	2.64	2.88	5.04	0	0	0	0.48	0.41	0.23	0.12	0.92	0.56	0.49	0.36	0.83	0	0	0	0.69	0.19	0.12	1.67	0.73	2.38	2.41	2.47	2.56	0
BnaA01G0120100ZS	0	0	0	0	0	0.14	0	0	0	0	0	0	0	0	0	0	0	0.07	0	0	0	0	0	0	0	0	0	0	0	0	0	0	0	0.15	0	0	0	0	0	0	0	0	0	0	0	0	0	0	0
BnaA01G0120200ZS	0	0	0	0	0	0	0	0	0	0	0	0	0	0	0	0	0	0	0	0	0	0	0	0	0	0	0	0	0	0	0	0	0	0	0	0	0	0	0	0	0	0	0	0	0	0	0	0	0
BnaA01G0120300ZS	0	0.06	0.13	0	0	0	0	0.07	0	0	0	0.06	0.13	0.06	0	0	0	0	0	0	0	0.11	0	0.26	0.13	0.32	0	0	0	0	0	0.07	0.08	0	0.15	0	0	0.07	0	0	0	0	0	0	0	0	0.15	0.16	0
BnaA01G0120400ZS	1.83	1.69	1.41	1.16	0.8	1.32	0.31	0.84	0.52	0.78	0.42	0.75	1.34	1.38	1.3	0.78	1.02	1.02	0.43	0.65	0.68	0.71	0.53	0.63	2.17	2.13	1.78	0.7	0.88	0.94	1.09	1.79	0.87	0.94	1.08	1.26	2.28	2.01	1.8	0.77	0.51	0.71	0.83	1.08	0.72	1.19	1.02	0.82	1.45
BnaA01G0120500ZS	2004.75	1898.98	1943.99	973.76	1019.46	1015.42	736.42	731.18	742.12	444.18	445.12	437.56	2260.66	2145.5	2266.48	904.27	874.64	874.46	708.22	655.57	697.84	356.38	322.55	327.39	1706.16	1569.35	1546.31	466.98	462.39	461.95	498.5	518.46	521.36	229.2	251.2	249.01	1520.94	1495.43	1628.01	451.41	513.79	466.2	507.78	483.3	509.05	226.83	222.14	219.44	1786.95
BnaA01G0120600ZS	0	0	0	0	0	0	0	0	0	0	0	0	0	0	0	0	0	0	0	0	0	0	0	0	0	0	0	0	0	0	0	0	0	0	0	0	0	0	0	0	0	0	0	0	0	0	0	0	0
BnaA01G0120700ZS	0	0	0	0	0	0	0	0	0	0	0	0	0	0	0	0	0	0	0	0	0	0	0	0	0	0	0	0	0	0	0	0	0	0.15	0	0	0	0	0	0	0	0	0	0	0	0	0	0	0
BnaA01G0120800ZS	0	0	0	0	0	0	0	0	0	0	0	0	1.03	3.21	3.09	4.7	1.41	3.17	1.15	6.79	1.13	6.91	6.72	6.97	0	0	0	0	0	0	0	0	0	0	0	0	6.97	5.59	3.73	4.76	6.54	6.64	4.4	0.25	3.25	4.87	4.12	2.72	0
BnaA01G0120900ZS	4.15	3.76	5.12	2.82	5.16	3.07	1.43	1.31	0.78	0.78	1.79	1.14	3.93	4.9	4.01	1.27	2.34	1.81	1.2	2.01	1.76	0.38	0.5	0.71	1.82	1.97	2.05	1.38	0.48	1.22	0.07	0.17	1.11	0.59	2.26	1.08	0.7	1.46	0.96	0.25	0.63	0.51	0.61	0.56	0.63	2.89	2.24	2.31	4.67
BnaA01G0121000ZS	0	0	0	0	0	0	0	0	0.09	0	0	0	0.62	0.71	0.09	0.39	0.52	0.31	0.29	0.53	0.79	0.57	0.63	0.55	0	0	0	0	0	0	0	0	0	0	0	0	0.38	0	0.37	0.18	0.25	0.26	0.36	0.09	0.31	0.59	0.69	0.42	0
BnaA01G0121100ZS	0.44	0.64	0.37	1.28	2.87	2.73	1.13	1.69	1.92	2.1	0.28	1.72	2.94	4.1	2.59	3.05	4.04	4.38	2.26	3.27	2.21	1.4	1.39	0.68	0.21	0.02	0.67	2.93	1.63	4.1	1.32	0.72	1.01	0.54	0.47	0	2.36	3.05	3.07	4.27	4.64	3.67	2.57	3.09	2.12	5.35	5.8	6.04	1.24
BnaA01G0121200ZS	0	0	0	0	0	0	0	0	0	0	0	0	0	0	0	0	0	0	0	0	0	0	0	0	0	0	0	0	0	0	0	0	0	0	0	0	0	0	0	0	0	0	0	0	0	0	0	0	0
BnaA01G0121300ZS	0	0	0	0	0	0	0	0	0.03	0	0	0	0	0	0.09	0.17	0	0.08	0	0	0	0.03	0.24	0.1	0.13	0.12	0.17	0.36	0.31	0.08	0.71	0.21	0.31	0.18	0.11	0.59	0.1	0.08	0.14	0.17	0.19	0	0.32	0.96	0.29	0.45	1.6	1.1	0
BnaA01G0121400ZS	0	0	0	0	0	0	0	0	0	0	0	0	0	0	0	0	0	0	0	0	0	0	0	0	0	0	0	0	0	0	0	0	0	0	0	0	0	0	0	0.03	0	0	0	0	0	0	0	0	0.03
BnaA01G0121500ZS	0	0	0	0	0	0	0	0	0	0	0	0	0	0	0	0	0	0	0	0	0	0	0	0	0	0	0	0	0	0	0	0	0	0	0	0	0	0	0	0	0	0	0	0	0	0	0	0	0
BnaA01G0121600ZS	0.11	0.21	0.12	0.13	0.06	0.05	0	0.03	0.09	0	0.03	0.05	0.27	0.37	0.25	0	0.03	0	0.02	0	0.03	0	0	0	0.15	0.17	0.18	0.12	0.06	0	0	0.03	0	0	0	0.1	0.06	0.47	0.31	0.03	0.06	0.06	0	0	0.1	0	0	0	0.2
BnaA01G0121700ZS	24.21	21.41	21.37	14.15	16.8	15.36	7.8	7.96	8.63	8.43	8.11	6.71	14.64	16.08	14.49	8.7	9.22	9.52	6.51	4.66	5.02	4.88	3.52	4.1	12.99	13.3	14.36	9.49	7.43	8.3	3.72	4.34	3.95	1.84	2.36	1.81	4.06	6.95	9.17	2.22	3.43	3.82	2.53	3.29	3.6	0.37	1.45	1.25	3.22
BnaA01G0121800ZS	2.36	2.32	2.38	7.81	9.69	9.55	4.48	4.27	4.21	2.4	2.38	2.53	2.78	2.42	2.51	9.17	9.16	9.39	6.01	5.05	5.73	1.2	1.61	1.43	3.15	3.01	3.51	11.1	11.29	12.25	3.58	3.52	3.76	1.71	1.54	1.79	2.4	2.22	1.64	5.82	4.89	6.09	4.28	4.14	4.68	1.56	1.46	1.45	2.47
BnaA01G0121900ZS	0.49	0.65	0.25	0	0.45	0.53	0	0.4	0	0	0.14	0.17	2.95	2.12	2.08	3.53	1.8	1.57	1.33	1.91	0.79	1.1	1.48	2.35	0.38	0.22	0.46	0.38	0	0	0.07	0	0.36	0.33	0	0.95	1.61	1.54	1.15	1.96	2.23	1.21	1.28	1.26	0.06	0	0.69	0.5	0.4
BnaA01G0122000ZS	3.83	3.34	5.66	1.94	1.36	1.76	3.45	2.62	3.82	2.11	4.15	1.89	1.05	0.27	0.19	1.59	0	0.88	0.52	0	0	1.23	0.88	0.29	4.97	4.46	2.93	1.94	4.23	3.39	2.84	2.84	1.87	1.16	3.11	1.76	1.12	0	1.55	0.84	0	1.46	1.41	0.43	0.99	2.07	0.93	1.81	4.42
BnaA01G0122100ZS	0	0	0	0	0	0	0	0	0	0	0	0	0.07	0	0	0	0	0	0.24	0.07	0	0	0	0	0	0	0	0	0	0	0	0	0	0	0	0.09	0	0	0	0.07	0	0.07	0	0	0	0	0	0	0
BnaA01G0122200ZS	0	0	0	0	0.12	0	0	0.06	0	0	0	0	0	0.05	0	0	0	0	0	0	0	0	0	0	0	0	0	0.24	0.12	0.07	0	0	0	0	0	0	0	0	0	0	0	0	0	0	0	0	0	0	0
BnaA01G0122300ZS	3.95	3.24	2.82	2.43	3.71	2.76	3.96	3.65	3.99	3.92	4.87	5.1	2.91	2.53	3.52	2.53	1.86	1.64	1.56	2.29	1.57	1.98	3.02	1.9	6.53	4.93	4.7	9.77	8.21	9.14	8.05	6.66	8.71	5.45	5.65	7.15	4.23	4.34	4.51	3.86	4.29	4	3.92	3.1	3.39	8.34	7.08	6.75	2.93
BnaA01G0122400ZS	0.21	0.29	0.22	0	0.01	0.05	0	0.01	0.01	0	0	0	0.85	1.28	0.89	0.08	0.04	0.05	0.12	0.05	0.03	0	0.01	0	0.39	0.5	0.47	0.23	0.16	0.14	0.18	0.28	0.19	0.2	0.17	0.23	0.58	0.49	0.44	0.25	0.22	0.22	0.24	0.17	0.13	0.03	0.05	0.06	1.07
BnaA01G0122500ZS	0	0	0	0	0	0	0	0	0	0	0	0	0	0	0	0	0	0	0	0	0	0	0	0	0	0	0	0	0	0	0	0	0	0	0	0	0	0	0	0	0	0	0	0	0	0	0	0	0
BnaA01G0122600ZS	94.89	89.82	87.41	80.99	83.85	81.61	63.56	66.11	61.41	60.55	56.9	60.29	14.57	14.03	12.92	13.18	9.76	10.98	8.63	10.29	8.33	14.35	12.86	13.5	79.05	85.31	85.84	76.27	71.14	70.67	69.77	67.47	66.4	67.78	69.7	67.17	26.81	24.85	23.55	9.63	7.68	8.05	16.07	16.73	16.28	53.39	48.77	51.02	71.48
BnaA01G0122700ZS	0.7	0.3	0.84	0.3	0.06	0.41	0.48	0.44	0.85	0.47	0.78	0.58	2.51	1.73	2.08	1.88	1.31	2.73	2.15	3.66	3.89	3.5	2.7	3.18	0.87	1.27	0.74	1.58	0.81	0.2	0.63	1.62	0.9	0.97	1.03	0.8	5.05	4	4.88	1.9	1.4	3.03	7.8	7.79	7.72	26.74	24.66	22.28	1.43
BnaA01G0122800ZS	0	0	0	0	0	0	0	0	0	0	0	0	0	0	0	0	0	0	0	0	0	0	0	0	0	0	0	0	0	0	0	0	0	0	0	0	0.06	0	0	0	0	0	0	0	0	0	0	0	0
BnaA01G0122900ZS	4.06	5.56	5.89	5.26	4.39	4.51	4.68	5.9	4.79	4.36	4.21	5.25	7.08	6.92	4.8	6.52	7.55	5.67	5.42	5.57	5.63	6.37	6.73	8.27	5.72	5.3	5.52	6.33	5.39	5.67	5.11	5.39	3.96	2.86	2.93	4.13	7.98	5.8	7.18	6.71	6.53	5.19	4.74	4.17	4.34	6.5	5.57	4.76	3.83
BnaA01G0123000ZS	6.93	5.77	6.89	4.13	4.06	3.99	7.52	7.46	6.81	3.76	4.85	4.8	7.62	5.68	5.9	6.15	4.98	4.26	4.95	6.44	6.97	6.79	4.88	5.62	9.79	13.47	9.58	3.22	4.03	3.83	7.19	5.33	6.84	5.42	5.32	3.36	14.51	14.37	10.81	5.08	5.53	4.63	8.65	7.04	7.76	10.55	8.17	10.4	2.57
BnaA01G0123100ZS	1.6	1.74	1.51	2.74	2.86	2.11	3.38	2.56	2.68	2.07	2.03	2.47	1.24	1.28	0.25	2.82	3.31	2.64	3.11	3.05	4.91	2.16	2.54	1.72	1.81	1.1	1.27	5.3	5.6	4.85	3.36	4.44	3.16	2.63	3.07	2.12	0.43	1.05	1.54	7.74	9.14	8.86	5.91	4.9	5.6	2.25	2.82	2.48	2.48
BnaA01G0123200ZS	0.16	0.33	0.43	0.48	0.28	0.1	0.06	0.17	0	0	0	0.05	0.16	0.34	0	0.29	0.16	0.29	0.05	0	0.05	0	0	0	0.49	0.42	0.28	0.06	0.06	0.06	0	0	0	0	0	0	0.06	0	0.06	0.33	0.05	0.11	0	0	0.06	0	0	0	0.67
BnaA01G0123300ZS	0	0	0	0	0	0	0	0	0	0	0	0	0	0	0	0	0	0	0	0	0	2.63	0.87	0	0	0	0	2.17	0	0	0	0	0	3.46	0	0	0	0	0	0	0	0	0	0	0	0	0	0	0
BnaA01G0123400ZS	0	0	0	0.65	0	0	1.03	0	0	0	0.88	0.39	0	0	0	0.32	1.09	1.41	1.12	0	0	0	0.43	2.5	0	0.68	0	0	0	0.23	0.32	0	0.26	1.18	0	0.62	0	0.25	1.13	0	1.12	0.92	0.95	0.59	0	0	0.34	1.94	0
BnaA01G0123500ZS	0.31	0.19	0	0.37	0	1.14	0.34	0.59	0.77	0	0.61	1.25	1.03	0.02	1.09	0.85	0.91	0.71	0.47	0.25	0.37	1.19	1.15	0	2.07	0.84	0	0.9	0	0.11	0	0.67	0.89	0.79	1.21	1.55	0	1.17	0.69	0.26	0	1.07	0.62	0.47	1.13	0.6	2.13	1.08	1.12
BnaA01G0123600ZS	1.03	0.74	0.64	0.88	0.39	0.64	0.73	0.87	0.81	0.47	0.68	0.57	0.9	1.42	0.79	2	0.82	0	1.01	0.51	0.97	0.64	0.77	0.16	1.21	0.57	0.95	1.1	0.77	1.29	0.71	0.66	0.02	0.55	0.82	0.68	1.51	1.18	1.12	1.49	1.72	1	0.29	0.54	1.07	0.47	0.53	0.72	0.07
BnaA01G0123700ZS	0	0.11	0.04	0	0	0	0	0	0.04	0	0	0	0.04	0.04	0.05	0	0	0.04	0	0	0	0	0	0	0.04	0	0	0.09	0	0.09	0	0	0	0	0.09	0.05	0.09	0	0	0	0	0	0.04	0.04	0	0	0	0	0
BnaA01G0123800ZS	7.27	5.4	7.56	8.7	10.19	6.71	8.3	7.28	5.5	9.86	7.41	8.05	4.58	5.04	5.25	9.13	7.81	6.07	4.56	5.54	5.53	6.37	4.57	4.7	8.33	7.86	9.6	6.39	6.63	5.16	3.61	4.68	4.87	11.52	8.85	15.49	7.51	8.28	5.11	6.64	6.94	6.58	4.25	4.07	4.63	8.44	6.44	8.56	6.36
BnaA01G0123900ZS	11.16	11.6	11.01	7.67	8.71	9.08	10.57	12.7	9.81	10.26	10.75	12.45	8.8	9.52	7.96	9.42	10.52	9.84	8.88	9.17	10.06	11.06	8.04	11	9.72	8.03	8.74	9.44	10.41	10.47	9.42	8.09	7.58	8.57	9.3	6.41	9.86	10.26	10.38	9.78	11.72	9.99	8.31	7.17	9.57	7.37	7.46	6.47	8.87
BnaA01G0124000ZS	0	0	0	0	0	0	0	0	0	0	0	0	0	0	0	0	0	0	0	0	0	0	0	0	0	0	0.64	0	0	0	0	0	0.75	0	0	0	0	0	0	0	0	0	0	0	0	0	0	0	0
BnaA01G0124100ZS	0	0	0.09	0	0	0	0	0	0	0	0	0	0	0	0	0	0	0	0	0	0	0	0	0	0	0	0	0	0	0	0	0	0	0	0	0	0	0	0	0	0	0	0	0	0	0	0	0	0
BnaA01G0124200ZS	0	0	0	0	0	0	0	0	0	0	0	0	0	0	0	0	0	0	0	0	0	0	0	0	0	0	0	0	0	0	0	0	0	0	0	0	0	0	0	0	0	0	0	0	0	0	0	0	0
BnaA01G0124300ZS	0	0	0	0	0	0	0	0	0	0	0.01	0	0	0	0	0	0	0	0.01	0	0	0	0.01	0	0	0	0	0	0	0	0.01	0	0	0.01	0	0.01	0	0	0	0	0	0	0	0	0	0	0	0	0
BnaA01G0124400ZS	0	0	0	0	0	0	0	0	0	0	0	0	0	0	0	0	0	0	0	0	0	0	0	0	0	0	0	0	0	0	0	0	0	0	0	0	0	0.04	0	0	0	0	0	0	0	0	0	0	0
BnaA01G0124500ZS	0	0	0	0	0	0	0	0	0	0	0	0	0	0	0	0	0	0	0	0	0	0	0	0	0	0	0	0	0	0	0	0	0	0	0	0	0	0	0	0	0	0	0	0	0	0	0	0	0
BnaA01G0124600ZS	0	0	0	0	0	0	0	0	0	0	0	0	0	0	0	0	0	0	0	0	0	0	0	0	0	0	0	0	0	0	0.11	0	0	0	0	0.22	0	0	0	0.1	0	0	0.1	0	0	0	0	0	0
BnaA01G0124700ZS	27.7	26.98	27.6	17.9	16.84	19.02	12.21	11.17	13.39	6.86	7.86	6.36	28.42	32.24	34.49	21.06	22.71	19.32	17.67	16.35	14.85	10.11	10.99	9.37	23.1	18.63	18.83	20.7	20.61	16.77	13.37	13.35	13.39	5.09	6.5	5.45	24.81	25.03	26.66	23.27	34.35	27.13	11.71	11.09	11.77	17.28	18.69	21.08	23.67
BnaA01G0124800ZS	20.65	20.18	18.75	12.65	13.64	13.13	9.77	9.59	9.16	3.74	3.49	3.92	22.68	23.67	22.58	17.09	16.16	17.1	13.73	13.02	14.26	5.19	5.11	4.39	14.52	15.07	15.07	12.85	11.9	11.75	7.28	8.54	8.09	2.85	3.09	2.71	16.38	16.69	17.7	13.06	14.27	12.86	9.75	9.34	10	3.17	3.18	3.11	16.97
BnaA01G0124900ZS	0.64	0.7	0.82	0.38	0.56	0.51	0.63	0.42	0.59	0.77	0.51	0.89	0.64	0.85	0.69	0.79	0.63	0.6	0.64	0.55	0.61	0.59	0.62	0.63	0.46	0.37	0.62	0.98	0.65	0.9	0.25	0.41	0.2	0.32	0.32	0.42	0.46	0.42	0.55	0.7	0.56	0.53	0.31	0.29	0.36	0.23	0.28	0.37	0.76
BnaA01G0125000ZS	1.61	0.42	1.22	1.71	1.55	0.82	3.37	2.64	2.71	0.94	0.96	0.29	3.38	3.19	3.37	2.94	2.41	3.48	5.38	3.68	3.34	4.82	3.63	4.94	7.97	7.61	7.74	6.93	5.34	5.52	18.54	21.71	20.89	23.96	22.42	25.55	2.91	4.46	5.64	7.46	8.09	6.72	18.67	17.72	21.85	6.66	7.71	9.39	1.96
BnaA01G0125100ZS	16.09	14.72	16.29	8.35	9.47	9.58	8.23	9.69	9.9	12.97	11.33	11.55	19.56	25.94	24.36	9.33	9.37	9.11	8.13	8.96	8	9.27	9.8	10.21	17.7	16.37	17.19	11.15	12.89	11.52	10.55	9.59	10.77	11.36	13.05	12.56	13.38	14.15	14.26	8.16	10.05	10.03	7.56	7.67	8.03	9.36	7.94	7.67	24.72
BnaA01G0125200ZS	0	0.07	0	0	0	0	0	0	0	0	0.04	0	0	0	0	0	0	0	0	0	0	0	0	0	0.17	0	0	0	0	0	0	0	0	0	0	0	0	0	0	0	0	0	0	0	0	0	0	0	0
BnaA01G0125300ZS	0.14	0.13	0.28	0	0	0	0.58	0.3	0.36	0	0.07	0.06	0.22	0.19	0.15	0	0.21	0.19	0.24	0.29	0.21	0.2	0	0	1.85	2.08	2.2	1.73	0.93	0.75	0.69	1.42	0.69	0.82	0.25	0.94	2.5	3.57	3.35	1.12	1.14	0.28	1.09	0.66	1.03	0.89	0.97	1.07	0.08
BnaA01G0125400ZS	0	0	0	0	0	0	0	0	0	0	0	0	0	0	0	0	0	0	0	0	0	0	0	0	0	0	0	0	0	0	0	0	0	0	0	0	0	0	0	0	0	0	0	0	0	0	0	0	0
BnaA01G0125500ZS	2.61	2.03	1.76	0.87	0.51	0.67	1.59	1.2	1.03	1.16	1.51	0.84	4.6	4.23	3.55	0.91	0.9	0.87	1.21	1.48	0.93	1.48	1.27	1.64	1.74	1.15	1.74	1	1.01	1.44	1.21	1.19	1.66	1.44	1.45	2.08	2.03	1.87	1.82	0.56	0.78	0.48	1.04	0.81	0.49	1.09	1.67	1.33	1.5
BnaA01G0125600ZS	0	0	0	0	0	0	0	0.05	0	0.29	0.35	0.34	0	0	0	0	0	0	0	0	0	0.2	0.16	0.14	0	0	0	0	0	0	0	0.09	0.16	0.04	0	0	0	0	0	0	0	0	0	0	0	0.25	0.06	0	0
BnaA01G0125700ZS	5.98	6.13	5.71	1.76	2.59	2.02	4.43	3.29	4.3	1.89	1.52	1.71	7.87	7.72	8.33	1.01	0.92	0.65	0.85	0.76	1.07	1.37	1.65	1.16	10.82	9.36	10.19	1.86	1.52	1.66	7.92	7.32	7.48	6.42	6.13	5.79	10.32	10.22	11.92	1.39	1.7	1.2	2.83	2.47	2.84	14.07	12.39	13.43	9.71
BnaA01G0125800ZS	1.64	1.34	1.36	1.26	1.47	1.45	0.88	0.36	1.38	0.55	1.15	0.88	1.77	1.67	2.42	1.43	0.83	1.87	0.5	0.63	1.2	0.95	1.44	0.58	1.57	1.62	1.35	1.25	0.68	0.81	1.03	0.76	0.92	1.3	1.17	1.12	1.8	0.62	1.02	0.95	0.54	1.37	0.6	0.43	0.16	1.29	0.62	1.31	2.6
BnaA01G0125900ZS	0.4	0.3	0.44	0.08	0.08	0.11	1.6	1.45	1.49	1.88	2.51	2.03	0.4	0.49	0.51	0.19	0.16	0.15	1.92	1.79	1.84	6.43	5.83	6.8	1.09	0.53	0.81	0.57	0.51	0.47	1.04	1.28	0.9	2.26	2.24	2.44	0.77	0.87	0.69	0.48	0.49	0.34	0.55	0.74	0.48	3.44	4.3	3.79	0.35
BnaA01G0126000ZS	0	0	0	0	0	0	0	0	0	0	0	0	0	0	0	0	0	0	0	0	0	0	0	0	0	0	0	0	0	0	0	0	0	0	0	0	0	0	0	0	0	0	0	0	0	0	0	0	0
BnaA01G0126100ZS	0.56	0.73	0.76	0	0	0.04	0.01	0	0	0.01	0	0	1.11	0.52	0.75	0.07	0.04	0.03	0	0	0.01	0	0	0	0.19	0.15	0.03	0.03	0	0.03	0.01	0.01	0.02	0.01	0.03	0	0.54	0.33	0.37	0	0	0	0.03	0.01	0.02	0.01	0	0	2.28
BnaA01G0126200ZS	2.29	1.64	2.45	1.29	0.91	0.44	1.66	1.2	0.99	0.41	1.04	0.87	0.67	1.95	1.19	0.39	1.16	0.22	0.61	0.45	0.13	1.49	0.48	1.38	1.39	1.27	1.32	1.07	1.13	0.34	0.09	0	0.2	0	0.92	0.45	1.09	0.7	1.44	1.63	0.46	1.64	0.94	0.47	1.18	0.59	0.51	0.43	1.3
BnaA01G0126300ZS	0	0	0	0.34	0	0.36	0	0	0	0	0	0	0	0	0	1.7	1.61	2.13	1.37	1.49	0.92	0	0	0	0	0	0	0	0	0	0.02	0	0.01	0	0	0	0	0	0	1.1	0.14	0.11	0.6	1.26	1.58	0	0.38	0.68	0
BnaA01G0126400ZS	10.41	9.52	9.96	17.72	18.96	19.83	29.79	28.19	31.67	24.18	21.94	22.16	21.01	19.38	22.77	26.83	25.6	25.35	34.48	30.57	32.25	30.94	30.09	31.44	13.67	12.12	13.24	14.32	14.67	14.6	20.4	18.19	19.61	12.94	13.87	16.17	15.46	13.69	16.64	14.64	16.93	16.05	20.52	22.33	22.03	14.87	14.45	14.21	9.48
BnaA01G0126500ZS	0.06	0.06	0.36	0.13	0	0.38	0	0.11	0	0.53	0.89	0.03	0	0.11	0	0.18	0	0.39	0.28	0.37	0.18	0	0.42	0.5	0.12	0	0	0.31	0.1	1	0.74	0	1.26	0.08	0.26	0	0.11	0.33	0	1.05	0.64	0.73	0	0.84	0.48	1.34	1.63	0.77	0
BnaA01G0126600ZS	1.77	1.62	1.43	1.34	1.04	0.97	1.07	0.9	1.06	1.57	1.39	1.21	1.61	1.34	1.14	1.17	1.39	0.94	0.99	0.83	0.97	1.52	0.96	1.66	1.12	1.09	1.43	1.09	0.85	1.49	0.84	1.03	0.82	1.66	0.88	0.85	1.26	1.52	1.36	1.43	1.07	1.45	0.6	1.04	0.77	1.34	0.93	1.11	1.74
BnaA01G0126700ZS	0.22	0.33	0.34	0.71	0.84	1.12	0.2	0.31	0.37	0.17	0.42	0.38	0.95	0.37	0.52	0.66	0.71	0.76	0.23	0.15	0.08	0.03	0.1	0	0.75	0.38	0.35	0.81	0.48	0.67	0.52	0.31	1.14	1.07	1.09	0.86	0.41	0.15	0.2	0.39	0.93	0.44	0.42	0.26	0.44	0.33	0.7	0.45	0.42
BnaA01G0126800ZS	0.23	0.22	0	0.52	0.44	0.6	0.34	0.54	0.15	0.02	0.05	0.15	0.08	0.13	0.22	0.15	0.14	0.26	0.12	0.17	0.17	0.11	0.24	0.15	0.15	0.07	0.25	0.05	0.15	0	0.19	0.43	0.45	0.07	0.11	0.05	0.03	0	0.02	0	0.05	0.12	0.13	0.17	0.03	0.19	0.12	0.24	0
BnaA01G0126900ZS	0.86	0.62	0.63	2.29	3.32	3.1	3	3.2	3.48	0.67	0.76	0.35	1.93	1.8	2.13	2.72	3.16	2.35	4.33	4.22	3.85	0.6	0.7	0.19	0.68	0.64	0.36	0.59	0.73	0.86	1.89	1.38	1.52	0.32	0.17	0.39	0.49	0.71	0.68	0.57	0.66	0.79	1.81	2	1.28	0.31	0.54	0.32	0.45
BnaA01G0127000ZS	0	0	0	0.28	0.11	0.29	0.07	0.04	0	0	0	0	0	0	0	0.31	0.35	0.19	0.06	0	0.04	0.03	0.06	0.11	0	0	0.04	0	0	0	0.07	0.04	0	0.17	0.2	0.08	0	0	0	0	0.03	0	0	0.03	0.04	0.04	0	0.08	0
BnaA01G0127100ZS	1.47	1.33	1.32	2.05	1.53	1.36	1.19	1.01	0.67	1.11	0.88	0.89	0.68	1.04	0.72	1.06	1.34	2	1.01	0.43	0.49	0.74	0.66	1.14	1.16	0.76	0.88	1.5	1.15	2.04	0.59	0.88	0.58	0.74	0.27	0.8	1.26	1.47	1.17	1.17	1.12	1.93	1.18	0.79	0.58	0.2	0.55	0.51	1.77
BnaA01G0127200ZS	0	0	0	0	0	0.03	0	0	0	0	0	0	0	0	0	0.02	0	0.05	0	0	0	0	0	0	0	0	0	0	0	0.1	0	0	0	0.03	0	0	0	0.03	0.03	0.08	0	0	0	0	0	0	0	0	0.03
BnaA01G0127300ZS	12.66	11.36	10.63	26.93	26.01	26.66	38.71	37.97	39.3	33.24	30.34	33.98	12.91	12.67	13.71	25.42	22.79	25.56	42.41	39.98	39.11	25.6	29.48	34.8	9.15	11.54	11.57	12.87	12.47	14.04	33.85	31.51	32.42	10.94	11.26	11.32	14.08	12.75	14.26	14.04	13.88	14.26	29.56	32.29	32.34	11.29	9.59	11.41	8.18
BnaA01G0127400ZS	0	0	0	0	0	0	0	0	0	0.08	0	0	0	0	0	0	0	0	0	0	0	0	0	0	0	0	0	0	0	0	0	0	0	0	0	0	0	0	0	0	0	0	0	0.09	0	0	0	0	0
BnaA01G0127500ZS	0	0	0	0	0	0	0	0	0	0	0	0	0	0	0	0	0	0	0	0	0	0	0	0	0	0	0	0	0	0	0	0	0	0	0	0	0	0	0	0	0	0	0	0	0	0	0	0	0
BnaA01G0127600ZS	2.23	2.48	2.58	1.1	0.47	1.13	1.09	1.5	0.83	0.92	1.1	0.66	2.99	3.12	3.19	1.51	2.42	1.25	1.76	1.8	1.74	0.96	1.23	1.15	2.58	1.38	2.17	2.16	2.83	1.59	1.82	1.82	1.52	1.08	1.26	1.25	1.39	1.83	1.82	2	2.63	1.51	0.95	1.73	1.1	1.62	0.57	1.19	2.75
BnaA01G0127700ZS	1.59	1.39	1.5	2.37	1.88	2.09	3.16	3.11	2.91	2.62	3	3.45	1.97	2.21	2.33	3.3	3.19	3.53	3.04	3.43	3.47	3.4	3.26	3.31	1.76	1.72	1.66	1.43	1.6	1.03	4.12	5.03	3.48	2.57	2.91	2.9	3.04	3.09	2.47	1.29	1.67	1.4	3.03	3.23	3.22	3.05	3.54	3.51	0.61
BnaA01G0127800ZS	0.03	0.01	0	0.01	0	0.06	0	0.03	0	0	0	0	0.02	0.03	0	0	0	0	0.01	0.02	0	0	0	0	0.13	0.15	0.08	0.02	0.08	0.14	0.04	0.03	0.02	0	0	0.02	0.02	0	0.03	0	0.02	0	0	0	0	0.02	0.02	0	0
BnaA01G0127900ZS	0.17	0.21	0.48	0.16	0.13	0.25	0.25	0.13	0.06	0.14	0.28	0.05	0.52	1.33	0.84	0.54	0.27	0.54	0.15	0.27	0.36	0.21	0.19	0	0.09	0.15	0.19	0.16	0.51	0.17	0.03	0.06	0	0	0.07	0.1	0.23	0.15	0.26	0.07	0.26	0.06	0.09	0.15	0.18	0.07	0	0.11	0.51
BnaA01G0128000ZS	0	0	0	0	0	0	0.02	0	0.02	0.05	0.04	0.02	0	0	0	0	0	0	0	0.06	0.02	0.1	0.05	0.11	0	0	0.02	0	0.06	0.02	0.06	0.02	0.07	0	0.04	0	0	0	0	0.04	0	0.02	0	0.04	0	0.04	0.05	0.1	0
BnaA01G0128100ZS	0	0	0	0	0	0	0	0	0	0	0	0	0	0	0	0	0	0	0	0	0	0	0	0	0	0	0	0	0	0	0	0	0	0	0	0	0	0	0	0	0	0	0	0	0	0	0	0	0
BnaA01G0128200ZS	5.69	5.17	5.74	0.6	0.11	0.05	0	0	0	0	0	0	6.67	5.46	5.45	1.02	0.52	0.37	0	0	0	0	0	0	5.69	7.46	5.17	0	0	0.06	0.06	0.05	0.19	0	0	0	3.06	4.3	5.3	0	0	0.05	0.05	0	0	0	0	0	2.28
BnaA01G0128300ZS	2.43	2.25	2.59	0.82	0.74	0.9	0.54	0.68	0.92	1.09	1.15	1.32	3.34	2.73	2.79	1.15	0.82	1.02	0.85	0.75	0.87	0.97	0.87	0.56	3.18	2.91	3.09	0.98	0.69	1.14	0.38	0.19	0.24	0.16	0.08	0.06	2.64	2.88	3.09	1.11	0.97	1.13	0.42	0.51	0.36	0.35	0.38	0.11	2.11
BnaA01G0128400ZS	0.34	0.28	0	0	0	0	0	0	0.03	0	0.07	0	0	0	0	0	0	0	0.06	0	0	0	0	0	0	0.07	0	0.07	0	0	0.08	0.04	0.05	0.06	0	0.26	0	0	0	0	0	0	0	0	0	0	0	0	0
BnaA01G0128500ZS	0	0	0	0	0	0	0	0	0	0	0	0	0	0	0	0	0	0	0	0	0	0	0	0	0	0	0	0	0	0	0	0	0	0	0	0	0	0	0	0	0	0	0	0	0	0	0	0	0
BnaA01G0128600ZS	0	0	0	0	0	0	0	0	0	0	0	0	0	0	0	0	0	0	0	0	0	0	0	0	0	0	0	0	0	0	0	0	0	0	0	0	0	0	0	0	0	0	0	0	0	0	0	0	0
BnaA01G0128700ZS	0.04	0.05	0	0	0	0	0	0	0	0	0	0	0	0.04	0.09	0	0	0	0	0	0	0	0	0	0	0	0	0.02	0.04	0	0	0	0	0.02	0	0	0	0.06	0.07	0.02	0	0	0	0	0	0.11	0	0.02	0
BnaA01G0128800ZS	0.07	0.27	0	0	0	0	0	0	0	0.72	0.45	0	0.15	0.23	0.12	0	1.34	0.39	2.18	0	1.66	0	0	0	0.29	0.08	0	1.66	0	0	0	0	0	0	0	0	0.03	0.11	0.14	0.58	0	0	0	0.07	0	0	0	1.11	0
BnaA01G0128900ZS	0	0	0	0	0	0	0	0	0	0	0	0	0	0	0	0	0	0	0	0	0	0	0	0	0	0	0	0	0	0	0	0	0	0	0	0	0	0	0	0	0	0	0	0	0	0	0	0	0
BnaA01G0129000ZS	0	0	0	0.05	0.07	0.35	0.18	0.14	0.19	0.06	0.16	0.23	0	0	0	0.25	0.59	0.15	0.38	0.46	0	0	0.49	0.32	0	0	0	0.1	0.23	0.24	0.08	0.29	0.59	0	0.06	0.24	0	0	0	0.45	0.56	0.39	0.24	0	0.49	0.26	0.2	0.42	0
BnaA01G0129100ZS	0	0.02	0	0.09	0.05	0.07	0.05	0	0	0	0.03	0.02	0.03	0	0	0.23	0.13	0.18	0.04	0.03	0.03	0.04	0.02	0	0	0	0	0.03	0.05	0.06	0	0	0	0	0	0.08	0	0	0	0.1	0	0.05	0	0.03	0.06	0	0	0	0
BnaA01G0129200ZS	0.43	0.37	0.31	0	0	0	0	0	0	0	0	0	0.11	0.16	0	0	0	0	0	0	0	0	0	0.09	0	0.02	0.05	0	0	0	0	0	0	0.09	0	0.05	0	0	0.05	0	0	0	0	0	0	0	0.15	0.03	0.17
BnaA01G0129300ZS	0	0	0	0	0	0	0	0	0	0	0	0	0	0	0	0	0.1	0	0	0	0	0	0	0	0	0.19	0	0	0	0	0	0	0	0	0	0	0	0	0	0	0	0	0	0	0	0	0	0	0
BnaA01G0129400ZS	0	0	0	0	0	0	0	0	0	0	0	0	0	0	0	0	0	0	0	0	0	0	0	0	0	0	0	0	0	0	0	0	0	0	0	0	0	0	0	0	0	0	0	0	0	0	0	0	0
BnaA01G0129500ZS	17.78	15.68	16.13	1.29	0.88	1.26	0.83	0.6	0.37	0.52	0.58	0.54	27.02	26.71	26.66	7.75	6.9	7.68	1.17	0.89	0.63	0.88	1.03	1.35	15.03	13.38	12.85	1.67	2.12	1.65	1.13	0.93	1.23	6	7.11	7.44	16.81	16.46	17.59	5.6	6.06	6.28	1.54	1.51	1.07	12.32	11.08	10.42	26.89
BnaA01G0129600ZS	0	0	0	0.16	0	0	0.11	0	0.04	0	0	0	0	0	0.12	0	0	0	0	0	0	0	0	0	0	0	0	0	0	0	0	0.07	0	0.07	0	0.08	0	0	0	0	0	0	0	0	0	0	0	0	0
BnaA01G0129700ZS	0	0	0	0.06	0	0	0	0	0	0.06	0	0.05	0	0	0	0	0	0	0	0	0	0	0	0	0	0	0	0	0	0	0	0.13	0.08	0	0	0	0	0	0	0	0	0	0	0	0	0	0	0	0
BnaA01G0129800ZS	0.38	0.13	0.58	0.69	1.45	0.37	1.31	0.71	0.89	1.14	1.7	1.27	5.64	4.97	6.72	7.4	11.57	14.52	7.35	5.92	7.99	14.25	9.79	17.5	0.58	0.74	1.42	0.72	0.17	0.25	0.52	0.62	0.72	2.73	2.11	1.28	5.93	7.8	4.81	6.14	8.9	5.28	5.07	6.95	7.75	10.25	10.13	10.88	0.72
BnaA01G0129900ZS	0	0	0	0	0	0	0	0	0	0	0	0	0	0	0	0	0	0	0	0	0	0	0	0	0	0	0	0	0	0	0	0	0	0	0	0	0	0	0	0	0	0	0	0	0	0	0	0	0
BnaA01G0130000ZS	0	0	0	0	0	0	0	0	0	0	0	0	0	0	0	0	0	0	0	0	0	0	0	0	0	0	0	0	0	0	0	0	0	0	0	0	0	0	0	0	0	0	0	0	0	0	0	0	0
BnaA01G0130100ZS	0.29	0.54	0.83	0.2	0.48	0.14	0.08	0.4	0	0.07	0.39	0	0.46	0.07	0.41	0	0.61	0.3	0.13	0.31	0.15	0.2	0.14	0.06	0.46	0.59	0.08	0.24	0	0.09	0.57	0.16	0.55	0.75	0	0.25	0	0.15	0.33	0.39	0.07	0.08	0.08	0.15	0.09	0.34	0	0.09	0.26
BnaA01G0130200ZS	0.02	0	0	0.02	0.05	0.05	0	0	0	0	0	0	0	0	0	0	0	0.04	0.17	0	0.03	0	0	0	0	0.02	0	0.05	0.03	0	0	0	0	0.02	0	0	0.16	0.05	0	0.08	0.05	0.12	0.03	0.07	0	0	0	0	0
BnaA01G0130300ZS	3.29	1.89	2.97	32.79	31.29	30.8	4.65	3.97	3.65	0.73	0.59	0.16	21.26	19.42	21.36	51.51	53.91	56.78	9.87	9.38	10.36	1.7	2.02	2.89	28.45	28.7	28.58	15.97	13.77	14.43	2.08	2.96	2.56	0.84	0.81	0.64	35.39	37.74	33.56	22.75	19.28	19.65	7.08	7.11	6.62	2.36	1.8	2.47	0.27
BnaA01G0130400ZS	0.59	0.36	0.43	0.13	0.15	0.19	0.03	0.03	0.06	0.03	0	0.02	1.37	1.25	1.21	0.71	0.78	0.73	0.05	0.14	0.12	0.1	0	0.05	0.32	0.67	0.48	0.03	0	0.19	0.03	0	0	0.08	0.06	0	1.55	1.16	1.07	0.17	0	0.26	0.03	0.06	0	0.05	0	0.07	0.46
BnaA01G0130500ZS	0.12	0	0	0	0	0	0	0	0	0	0.13	0	0.29	0.09	0	0.13	0	0.42	0.1	0	0	0	0	0.35	0	0.19	0	0	0.09	0	0	0	0	0.02	0	0.02	0	0	0.06	0.08	0	0	0	0	0	0	0.02	0.19	0.15
BnaA01G0130600ZS	2.81	2.54	2.63	5.77	5.14	5.8	6.33	6.44	6.1	3.76	2.92	2.67	2.29	1.46	0.75	5.07	5.46	5.22	4.7	4.66	3.59	2.58	2.98	4.06	2.35	2.65	1.86	2.65	4.23	4.19	4.73	5.79	7.02	2.63	3.54	4.34	1.55	1.56	0.57	3.91	3.87	3.19	4.38	5.35	5.5	2.84	1	1.52	0.79
BnaA01G0130700ZS	0.04	0.08	0	0.01	0.05	0.01	0.01	0	0	0.1	0.08	0.03	0.15	0.03	0.1	0.15	0.12	0.2	0.14	0.21	0.12	0.16	0.25	0.27	0.02	0.03	0.02	0.12	0.1	0.13	0.12	0.06	0.1	0.14	0.19	0.09	0.03	0.01	0.01	0.05	0.11	0.08	0.04	0.02	0.03	1.04	1.32	1.4	0.04
BnaA01G0130800ZS	0	0	0	0	0	0	0	0	0	0.17	0	0	0	0.13	0	0.11	0.06	0	0	0	0.06	0	0	0.35	0	0	0.26	0.28	0.22	0.23	0.09	0.07	0	0	0	0.25	0	0	0.16	0.07	0.24	0.18	0.07	0	0.22	0	0.09	0.16	0
BnaA01G0130900ZS	0	0	0	0	0	0	0	0	0.02	0	0	0	0	0	0	0	0	0	0	0	0	0	0	0.08	0	0	0	0	0	0	0	0	0	0	0	0	0	0	0	0	0	0	0	0	0	0	0	0	0
BnaA01G0131000ZS	0	0	0	0	0	0	0	0	0	0	0	0	3.52	3.43	3.7	3.48	3.45	2.96	0.76	0.4	0.42	0	0	0	0.2	0.8	1.07	0.21	0.22	0	0	0	0	0	0	0	1.95	2.77	3.12	1.79	1.73	1.19	0	0	0	0	0	0	1.85
BnaA01G0131100ZS	2.2	2.16	1.97	6	5.55	6.02	4.76	5.25	5.27	3.32	3.63	3.17	3.03	3.02	3.32	8.05	8.74	7.35	6.1	5.98	6.27	5.59	5	5.46	1.11	3.75	3.42	5.73	6.31	6.57	4.64	3.75	4.11	2.31	2.56	2.55	3.11	2.91	3.64	6.72	7.04	6.37	4.32	4.24	4.25	1.49	1.86	1.93	2.2
BnaA01G0131200ZS	0	0	0	0	0	0	0	0	0	0	0	0	0	0	0	0	0	0	0	0	0	0	0	0	0	0	0	0	0	0	0	0	0	0	0	0.01	0	0	0	0	0	0	0	0	0	0	0	0	0
BnaA01G0131300ZS	0	0	0	0	0	0	0	0	0	0	0	0	0.12	0	0	0	0	0	0	0	0	0	0	0	0.11	0	0	0	0	0	0	0	0	0	0	0	0	0	0	0	0	0	0	0	0	0	0	0	0
BnaA01G0131400ZS	8.33	12.51	6.36	20.69	17.42	20.93	11	8.98	6.29	1.58	1.07	0.6	3.89	3.15	3.75	21.26	33.56	27.01	7.91	12.02	10.37	0.3	0.02	0.28	7.58	2.01	5.31	7.89	9.48	12.84	3.36	3.25	4.15	1.04	0	0.38	8.06	3.75	1.11	13.09	13.92	11.7	9.2	5.56	9.72	0.79	0.08	0.42	5.15
BnaA01G0131500ZS	0.05	0	0	0	0	0	0.05	0	0	0	0	0	0.06	0.04	0	0	0	0	0	0.05	0.02	0	0.04	0	0	0.04	0	0	0	0	0.16	0	0	0	0	0.11	0.05	0	0.23	0	0	0	0	0	0	0	0.03	0	0
BnaA01G0131600ZS	0	0	0	0	0	0	0	0	0	0	0	0	0	0	0	0	0	0	0	0	0	0	0	0	0	0	0	0	0	0	0	0	0	0	0	0	0	0	0	0	0	0	0	0	0	0	0	0	0
BnaA01G0131700ZS	0	0	0	0	0	0	0	0	0	0	0	0	0	0.08	0.22	0	0.03	0	0	0	0	0	0	0	0	0	0	0	0	0	0.02	0	0	0	0	0	0	0	0	0	0	0	0	0	0	0	0	0	0
BnaA01G0131800ZS	0.48	0.13	0.33	1	0.98	0.63	0.18	0.34	0.5	0.14	0.18	0.31	0.42	0.25	0.32	1.22	1.41	1.2	0.29	0.52	0.3	0.29	0.13	0.27	1.86	2.47	1.41	1.51	1.88	1.86	0.58	0.45	0.66	0.12	0	0.1	1.22	0.84	1.03	2.31	2.2	1.67	0.97	0.65	0.52	0.13	0.27	0.25	0.56
BnaA01G0131900ZS	1.6	1.98	1.76	2.45	2.73	2.46	1.08	1.24	1.15	3.32	3	2.85	2.1	2.14	2.1	1.58	1.69	1.89	1.3	1.05	1.18	2.44	3.22	3.01	1.66	2.16	2.08	0.92	1.14	1.05	1.27	1.31	1	4.24	4.38	4.2	2.03	1.91	2.01	1.25	1.18	1.21	0.69	0.58	0.62	3.25	3.14	3.29	2.29
BnaA01G0132000ZS	0	0	0	0	0	0	0	0	0	0	0	0	0	0	0	0	0	0	0	0	0	0	0	0	0	0	0	0	0	0	0	0	0	0.04	0	0	0	0	0	0	0	0	0	0	0	0	0	0	0
BnaA01G0132100ZS	0.23	0.36	0.35	0.33	0.12	0.28	0	0.03	0.11	0	0	0	0.57	0.34	0.47	0.21	0.57	0.52	0.2	0.08	0.05	0.05	0.05	0.02	0.38	0.39	0.17	0.85	0.97	1.12	0	0.06	0	0	0	0	0.44	0.41	0.4	1.28	1.15	1.14	0.03	0	0.03	0	0.03	0.07	0.24
BnaA01G0132200ZS	0	0	0	0	0	0	0	0	0	0	0	0	0	0	0	0	0	0	0	0	0	0	0	0	0	0	0	0	0	0	0	0	0	0	0	0	0	0	0	0	0	0	0	0	0	0	0	0	0
BnaA01G0132300ZS	1.52	1.68	0.92	0.26	0.21	0.86	1.81	3.34	1.88	1.12	1.57	1.78	1.46	0.96	1.76	0	0.15	0.88	0.97	1.01	1.47	0.89	0.64	0.94	0.43	0.85	1.49	0.88	1.41	1.04	1.96	3.96	2.54	0.55	0.25	0.51	0.6	0.22	0.47	0.81	0.32	0.44	0.95	1.51	1.04	0.91	1.3	0.92	0.16
BnaA01G0132400ZS	5	4.91	4.55	4.17	3.77	4.09	2.41	2.61	3.02	6.2	6.45	5.98	5.3	7.05	5.58	3.47	4.04	4.3	2.15	1.93	1.8	4.98	5.53	4.88	4.85	5	5.52	4.68	4.21	5.05	2.09	1.5	1.83	4.69	4.45	5.09	3.77	4.06	5.02	4.61	3	4.42	1.56	1.44	1.21	2.05	2.61	3.33	6.28
BnaA01G0132500ZS	186.85	191.84	194.92	124.67	141.96	144.51	151.72	158.72	176.96	176.93	177.23	164.92	161.99	178.34	183.75	142.71	140.59	132.65	143.62	148.14	142.61	161.67	163.23	149.78	200.27	192.41	190.18	181.32	167.71	174.27	184.9	173.72	181.09	234.19	238.44	223.63	167.79	178.58	192.5	147.35	169.4	158.51	133.39	123.98	132.49	190.81	201.11	190.89	185.21
BnaA01G0132600ZS	8.94	7.2	6.59	4.58	4.77	4.64	2.28	1.5	3.28	2.6	2.41	3.7	8.48	9.18	11.01	9.01	7.4	8.12	4.57	4.23	3.64	1.42	3.19	3.76	5.85	6.56	7.99	2.32	2.98	3.13	2.51	3.73	3.2	2.48	1.92	1.59	7.69	9.01	8.39	4.56	4.88	3.83	3.13	2.03	3.55	3.38	2.81	2.55	4.97
BnaA01G0132700ZS	19.81	16.57	17.31	11.97	12.44	13.39	5.32	5.54	5.3	4.4	3.68	3.35	19.34	22.68	24.02	15.48	14.02	12.47	7.26	6.76	6.98	3.69	3.98	4.04	19.46	16.63	15.13	12.34	11.23	11.33	3.76	4.41	4.28	1.92	2.55	1.91	17.8	17.57	20.07	10.29	11.83	11	4.8	5.19	4.65	3.63	3.03	3.27	22.62
BnaA01G0132800ZS	0.19	0.18	0.18	0	0.49	0	0.84	0.53	0.4	0.36	0	0.35	0.73	0.18	0.64	0.15	0.59	0.54	0	0	0	0.87	0.33	0.15	0.2	0.19	0	0	0.21	0.46	0.65	0.63	0	0.4	0	0	1.15	0.18	0	0	0	0.2	0	0	0.24	0	0.22	0	0.19
BnaA01G0132900ZS	0	0	0.05	0	0	0.09	0	0	0	0.14	0.46	0.71	1	0	0.43	0	0	0.15	0.16	0.07	0	0.79	0.73	0.46	0	0	0	0.06	0.34	0.02	0.19	0.38	0	0.09	1.01	2.08	0	0	0.27	0.29	0	0	0.33	0.2	0	0.59	0.73	0.27	0.19
BnaA01G0133000ZS	0	0	0	0	0	0	0	0	0	0	0	0	0	0	0	0	0	0	0	0	0	0	0	0	0	0	0	0	0	0	0	0	0	0	0	0	0	0	0	0	0	0	0	0	0	0	0	0	0
BnaA01G0133100ZS	0	0	0	0	0	0	0	0	0	0	0	0	0	0	0	0	0	0	0	0	0	0	0	0	0	0	0	0	0	0	0	0	0	0	0	0	0	0	0	0	0	0	0	0	0	0	0	0	0.21
BnaA01G0133200ZS	0	0.08	0.09	0	0	0	0	0	0	0	0	0	0.03	0.06	0	0.08	0.06	0.03	0	0	0	0	0	0	0	0	0	0	0	0	0	0	0	0	0	0	0.03	0	0	0.03	0	0	0	0	0	0.04	0.07	0	0
BnaA01G0133300ZS	0	0	0.86	0	0	0	0	0	0	0.2	0.16	0	0.37	0.63	0	0.32	0.62	0.2	0.46	0	0	0	0.22	0.22	0.41	0.67	0.52	0	0	0.32	0	0	0	0	0.12	0	0	0.36	0.15	0	0.13	0.12	0.18	0.13	0	0	0	0.31	0.31
BnaA01G0133400ZS	1.92	2.28	2.21	2.42	1.58	1.74	1.76	2.11	2.31	1.43	1.98	1.42	1.71	1.2	1.41	1.9	1.89	1.98	1.95	2.28	1.98	1.36	1.08	1.43	1.88	1.93	2.75	2.72	1.76	2.21	2.24	1.74	1.49	2.52	2.43	2.58	1.67	1.81	1.42	1.76	2.11	1.95	1.66	2.44	2.14	1.37	1.45	1.22	2.6
BnaA01G0133500ZS	8.42	8.06	7.6	8.77	8.44	7.92	6.41	6.26	6.88	7.08	6.52	6.97	10.98	10.93	10.65	10.15	11.26	10.65	6.08	6.41	6.43	5.56	6.47	4.95	9.81	9.19	9.3	6.68	5.97	6.17	6.9	6.44	5.99	5.59	6.01	6.39	8.46	8.35	8.04	5.81	6.55	6.02	3.81	3.84	3.85	2.47	2.62	2.73	8.43
BnaA01G0133600ZS	0	0	0	0	0	0	0	0	0	0	0	0	0	0	0	0	0	0	0	0.09	0	0	0	0	0	0	0	0	0	0	0	0	0	0	0	0	0	0	0	0	0	0	0	0	0	0	0	0	0
BnaA01G0133700ZS	0.3	0.53	0.36	0.86	0.74	0.53	1.33	1.72	1.61	3.23	3.26	2.04	0.9	1.11	1.83	0.73	0.77	0.66	0.88	0.72	0.87	2.99	2.9	1.96	0.15	0.33	0.21	0.75	0.64	0.21	2.75	2.9	3.85	9.66	8.67	7.59	0.45	0.27	0.35	0.66	0.27	0.6	1.47	1.19	1.33	7.06	7.03	6.16	0.7
BnaA01G0133800ZS	0.15	0.25	0.28	0.68	0.31	0.62	0	0	0	0	0	0	0.61	0.54	0.31	0.68	0.62	0.61	0.05	0.09	0.07	0	0	0	0.22	0.26	0.43	0.2	0.3	0.2	0.07	0.14	0.08	0	0	0	0.48	0.57	0.41	0.24	0.61	0.56	0	0.13	0.1	0	0	0	0.02
BnaA01G0133900ZS	0.21	0	0.07	0.03	0.08	0.1	0.12	0.41	0.18	0.03	0.07	0	0.62	0.07	0.7	0.48	0.29	0.45	0.63	0.44	0.44	1.03	1.59	1.33	0.46	0.82	0.77	3.6	3.53	4.45	0.94	1.17	0.85	0.43	0.08	0.38	0.35	0.53	0.31	4.44	4.87	4.32	3.5	2.59	2.51	2.17	3.13	2.46	0.16
BnaA01G0134000ZS	0	0	0	0	0	0	0	0	0	0	0	0	0	0	0	0	0	0	0	0	0	0	0	0	0	0	0	0	0	0	0	0	0	0	0	0	0	0	0	0	0	0	0	0	0	0	0	0	0
BnaA01G0134100ZS	0	0	0	0	0	0	0	0	0	0	0	0	0	0	0	0	0	0	0	0	0	0	0	0	0	0	0	0	0	0	0	0	0	0	0	0	0	0	0	0	0	0	0	0	0	0	0	0	0
BnaA01G0134200ZS	10.52	10.09	9.72	7.85	6.02	7.23	7.9	6.79	7.44	4.1	4.33	4.91	18.64	19.36	18.87	17	15.92	16.24	11.85	10.6	10.2	9.44	8.78	8.04	14.66	15.74	15.06	16.93	17.24	15.15	8.97	10.04	9.63	6.04	5.87	6.31	18.08	17.36	16.27	16.55	14.94	17.2	10.06	9.92	10.1	7.24	7.23	6.52	19.07
BnaA01G0134300ZS	0	0	0	0	0	0	0	0	0	0	0	0	0	0	0	0	0	0	0	0	0	0	0	0	0	0	0	0	0	0	0	0	0	0	0	0	0	0	0	0	0	0	0	0	0	0	0	0	0
BnaA01G0134400ZS	2.85	3	3.04	2.89	2.73	2.79	2.24	2.64	2.05	2.32	2.71	2.5	3.54	3.65	2.97	3.04	3.51	3.59	2.11	2.54	2.32	2.06	2.38	2.62	4.22	3.7	4.01	3.24	2.77	2.43	2.59	2.74	3.82	4.36	3.78	4.54	2.98	3.55	3.45	2.19	3.05	2.04	2.49	2.48	2.83	3.04	3.28	3.48	3.33
BnaA01G0134500ZS	0	0	0	0	0	0	0.1	0	0	0	0	0	0	0	0	0	0.1	0	0	0	0	0	0	0	0	0	0.1	0.1	0.31	0.11	0.21	0.4	0	0	0	0	0	0	0.31	0	0	0.1	0.49	0.1	0.12	0	0	0	0.11
BnaA01G0134600ZS	0	0	0	0	0.07	0.18	0	0	0.1	0.03	0	0	0.23	0.08	0.27	0	0	0	0	0	0	0	0	0	0.14	0.22	0.22	0.41	0.19	0.2	0	0	0.16	0	0	0	0.07	0.2	0	0	0.28	0.08	0	0	0	0	0	0	0
BnaA01G0134700ZS	2.79	1.92	2.01	0.89	0.3	0.41	0.15	0.3	0.72	0.27	0.6	0	2.64	1.83	1.56	1.8	0.87	0.9	0.36	0.15	0.73	0.13	0.26	1.49	0.43	1.53	1.19	0.75	1.37	0.97	0.46	0.6	0	0.86	0.49	0.8	1.38	2.04	2.16	0.59	0.28	1.15	0	0.29	0.17	0.81	0	0	0.97
BnaA01G0134800ZS	1.23	0.84	0.49	1.2	1.34	1.59	0.69	0.8	0.73	0.04	0.1	0.27	0.35	0.24	0.36	2.62	2.3	2.35	0.65	0.94	1.37	0.1	0.04	0.11	0.54	0.43	0.58	2.27	1.33	1.29	0.94	0.83	0.45	0.24	0.79	0.48	0.47	0.62	0.46	1.49	1.1	0.88	0.88	0.83	0.83	0	0.11	0	0.23
BnaA01G0134900ZS	0	0	0	0	0	0	0.05	0	0	0	0	0	0.05	0	0	0	0	0	0.04	0	0.1	0.04	0.04	0	0	0	0	0	0	0	0	0	0	0	0	0	0	0	0	0	0	0	0	0.05	0	0.05	0	0.06	0
BnaA01G0135000ZS	0	0	0	0	0.11	0.06	0	0	0	0	0	0.09	0	0.11	0	0	0	0.04	0	0	0	0	0	0	0	0	0	0	0	0	0	0	0	0	0.06	0	0	0	0	0.05	0	0	0	0	0	0	0	0.07	0
BnaA01G0135100ZS	5.19	5.66	6.29	0.78	0.7	1.16	0.7	1.29	0.93	1.72	1.21	1.61	8.45	8.97	8.65	3.19	1.31	2.44	1.25	1.61	0.7	2.05	2.72	3.02	6.46	7.13	8.09	3.6	4.08	4.08	5.47	5.88	4.54	21.75	19.3	19.19	8.72	8.77	7.03	3.83	4.14	3.93	1.83	2.21	1.93	6.95	7.52	9.12	11.11
BnaA01G0135200ZS	1.33	2.06	1.81	1.35	1.32	1.78	3.02	3.33	2.93	3.13	2.23	4.22	15.14	10.64	10.56	14.25	12.2	12.04	5.72	7.12	7.1	1.93	2.82	3.23	3.14	1.95	3.57	3.01	1.82	1.37	3.54	4.44	3.73	3.13	4.68	4.33	7.8	5.13	5.67	3.35	2.63	2.75	3.76	4.39	3.41	14.63	13.82	14.87	3.97
BnaA01G0135300ZS	0.13	0	0	0	0.29	0	0.25	0.13	0	0.26	0	0	0.2	0	0.18	0.24	0	0.16	0.25	0	0.07	0	0	0	0.12	0	0	0.16	0.32	0	0.15	0.35	0	0.15	0	0	0	0	0	0	0	0.11	0.11	0.06	0	0.31	0	0.07	0.25
BnaA01G0135400ZS	0	0	0	0	0	0	0	0	0	0	0	0	0	0	0	0	0	0	0	0	0	0	0	0	0	0	0	0	0.29	0	0	0	0	0	0	0	0	0	0	0	0	0	0	0	0	0	0	0	0
BnaA01G0135500ZS	0	0	0	0	0	0	0	0	0	0	0	0	0	0	0	0	0	0	0	0	0	0	0	0	0	0	0	0	0	0	0	0	0	0	0	0	0	0	0	0	0	0	0	0	0	0	0	0	0
BnaA01G0135600ZS	0	0	0	0	0	0	0	0	0	0	0	0	0	0	0	0	0	0	0	0	0	0	0	0	0	0	0	0	0	0	0	0	0	0	0	0	0	0	0	0	0	0	0	0	0	0	0	0	0
BnaA01G0135700ZS	0.03	0.01	0.01	0.03	0.03	0	0	0	0	0	0	0	0	0.04	0	0.29	0.1	0.04	0	0.04	0.03	0	0	0	0.03	0	0	0	0.02	0	0.03	0.01	0	0.35	0.38	0.46	0	0	0	0	0.03	0.03	0	0.04	0	0.11	0.08	0.12	0
BnaA01G0135800ZS	0	0.06	0	0	0	0	0	0	0	0	0	0	0	0	0	0.04	0.03	0.01	0	0	0	0	0.01	0.04	0.02	0	0	0.02	0.03	0.02	0	0	0.02	0	0.04	0.03	0	0.02	0.03	0.02	0	0	0	0	0.08	0.02	0.02	0.08	0.02
BnaA01G0135900ZS	0.25	0.47	0.2	0.06	0	0.06	0.48	0.45	0.19	0.11	0.07	0.46	0.31	0.3	0.24	0	0.13	0	0.55	0.07	0	0.11	0.12	0	0.33	0.19	0.2	0.17	0	0	0.27	0.35	0.55	0.08	0.35	0.15	0.32	0.27	0	0.13	0.13	0.2	0.32	0.59	0.16	0	0	0	0.44
BnaA01G0136000ZS	0	0	0	0	0	0	0	0	0	0	0	0	0	0	0	0	0	0	0	0	0	0	0	0	0	0	0	0	0	0	0	0	0	0	0	0	0	0	0	0	0	0	0	0	0	0	0	0	0
BnaA01G0136100ZS	0	0	0	0	0	0	0	0	0	0	0	0	0	0	0	0	0	0	0	0	0	0	0	0	0	0	0	0	0	0	0	0	0	0	0	0	0	0	0	0	0	0	0	0	0	0	0	0	0
BnaA01G0136200ZS	2.88	3.35	3.06	5.02	5.57	4.98	6.81	6.32	6.6	7.2	7.13	7.96	4.66	5.28	5.12	7.24	7.53	6.99	6.99	6.61	6.91	7.25	7.67	7.59	5.08	4.61	4.4	9.06	9.61	8.44	9.27	9.84	9.78	22.68	24.09	24.22	4.6	4.58	4.5	8.66	9.61	8.82	7.47	6.59	7.12	16.08	15.35	16.09	4.64
BnaA01G0136300ZS	0	0	0	0	0	0.01	0	0	0	0	0	0	0.29	0.13	0.16	0.26	0.79	0.26	0	0	0.16	0	0	0	0.14	0	0	0	0	0	0	0	0	0	0	0	0.79	0.29	0.31	0	0	0	0	0	0.23	0	0	0	0.17
BnaA01G0136400ZS	65.05	63.54	64.06	30.15	29.45	29.07	8.69	9.38	7.91	6.39	7.97	8.05	92.87	94.11	95.31	32.09	30.61	30.24	10.7	11.43	12.05	8.42	8.04	8.7	50.27	45.32	48.27	32.88	32.92	33.81	9.87	11.34	12.29	7.05	6.28	7.04	41.12	41.84	40.1	24.26	20	22.8	11.03	11.24	11.04	9.92	11.05	9.63	64.53
BnaA01G0136500ZS	0	0	0.08	0.24	0.04	0.21	2.13	2.19	2.39	1.21	0.72	0.84	0.04	0.12	0.05	1.53	0.59	0.2	1.87	2.09	2.22	1.11	0.91	0.76	0.03	0	0.04	0.4	0.8	1.12	1.9	1.47	1.24	0.45	0.91	0.99	0	0.07	0	0.93	1.69	1.2	1.89	1.69	2.74	0.89	0.67	0.98	0.19
BnaA01G0136600ZS	6.11	4.89	5.5	2.69	2.59	2.61	1.76	1.48	2.68	1.22	0.91	1.56	9.59	7.96	7.48	3.26	4.72	4.42	2.39	1.96	2.14	1.74	2.26	2.68	10.32	8.56	10.09	5.59	5.04	4.79	2.96	3.38	3.71	1.15	1.42	1.79	8.98	11.03	10.12	5.59	6.43	5.28	3.12	4.57	3.48	1.88	2.18	2.42	9.46
BnaA01G0136700ZS	0	0	0	0	0	0	0	0	0	0.02	0	0	0.04	0	0	0	0	0.03	0	0	0	0	0	0	0	0	0	0.12	0.04	0.04	0	0	0.02	0.08	0	0	0	0	0.24	0.02	0.07	0	0	0	0.05	0	0	0	0
BnaA01G0136800ZS	8	6.81	8.88	2.26	2.26	3.54	3.01	4.02	3.8	1.18	0.73	1	4.15	6.21	6.73	3.82	3.09	3.12	3.81	3.93	3.37	1.89	1.23	1.69	5.62	6.63	5	3.1	4.7	2.96	1.93	2.93	2.03	0.57	1.1	0.93	4.79	4.1	4.05	4.1	5.09	3.19	2.96	2.86	3.59	0.42	0.72	0.36	8.72
BnaA01G0136900ZS	1.03	0.7	0.75	1	0.83	0.86	0.49	0.3	0.68	0.56	0.49	0.28	0.7	0.9	0.81	1.48	1.45	0.97	0.54	0.5	0.69	0.41	0.44	0.23	1.09	0.36	0.27	0.26	0.69	0.41	0.32	0.35	0.31	0.35	0.08	0.16	0.46	1.28	0.39	0.58	0.35	0.52	0.3	0.11	0.39	0.28	0.16	0.22	0.97
BnaA01G0137000ZS	6.06	7.18	6.54	4.66	5.89	6.59	9.79	12.41	11.68	10.21	10.99	11.43	7.1	7.35	6.88	5.66	5.85	7.76	9.14	10.04	9.49	13.82	14.48	12.15	6.78	7.63	6.85	9.38	12.28	10.05	12.35	12.03	10.9	14.84	10.77	12.62	6.37	5.85	6.54	7.99	11.55	10.23	10.03	8.43	9.2	12.93	14.48	16.14	7.68
BnaA01G0137100ZS	0.49	0.08	0	0	0.3	0	0.43	0.15	0.49	0.61	0.31	0	1.08	1.09	1.05	2.4	1.22	1.13	1.64	0.21	0	0.56	0	0.88	0.42	0.44	1.22	0.78	0.79	0.84	1.27	0.62	0.38	1.54	1.92	0.79	1.16	1.41	1.8	0.78	2.22	0.99	0	0.57	0.65	1.05	0.71	0.39	1.34
BnaA01G0137200ZS	0.84	1.3	1.14	5.03	4.87	4.23	7.67	9.35	7.42	18.19	16.38	20.08	1.87	1.62	1.99	12.88	13.75	12.34	13.67	19.23	15.9	15.64	15.81	20.4	6.45	7.42	7.09	27.78	23.54	23.83	23.8	25.53	26.35	28.29	29.58	31.87	5.64	5.37	3.76	22.71	22.23	19.82	12.32	11.22	11.92	19.72	18.88	19.62	3.41
BnaA01G0137300ZS	0.15	0.17	0.07	0.13	0.24	0.14	0.23	0.32	0.24	0.55	0.44	0.44	0.02	0.05	0.15	0.28	0.03	0.14	0.1	0.05	0.2	0.19	0.29	0.25	0.24	0.16	0.07	0.15	0.23	0.16	0.46	0.31	0.28	0.79	0.82	0.94	0.02	0.07	0	0.17	0.08	0.13	0.15	0.02	0	0.62	0.63	0.66	0.07
BnaA01G0137400ZS	0.49	0.64	0.07	0.32	0	0	0.22	0.38	0.36	0	0	0.06	0.59	0.52	0.31	0.06	0.07	0	0.14	0.07	0.07	0.13	0	0	0.51	0.84	0.22	0.07	0	0	0.68	1.43	0.67	0	0	0	0.08	0.22	0.54	0	0	0	0.51	0.14	0.29	0.24	0.33	0.09	0.73
BnaA01G0137500ZS	0	0.04	0	0	0	0	1.87	2.64	1.83	2.82	2.5	2.74	0	0.02	0	0.02	0.06	0	0.27	0	0.15	3.59	2.42	2.22	0	0.02	0.17	0	0	0	2.09	1.12	1.98	1.05	2.63	0.74	0.03	0.02	0.03	0.07	0.06	0.03	0.39	0.35	0.23	0.66	0.89	0.5	0.08
BnaA01G0137600ZS	0.18	0.32	0.52	0.31	0.51	0.57	0.23	0.19	0.47	0.3	0.08	0.27	0.66	0.56	0.43	0.95	0.57	0.73	0.26	0.27	0.16	0.26	0.19	0.37	0.32	0.31	0.21	0.42	0.61	0.5	0.2	0.25	0.39	0.61	0.89	0.98	0.79	0.7	0.41	0.25	0.4	0.73	0.22	0.14	0.34	0.86	0.74	0.43	0.41
BnaA01G0137700ZS	0	0	0	0	0	0	0	0	0	0	0	0	0	0	0	0	0	0	0	0	0	0	0	0	0	0	0	0	0	0	0	0	0	0	0	0	0	0	0	0	0	0	0	0	0	0	0	0	0
BnaA01G0137800ZS	9.34	8.33	7.13	4.12	3.74	5.15	4.78	6.53	5.95	4.4	4.95	4.76	7.4	10.43	10.19	5.08	5.6	5.88	4.16	4.22	4.65	5.73	5.55	4.37	5.72	8.37	8.18	11.91	10.79	9.6	9.31	7.15	6.12	4.76	6.42	6.99	5.68	6.9	7.3	8.42	8	10.02	5.04	4.05	5.98	5.94	5.67	6.86	6.15
BnaA01G0137900ZS	0	0	0.03	0	0	0	0	0	0	0	0	0	0	0.05	0	0	0	0	0	0	0	0	0	0	0.01	0	0	0	0	0	0	0	0	0	0	0	0.06	0	0	0	0	0	0	0	0	0	0	0	0
BnaA01G0138000ZS	0.56	0.55	0.64	0.9	0.68	1.09	0.63	0.39	0.41	0.25	0.18	0.15	0.89	0.86	0.62	1.3	0.9	1.13	0.37	0.34	0.34	0.44	0.15	0.76	0.38	0.65	1.02	0.67	0.4	0.96	0.15	0.04	0.08	0.47	0.46	0.19	0.85	0.48	0.66	0.73	0.82	0.54	0.35	0.24	0.41	0.11	0.19	0.21	0.67
BnaA01G0138100ZS	0	0.03	0	0.06	0	0.44	0.19	0.04	0.15	0	0	0	0.11	0.13	0.12	0.19	0	0.13	0.03	0.04	0.11	0	0.07	0	0.15	0.04	0	0.04	0.38	0.45	0.27	0.15	0.35	0.14	0.08	0	0.32	0.26	0.23	0.2	0.1	0.25	0.15	1.06	0.69	0.34	0.58	0.26	0.04
BnaA01G0138200ZS	71.28	61.72	65.28	31.73	32.36	33.39	29.32	31.22	25.18	15.31	14.16	16.13	95.41	100.14	98.83	32.11	37.8	35.99	30.65	28.77	27.36	18.32	13.41	19.23	26.06	26.5	24.23	22.44	20.1	23.35	14.29	17.47	16.66	6.85	6.78	2.49	37.39	26.55	27.42	14.1	8.62	15.89	19.33	21.82	19.85	11.34	10.59	10.8	46.9
BnaA01G0138300ZS	0	0	0	0	0	0	0	0	0	0	0	0	0	0	0	0	0	0	0	0	0	0	0	0	0	0	0	0	0	0	0	0	0	0	0	0	0	0	0	0	0	0	0	0	0	0	0	0	0
BnaA01G0138400ZS	8.47	6.41	7.23	7.09	7.45	5.58	3.73	4	4.13	4.54	4.7	4.88	4.73	4.11	3.85	6.77	5.3	6.15	3.35	3.97	4.7	5.21	5.53	6.87	4.67	6.43	7.86	5.69	6.77	6.96	3.16	3.01	3.66	6.4	5.6	6.55	4.81	8.3	6.28	7.16	6.58	7.13	3.9	3.33	3.86	3.03	3.33	2.72	4.44
BnaA01G0138500ZS	32.41	28.88	31.58	25.93	24.36	27.51	23.65	20.11	21.67	34.12	32.39	34.42	40.03	35.94	38.6	39.62	36.27	36.02	26.99	21.65	24.86	41.7	35.1	46.5	35	30.57	31.94	34.02	30.62	31.89	20.69	21.84	21.72	37.46	41.8	39.8	41.61	40.02	43.73	32.28	36.25	29.44	20.44	20.1	19.19	30.93	27.24	27.64	15.96
BnaA01G0138600ZS	0.27	0.22	0.03	0.05	0.13	0	0.22	0.16	0.09	0.14	0.06	0.18	0.19	0.11	0.07	0.43	0.37	0.22	0.18	0.09	0	0.13	0.14	0.17	0.12	0	0.13	0.06	0.29	0	0.16	0.41	0.29	0.03	0.1	0.07	0.2	0.25	0.23	0.15	0.12	0.21	0.12	0.09	0.11	0.03	0.1	0	0
BnaA01G0138700ZS	0	0	0.17	0.1	0	0.16	0	0	0	0.1	0	0	0.11	0.15	0	0	0.11	0.15	0	0.06	0.34	0	0	0.13	0	0.32	0.06	0.17	0.18	0.19	0.12	0.46	0	0.16	0.31	0.12	0.08	0.11	0	0.17	0.21	0	0.06	0.11	0.13	0	0.19	0.13	0.06
BnaA01G0138800ZS	0	0	0	0	0	0	0	0	0	0	0	0	0.03	0	0.03	0	0	0.02	0.21	0.08	0	0	0	0	0.11	0	0.08	0.2	0	0.06	0	0	0	0	0	0	0	0.06	0.03	0	0.02	0	0.03	0	0.03	0	0.03	0	0.17
BnaA01G0138900ZS	2.61	3.12	2.85	0.85	0.64	0.69	0.07	0.12	0.13	0.05	0.07	0	4.34	4.32	3.68	0.69	0.5	0.6	0.18	0.13	0.25	0.06	0.05	0.01	4.38	3.11	3.83	0.37	0.45	0.64	0.12	0.07	0.09	0.02	0.02	0.04	2.88	3.36	2.8	0.51	0.19	0.29	0.22	0.24	0.15	0.06	0.08	0	4.24
BnaA01G0139000ZS	0.07	0.26	0.16	0.91	0.62	0.83	0.3	0	0.15	0	0.08	0.13	0.82	0.8	0.32	0.52	1.49	0.07	0	0.22	0.07	0	0	0	0.72	0.52	0.64	0.24	0.48	0.28	0.08	0	0	0	0.08	0.08	0.88	0.37	0.16	0.08	0.28	0.29	0.23	0	0.09	0	0	0	0.6
BnaA01G0139100ZS	0	0	0	0	0	0	0	0	0	0	0	0	0	0	0	0	0	0	0	0	0	0	0	0	0	0	0	0	0	0	0	0	0	0	0	0	0	0	0	0	0	0	0	0	0	0	0	0	0
BnaA01G0139200ZS	4.75	5.16	4.62	7.01	7.02	6.98	3.61	4.21	4.22	4.22	4.28	4.71	6.57	7.14	6.4	8.3	7.55	8.4	5.14	5.19	5.38	4.22	4.81	4.68	6.6	6.96	6.98	4.78	6.04	6.21	4.54	4.13	3.84	4.95	4.57	4.65	6.14	6.04	5.51	4.79	4.09	4.73	3.49	3.46	3.7	4.04	3.88	4.23	5.55
BnaA01G0139300ZS	0	0	0	0	0	0	0	0.11	0.1	0	0	0	0.32	0.19	0	0.09	0.1	0.28	0.26	0.1	0	0.18	0.75	1.32	0	0	0	0	0	0	0	0	0	0	0.23	0	0	0	0	0	0.2	0.1	0	0	0	0	0	0	0.23
BnaA01G0139400ZS	4.13	5.52	4.75	4.64	4.87	3.82	4.82	3.36	3.64	3.07	4.44	3.55	6.01	5.44	5.51	5.21	5.62	5.29	5.07	5.21	4.85	4.1	3.97	3.93	4.6	3.36	3.1	4.49	3.15	5.1	4.27	4.72	2.34	3.73	4.12	2.82	4.33	3.95	0.77	4.52	3.28	5.08	3.96	3.65	4.44	3.5	3.27	2.02	4.29
BnaA01G0139500ZS	0	0	0	0	0	0	0.05	0	0	0	0	0	0	0.19	0	0	0.05	0	0	0	0	0.08	0	0	0	0	0	0	0	0	0.23	0.31	0.12	0.26	0.3	0.12	0	0	0	0	0	0	0	0	0	0.16	0	0	0
BnaA01G0139600ZS	0.42	0.89	0.68	0.7	0.4	0.4	0.67	0.76	0.6	0.62	0.98	0.26	0.66	0.88	0.64	0.87	1.37	1.16	0.35	0.15	0.21	1.01	0.78	0.91	0.68	0.4	0.45	0.62	1.16	1.03	0.54	0.53	0.98	1.37	1.04	1	0.03	0.99	0.35	0.64	0.79	0.38	0.33	0.27	0.42	0.76	0.74	0.47	1.03
BnaA01G0139700ZS	5.39	5.73	5.41	4.48	4.48	4.48	4.09	3.74	3.43	3.95	3.35	3.8	10.26	8.89	9.89	8.9	9.22	9.23	4.02	3.64	3.96	4.19	3.92	4.4	6.38	6.11	6.53	6.37	4.91	5.19	3.21	3.4	3.86	3.69	3.94	3.84	7.71	7.57	7.63	5.67	6.92	5.49	3.24	2.42	3.18	3.06	2.79	2.42	7.31
BnaA01G0139800ZS	0.13	0.12	0.13	0	0	0	0	0.1	0	0	0	0.03	0.17	0.09	0.11	0.09	0.03	0	0	0	0	0	0	0	0.03	0	0.17	0	0.03	0.07	0.18	0.17	0	0.1	0.04	0.04	0	0.13	0.11	0	0	0	0	0	0.04	0.3	0.04	0	0.04
BnaA01G0139900ZS	0	0	0	0	0	0.09	0	0	0	0	0	0	0.07	0	0	0	0.02	0	0	0	0	0	0	0	0	0	0	0	0	0	0	0	0	0	0	0	0	0	0.04	0.1	0	0	0	0	0	0	0.15	0	0
BnaA01G0140000ZS	0.64	1.66	0.92	0.59	0.68	0.35	0.98	0.31	0.69	0.51	1.15	0.48	0.88	0.7	0.65	0.97	1.26	0.82	0.78	0.52	0.55	0.93	1.48	1.14	0.25	0.3	0.9	2.06	0.53	1.74	0.99	0.38	1.07	0.54	0.52	0.93	0.76	1.25	1.57	0.61	1.89	0.36	0.68	0.61	0.77	0.52	0.46	0.33	1.78
BnaA01G0140100ZS	0	0	0	0	0	0	0	0	0	0	0	0	0.5	0.37	0.67	0.07	0.1	0	0	0	0	0	0	0	0	0.09	0	0.09	0	0	0.07	0.17	0	0	0	0	0.53	0.95	0.53	0	0	0.07	0	0	0	0	0	0	0
BnaA01G0140200ZS	0.74	0.71	1.15	2.07	2.22	2.08	1.3	1.4	1.06	0.93	0.83	0.91	0.99	0.99	1.24	2.49	2.25	2.49	1.34	1.21	1.47	1.48	0.76	0.91	0.97	0.85	1.19	1.57	1.51	1.37	1.07	0.86	0.77	1.27	0.85	1.25	1.09	1.09	0.92	1.33	1.06	1.17	1.07	1.01	1.04	0.86	0.72	1.16	1.32
BnaA01G0140300ZS	19	16.73	17.79	14.14	12.56	12.07	13.68	11.18	13.48	14.45	10.31	12.72	8.98	9.65	9.12	6.75	11.88	9.15	12.97	11.19	11.75	14.09	14.78	13.32	14.58	14.78	14.94	13.02	13.96	12.98	9.78	8.24	9.03	5.16	4.24	5.7	11.93	13.12	11.62	12.07	8.64	9.23	9.4	9.28	10.12	7.56	7.09	8.14	12.01
BnaA01G0140400ZS	0	0.02	0.04	0.19	0.54	0.36	0.67	0.69	0.76	0.27	0.29	0.29	0.02	0.02	0.02	1.16	0.38	0.51	0.39	0.65	0.74	0.38	0.31	0.31	0.05	0.06	0.04	0.04	0.31	0.08	1.1	1.58	1.1	0.68	0.75	0.51	0.08	0.07	0.04	0.32	0.36	0.39	0.45	0.69	0.42	0.28	0.48	0.41	0.04
BnaA01G0140500ZS	0	0	0	0.17	0	0.04	0	0	0	0	0	0	0	0.05	0	0.39	0.16	0.5	0.28	0.28	0	0	0	0	0	0	0	0	0	0.16	0	0.17	0	0.07	0	0.05	0	0	0	0	0	0	0	0	0	0	0.15	0	0
BnaA01G0140600ZS	0.07	0.62	0.36	0.74	0.93	0.31	0.1	0.45	0	0	0	0	0.92	0.93	0.81	1.06	1.27	1.75	0.34	0.27	0.61	0.09	0.05	0.09	0.15	0.62	0.41	0.4	0.69	0.32	0	0.12	0.15	0	0	0.03	0.63	0.44	0.48	0.26	0.56	0.48	0.26	0.7	0.25	0.06	0	0.16	0.61
BnaA01G0140700ZS	7.54	5.86	6.44	6.57	5.93	9.17	5.41	5.95	6.55	6.56	9.34	6.74	4.63	8.22	6.32	4.65	3.94	6.47	5.15	5.84	3.05	5.65	4.78	4.71	6.09	5.5	6.17	7.38	5.71	7.94	5.31	7.43	7.46	5.97	6.36	7.66	6.27	5.58	5.01	4.94	8.81	6.86	5.23	4.64	4.28	4.94	6.37	4.43	5.34
BnaA01G0140800ZS	0.15	0.43	0.41	0.86	0.84	0.52	0.39	0.5	0.75	0.96	1.48	1.22	0.85	0.94	1.24	1.44	1.73	0.89	1.02	0.37	0.36	0.79	0.83	0.52	0.33	0.52	0.55	0.34	0.85	0.94	0.77	0.49	0.48	1.13	1.85	0.99	1.16	0.61	0.5	0.98	1.28	0.84	0.84	1.04	0.34	1.59	1.33	1.58	0.12
BnaA01G0140900ZS	6.81	7.51	7.29	6.6	5.95	5.51	7.54	6.82	7.43	5.37	5.34	5.6	8.62	8.34	7.72	7.38	7.8	8.68	9.01	8.62	9.17	7.01	7.25	6.3	6.55	6.09	6.75	6.51	7.14	7.79	6.14	6.48	5.59	3.91	3.88	2.89	5.74	5.97	5.51	6.65	6.36	6.61	6.42	6.56	6.77	4.66	5.39	5.04	6.48
BnaA01G0141000ZS	0.04	0	0	0	0	0	0	0	0	0	0	0	0.04	0	0.04	0.29	0	0	0	0	0	0	0	0	0	0	0.49	0	0	0	0	0	0	0	0	0	0	0.2	0.28	0.04	0	0	0.2	0	0	0	0	0	0.03
BnaA01G0141100ZS	0	0	0	0	0	0	0.17	0.24	0	4.79	4.55	4.34	0	0	0	0	0	0	0	0	0	3.81	2.53	3.16	0	0	0	0	0	0	0.76	1.26	1.46	4.95	5.17	4.52	0	0	0	0	0	0	0.22	0.41	0	6.88	6.67	7.31	0
BnaA01G0141200ZS	0.03	0.04	0	0	0	0	0	0.02	0.03	0.02	0	0	0.08	0.09	0.16	0.01	0.1	0.04	0.01	0	0	0	0	0	0	0	0.05	0	0	0	0	0	0	0.02	0.02	0	0	0.04	0.02	0	0	0	0	0	0	0	0	0	0.08
BnaA01G0141300ZS	2.62	2.68	2.67	2.13	2.13	1.74	2.75	2.74	2.53	3.8	3.78	3.8	3.92	4.17	4.39	3.76	3.13	3.07	2.81	2.32	2.45	3.34	3.47	2.67	3.04	3.36	2.97	3.38	3.41	3.36	2.88	2.67	1.96	5.23	4.44	5.42	3.01	3.92	3	2.81	3.54	2.68	1.87	1.79	2.16	3.61	3.55	3.61	3.61
BnaA01G0141400ZS	0	0	0	0	0	0	0	0.09	0	0	0	0	0	0	0	0	0	0	0	0.14	0.09	0	0	0.28	0	0	0	0	0	0	0	0	0.11	0	0	0	0	0	0	0.16	0.3	0	0.15	0	0	0	0	0	0
BnaA01G0141500ZS	15.36	13.34	13.83	11.19	9.66	10.32	9.19	9.1	6.99	6.82	7.61	7.74	16.71	17.28	16.5	19.2	21.38	21.22	12.2	13.21	11.86	7.39	8.28	7.61	12.25	12.56	11.41	8.7	8.47	10.78	8.68	8.37	6.98	4.77	4.77	5.53	14.12	13.66	12.82	10.99	9.68	11.12	7.15	6.87	6.58	7.14	6.46	6.47	10.32
BnaA01G0141600ZS	2.79	2.07	2.65	1.66	2.3	1.41	2.36	2.25	2.74	2.79	1.55	2.84	3.23	2.23	2.06	2.75	2.94	3.16	3.35	2.95	3.38	2.97	3.14	3.39	2.84	1.03	1.61	1.65	3.96	1.24	3.03	3.16	2.44	2.94	2.72	1.99	2.76	1	1.98	3.18	2.44	4.18	1.42	2	2.29	2.92	2.71	2.61	1.23
BnaA01G0141700ZS	2.18	2.17	2.61	1.79	2.27	1.7	0.6	0.68	0.8	0.47	0.07	0.25	4.61	5.38	4.54	1.74	2.04	1.64	0.36	0.15	0.36	0.85	1.53	1.53	26.81	23.99	24.11	6.33	5.78	6.35	3.96	4	4.32	4.68	5.25	4.84	23.97	22	24.29	3.33	3.91	2.88	3.21	1.74	2.55	2.6	2.23	2.98	6.41
BnaA01G0141800ZS	1.46	1.78	1.3	0.92	1.18	1.17	0.52	0.74	0.38	0.43	0.41	0.46	2.13	2.45	2.27	1.39	1.88	1.76	0.59	0.86	0.7	0.51	0.39	0.35	1.3	1.81	1.69	0.99	1.28	0.96	0.36	0.52	0.43	0.21	0.13	0.26	1	1.47	1.4	0.69	1.02	0.99	0.51	0.25	0.44	0.06	0.14	0.13	1.71
BnaA01G0141900ZS	0	0	0.37	0.97	0.8	1.07	0	0.34	0.12	0.2	0	0	1.7	0.59	1.28	0.44	1.93	0.44	0.81	0.93	0.5	1.02	0.17	0.21	0.42	0.89	0.08	0	0	0	1.14	1.11	0.44	0.42	0.71	0	0.61	1.24	0.03	0	1.2	0	0	0.64	0.48	0.19	0.91	0.12	0.3
BnaA01G0142000ZS	6.23	6.62	6.6	6.21	6.16	6.15	5.31	5.03	5.09	3.47	3.1	3.53	13.04	12.89	11.86	12.78	12.94	14.41	8.33	8.41	8.1	4.61	5.08	4.85	9.19	9.2	9.2	7.84	7.79	7.47	5.42	5.37	5.68	3.32	2.75	3.17	10.74	11.45	10.13	9.45	8.76	9.99	6.34	7.14	6.37	2.06	1.84	2.41	8.79
BnaA01G0142100ZS	2.89	3	3.26	11.07	13.02	13.15	6.06	6.48	6.67	6.08	6.07	4.89	5.34	6.19	5.85	14.54	17.29	15.96	8.96	9.25	8.77	7.32	8.48	6.97	7.13	6.56	7.11	10.41	11.04	11.14	4.05	3.78	4.5	2.57	2.8	2.41	5.81	6.78	6.19	9.71	8.85	10.54	6.43	5.56	7.23	4.47	4.24	4.54	4.72
BnaA01G0142200ZS	0.52	1.56	1	1.58	1.32	1.06	0.35	0.35	0.94	0.48	0.19	0.18	1.09	1.89	1.59	2.63	1.53	2.05	1.07	0.94	0.81	1.33	0.68	0.27	2.03	2.55	2.85	1.48	1.87	1.63	1.16	0.48	1.72	0.65	1.15	0.81	2.16	2.64	2.6	1.39	1.58	1.76	0.9	1.67	0	0.43	0.6	0.5	2.3
BnaA01G0142300ZS	0	0	0	0	0	0	0.06	0	0	0.45	0	0.23	0	0	0	0	0	0	0	0	0	0.68	1.01	0.96	0	0	0	0	0	0	0.13	0.13	0.07	0.52	0.49	0.92	0	0	0	0	0	0	0	0	0.07	0.32	1.27	0.28	0
BnaA01G0142400ZS	0.05	0.13	0.05	3.79	3.56	2.47	9.41	9.17	9.66	8.41	10.21	10.19	0.09	0.09	0.11	2.03	3.49	1.98	8.65	8.2	8.05	7.5	7.42	9.83	0.15	0.15	0.05	2.49	2.73	1.77	11.41	11.26	13.01	14.5	16.31	13	0	0.15	0.05	2.52	2.95	2.85	10.45	8.67	9.57	16	13.1	13.29	0.04
BnaA01G0142500ZS	0	0	0	0	0.04	0	0	0	0	0	0	0	0	0	0	0	0	0	0	0	0	0	0.08	0.07	0	0	0	0.04	0	0	0	0	0	0	0	0	0	0	0	0	0	0.06	0	0	0	0	0	0	0
BnaA01G0142600ZS	0	0	0.09	0.1	0	0	0.1	0	0	0	0	0	0	0.16	0.07	0	0.14	0.13	0	0.25	0	0.09	0	0	0	0	0	0.14	0.57	0.04	0	0	0	0.56	0	0.17	0	0	0	0	0	0.2	0	0	0	0	0	0	0
BnaA01G0142700ZS	8.8	5.42	7.66	7.06	7.18	7.65	3.91	6.29	5.58	6.08	6.93	5.59	7.05	7.65	7.97	6.11	5.5	6.12	5.04	5.37	3.99	5.56	5.55	4.86	7.19	7.61	8.01	9.09	6.2	6.61	5.45	7.2	6.01	6.79	4.29	7.77	5.66	6.73	6.89	7.04	5.37	7.64	5.59	3.8	5.33	4.69	5.06	5.76	10.32
BnaA01G0142800ZS	0.18	0.2	0	0.16	0.22	0	0	0.13	0.15	0.28	0.12	0.3	0.15	0.25	0.34	0.02	0.18	0.04	0	0.12	0.12	0	0.1	0	0.23	0.16	0	0.35	0.06	0.2	0.24	0.09	0	0.08	0	0.31	0.17	0.15	0.06	0.16	0	0.27	0	0	0.09	0.05	0.1	0	0.36
BnaA01G0142900ZS	48.69	47.77	47	36.83	36.26	36.69	32.56	33.64	33.09	31.39	32.18	31.28	48.92	49.85	52.54	45.16	45.1	45.04	35.26	37.67	36.21	42.59	44.35	39.56	49.57	49.63	46.66	44.24	45.44	43.33	45.85	45.05	44.2	57.42	60.36	58.35	52.07	54.05	55.53	43.76	47	44.65	32.11	32.87	32.6	55.95	59.09	56.99	41.58
BnaA01G0143000ZS	0	0	0	0.13	0.25	0.1	0.07	0.06	0.13	0.05	0	0.09	0	0.04	0	0.18	0.16	0.23	0.1	0.06	0	0	0	0	0	0.09	0.11	0	0.17	0.19	0.11	0.12	0.06	0.1	0	0	0	0.17	0	0.07	0	0.14	0	0.07	0	0.08	0.04	0.1	0
BnaA01G0143100ZS	0.02	0	0	0.05	0	0	0.06	0	0	0	0	0	0.11	0.1	0	0.05	0	0	0	0	0	0	0	0	0	0	0	0	0	0	0	0.06	0	0	0	0.18	0	0	0	0	0	0	0	0	0	0	0	0	0
BnaA01G0143200ZS	6.6	6.63	6.95	4.83	4.56	4.73	4.17	4.33	3.81	3.26	2.87	3.31	8.39	7.03	7.96	5.7	5.83	5.19	3.74	4.91	4.08	3.82	3.93	4.31	3.91	4.6	3.7	6.98	6.66	7.45	3.36	2.31	2.36	1.01	1.57	1.85	4.05	3.46	4.34	6	5.75	5.47	3.1	1.3	2.03	0	0.41	0.01	6.09
BnaA01G0143300ZS	0	0	0.59	2.53	0.85	1.45	1.75	2.37	3.07	3.31	2.83	2.3	0.03	0	0	1.75	1.65	0.71	0.57	2.22	1.68	1.35	1.65	2.17	0	0	0	2.17	3.02	2.4	3.59	4.27	5.6	7.83	6.02	7.48	0.35	0	0.42	1.07	0.24	2.77	2.72	0.73	0.63	5.07	6.46	5.98	0
BnaA01G0143400ZS	0.79	0.61	1.25	2.29	1.19	2.31	0.61	0.18	0.46	0	0.49	0.99	1.53	1.28	1.81	0.61	0.89	1.61	0.91	0.11	1.52	0	0.52	0	1.81	0.5	2.18	1.55	2.56	1.75	1.49	0.44	0.99	0.97	0	0.42	1.26	1.24	0.81	1.68	1.47	0.64	0	1.4	0.05	0.04	0.29	0.38	0.68
BnaA01G0143500ZS	0	0	0	0	0	0	0	0	0	0	0	0	0	0	0	0	0	0	0	0	0	0	0	0	0	0	0	0	0	0	0	0	0	0	0	0	0	0	0	0	0	0	0	0	0	0	0	0	0
BnaA01G0143600ZS	0	0.02	0	0.36	0.47	0.47	0.17	0.09	0.25	0	0	0	0	0	0.06	0.55	0.39	0.57	0.44	0.08	0.76	0.05	0.03	0.02	0	0.08	0	0.26	0.15	0.13	0	0	0.03	0	0	0	0.03	0	0	0.2	0.35	0.17	0.43	0.2	0.17	0.03	0	0.03	0
BnaA01G0143700ZS	0.17	0.12	0.14	5.57	5.53	2.95	1.15	0.81	0.69	0.44	0.59	0.53	0.56	0.57	0.61	5.42	5.68	6.3	2.75	1.03	1.99	0.79	0.42	0.64	1.71	1.77	1.22	2.67	3.46	3.01	0.5	0.06	0.48	0.22	0	0.4	0	0.65	0.85	3.4	4.29	2.24	1.13	0.87	1.73	0.15	0	0.17	0.09
BnaA01G0143800ZS	5.75	5.41	6.05	5.96	5.15	4.78	2.83	3.01	2.36	3.34	2.75	3.75	7.34	6.8	7.48	6.59	6.44	6.84	4.11	4.47	3.78	3.11	3.23	4.29	5.3	4.82	5.52	5.14	5.42	6.07	2.94	3.05	2.55	4.51	4.02	4.28	5.57	4.33	4.69	4.72	4.91	4.56	3.03	3.67	3.41	2.92	2.45	2.61	4.91
BnaA01G0143900ZS	4.32	2.46	3.57	9.36	7.95	7.91	8.08	6.67	7.24	6.08	5.65	6.35	1.52	2.78	2.42	5.66	7.1	6.13	4.51	4.11	4.32	3.81	4.45	6.43	13.34	11.23	11.14	21.63	22.1	20.49	12.1	13.06	12.63	11.21	12.26	12.12	3.32	2.71	3.53	6.58	9.45	8.16	3.61	3.67	5.35	6.03	6.54	5.05	7.57
BnaA01G0144000ZS	30.41	30.55	30.04	31.46	24.79	27.93	15.11	15.09	15.15	15.37	16.51	14.92	31.54	32.48	33.31	25.08	27.74	26.33	16.47	16.23	14.59	15.16	15.31	14.98	31.89	30.36	31.75	23.07	24.65	23.06	16.67	16.21	16.47	20	18.74	18.22	28.31	27.6	26.15	19.45	17.59	18.73	11.49	11.3	12.7	12.37	13.57	15.6	28.37
BnaA01G0144100ZS	8.42	9.29	8.27	8.64	8.39	8.24	5.28	5.27	5.07	4.14	5.44	4.97	12.54	12.28	9.96	10.85	11.93	11.9	8.44	6.87	7.07	7.01	6.5	5.84	7.14	7.24	7.98	6.55	6.84	7.17	3.04	4.16	4.09	3.91	3.58	2.8	6.6	5.97	7.49	6.04	6.18	5.43	4.15	4.12	4.32	4.44	4.76	4.55	10.35
BnaA01G0144200ZS	7.56	6.3	8.18	2.97	4.68	1.51	2.97	2.8	2.6	0.39	2.4	2.02	8.57	4.43	1.29	2.48	1.93	4.52	2.58	3	1.77	2.51	1.74	3.21	7	4.35	6.44	4.82	3.27	2.37	0	3.44	0.47	4.35	0.71	2.21	6.3	8.26	9.22	1.96	0	4.07	1.29	1.62	0.94	2.78	1.9	3.84	3.93
BnaA01G0144300ZS	0	0	0	0	0	0	0	0	0	0	0	0	0	0	0	0	0	0	0	0	0	0	0	0	0	0	0	0	0	0	0	0	0	0	0	0	0	0	0	0	0	0	0	0	0	0	0	0	0
BnaA01G0144400ZS	0	0	0	0	0	0	0	0	0	0	0	0	0	0	0	0	0	0	0	0	0	0	0	0	0	0	0	0	0	0	0	0	0	0	0	0	0	0	0	0	0	0	0	0	0	0	0	0	0
BnaA01G0144500ZS	9.19	7.06	8.91	3.8	4.28	3.58	7.94	7.23	7.41	5.15	7.15	5.67	10.07	7.07	9.49	5.8	6.39	3.83	5.25	7.3	5.72	7.8	7.67	8.66	11.78	12.65	12.63	6.6	4.95	6.42	5.89	7.52	5.92	4.91	5	7.06	12.9	9.2	12.05	6.75	7.74	7	5.29	2.83	6.04	4.44	4	3.23	7.11
BnaA01G0144600ZS	2.02	1.82	1.75	1.02	1.32	1.24	1.01	1.73	1.48	0.7	1.71	0.77	2.25	1.28	2.26	1.6	2.06	1.62	2.16	1.52	2.16	1.94	1.7	1.7	1.15	2.21	1.21	1.42	1.34	1.38	1.25	1.4	1.31	1.94	1.58	1.09	2.01	1.37	2.12	1.74	1.21	1	1.37	1.1	1.88	1.13	1.51	1.43	2.77
BnaA01G0144700ZS	0.11	0.07	0	0	0	0	0	0	0	0	0	0	0.07	0	0	0	0	0	0	0	0	0	0	0	0	0	0	0	0	0	0	0	0	0	0	0	0	0.11	0	0	0	0	0	0	0	0	0	0	0
BnaA01G0144800ZS	9.92	6.34	7.45	6.59	5.97	5.8	7.5	6.62	3.43	2.8	4.05	3.64	8.28	8.25	8.26	9.87	5.07	7.25	5.53	6.42	5.92	1.7	4.14	5.05	1.8	4.72	2.36	3.53	3.44	1.28	4.9	3.89	4.1	2.41	0.55	3.9	4.62	2.79	3.66	5.02	2.03	4.2	3.33	3.86	3.49	3.7	3.71	2.17	7.69
BnaA01G0144900ZS	0.77	1.32	1.53	1.52	1.47	0.92	0.34	0.44	0.47	0.38	0.34	0.44	0.87	0.96	0.82	1.96	1.8	1.09	0.82	0.85	0.8	0.65	0.68	0.31	0.84	0.99	0.53	1.06	0.94	0.68	0.45	0.39	0.78	0.51	0.26	0.31	0.51	0.33	1	0.71	0.54	1.02	0.67	1.35	0.78	0.58	0.37	0.56	0.61
BnaA01G0145000ZS	0	0	0	0	0	0	0	0	0	0	0	0	0	0	0	0	0	0	0	0	0	0	0	0	0	0	0	0	0	0	0	0	0	0	0	0	0	0	0	0	0	0	0	0	0	0	0	0	0
BnaA01G0145100ZS	0.23	0.42	0.26	0.05	0	0.07	0	0.13	0	0.06	0.07	0.05	0	0.79	0	0.44	0	0.55	0.18	0.1	0.07	0.03	0	0	0.13	0.42	0.14	0.18	0.07	0.56	0.11	0.03	0.28	0	0	0.09	0.66	1.06	0.89	0.32	0	0.36	0	0.08	0	0	0	0	0.67
BnaA01G0145200ZS	1.48	1.34	1.36	2.96	2.07	2.61	1.43	1.45	1.43	1.07	0.92	0.89	2.94	2.28	2.91	3	2.82	3.33	1.9	2.21	1.94	1.3	1.45	1.6	2.64	2.42	2.45	3.65	3.42	3.63	1.68	1.77	1.45	1.16	1.16	0.88	1.77	1.96	1.74	2.56	2.73	2.97	1.39	1.32	1.73	0.75	0.95	0.73	1.97
BnaA01G0145300ZS	0.11	0.39	0.41	0	0.4	0	0	0.11	0.12	0	0	0.11	0	0.7	0.87	0	0.33	0.41	0.11	0.53	0	0.15	0.36	0	0.34	0.11	0.13	0.31	0	0	0	0.14	0	0	0	0	0.43	0.18	0.64	0	0	0.12	0	0.1	0	0	0	0	0.39
BnaA01G0145400ZS	1.88	1.8	2.68	1.85	1.53	1.33	1.76	1.87	1.63	1.67	2.02	2.42	1.77	2.5	2.11	2.1	1.74	2	1.26	1.35	1.31	1.76	1.91	1.96	1.59	2.36	2.41	1.64	1.41	1.51	1.57	2.23	1.36	2.11	2.01	1.83	2.26	2.66	1.56	1.98	2.41	1.54	1.74	0.89	1.46	2.02	1.94	2.55	1.63
BnaA01G0145500ZS	0	0.77	0.57	0.13	0.15	0	0	0.45	0.14	0.92	0.15	0	0	0	0.62	0.39	0.43	0	0	0	0.15	0.38	0.13	0	0.29	0.42	0.3	0	0.3	0.32	0.15	0	0.35	0	1.14	0.16	0.47	0.44	0.93	0	0.28	0.14	0.15	0	0	0	0	0.35	0
BnaA01G0145600ZS	0	0	0	0	0	0	0	0	0	0	0	0	0	0	0	0	0	0	0	0	0	0	0	0	0	0	0	0	0	1.17	0	0	0	0.04	0	0	0	0	0	0	0	0	0	0	0	0	0	0	0
BnaA01G0145700ZS	0.65	0.3	0.4	0	0	0	0	0	0	0	0	0	0.34	0.12	0	0	0	0	0	0	0	0	0	0	0	0	0	0	0	0	0	0	0	0	0	0	0.07	0.07	0.22	0	0	0	0	0	0	0	0	0	0.38
BnaA01G0145800ZS	0.83	1.69	0.58	1.56	2.57	1.46	0.52	0.17	0.83	0.84	0.69	0.57	0.17	0.23	0.27	3.04	4.76	3.68	0.76	1.51	1.01	0	0.3	0.26	0	0	0	0.97	1.41	0.65	0.36	0.52	0.47	1.23	1.31	1.19	0.27	0.5	0	0.51	0.45	0.74	1.26	1.42	0.69	1.31	0.85	1.91	0.09
BnaA01G0145900ZS	0	0	0.03	0.03	0	0	0	0	0	0	0	0	0	0	0	0.01	0	0.03	0	0	0	0	0	0	0	0	0	0	0	0.02	0	0.02	0	0	0	0	0	0.02	0	0	0	0	0	0	0	0.07	0.02	0.04	0.02
BnaA01G0146000ZS	1.8	2.7	2.18	4.37	4.87	5.58	2.12	1.88	2.14	0.55	0.53	0.49	3.77	3.45	3.22	9.84	7.85	7.75	3.29	3.43	4.65	0.43	0.37	0.75	1.58	2.1	2.58	5.09	3.94	4.37	1.57	2.26	1.77	0.93	1.83	1.19	2.01	3.13	2.51	3.53	3.61	4.22	2.96	2.7	2.73	2.2	1.17	1.41	1.83
BnaA01G0146100ZS	12.88	13.29	11.85	13.88	12.61	11.93	13.09	12.26	11.19	10.61	8.9	9.32	18.58	23.54	22.71	21.53	20.4	21.27	16.81	14.38	16.49	14.37	12.03	15.12	19.46	21.47	20.52	13.37	13.53	14.89	14.07	15.82	13.63	12.57	16.08	16.73	22.98	19.72	24.29	15.86	16.91	15.66	13.72	14.03	13.42	9.38	7.49	8.54	16.84
BnaA01G0146200ZS	0	0	0	0	0	0	0	0	0	0	0	0	0	0	0	0	0	0	0	0	0	0	0	0	0	0	0	0	0	0	0	0	0	0	0	0	0	0	0	0	0	0	0	0	0	0	0	0	0
BnaA01G0146300ZS	0.02	0.07	0.05	0.04	0.03	0.16	0.08	0.03	0.02	0	0	0	1.6	0.97	1.13	1.29	1.25	1.54	0.58	0.5	0.27	0	0.02	0.06	0.1	0.02	0.32	0.23	0.13	0.29	0	0	0	0.07	0.07	0	0.03	0.03	0.16	0.19	0.12	0.21	0.18	0.15	0.24	0.22	0.23	0.36	0
BnaA01G0146400ZS	0	0	0	0	0	0	0	0	0	0	0	0	0.03	0.02	0	0	0	0.05	0	0	0	0	0	0	0	0	0.03	0	0	0	0	0	0	0	0.03	0	0	0	0	0	0	0	0	0	0	0.14	0.03	0	0
BnaA01G0146500ZS	51.02	53.59	50.37	56.28	59.52	62.52	52.14	50.83	54.76	86.09	86.24	81.5	58.03	64.1	71.87	71.87	73.94	65.2	49.33	48.45	49.35	86.14	84.58	76.45	53.06	51.21	47.04	54.52	52.58	57.76	50.41	55.67	53.41	58.81	61.89	62.2	45.56	50.16	47.35	39.59	48.33	49.25	38.57	36.02	39.36	57.43	57.35	60.31	66.15
BnaA01G0146600ZS	21.23	28.09	32.12	210.91	253.11	254	2985.94	3114.34	3385.11	3544.5	3821.27	3714.46	53.1	43.55	41.67	401.73	439.5	387.24	1994.3	2225.38	2271.24	3713.18	3790.91	3386.34	37.52	35.6	32.62	308.79	268.7	304.28	4244.53	4126.66	4393.12	3981.75	3654.61	3728.15	42.51	39.37	45.51	379.37	368.7	400.15	2121.11	1979.13	1834.53	3951.65	4253.71	3875.43	29.02
BnaA01G0146700ZS	0.13	0	0	0	0	0.67	0	0	0	0	0	0	0	0.04	0	0	0	0	0	0	0	0	0	0	0	0	0	0	0	0	0	0	0	0	0	0	0.01	0.3	0	0	0	0	0	0	0	0	0	0	0.09
BnaA01G0146800ZS	0	0	0.04	0	0	0	0	0	0	0	0	0	0.04	0	0	0.01	0	0	0	0.05	0.01	0	0	0	0	0	0	0	0	0	0	0	0	0	0	0	0.01	0	0	0	0.05	0	0	0.01	0	0	0	0	0.02
BnaA01G0146900ZS	0.77	0.59	0.52	2.21	2.23	2.23	1.18	1.41	1.74	3.85	3.62	4.03	0.93	0.74	0.74	1.83	1.76	1.85	0.63	0.69	1.55	1.26	2.4	2.11	1.53	1.2	1.05	0.67	1.02	0.88	9.96	9.06	9.37	31.93	30.64	33.81	0.85	1.05	1.48	1.31	1.14	1.78	2.01	1.57	0.96	11.28	11.92	12.11	0.4
BnaA01G0147000ZS	20.45	20.25	21.24	23.71	18.44	22.12	4.44	4.75	4.17	2.31	1.65	1.34	46.05	43.73	52.82	30.19	29.74	29.97	7.85	7.34	9.14	2.9	2.84	3.23	20.72	18.54	19.29	17.96	17.27	18.79	5.35	6.65	6.79	5.44	5.56	4.82	20.98	20.65	25.95	15.22	16.85	15.73	5.9	6.08	5.34	5.11	5.31	5.15	26.98
BnaA01G0147100ZS	0.88	1.87	1.8	1.95	2.06	1.98	1.22	1.18	1.14	0.76	0.42	1.09	2.67	2.46	3.75	2.78	2.42	2.7	1.23	0.95	1.06	0.8	0.86	0.45	1.82	1.65	1.64	2.26	1.79	2.73	0.97	1.64	0.66	0.43	0.86	0.56	0.87	1.97	1.75	1.25	0.84	1.19	1.33	0.91	1.22	1.22	0.95	0.97	2.49
BnaA01G0147200ZS	0	0	0	0	0	0	0	0	0	0	0	0	0	0	0	0	0	0	0	0	0	0	0	0	0	0	0	0	0	0	0	0	0	0	0	0	0	0	0	0	0	0	0	0	0	0	0	0	0
BnaA01G0147300ZS	0	0	0	0	0	0	0	0	0	0	0	0	0	0	0	0	0	0	0	0	0	0	0	0	0	0	0	0	0	0	0	0	0	0	0	0	0	0	0	0	0	0	0	0	0	0	0	0	0
BnaA01G0147400ZS	7	6.85	9.2	0.14	0.11	0.45	10.9	10.96	11.08	47.96	47.65	43.82	4.55	5.34	5.5	0.24	0.21	0.05	0.37	0.67	0.62	70.35	69.3	78.78	3.41	2.5	2.05	60.07	54.85	51.71	32.84	35.87	40.89	125.9	151.02	152.62	1.66	2.25	1.98	16.57	19.92	15.19	1.96	1.47	1.15	73.41	63.55	64.53	4.68
BnaA01G0147500ZS	3.37	3.2	3.55	7.24	5.41	5.83	3.95	3.65	3.64	3.75	5.13	3.98	4.62	4.96	5.09	9.57	8.34	7.48	4.11	4.32	4.3	4.46	3.86	4.74	4.28	4.87	4.56	5.16	4.03	5.47	4.88	4.5	3.76	7.66	7.47	8.24	5.76	5.34	5.98	5.08	5.74	5.54	2.97	3.46	4.13	6.69	6.2	6.26	2.69
BnaA01G0147600ZS	0.04	0	0.02	0.06	0	0.02	0	0.05	0	0	0	0	0.11	0.25	0.08	0.14	0.11	0.04	0.08	0.07	0.08	0.02	0.02	0.02	0.02	0	0	0.02	0	0.08	0.02	0	0.08	0.02	0	0.02	0.07	0.05	0	0.07	0	0	0.07	0.05	0.05	0	0.03	0.05	0.08
BnaA01G0147700ZS	0	0	0	0	0	0	0	0.21	0	0	0	0	0	0	0	0	0	0	0	0	0	0	0.54	0	0	0	0.21	0	0	0	0	0	0	0	0	0.44	0	0	0.21	0.61	0	0	0	0	0	0	0	0	0
BnaA01G0147800ZS	0	0	0	0	0	0	0	0	0	0	0	0	0	0	0	0	0	0	0	0	0	0	0	0	0	0	0	0	0	0	0	0	0	0	0	0	0	0	0	0	0	0	0	0	0	0	0.23	0	0
BnaA01G0147900ZS	1.8	2.17	2.08	1.01	1.27	1.47	1.67	1.45	1.87	1.58	1.37	1.83	2.67	2.8	2.5	2.28	2.52	2.56	2.32	2.27	1.68	0.88	0.9	0.89	1.1	1.02	1.16	1.81	1.95	0.88	1.57	1.45	2.02	1.44	1.14	1.06	1.2	1.7	1.37	1.33	1.42	1.76	1.54	1.48	2.09	8.51	7.65	7.6	2.35
BnaA01G0148000ZS	49.62	48.88	48.4	23.59	22.3	23.31	10.48	9.25	8.98	5.52	5.61	6.39	48.33	45.64	48.53	19.91	19.7	18.65	7.27	7.72	7.05	5.57	5.08	4.88	33.93	31.97	30.47	13.14	11.7	11.56	6.29	7.31	6.95	2.42	2.18	2.04	28.46	25.74	25.71	9.46	10.98	9.39	7.22	6.49	6.88	2.43	2.55	2.64	29.65
BnaA01G0148100ZS	0	0	0	0	0	0	0	0	0	0	0	0	0	0	0	0	0	0	0	0	0	0	0	0	0	0	0	0	0	0	0	0	0	0	0	0	0	0	0	0	0	0	0	0	0	0	0	0	0
BnaA01G0148200ZS	0	0	0	0	0	0	0	0	0	0	0	0	0	0	0	0	0	0	0	0	0	0	0	0	0	0	0	0	0	0	0	0	0	0	0	0	0	0	0	0	0	0	0	0	0	0	0	0	0
BnaA01G0148300ZS	0.11	0	0.11	0.32	0.06	0	0.06	0	0	0	0	0	0.4	0.36	0.49	0.2	0.28	0.2	0.19	0.11	0.06	0.18	0.05	0	0.3	0.06	0.08	0	0.16	0.19	0.06	0	0	0.28	0	0	0.55	0.35	0.14	0.06	0	0	0	0	0.13	0.57	0.13	0.73	0.06
BnaA01G0148400ZS	0.75	0.84	0.64	0.66	0.36	0.52	0.11	0.38	0.37	0.39	0.52	0.35	0.97	0.59	1.05	0.79	0.67	0.88	0.4	0.44	0.41	0.51	0.76	0.6	0.43	0.66	0.42	0.82	0.88	0.75	0.58	1.02	0.59	0.62	0.66	1.21	0.35	0.39	0.3	0.31	0.52	0.34	0.46	0.64	0.64	0.92	1.05	0.86	1.04
BnaA01G0148500ZS	1.13	0.52	1.29	0.98	0.89	0.63	0.45	0.75	0.86	0.49	0.37	0.35	0.59	0.61	0.73	0.88	1.67	0.65	0.93	0.59	0.36	0.7	0.73	0.39	0.68	0.59	1.02	0.56	1.09	0.45	1.01	0.78	0.7	0.71	0.76	1.18	0.59	0.45	0.32	1.32	0.73	0.64	0.32	0.47	0.48	0.43	0.7	0.49	0.4
BnaA01G0148600ZS	0	0	0	0	0.08	0	0	0	0	0	0	0.13	0	0	0.08	0.07	0.07	0	0	0	0	0	0	0	0	0	0	0	0.08	0.08	0	0	0	0	0	0	0	0.23	0	0.23	0	0	0	0	0.18	0.17	0	0.18	0
BnaA01G0148700ZS	0	0.06	0.1	0.03	0.03	0.09	0.07	0.58	0.29	0.15	0.34	0.2	0.07	0.36	0.36	0.98	0.85	0.9	1.7	1.18	1.97	0.39	0.21	0.15	0.1	0	0.1	0.24	0.27	0.4	0.11	0.17	0.43	0.06	0	0.07	0.18	0.2	0.21	0.53	0.12	0.19	0.9	0.81	0.85	2.19	3.25	2.59	0.15
BnaA01G0148800ZS	0	0	0	0	0	0	0	0	0	0	0	0	0.55	0.08	0.2	0	0	0	0.08	0	0	0	0	0	0	0	0	0	0	0	0	0	0	0	0	0	0.14	0	0	0	0.26	0	0	0	0.11	0.1	0	0.44	0.06
BnaA01G0148900ZS	5.36	5.36	4.55	4.9	4.62	4.51	4.52	4.55	3.97	3.33	4.05	3.96	5.39	5.29	4.57	3.94	4.22	3.06	3.28	3.5	3.66	3.19	2.94	4.42	6.53	6.69	4.78	5.82	4.87	5.3	5.44	5.78	5.3	2.66	3.65	3.69	4.13	4.32	4.73	3.8	4.4	4.51	2.24	2.87	2.69	2.76	3.04	3.16	4.26
BnaA01G0149000ZS	1.06	0.65	1	1.53	1.78	1.45	0.66	1.05	0.93	1.3	1.94	1.85	1.75	1.56	1.54	1.51	1.95	1.67	0.59	0.58	0.86	1.32	1.97	1.15	1.41	1.57	1.99	1.29	1.07	1.25	1.08	0.54	1.47	2.24	3.32	2.09	1.56	2.01	1.69	1.02	0.99	0.86	0.65	0.48	0.38	1.44	1.54	1.84	1.2
BnaA01G0149100ZS	2.75	2.65	2.96	3.18	2.91	3.42	4.55	4.81	4.31	6.18	5.82	6.08	2.97	3.07	2.91	3.66	3.23	3.37	3.45	3.91	3.66	5.98	6.86	6.87	3.43	3.24	3.69	4	3.84	3.95	5.01	5.05	4.78	7.52	7.08	7.7	3.92	3.12	3.63	4.26	3.88	4.58	3.18	3.37	4.12	7.91	8.76	8.37	2.69
BnaA01G0149200ZS	0	0	0	0	0	0	0	0	0	0	0	0	0	0	0	0	0	0	0	0	0	0	0	0	0	0	0	0	0	0	0	0	0	0	0	0	0	0	0	0	0	0	0	0	0	0	0	0	0
BnaA01G0149300ZS	0	0	0	0	0	0	0	0	0	0	0	0.04	0	0	0	0.09	0	0	0.04	0	0	0	0	0	0	0	0	0	0.17	0	0	0	0	0	0	0	0	0	0	0.05	0	0	0	0	0	0.12	0.06	0	0
BnaA01G0149400ZS	0.09	0.37	0.18	0.74	0.63	0.82	0.41	0.41	0.24	0.08	0.09	0.21	0.28	0.49	0.29	0.81	0.99	0.94	0.65	0.43	0.27	0.03	0.14	0.14	1.3	0.99	1.22	0.27	0.42	0.07	0.23	0.09	0.11	0.28	0.14	0.24	0.89	0.34	0.42	0.12	0.23	0.24	0.06	0.59	0.29	0.14	0.17	0.48	0.03
BnaA01G0149500ZS	0	0	0	0	0	0	0	0	0	0	0	0	0	0	0	0	0	0	0	0	0	0	0	0	0	0	0	0	0	0	0	0	0	0	0	0	0	0	0	0	0	0	0	0	0	0	0	0	0
BnaA01G0149600ZS	0	0	0	0	0	0	0	0	0	0	0	0	0	0.08	0	0	0	0	0	0	0	0.16	0	0	0	0	0	0	0	0	0	0	0	0	0	0	0	0	0	0	0	0	0	0	0	0	0	0	0
BnaA01G0149700ZS	0	0.11	0.68	0	0	0.11	0	0.34	0.33	0	0	0.15	0.62	0	0	0.4	0	0	0	0	0	0	0	0	0.14	0.14	0.32	0.3	0.15	0.87	0	0.11	0	0	0	0.75	0	0	0.25	0	0	0	0	0	0	0	0.18	0	0.95
BnaA01G0149800ZS	0	0	0	0	0	0	0	0	0	0	0	0	0	0.07	0	0	0	0	0	0	0	0	0	0	0	0	0	0	0	0	0	0	0	0	0	0	0	0	0	0	0	0	0	0	0	0	0	0	0
BnaA01G0149900ZS	0.58	0	0	0	0.24	0	0	0	0	0	0	0	1.84	1.29	1.87	0.81	1.82	0.94	0	0	0.08	0	0	0	1.44	0.59	1.17	0.23	0.56	0.25	0	0.08	0	0.07	0	0	2.88	2.32	2.18	0.95	0.51	0.59	0	0.08	0.09	0	0	0	0
BnaA01G0150000ZS	0	0	0	0	0	0	0	0	0	0	0	0	0	0	0	0	0	0	0	0	0	0	0	0	0	0	0	0	0	0	0	0	0	0	0	0	0	0	0	0	0	0	0	0	0	0	0	0	0
BnaA01G0150100ZS	0	0	0	0	0	0	0.04	0	0	0	0	0	0	0	0	0	0	0	0	0	0	0	0	0	0	0	0.04	0	0.17	0.05	0	0	0	0	0	0	0	0	0	0	0	0	0	0.04	0	0	0	0	0
BnaA01G0150200ZS	0.8	0	0.46	1.09	0.78	0.16	0.46	1.18	0.61	0.23	0.15	0.32	0.75	0.81	0	1.2	1.01	1.1	0.93	0	0.54	0.1	0	0.64	0.5	1.3	1.74	0.4	0.17	0.41	0.6	0.73	0.24	0	0	0	0	0.98	1.88	0	0	0.69	0.28	0.69	0.59	0.65	0.64	1.06	0
BnaA01G0150300ZS	6.73	7.91	7.26	7.33	6.65	6.91	5.66	4.83	4.25	4.2	4.46	3.78	8.33	6.81	7.09	8.48	8.66	8.32	6.17	5.74	5.98	2.78	2.96	3.21	5.46	5.64	6.03	5.37	6.27	5.16	4.34	3.78	3.99	4.89	4.89	5.14	5.63	6.57	4.9	6.28	5.51	6.18	3.68	4.56	4.8	4.09	4.27	3.79	7.17
BnaA01G0150400ZS	0	0	0	0	0	0	0	0	0	0	0	0	0	0	0	0	0	0	0	0	0	0	0	0	0	0	0	0	0	0	0	0	0	0	0	0	0	0	0	0	0	0	0	0	0	0	0	0	0
BnaA01G0150500ZS	0	0	0	0	0	0	0	0	0	0	0	0	0	0	0	0	0	0	0	0	0	0	0	0	0	0	0	0	0	0	0	0	0	0	0	0	0	0	0	0	0	0	0	0	0	0	0	0	0
BnaA01G0150600ZS	0	0.03	0	0	0	0	0	0	0	0	0	0	0	0	0	0	0	0	0	0	0	0	0	0	0	0	0	0	0	0	0	0	0	0	0	0	0	0	0	0	0	0	0	0	0	0	0	0	0
BnaA01G0150700ZS	0.14	0.39	0.12	0	0	0	0	0	0	0	0	0	0.04	0.02	0.21	0	0.02	0	0	0.04	0	0	0	0	0	0.02	0.02	0	0	0	0	0	0	0	0	0	0	0	0	0	0	0	0	0	0	0	0	0	0.22
BnaA01G0150800ZS	0	0	0	0	0	0	0	0	0	0	0	0	0	0	0	0	0	0	0	0	0	0	0	0	0	0	0	0	0	0	0	0	0	0	0	0	0	0	0	0	0	0	0	0	0	0	0	0	0
BnaA01G0150900ZS	2.87	2.35	3.36	2.54	2.1	1.67	1.4	1.58	1.02	2.28	0.91	1.42	2.52	1.82	1.86	1.65	2.54	2.38	1.6	1.02	1.07	1.41	1.12	1.12	2.1	2.16	3.11	2.41	1.82	1.36	1.01	1.4	1.61	0.69	0.1	0.63	2.54	3.24	1.51	1.43	0.74	1.64	1.95	0.73	0.94	1.02	0.86	0.65	3.35
BnaA01G0151000ZS	0	0	0	0	0	0	0	0	0	0	0	0	0	0	0	0	0	0	0	0	0	0	0	0	0	0	0	0	0	0	0	0	0	0	0	0	0	0	0	0	0	0	0	0	0	0	0	0	0
BnaA01G0151100ZS	0	0	0	0	0	0	0	0	0	0	0	0	0	0	0	0	0	0	0	0	0	0	0	0	0	0	0	0	0	0.09	0	0	0	0	0	0	0	0	0	0	0	0	0	0	0	0	0	0	0
BnaA01G0151200ZS	2.79	3.5	2.73	0.84	0.64	0.96	0.61	0.73	0.9	0.64	0.52	0.81	1.57	2.05	1.99	1.06	1.02	1.3	0.72	0.78	1.08	0.93	1.03	0.63	0.96	1.46	1.2	0.87	1.08	0.94	0.62	0.62	0.68	0.81	0.38	0.96	1.15	0.96	0.79	1.19	0.76	1.08	0.45	0.59	0.66	0.76	0.45	0.55	1.48
BnaA01G0151300ZS	21.43	22.98	19.74	33.42	37.58	41.72	12.02	11.12	11.99	4.81	4	4.43	34.28	30.81	36.05	40.22	36.35	37.69	18.95	17.04	16.28	8.97	7.54	6.41	55.1	44.82	45.44	44.98	42.08	41.75	17.11	15.48	16.31	5.41	5.65	5.63	47.27	44.9	50.42	37.27	50.11	41.69	19.18	17.82	19.62	7.62	6.54	7.06	20.94
BnaA01G0151400ZS	0	0	0	0	0	0	0	0	0	0	0	0	0	0	0	0	0.06	0	0	0	0	0	0	0	0	0	0	0	0	0	0	0	0	0	0	0	0	0	0	0	0	0	0	0	0	0	0	0	0
BnaA01G0151500ZS	0.17	0	0	0.05	0.02	0.07	0.28	0.45	0.24	0.1	0.19	0.3	0.11	0.07	0	0.26	0.49	0.26	0.16	0.18	0.11	0.33	0.39	1	0	0.03	0.06	0.1	0.12	0.03	0.18	0.17	0.14	0.06	0.16	0.12	0.08	0.03	0.08	0	0.07	0.02	0.29	0.22	0.39	0.62	0.5	0.66	0
BnaA01G0151600ZS	0.54	0.08	0.1	0.09	0.11	0.22	0.87	0.24	0.14	0	1.08	0	0	0	0.21	0.53	0.11	0.1	0.24	0.12	0	0.27	0.13	0.72	0	0	0.1	0	0	0.38	0	0.21	0	0	0.21	0	0	0.36	0	0	0	0.39	0.51	0.22	0.12	0.51	0.36	0.5	0
BnaA01G0151700ZS	0.27	0	0.11	0.59	0.64	0.89	0.11	0.17	0.11	0.31	0.29	0.48	0.11	0.05	0.06	0.1	0.34	0.15	0.09	0.34	0	0.05	0.15	0.04	0.06	0.16	0.29	0.23	0.45	0	0.12	0.06	0	0	0.38	0.61	0	0.06	0.36	0.4	0.32	0.33	0.11	0	0.2	0.19	0.25	0.08	0.06
BnaA01G0151800ZS	0	0	0	0	0	0	0	0	0	0	0	0	0.42	0.03	1.61	1.46	0	0	0	0	0	0	0.36	0.41	0	0.33	0	0	0	0	0	0	0	0	0.17	0	0.37	0.32	0.61	0	0	0	0	0	0	2.8	1.11	1.07	0
BnaA01G0151900ZS	0.01	0.83	0.52	0	1.18	1.02	0.06	0.72	0.38	0.14	0.5	0	1.04	1.56	1.13	0.76	0.78	0.19	0.33	0.41	0.61	0	0.26	0.3	0	0.13	0.96	0	0.66	0.76	0.8	0.93	0	0.37	0.3	0	0.38	0	0.18	1.91	1.49	0.03	0.75	0.23	0.58	1.25	1.54	1.14	1.31
BnaA01G0152000ZS	1.37	1.97	2.21	4.22	4.18	4.57	2.85	3.28	2.16	2.6	2.86	2.14	2.42	2.67	3.07	3.18	3.51	3.59	2.37	2.25	2.52	1.63	2.05	3.2	3.16	2.49	2.82	3.81	3.36	3.4	3.87	2.27	3.73	3.75	3.33	3.17	2.05	1.78	1.35	2.89	2.83	3.09	1.69	2.23	2.2	2.63	1.75	2.04	1.16
BnaA01G0152100ZS	6.37	6.06	6.2	9.23	11.09	13	1	2.89	1.56	0.94	0.99	0.69	3.79	8.09	6.62	6.91	7.66	7.6	3.16	2.57	1.33	0.98	0.06	0.92	5.69	7.23	6.44	6.5	8.91	7.29	1.26	1.28	0.91	1.72	0.49	1.44	4.87	5.2	5.62	3.74	4.33	4.86	1.46	1	2.37	0.87	0.95	0.26	3.98
BnaA01G0152200ZS	45.91	48.83	51.76	70.19	63.18	62.95	30.11	33.1	34.62	43.12	44.41	36.31	31.51	44.56	40.39	51.73	50.59	52.71	35.99	40.82	35.8	30.61	33.78	25.18	43.23	46.59	50.15	54.53	52.59	48.56	32.04	31.83	30.18	33.75	33.53	35.33	38.28	37.87	25.69	37.22	35.07	35.21	29.86	28.04	29.42	18.9	19.84	20.06	44.31
BnaA01G0152300ZS	0.42	0.46	0.36	2.65	2.79	2.71	10.9	8.99	9.15	8.3	8.62	7.83	0.36	0.37	0.77	4.72	4.05	3.03	9.21	7.56	8.82	9.41	9.25	11.78	0.54	0.58	0.25	2.84	2.75	2.72	4.23	4.93	5.3	4.81	5.04	4.54	0.32	0.32	0.51	3.12	4.33	2.53	5.4	5.07	5.56	9.29	9.16	8.9	0.51
BnaA01G0152400ZS	0	0	0	0	0.09	0.12	0	0	0	0	0	0	0	0.23	0.04	0.63	0.59	0.34	0	0	0	0	0	0	0	0	0	0.42	0.72	0.31	0	0	0	0	0	0	0.19	0	0.35	0.52	1.06	0.08	0	0.08	0	0	0	0	0
BnaA01G0152500ZS	3.93	4.41	2.96	2.35	2.99	4.04	3.04	4.59	5.16	4	4.47	5.23	2.57	4.62	4.46	4.15	3.41	3.63	3.18	3.74	2.67	5.75	4.6	3.52	5.22	2.76	3.28	5.43	4.91	5.6	3.75	3.27	2.53	4.3	2.48	3.75	2.5	3.21	4.93	4.72	6.43	5.03	3.1	3.92	4.27	3.14	3.68	3.38	4.86
BnaA01G0152600ZS	0	0	0	0	0	0	0	0	0	0	0	0	0	0	0	0	0	0	0	0	0	0	0	0.04	0	0	0	0	0	0	0	0	0	0	0	0.25	0	0	0	0	0	0	0	0	0	0	0	0	0
BnaA01G0152700ZS	0	0	0	0	0	0	0	0	0	0	0	0	0	0	0	0	0	0	0	0	0	0	0	0	0	0	0	0	0	0	0	0	0	0	0	0	0	0	0	0	0	0	0	0	0	0	0	0	0
BnaA01G0152800ZS	0	0	0	0	0	0	0	0	0	0	0	0	0	0	0	0	0	0	0	0	0	0	0	0	0	0	0	0	0	0	0	0	0	0	0	0	0	0	0	0	0	0	0	0	0	0	0	0	0
BnaA01G0152900ZS	0	0	0	0	0	0	0	0	0	0	0	0	0	0	0	0.15	0	0	0	0	0	0.05	0.29	0	0	0	0	0	0	0	0.09	0.24	0.1	0	0	0.07	3.42	2.51	4.51	1.04	0.01	0.34	0.09	0	0	0	0	0.12	0.6
BnaA01G0153000ZS	0	0	0	0	0	0	0	0	0	0	0.06	0	0.06	0.05	0.12	0	0	0	0	0	0	0	0	0	0	0	0	0	0	0	0	0	0	0	0	0	0	0	0	0	0	0	0	0	0	0	0	0	0.06
BnaA01G0153100ZS	0.44	0.52	0.54	0.34	0.35	0.58	0.4	0.21	0.32	0.31	0.22	0.19	1.31	0.96	1.11	1.15	0.97	0.68	0.29	0.63	0.43	0.24	0.17	0.17	0.24	0.3	0.37	0.52	0.25	0.23	0.24	0.41	0.28	0.34	0.24	0.17	1.04	0.7	0.7	0.23	0.41	0.19	0.47	0.4	0.32	0.71	0.56	0.59	0.42
BnaA01G0153200ZS	0.04	0.18	0	0	0	0	0.25	0.22	0.08	0.38	0.65	0.35	0.86	0.48	0.27	0.14	0.08	0.14	0	0.04	0	0.14	0.08	0.1	2.2	3.4	2.54	1.98	1.77	1.53	1.11	0.89	0.31	0.62	0.58	0.28	3.71	3.05	2.25	1.38	1.24	0.97	0.21	0.24	0.5	0.51	0.95	0.84	0.05
BnaA01G0153300ZS	0	0.13	0	0	0	0	0	0	0	0	0	0	0	0	0	0	0	0	0	0	0	0	0	0	0	0	0	0	0	0	0	0	0	0	0	0	0	0	0	0	0	0	0	0	0	0	0.17	0.18	0
BnaA01G0153400ZS	20.39	21.58	17.23	1.08	0.68	2.06	1.4	1.89	2.6	1.36	1.21	2	30.26	27.75	23.01	2.6	2.73	2.71	2.7	3.14	2.55	2.98	1.88	2.68	30.74	33.15	32.4	2.01	2.19	1.53	2.85	3.02	2.41	1.41	2.26	1.5	23.75	25.61	20.73	0.86	0.62	1.03	1.33	1.95	1.39	3.49	2.73	3.29	16.91
BnaA01G0153500ZS	0	0.02	0.04	0.14	0.05	0	0.02	0.02	0.09	0.04	0.07	0.02	0.05	0.04	0	0	0	0.02	0.06	0	0	0.06	0.12	0.28	0.05	0.11	0.05	0.09	0.05	0.05	0	0.02	0.03	0.04	0.13	0	0.05	0.05	0.07	0.05	0.13	0	0	0.02	0.05	0.08	0	0	0.05
BnaA01G0153600ZS	0	0	0	0	0	0	0	0.02	0	0	0.04	0	2.98	3.51	3.58	0.02	0	0	0	0	0	0	0	0	0.02	0.11	0.02	0	0	0	0	0	0	0	0.05	0	0.87	0.65	0.49	0.04	0.02	0	0	0	0	0.02	0	0	2.1
BnaA01G0153700ZS	0.37	0.47	0.76	0.15	0.15	0.11	0.79	0.57	0.31	0.94	1.62	1.4	2.52	2.71	2.35	0.32	0.53	0.09	0.26	0.36	0.46	1.21	0.83	0.72	0.29	0.32	0.72	0.15	0.2	0.05	0.51	0.4	0.6	1.17	1.08	1.3	1.31	0.97	0.74	0.27	0.09	0.1	0.2	0.37	0.29	1.02	1.06	0.85	1.7
BnaA01G0153800ZS	0.33	0.53	0.53	0.56	1.03	0.53	0.12	0.31	0.72	0	0	0.06	0.38	0.34	0.16	0.37	0.11	0.27	0.25	0.19	0.57	0.03	0.03	0.06	0.53	0.29	0.2	0.51	0.32	0.25	0.32	0.2	0.05	0	0	0	0.58	0.53	0.2	0.31	0.18	0.37	0.35	0.38	0.4	0	0.04	0	0.89
BnaA01G0153900ZS	5.21	5.68	5.94	3.37	4.16	4.09	3.21	2.62	2.59	3.28	3.22	3.63	6.22	6.08	5.63	3.53	4.11	3.72	2.55	2.02	1.9	2.47	3.34	2.84	4.41	4.05	3.7	3.43	3.39	3.17	1.74	1.87	1.53	1.83	1.74	2.39	3.59	3.8	3	3.39	2.72	2.39	1.65	1.76	1.45	1.25	1.12	1.14	5.55
BnaA01G0154000ZS	6.93	6.55	6.97	6.96	8.63	7.27	7.34	5.32	6.23	7.14	8.57	8.39	9.01	7.23	10.39	10.57	9.21	11.08	7.9	5.99	6.89	6.39	7.05	7.46	8.04	6.88	8.09	6.63	6.17	6.62	5.75	6.04	3.13	6.45	6.99	5.07	6.55	8.75	7.61	5.66	6.46	6.07	6.47	5.08	5.16	4.75	6.05	6.69	6.45
BnaA01G0154100ZS	6.15	5.27	6.3	6.72	6.51	7.39	9.15	8.47	8.42	5.35	5.57	6.08	8.74	8.23	8.77	8.42	9.52	10.92	7.38	5.84	8.08	7.05	6.27	6.73	10.24	8.77	8.21	8.49	8.84	8.05	10.48	11.24	13.81	7.97	9.16	8.52	8.74	7.53	8.39	7.31	7.09	7.45	7.62	5.88	5.62	28.07	27.42	27.01	4.61
BnaA01G0154200ZS	6.42	7.06	6.27	0.06	0.06	0.06	0.78	0.92	0.83	0.94	1.22	1.01	1.33	0.75	0.78	0.05	0.27	0.21	0.24	0.33	0.36	0.68	0.43	0.99	0	0.03	0.28	0.12	0.19	0	0.85	0.45	0.49	0.32	0.07	0.2	0	0.18	0	0.09	0	0	0.2	0.24	0.07	0	0.07	0.04	1.36
BnaA01G0154300ZS	1.23	0.89	0.7	1.34	0.71	0.94	0.74	0.3	0.3	0.09	0.1	0.2	1.7	1.63	0.67	1.06	1.25	1.23	0.52	0.92	0.34	0.04	0.22	0.11	0.86	0.58	0.69	0.99	0.96	0.64	0.1	0.3	0.34	0.1	0.21	0.26	0.67	1.15	0.82	0.36	0.37	0.28	0.24	0.38	0.17	0.64	0.11	0.17	1.36
BnaA01G0154400ZS	0	0	0	0	0	0	0	0	0	0	0	0	0	0	0	0	0.02	0	0	0	0	0	0	0	0	0.02	0	0	0	0	0	0	0	0	0	0	0	0	0	0	0	0	0	0	0	0	0	0	0
BnaA01G0154500ZS	0	0	0	0	0	0	0	0	0	0	0	0	0	0	0	0	0	0	0	0	0	0	0	0	0	0	0	0	0	0	0	0	0	0	0	0	0	0	0	0	0	0	0	0	0	0	0	0	0
BnaA01G0154600ZS	11.88	11.47	10.56	2.29	1.94	2.14	2.82	2.76	2.78	2.11	1.91	2.21	15.56	15.5	15.43	2.16	2.2	2.13	2.23	1.7	1.96	1.46	1.22	1.4	15.08	14.76	16.24	1.6	1.93	1.9	2.25	2.11	1.99	1.76	1.68	2.07	11.25	11.31	11.77	1.03	1.25	1.25	1.64	1.37	1.51	2.35	1.93	1.63	15.95
BnaA01G0154700ZS	9.32	7.58	8.73	2.13	2.72	1.56	4.48	4.76	4.76	3.36	4.27	4.87	10.81	8.48	7.25	3.89	3.38	4.55	4.08	4.49	3.97	4.29	3.98	4.14	6.27	5.59	5.8	3.49	4.42	3.83	4.85	3.43	4.8	7.78	7.01	7.08	7.75	8.57	8.68	3.32	3.66	2.94	2.46	2.22	3.25	7.31	7.79	6.75	7.1
BnaA01G0154800ZS	0.1	0.12	0.24	10.97	9.92	9.45	30.81	27.66	26.82	18.33	17.09	20.1	0.68	0.73	0.87	22.12	21.96	19.67	31.22	29.97	34.81	24.62	21.91	27.25	0.59	0.47	0.43	14.12	14.4	12.61	24.6	25.87	27.56	12.03	12.37	11.43	0.84	0.7	1.04	14.62	15.97	13.45	26.44	24.96	23.75	17.6	16.09	17.07	0.12
BnaA01G0154900ZS	0	0.03	0	0.05	0.09	0	0	0	0.15	0	0.15	0.05	0	0	0	0.03	0	0	0	0.03	0.12	0	0	0.12	0.03	0	0	0.18	0.06	0	0	0	0.11	0.18	0.2	0.1	0	0	0	0.06	0	0.03	0.06	0	0	0.13	0.24	0.22	0
BnaA01G0155000ZS	0	0	0	0	0	0	0	0	0	0	0	0	0	0	0	0	0	0	0	0	0	0	0	0	0	0	0	0	0	0	0	0	0	0	0	0	0	0	0	0	0	0	0	0	0	0	0	0	0
BnaA01G0155100ZS	0.01	0	0.01	0	0	0	0	0	0	0	0	0	0.02	0	0	0.03	0	0.07	0	0	0	0	0	0	0	0.01	0	0.01	0.06	0	0	0.01	0	0	0	0.03	0.01	0	0.03	0.01	0.05	0	0.01	0	0.01	0	0	0	0.04
BnaA01G0155200ZS	0	0.04	0.04	0.15	0.15	0.05	0.04	0.05	0.07	0.05	0.04	0.03	0.1	0.06	0.12	0.25	0.18	0.35	0.15	0.08	0.04	0.03	0.01	0	0.14	0.07	0.09	0.02	0.03	0.01	0.01	0.02	0.03	0.01	0.01	0.02	0.03	0.06	0.05	0	0.08	0.08	0.02	0.09	0.03	0.04	0.09	0.15	0.01
BnaA01G0155300ZS	0	0	0	0	0	0	0	0	0	0	0	0	0	0	0	0	0	0	0	0	0	0	0	0	0	0	0	0	0	0	0	0	0	0	0	0	0	0	0	0	0	0	0	0	0	0	0	0	0
BnaA01G0155400ZS	0	0	0	0.08	0	0	0.26	0.4	0.08	0.06	0.09	0.45	0	0	0	0.13	0.26	0.06	0.13	0.23	0.06	0.45	0.25	0.59	0	0.06	0	0.03	0	0	0.33	0.35	0.09	0.75	0.35	0.17	0	0	0.03	0.12	0.03	0	0.06	0	0.2	2.28	1.55	2.03	0
BnaA01G0155500ZS	2.02	1.78	2.13	1.35	1.37	1.84	1.07	2.21	1.8	1.13	0.53	0.87	6.13	4.43	3.76	2.16	2.06	2.31	0.94	0.68	1.3	0.9	0.53	0.8	2.01	2.6	3.18	0.92	1.18	1.39	1.19	1.12	1.33	0.85	0.27	0.61	3.26	3.19	2.58	0.68	1.12	1.31	0.43	0.68	0.88	4.73	4.18	3.82	1.3
BnaA01G0155600ZS	0	0	0	0	0	0	0	0	0	0	0	0	0	0	0	0	0	0	0	0	0	0	0	0	0	0	0	0	0	0	0	0	0	0	0	0	0	0	0	0	0	0	0	0	0	0	0	0	0
BnaA01G0155700ZS	0	0	0	0	0	0	0	0	0	0	0	0	0	0	0	0	0	0	0	0	0	0	0	0	0	0	0	0	0	0	0	0	0	0	0	0	0	0	0	0	0	0	0	0	0	0	0	0	0
BnaA01G0155800ZS	0	0.02	0	0	0.02	0.01	0	0.01	0	0	0.03	0	0	0.02	0.1	0.02	0.02	0.02	0	0	0	0	0.04	0.03	0.07	0.04	0.07	0.02	0.04	0.03	0	0	0	0.04	0	0.09	0.02	0	0	0	0	0.02	0	0.02	0	0	0.01	0	0.01
BnaA01G0155900ZS	13.17	14.41	12.84	13.98	14.19	15.19	9.57	8.94	9.25	8.93	9.13	9.3	15.98	14.88	15.1	16.5	15.89	14.09	10.01	9.97	9.37	8.84	9.17	7.44	14.42	13.6	14.21	9.79	10.34	9.42	6.68	5.9	5.91	6.68	7.9	6.14	12.03	12.15	13.72	9.77	9.99	9.79	6.83	6.06	5.7	6.17	6.41	5.37	9.33
BnaA01G0156000ZS	4.72	5.25	5.24	4.42	5.24	5.17	6.37	5.86	6.46	4.23	3.51	3.06	5.61	6.47	6.3	7.99	8.99	6.41	6.28	6.68	6.09	4.75	5.1	4.49	4.45	3.68	3.61	5.4	5.53	5.78	5.67	5.89	4.67	2.8	3.06	2.1	4.32	4.43	5.89	5.07	5.66	5.15	4.92	4.92	5.14	3.55	5.42	4.65	2.24
BnaA01G0156100ZS	0	0	0	0	0	0	0	0	0	0	0.19	0	0	0	0	0	0	0	0	0	0	0	0	0	0	0	0	0	0	0	0	0	0	0	0.08	0.13	0	0	0	0	0	0	0	0	0	0	0.02	0	0
BnaA01G0156200ZS	0	0.27	0	0	0.62	0	0	0.43	0.24	0.35	0.49	0	0	0	0	0	0	0	0.25	0	0	0	0	0	0	0.37	0.2	0	0.5	0	0.3	0.04	0.18	0	0	0	0	0	0	0	0.88	0	0	0	0.14	1.16	0.46	1.02	0
BnaA01G0156300ZS	0.72	0.15	0	2.26	1.81	1.98	2.57	1.29	0.98	2.08	2.35	2.79	0.92	0.23	0.37	2.15	1.88	1.44	2.12	2.45	2.83	2.48	2.67	0.87	1.51	1.65	1.14	0.85	0.1	0.86	1.69	3.14	2.87	2.9	2.46	3.27	0.49	0.98	1.07	1.7	1.39	1.07	2.53	1.95	2.4	6.27	7.94	3.76	0.55
BnaA01G0156400ZS	15.39	13.39	14.94	11.08	9.57	10.97	4.13	2.93	3.04	0.93	1.02	1.53	18.63	15.48	15.61	16.39	13.49	13.78	9.54	6.88	7.54	1.15	0.87	1.25	14.51	13.74	14.54	6.43	7.2	6.05	1.61	2.67	2.94	2.09	3.49	2.55	17.84	15.73	20.54	6.14	7.24	6.28	4.47	4.26	4.05	1.75	2.64	2.9	7.08
BnaA01G0156500ZS	0.78	0.73	0.47	4.63	3.98	3.8	1.89	1.7	2.53	2.05	1.79	1.57	0.48	0.18	0.34	5.16	5.48	5.22	2.76	2.65	3.25	1.65	1.36	2.08	0.38	0.34	0.68	1.28	1.88	2.52	1.51	1.13	1.7	9.68	11.3	12.3	0.68	0.52	0.45	2.79	2.55	2.17	2.32	1.99	2.01	5.89	4.82	5.2	0.38
BnaA01G0156600ZS	0	0	0	0.7	0.41	0.3	0.4	0.4	0.39	1.24	1.18	1.63	0.05	0.04	0	0.47	0.44	0.48	0.44	0.25	0.29	1.87	2.22	1.58	0	0	0.03	0.35	0.51	0.35	0.91	0.76	1.02	4.15	3.69	4.45	0	0.05	0.03	0.49	0.23	0.36	0.15	0.02	0.2	3.63	4.66	4.57	0
BnaA01G0156700ZS	0.36	0	0	0	0.76	0.21	0.12	0.07	0.34	1.22	1.21	0	3.05	1.62	0.29	1.49	0.2	1.07	0	0.52	0.88	0.68	0.04	0	0.75	0.75	0	0.84	0.2	1.21	1.48	1.94	0.26	0.58	0.37	0.79	1.72	1.33	0	0.13	0.03	0.53	0	0.27	0.2	0	0.51	1.39	0.39
BnaA01G0156800ZS	15.5	14.53	14.4	0.83	1.33	0.87	0.03	0.08	0.18	0.02	0.01	0.07	5.82	6.77	7.02	0	0.66	1.15	0.37	0.26	0.19	0.05	0.05	0	3.59	6.1	6.31	0.6	0.19	0	0.19	0.31	0	0.08	0.26	0	6.17	3.15	6.96	0.74	0.18	0.52	0.21	0.41	0.34	0.26	0.27	0.09	7.69
BnaA01G0156900ZS	0.07	0.23	0.26	0.1	0.16	0.09	0	0.12	0.03	0	0.06	0	0.15	0.26	0.06	0.08	0.12	0.31	0.07	0.06	0.33	0.15	0.03	0.07	0	0.03	0.18	0.06	0	0.06	0.06	0.03	0.03	0.09	0	0	0.13	0.09	0.27	0.1	0.11	0.06	0.03	0.06	0.2	0.1	0	0.1	0.1
BnaA01G0157000ZS	0.99	0.72	0.58	0.42	0.72	0.48	1.09	0.75	0.76	0.53	0.81	0.97	0.69	0.43	0.7	0.36	0.89	0.33	0.68	0.66	1.1	0.92	0.78	1.66	0.24	0.53	0.53	0.46	1.01	0.61	0.92	0.99	1.23	1.39	1.73	1.13	0.56	0.62	0.8	0.66	0.59	1.15	1.19	0.48	0.61	1	0.54	0.79	0.27
BnaA01G0157100ZS	0	0	0	0	0.02	0	0.05	0	0	0	0	0.04	0.05	0	0	0	0	0	0	0.03	0	0.07	0	0	0	0	0	0	0.04	0.03	0.05	0.08	0.07	0	0	0.08	0	0	0	0	0	0.03	0	0	0	0.07	0.03	0.06	0.09
BnaA01G0157200ZS	2.21	3.62	3.12	2.51	2.29	4.01	1.53	1.39	1.24	1.13	2.46	0.33	3.38	3.22	2.46	2.88	1.33	1.86	1.66	1.54	1.06	0.91	0.95	1.66	2.19	3.67	3.05	1.77	2.31	1.81	0.51	1.18	1.25	1.69	1.18	1.15	1.76	3.19	2.44	1.35	2.55	1.89	1.36	1.33	0.68	1.17	0.32	1.72	3.74
BnaA01G0157300ZS	0	0	0	0	0	0	0	0	0	0	0	0	0	0	0	0	0	0	0	0	0	0	0	0	0	0	0.18	0	0	0	0	0	0	0	0	0	0	0	0	0	0	0	0	0	0	0	0	0	0
BnaA01G0157400ZS	9.65	12.83	15.03	0	0.34	0.13	0.77	0	0	0	0.8	0	9.08	7.74	10.55	3.46	4.19	3.09	1.07	1.13	0.74	0	0.03	0	7.22	6.49	5.86	0.53	0.5	0	0	0.28	0.5	1.16	0.59	0.02	3.28	4.17	5.96	0.24	0	0.14	1.07	0.49	1.07	2.18	2.64	2.62	14.19
BnaA01G0157500ZS	0	0	0	0	0	0	0	0	0	0	0	0	0	0	0	0	0	0	0	0	0	0	0	0	0	0	0	0	0	0	0	0	0	0	0	0	0	0	0	0	0	0	0	0	0	0	0.07	0	0
BnaA01G0157600ZS	0.07	0.33	0.29	1.07	1.7	1.25	0.86	0.7	0.79	1.99	1.73	1.22	0.95	0.67	0.41	1.39	2.75	2.24	1.39	1.83	2.34	1.37	1.5	1.36	1.58	1.65	1.64	1.36	3	1.46	1.15	1.43	1.42	0.47	0.96	0.39	1.05	2.32	1.61	1.6	1.77	1.86	0.16	0.97	0.61	1.1	0.67	1.54	0.34
BnaA01G0157700ZS	4.42	6.32	5.34	0	0	0	0	0	0	0	0	0.03	2.5	2.46	2.05	0	0.07	0	0	0	0	0	0	0	1.94	1.94	2.39	0.25	0.4	0.23	0.04	0.14	0.04	0.03	0.08	0	1.51	1.5	2.28	0	0	0.07	0.4	0.35	0.16	0	0	0	8.36
BnaA01G0157800ZS	0	0	0	0	0	0	0	0	0	0	0	0	0	0	0	0	0	0	0	0	0	0	0	0	0	0	0	0	0	0	0	0	0	0	0	0	0	0	0	0	0	0	0	0	0	0	0	0	0
BnaA01G0157900ZS	10.36	10.43	10.37	10.39	10.38	9.77	7.28	5.83	6.05	7.36	5.76	5.98	13.72	13.1	12.54	12.28	12.15	11.49	6.86	6.6	6.23	4.43	5.5	5.66	11.83	10.46	12.32	7.65	6.57	6.77	6.64	6.44	6.65	7.66	5.95	6.74	9.74	9.65	10.33	6.83	6.44	5.89	4.45	4.57	4.28	6.08	6.73	6.99	8.34
BnaA01G0158000ZS	0	0	0	0	0	0	0	0	0	0	0	0	0	0	0	0	0	0	0	0	0	0	0	0	0	0	0	0.59	0	0.64	0	0	0	0	0	0	0	0	0	0	0	0	0	0	0	0	0	0	0
BnaA01G0158100ZS	0	0	0	0	0	0	0	0	0	0	0	0	0	0	0	0	0	0	0	0	0	0	0	0	0	0	0	0	0	0	0	0	0	0	0	0	0	0	0	0	0	0	0	0	0	0	0	0	0
BnaA01G0158200ZS	2.03	1.38	1.38	0.83	1.31	0.51	0.29	0.47	1.15	0	0.48	0.52	0	0.93	0.29	0.57	0.21	0.31	0.31	0.32	0	0.59	0.29	0.46	0.67	1.39	0.96	0.64	0.86	0.75	0	0.35	0.17	0.48	0.24	0.77	0.32	0.77	0.31	0.72	0.56	0.55	0.15	0.22	0.3	0.24	0.32	0	0.27
BnaA01G0158300ZS	0.77	0.9	1.18	0.65	1.34	1.21	0.88	0.71	0.79	0.6	1.15	0.53	1.11	1.23	1.13	1.58	1.47	2.42	0.98	0.7	0.99	0.73	0.4	0.44	0.85	1	1.07	0.99	1.2	0.86	0.66	0.84	0.87	2.02	2.33	1.52	0.96	0.91	1.36	0.25	0.31	0.28	0.89	0.68	0.83	2.3	2.37	2.43	1.12
BnaA01G0158400ZS	0.36	0.51	0.42	0.33	0.53	0.35	0.37	0.92	0.29	0.34	0.62	0.31	2.14	2.15	2.25	1.44	0.86	1.41	0.82	0.89	1.02	0.53	0.42	0.21	0.27	0.48	0.21	0.78	0.4	0.77	0.3	0.49	0.33	0.39	0.34	0.55	0.41	0.4	0.57	0.93	0.86	0.89	0.75	0.67	0.89	2.03	1.41	1.86	0.36
BnaA01G0158500ZS	12.08	12.27	12.76	11.03	11.32	9.97	9.77	11.7	11.67	10.75	8.5	13.27	11.17	16.18	14.65	12.73	11.78	11.46	9.99	11.55	11.78	14.49	15.02	16.51	11.66	12.82	13.2	11.49	14.05	9.92	9.59	8.91	8.94	8.95	8.61	8.89	12.36	13.06	10.6	11.55	14.21	11.89	9.71	7.9	8.61	7.9	8.25	7.45	15.25
BnaA01G0158600ZS	2.21	1.23	0	12.47	10.33	11.94	1.84	1.96	1.43	0	0	0.31	1.46	2.69	0.77	9.67	11.82	12.33	4.38	7.46	6.49	2.03	0.64	3.04	1.79	1.04	1.16	9.97	6.75	10.36	0.38	1.85	1.55	0.85	0	1.16	1.57	2.5	1.53	8.72	8.92	3.97	2.34	3.92	6.47	0.79	0.4	1.82	1.2
BnaA01G0158700ZS	3.64	1.83	3.34	2.82	2.33	1.6	3.05	1.51	0.72	2.61	1.67	0.82	3.84	2.98	2.4	1.84	1.35	4.29	1.03	2.33	2.46	1.14	2.63	1.7	2.53	2.91	2.99	2.96	1.7	3	0.79	0.88	2.27	2.03	1.49	2.25	2.82	4.14	2.57	1.56	2	1.19	1.31	0.5	1.18	1.01	2.27	1.55	2.43
BnaA01G0158800ZS	0	0	0	0	0	0	0	0	0	0	0	0	0	0	0	0	0	0	0	0	0	0	0	0	0	0	0	0	0	0	0.03	0	0	0	0	0	0	0	0	0	0	0	0	0	0	0	0	0	0
BnaA01G0158900ZS	2.2	1.63	2.18	2.62	2.39	3.07	2.73	2.5	2.95	2.38	2.6	2.63	2.61	2.13	2.29	3.41	2.14	2.38	1.9	1.75	1.82	1.62	1.54	1.56	1.6	1.59	1.36	1.54	1.99	1.91	1.62	2.09	1.91	2.19	2.34	2.35	1.63	1.28	1.46	1.09	0.53	0.76	1.23	1.45	1.25	1.76	1.91	1.79	1.97
BnaA01G0159000ZS	1.69	1.32	1.07	1.37	1.38	1.21	0.78	1.37	1.24	1.02	1.21	1.26	1.54	1.48	1.36	1.11	1.27	1.54	1.22	1.07	1.5	1.56	1.19	1.55	0.99	1.11	0.93	1.33	0.91	0.92	1.18	1.07	1.1	1.5	2.34	1.45	0.9	1.13	0.76	0.79	1.06	1.16	0.78	0.51	0.82	1.13	1.26	1.33	0.88
BnaA01G0159100ZS	0	0	0	0	0	0	0	0	0	0	0	0	0	0	0	0.18	0.1	0.27	0	0	0.1	0	0	0	0	0.05	0	0	0.05	0.06	0.05	0	0	0	0	0	0	0	0	0	0	0	0.05	0	0.12	0	0	0	0
BnaA01G0159200ZS	6.18	5.16	6.63	16.63	17.47	18.51	12.7	13.8	14.46	17.54	18.67	16.61	9.3	8.54	9.34	20.02	17.24	19.13	14.1	15.43	13.45	12.55	10.33	10.91	11.39	9.81	10.29	4.35	7.48	6.06	13.13	12.63	12.8	28.67	30.4	28.19	8.22	9.6	8.77	7.38	8.97	6.84	10.68	8.6	9.53	25.97	27.74	26.36	7.26
BnaA01G0159300ZS	0	0	0	0	0	0	0	0	0	0	0	0	0	0	0	0	0	0	0	0	0	0	0	0	0	0	0	0	0	0	0	0	0	0	0	0	0	0	0	0	0	0	0	0	0	0	0	0	0
BnaA01G0159400ZS	7.27	6.45	7.27	5.93	5.03	6.32	3.56	3.87	2.46	4.08	4.58	4.29	7.84	6.85	5.42	4.13	2.99	3.73	1.72	2.73	1.87	2.11	1.64	2.18	5.84	5.47	5.94	5.07	6.01	6.33	3.55	2.76	3.46	3.86	5.32	2.17	3.41	3.47	3.96	3.68	3.65	3.39	1.39	1.08	1.61	4.23	3.85	2.98	6.08
BnaA01G0159500ZS	4.87	5.78	5.14	3.79	4.39	3.88	3.52	3.8	2.01	2.07	1.63	1.71	5.75	4.56	5.57	3.81	4.86	5.09	3.48	3.09	3.3	1.78	1.88	1.72	4.14	5.78	5.45	2.67	3.36	1.97	2.61	1.84	1.77	0.71	0.67	1.25	4.32	3.32	3.67	2.46	2.65	2.38	2.09	1.57	1.78	0.91	1.2	1.27	5.05
BnaA01G0159600ZS	3.39	3.88	4.31	1.13	0.77	1.02	0.46	0.96	0.97	0.48	1.18	0.62	2.88	4.09	3.21	0.97	1.2	1.21	0.63	0.55	0.72	0.73	0.64	1.21	2.3	2.53	2.53	0.82	1.17	0.83	1.18	0.99	0.91	1.16	1.16	0.51	1.39	0.81	0.75	0.45	0.23	1.13	0.78	0.36	0.87	0.39	0.67	0.44	4.5
BnaA01G0159700ZS	0.04	0.03	0.05	1.8	1.54	1.41	0.38	0.31	0.38	0.3	0.39	0.4	0.28	0.17	0.2	0.98	1.04	0.91	0.43	0.4	0.34	0.37	0.33	0.36	0.13	0.28	0.15	0.87	1.18	0.99	0.34	0.18	0.34	0.43	0.31	0.41	0.19	0.32	0.51	0.48	0.42	0.37	0.22	0.27	0.15	0.4	0.28	0.31	0.06
BnaA01G0159800ZS	17.21	16.78	17.43	10.72	12.97	10.83	10.4	11.07	10.71	8.23	8.74	8.04	15.89	15	17.59	10.64	14.26	9.83	7.21	9.25	8.92	9.98	7.58	9.09	13.68	13.35	12.7	15.82	14.26	14.77	9.48	10.54	10.72	7.39	6.65	5.44	12.8	10.03	12.86	8.54	8.62	9.02	6.2	6.8	6.05	5.38	5.19	5.4	14.3
BnaA01G0159900ZS	0	0	0	0	0	0	0	0	0	0	0	0	0	0	0	0	0	0	0	0	0	0	0	0	0	0	0	0	0	0	0	0	0	0	0	0.18	0	0	0	0	0	0	0.09	0	0	0	0	0	0
BnaA01G0160000ZS	0	0	0	0	0	0	0	0	0	0	0.32	0.13	0	0	0	0	0	0	0	0	0	0	0	0	0	0	0	0	0	0	0	0	0	0	0	0	0	0	0	0	0	0	0.26	0	0	0	0	0	0
BnaA01G0160100ZS	4.34	2.46	2.33	0.39	0.17	0.5	0	0.07	0.23	0.06	0.03	0	0.71	0.84	0.75	0.29	0.2	0.24	0.16	0	0	0	0	0	2.29	1.64	1.01	0.16	0.15	0	0.11	0.1	0.08	0	0.11	0	0.52	0.23	0.68	0	0	0.13	0.1	0.03	0.18	0	0	0	1.17
BnaA01G0160200ZS	153.51	158.59	154.18	24.65	24.87	25.16	6.35	7.98	7.33	7.9	7.59	8.24	73.11	78.09	73.84	14.28	14.3	14.33	8.74	8.18	7.03	11.95	13.33	11.34	119.71	113.67	117.24	14.68	14.74	14	4.88	5.51	5.4	6.39	7.22	6.44	60.64	59.79	62.68	10.44	9.34	10.15	4.58	4.56	4.16	6.74	7.5	7.91	108.44
BnaA01G0160300ZS	1.24	1.42	1.53	1.84	1.82	1.31	1.15	1.07	1.34	2.12	2.15	2.56	3.54	3.75	3.51	2.43	1.98	2.27	1.49	1.76	1.92	4.14	4.88	3.82	1.87	1.78	1.86	1.22	1.37	1.48	1.13	0.75	0.63	2.55	2.09	1.69	2.47	2.83	2.86	1.89	2.05	2.25	1.2	0.83	0.83	3.28	3.38	3.74	1.7
BnaA01G0160400ZS	1.13	0.85	0.88	1.7	1.8	1.86	1.63	1.58	1.64	0.67	0.75	1.33	4.06	4.28	3.08	7.36	7.76	6.72	5.15	6.53	6.12	3.56	3.86	3.77	1.15	0.75	1.01	2.09	1.9	1.97	1.08	0.89	0.99	0.94	1.73	0.88	2.64	3.23	2.26	5.42	4.92	5.47	4.75	4.61	4.79	4.68	4.48	5.63	1.5
BnaA01G0160500ZS	5.03	5.29	5.85	5.12	5.66	6.45	5.96	5.74	6.71	6.81	6	5.22	3.86	3.88	4.08	4.22	4.48	3.08	3.52	3	4.23	5.7	4.95	4.62	5.1	5.42	4.69	8.13	7.17	8.98	6.76	7.14	6.46	7.46	7.93	6.58	4.63	4.59	3.74	3.33	4.84	5.22	3.67	3.01	3.85	3.55	2.88	2.08	6.54
BnaA01G0160600ZS	1.08	1.19	0.94	1.65	1.3	1.36	1.42	1.48	1.08	0.69	0.57	0.83	1.22	1.2	1.13	2.13	1.89	2.23	1.53	1.68	1.45	1.09	0.83	0.98	1.13	1.22	0.83	1.03	1.17	0.93	1.2	1.16	1.25	0.52	0.85	0.79	1.23	1.23	1.33	1.4	1.56	1.16	1.34	1.39	1.09	1.12	1.31	0.96	1.57
BnaA01G0160700ZS	1.78	1.57	1.67	2.23	2.21	1.82	1.28	1.03	1.37	0	0.9	1.29	2.1	0	2.26	3.63	1.9	4.1	0.18	1.32	0.96	0	0.85	1.01	2.4	2.17	2.35	2.16	2.1	0.25	1.2	1.04	0.86	0.6	0.7	1.04	1.89	2.04	1.54	1.36	1.8	2.06	1.35	0.26	1.31	2.37	1.88	1.86	0.29
BnaA01G0160800ZS	0	0	0	0	0	0	0	0	0	0	0	0	0	0	0	0	0	0	0	0	0	0	0	0	0	0	0	0	0	0	0	0	0	0	0	0	0	0	0	0	0	0	0	0	0	0	0	0	0
BnaA01G0160900ZS	0.37	0.54	0.28	0.05	0.15	0.17	0.11	0.11	0.12	0	0.08	0.02	0.81	0.74	0.66	0.07	0.31	0.15	0.14	0.16	0.02	0.12	0.04	0.14	0.31	0.32	0.32	0.13	0.09	0.09	0.07	0	0.15	0.04	0.11	0.22	0.51	0.41	0.41	0.15	0.21	0.14	0.21	0.16	0.29	0.02	0	0.03	0.69
BnaA01G0161000ZS	3.28	3.94	5.17	3.87	3.43	4.02	3.56	4.05	3.51	3.66	3.33	3.53	4.86	4.72	5.73	7.76	7.82	5.56	4.53	4.53	3.81	3.35	5.6	3.94	4.92	4.67	5.17	5.72	5.85	4.94	1.71	2.01	2.27	3.36	2.42	2.4	5.9	4.76	4.53	6.39	5.43	4.81	3.08	2.94	4.14	2.52	3.46	3.31	4.96
BnaA01G0161100ZS	0.18	0	0	0.32	0	0	0	0	0	0	0	0.32	0	0	0	0	0	0	0	0	0	0	0	0	0	0	0	0	0	0	0	0	0	0	0	0	0	0	0	0	0	0	0	0	0	0	0	0	0.21
BnaA01G0161200ZS	1.53	1.37	1.21	1.69	1.59	1.78	1.36	1.44	1.53	1.66	1.37	1.33	1.64	1.95	2.47	1.71	1.83	2.13	0.86	0.99	1.51	1.32	1.32	1.06	1.01	0.69	1.49	1.67	1.97	1.9	0.8	0.83	1.51	1.13	1.13	0.82	1.16	1.32	0.68	1.41	1.26	1.36	0.59	1.01	0.97	1.25	1.64	1.3	1.1
BnaA01G0161300ZS	0.42	0.65	0.4	1.84	1.54	1.27	6.34	6.34	6.81	5.71	4.65	6.02	2.02	1.81	1.95	7.65	7.72	8.18	14.21	13.27	14.28	16.16	15.94	16.16	0.82	0.63	0.7	2.15	2.04	2.06	5.28	5.32	5.51	6.72	6.78	7.93	2.31	2.78	2.4	7	6.43	6.78	14.82	16.91	16.67	19.52	18.16	18.04	0.76
BnaA01G0161400ZS	1.72	1.43	1.64	2.28	1.25	1.41	1.13	1.22	1	1.21	1.38	1.2	2.05	2.48	2.26	2.93	2.87	3.47	1.82	2.35	2.15	2.21	2.02	2.47	1.55	1.7	1.45	1.57	1.32	1.34	0.93	0.96	1.19	1.43	1.31	1.48	2.65	2.47	2.75	2.4	2.32	2.44	1.87	2.04	1.65	2.45	2.33	2.6	1.66
BnaA01G0161500ZS	6.32	7.47	8.55	59.58	61.57	66.08	1061.52	992.63	1030.44	807.99	803.76	822.44	16.45	15.31	11.91	143.2	146.57	131.91	891.23	819.81	877.52	1144.1	1019.84	1001.01	7.19	4.85	4.18	71.59	62.69	71.35	1329.95	1358.49	1369.49	1241.18	1280.75	1225.06	10.73	11.12	13.18	116.37	149.18	128.09	827.14	762.4	742.53	1463.93	1477.72	1455.55	8.02
BnaA01G0161600ZS	5.51	5.33	6.24	5.55	4.54	3.71	4.26	3.79	3.28	4.02	4.13	4.62	6.64	6.98	8.56	7.73	6.66	5.83	3.97	4.17	3.69	4.2	5.12	6.75	7.27	5.97	5.52	6.34	5.69	5.07	5.48	5.41	5.82	4.77	5.74	5.34	5.43	6.61	6.26	3.98	6.81	5.39	4.22	4.76	4.8	5.9	5.78	5.49	6.41
BnaA01G0161700ZS	0	0.12	0	0.29	0.49	0.09	0	0	0.03	0	0.03	0	0.53	0.17	0	0	0.37	0.25	0	0.1	0.04	0	0.05	0	0.65	0.64	0	0.16	0	0	0	0	0.04	0.16	0	0	0.27	0.51	0.2	0.26	0.56	0.79	0	0.11	0.09	0.03	0	0	0
BnaA01G0161800ZS	0.05	0.05	0	0.2	0.09	0.14	0.35	0.28	0.12	0.09	0.13	0.08	0.06	0.11	0.08	0.23	0.17	0.3	0.14	0.15	0.25	0.04	0.15	0.06	0.08	0.2	0.03	0.13	0.08	0.03	0.55	0.68	0.64	0.26	0.3	0.16	0.27	0.05	0.03	0.02	0.05	0.12	0.25	0.33	0.35	0.57	0.22	0.32	0
BnaA01G0161900ZS	1.97	1.19	0.75	0.82	0.13	0.44	1.78	1.71	1.5	0	2.06	2.08	1.55	1.22	2.32	0.87	0.59	1.7	0.05	0.72	0.24	2.48	1.92	2.1	2.1	0.43	0.89	2.05	1.55	0.61	0.85	0.57	0.29	2.5	2.79	3.94	1.21	0.96	0.57	0.47	2.03	1.31	0.82	0.98	0.85	0	0	3.18	0.45
BnaA01G0162000ZS	2.18	2.09	2.35	10.59	9.59	9.41	7.81	7.08	6.76	5.23	4.67	5.89	7.02	6.72	6.1	17.27	16.45	19.11	9.3	9.16	7.59	2.11	2.38	1.97	2.19	2.55	2.11	8.36	7.64	7.34	5.52	6.07	5.46	1.68	1.64	1.55	4.01	4.5	4.15	14.06	10.31	11.42	6.74	6.33	6.47	1.98	1.97	2.24	3.09
BnaA01G0162100ZS	0.38	0.5	0.36	0.2	0.38	0.28	0.15	0.26	0.31	0.72	0.97	0.76	0.53	0.33	0.46	0.32	0.25	0.25	0.14	0.19	0.19	1.08	1.02	0.32	0.25	0.13	0.27	0.19	0.38	0.3	0.09	0.14	0.02	0.28	0.22	0.15	0.18	0.2	0.19	0.26	0.11	0.27	0.1	0.15	0.08	0.16	0.17	0.12	0.72
BnaA01G0162200ZS	0	0	0	0	0	0	0	0	0.02	0	0	0.09	0	0	0	0.61	0	0	0.12	0	0	0	0	0	0	0	0	0	0.41	0	0	0.12	0	0	0	0	0	0.7	0.16	0	0.03	0	0	0	0	0	0	0	0
BnaA01G0162300ZS	8.09	9.26	8.91	8.49	8.22	8.8	6.75	7.63	6.3	9.9	10.42	11.39	8.04	9.63	7.37	15.35	11.76	11.66	7.49	8.97	8.44	7.16	7.63	8.89	5.93	6.92	5.31	7.69	7.97	8.15	8.08	6.25	5.66	10.2	9.52	9.64	7.98	8.66	5.78	7.47	5.97	6.29	6.85	7.64	5.44	7.47	6.54	7.57	8.52
BnaA01G0162400ZS	43.62	42.81	44.65	37.03	36.46	37.65	28.54	28.86	29.5	22.18	23.92	26.33	30.44	29.98	32.32	36.03	39.98	32.68	25.25	24.66	23.04	21.48	19.19	18.46	62.4	66.91	65.48	19.3	19.36	18.7	29.4	30.35	33.32	47.96	43.45	44	36.35	34.15	33.29	16.59	15.68	15.31	21.8	21.91	21.16	31.41	35.54	35.86	32.85
BnaA01G0162500ZS	0.21	0.45	0	0.12	0	0	0	0	0	0.1	0	0	0.22	1.28	0.41	0.19	0.65	0.35	0.15	0	0.28	0.13	0	0	0	0	0.62	0	0.54	0	0	0	0	0	0.52	0.18	0	0	0	0	0.36	0	0	0.46	0.29	0.23	0.32	0.79	0
BnaA01G0162600ZS	0	0	0	0	0	0	0	0	0	0	0	0	0	0	0	0	0	0	0	0	0	0	0	0	0	0	0	0	0	0	0	0	0	0	0	0	0	0	0	0	0	0	0	0	0	0	0	0	0
BnaA01G0162700ZS	0	0	0	0	0	0	0	0	0	0	0	0	0	0	0	0	0	0	0	0	0	0	0	0	0	0	0	0	0	0	0	0	0	0	0	0	0	0	0	0	0	0	0	0	0	0	0	0	0
BnaA01G0162800ZS	0	0	0	0	0	0	0	0	0	0.09	0	0	0.1	0	0	0	0.1	0	0.08	0.1	0	0.09	0	0.08	0	0	0	0	0	0	0	0	0.12	0	0	0	0	0	0	0.1	0	0	0	0	0	0	0	0	0
BnaA01G0162900ZS	0	0.12	0.21	0.06	0.04	0	0.18	0	0	0	0.04	0	0.14	0.03	0	0	0	0	0	0.04	0	0	0	0	0	0.03	0.04	0	0.07	0.04	0	0	0.08	0	0	0	0.08	0	0.04	0.22	0	0.07	0	0	0.08	0	0	0	0.04
BnaA01G0163000ZS	0	0.18	0	0	0	0	0	0	0	0	0	0	0	0	0	0.18	0.2	0	0	0	0	0	0	0	0	0	0.11	0	0	0	0	0	0	0	0	0	0.11	0	0	0	0	0	0	0	0	0.23	0	0	0
BnaA01G0163100ZS	0.45	0.33	0.71	0.31	0.32	0.37	0.12	0.28	0.43	0.44	0.5	0.57	0.94	0.82	0.67	0.63	0.82	0.63	0.47	0.44	0.25	0.44	0.49	0.75	0.47	0.33	0.31	0.34	0.31	0.63	0.17	0.28	0.13	0.31	0.47	0.47	0.52	0.23	0.32	0.45	0.54	0.55	0.15	0.13	0.23	0.41	0.32	0.47	0.47
BnaA01G0163200ZS	0.12	0	0	0	0	0	0	0.03	0	0	0	0.05	0.67	0.6	0.26	0.38	0.42	0.38	0.25	0.06	0.43	0	0	0	0	0	0	0	0.13	0.14	0	0	0	0	0.07	0	0	0	0	0	0	0	0	0.06	0.07	0.27	0.07	0	0
BnaA01G0163300ZS	0	0	0	0	0	0	0	0	0	0	0	0	0	0	0	0	0	0	0	0	0	0	0	0	0	0	0	0	0	0	0	0	0	0	0	0	0	0	0	0	0	0	0	0	0	0	0	0	0
BnaA01G0163400ZS	0.46	0	0	0	0.02	0	0.63	0	0	0.56	2.19	0	0	0	0	0	0.35	0	0	0.92	0.38	0	0	0	0	0.76	0	0	1.01	1.51	0	0	0	0	0	1.62	0	0	1.08	0.78	0.75	0.81	0	0	0	0	0	0	0
BnaA01G0163500ZS	0.43	0.55	0.18	0.31	0.14	0.54	0.14	0.23	0.54	1.02	0.51	0.92	0.27	0.49	0.29	0.44	0.67	0.16	0.34	0.09	0.05	0.93	0.81	1.24	0.04	0.39	0.46	0.14	0.47	0	0.14	0.09	0.34	0.49	0.7	0.3	0.19	0.14	0.57	0.14	0.21	0.22	0.09	0.04	0.11	0.65	0.56	0.65	0.3
BnaA01G0163600ZS	1.65	1.55	1.73	2.38	2.07	2.22	0.85	0.99	0.89	4.45	4.29	3.93	1.87	2.1	1.83	1.37	1.98	1.44	0.82	0.84	1.11	3.41	3.3	3.07	1.36	1.69	1.63	1.16	1.14	1.12	0.84	0.92	0.8	3.25	3.19	3.09	1.51	1.48	1.66	1.23	0.78	1.17	0.48	0.52	0.35	1.98	2.37	2.09	2.39
BnaA01G0163700ZS	1.07	1.31	1.04	1.82	1.51	1.84	0.59	0.51	0.77	3.36	3.38	3.11	2.26	1.94	1.32	1.28	1.38	1.54	0.73	0.62	1.01	2.91	2.43	2.37	1.2	0.81	1.18	0.47	0.49	0.45	0.41	0.84	0.8	2.39	2.73	2.91	1.07	1.1	1.06	0.65	0.65	0.66	0.32	0.23	0.21	1.49	2.16	1.95	1.84
BnaA01G0163800ZS	3.73	4.06	3.71	3.74	4.15	4.87	4.1	4.7	4.36	4.71	5.1	4.78	3.9	3.82	3.3	4.72	4.47	4.44	3.37	3.15	3.32	4.52	4.81	4.46	3.8	4.72	3.99	3.68	3.99	5.28	5.21	4.61	5.74	5.93	5.3	6.75	3.49	4.17	4.15	4.22	4.31	4.05	4.56	3.53	4.05	6.15	6.18	5	2.24
BnaA01G0163900ZS	0.04	0	0	0	0	0	0	0	0	0.03	0	0	0.12	0	0	0	0.04	0.02	0	0	0	0	0	0	0	0	0	0	0	0	0	0	0	0	0	0.13	0	0	0	0	0	0	0	0	0	0.1	0.04	0.09	0
BnaA01G0164000ZS	2.24	2.38	2.8	1.53	2.63	2.02	4.15	1.55	3.43	1.98	1.91	2.16	3.94	4.86	4.43	4.24	4.24	4.48	3.61	2.84	4.2	1.64	2.31	1.89	2.01	2.38	2.38	1.77	2.34	2.57	2.5	2.43	2.36	1.81	1.5	1.78	2.52	2.4	2.97	1.69	2.08	1.67	2.84	2.86	1.94	3.08	2.85	2.9	1.13
BnaA01G0164100ZS	4.28	3.31	4.32	3.65	3.71	4.38	1.64	0.73	1.44	0.66	0.89	0.43	4.63	5.13	4.05	4.05	3.28	3.78	2.73	2.81	2.81	1.44	1.68	1.13	3.77	3.42	3.77	3.1	3.54	2.71	0.89	1.67	1.3	0.27	0.34	1.17	2.73	2.82	3.39	2.69	2.27	2.42	1.93	1.99	1.97	2.3	2.4	1.91	2.77
BnaA01G0164200ZS	0	0	0	0	0	0	0	0	0	0	0	0	0	0	0	0	0	0	0	0	0	0	0	0	0	0	0	0	0	0	0	0	0	0	0	0	0	0	0	0	0	0	0	0	0	0	0	0	0
BnaA01G0164300ZS	23.96	31.4	33.04	45.85	46.26	42.02	22.39	21.92	19.25	24.59	24.05	21.71	31.34	34.93	32.28	48.37	51.15	46.46	29.8	33.83	28.96	25.24	23.11	21.56	25.94	28.22	26.91	32.01	29.68	29.37	19.88	16.89	13.73	24.04	24.05	26.86	24.81	29.81	21.4	31.79	31.34	28.18	21.4	28.22	23.95	18.72	17.21	19.87	27.53
BnaA01G0164400ZS	5.67	6.73	4.9	2.4	2.47	3.18	4.89	5.37	4.66	5.75	4.23	4	6.11	6.41	5.14	2.78	2.35	3.05	3.87	4.14	3.93	5.32	5.89	4.11	4.88	4.55	5	4.31	4.85	4.26	4.81	5.29	4.59	8.28	6.84	6.79	3.2	4.83	4.04	4.26	3.95	4.56	3.36	3.55	3.91	6.99	8.44	7.63	5.55
BnaA01G0164500ZS	0	0.02	0	0	0	0	0	0	0	0	0	0	0	0	0	0	0	0	0	0	0	0	0	0	0	0	0	0	0	0	0.13	0.11	0.08	0.03	0	0.06	0	0	0	0	0	0	0	0	0	0	0.06	0	0
BnaA01G0164600ZS	0	0.17	0	0.03	0	0	0.08	0.08	0	0.04	0.16	0.03	0	0	0.11	0	0.04	0	0	0.04	0.12	0.03	0	0.03	0.04	0	0	0	0.08	0.13	0.21	0.04	0	0.08	0.17	0	0	0	0	0.04	0.18	0	0.04	0	0	0	0.09	0.05	0
BnaA01G0164700ZS	34.32	32.53	34.03	41.21	42.24	43.72	51.11	49.67	50.86	60.97	55.71	59.72	52.67	44.65	50.12	54.1	55.54	57.28	52.59	41.62	52.87	60.71	50	55.75	42.08	38.69	37.95	34.12	31.77	32.2	37.6	38.72	40.74	38.65	41.3	35.56	44.1	40.67	44.7	22.5	28.28	23.9	35.32	37.44	33.02	47.19	50.23	48.14	38.59
BnaA01G0164800ZS	0	0	0	0	0	0	0	0	0	0	0	0	0	0	0	0	0	0	0	0	0	0	0	0	0	0	0	0	0	0	0	0	0	0	0	0	0	0	0	0	0	0	0	0	0	0	0	0	0
BnaA01G0164900ZS	11.94	9.9	11.97	86.71	87.54	88.62	1793.46	1728.05	1586.05	2164.09	2184.59	2400.67	16.32	12.36	11.38	222.03	195.7	209.61	1637.39	1623.85	1718.93	2405.97	2194.41	2526.58	2.55	2.11	1.07	118.36	111.38	116.42	1168.07	1167.38	1206.35	946.28	1050.21	1069.6	4.28	4.96	7.96	270.36	274.32	261.78	1711.98	1737.56	1697.29	1316.07	1213.87	1256.9	13.03
BnaA01G0165000ZS	33.73	32.04	37.79	378.6	364.63	368.85	6952.02	6885.02	6524.61	4406.73	4362.9	4423.4	51.61	36.75	34.67	901.38	782.2	823.49	6115.2	6080.18	6209.16	6052.86	5680.31	6451.89	10	6.34	3.94	563.35	542.77	543.49	5295.1	5598.69	5561.15	2630.92	2867.72	2922	16.34	21.36	32.36	983.96	1057.68	972.25	6924.2	6887.58	7251.1	5595.5	5230.98	5201.53	40.35
BnaA01G0165100ZS	9.53	9.72	9.79	14.11	12.14	12.22	6.75	6.6	6.63	4.76	4.66	4.61	11.01	11.72	12.1	15.06	16.2	17.06	11.67	12.62	10.83	5.7	5.76	6.2	8.78	9.62	9	9.9	9.45	8.82	5.77	5.03	5.54	2.9	2.38	3.43	7.8	8.43	7.31	10.31	8.04	9.67	8.41	8.06	7.15	3.83	4.03	3.53	9.55
BnaA01G0165200ZS	0	0	0	0	0	0	0	0	0	0	0	0	0	0	0	0	0	0	0	0	0	0	0	0	0	0.09	0	0	0	0	0	0	0	0	0	0	0	0	0	0	0	0	0	0	0	0	0	0	0
BnaA01G0165300ZS	0.15	0.19	0.06	0.07	0.03	0.09	0.01	0	0.08	0.01	0	0.03	0.25	0.26	0.25	0.1	0.07	0.15	0.06	0.1	0.07	0.13	0.07	0.15	0.03	0.09	0.02	0.03	0.12	0.04	0.1	0.05	0.05	0.01	0.02	0.04	0.06	0.04	0.02	0.08	0.07	0.08	0.1	0.14	0.13	0.07	0.13	0.03	0.24
BnaA01G0165400ZS	19.07	22.83	20.79	25.47	26.41	28.36	16.28	18.4	16.68	9.02	9.58	10.6	23.53	22.19	21.47	29.18	26.52	25.95	14.57	15.85	14.81	15.18	13.84	15.19	19.95	18.64	14.72	46.83	43.63	38.78	15.74	13.52	15.51	10.25	12.54	14.36	15.42	16.67	21.47	24.29	25.54	27.23	12.8	12.2	14.3	10.5	10.93	10.05	27.17
BnaA01G0165500ZS	0.65	0.59	0.93	0.31	0.22	0.33	0.06	0.03	0.05	0.02	0	0	0.68	0.77	0.49	0.81	0.46	0.69	0.07	0.03	0.13	0.02	0	0	0.11	0.08	0.17	0.52	0.61	0.36	0	0	0	0	0.09	0.18	0.2	0.11	0.11	0.49	0.28	0.05	0	0.16	0.19	0	0.03	0	0.9
BnaA01G0165600ZS	0	0	0	0	0	0	0	0	0	0	0	0	0	0	0	0	0	0	0	0	0	0	0	0	0	0	0	0	0	0	0	0	0	0	0	0	0	0	0	0	0	0	0	0	0	0	0	0	0
BnaA01G0165700ZS	0.14	0.03	0.11	0.33	0.41	0.38	0.21	0.31	0.17	0.17	0.06	0.03	0.09	0.05	0.06	0.46	0.26	0.36	0.09	0.11	0.09	0.02	0	0.18	0.21	0.11	0.1	0.52	0.44	0.75	0.14	0.18	0.13	0.1	0.27	0.07	0.24	0.28	0.42	0.17	0.23	0.29	0.13	0.07	0.11	0.02	0.04	0.22	0.02
BnaA01G0165800ZS	1.09	1.29	0.62	0.65	0.37	0.92	0.64	1.1	0	0	0.3	0.18	0.68	1.33	2.08	0.85	0.49	0.27	0.26	0.04	0	0.51	0.23	1.07	6.09	6.15	5.93	1.27	0.27	1.72	0.8	1.3	0.7	0.99	1.31	2.63	7.77	7.11	6.83	1.3	1.28	0.51	0.57	1.39	0.56	0.46	0.67	0.57	1.05
BnaA01G0165900ZS	0	0	0	0.01	0	0	0	0	0	0	0	0	0	0	0	0	0	0.04	0	0	0	0	0	0	0	0	0	0	0	0	0	0	0	0	0	0	0	0	0	0	0	0	0	0	0	0	0	0	0
BnaA01G0166000ZS	0	0	0	0	0	0	0	0	0	0	0	0	0	0	0	0	0.01	0	0	0	0	0	0.01	0	0	0	0	0	0	0	0.01	0	0	0.13	0.16	0.08	0	0.01	0	0	0	0	0	0	0	0.09	0.09	0.09	0
BnaA01G0166100ZS	21.86	18.99	20.43	16.88	16.45	18.78	9.47	9.21	8.96	8.53	9.3	8.37	30.7	26.84	31.11	15.08	13.33	11.91	7.03	5.78	5.83	4.88	4.34	5.6	16.19	15.91	15.46	9.86	7.87	8.26	8.53	9.37	10.28	26.17	24.48	24.29	17.11	16.05	20.13	2.86	4.11	2.84	9.04	6.63	6.53	16.92	14.92	16.23	17.86
BnaA01G0166200ZS	0.56	0.63	0.81	0.46	0.4	0.63	0.35	0.45	0.29	0.26	0	0.21	0.39	1.13	0.93	0.64	0.19	0.17	0.2	0.15	0.29	0.04	0.04	0.19	1.01	1.37	1.14	0.43	1.06	1.08	0.26	0.94	0.57	0.47	0.32	0.37	0.84	0.72	0.87	0.58	0.54	0.86	0.25	0.38	0.34	0.2	0.16	0.35	0.86
BnaA01G0166300ZS	0.14	0.25	0.14	0	0.11	0	0.04	0	0	0.06	0	0	0.14	0.32	0.15	0.03	0.07	0.03	0	0	0	0	0	0.06	0.46	0.24	0.33	0	0.07	0.08	0.08	0	0	0	0	0	0.46	0.46	0.34	0	0	0.03	0	0	0.13	0	0	0	0
BnaA01G0166400ZS	2.09	2.42	2.35	2.12	1.67	1.97	1.97	1.74	1.7	2.58	2.68	2.72	2.33	1.28	1.83	1.86	1.83	1.91	1.09	1.85	1.06	2.39	2.02	2.56	1.26	1.45	1.15	1.66	1.41	1.57	0.79	0.9	1.01	1.93	1.99	2.1	1.24	1.54	0.86	1.59	1.47	1.2	1.17	1.02	1.24	1.43	1.26	1.17	2.06
BnaA01G0166500ZS	0	0.04	0.04	0.35	0.27	0.08	0.04	0.22	0	0	0.08	0.07	0.29	0.4	0.22	0.39	0.36	0.47	0.23	0.28	0.16	0.1	0.22	0	0.81	0.78	0.57	0.25	0.35	0.32	0.13	0.33	0.1	0.08	0.32	0.4	0.57	0.85	0.82	0.7	1	0.28	0.08	0.24	0.34	0.5	0.23	0.49	0
BnaA01G0166600ZS	0.16	0	0	0	0	0	0	0	0	0	0	0	0	0	0	0	0	0	0	0	0	0	0	0	0	0	0	0	0	0.13	0	0	0	0	0	0	0	0	0	0	0	0	0	0	0	0	0	0	0
BnaA01G0166700ZS	0.39	0.46	0.51	0	0	0	0.01	0.04	0.07	0	0	0	0.08	0.1	0.19	0	0.01	0	0	0.02	0	0.02	0	0	0	0.01	0.01	0.14	0.21	0.09	0	0.01	0.03	0.01	0	0	0	0.01	0	0.05	0.07	0.1	0.02	0	0	0	0	0	0.08
BnaA01G0166800ZS	0	0.1	0.11	0.2	0	0.21	0.5	0.61	0	0.23	0.4	0.3	0	1.05	0.48	0.72	0.25	0.21	0.19	0.12	0.11	0.11	0.1	0.09	0	0.32	0	0	0	0	0	0.36	0	0	0.42	0	0.13	0.25	0	0.13	0	0	0.23	0	0.93	0.76	0.27	0.4	0
BnaA01G0166900ZS	0.59	1.31	1.47	0.91	1	1.35	1.59	1.85	1.88	2.46	2.32	2.15	3.38	2.57	2.19	1.92	2.05	1.31	0.87	0.39	0.78	2.39	2.61	3.22	4.23	6.83	5.51	3.21	2.57	3.28	1.72	2.79	2.45	2.99	3.38	3.55	5.89	7.47	7.18	3.34	2.98	3.89	2.31	2.29	1.77	6.1	4.59	4.77	1.45
BnaA01G0167000ZS	0.16	0.19	0.17	1.4	1.17	0.97	1.58	1.38	1.29	2.02	1.83	2.27	0.48	0.49	0.38	1.97	1.88	1.81	1.48	1.65	1.46	2.73	2	3	0.87	0.92	0.83	0.37	0.21	0.31	0.3	0.49	0.51	0.55	0.42	0.65	1.72	1.57	2.12	0.5	0.42	0.23	0.69	0.61	0.53	0.52	0.36	0.45	0.21
BnaA01G0167100ZS	1.65	1.69	0.91	3.03	3.38	2.92	2.95	2.18	3.32	2	2.29	2.87	1.94	1.4	1.59	3.2	2.66	3.65	1.9	1.65	2.21	1.61	1.19	1.55	3.42	3.24	3.22	3.48	2.51	3.64	2.25	2.58	2.86	1.99	1.65	2	2.71	3.04	2.92	2.99	2.57	2.69	1.07	2.11	1.59	1.43	0	0.59	0.83
BnaA01G0167200ZS	163.42	162.82	166.62	107.4	105.2	106.44	44.7	41.4	44.33	14.19	15.24	13.44	176.82	184.09	165.9	124.11	124.55	119.81	61.29	68.27	61.95	26.61	21.34	22.71	170.11	182.6	172.03	62.01	63.32	69.14	36.55	36.1	33.76	8.69	9.4	7.64	150.61	146.48	147.65	62.44	52.64	58.31	42.51	39.09	37.09	15.17	16.07	15	86.27
BnaA01G0167300ZS	47.11	49.16	47.68	76.97	76.09	72.58	11.93	13.74	12.32	3.04	3.53	4.39	44.83	44.58	45.12	91.23	90.81	94.35	33.09	32.05	32.34	3.04	2.21	2.71	42.41	42.63	44.09	60.12	61	66.49	10.6	13.03	11.83	2.96	2.87	3.58	50	53.96	49.48	49.7	46.84	47.55	23.21	21.79	22.39	2.06	1.82	1.71	37.32
BnaA01G0167400ZS	18.6	19.52	19.76	52.86	54.29	65.68	158.61	155.27	158.62	79.51	84.18	73.73	33.46	27.25	31.38	96.73	113.32	102.06	156.32	156.32	159	135.65	124.76	138.94	39.2	36.16	32.93	159.34	158.95	156.14	259.77	271.29	259.79	236.25	241.52	247.43	56.21	43.25	51.17	129.41	144.63	124.26	141.89	152.1	147.89	226.72	225.19	225.18	14.77
BnaA01G0167500ZS	26.8	25.21	25.94	3.64	6.07	3.94	14.55	13.62	14.71	21.69	21.24	21.09	28.65	28.64	29.18	3.61	4.13	3.73	5.31	5.05	4.61	24.46	20.88	21.96	12.2	11.61	13.28	4.55	4.9	4.06	15.68	16.4	19.16	37.3	40.2	40.16	8.58	8.26	9.84	2.36	2.4	2.46	8.56	8.23	8.26	17.8	17.97	16.34	9.97
BnaA01G0167600ZS	0	0	0	0	0	0	0	0	0	0	0	0	0	0	0	0	0	0	0	0	0	0	0	0	0	0	0	0	0	0	0	0	0	0	0	0	0	0	0	0	0	0	0	0	0	0	0	0	0
BnaA01G0167700ZS	0	0	0	0.17	0	0	0	0	0.14	0	0	0	1.66	2.02	2.2	1.55	1.27	1.2	1.27	1.13	0	0.92	0.97	2.25	0	0	0	0.01	0	0	0	0	0	0	0	0	1.47	0.46	1.13	0.73	0.29	0.62	1.01	0.47	0.41	1.04	0.49	0.6	0.17
BnaA01G0167800ZS	0	0	0	0	0	0	0	0	0	0.05	0	0	0	0.02	0.06	0	0	0	0.04	0.03	0.03	0.05	0.12	0.13	0	0	0	0	0	0	0	0	0.03	0.03	0	0	0	0	0	0	0	0	0	0.03	0	0	0	0	0
BnaA01G0167900ZS	1.38	3.44	2.44	3.74	4.77	3.5	1.81	1.8	1.77	3.33	3.93	3.87	4.75	5.83	6.06	3.82	3.86	3.92	0.75	1.65	2.19	2.22	4.23	2.55	4.03	3.81	5.05	2.31	3.22	3.35	1.9	1.56	2.17	2.79	2.49	3.09	3.74	5.72	5.53	2.12	4.06	2.23	1.18	1.41	0	3.78	3.36	3.51	3.77
BnaA01G0168000ZS	0.06	0	0.07	0.08	0	0.02	0	0	0	0.02	0	0.1	0	0	0	0	0	0	0	0	0	0	0	0	0.07	0	0	0	0	0	0.06	0	0.04	0	0.03	0.13	0	0	0	0	0	0	0	0	0	0	0	0	0.05
BnaA01G0168100ZS	1.62	1.94	1.18	1.7	1.83	2.04	0.34	0.57	0.29	1.09	1.11	1.01	2.83	3.23	2.75	2.24	2	2.65	1.8	1.78	1.23	0	0	0.22	1.15	0.89	1.04	0.96	0.87	1.21	0.21	1.49	0.74	2.69	1.8	1.38	1.55	1.45	1.04	0.92	0.6	0.65	0.28	0.56	0.61	3.9	5.3	4.37	2.66
BnaA01G0168200ZS	0	0	0.25	1.65	2.51	2.14	9.97	8.78	7.46	6.01	6.98	7.4	0.71	0.18	0.08	3.57	3.27	2.69	5.39	4.49	4.82	1.6	0.6	0.66	1.13	1.07	0.95	2.17	2.38	2.36	12.26	12.11	13.67	8.97	9.47	7.42	1.06	0.86	1.57	2.26	0.9	1.28	3.64	3.96	3.38	22.12	18.51	18.04	0.15
BnaA01G0168300ZS	2.04	0.97	0.54	0.92	0.62	1.57	0.91	1.95	1.7	1.05	0.17	0.71	3.26	3.49	3.24	3.41	2.69	1.55	2.09	1.51	1.92	0.51	0.68	0	0.77	1.19	0.31	0	1.89	3.1	0	0	0.16	0.83	2.04	0	2.15	1.47	1.78	1.52	1.27	1.93	0.69	0.98	1.29	2.45	2.09	3.33	2.97
BnaA01G0168400ZS	0	0	0	0	0	0	0	0	0	0	0	0	0	0	0	0	0	0	0	0	0	0	0	0	0	0	0	0	0	0	0	0	0	0	0	0	0	0	0	0	0	0	0	0	0	0	0	0	0
BnaA01G0168500ZS	8.1	8.41	9.17	9.19	9.8	8.85	4.1	4.55	4.57	6.5	7.23	6.49	9.59	11.4	11.07	10.07	9.09	10.11	6.03	5.46	5.38	5.38	5.8	5.56	9.16	7.92	8.74	6.6	6.49	6.98	3.57	3.49	3.72	6.19	6.01	7.06	6.72	8.85	7.97	6.51	6.58	7.16	3.62	3.84	3.57	7.57	7.06	7.53	7.88
BnaA01G0168600ZS	0	0	0	0	0	0	0	0	0	0	0	0	0	0	0	0	0	0.05	0	0	0.05	0	0	0	0	0	0	0	0	0	0	0	0	0	0	0	0	0	0	0	0	0	0.11	0.1	0	0	0	0	0
BnaA01G0168700ZS	0	0	0	0.07	0	0	0.23	0.16	0.08	0.07	0	0	0	0	0	0.27	0.38	0.4	0.12	0.15	0.15	0	0	0	0	0	0	0.15	0	0.08	0.08	0.16	0.45	0	0	0	0	0	0	0.08	0	0.07	0.61	0.98	1.16	0	0	0	0
BnaA01G0168800ZS	0.15	0.42	0.58	0	0	0	0	0	0	0	0	0	0.56	0.15	0.21	0.48	0.3	0.92	0.1	0.2	0.28	0	0	0	0	0	0	0	0	0	0	0	0	0	0	0	0.66	0.09	0.66	0	0	0	0.07	0	0.11	0.16	0.04	0.35	0.14
BnaA01G0168900ZS	0	0	0	0	0	0	0	0.14	0	0	0	0	0.28	0.17	0.38	0	0	0	0	0	0	0	0	0	0	0	0	0	0.12	0.8	0	0	0	0	0	0	0	0	0	0	0	0	0	0	0.1	0	0.32	0.12	0
BnaA01G0169000ZS	0	0	0	0.14	0	0	0	0.03	0	0	0	0	0	0	0	0	0.03	0	0	0	0	0	0.06	0	0	0	0	0	0.03	0	0	0	0	0	0	0	0	0	0	0	0	0.03	0	0.02	0	0.04	0	0	0
BnaA01G0169100ZS	0.2	0.27	0.15	0	0.05	0.05	0.11	0	0	0	0	0	0	0	0	0	0	0	0.13	0.05	0.16	0	0	0	0.05	0	0.05	0.27	0.05	0.17	0	0	0	0	0	0	0.06	0.41	0.22	0.05	0.1	0	0	0	0	0	0.12	0	0.17
BnaA01G0169200ZS	0	0	0	0	0	0	0	0	0	0	0	0	0	0	0	0	0	0.18	0	0	0	0	0	0	0	0	0	0	0	0	0	0	0	0	0	0	0.22	0	0	0	0	0	0.2	0	0	0	0	0.24	0
BnaA01G0169300ZS	2.18	2.18	2.28	0.74	1.1	1.25	0.6	0.34	0.54	0.98	0.95	0.93	0.83	1.11	0.81	0.39	0.26	0.46	0.13	0.02	0.1	0.27	0.17	0.12	1.04	1.14	1.17	0.9	1.15	0.71	0.33	0.45	0.83	0.43	0.21	0.81	0.95	0.65	0.47	0.39	0.29	0.19	0.03	0.09	0.05	0.48	0.37	0.59	1.59
BnaA01G0169400ZS	0.34	0.42	0.4	1.19	0.88	0.52	0.34	0.53	0.48	0.43	0.5	0.42	1.01	0.46	0.61	0.55	0.99	0.51	0.17	0.12	0	0.04	0	0.19	1.01	1.02	0.69	0.76	0.44	0.72	0.43	0.47	0.4	0.74	0.39	0.48	0.35	0.36	0.48	0.09	0.09	0.17	0.14	0.04	0.07	0.47	0.42	0.43	0.7
BnaA01G0169500ZS	1.24	1.77	1.27	1.44	1.57	1.83	1.1	1	0.86	0.55	0.77	0.73	0.94	0.79	0.77	1.33	1.41	1.3	0.98	0.79	0.36	0.42	0.55	0.31	0.61	1.24	0.52	0.81	0.79	1.6	1.19	0.74	0.9	1.09	1	0.98	0.4	0.5	0.61	0.63	0.44	0.71	0.59	0.18	0.34	0.48	0.85	0.52	1.48
BnaA01G0169600ZS	2.78	2.85	2.38	1.58	1.82	1.56	1.68	2.06	2.07	2.26	1.37	1.94	3.56	2.58	2.94	2.67	3.39	3.25	2.74	3.21	3.86	2.8	2.75	2.83	2.44	2.1	1.7	1.74	2.42	1.84	1.17	2.15	1.2	1.51	1.26	0.99	1.96	2.92	2.14	2.19	2.65	2.54	2.56	2.54	2.34	1	2.11	1.98	2.31
BnaA01G0169700ZS	5.14	4.33	4.28	4.63	5.03	5.28	1.08	2.02	2.42	5.71	5.14	4.23	7.21	7.51	8.05	4.31	4.16	4.48	2.08	2.74	2.3	3.45	3.54	4.6	6.12	5.74	5.03	3.26	3.75	2.95	2.15	0.94	0.85	3.98	4.42	4.55	5.99	4.67	5.59	3.57	2.91	3.13	1.67	1.44	1.44	4.2	4.35	4.03	5.67
BnaA01G0169800ZS	0.9	0.75	0.87	2.09	1.83	1.47	1.49	1.19	2.23	1.43	1	1.47	2.11	3.13	1.2	3.11	2.84	3.52	2.63	2.77	2.8	1.33	1.42	1.89	0.78	0.64	0.9	1.12	1.14	1.45	1.23	1.44	1.41	1.01	1.15	0.83	0.75	0.76	1.38	1.38	1.38	1.61	1.64	1.21	1.18	0.98	0.89	0.8	1.25
BnaA01G0169900ZS	0	0	0	0	0	0.59	0.03	0	0.07	0	0	0	0	0.6	1	0	0.11	0	0.14	0.07	0	0	0	0	0	0.71	0	0	0.14	0	0.04	0	0.08	0.03	0.04	0.07	0	1.61	0	0.13	0.41	0.19	0.03	0.03	0.12	0	0	0	0
BnaA01G0170000ZS	0	0	0	0	0	0	0	0	0	0	0	0.16	0	0.33	0	0	0	0	0	0	0	0	0	0	0.36	1.4	0	0	0	0	0	0.19	0.87	0	0.41	0	0.59	1.09	1.55	0.55	0	0	0	0.18	0.22	0	0	0	0
BnaA01G0170100ZS	0.49	0.23	0.65	0.59	0.33	0.82	0.16	0	0.18	0.09	0.28	0.08	0.38	0.09	0.3	0.38	0.19	0.49	0.25	0.65	0.22	0	0	0	0.11	0.57	0.49	0.26	0.73	0.35	0.31	0.2	0.27	0	0.26	0.05	0.13	0.52	0.55	0	0.23	0.33	0.09	0.05	0.2	0	0	0	0.62
BnaA01G0170200ZS	1.43	2.13	1.68	1.54	0.85	1.6	1.05	1.22	1.1	0.27	0.82	1.02	5.72	5.5	6.54	6.83	3.78	4.39	1.92	2.33	2.51	0.86	0.69	0.88	1.55	1.38	1.91	0.73	0.81	0.4	0.86	0.59	1.01	1.38	0	1.18	2.99	2.22	3.37	1.22	1.04	0.57	1.45	1.09	0.37	1.91	1.35	2.55	2.14
BnaA01G0170300ZS	0	0	0	0	0	0	0	0	0	0	0	0	0	0	0	0	0	0	0	0	0	0	0	0	0	0	0	0	0	0	0	0	0	0	0	0	0	0.13	0	0	0	0	0	0	0	0	0	0	0
BnaA01G0170400ZS	1.83	1.48	1.77	16.08	11.3	15.33	6.2	5.66	7.25	6.11	4.92	5.53	3.71	4.53	4.59	10.31	11.85	10.62	7.41	9.15	8.44	5.02	4.3	4.63	3.66	2.56	2.62	7.6	4.87	5.51	2.68	2.88	2.93	1.42	1.06	1.11	5.04	4.52	2.76	4.44	4.54	4.59	1.03	2.21	1.62	1.64	1.45	2.49	0.6
BnaA01G0170500ZS	0	0	0	0	0	0	0	0	0	0	0	0	0	0	0	0	0	0	0	0	0	0	0	0	0	0	0	0	0	0	0	0	0	0	0	0	0	0	0	0	0	0	0	0	0	0	0	0	0
BnaA01G0170600ZS	0	0.02	0	0	0	0.07	0	0	0	0	0	0	0	0	0	0.04	0	0	0	0	0	0	0	0	0	0	0.05	0.05	0	0	0	0.05	0	0	0	0	0	0	0	0	0	0	0	0	0	0	0	0	0
BnaA01G0170700ZS	0	0	0	0	0	0	0	0	0	0	0	0	0	0	0	0	0	0	0	0	0	0	0	0	0	0	0	0	0	0	0	0	0	0	0	0	0	0	0	0	0	0	0	0	0	0	0	0	0
BnaA01G0170800ZS	8.21	9.49	9.15	1.06	0.94	0.65	0.07	0.29	0.28	0.19	0	0.36	3.22	3.4	3.76	1	0.4	1.1	0.29	0.21	0.06	0.31	0.13	0.11	1.89	1.19	2.44	0.07	0.52	0.71	0.09	0.15	0.51	0.07	0.16	0.08	1.17	2.24	1.68	0.29	0	0	0.43	0	0.67	0.87	0.72	0.43	3.13
BnaA01G0170900ZS	0	0	0	0	0	0	0	0	0	0	0	0	0	0	0	0	0	0	0	0	0	0	0	0	0	0	0	0	0	0	0	0	0	0	0	0	0	0	0	0	0	0	0	0	0	0	0	0	0
BnaA01G0171000ZS	0	0	0	0	0	0	0	0	0	0	0	0	0	0	0	0	0	0	0	0	0	0	0	0	0	0	0	0	0	0	0.03	0	0.03	0	0	0	0	0	0	0	0	0	0	0	0	0	0	0	0
BnaA01G0171100ZS	0	0	0	0	0	0	0	0	0	0	0	0	0	0	0	0	0	0.03	0	0	0	0	0	0	0	0	0	0	0	0	0	0	0	0	0	0	0	0	0	0	0	0	0	0	0	0	0	0	0
BnaA01G0171200ZS	3.59	4.91	3.58	0	0	0	2.1	1.45	1.45	0	0	0	1.1	1.28	0.76	0	0	0	0	0	0	0	0	0	1.34	0.86	0.71	39.96	38.46	38.47	0.21	0.28	0.13	2.2	2.26	2.18	0.06	0	0.49	1.77	1.5	2.13	0	0.15	0	0.25	0.24	0.25	2.26
BnaA01G0171300ZS	8.6	8.32	7.63	6.56	8.6	7.08	3.41	4.91	5.49	6.1	6.29	6.41	4.64	4.92	6.07	6.39	5.09	6.78	3.1	3.35	1.94	3.38	3.92	2.7	6.38	8.22	8.5	6.68	7.36	7.34	3.3	3.85	4.91	10.17	9.82	10.59	5.23	6.79	5.22	3.92	4.3	3.8	3.15	3.15	1.97	5.57	6.02	6.15	5.13
BnaA01G0171400ZS	0	0	0	0	0	0	0	0	0	0	0	0	0	0	0	0	0	0	0.04	0	0	0	0	0	0	0	0	0	0	0	0	0	0	0	0	0	0	0	0	0	0	0	0	0	0	0	0	0	0
BnaA01G0171500ZS	4.4	3.55	3	9.9	10.06	7.96	1.93	1.42	0.72	0.63	0.62	0.74	2.02	3.23	2.38	10.03	9.35	8.89	3.17	4.04	2.99	0.06	0.3	0.32	1.53	1.91	1.27	4.38	5.73	4.52	1.54	1.34	1.59	0.03	1.15	1.11	1.83	1.81	1.37	3.4	3.96	3.06	3.21	3.33	2.57	0.84	1.06	1.03	1.9
BnaA01G0171600ZS	0.09	0.06	0	0.34	0.23	0	0.05	0	0.24	2.18	1.56	2.12	0.09	0.11	0.07	0.16	0.28	0.24	0	0.12	0.07	1.63	1.83	1.18	0.1	0.14	0.13	0.23	0	0	0.69	0	0.58	14.2	11.95	13.5	0.36	0.08	0.15	0.25	0.32	0.29	0.23	0.21	0.22	9.65	8.01	8.05	0
BnaA01G0171700ZS	0	0	0.21	0.09	0	0	0.22	0.11	0	0.1	0	0.21	0.11	0.05	0	0	0	0	0	0	0	0	0.1	0	0	0	0.11	0.22	0	0	0.26	0.22	0	0	0	0	0	0	0	0	0	0	0	0	0	0	0	0	0
BnaA01G0171800ZS	2.31	1.34	1.56	1.52	1.76	0.94	2.84	2.6	2.24	3.79	6.17	4.12	0.87	1.35	0.87	1.79	0.83	0.52	0.87	0.98	1.41	0.84	2.61	2.12	0.63	1.13	2.02	2.67	2.36	1.52	2.42	3.54	4.03	1.5	2.7	2.64	1.31	1.36	1.83	0.07	1.28	0.85	0.5	0.71	0.87	3.22	1.48	1.43	2.55
BnaA01G0171900ZS	0	0.05	0	0.12	0.54	0	0	0	1.21	0.24	0	0	0.38	0	0	0	0	0	0.26	0	0.43	0.41	0	0	0	0	0	0	0	0	0.02	0	0	0	0	0	0	0	0	0	0	0	0	0.09	0	0	0	0	0
BnaA01G0172000ZS	0	0	0	0	0	0	0	0	0	0	0	0	0	0	0	0	0	0	0	0	0	0	0	0	0	0	0	0	0	0	0	0	0	0	0	0	0	0	0	0	0	0	0	0	0	0	0	0	0
BnaA01G0172100ZS	12.66	11.34	14	12.75	11.65	12.9	10.52	10.08	10.33	5.69	6.49	5.57	11.09	11.05	11.32	9.35	7.79	9.93	6.7	6.4	6.04	4.53	3.58	5.38	12.64	13.56	10.85	15.63	14.98	16.23	8.15	8.67	10.23	5.75	6.75	5.38	7.26	7.68	7.56	7.45	9.68	8.49	5.37	7.12	7.22	7.56	7.6	7.32	14.79
BnaA01G0172200ZS	4.02	4.34	3.3	10.04	10.17	11.75	0	0	0	0	0	0	6.88	7.36	7.46	13.29	12.37	11.6	3.49	2.52	3.81	0	0	0	5.51	4.63	4.97	9.37	8.19	8.4	0	0	0	0	0	0	3.96	3.83	5.7	11.71	11.18	9.75	1.56	0.61	1.32	0	0	0	3.62
BnaA01G0172300ZS	4.85	5.28	4.43	5.09	5.4	6.11	18.52	20.91	19.28	16.5	17.46	19.26	4.52	4.3	5.9	4.43	4.41	4.4	6.31	11.79	9.15	11.08	14.27	13.61	6.37	5.05	5.87	4.67	3.32	3.73	21.45	19.9	18.93	15.22	18.76	19.47	5.17	3.24	4.84	5.47	4.07	2.86	11.12	8.65	9.7	22.87	20.63	21.17	2.82
BnaA01G0172400ZS	0	0	0	0	0	0	0	0	0	0	0	0	0	0	0	0.02	0	0	0	0	0	0	0	0	0.1	0	0	0	0	0	0	0	0	0	0	0.18	0	0	0	0	0	0	0	0	0	0	0	0	0
BnaA01G0172500ZS	0.28	0.05	0.12	0.26	0.31	0.05	0	0	0	0	0	0	1.49	1.59	1.14	0.94	0.82	0.83	0	0	0.24	0.2	0.05	0	0.35	0.62	0.3	0.18	0.43	0.9	0	0.18	0	0	0	0	2.11	2	1.81	0.95	0.84	0.99	0.06	0	0	0	0	0	0.72
BnaA01G0172600ZS	0	0	0	0	0	0	0	0	0	0	0	0	0	0	0	0	0	0	0	0	0	0	0	0	0	0	0	0	0	0	0	0	0	0	0	0	0	0	0	0	0	0	0	0	0	0	0	0	0
BnaA01G0172700ZS	0	0	0	0.09	0	0.06	0	0	0	0.14	0.04	0.02	0	0	0	0	0	0	0	0	0	0	0.04	0	0.25	0	0	0.07	0	0	0	0.02	0	0.01	0.1	0	0.08	0	0.27	0	0	0	0	0.02	0	0	0	0	0
BnaA01G0172800ZS	1.06	1.17	0.97	0.86	0.63	0.61	1.24	1.6	1.28	1.11	1.06	1.02	1.49	1.9	1.44	1.62	1.64	1.78	1.72	1.28	1.64	1.64	1.95	1.72	0.38	0.82	0.77	0.78	0.95	0.97	1.43	1.15	1.07	1.98	2.42	2.2	1.25	1.08	1.08	0.65	0.84	0.77	1.59	1.69	1.67	3.56	4.3	4.62	1.39
BnaA01G0172900ZS	0.92	0.78	1.26	0.92	1	1.06	0.74	0.68	1	0.74	0.88	0.78	1.83	2.39	1.83	3.13	3.67	3.69	0.97	0.96	1.11	0.55	0.79	0.41	1.34	1.62	1.63	1.2	1.3	0.98	0.43	0.74	0.98	1.06	1	1.21	3.23	2.63	2.46	0.92	0.98	1.08	1.59	1.71	1.66	3.7	5.15	4.34	1.58
BnaA01G0173000ZS	0	0	0	0	0	0	0	0	0	0	0	0	0	0	0	0	0	0	0	0	0	0	0	0	0	0	0	0	0	0	0	0	0	0	0	0	0	0	0	0	0	0	0	0	0	0	0	0	0
BnaA01G0173100ZS	0.3	0.05	0.55	0	0	0	0.06	0	0.06	0	0	0	0	0	0	0	0	0.05	0.15	0.19	0.19	0	0	0	0	0	0	0	0.39	0.07	0	0.06	0.07	0.06	0	0	0	0	0	0.29	0.18	0.24	0	0.12	0	0.07	0	0	0
BnaA01G0173200ZS	0	0	0	0	0	0	0	0	0	0	0	0	0	0	0	0	0	0	0	0	0	0	0	0	0	0	0	0	0	0	0	0	0	0	0	0	0	0	0	0	0	0	0	0	0	0	0	0	0
BnaA01G0173300ZS	0	0.15	0.3	0.03	0.14	0.13	0.03	0.04	0	0	0	0.09	0.14	0.15	0.29	0.03	0.07	0.24	0.08	0.1	0	0.23	0.06	0	0.07	0.03	0.1	0	0	0.08	0	0	0.12	0.12	0.08	0.89	0.15	0.1	0	0.07	0.03	0.1	0.03	0.03	0.12	0.04	0.15	0.16	0.23
BnaA01G0173400ZS	0	0	0	0	0	0	0	0	0	0	0	0	0	0	0	0	0.04	0	0	0	0	0	0	0	0	0	0	0	0	0	0	0	0	0	0	0	0	0	0	0	0	0	0	0	0	0	0	0	0
BnaA01G0173500ZS	0.02	0	0	0.12	0.02	0.08	0.2	0.08	0.05	0.55	0.77	0.49	0.04	0	0	0.14	0	0	0	0.05	0	0.66	0.72	0.18	0	0.04	0.02	0.09	0	0.1	1.21	1.31	1.72	23.13	21.4	22.08	0	0.2	0.08	0.05	0.07	0.11	0.18	0.12	0.1	8.47	9.43	10.71	0.1
BnaA01G0173600ZS	0	0	0	0	0	0	0	0	0	0	0	0	0	0	0	0	0	0	0	0	0	0	0	0	0	0	0	0	0	0	0	0	0	0	0	0	0	0	0	0	0	0	0	0	0	0	0	0	0
BnaA01G0173700ZS	0.28	0.26	0.29	0.13	0.15	0	0.3	0	0.15	0.4	0.3	0	0.3	0.79	0.79	0.13	0	0.52	0.37	0	0	0.13	0	0.35	0	0.28	0.45	0.15	0.15	0	0	0	0	0	0	0	0	0	0	0.45	0	0.15	0	0	0	0	0	0	0.82
BnaA01G0173800ZS	0	0	0	0	0	0	0	0	0	0	0	0	0	0	0	0	0	0	0	0	0	0	0	0	0	0	0	0	0	0	0	0	0	0	0	0	0	0	0	0	0.06	0	0	0	0	0	0	0	0
BnaA01G0173900ZS	0.16	0.49	0.25	0.07	0.09	0.08	0	0.04	0	0.04	0	0	0.39	0.23	0.18	0.38	0.64	0.83	0.07	0.13	0.09	0	0	0	0.3	0.08	0.18	0	0.18	0.05	0.05	0	0.05	0	0.05	0.05	0.14	0.17	0.09	0.13	0.08	0.08	0	0.13	0	0.05	0	0.2	0.14
BnaA01G0174000ZS	3.58	3.56	4.06	3.63	2.86	2.52	0.26	0	0.13	0.31	0.16	0.35	17.82	16.57	18.28	5.38	5.5	5.47	0.25	0.47	0.14	0.38	0.11	0.28	17.36	16.4	15.93	14.64	13.73	13.21	1.35	1.59	1.19	0.16	0.61	0.3	18.64	20.04	19.67	8.94	6.63	6.92	0.71	1.13	0.59	1.3	1.47	1.51	2.66
BnaA01G0174100ZS	29.69	28.53	27.32	13.31	12.49	12.64	5.94	6.26	6.22	3.77	4.07	3.84	32.66	34.14	33.74	11.1	11.43	9.53	4.37	3.36	3.16	4.3	2.08	3.17	26.13	25.2	25.9	9.68	9.16	9.98	3.93	4.48	4.06	2.16	2.55	2.52	18.79	17.24	21.18	5.77	6.71	6.02	4.87	2.58	2.88	0.73	0	0.8	36.07
BnaA01G0174200ZS	0.1	0.01	0	0	0	0	0.09	0	0	0	0	0	0.71	0	0	0.54	0.47	0.45	0	0	0	0.44	0	0	0.04	0	0	0.21	0	0.76	0	0	0	0	0.17	0.11	0.55	1.17	1.19	0.33	0	0.78	0.58	0	0.54	1.2	0	0	0
BnaA01G0174300ZS	2.86	2.76	2.88	3.43	3.12	2.37	2.23	2.17	2.28	2.23	2.43	2.04	4.83	4.56	4.75	5.46	4.35	4.65	2.73	2.92	3.08	3.41	4.3	4.54	3.39	2.75	2.55	3.96	3.5	3.5	1.14	1.09	1.21	1.64	1.95	1.87	4.23	3.77	3.64	3.55	2.86	4.01	2.22	2.43	2.43	1.91	1.89	1.91	3.61
BnaA01G0174400ZS	0	0	0	0	0	0	0	0	0	0	0	0	0	0	0	0	0	0	0	0	0	0	0	0	0	0	0	0	0	0	0	0	0	0	0	0	0	0	0	0	0	0	0	0	0	0	0	0	0
BnaA01G0174500ZS	0	0	0	0	0	0	0	0	0	0	0	0	0	0	0	0	0	0	0	0	0	0	0	0	0	0	0	0	0	0	0	0	0	0	0	0	0	0	0	0	0	0	0	0	0	0	0	0	0
BnaA01G0174600ZS	0	0	0	0	0	0	0	0	0	0	0	0	0	0	0	0	0	0	0	0	0	0	0	0	0	0	0	0	0	0	0	0	0	0	0	0	0	0	0	0	0	0	0	0	0	0	0	0	0
BnaA01G0174700ZS	1.27	1.13	1.07	15.98	15.33	17.75	3.8	4.06	3.77	2.5	3.53	2.41	4.84	4.47	4.15	17.76	17.23	18.63	6.82	7.46	7.37	2.45	3.96	3.5	7.28	6.27	7.56	8.14	7.38	8.44	1.45	2.48	1.96	1.66	1.06	1.16	5.67	6.17	6.14	7.28	8.08	6.01	5	4.31	6.82	2.5	1.91	2.41	0.38
BnaA01G0174800ZS	0	0	0	0	0	0	0	0	0	0	0	0.07	0	0	0	0	0	0	0	0	0	0	0	0	0	0	0	0	0	0	0	0	0	0	0	0	0	0	0	0	0	0	0	0	0.09	0	0	0	0
BnaA01G0174900ZS	0	0	0	0	0	0	0	0	0	0	0	0	0	0	0	0	0	0	0.08	0	0	0	0	0	0	0	0	0	0	0	0	0	0	0	0	0	0	0	0	0	0	0	0	0	0	0	0	0	0
BnaA01G0175000ZS	0.1	0.36	0	0	0	0	0	0	0	0	0	0.09	0.31	0	0	0.09	0	0.27	0	0	0.1	0	0	0	0.38	0	0.32	0	0	0	0	0	0	0	0	0.11	0	0.21	0.22	0.1	0	0.1	0	0	0	0	0	0	0
BnaA01G0175100ZS	0.13	0.04	0.09	0.08	0.18	0.12	0	0.14	0	0.08	0.23	0	0.27	0.4	0.44	0.47	0.52	0.38	0.05	0.22	0	0.27	0.19	0.3	0.04	0.13	0.14	0.09	0.11	0.1	0.05	0	0.21	0.04	0.1	0.07	0.1	0.35	0.75	0.21	0.44	0.22	0.13	0.26	0.1	0.48	0.1	0.16	0.1
BnaA01G0175200ZS	1.15	1.45	1.41	10.94	14.54	15.39	0.77	0.83	1.12	0.3	0.44	0.68	3.56	3.59	4.84	6.67	5.71	5.86	0.7	0.8	0.38	0.57	0.64	0.48	6.52	5.37	8.63	5.8	6.83	8.4	1.25	0.82	0.78	0.51	0.47	0.46	6.36	6.24	4.85	4.32	5.48	3.53	0.62	0.56	1.02	0.58	0.27	0.28	0.68
BnaA01G0175300ZS	0	0	0	0	0	0	0	0	0	0	0	0	0	0	0	0	0	0	0	0	0	0	0	0	0	0	0	0	0	0	0	0	0	0	0	0	0	0	0	0	0	0	0	0	0	0	0	0	0
BnaA01G0175400ZS	1.42	1.45	0.86	0.44	0.8	0.59	0.65	0.83	0.64	0.91	0.79	0.74	1.86	1.9	1.73	1.96	1.41	1.4	0.61	1.31	0.74	1.22	1.03	0.85	0.87	0.77	0.45	0.59	0.74	0.97	0.57	0.42	0.44	0.79	0.75	0.99	1.53	1.88	1.07	1.63	1.63	1.95	0.99	0.97	0.64	0.86	0.8	1.01	1.24
BnaA01G0175500ZS	0.26	0.39	0.35	0.95	0.82	1.04	0.18	0.15	0.15	0.16	0	0.03	1.07	1.06	0.79	0.92	1.22	1.21	0.1	0.24	0.21	0.08	0	0.07	0.73	0.69	0.72	0.87	0.49	0.88	0.35	0.82	0.74	0.23	0.47	0.1	0.49	0.61	0.98	0.81	0.4	0.73	0.06	0.15	0.1	0.07	0.15	0.14	0.88
BnaA01G0175600ZS	4.15	2.67	3.74	2.92	2.61	4.1	13.66	12.57	11.36	16.56	11.73	13.38	2.26	2.44	1.29	10.7	7.86	9.26	16.12	16.23	18.38	19.36	17.65	23.66	2.1	2.16	3.12	8.57	14.42	8.62	34.72	32.16	46.08	20.44	26.83	30.41	1.86	0.81	1.96	10.94	14.85	11.59	14.97	14.68	13.57	17.22	14.45	17.72	6.39
BnaA01G0175700ZS	0.36	0.27	0.05	3.41	3.76	2.86	0.18	0.29	0.51	0.05	0.09	0.35	0.41	0.82	0.52	11.78	15.58	10.78	3.15	2.31	1.95	0.16	0.16	0.29	0.79	0.38	0.36	4.51	5.54	3.8	0.38	0.33	0.94	0.13	0.05	0.47	1.48	1.72	0.88	7.83	7.05	6.76	1.58	1.42	1.35	0.05	0.47	0.36	0.12
BnaA01G0175800ZS	8.45	8.33	8.18	7.04	7.06	6.21	7.64	6.87	6.35	10.9	10.58	12.11	5.73	6.59	7.66	14.35	13.89	11.1	7.98	9.08	9.36	17.08	19.55	15.36	4.53	3.94	4.68	4.39	4.89	5.22	4.84	4.61	5.04	7.23	6.78	4.42	4.92	3.67	4.29	5.43	6.72	8.69	8.91	10.39	11.28	15.04	12.37	13.6	3.4
BnaA01G0175900ZS	0	0	0	0	0	0.07	0	0.07	0	0.07	0	0	0	0	0	0	0	0	0	0	0	0	0	0	0	0.07	0	0	0	0.16	0.08	0	0	0	0	0	0	0	0	0	0	0	0.07	0	0	0	0	0	0
BnaA01G0176000ZS	0	0	0	0	0	0	0	0	0	0	0	0	0	0	0	0	0	0	0	0	0	0	0	0	0	0.48	0.1	0	0	0	0	0	0	0	0	0	0	0	0	0	0	0	0	0	0	0	0	0	0
BnaA01G0176100ZS	3.01	2.73	2.65	1.66	1.46	1.44	1.26	1.47	1.17	1.31	1.62	1.41	12.07	12.27	12.41	8.08	7.64	8.08	5.56	5.64	5.55	6.93	7.75	7.67	2.95	3	2.99	2.63	3.4	2.34	2.33	1.55	1.66	3.32	3.66	3.01	9.91	8.69	9.24	7.1	7.82	7.41	6.66	5.87	6.56	17.15	17.84	17.75	2.81
BnaA01G0176200ZS	0	0	0	0	0	0	0	0	0	0	0	0	0	0	0	0	0	0	0	0	0	0	0	0	0	0	0	0	0	0	0	0	0	0	0	0	0	0	0	0	0	0	0	0	0	0	0	0	0
BnaA01G0176300ZS	2.2	2.1	2.02	1.51	1.41	1.51	1.36	1.7	1.57	1.59	1.5	1.63	1.45	0.97	1.12	1.35	2.55	2.39	1.56	1.39	1.07	1.91	1.25	1.29	1.14	1.1	0.91	1.17	0.81	1.06	1.48	0.88	1.27	1.33	1.88	1.37	0.72	0.78	0.79	0.78	0.99	0.81	0.84	1.11	0.5	3.18	2.6	2.28	1.66
BnaA01G0176400ZS	0.12	0.04	0	0.22	0.18	0.12	0.22	0.81	0.6	0.6	0.76	0.67	0.04	0	0	0.17	0.09	0.28	0.11	0.36	0.13	0.29	0.57	0.25	0	0	0.13	0.47	0.36	0.61	2.18	0.91	1.02	1.85	1.91	1.88	0.23	0.13	0.25	0.42	0.3	0.42	0.62	0.72	0.91	2.37	3.5	4.41	0
BnaA01G0176500ZS	0	0	0	0	0	0	0	0	0	0	0	0	0	0	0	0	0	0	0	0	0	0	0	0	0	0	0	0	0	0	0	0	0	0	0	0	0	0	0	0	0	0	0	0	0	0	0	0	0
BnaA01G0176600ZS	0.18	0.17	0.11	0.1	0.09	0.21	0	0.05	0	0.06	0	0	0.47	0.96	0.74	0.2	0.21	0.13	0.13	0.13	0	0.04	0	0	1.42	1.39	0.76	0.32	0.21	0	0.07	0.05	0	0.22	0.18	0.48	0.86	0.71	0.72	0.31	0.26	0.36	0.29	0.21	0.45	0.46	0.15	0.3	0
BnaA01G0176700ZS	33.22	37.91	38.02	179.97	191.65	183.47	7.6	8.6	7.06	6.25	5.85	6.64	232.48	269.02	272.47	207.05	181.46	178.92	15.02	14.18	15.79	1.87	1.83	2.46	282.17	284.6	274.66	112.17	118.71	104.27	7.63	8.17	9.59	3.7	4.53	3.72	176.92	205.75	211.63	77.61	92.19	86.55	13.09	8.55	9.56	2.22	3.25	3.85	10.71
BnaA01G0176800ZS	0	0	0	0	0	0	0	0.03	0	0	0	0	0	0	0.09	0	0	0	0	0	0	0	0	0	0	0	0	0	0	0	0	0	0	0	0	0	0.03	0	0.03	0	0.06	0	0.06	0	0.07	0	0	0	0
BnaA01G0176900ZS	0	0	0	0	0	0	0	0	0	0	0	0	0	0	0	0	0	0	0	0	0	0	0	0	0	0	0	0	0	0	0	0	0	0	0	0	0	0	0	0	0	0	0	0	0	0	0	0	0
BnaA01G0177000ZS	0	0	0	0	0	0	0	0	0	0	0	0	0.13	0	0	0	0.07	0.12	0	0	0	0	0	0	0	0	0	0	0	0	0	0	0	0	0	0	0	0	0	0	0	0	0	0	0.08	0	0	0	0
BnaA01G0177100ZS	44.64	46.1	43.44	12.26	11.12	11.01	8.94	8.38	8.57	4.1	3.14	3.89	7.99	9.73	9.08	4.97	4.24	3.94	1.25	1.15	1.44	0.5	0.51	0.41	39.7	41.19	40.58	7.83	7.69	6.9	7.26	7.1	8.68	2.27	2	2.67	7.5	6.44	5.98	0.7	0.49	1.42	1.29	1	1.49	1.6	1.55	1.18	18.34
BnaA01G0177200ZS	0	0	0.04	0.31	0.3	0.43	0.7	0.65	0.49	0.28	0.08	0.38	0.64	0.74	0.34	1.51	2.09	2.4	1.99	3.06	2.27	1.24	1.08	0.82	0.04	0.08	0.28	0.32	0.26	0.44	0.34	0.53	0.38	0.5	0.26	0.39	0.84	1.32	0.75	0.93	0.6	0.35	1.47	1.48	1.98	0.77	1.23	1.52	0.17
BnaA01G0177300ZS	0.04	0.15	0	0.11	0	0	0.04	0	0.04	0	0	0	0	0	0.13	0	0.04	0	0	0.04	0	0	0	0.1	0	0	0	0.09	0.04	0.09	0	0.09	0.1	0	0	0	0	0	0	0	0.04	0.12	0	0	0	0	0	0.1	0.14
BnaA01G0177400ZS	0	0	0	0	0	0	0	0	0	0	0	0	0	0	0	0	0	0	0	0	0	0	0	0	0	0	0	0	0	0	0	0	0	0	0	0	0	0	0	0	0	0	0	0	0	0	0	0	0
BnaA01G0177500ZS	2.1	2.72	2.8	0.91	1.36	1.59	1.24	1.55	1.47	0.76	0.69	0.57	1.21	0.79	1.43	1.02	0.18	1.14	0.95	0.48	0.22	0.48	0.2	0.38	1.13	0.52	1.39	1.43	1.56	1.53	1.55	0.94	1.6	1.92	2.56	1.41	0.5	0.72	0.88	0.45	1.46	0.36	1.23	0.29	0.58	0.56	0.49	0.65	0.95
BnaA01G0177600ZS	4.85	3.82	4.59	3.69	3.22	3.78	2.19	1.52	1.9	1.46	1.67	0.93	2.21	2.25	0.63	2.14	1.42	0.96	1.63	2.05	1.85	0.99	0.9	1.66	4.54	4.42	2.87	2.72	2.76	2.15	1.15	0.47	0.8	0.42	0.9	0.83	2.02	1.95	3.45	1.77	2.22	1.95	0.83	0.83	1.24	0	0	0	5.36
BnaA01G0177700ZS	7.92	6.94	7.42	6.39	6.63	6.63	6.28	5.79	6.24	5.77	5.15	5.8	8.7	9.13	8.61	9.39	9.28	9.25	6.78	5.8	7.1	6.35	5.44	5.86	5.52	6.18	5.18	6.88	6.52	7.51	6.74	6.35	6.47	8.17	7.53	7.29	7.38	6.93	8.33	6.94	6.65	6.12	6.35	6.15	5.85	7.68	8.05	7.36	7.11
BnaA01G0177800ZS	0.2	0.16	0.28	0.1	0.15	0.29	0.09	0.12	0.09	0.05	0.07	0.01	0.47	0.2	0.28	0.26	0.28	0.14	0.18	0.19	0.19	0.03	0.11	0.02	0.13	0.21	0.12	0.15	0.19	0.23	0.14	0.08	0.05	0.02	0.07	0.1	0.07	0.13	0.07	0.11	0.09	0.08	0.03	0.09	0.05	0.02	0.09	0.12	0.13
BnaA01G0177900ZS	0.19	0.37	0.34	0.15	0.15	0.29	0.76	0.76	0.74	1.5	1.69	1.45	0.75	1.1	0.43	0.53	0.48	0.55	0.49	0.6	0.37	0.49	0.46	0.58	0.4	0.25	0.41	0.5	0.18	0.48	0.03	0.2	0.34	0.33	0.48	0.72	0.74	0.68	0.72	0.29	0.54	0.42	0.14	0.17	0.34	1.01	0.93	0.85	0.38
BnaA01G0178000ZS	0.75	0.76	0.86	3.51	3.81	3.83	0.7	0.28	1.28	1.7	1.22	0.35	4.62	4.07	5.05	4.45	5.7	4.21	0.68	0.41	1.06	1.62	0.82	1.37	5.03	4.39	6.2	2.86	2.45	4.23	0.88	0.47	0.87	0.4	0.15	0.15	6.98	8.42	8.31	2.03	2	1.76	0.09	0.14	0.43	2.09	2.07	1.76	0.2
BnaA01G0178100ZS	0.71	0	0	1.05	0	0.55	0.51	0	0.74	0	0.11	0.23	0	0	0	0	0	0	0	0	0	0	0.05	0	0.55	0	0	0	0	0.09	0.32	0.05	0.11	0.32	0	0	0	0	0	0	0	0	0	0	0	0	0	0	0.24
BnaA01G0178200ZS	48.22	48.26	43.14	0.7	0.13	0.7	0	0.06	0.06	0	0.13	0.05	28.45	19.52	22.02	0.43	0.24	0.16	0	0.06	0	0	0	0	7.67	9.61	7.31	0.38	0.45	0.68	0	0	0	0.06	0.21	0.13	6.08	5.25	5.48	0.07	0.06	0.12	0.19	0.12	0.22	0.22	0.07	0	20.57
BnaA01G0178300ZS	0.07	0	0	0	0	0	0	0	0	0	0	0	0	0	0	0	0.08	0	0	0	0	0	0	0	0	0	0	0	0	0	0	0	0	0	0	0	0	0	0	0.08	0	0.04	0	0	0	0	0	0	0
BnaA01G0178400ZS	0.59	0.69	0.74	0.67	0.82	0.98	0.77	0.53	1.12	0.6	0.76	1.15	2.42	1.94	1.48	1.65	2.06	2.92	1.34	1.25	0.68	1	0.52	1	0.3	0.8	0.22	0.74	2.01	1.82	0.43	0.96	0.52	0.56	0.82	0.86	0.66	0.58	1.58	1.45	1.14	1.15	1.31	0.83	0.74	1.07	0.88	0.4	1.22
BnaA01G0178500ZS	0	0	0	0	0	0	0	0	0	0	0	0	0	0	0	0	0	0	0	0	0	0	0	0	0	0	0	0	0	0	0	0	0	0	0	0	0	0	0	0	0	0	0	0	0	0	0	0	0
BnaA01G0178600ZS	0.05	0.03	0.11	0.05	0.03	0	0.46	0.51	0.59	0.55	0.59	0.4	0.06	0.15	0.11	0.05	0.09	0.01	0.18	0.14	0.09	0.3	0.24	0.1	0.11	0.19	0.11	0.06	0.04	0.1	0.44	0.48	0.44	0.22	0.06	0.25	0.11	0.3	0.12	0.07	0	0.08	0.23	0	0.07	0.32	0.19	0.57	0.21
BnaA01G0178700ZS	0	0	0.4	0	0.14	0.06	0.07	0	0	0	0	0	0.54	0.24	0.79	0.53	0.4	0.06	0	0.47	0.07	0	0	0	0	0	0	0	0	0	0	0.07	0.08	0	0	0.07	0.22	0.2	0.28	0.07	0	0.07	0.14	0.07	0.16	0	0.3	0.24	0.45
BnaA01G0178800ZS	0.07	0	0	0	0	0	0	0	0	0	0	0	0	0.12	0	0	0	0.06	0	0	0	0	0	0	0	0	0	0	0	0	0	0	0	0	0	0	0	0	0	0	0	0	0	0	0	0	0	0	0
BnaA01G0178900ZS	0	0	0.06	0	0.07	0	0.03	0.07	0	0.09	0.17	0.06	0.07	0.09	0.11	0.13	0	0	0.05	0	0	0.08	0.1	0.15	0.1	0	0	0.27	0.12	0.58	0.07	0.03	0.47	0.06	0	0.11	0	0	0	0.3	0.5	0.52	0.17	0.03	0.15	0	0	0	0.08
BnaA01G0179000ZS	0.96	0.82	0.81	0.8	0.35	0.57	0.82	0.68	0.65	0.64	0.9	0.76	1.42	1.02	0.85	1.13	1.15	1.07	0.69	0.39	0.6	0.67	0.69	0.81	0.48	0.74	0.36	0.91	0.54	0.87	0.54	0.27	0.38	0.62	0.43	1.17	0.54	1.03	0.81	0.99	0.77	0.62	0.45	0.63	0.86	0.52	0.69	0.51	1.51
BnaA01G0179100ZS	0	0	0	0	0	0	0	0	0	0	0	0	0	0	0	0.24	0	0	0	0	0	0	0	0	0	0	0	0	0	0	0	0	0	0	0	0	0	0	0	0	0	0	0	0	0	0.27	0	0	0
BnaA01G0179200ZS	0	0	0	0	0	0	0	0	0	0	0	0	0	0.16	0.17	0	0.2	0.15	0.36	0	0.04	0	0	0	0	0	0	0.42	0	0	0	0	0.29	0	0.12	0.15	0	0	0	0.27	0	0.39	0.41	0	0	0	0	0	0
BnaA01G0179300ZS	0.07	0.27	0.17	0.66	0.29	0.47	0	0	0	0	0	0	0.31	0.15	0.15	0.55	0.41	0.55	0.09	0.03	0.07	0	0	0	0.31	0.14	0.27	0.32	0.57	0.29	0	0	0.04	0	0	0	0.11	0.19	0.28	0.31	0.42	0.24	0	0.03	0	0	0	0	0.17
BnaA01G0179400ZS	4.36	2.74	2.33	0.97	1.66	2.77	1.73	3.06	2.47	1.49	2.78	1.78	1.21	2.95	1.26	1.67	0.59	1.93	1.41	0.72	1.84	2.57	2.35	2.94	4.29	4.08	4.3	5.6	4.24	4.65	2.71	3.57	3.05	5.15	5.18	4.93	1.55	2.41	2.1	3.17	2.4	2.46	1.76	1.55	2.32	3.24	3.71	4.71	3.55
BnaA01G0179500ZS	0	0	0	0	0	0	0	0	0	0	0	0	0	0	0	0	0	0	0	0	0	0	0	0	0	0	0	0	0	0	0	0	0	0	0	0	0	0	0	0	0	0	0	0.05	0	0	0	0	0
BnaA01G0179600ZS	0.07	0	0	0	0	0	0	0	0.06	0	0	0	0.12	0.11	0.13	0	0	0	0	0	0	0	0	0.15	0	0	0	0	0	0	0	0	0.07	0	0	0	0.08	0	0	0	0	0	0	0	0	0	0.14	0	0
BnaA01G0179700ZS	6.14	7.56	7.84	6.33	6.67	5.79	5.06	5.4	6.2	5.96	5.09	7.64	7.86	6.29	7.75	7.03	7.22	6.82	3.53	4.24	6.92	4.63	4.92	7.43	7.99	5.73	6	7.12	7.12	5.11	5.85	4.65	6.78	5.5	4.42	5.89	4.33	6.11	7.13	7.84	8.3	4.97	5.85	3.85	4.23	3.9	4.31	3.12	8.81
BnaA01G0179800ZS	0.08	0.06	0.04	0.02	0	0.04	0.05	0	0.02	0.02	0.02	0	0.02	0.1	0.05	0.02	0.04	0.04	0	0	0	0.19	0.02	0.11	0	0.02	0.02	0.05	0.02	0.05	0.1	0	0.19	0	0.03	0.02	0	0	0.02	0.11	0	0	0.02	0.19	0.11	0.02	0.08	0.22	0.08
BnaA01G0179900ZS	6.03	5.65	5.96	2.64	2.2	2.39	2.94	3.47	2.83	5.59	5.41	6.07	6.93	6.73	7.33	3.65	3.86	4.45	4.5	4.08	4.23	9.27	6.44	7.75	4.16	2.66	3.88	4.29	3.65	3.65	3.59	3.56	3.2	4.55	4.99	4.94	3.62	3.88	3.74	4.52	5.18	4.51	3.08	3.04	2.76	9.56	7.05	7.57	6.78
BnaA01G0180000ZS	0	0	0	0	0	0	0	0	0	0	0	0	0	0	0	0	0	0	0	0	0	0	0	0	0	0	0	0	0	0	0	0	0	0	0	0	0	0	0	0	0	0	0	0	0	0	0	0	0
BnaA01G0180100ZS	0.96	0.9	0.33	0.9	0.78	1.26	1.49	0.97	1.65	0.43	0.93	0.96	1.73	1.2	2.08	2.46	3.43	3.56	2.64	1.79	2.2	1.96	1.87	2.32	0.79	0.72	0.79	0.79	0.93	0.87	1.47	0.98	1.33	0.63	1.26	0.38	1.73	1.27	1.45	1.85	2.05	1.87	1.46	1.29	2.18	1.49	1.78	2.49	0.63
BnaA01G0180200ZS	0.09	0.02	0.05	0	0	0.02	0.15	0	0	0	0.02	0.02	0.04	0.05	0.06	0.03	0.08	0.02	0.02	0	0.04	0.06	0	0	0.24	0.11	0.4	0.11	0.04	0.02	0	0.06	0.02	0	0.04	0.08	0.04	0.17	0.02	0	0.1	0	0	0.04	0.02	0.02	0	0	0.12
BnaA01G0180300ZS	6.08	5.99	6.89	3.96	4.45	4.79	3.55	3.56	2.7	2.43	2.36	1.52	11.76	10.85	12.24	10.48	9.7	9.62	7.85	6.25	8.11	6.79	5.45	6.7	5.11	4.9	6.1	5.13	6.65	5.93	3.37	3.62	4.44	2.46	2.77	2.41	7.94	7.84	8.82	8.98	12.42	8.68	6.67	6.24	6.12	4.2	5.49	5.53	5.6
BnaA01G0180400ZS	4.2	1.42	2.59	1.94	2.36	2.46	2.33	2.94	2.21	1.51	1.36	1.65	4.28	3.86	6.04	6.58	6.53	5.43	5.37	6.2	6.11	2.99	5.11	3.99	2.6	1.83	1.02	4.68	4.24	4.53	2.41	2.69	2.79	1.51	1.23	2.15	4.31	4.61	3.32	7.17	6.57	5.43	4.83	2.87	3.45	1.42	3.13	2.84	2.56
BnaA01G0180500ZS	7.25	6.81	7.07	6.43	5.39	6.08	5.52	4.77	4.56	7.17	6.22	5.95	6.74	5.99	8.33	5.98	4.8	5.44	4.26	3.34	3.38	5.83	4.51	5.29	6.18	6.17	5.7	7.84	7.57	7.99	4.86	5.88	5.85	7.26	6.78	6.5	5.9	5.09	5.9	6.09	7.15	6.76	3.39	3.68	4.36	6.06	6.24	6.1	6.87
BnaA01G0180600ZS	0	0.05	0.07	0	0.04	0	0	0.05	0.13	0.1	0	0	0.05	0.15	0.01	0	0	0	0.09	0.13	0.15	0.08	0.09	0	0	0	0	0	0.15	0.04	0.07	0	0.17	0	0	0.08	0.04	0	0	0.04	0	0	0.13	0.08	0.05	0	0.04	0	0
BnaA01G0180700ZS	12.21	13.1	15.97	3.37	2.98	2.85	5.56	4.66	3.42	5.58	5.16	4.46	14.4	15.78	13.63	3.06	3.01	3.73	3.73	4.87	5.45	3.98	4.63	4.59	8.64	8.46	9.67	4.09	3.99	4.33	2.92	2.44	3.04	3.36	3.12	2.1	11.47	8.83	9.23	3.77	3.78	3.37	1.87	3.11	2.57	2.21	3.11	2.73	9.14
BnaA01G0180800ZS	6.51	4.63	5.97	5.15	6.23	4.56	5.38	5.28	4.92	3.38	3.02	4.29	10.85	11.03	12.94	14.96	13.77	15.59	12.37	10.09	10.4	8.62	8.04	9.05	5.3	4.44	6.22	5.16	5.3	6.57	3.53	3.71	3.21	2.91	2.8	3.57	10.38	8.13	8.04	9.52	10.42	9.29	9.12	8.49	9.36	7.29	7.76	8.27	5.21
BnaA01G0180900ZS	0.04	0.16	0	0	0	0	0	0	0	0	0	0	0.81	0.55	0.69	0	0	0	0	0	0	0	0	0	0.05	0	0	0.09	0	0	0.05	0.05	0.06	0	0	0	0.31	0.32	0.5	0.1	0.04	0	0.24	0.05	0.27	0	0.05	0.17	0.15
BnaA01G0181000ZS	3.13	2.82	2.69	1.62	2.33	1.52	2.02	1.72	0.67	0.92	0.98	1.52	1.59	0.9	2.29	0.81	0.79	0.47	0.75	0.74	1.88	1.36	2.02	2.01	0.67	2.69	1.86	1.65	2.45	1.61	0.75	0.95	1.29	0.52	0.45	0	1.45	2.71	1.17	2.24	1.9	1.45	0.99	1.14	0	0.17	0.58	1.07	2.68
BnaA01G0181100ZS	2.25	0.67	0.79	0	0.61	0	0	0	0	0	0	0	0	0	0	0	2.06	0	0	0.08	0	0	0	0	0	0	0	0.11	0.02	0.36	0.08	0	0.11	0.09	0.07	0	1.04	0	0	0	0.09	0.25	0	0	0	0	0	0	0
BnaA01G0181200ZS	0.56	0.39	0.9	0.32	0.39	0.68	0.22	0.43	0.27	0.6	0.38	0.69	0.22	0.07	0.08	0.45	0.26	0.13	0.42	0.29	0.07	0.06	0.13	0.17	0.51	0.63	1.13	0.22	0.6	0.33	0.39	0.38	0.52	0.29	0.65	0.32	0	0.22	0.23	0.07	0.14	0.07	0.33	0	0.26	0.41	0.33	0.09	0.33
BnaA01G0181300ZS	0.31	0.43	0.49	2.32	2.69	2.48	0.2	0.09	0.09	0	0.13	0.06	1.23	0.86	0.82	2.98	2.79	2.96	0.35	0.18	0.41	0.02	0.08	0	0.58	0.53	0.53	1.85	1.56	1.76	0.18	0.33	0.15	0.03	0.02	0	0.4	0.69	0.64	1.4	1.32	1.41	0.23	0.32	0.29	0.04	0	0.13	0.59
BnaA01G0181400ZS	0	0	0.18	0.08	0.37	0	0.27	0	0	0	0	0	0.18	0	0	0.08	0.18	0	0	0	0	0	0	0	0	0.09	0	0	0	0.2	0	0	0.21	0	0	0	0	0	0.09	0.18	0	0.09	0	0	0	0.1	0	0	0.2
BnaA01G0181500ZS	1.19	1.56	1.31	1.83	1.4	1.42	0.2	0.13	0.17	0.2	0.11	0.11	1.5	1.88	1.6	1.26	1.78	1.32	0.21	0.29	0.2	0.21	0.1	0.16	1	1.15	1.32	0.88	0.89	1.01	0.15	0.12	0.24	0.1	0.12	0.42	1.03	1.23	1.05	0.77	0.73	0.84	0.12	0.09	0.19	0.09	0.01	0.1	1.35
BnaA01G0181600ZS	3.91	6.59	3.83	3.25	3.3	2.52	2.42	2.41	2.2	0.87	0.8	0.43	4.76	5.56	8.7	4.95	3.78	3.78	1.9	2.35	4.11	2.1	1.03	1.49	4.25	4.93	2.71	3.24	3.33	2.87	2.59	1.94	2.08	1.73	1.02	1.52	4.27	4.5	4.5	3.26	4.38	2.88	2.85	2.15	2.06	1.6	1.75	1.28	6.16
BnaA01G0181700ZS	0.14	0.2	0.19	0.15	0.13	0.13	0.11	0.13	0.28	0.29	0.13	0.29	0.16	0.37	0.19	0.23	0.19	0.06	0.07	0.02	0.07	0.35	0.21	0.5	0.27	0.25	0.24	0.13	0.09	0.18	0.06	0.07	0.13	0.07	0.06	0.21	0.27	0.28	0.15	0.16	0.05	0.12	0	0.04	0.08	0.22	0.22	0.17	0.24
BnaA01G0181800ZS	0	0	0	0	0	0	0	0	0	0	0	0	0	0	0	0.06	0	0.02	0	0	0	0	0	0	0	0	0	0	0	0	0	0	0	0.11	0.03	0.12	0	0	0	0	0	0	0	0	0	0.02	0	0	0
BnaA01G0181900ZS	0	0.13	0.29	0	0	0	0	0	0	0	0	0	0	0	0	0	0	0	0.12	0	0	0	0.27	0	0	0	0	0	0	0	0	0	0	0	0	0	0	0	0	0	0	0	0	0	0	0	0	0	0
BnaA01G0182000ZS	0	0	0	0	0	0	0	0	0	0	0	0	0	0	0	0	0	0	0	0	0	0	0	0	0	0	0	0	0	0	0	0	0	0	0	0	0	0	0	0	0	0	0	0	0	0	0	0	0
BnaA01G0182100ZS	0	0.06	0	0	0	0	0	0	0	0	0	0	0	0	0	0	0	0	0	0	0	0	0	0	0	0	0	0.05	0	0.08	0	0	0	0	0	0	0	0	0.04	0.02	0	0	0.05	0	0	0	0	0	0.17
BnaA01G0182200ZS	0	0	0	0.28	0	0	0	0.29	0	0.08	0	0	0	0	0	0	0	0	0	0	0	0	0	0	0	0	0	0	0.12	0	0	0	0	0	0	0	0	0	0	0	0	0	0	0	0	0	0	0	0.14
BnaA01G0182300ZS	0	0	0	0	0	0	0	0	0	0	0	0	0	0	0	0	0	0	0	0	0	0	0	0	0	0	0	0	0	0	0	0	0	0	0	0	0	0	0	0	0	0	0	0	0	0	0	0	0
BnaA01G0182400ZS	10.55	10.91	11.01	2.47	2.8	3.02	2.54	2.63	2.69	2	1.92	2.25	13.28	12.62	14.08	4.09	3.48	4.32	2.8	2.85	2.95	1.84	2.52	2.88	7.86	7.85	8.5	12.34	12.27	11.93	2.73	2.95	2.78	2.17	1.56	1.47	7.84	6.56	8.54	10.61	11.64	10.94	3.46	2.52	2.76	2.81	3.19	3.14	16.2
BnaA01G0182500ZS	1.48	1.54	1.44	3.59	3.94	3.31	1.18	2.24	1.39	1.33	1.29	1.39	3.84	2.59	2.82	3.3	2.37	3.76	2.28	2.36	1.82	2.53	1.73	4.06	4.14	5.37	4.04	5.09	3.72	3.76	3.44	2.76	3.55	4.22	4.47	3.36	4.07	3.01	3.28	5.62	4.82	3.75	2.46	3.51	2.62	3.05	2.22	3.51	1.33
BnaA01G0182600ZS	0	0	0	0	0	0	0	0	0	0	0	0	0	0	0	0	0	0	0	0	0	0	0	0	0	0	0	0	0	0	0	0	0	0	0	0	0	0	0	0	0	0	0	0	0	0	0	0	0
BnaA01G0182700ZS	2.61	2.52	1.92	0.94	1.02	0.21	0.35	0.73	0.13	0.13	0.24	0.2	41.34	41.19	40.41	28.46	28.9	29.06	21.61	20.65	21.75	24.55	25.19	22.45	1.67	1	1.44	3.17	3.87	2.81	2.04	3.11	2.69	4.46	4.73	6.75	32.79	35.2	35.17	21.09	21.8	21.24	19.45	18.36	19.46	39.36	38.44	38.08	10.27
BnaA01G0182800ZS	0	0	0	0	0.07	0	0.13	0	0	0.11	0	0.05	0	0	0	0	0	0	0	0	0	0.05	0	0	0	0.06	0	0.06	0.07	0	0	0	0	0.12	0.11	0.07	0	0.25	0.27	0	0	0.06	0	0.03	0.07	0	0.07	0.08	0
BnaA01G0182900ZS	21.52	15.25	17.91	22.34	22.71	23.75	24.83	24.2	20.4	25.72	24.26	27.39	13.91	5.38	11.94	12.46	5.12	11.42	17.2	14.09	17.97	19.32	16.52	18.26	16.14	17.04	12.13	17.62	18.27	17.85	18.26	18.26	18.6	10.23	11.7	13.86	12.62	12.34	12.98	18.18	19.54	16.95	12.77	14.88	18.13	8.64	7.47	8.12	16.5
BnaA01G0183000ZS	21.52	15.25	17.91	22.34	22.71	23.75	24.83	24.2	20.4	25.72	24.26	27.39	13.91	5.38	11.94	12.46	5.12	11.42	17.2	14.09	17.97	19.32	16.52	18.26	16.14	17.04	12.13	17.62	18.27	17.85	18.26	18.26	18.6	10.23	11.7	13.86	12.62	12.34	12.98	18.18	19.54	16.95	12.77	14.88	18.13	8.64	7.47	8.12	16.5
BnaA01G0183100ZS	0.79	0.77	0.85	0	0	0	0	0	0	0	0	0	0.47	0.43	0.34	0.02	0	0	0	0	0	0	0	0	0.1	0.04	0.11	0	0	0	0	0	0	0	0	0	0.05	0.15	0.07	0	0	0	0	0	0.05	0	0.02	0	1.83
BnaA01G0183200ZS	0	0	0	0	0	0	0	0	0	0	0	0	0	0	0	0	0	0	0	0	0	0	0	0	0	0	0	0	0	0	0	0	0	0	0	0	0	0	0	0	0	0	0	0	0	0	0	0	0
BnaA01G0183300ZS	36.9	31.57	33.6	56.66	64.41	61.36	29.96	25.79	30.2	40.25	40.98	36.71	67.69	59.89	67.49	74.2	69.76	64.69	55.44	40.98	50.13	49.07	45.54	44.44	41.79	31.66	35.43	29.65	33.14	30	19.84	21.46	24.01	31.84	38.65	37.51	44.3	46.66	59.7	30.34	44	33.69	26.84	21.35	18.91	32.74	29.04	30.36	41.01
BnaA01G0183400ZS	3.24	4.5	2.75	3.27	3.17	2.12	1.79	2.82	3.17	2.12	1.2	2.88	3.6	3.61	3.67	1.95	2.98	2.75	2.15	2.02	1.43	1.01	1.64	3.09	3.1	4.11	4.6	3.26	1.97	2.39	2.14	2.22	2.86	2.29	1.74	2	3.23	2.92	3.24	2.94	1.17	2.11	1.05	1.55	1.69	1.88	1.76	1.01	2.75
BnaA01G0183500ZS	0	0	0.96	1.14	1.55	0	0	0	0.74	0.58	0.37	0	0	0	0.16	0	0.11	0.13	0	0.4	0.05	0.38	0.2	0	0.92	0.83	0.08	0.73	0	1.04	0.81	0	0.12	0.14	1.99	0	0.59	0.46	0.62	0.79	0.41	0.79	0	0.5	0.36	1.56	0.39	0	0.48
BnaA01G0183600ZS	1.3	1.75	2.11	0.9	0.88	0.59	0.49	0	0.62	0.54	0.18	0.12	1.32	1.04	1.52	1.26	1.59	0.94	1.25	0.36	1.33	0.42	0.3	0.56	1.22	0.68	0.81	1.02	0.32	0.56	0.3	0.51	0.64	0.97	0.23	0.16	1.11	1.11	2.67	0.31	1	0.51	0	0.31	1.32	0	0	0.41	0.4
BnaA01G0183700ZS	70.13	68.03	70.06	72.74	80.37	85.47	41.72	40.47	42.6	14.72	13.37	14.2	71.8	69.85	74.08	100.66	86.36	92.38	51.56	44.31	51.19	17.26	16.29	19.04	68.65	64.8	64.04	100.65	99.97	98.14	34.22	33.23	36.47	8.64	8.84	9.3	85.17	83.96	101.88	92.32	115.76	100.45	51.95	47.2	46.58	11.01	13.37	13.4	39.25
BnaA01G0183800ZS	0.11	0	0	0	0	0	0	0	0	0.05	0	0	0	1.89	0.18	0.23	0.3	0.67	0.14	0	0	0.89	0	0	0.06	0	0	0.14	0	0	0	0	0.11	0	0	0	0.65	0	0.03	0.09	0	0.1	0.23	0	0	0	1.28	0	0
BnaA01G0183900ZS	0	0	0	0	0	0	0	0	0	0	0	0	0	0	0	0	0	0	0	0	0	0	0	0	0	0	0	0	0	0	0	0	0	0	0	0	0	0	0	0	0	0	0	0	0	0	0	0	0
BnaA01G0184000ZS	2.82	3.03	3.24	2.31	2.07	1.58	2.5	3.02	2	2.04	2.31	2.04	3.56	3.1	2.62	2.96	2.6	2.85	2.25	2.3	2.38	1.56	2.23	2.49	1.97	2.36	2.3	2.59	2.91	2.25	2.32	2.06	2.31	1.25	1.02	1.39	2.28	2.52	2.42	2.77	3.17	2.83	1.81	1.75	1.95	2.31	1.53	1.58	2.68
BnaA01G0184100ZS	0.11	0.09	0.1	0.05	0.13	0	0.06	0	0	0.05	0	0.05	0.22	0.25	0.23	0	0	0.05	0	0	0	0.05	0.05	0.49	0.22	0.1	0.05	0.12	0.33	0.24	0.23	0.28	0.37	0	0.06	0	0.46	0.22	0.25	0.11	0	0.06	0.06	0	0.06	0.27	0.06	0.17	0
BnaA01G0184200ZS	0	0	0	0	0	0	0	0	0	0	0	0	0	0	0	0	0	0	0	0	0	0	0	0	0	0	0	0	0	0	0	0.22	0	0	0	0	0	0	0	0	0	0	0	0	0	0	0	0	0
BnaA01G0184300ZS	2.86	3.81	3.04	6.83	5.46	5.37	5.44	5.47	5.37	3.06	2.89	2.9	3.53	3.16	3.39	8.01	6.37	7.04	6.11	5.37	5.89	2.71	2.94	2.81	4.32	3.87	4.62	4.73	5.08	4.97	3.92	4.36	4.11	2.72	2.46	2.41	2.69	3.15	3.43	5.2	3.8	3.6	3.97	3.55	3.59	3.13	2.41	3.21	2.87
BnaA01G0184400ZS	0	0	0	0	0	0	0	0	0	0	0	0	0.18	0	0	0.21	0	0.11	0	0.06	0	0	0	0	0	0	0	0	0	0	0	0	0.14	0	0	0	0	0	0	0	0.11	0	0	0.06	0	0.07	0	0	0
BnaA01G0184500ZS	0.2	0.55	0.36	0.15	0.25	0.23	14.62	14.79	12.64	6.67	5.31	5.81	0.16	0.18	0.34	0.42	0.74	0.25	3.55	4.04	3.67	4.15	2.73	2.7	0.06	0.12	0.11	0.13	0.07	0.27	25.81	28.98	25.23	4.98	7.64	5.88	0.47	0.5	0.33	0.48	0.3	0.1	7.53	9.3	8.34	6.63	7.47	6.27	0.18
BnaA01G0184600ZS	0	0.2	0.06	0	0	0	0	0	0	0	0	0	0.11	0.1	0	0.2	0	0	0	0.06	0	0	0	0	0.06	0.16	0	0	0	0	0	0	0	0	0	0	0	0	0	0	0	0	0	0	0	0	0	0	0
BnaA01G0184700ZS	0.84	0.79	0.86	0.61	0.6	0.43	1.13	0.66	1.1	0.37	0.24	0.3	1.11	1.25	0.68	0.92	0.58	0.96	1.06	0.87	0.99	0.55	0.57	0.59	0.87	0.33	1.25	0.54	1.09	0.97	0.93	0.66	0.69	0.23	0.58	0.57	0.61	0.87	0.37	0.64	0.5	0.4	1.41	1.5	1.58	0.58	0.72	0.63	0.84
BnaA01G0184800ZS	0.97	1.21	0.76	1.26	1.82	1.53	1.73	1.87	2.03	1.62	1.49	1.63	1.47	1.88	1.86	2.58	2.7	2.78	3.27	3.56	3.23	2.58	2.92	2.27	1.12	1.05	1.45	0.53	0.44	0.76	1.21	1.43	1.59	1.38	1.13	0.72	1.67	1.8	2.09	0.88	1.64	1.13	1.86	1.91	1.89	1.12	1.27	1.15	0.6
BnaA01G0184900ZS	0	0	0	0.06	0	0	0	0	0	0	0	0	0	0	0	0	0	0	0	0	0	0	0.07	0	0.07	0	0	0	0	0	0	0	0	0	0	0	0	0	0	0	0	0	0.07	0	0	0.08	0	0	0.08
BnaA01G0185000ZS	0	0	0	0	0	0	0	0	0	0	0	0	0	0	0	0	0	0.2	0	0.22	0.11	0	0	0	0	0	0	0	0.12	0.37	0	0	0	0	0	0	0	0.11	0	0.11	0	0.11	0	0	0	0	0	0	0
BnaA01G0185100ZS	0	0	0	0	0	0	0	0	0	0	0	0	0	0	0	0	0	0	0	0	0	0	0	0	0	0	0	0	0	0	0	0	0	0	0	0	0	0	0	0	0	0	0	0	0	0	0	0	0
BnaA01G0185200ZS	0	0	0	0	0	0	0	0	0	0	0	0	0	0	0	0	0	0	0	0	0	0	0	0	0	0	0	0	0	0	0	0	0	0	0	0	0	0	0	0	0	0	0	0	0	0	0	0	0
BnaA01G0185300ZS	4.55	6.41	6.01	3.75	3.6	3.21	3.25	3.05	2.09	2.3	2.45	1.98	4.92	7.54	6.17	4.55	2.64	3.23	2.82	2.16	2.91	2.88	1.5	2.13	2.66	4.94	2.53	1.54	2.26	3.89	2.79	3.02	3.53	2.38	2.42	3.87	4.56	3.07	2.83	2.28	1.02	2.72	2.74	2.36	2.95	2.95	2.82	3.38	6.73
BnaA01G0185400ZS	0.32	0.5	0.37	0.97	1.11	1.16	1.07	0.72	1.2	1.49	1.52	1.15	0.91	0.65	0.71	1.21	1.36	1.03	0.97	1.04	1.02	1.58	1.42	1.79	0.31	0.41	0.47	1.35	1.4	1.09	0.43	0.43	0.7	1.11	1.05	1.01	0.5	0.69	0.61	1.57	1.99	1.64	0.69	0.79	0.68	1.09	0.98	1.09	0.56
BnaA01G0185500ZS	0	0	0	0	0	0	0	0	0	0	0	0	0	0	0	0	0	0	0	0	0	0	0	0	0	0	0	0	0	0	0	0	0	0	0	0	0	0	0	0	0	0	0	0	0	0	0	0	0
BnaA01G0185600ZS	0.37	0.34	0.76	0.13	0.64	0.5	0.16	0.24	0.38	0.49	0.4	0.39	0.16	0.56	0.83	0.21	0.46	0.2	0.38	0	0	0.07	0	0.3	0.38	0.59	1.07	0.48	0.4	0.61	0.16	0.4	0.28	0.15	0	0.42	0.26	0.31	0	0.78	0.25	0.63	0.08	0.23	0.27	0.17	0.26	0.09	0.17
BnaA01G0185700ZS	0.32	0.73	0.16	0	0	0	0	0	0	0	0	0	0	0	0.18	0	0	0	0	0	0	0	0	0	0.33	0	0.17	0.17	0.17	0.19	0	0	0	0	0	0	0	0	0.35	0	0.32	0.33	0.17	0	0	0	0	0	0
BnaA01G0185800ZS	0	0.29	0.43	0	0.79	0	0	0.22	0	0	0.33	0	0.22	0.19	0.12	0.19	0.22	0.19	0.27	0.33	0.33	0.19	0.1	0	0.65	0.1	0.33	0.22	0.8	0.97	0.12	0.11	0	0.32	0.24	0	0.12	0.33	1.5	0.44	0.72	0.43	0	0.11	0	0	0	0	0.6
BnaA01G0185900ZS	5.82	6.73	10.39	3.34	6.14	7.93	3.43	3.63	2.38	2.32	0.49	1.09	8.73	8.45	9.4	6.21	7	7.05	1.71	3.04	2.88	1.79	1.01	3.27	9.05	7.04	10.48	9.98	13.88	11.84	2.72	4.27	3.99	2.35	3.03	2.79	9.15	10.21	11.02	11.58	7.74	8.02	3.56	2.22	1.65	2.49	0.72	1.91	5.87
BnaA01G0186000ZS	0	0	0	0	0	0	0	0	0	0	0	0	0	0	0	0	0	0	0	0	0	0	0	0	0	0	0	0	0	0	0	0	0	0	0	0	0	0	0	0	0	0	0	0	0	0	0	0	0
BnaA01G0186100ZS	0	0	0	0	0	0	0	0	0	0	0	0	0	0	0	0	0	0	0	0	0	0	0	0	0	0	0	0.04	0	0	0	0	0	0	0	0	0	0	0	0	0	0.09	0	0	0	0	0	0	0
BnaA01G0186200ZS	0.19	0	0.2	0	0.42	0.37	0.21	0.21	0	0.91	0	0.52	0.2	0.54	0.43	0	0	0	0.5	0	0	1.56	0	0.79	0	0	0	0.21	0.42	0	0	0	0	0	0	0	0	0	0.21	0	0.19	0	0	0.4	0	0	0	0.24	0
BnaA01G0186300ZS	0	0	0	0	0	0	0	0	0	0	0	0	0	0	0	0	0	0	0	0	0	0	0	0	0	0	0	0	0	0	0	0	0	0	0	0	0	0	0	0	0	0	0	0	0	0	0	0	0
BnaA01G0186400ZS	0	0	0	0	0	0	0	0	0	0	0	0	0	0	0	0	0	0	0	0	0	0	0	0	0	0	0	0	0	0	0	0	0	0	0	0	0	0	0	0	0	0	0	0	0	0	0	0	0
BnaA01G0186500ZS	0	0	0	0	0	0	0	0	0	0	0	0	0	0	0	0	0	0	0	0	0	0	0	0	0	0	0	0	0	0	0	0	0	0	0	0	0	0	0	0	0	0	0	0	0	0	0	0	0
BnaA01G0186600ZS	0	0	0	0	0	0	0	0	0	0	0	0	0	0	0	0	0	0	0	0	0	0	0	0	0	0	0	0	0	0	0	0	0	0	0	0	0	0	0	0	0	0	0	0	0	0	0	0	0
BnaA01G0186700ZS	19.96	15.18	16.54	1.26	1.29	0.87	0	0	0	0.09	0.11	0	8.98	8.23	6.09	0.73	0.71	0.73	0.34	0.1	0.21	0	0	0.08	5.15	9.23	7.44	0.32	0.11	0.35	0.22	0.11	0	0	0.12	0	5.37	6.21	2.86	0.21	0.69	0.51	0	0.1	0.12	0	0	0	15
[truncated: 103,431 more rows]
[truncated: 23 more columns]

## Sheet: lncRNA RPKM
id	CH20-1_fpkm	CH20-2_fpkm	CH20-3_fpkm	CH30-1_fpkm	CH30-2_fpkm	CH30-3_fpkm	CH40-1_fpkm	CH40-2_fpkm	CH40-3_fpkm	CH50-1_fpkm	CH50-2_fpkm	CH50-3_fpkm	CL20-1_fpkm	CL20-2_fpkm	CL20-3_fpkm	CL30-1_fpkm	CL30-2_fpkm	CL30-3_fpkm	CL40-1_fpkm	CL40-2_fpkm	CL40-3_fpkm	CL50-1_fpkm	CL50-2_fpkm	CL50-3_fpkm	YH20-1_fpkm	YH20-2_fpkm	YH20-3_fpkm	YH30-1_fpkm	YH30-2_fpkm	YH30-3_fpkm	YH40-1_fpkm	YH40-2_fpkm	YH40-3_fpkm	YH50-1_fpkm	YH50-2_fpkm	YH50-3_fpkm	YL20-1_fpkm	YL20-2_fpkm	YL20-3_fpkm	YL30-1_fpkm	YL30-2_fpkm	YL30-3_fpkm	YL40-1_fpkm	YL40-2_fpkm	YL40-3_fpkm	YL50-1_fpkm	YL50-2_fpkm	YL50-3_fpkm	ZH20-1_fpkm
[truncated: 25,455 more rows]
[truncated: 23 more columns]

[truncated: 1 more sheets: mRNAs&lncRNAs-FPKM≥5,10,20]
