# Supplementary material for: Integrated Analysis of lncRNA–mRNA Regulatory Networks Related to Lipid Metabolism in High-Oleic-Acid Rapeseed
Source: Int J Mol Sci. 2023 Mar 27;24(7):6277. doi: 10.3390/ijms24076277 (PMC10093948; doi:10.3390/ijms24076277)
Supplement: Supplementary file 1 [file ijms-24-06277-s001.zip › Supplementary Table S3.xlsx]

## Sheet: index
Supplementary table S3 Statistics for different types of lncRNA–mRNA associations
Statistical summary: Statistical summary of three types of lncRNA-mRNA relationship pairs
antisense_diff: Differentially expressed lncRNAs and the corresponding antisense-regulated target genes.
cis_diff.annot: Differentially expressed lncRNAs and the corresponding cis-regulated target genes.
trans_ diff.annot:: Differentially expressed lncRNAs and the corresponding trans-regulated target genes.

## Sheet: Statistical summary
Statistical summary of three types of lncRNA-mRNA relationship pairs
Types		lncRNA	mRNA	Pairs
antisense	all	6920	6494	7098
	diff	834	783	848
cis	all	22346	44603	68907
	diff	5744	7585	9996
trans	diff	1501	3367	33585

## Sheet: antisense_diff. annot
lncRNA	mRNA	Symbol	Description
MSTRG.100233.1	BnaC09G0343400ZS	--	BnaC09g28400D [Brassica napus]
MSTRG.101106.1	BnaC09G0432400ZS	UFC	protein UPSTREAM OF FLC-like [Brassica napus]
MSTRG.101161.1	BnaC09G0437600ZS	LECRK18	L-type lectin-domain containing receptor kinase I.8 [Brassica napus]
MSTRG.101379.1	BnaC09G0457900ZS	PMEI3	pectinesterase inhibitor 3 [Brassica napus]
MSTRG.101540.1	BnaC09G0472300ZS	Gpaa1	glycosylphosphatidylinositol anchor attachment 1 protein-like [Brassica napus]
MSTRG.101651.1	BnaC09G0482900ZS	--	BnaC09g54210D [Brassica napus]
MSTRG.101655.1	BnaC09G0483400ZS	At3g03980	NADPH-dependent aldehyde reductase-like protein, chloroplastic [Brassica napus]
MSTRG.101670.1	BnaC09G0484800ZS	DRT101	phosphoacetylglucosamine mutase-like [Brassica napus]
MSTRG.101701.1	MSTRG.101700	B3GALT3	probable beta-1,3-galactosyltransferase 3 isoform X2 [Eutrema salsugineum]
MSTRG.101775.1	BnaC09G0494200ZS	atad3-b	ATPase family AAA domain-containing protein 3-B-like [Brassica napus]
MSTRG.101875.1	BnaC09G0503000ZS	RAD23C	ubiquitin receptor RAD23c isoform X1 [Brassica napus]
MSTRG.102023.1	BnaC09G0517600ZS	truB	Pseudouridine synthase family protein [Arabidopsis thaliana]
MSTRG.102062.1	BnaC09G0521100ZS	At5g14050	U3 small nucleolar RNA-associated protein 18 homolog [Brassica napus]
MSTRG.10235.1	BnaA02G0360500ZS	HTR2	PREDICTED: histone H3.2 [Musa acuminata subsp. malaccensis] [Musa acuminata]
MSTRG.102410.2	BnaC09G0553800ZS	DTX28	protein DETOXIFICATION 28 isoform X1 [Brassica napus]
MSTRG.102464.1	BnaC09G0558200ZS	--	BnaC09g46650D [Brassica napus]
MSTRG.102668.1	BnaC09G0575900ZS	gatA	PREDICTED: glutamyl-tRNA(Gln) amidotransferase subunit A isoform X1 [Brassica oleracea var. oleracea] [Brassica oleracea]
MSTRG.102694.1	BnaC09G0578700ZS	NEN1	PREDICTED: protein NEN1 [Brassica oleracea var. oleracea] [Brassica oleracea]
MSTRG.102698.1	BnaC09G0579000ZS	At5g06940	PREDICTED: probably inactive leucine-rich repeat receptor-like protein kinase At5g06940 [Brassica oleracea var. oleracea] [Brassica oleracea]
MSTRG.102803.1	BnaC09G0588400ZS	ROPGEF5	rop guanine nucleotide exchange factor 5-like [Brassica napus]
MSTRG.10289.1	BnaA02G0366900ZS	--	nardilysin-like isoform X1 [Brassica napus]
MSTRG.10300.1	BnaA02G0367800ZS	Ide	nardilysin-like isoform X1 [Brassica napus]
MSTRG.10331.1	BnaA02G0370000ZS	At5g28300	trihelix transcription factor GTL2 [Brassica rapa]
MSTRG.10389.1	MSTRG.10388	TGG1	myrosinase, partial [Brassica rapa subsp. pekinensis] [Brassica rapa]
MSTRG.10390.1	MSTRG.10388	TGG1	myrosinase, partial [Brassica rapa subsp. pekinensis] [Brassica rapa]
MSTRG.10542.1	MSTRG.10543	At5g23370	BnaC02g41660D [Brassica napus]
MSTRG.10634.1	BnaA02G0399800ZS	PMEI11	pectinesterase inhibitor 11-like [Brassica napus]
MSTRG.10682.1	BnaA02G0403200ZS	GASA1	gibberellin-regulated protein 1-like [Brassica napus]
MSTRG.10851.1	BnaA02G0418400ZS	--	-
MSTRG.10885.2	BnaA03G0000600ZS	MAN6	BnaA03g00090D [Brassica napus]
MSTRG.11017.1	BnaA03G0011700ZS	CTR1	serine/threonine-protein kinase CTR1-like [Brassica napus]
MSTRG.11068.1	BnaA03G0016500ZS	RPS17B	40S ribosomal protein S17-2 [Brassica rapa]
MSTRG.11070.1	BnaA03G0016600ZS	PCMP-H16	pentatricopeptide repeat-containing protein At5g04780, mitochondrial-like [Brassica napus]
MSTRG.11133.1	BnaA03G0022700ZS	SWA1	protein SLOW WALKER 1 [Brassica napus]
MSTRG.11146.1	BnaA03G0023700ZS	NHL3	NDR1/HIN1-like protein 3 [Brassica napus]
MSTRG.11194.1	BnaA03G0027400ZS	TSN1	ribonuclease TUDOR 1 [Brassica napus]
MSTRG.11209.1	BnaA03G0029400ZS	Zranb3	DNA annealing helicase and endonuclease ZRANB3-like [Brassica napus]
MSTRG.11219.1	BnaA03G0030100ZS	RPA1B	replication protein A 70 kDa DNA-binding subunit B-like [Brassica napus]
MSTRG.11427.1	BnaA03G0047600ZS	HSP17.6	17.6 kDa class II heat shock protein [Brassica rapa]
MSTRG.11570.1	BnaA03G0059600ZS	PNP2	polyribonucleotide nucleotidyltransferase 2, mitochondrial-like [Brassica napus]
MSTRG.11642.1	MSTRG.11641	AtMg01250	similar to reverse transcriptases (PFam: rvt.hmm, score: 60.13) [Arabidopsis thaliana]
MSTRG.12559.1	BnaA03G0146700ZS	OFP2	transcription repressor OFP2-like [Brassica napus]
MSTRG.12642.1	BnaA03G0154800ZS	GT15	probable xyloglucan galactosyltransferase GT15 [Brassica napus]
MSTRG.12660.1	BnaA03G0156600ZS	--	Lycopene beta/epsilon cyclase protein [Arabidopsis thaliana]
MSTRG.12662.1	BnaA03G0156800ZS	GRP23	glycine-rich protein 23 [Brassica rapa]
MSTRG.12843.1	BnaA03G0175900ZS	RPL12B	LOW QUALITY PROTEIN: 50S ribosomal protein L12-2, chloroplastic-like [Brassica rapa]
MSTRG.12864.1	MSTRG.12863	PER21	peroxidase 21 [Brassica rapa]
MSTRG.12894.1	BnaA03G0179900ZS	At1g07660	histone H4 [Zea mays]
MSTRG.12956.2	BnaA03G0185200ZS	WRKY33	probable WRKY transcription factor 33 [Brassica napus]
MSTRG.12966.1	MSTRG.12965	--	BnaA03g17940D [Brassica napus]
MSTRG.13042.1	BnaA03G0193000ZS	PCMP-E33	pentatricopeptide repeat-containing protein At2g39620-like [Brassica napus]
MSTRG.13162.1	BnaA03G0204500ZS	RPS2A	40S ribosomal protein S2-2 [Brassica napus]
MSTRG.13304.1	MSTRG.13303	GATA2	BnaA04g26030D [Brassica napus]
MSTRG.13440.1	BnaA03G0232200ZS	BGAL8	beta-galactosidase 8-like [Brassica napus]
MSTRG.13441.2	BnaA03G0232200ZS	BGAL8	beta-galactosidase 8-like [Brassica napus]
MSTRG.13464.1	BnaA03G0234000ZS	--	glycine-rich cell wall structural protein 1.0-like [Brassica napus]
MSTRG.13467.1	MSTRG.13466	--	hypothetical protein BRARA_H00288 [Brassica rapa]
MSTRG.13554.1	BnaA03G0242700ZS	AHL17	AT-hook motif nuclear-localized protein 17 isoform X2 [Brassica napus]
MSTRG.13598.1	BnaA03G0246200ZS	--	auxin-responsive protein SAUR71 [Brassica napus]
MSTRG.13601.1	MSTRG.13600	MES4	BnaC03g27920D [Brassica napus]
MSTRG.13601.2	MSTRG.13600	MES4	BnaC03g27920D [Brassica napus]
MSTRG.13603.1	MSTRG.13602	MES19	MES4 [Arabidopsis thaliana]
MSTRG.13631.1	BnaA03G0249100ZS	EXO	protein EXORDIUM [Brassica rapa]
MSTRG.13699.1	BnaA03G0253700ZS	HSP22.0	22.0 kDa heat shock protein [Brassica rapa]
MSTRG.13807.1	BnaA03G0263200ZS	ATPC1	ATP synthase gamma chain 1, chloroplastic [Brassica rapa]
MSTRG.13821.1	MSTRG.13820	UBI11	polyubiquitin [Arabidopsis lyrata subsp. lyrata] [Arabidopsis lyrata]
MSTRG.14352.1	MSTRG.14351	RPL35A	BnaA05g28950D [Brassica napus]
MSTRG.14811.1	BnaA03G0355200ZS	ATL77	RING-H2 finger protein ATL77-like [Brassica rapa]
MSTRG.14968.1	BnaA03G0369900ZS	UGT71B7	UDP-glycosyltransferase 71B7 [Brassica napus]
MSTRG.14972.1	BnaA03G0370500ZS	TPRP-F1	36.4 kDa proline-rich protein-like [Brassica napus]
MSTRG.14972.2	BnaA03G0370500ZS	TPRP-F1	36.4 kDa proline-rich protein-like [Brassica napus]
MSTRG.15243.1	BnaA03G0393900ZS	GASA7	gibberellin-regulated protein 7 [Brassica napus]
MSTRG.15248.1	BnaA03G0394600ZS	DIR6	dirigent protein 6-like [Brassica napus]
MSTRG.15566.2	BnaA03G0426500ZS	UGT71B5	UDP-glycosyltransferase 71B5-like isoform X1 [Brassica napus]
MSTRG.15566.3	BnaA03G0426500ZS	UGT71B5	UDP-glycosyltransferase 71B5-like isoform X1 [Brassica napus]
MSTRG.1581.1	MSTRG.1580	At5g58090	PREDICTED: glucan endo-1,3-beta-glucosidase 6-like [Brassica oleracea var. oleracea] [Brassica oleracea]
MSTRG.1581.2	MSTRG.1580	At5g58090	PREDICTED: glucan endo-1,3-beta-glucosidase 6-like [Brassica oleracea var. oleracea] [Brassica oleracea]
MSTRG.15873.1	BnaA03G0458300ZS	At4g20840	berberine bridge enzyme-like 21 [Brassica napus]
MSTRG.16175.1	BnaA03G0487600ZS	LTI65	low-temperature-induced 65 kDa protein-like isoform X1 [Brassica napus]
MSTRG.16271.1	BnaA03G0496300ZS	NAP1	napin-B-like [Brassica napus]
MSTRG.16273.1	BnaA03G0496500ZS	AT2S3	napin-1A-like [Brassica napus]
MSTRG.16293.1	BnaA03G0498200ZS	PPI1	proton pump-interactor 1 [Brassica rapa]
MSTRG.16428.1	BnaA03G0511600ZS	CDA6	cytidine deaminase 6 [Brassica rapa]
MSTRG.16583.1	BnaA03G0525300ZS	--	BnaA03g51420D [Brassica napus]
MSTRG.16794.1	BnaA03G0544700ZS	At4g34480	BnaA03g52860D [Brassica napus]
MSTRG.17501.1	BnaA04G0016600ZS	NRG2	nitrate regulatory gene2 protein [Brassica rapa]
MSTRG.17635.1	BnaA04G0029000ZS	At3g57470	insulin-degrading enzyme-like 2 [Brassica napus]
MSTRG.17850.1	BnaA04G0052400ZS	UVR8	ultraviolet-B receptor UVR8 isoform X1 [Brassica napus]
MSTRG.18090.1	MSTRG.18089	--	BnaC01g37800D [Brassica napus]
MSTRG.18188.1	BnaA04G0086000ZS	AtMg01280	orf195 [Brassica oleracea var. botrytis] [Brassica oleracea]
MSTRG.18323.1	BnaA04G0099500ZS	--	non-specific lipid-transfer protein 2-like [Brassica rapa]
MSTRG.18439.1	BnaA04G0110900ZS	At5g39865	BnaA04g27830D [Brassica napus]
MSTRG.18503.1	BnaA04G0117400ZS	At5g40400	pentatricopeptide repeat-containing protein At5g40400 [Brassica rapa]
MSTRG.18558.1	BnaA04G0123000ZS	DRB5	double-stranded RNA-binding protein 5-like [Brassica napus]
MSTRG.18681.1	BnaA04G0135000ZS	DEGP9	protease Do-like 9 [Brassica napus]
MSTRG.18720.1	BnaA04G0138500ZS	SRS3	BnaA04g12150D [Brassica napus]
MSTRG.18720.2	BnaA04G0138500ZS	SRS3	BnaA04g12150D [Brassica napus]
MSTRG.18768.1	BnaA04G0142800ZS	UBA1B	UBP1-associated proteins 1B-like [Brassica napus]
MSTRG.18806.1	BnaA04G0147000ZS	--	extensin-like [Brassica rapa]
MSTRG.18894.1	MSTRG.18893	MES4	methylesterase 4 isoform X2 [Brassica rapa]
MSTRG.18990.1	BnaA04G0163200ZS	At2g24580	probable sarcosine oxidase [Brassica napus]
MSTRG.19033.1	BnaA04G0167300ZS	AKT1	potassium channel AKT1 isoform X1 [Brassica napus]
MSTRG.19033.2	BnaA04G0167300ZS	AKT1	potassium channel AKT1 isoform X1 [Brassica napus]
MSTRG.19087.1	MSTRG.19086	CNGC12	probable cyclic nucleotide-gated ion channel 12 [Brassica napus]
MSTRG.19128.1	BnaA04G0175400ZS	NHL13	NDR1/HIN1-like protein 13 [Brassica rapa]
MSTRG.19220.1	MSTRG.19219	--	hypothetical protein BRARA_D00266 [Brassica rapa]
MSTRG.19343.1	BnaA04G0195600ZS	CIPK11	CBL-interacting serine/threonine-protein kinase 11-like [Brassica napus]
MSTRG.19345.1	BnaA04G0195600ZS	CIPK11	CBL-interacting serine/threonine-protein kinase 11-like [Brassica napus]
MSTRG.1944.1	MSTRG.1943	CRU1	BnaC01g09900D [Brassica napus]
MSTRG.19495.1	BnaA04G0209800ZS	CSLB3	cellulose synthase-like protein B3 isoform X1 [Brassica rapa]
MSTRG.19576.1	BnaA04G0218700ZS	--	transmembrane protein [Arabidopsis thaliana]
MSTRG.19849.1	MSTRG.19848	WAX9B	non-specific lipid-transfer protein B isoform X1 [Brassica rapa]
MSTRG.20025.2	BnaA04G0264500ZS	DDB_G0268948	S-adenosyl-L-methionine-dependent methyltransferases superfamily protein [Arabidopsis thaliana]
MSTRG.2004.2	BnaA01G0003300ZS	DTX47	protein DETOXIFICATION 47, chloroplastic [Brassica rapa]
MSTRG.2004.3	BnaA01G0003300ZS	DTX47	protein DETOXIFICATION 47, chloroplastic [Brassica rapa]
MSTRG.20134.1	MSTRG.20131	--	PREDICTED: extensin-2-like [Brassica oleracea var. oleracea] [Brassica oleracea]
MSTRG.20399.1	BnaA04G0299000ZS	PME20	BnaA04g27070D [Brassica napus]
MSTRG.20441.1	BnaA05G0002100ZS	TSPO	translocator protein homolog [Brassica rapa]
MSTRG.20498.1	BnaA05G0007400ZS	SAMS2	S-adenosylmethionine synthase 2 [Brassica rapa]
MSTRG.2058.1	BnaA01G0008800ZS	PCMP-E98	pentatricopeptide repeat-containing protein At4g39952, mitochondrial [Brassica rapa]
MSTRG.20585.1	MSTRG.20583	--	BnaCnng50740D [Brassica napus]
MSTRG.20650.1	BnaA05G0024300ZS	CML35	probable calcium-binding protein CML35 [Brassica napus]
MSTRG.2067.1	MSTRG.2066	HTR4	histone H3.3 [Capsicum annuum]
MSTRG.20687.1	BnaA05G0027600ZS	RPS2C	40S ribosomal protein S2-3 [Brassica napus]
MSTRG.20694.1	MSTRG.20695	--	BnaC05g40040D [Brassica napus]
MSTRG.20694.2	MSTRG.20695	--	BnaC05g40040D [Brassica napus]
MSTRG.2071.1	BnaA01G0009700ZS	SCAI	protein SCAI-like [Brassica napus]
MSTRG.20756.1	BnaA05G0034900ZS	PRS4	ribose-phosphate pyrophosphokinase 4-like [Brassica napus]
MSTRG.20756.2	BnaA05G0034900ZS	PRS4	ribose-phosphate pyrophosphokinase 4-like [Brassica napus]
MSTRG.20799.2	BnaA05G0038800ZS	KAI2	probable esterase KAI2 [Brassica napus]
MSTRG.20919.1	BnaA05G0050700ZS	BOP1	ribosome biogenesis protein BOP1 homolog [Brassica napus]
MSTRG.21041.1	BnaA05G0061400ZS	HSPRO2	nematode resistance protein-like HSPRO2 [Brassica napus]
MSTRG.21126.1	BnaA05G0068600ZS	JMJ19	probable inactive lysine-specific demethylase JMJ19 isoform X1 [Brassica napus]
MSTRG.21162.1	BnaA05G0071400ZS	IREG1	solute carrier family 40 member 1 isoform X1 [Brassica napus]
MSTRG.21263.1	BnaA05G0080300ZS	ABCG33	PREDICTED: ABC transporter G family member 33-like [Brassica oleracea var. oleracea] [Brassica oleracea]
MSTRG.21337.1	MSTRG.21338	At1g58390	probable disease resistance RPP8-like protein 2 [Brassica napus]
MSTRG.21353.1	BnaA05G0087100ZS	ABI5	protein ABSCISIC ACID-INSENSITIVE 5 isoform X1 [Brassica napus]
MSTRG.21441.1	BnaA05G0095900ZS	PIGC	BnaA05g08920D [Brassica napus]
MSTRG.21647.1	BnaA05G0115500ZS	--	COP1-interactive protein 1 [Brassica rapa]
MSTRG.21670.1	BnaA05G0117600ZS	MAPKKK17	mitogen-activated protein kinase kinase kinase 3-like [Brassica napus]
MSTRG.21687.1	BnaA05G0118800ZS	PURA1	transcription factor Pur-alpha 1 [Brassica napus]
MSTRG.21719.1	BnaA05G0122600ZS	THG1	tRNA(His) guanylyltransferase 1-like [Brassica napus]
MSTRG.2178.1	BnaA01G0018900ZS	HHO5	transcription factor HHO5-like [Brassica napus]
MSTRG.21848.1	BnaA05G0136300ZS	At2g30020	probable protein phosphatase 2C 25 isoform X2 [Brassica rapa]
MSTRG.21903.1	BnaA05G0141400ZS	At2g29380	BnaA05g12650D [Brassica napus]
MSTRG.21949.1	BnaA05G0146000ZS	--	BnaA05g13060D [Brassica napus]
MSTRG.2205.1	BnaA01G0021100ZS	--	At4g36660 [Arabidopsis lyrata subsp. lyrata] [Arabidopsis lyrata]
MSTRG.22195.2	BnaA05G0170800ZS	At1g51745	BnaA05g15350D [Brassica napus]
MSTRG.22289.1	BnaA05G0178900ZS	--	BnaCnng72810D [Brassica napus]
MSTRG.2260.1	BnaA01G0025600ZS	CaMKMT	calmodulin-lysine N-methyltransferase-like [Brassica napus]
MSTRG.2319.1	BnaA01G0031300ZS	--	nitrate regulatory gene2 protein [Brassica rapa]
MSTRG.23535.1	BnaA05G0321000ZS	--	Wound-responsive family protein [Arabidopsis thaliana]
MSTRG.23619.1	BnaA05G0330100ZS	PCMP-A1	pentatricopeptide repeat-containing protein At1g31790-like [Brassica napus]
MSTRG.23619.1	BnaA05G0330200ZS	At2g02030	BnaC05g34900D [Brassica napus]
MSTRG.23725.1	BnaA05G0338800ZS	TPRP-F1	36.4 kDa proline-rich protein [Brassica rapa]
MSTRG.2386.1	BnaA01G0036200ZS	SH3P2	SH3 domain-containing protein 2 [Brassica rapa]
MSTRG.2390.1	BnaA01G0036700ZS	BZIP11	bZIP transcription factor 11 [Brassica rapa]
MSTRG.24002.1	BnaA05G0364000ZS	AZF2	zinc finger protein AZF2-like [Brassica napus]
MSTRG.24042.1	BnaA05G0368700ZS	TRI1	zinc finger CCCH domain-containing protein 19-like [Brassica napus]
MSTRG.24200.1	BnaA05G0383800ZS	--	late embryogenesis abundant protein, group 3 [Brassica napus]
MSTRG.2423.1	BnaA01G0039700ZS	At4g34220	receptor protein kinase-like protein At4g34220 [Brassica rapa]
MSTRG.2436.1	BnaA01G0040500ZS	UGT73B1	UDP-glycosyltransferase 73B1 [Brassica rapa]
MSTRG.24721.1	BnaA05G0431100ZS	--	BnaA05g27350D [Brassica napus]
MSTRG.24812.1	BnaA05G0438100ZS	--	BnaAnng16550D [Brassica napus]
MSTRG.24870.1	MSTRG.24869	RPP0B	60S acidic ribosomal protein P0-2 [Brassica rapa]
MSTRG.24939.1	BnaA05G0448600ZS	CYP77A4	cytochrome P450 77A4-like [Brassica napus]
MSTRG.24943.1	BnaA05G0449100ZS	Neurl1b	BnaA05g28350D [Brassica napus]
MSTRG.24945.1	BnaA05G0449100ZS	Neurl1b	BnaA05g28350D [Brassica napus]
MSTRG.24966.1	BnaA05G0450600ZS	LTP6	BnaA05g29430D [Brassica napus]
MSTRG.24990.1	BnaA05G0452600ZS	CHC2	clathrin heavy chain 2-like [Brassica napus]
MSTRG.25053.1	MSTRG.25052	--	BnaA05g30260D [Brassica napus]
MSTRG.25100.1	BnaA05G0463000ZS	IBR3	probable acyl-CoA dehydrogenase IBR3 [Brassica napus]
MSTRG.25213.1	BnaA05G0474400ZS	RALFL22	protein RALF-like 22 [Brassica rapa]
MSTRG.25240.1	BnaA05G0476600ZS	ERCC1	DNA excision repair protein ERCC-1 [Brassica rapa]
MSTRG.25304.1	BnaA05G0481300ZS	RALFL3	BnaAnng10580D [Brassica napus]
MSTRG.25331.1	BnaA05G0483200ZS	RPS16C	40S ribosomal protein S16-3 [Brassica rapa]
MSTRG.25382.1	BnaA05G0488100ZS	atad-3	ATPase family AAA domain-containing protein 3-A [Brassica rapa]
MSTRG.25413.1	BnaA05G0491100ZS	PUB21	U-box domain-containing protein 21 [Brassica napus]
MSTRG.25472.1	BnaA05G0496400ZS	--	BnaAnng16550D [Brassica napus]
MSTRG.25485.1	MSTRG.25484	--	BnaAnng16550D [Brassica napus]
MSTRG.25602.1	BnaA06G0008200ZS	ASIL1	BnaC06g06860D [Brassica napus]
MSTRG.25687.1	MSTRG.25686	AOP1.2	PREDICTED: probable 2-oxoglutarate-dependent dioxygenase AOP1 [Brassica oleracea var. oleracea] [Brassica oleracea]
MSTRG.25754.1	BnaA06G0023000ZS	EXO70H1	exocyst complex component EXO70A1 [Brassica napus]
MSTRG.25756.1	BnaA06G0023000ZS	EXO70H1	exocyst complex component EXO70A1 [Brassica napus]
MSTRG.25926.1	BnaA06G0038300ZS	--	box C/D snoRNA protein 1-like [Brassica napus]
MSTRG.26129.1	BnaA06G0054000ZS	NFYC3	nuclear transcription factor Y subunit C-9-like [Brassica napus]
MSTRG.26349.1	MSTRG.26348	At1g11410	disease resistance protein [Brassica rapa subsp. pekinensis] [Brassica rapa]
MSTRG.26431.1	BnaA06G0081600ZS	NRS/ER	bifunctional dTDP-4-dehydrorhamnose 3,5-epimerase/dTDP-4-dehydrorhamnose reductase-like [Brassica napus]
MSTRG.26598.1	BnaA06G0097600ZS	KNATM	protein KNATM [Brassica napus]
MSTRG.26727.2	MSTRG.26726	HSP70-5	heat shock 70 kDa protein 5-like [Brassica napus]
MSTRG.26786.1	BnaA06G0114200ZS	--	transmembrane protein [Arabidopsis thaliana]
MSTRG.26902.1	BnaA06G0124500ZS	CML27	probable calcium-binding protein CML27 [Brassica napus]
MSTRG.27075.1	BnaA06G0140200ZS	GLOX	aldehyde oxidase GLOX-like [Brassica napus]
MSTRG.2715.1	BnaA01G0062500ZS	At4g31250	BnaA01g05970D [Brassica napus]
MSTRG.27189.1	MSTRG.27188	EXT3	extensin-3 [Brassica napus]
MSTRG.27221.1	BnaA06G0153500ZS	PTAC6	plastid transcriptionally active 6 [Arabis alpina]
MSTRG.2731.1	BnaA01G0063900ZS	LIP2P	BnaA01g06090D [Brassica napus]
MSTRG.27339.1	BnaA06G0164000ZS	At3g48880	F-box/LRR-repeat protein At3g48880-like isoform X1 [Brassica napus]
MSTRG.2741.2	BnaA01G0064800ZS	CIPK6	CBL-interacting serine/threonine-protein kinase 6-like [Brassica napus]
MSTRG.28063.1	MSTRG.28062	--	PREDICTED: LOW QUALITY PROTEIN: transcription factor bHLH47-like [Brassica oleracea var. oleracea] [Brassica oleracea]
MSTRG.28064.1	MSTRG.28062	--	PREDICTED: LOW QUALITY PROTEIN: transcription factor bHLH47-like [Brassica oleracea var. oleracea] [Brassica oleracea]
MSTRG.28236.1	BnaA06G0264100ZS	MRF4	BnaA06g20900D [Brassica napus]
MSTRG.28408.1	BnaA06G0281500ZS	--	BnaC02g42330D [Brassica napus]
MSTRG.28604.1	BnaA06G0300200ZS	AGL27	agamous-like MADS-box protein AGL27 isoform X1 [Brassica napus]
MSTRG.28929.1	MSTRG.28927	PGL5	probable 6-phosphogluconolactonase 5 [Brassica rapa]
MSTRG.29001.1	BnaA06G0333900ZS	At5g25050	probable folate-biopterin transporter 2 [Brassica napus]
MSTRG.29016.2	BnaA06G0335600ZS	--	serine-rich protein-like protein [Arabidopsis thaliana]
MSTRG.29016.2	BnaA06G0335700ZS	--	hypothetical protein F2Q68_00036745 [Brassica cretica]
MSTRG.29016.3	BnaA06G0335600ZS	--	serine-rich protein-like protein [Arabidopsis thaliana]
MSTRG.29016.3	BnaA06G0335700ZS	--	hypothetical protein F2Q68_00036745 [Brassica cretica]
MSTRG.29102.1	BnaA06G0344700ZS	CpNIFS3	probable L-cysteine desulfhydrase, chloroplastic [Brassica napus]
MSTRG.2916.1	BnaA01G0081000ZS	--	glycine-rich protein 23-like [Brassica napus]
MSTRG.2923.1	BnaA01G0081300ZS	CDKF-1	BnaA01g07940D [Brassica napus]
MSTRG.29477.1	BnaA06G0377800ZS	--	kinesin-1 heavy chain-like isoform X2 [Brassica napus]
MSTRG.2969.1	BnaA01G0086200ZS	ERF6	ethylene-responsive transcription factor 6-like [Brassica rapa]
MSTRG.2969.2	BnaA01G0086200ZS	ERF6	ethylene-responsive transcription factor 6-like [Brassica rapa]
MSTRG.29807.1	BnaA06G0408300ZS	NUDT17	nudix hydrolase 17, mitochondrial [Brassica napus]
MSTRG.29811.1	BnaA06G0408900ZS	HMGA	HMG-Y-related protein A-like isoform X1 [Brassica napus]
MSTRG.29860.1	BnaA06G0413700ZS	At5g47800	BTB/POZ domain-containing protein At5g47800 isoform X1 [Brassica napus]
MSTRG.29863.1	BnaA06G0413800ZS	At5g47790	nuclear inhibitor of protein phosphatase 1-like [Brassica napus]
MSTRG.29963.1	BnaA06G0423800ZS	NOV	BnaA06g35940D [Brassica napus]
MSTRG.30083.1	BnaA06G0433400ZS	Hdhd3	haloacid dehalogenase-like hydrolase domain-containing protein 3 [Brassica rapa]
MSTRG.30392.1	BnaA07G0006400ZS	At2g20020	CRS2-associated factor 1, chloroplastic [Brassica rapa]
MSTRG.31054.1	BnaA07G0072300ZS	NCED6	9-cis-epoxycarotenoid dioxygenase NCED6, chloroplastic [Brassica rapa]
MSTRG.31104.1	BnaA07G0078100ZS	--	RNA-binding (RRM/RBD/RNP motifs) family protein [Arabidopsis thaliana]
MSTRG.31104.2	BnaA07G0078100ZS	--	RNA-binding (RRM/RBD/RNP motifs) family protein [Arabidopsis thaliana]
MSTRG.31334.1	MSTRG.31335	--	hypothetical protein F2Q68_00002024 [Brassica cretica]
MSTRG.31417.1	BnaA07G0111200ZS	At1g27050	homeobox leucine zipper protein [Arabidopsis thaliana]
MSTRG.31497.1	BnaA07G0118000ZS	Tmem214	BnaA07g10090D [Brassica napus]
MSTRG.31535.1	BnaA07G0122300ZS	ATL15	E3 ubiquitin-protein ligase ATL15-like [Brassica napus]
MSTRG.3159.1	BnaA01G0103000ZS	--	Profilin family protein [Arabidopsis thaliana]
MSTRG.31725.1	BnaA07G0141300ZS	CYP81Q32	cytochrome P450 81D1-like [Brassica napus]
MSTRG.32114.1	BnaA07G0180200ZS	--	B2 protein [Brassica rapa]
MSTRG.32533.1	BnaA07G0218300ZS	At4g29360	glucan endo-1,3-beta-glucosidase 12-like [Brassica napus]
MSTRG.3254.1	BnaA01G0112200ZS	--	late embryogenesis abundant protein 1-like [Brassica napus]
MSTRG.32616.1	BnaA07G0225900ZS	AATP1	ADP,ATP carrier protein 1, chloroplastic [Brassica rapa]
MSTRG.3269.1	BnaA01G0113600ZS	--	copper ion-binding protein [Arabidopsis thaliana]
MSTRG.33001.1	BnaA07G0259800ZS	BHLH96	transcription factor bHLH96 isoform X1 [Brassica rapa]
MSTRG.33114.1	BnaA07G0271600ZS	AGO7	protein argonaute 7-like [Brassica napus]
MSTRG.3315.1	BnaA01G0117900ZS	NPF7.2	protein NRT1/ PTR FAMILY 7.2 [Brassica napus]
MSTRG.33202.1	BnaA07G0279700ZS	GCS1	mannosyl-oligosaccharide glucosidase GCS1 [Brassica napus]
MSTRG.33424.1	BnaA07G0302500ZS	XYL1	alpha-xylosidase 1 [Brassica rapa]
MSTRG.33674.1	BnaA07G0326200ZS	--	Rieske (2Fe-2S) domain-containing protein [Arabidopsis thaliana]
MSTRG.33817.1	BnaA07G0337800ZS	KTI3	kunitz trypsin inhibitor 3 [Brassica rapa]
MSTRG.33906.1	BnaA07G0345400ZS	At1g74360	probable LRR receptor-like serine/threonine-protein kinase At1g74360 [Brassica napus]
MSTRG.33907.1	BnaA07G0345400ZS	At1g74360	probable LRR receptor-like serine/threonine-protein kinase At1g74360 [Brassica napus]
MSTRG.34006.1	BnaA07G0352800ZS	WAT1	protein WALLS ARE THIN 1 [Brassica napus]
MSTRG.34252.1	BnaA07G0372100ZS	SPBC2A9.03	uncharacterized WD repeat-containing protein C2A9.03-like isoform X1 [Brassica napus]
MSTRG.34302.1	BnaA07G0376500ZS	BBX22	B-box zinc finger protein 22 [Brassica rapa]
MSTRG.34407.1	BnaA07G0384500ZS	At1g79710	probable folate-biopterin transporter 3 [Brassica napus]
MSTRG.35188.1	BnaA08G0059700ZS	CYP83B1	cytochrome P450 83B1 [Brassica rapa]
MSTRG.35189.1	BnaA08G0059700ZS	CYP83B1	cytochrome P450 83B1 [Brassica rapa]
MSTRG.35208.2	BnaA08G0061600ZS	ycf2-A	Ycf2 [Brassica rapa subsp. rapa] [Brassica rapa]
MSTRG.35208.2	BnaA08G0061700ZS	ycf2-A	BnaA06g19300D [Brassica napus]
MSTRG.35335.1	BnaA08G0073900ZS	--	BnaA08g06760D [Brassica napus]
MSTRG.35339.2	BnaA08G0074200ZS	TAF1	transcription initiation factor TFIID subunit 1 isoform X1 [Brassica napus]
MSTRG.35531.1	MSTRG.35530	TGG2	myrosinase MA1 [Brassica rapa]
MSTRG.35611.1	BnaA08G0100000ZS	CYS4	cysteine proteinase inhibitor 4 [Brassica napus]
MSTRG.35721.1	BnaA08G0108400ZS	PUP10	probable purine permease 10 isoform X2 [Brassica napus]
MSTRG.35750.1	MSTRG.35749	--	meiosis-specific protein ASY2-like [Brassica rapa]
MSTRG.35751.2	BnaA08G0111300ZS	DOGL3	protein DOG1-like 3 [Brassica napus]
MSTRG.36101.1	BnaA08G0145500ZS	--	unnamed protein product [Brassica rapa]
MSTRG.36448.1	BnaA08G0176700ZS	ATJ11	chaperone protein dnaJ 11, chloroplastic-like [Brassica napus]
MSTRG.36690.1	MSTRG.36689	CYP18-3	peptidyl-prolyl cis-trans isomerase CYP18-3 [Brassica rapa]
MSTRG.36712.1	BnaA08G0201000ZS	--	pollen-specific leucine-rich repeat extensin-like protein 2 isoform X1 [Brassica rapa]
MSTRG.36760.1	BnaA08G0205400ZS	At1g30230	elongation factor 1-delta 1 isoform X1 [Brassica rapa]
MSTRG.36807.1	BnaA08G0209200ZS	At1g29470	probable methyltransferase PMT24 [Brassica napus]
MSTRG.36808.1	BnaA08G0209200ZS	At1g29470	probable methyltransferase PMT24 [Brassica napus]
MSTRG.36814.1	BnaA08G0209700ZS	WDR74	WD repeat-containing protein 74-like [Brassica napus]
MSTRG.36888.1	BnaA08G0217400ZS	PUB45	U-box domain-containing protein 45 [Brassica rapa]
MSTRG.36931.1	BnaA08G0221700ZS	--	BnaA08g31110D [Brassica napus]
MSTRG.3718.1	BnaA01G0153200ZS	XTH23	probable xyloglucan endotransglucosylase/hydrolase protein 23 [Brassica rapa]
MSTRG.37510.1	MSTRG.37509	CYP71B2	BnaA08g24420D [Brassica napus]
MSTRG.37558.1	BnaA08G0279400ZS	IRKI	IRK-interacting protein [Brassica napus]
MSTRG.37588.1	BnaA08G0281600ZS	SEC22	25.3 kDa vesicle transport protein [Brassica rapa]
MSTRG.37618.1	BnaA08G0284100ZS	--	BnaA08g25280D [Brassica napus]
MSTRG.37767.6	BnaA08G0296800ZS	--	BnaA08g26650D [Brassica napus]
MSTRG.37847.1	BnaA08G0303000ZS	ATOBGM	probable GTP-binding protein OBGM, mitochondrial [Brassica napus]
MSTRG.37985.1	BnaA08G0315800ZS	TRAF1B	BnaA08g27820D [Brassica napus]
MSTRG.38104.1	BnaA09G0004300ZS	BAM2	beta-amylase 2, chloroplastic-like [Brassica napus]
MSTRG.38247.1	BnaA09G0019200ZS	--	NDR1/HIN1-like protein 12 [Brassica rapa]
MSTRG.38340.1	BnaA09G0026200ZS	TOC159	translocase of chloroplast 159, chloroplastic-like [Brassica napus]
MSTRG.38346.1	BnaA09G0026500ZS	At4g02530	thylakoid lumenal 16.5 kDa protein, chloroplastic [Brassica rapa]
MSTRG.38365.2	BnaA09G0028000ZS	At1g56220	dormancy-associated protein homolog 3-like isoform X2 [Brassica napus]
MSTRG.38386.1	MSTRG.38385	AOP2	probable 2-oxoglutarate-dependent dioxygenase AOP1 isoform X1 [Brassica rapa]
MSTRG.3840.2	BnaA01G0165000ZS	NAP1	napin-like [Brassica rapa]
MSTRG.3840.3	BnaA01G0164900ZS	NAP1	napin-like [Brassica rapa]
MSTRG.3840.3	BnaA01G0165000ZS	NAP1	napin-like [Brassica rapa]
MSTRG.38647.1	BnaA09G0057400ZS	At5g27670	probable histone H2A.5 [Brassica rapa]
MSTRG.3866.2	BnaA01G0166900ZS	NAC072	NAC domain-containing protein 72-like [Brassica napus]
MSTRG.38747.1	BnaA09G0067800ZS	CRK4	BnaA09g04890D [Brassica napus]
MSTRG.38789.1	BnaA09G0072400ZS	--	probable LRR receptor-like serine/threonine-protein kinase At1g34110 [Brassica napus]
MSTRG.38834.1	BnaA09G0076900ZS	CNX1	BnaA09g05810D [Brassica napus]
MSTRG.38936.1	BnaA09G0087500ZS	sf3b1	splicing factor 3B subunit 1-like [Brassica napus]
MSTRG.38991.1	BnaA09G0092400ZS	HSL2	LRR receptor-like serine/threonine-protein kinase HSL2 [Brassica napus]
MSTRG.38993.1	BnaA09G0092500ZS	NIFS1	cysteine desulfurase, mitochondrial isoform X1 [Brassica napus]
MSTRG.39017.1	BnaA09G0095400ZS	SKIP2	F-box protein SKIP2 [Brassica napus]
MSTRG.39076.1	MSTRG.39075	LFNR1	ferredoxin--NADP reductase, leaf isozyme 1, chloroplastic-like [Brassica napus]
MSTRG.39080.1	BnaA09G0101800ZS	DHQS	3-dehydroquinate synthase, chloroplastic [Brassica napus]
MSTRG.39102.1	BnaA09G0104000ZS	AGT1	LOW QUALITY PROTEIN: serine--glyoxylate aminotransferase-like [Brassica napus]
MSTRG.39112.1	MSTRG.39111	--	hypothetical protein BRARA_H00436 [Brassica rapa]
MSTRG.39115.1	MSTRG.39114	--	BnaC03g65670D [Brassica napus]
MSTRG.39265.1	BnaA09G0118900ZS	At5g57670	receptor-like cytosolic serine/threonine-protein kinase RBK2 isoform X2 [Brassica rapa]
MSTRG.39416.1	BnaA09G0132900ZS	--	O-glucosyltransferase rumi homolog [Brassica napus]
MSTRG.39518.1	BnaA09G0142600ZS	RPS6	30S ribosomal protein S6 alpha, chloroplastic [Brassica napus]
MSTRG.39565.1	MSTRG.39563	--	BnaCnng51150D [Brassica napus]
MSTRG.3961.1	BnaA01G0175800ZS	RMA2	E3 ubiquitin-protein ligase RMA2-like [Brassica napus]
MSTRG.39672.1	BnaA09G0155300ZS	FMOGS-OX2	flavin-containing monooxygenase FMO GS-OX2 [Brassica napus]
MSTRG.39674.1	BnaA09G0155600ZS	EARLI1	lipid transfer protein EARLI 1 [Brassica napus]
MSTRG.3971.1	BnaA01G0176400ZS	--	pyrroline-5-carboxylate reductase [Arabidopsis thaliana]
MSTRG.39750.1	BnaA09G0163300ZS	RECQL4B	ATP-dependent DNA helicase Q-like 4B [Brassica napus]
MSTRG.39832.1	MSTRG.39833	--	kunitz trypsin inhibitor 4-like [Brassica rapa]
MSTRG.39846.1	MSTRG.39844	Dnajb1	dnaJ homolog subfamily B member 1-like [Brassica napus]
MSTRG.40033.1	MSTRG.40032	HTR2	PREDICTED: LOW QUALITY PROTEIN: histone H3.2 [Tarenaya hassleriana]
MSTRG.40299.1	BnaA09G0213200ZS	ERF5	ethylene-responsive transcription factor 5 [Brassica napus]
MSTRG.40378.1	BnaA09G0220700ZS	IDD4	protein indeterminate-domain 4, chloroplastic-like [Brassica napus]
MSTRG.40441.1	BnaA09G0227000ZS	CYS5	cysteine proteinase inhibitor 5 [Brassica rapa]
MSTRG.40456.1	BnaA09G0228500ZS	--	BnaC09g21600D [Brassica napus]
MSTRG.40456.1	BnaA09G0228600ZS	PRPF4B	serine/threonine-protein kinase prp4-like isoform X2 [Brassica napus]
MSTRG.40636.1	BnaA09G0244700ZS	WRKY19	probable WRKY transcription factor 19 isoform X1 [Brassica napus]
MSTRG.40639.1	BnaA09G0244800ZS	DSC1	disease resistance protein RPS4 [Brassica napus]
MSTRG.41309.1	BnaA09G0317300ZS	--	meiosis-specific protein ASY2-like [Brassica napus]
MSTRG.4156.3	BnaA01G0194600ZS	COMT1	caffeic acid 3-O-methyltransferase [Brassica rapa]
MSTRG.41889.1	BnaA09G0382000ZS	--	leucine-rich repeat receptor-like serine/threonine-protein kinase BAM1 [Brassica rapa]
MSTRG.41902.1	BnaA09G0383000ZS	CLPX3	CLP protease regulatory subunit CLPX3, mitochondrial-like [Brassica napus]
MSTRG.41904.1	BnaA09G0383000ZS	CLPX3	CLP protease regulatory subunit CLPX3, mitochondrial-like [Brassica napus]
MSTRG.41906.1	BnaA09G0383200ZS	--	BnaC06g41740D [Brassica napus]
MSTRG.41908.1	BnaA09G0383500ZS	--	BnaC06g41740D [Brassica napus]
MSTRG.42145.1	BnaA09G0404100ZS	PUP4	probable purine permease 4 [Brassica rapa]
MSTRG.4223.1	BnaA01G0200300ZS	PAT1H2	BnaAnng10330D [Brassica napus]
MSTRG.42295.1	MSTRG.42294	--	protein ALP1-like isoform X1 [Brassica rapa]
MSTRG.42348.1	BnaA09G0423300ZS	ERF11	ethylene-responsive transcription factor 11 [Brassica napus]
MSTRG.42963.1	BnaA09G0477700ZS	--	L10-interacting MYB domain-containing protein [Brassica napus]
MSTRG.4335.1	MSTRG.4336	--	BnaC02g24820D [Brassica napus]
MSTRG.43557.1	BnaA09G0529700ZS	RFS2	probable galactinol--sucrose galactosyltransferase 2 [Brassica napus]
MSTRG.43579.1	BnaA09G0532000ZS	BHLH60	transcription factor bHLH60 [Brassica napus]
MSTRG.43707.1	BnaA09G0544300ZS	IQD14	protein IQ-DOMAIN 14 [Brassica napus]
MSTRG.4377.1	BnaA01G0216400ZS	PP2A10	protein PHLOEM PROTEIN 2-LIKE A10-like [Brassica napus]
MSTRG.43792.2	BnaA09G0551800ZS	PME36	probable pectinesterase/pectinesterase inhibitor 36 [Brassica rapa]
MSTRG.43881.1	BnaA09G0558600ZS	--	BnaA09g39380D [Brassica napus]
MSTRG.43909.1	BnaA09G0561000ZS	--	BnaA09g39550D [Brassica napus]
MSTRG.4415.1	MSTRG.4414	FRO4	PREDICTED: ferric reduction oxidase 4-like [Raphanus sativus]
MSTRG.44302.1	MSTRG.44301	RBG7	glycine-rich RNA-binding protein GRP1A isoform X1 [Brassica rapa]
MSTRG.44461.1	BnaA09G0612100ZS	ROH1	BnaC08g49480D [Brassica napus]
MSTRG.44461.2	BnaA09G0612100ZS	ROH1	BnaC08g49480D [Brassica napus]
MSTRG.44490.1	BnaA09G0613700ZS	Lip1	triacylglycerol lipase 2 isoform X1 [Eutrema salsugineum]
MSTRG.44515.1	BnaA09G0616100ZS	nvj2	BnaA09g44810D [Brassica napus]
MSTRG.4467.1	BnaA01G0225000ZS	CYP71A26	cytochrome P450 71A26-like [Brassica napus]
MSTRG.4467.2	BnaA01G0225000ZS	CYP71A26	cytochrome P450 71A26-like [Brassica napus]
MSTRG.44801.1	BnaA09G0643300ZS	GLE1	protein GLE1-like [Brassica napus]
MSTRG.44867.1	MSTRG.44866	At1g12200	flavin-containing monooxygenase FMO GS-OX-like 2 [Brassica napus]
MSTRG.44979.1	BnaA09G0659900ZS	SUC4	BnaA09g57200D [Brassica napus]
MSTRG.44984.2	BnaA09G0660400ZS	mipp1	multiple inositol polyphosphate phosphatase 1 [Brassica napus]
MSTRG.45655.1	BnaA10G0002000ZS	--	protein CELLULOSE SYNTHASE INTERACTIVE 3 [Brassica rapa]
MSTRG.4567.1	BnaA01G0236700ZS	KIN14F	kinesin-like protein KIN-14F [Brassica napus]
MSTRG.45685.1	BnaA10G0004800ZS	AN	BnaC05g00510D [Brassica napus]
MSTRG.45829.1	BnaA10G0020000ZS	--	plant/protein (DUF789) [Arabidopsis thaliana]
MSTRG.45851.1	BnaA10G0021600ZS	TZF4	zinc finger CCCH domain-containing protein 2 [Brassica rapa]
MSTRG.45867.1	BnaA10G0022500ZS	trc	serine/threonine-protein kinase tricorner [Brassica rapa]
MSTRG.45909.1	BnaA10G0025800ZS	CRY2	cryptochrome-1-like isoform X1 [Brassica napus]
MSTRG.45909.3	BnaA10G0025800ZS	CRY2	cryptochrome-1-like isoform X1 [Brassica napus]
MSTRG.46112.1	BnaA10G0045700ZS	RPD1	protein ROOT PRIMORDIUM DEFECTIVE 1 [Brassica rapa]
MSTRG.46171.1	BnaA10G0051300ZS	MAPKKK17	mitogen-activated protein kinase kinase kinase 18 [Brassica rapa]
MSTRG.46477.3	BnaA10G0084400ZS	UQCC1	ubiquinol-cytochrome-c reductase complex assembly factor 1-like [Brassica napus]
MSTRG.46501.1	MSTRG.46500	--	heat shock protein -related [Brassica oleracea]
MSTRG.46609.1	BnaA10G0097800ZS	PDV1	BnaA10g06660D [Brassica napus]
MSTRG.46621.1	BnaA10G0098500ZS	PME61	probable pectinesterase/pectinesterase inhibitor 61 [Brassica napus]
MSTRG.46717.1	BnaA10G0108600ZS	FH5	formin-like protein 5 [Brassica napus]
MSTRG.46895.1	MSTRG.46894	At4g10400	FBD-associated F-box protein At4g10400-like [Brassica napus]
MSTRG.47119.1	BnaA10G0142400ZS	At3g47300	selT-like protein [Brassica napus]
MSTRG.4712.1	MSTRG.4711	--	BnaC09g28180D [Brassica napus]
MSTRG.47121.5	BnaA10G0142400ZS	At3g47300	selT-like protein [Brassica napus]
MSTRG.47122.4	BnaA10G0142700ZS	PLC1	phosphoinositide phospholipase C 1-like [Brassica napus]
MSTRG.47122.5	BnaA10G0142700ZS	PLC1	phosphoinositide phospholipase C 1-like [Brassica napus]
MSTRG.47122.6	BnaA10G0142700ZS	PLC1	phosphoinositide phospholipase C 1-like [Brassica napus]
MSTRG.47140.1	BnaA10G0144800ZS	--	UPF0503 protein At3g09070, chloroplastic [Brassica napus]
MSTRG.47225.1	BnaA10G0152900ZS	UFC	protein UPSTREAM OF FLC-like [Brassica napus]
MSTRG.47227.1	BnaA10G0152900ZS	UFC	protein UPSTREAM OF FLC-like [Brassica napus]
MSTRG.47369.1	BnaA10G0165900ZS	OFP10	LOW QUALITY PROTEIN: transcription repressor OFP10 [Brassica napus]
MSTRG.47542.2	BnaA10G0180700ZS	ABCG23	ABC transporter G family member 23 [Brassica rapa]
MSTRG.47638.1	BnaA10G0189200ZS	--	BnaA10g16570D [Brassica napus]
MSTRG.47722.1	BnaA10G0196200ZS	TTC27	tetratricopeptide repeat protein 27 homolog [Brassica napus]
MSTRG.47756.1	BnaA10G0198800ZS	HSFA1B	heat stress transcription factor A-1b-like isoform X4 [Brassica napus]
MSTRG.47812.1	BnaA10G0202900ZS	--	50S ribosomal protein-like protein [Arabidopsis thaliana]
MSTRG.47840.1	BnaA10G0206000ZS	ARB_01444	probable endo-1,3(4)-beta-glucanase ARB_01444 [Brassica rapa]
MSTRG.47890.1	BnaA10G0209700ZS	MYB16	transcription factor MYB16-like isoform X2 [Brassica napus]
MSTRG.47938.1	BnaA10G0214400ZS	BC10	glycosyltransferase BC10 [Brassica rapa]
MSTRG.48058.1	BnaA10G0225800ZS	FTIP3	BnaAnng26150D [Brassica napus]
MSTRG.48059.1	BnaA10G0225800ZS	FTIP3	BnaAnng26150D [Brassica napus]
MSTRG.48114.1	BnaA10G0231100ZS	HSP17.6	17.6 kDa class II heat shock protein [Brassica rapa]
MSTRG.48275.1	BnaA10G0244800ZS	FLC	MADS-box protein FLOWERING LOCUS C isoform X1 [Brassica napus]
MSTRG.48277.1	BnaA10G0244900ZS	DFC	80A08_10 [Brassica rapa subsp. pekinensis] [Brassica rapa]
MSTRG.48496.1	BnaA10G0264400ZS	At5g06940	probably inactive leucine-rich repeat receptor-like protein kinase At5g06940 [Brassica napus]
MSTRG.48502.1	BnaA10G0264600ZS	TGA10	transcription factor TGA10 isoform X4 [Brassica napus]
MSTRG.48637.1	BnaA10G0276100ZS	ATL73	RING-H2 finger protein ATL73 [Brassica napus]
MSTRG.48667.1	BnaA10G0278500ZS	SUN1	protein SAD1/UNC-84 domain protein 1 [Brassica napus]
MSTRG.48702.1	BnaA10G0281200ZS	RPS17D	40S ribosomal protein S17-4 [Brassica rapa]
MSTRG.48710.1	BnaA10G0282200ZS	SIR	assimilatory sulfite reductase (ferredoxin), chloroplastic [Brassica napus]
MSTRG.48744.2	BnaA10G0284600ZS	ZAT6	zinc finger protein ZAT6 [Brassica rapa]
MSTRG.48773.1	BnaA10G0287200ZS	NSFBx	BnaCnng10450D [Brassica napus]
MSTRG.48968.1	BnaC01G0001600ZS	At4g38730	BnaCnng52400D [Brassica napus]
MSTRG.48978.1	BnaC01G0002500ZS	KIN7F	PREDICTED: kinesin-like protein NACK1 [Brassica oleracea var. oleracea] [Brassica oleracea]
MSTRG.49373.1	BnaC01G0038100ZS	At5g57670	receptor-like cytosolic serine/threonine-protein kinase RBK2 isoform X2 [Brassica rapa]
MSTRG.49416.1	BnaC01G0041600ZS	SH3P2	SH3 domain-containing protein 2-like [Brassica napus]
MSTRG.49538.1	BnaC01G0052400ZS	At4g33300	probable disease resistance protein At4g33300 [Brassica napus]
MSTRG.49959.1	MSTRG.49958	At4g29550	PREDICTED: UPF0725 protein At4g29550 [Brassica oleracea var. oleracea] [Brassica oleracea]
MSTRG.50110.1	BnaC01G0105400ZS	At4g17550	BnaC01g10160D [Brassica napus]
MSTRG.50420.1	BnaC01G0135200ZS	TUBB9	tubulin beta-9 chain [Brassica rapa]
MSTRG.50451.1	BnaC01G0137800ZS	PCMP-H28	PREDICTED: pentatricopeptide repeat-containing protein At4g21065 [Brassica oleracea var. oleracea] [Brassica oleracea]
MSTRG.51018.1	BnaC01G0191900ZS	--	PREDICTED: neurofilament medium polypeptide-like [Brassica oleracea var. oleracea] [Brassica oleracea]
MSTRG.51182.6	BnaC01G0211600ZS	NAP1	PREDICTED: napin [Brassica oleracea var. oleracea] [Brassica oleracea]
MSTRG.51182.6	BnaC01G0211700ZS	NAP1	napin-like [Brassica napus]
MSTRG.51182.6	BnaC01G0211800ZS	NAP1	PREDICTED: napin-like [Brassica oleracea var. oleracea] [Brassica oleracea]
MSTRG.51182.7	BnaC01G0211800ZS	NAP1	PREDICTED: napin-like [Brassica oleracea var. oleracea] [Brassica oleracea]
MSTRG.51489.1	BnaC01G0236700ZS	NAPB	napin-2 [Brassica napus]
MSTRG.51513.1	BnaC01G0238800ZS	NAR1	protein NAR1-like isoform X1 [Brassica napus]
MSTRG.51611.1	BnaC01G0247600ZS	P85	senescence/dehydration-associated protein At4g35985, chloroplastic [Brassica napus]
MSTRG.51634.1	BnaC01G0250700ZS	TPRP-F1	extensin-like [Brassica napus]
MSTRG.51634.2	BnaC01G0250700ZS	TPRP-F1	extensin-like [Brassica napus]
MSTRG.51634.3	BnaC01G0250700ZS	TPRP-F1	extensin-like [Brassica napus]
MSTRG.51861.1	BnaC01G0272400ZS	RPL26A	60S ribosomal protein L26-1 [Brassica rapa]
MSTRG.51872.1	BnaC01G0273400ZS	PP2A10	protein PHLOEM PROTEIN 2-LIKE A10 [Brassica napus]
MSTRG.5192.1	BnaA01G0302600ZS	RPL27C	60S ribosomal protein L27-3 [Brassica rapa]
MSTRG.5202.1	MSTRG.5201	RE2	disease resistance protein [Brassica rapa subsp. pekinensis] [Brassica rapa]
MSTRG.5203.1	MSTRG.5204	RE2	disease resistance protein [Brassica rapa subsp. pekinensis] [Brassica rapa]
MSTRG.52478.1	MSTRG.52480	--	hypothetical protein DY000_02039765 [Brassica cretica]
MSTRG.52675.1	BnaC01G0353300ZS	GAE6	PREDICTED: UDP-glucuronate 4-epimerase 6-like [Brassica oleracea var. oleracea] [Brassica oleracea]
MSTRG.52734.1	BnaC01G0358400ZS	PHO1	PREDICTED: phosphate transporter PHO1 [Brassica oleracea var. oleracea] [Brassica oleracea]
MSTRG.52739.1	BnaC01G0358900ZS	rpl14	rpl14 gene product [Brassica napus]
MSTRG.52739.1	BnaC01G0359000ZS	rpl16	BnaA01g34130D [Brassica napus]
MSTRG.52767.1	BnaC01G0361600ZS	XBAT35	BnaC01g30990D [Brassica napus]
MSTRG.52851.1	BnaC01G0370700ZS	--	hypothetical protein DY000_02041938 [Brassica cretica]
MSTRG.52931.1	BnaC01G0378600ZS	UGT84A2	PREDICTED: UDP-glycosyltransferase 84A2-like [Brassica oleracea var. oleracea] [Brassica oleracea]
MSTRG.53023.1	BnaC01G0387200ZS	BHLH123	PREDICTED: transcription factor bHLH123-like isoform X1 [Brassica oleracea var. oleracea] [Brassica oleracea]
MSTRG.5311.1	BnaA01G0312700ZS	--	BnaA01g25590D [Brassica napus]
MSTRG.53189.1	BnaC01G0405900ZS	BTS	zinc finger protein BRUTUS [Brassica napus]
MSTRG.53225.1	BnaC01G0409800ZS	RLK902	probable inactive receptor kinase RLK902 [Brassica napus]
MSTRG.5335.1	BnaA01G0316400ZS	CHR27	helicase-like transcription factor CHR27 [Brassica rapa]
MSTRG.53417.1	BnaC01G0431000ZS	CYP37	BnaCnng30330D [Brassica napus]
MSTRG.53623.6	BnaC01G0448800ZS	MYB5	transcription repressor MYB5-like [Brassica napus]
MSTRG.53698.1	BnaC01G0456100ZS	NANA	aspartyl protease family protein 2 [Brassica napus]
MSTRG.53723.1	BnaC01G0458700ZS	DRAP1	dr1-associated corepressor-like [Brassica napus]
MSTRG.5375.1	MSTRG.5374	--	BnaA01g27700D [Brassica napus]
MSTRG.53987.1	MSTRG.53986	RPL35A	BnaAnng13110D [Brassica napus]
MSTRG.5399.1	BnaA01G0321600ZS	ABF4	ABSCISIC ACID-INSENSITIVE 5-like protein 7 isoform X1 [Brassica napus]
MSTRG.54040.1	BnaC01G0488400ZS	--	huntingtin-interacting protein K [Brassica rapa]
MSTRG.54116.1	BnaC01G0496600ZS	RP2	pyruvate, phosphate dikinase regulatory protein 2-like [Brassica napus]
MSTRG.54171.1	BnaC01G0500700ZS	PMI1	mannose-6-phosphate isomerase 1-like [Brassica napus]
MSTRG.54187.1	BnaC01G0501900ZS	Ctnnbl1	beta-catenin-like protein 1 [Brassica napus]
MSTRG.54245.1	MSTRG.54244	--	BnaCnng18440D [Brassica napus]
MSTRG.54245.2	MSTRG.54244	--	BnaCnng18440D [Brassica napus]
MSTRG.54348.1	BnaC01G0513600ZS	RPS3A	BnaC01g39890D [Brassica napus]
MSTRG.54408.1	BnaC02G0005000ZS	MT2A	metallothionein-like protein type 2, MT2-4/MT2-25 [Brassica rapa]
MSTRG.54428.2	BnaC02G0007600ZS	IQD1	protein IQ-DOMAIN 1-like [Brassica napus]
MSTRG.54484.1	BnaC02G0014000ZS	MLS	BnaC02g02870D [Brassica napus]
MSTRG.54486.1	BnaC02G0014200ZS	At5g03900	BnaC02g02850D [Brassica napus]
MSTRG.54542.1	BnaC02G0019600ZS	--	ribosomal RNA-processing protein 14-like [Brassica napus]
MSTRG.54625.1	MSTRG.54624	--	BnaC02g01360D [Brassica napus]
MSTRG.54644.1	BnaC02G0031900ZS	EAPP	PREDICTED: E2F-associated phosphoprotein [Brassica oleracea var. oleracea] [Brassica oleracea]
MSTRG.54647.1	BnaC02G0032100ZS	AGAL2	alpha-galactosidase 2-like [Brassica napus]
MSTRG.54656.1	BnaC02G0032600ZS	At5g08430	BnaC02g01100D [Brassica napus]
MSTRG.54690.1	BnaC02G0036000ZS	MDH1	malate dehydrogenase 1, glyoxysomal [Brassica napus]
MSTRG.54761.1	BnaC02G0042500ZS	PL1	protein POLAR LOCALIZATION DURING ASYMMETRIC DIVISION AND REDISTRIBUTION-like [Brassica napus]
MSTRG.54768.1	BnaC02G0043300ZS	--	BnaCnng20100D [Brassica napus]
MSTRG.54800.1	BnaC02G0047700ZS	--	thioredoxin-related transmembrane protein 2 homolog [Brassica napus]
MSTRG.54807.1	BnaC02G0048200ZS	--	BnaA02g34980D [Brassica napus]
MSTRG.54822.1	BnaC02G0049800ZS	HSP17.6	17.6 kDa class II heat shock protein [Brassica napus]
MSTRG.54871.1	BnaC02G0055200ZS	NPF6.1	PREDICTED: protein NRT1/ PTR FAMILY 6.1 [Brassica oleracea var. oleracea] [Brassica oleracea]
MSTRG.54890.1	BnaC02G0057400ZS	At5g13670	WAT1-related protein At5g13670-like [Brassica napus]
MSTRG.54892.1	BnaC02G0057500ZS	--	unnamed protein product [Brassica oleracea]
MSTRG.54908.1	BnaC02G0058900ZS	ELCL	protein ELC-like, partial [Brassica napus]
MSTRG.54957.1	BnaC02G0065000ZS	FDH1	formate dehydrogenase, chloroplastic/mitochondrial [Brassica napus]
MSTRG.54967.1	BnaC02G0065800ZS	NPF5.8	protein NRT1/ PTR FAMILY 5.8 [Brassica napus]
MSTRG.55003.1	BnaC02G0069100ZS	TPX2	PREDICTED: protein WVD2-like 4 isoform X2 [Raphanus sativus]
MSTRG.55050.1	BnaC02G0074200ZS	SEI1	seipin-1-like [Brassica napus]
MSTRG.55054.1	BnaC02G0074500ZS	RIC4	PREDICTED: CRIB domain-containing protein RIC4-like [Brassica oleracea var. oleracea] [Brassica oleracea]
MSTRG.55119.1	MSTRG.55118	At5g15660	BnaUnng01600D [Brassica napus]
MSTRG.55179.1	BnaC02G0087600ZS	DREB2G	PREDICTED: dehydration-responsive element-binding protein 2G-like [Brassica oleracea var. oleracea] [Brassica oleracea]
MSTRG.55224.1	BnaC02G0093200ZS	--	PREDICTED: caffeoylshikimate esterase [Brassica oleracea var. oleracea] [Brassica oleracea]
MSTRG.55238.1	BnaC02G0094200ZS	CLT1	PREDICTED: protein CLT1, chloroplastic [Brassica oleracea var. oleracea] [Brassica oleracea]
MSTRG.55370.1	BnaC02G0107200ZS	--	hybrid signal transduction histidine kinase M-like protein [Arabidopsis thaliana]
MSTRG.55420.1	BnaC02G0112700ZS	HDT2	PREDICTED: histone deacetylase HDT3-like [Brassica oleracea var. oleracea] [Brassica oleracea]
MSTRG.55630.1	BnaC02G0136500ZS	At5g58300	probable inactive receptor kinase At5g58300 [Brassica napus]
MSTRG.55667.1	BnaC02G0139700ZS	--	BnaA02g08010D [Brassica napus]
MSTRG.5580.1	BnaA01G0337800ZS	At3g17050	glycine-rich cell wall structural protein [Brassica rapa]
MSTRG.56340.1	BnaC02G0203600ZS	PUB20	U-box domain-containing protein 20 [Brassica napus]
MSTRG.56469.1	BnaC02G0217200ZS	SUFE2	sufE-like protein 2, chloroplastic [Brassica napus]
MSTRG.56798.1	BnaC02G0250500ZS	--	hypothetical protein F2Q69_00011861 [Brassica cretica]
MSTRG.56868.1	BnaC02G0257100ZS	At1g71170	PREDICTED: probable 3-hydroxyisobutyrate dehydrogenase-like 2, mitochondrial [Brassica oleracea var. oleracea] [Brassica oleracea]
MSTRG.5690.1	BnaA01G0348000ZS	CYP37	BnaCnng30330D [Brassica napus]
MSTRG.57019.1	BnaC02G0271200ZS	PYL3	abscisic acid receptor PYL3-like [Brassica napus]
MSTRG.57051.1	BnaC02G0274700ZS	2022-10-01	PREDICTED: organic cation/carnitine transporter 1-like [Brassica oleracea var. oleracea] [Brassica oleracea]
MSTRG.5774.1	BnaA01G0354800ZS	dnaJ	dnaJ homolog subfamily B member 8-like [Brassica napus]
MSTRG.57852.1	MSTRG.57851	--	general transcriptional corepressor trfA-like [Brassica napus]
MSTRG.57956.1	MSTRG.57955	--	BnaC02g20710D [Brassica napus]
MSTRG.57980.1	BnaC02G0369900ZS	--	transmembrane protein [Arabidopsis thaliana]
MSTRG.58128.1	BnaC02G0379200ZS	CYP74A	allene oxide synthase, chloroplastic-like [Brassica napus]
MSTRG.5817.1	BnaA01G0364900ZS	PGK1	phosphoglycerate kinase 1, chloroplastic [Brassica napus]
MSTRG.58301.1	BnaC02G0400700ZS	RPA1C	replication protein A 70 kDa DNA-binding subunit C-like [Brassica napus]
MSTRG.58402.1	MSTRG.58404	--	3-hydroxybutyryl-CoA dehydrogenase [Brassica rapa]
MSTRG.58556.1	BnaC02G0423700ZS	RTNLB15	reticulon-like protein B15 [Brassica napus]
MSTRG.58721.1	BnaC02G0438700ZS	--	BnaCnng39430D [Brassica napus]
MSTRG.58721.2	BnaC02G0438700ZS	--	BnaCnng39430D [Brassica napus]
MSTRG.59046.1	BnaC02G0474000ZS	pKIWI502	fruit protein pKIWI502 [Brassica napus]
MSTRG.59193.1	BnaC02G0488000ZS	CYP75B137	PREDICTED: cytochrome P450 93A3-like [Brassica oleracea var. oleracea] [Brassica oleracea]
MSTRG.5934.1	BnaA01G0369100ZS	--	BnaA01g30620D [Brassica napus]
MSTRG.59452.1	BnaC02G0510800ZS	--	BnaC05g03390D, partial [Brassica napus]
MSTRG.59631.1	BnaC02G0531800ZS	PMEI11	pectinesterase inhibitor 11-like [Brassica napus]
MSTRG.59737.1	BnaC02G0541900ZS	EXL2	PREDICTED: protein EXORDIUM-like 2 [Brassica oleracea var. oleracea] [Brassica oleracea]
MSTRG.59757.1	BnaC02G0544000ZS	BXL4	beta-D-xylosidase 4-like [Brassica napus]
MSTRG.59765.1	BnaC02G0544600ZS	ABR1	ethylene-responsive transcription factor ABR1-like [Brassica napus]
MSTRG.59780.2	BnaC02G0546100ZS	AGL27	agamous-like MADS-box protein AGL27 [Brassica napus]
MSTRG.59780.3	BnaC02G0546100ZS	AGL27	agamous-like MADS-box protein AGL27 [Brassica napus]
MSTRG.59860.1	BnaC02G0552800ZS	SR1IP1	BTB/POZ domain-containing protein SR1IP1 [Brassica rapa]
MSTRG.59864.1	MSTRG.59865	SBT1.7	PREDICTED: subtilisin-like protease SBT1.7 [Brassica oleracea var. oleracea] [Brassica oleracea]
MSTRG.59947.1	BnaC03G0003200ZS	FBL3	PREDICTED: F-box/LRR-repeat protein 3 [Brassica oleracea var. oleracea] [Brassica oleracea]
MSTRG.59959.1	BnaC03G0004000ZS	TBL35	protein trichome birefringence-like 35 [Brassica napus]
MSTRG.60002.1	MSTRG.60001	--	BnaCnng47640D [Brassica napus]
MSTRG.60010.1	BnaC03G0009500ZS	KIN10B	PREDICTED: kinesin-like protein KIF22 [Brassica oleracea var. oleracea] [Brassica oleracea]
MSTRG.60048.1	BnaC03G0013300ZS	--	E3 ubiquitin-protein ligase [Arabidopsis thaliana]
MSTRG.60133.1	BnaC03G0022100ZS	SUVH1	histone-lysine N-methyltransferase, H3 lysine-9 specific SUVH1-like [Brassica napus]
MSTRG.60199.1	BnaC03G0028400ZS	RPS17D	40S ribosomal protein S17-4 [Brassica napus]
MSTRG.60228.1	BnaC03G0031100ZS	SRF2	BnaUnng02270D [Brassica napus]
MSTRG.60231.1	BnaC03G0031300ZS	TGA10	transcription factor TGA10-like isoform X2 [Brassica napus]
MSTRG.60231.2	BnaC03G0031300ZS	TGA10	transcription factor TGA10-like isoform X2 [Brassica napus]
MSTRG.60256.1	BnaC03G0033600ZS	TSN1	PREDICTED: staphylococcal nuclease domain-containing protein 1-like [Brassica oleracea var. oleracea] [Brassica oleracea]
MSTRG.60296.1	BnaC03G0036600ZS	DGK1	diacylglycerol kinase 1-like [Brassica napus]
MSTRG.60397.1	BnaC03G0045900ZS	TTL1	inactive TPR repeat-containing thioredoxin TTL3-like [Brassica napus]
MSTRG.60405.1	BnaC03G0046300ZS	FLC	FLC3 [Brassica rapa subsp. chinensis] [Brassica rapa]
MSTRG.60489.1	BnaC03G0053000ZS	--	BnaA02g34980D [Brassica napus]
MSTRG.60871.1	BnaC03G0087500ZS	NAP1	PREDICTED: napin embryo-specific [Brassica oleracea var. oleracea] [Brassica oleracea]
MSTRG.60901.1	BnaC03G0090700ZS	BAM9	PREDICTED: inactive beta-amylase 9 isoform X1 [Brassica oleracea var. oleracea] [Brassica oleracea]
MSTRG.61149.1	BnaC03G0115400ZS	HSP18.1	18.1 kDa class I heat shock protein [Brassica napus]
MSTRG.61163.1	BnaC03G0116500ZS	UGT76E2	UDP-glycosyltransferase 76E2-like [Brassica napus]
MSTRG.61395.1	BnaC03G0139200ZS	--	Import inner membrane translocase subunit TIM50-A [Hibiscus syriacus]
MSTRG.61413.1	BnaC03G0140600ZS	At5g38830	BnaC03g14210D [Brassica napus]
MSTRG.61419.1	BnaC03G0141100ZS	AT2	PREDICTED: probable long-chain-alcohol O-fatty-acyltransferase 2 [Brassica oleracea var. oleracea] [Brassica oleracea]
MSTRG.61419.2	BnaC03G0141100ZS	AT2	PREDICTED: probable long-chain-alcohol O-fatty-acyltransferase 2 [Brassica oleracea var. oleracea] [Brassica oleracea]
MSTRG.61566.1	BnaC03G0156800ZS	At4g11590	BnaC03g15520D [Brassica napus]
MSTRG.61710.1	BnaC03G0168200ZS	POT1	PREDICTED: potassium transporter 1 [Brassica oleracea var. oleracea] [Brassica oleracea]
MSTRG.6181.1	MSTRG.6180	--	hypothetical protein F2Q69_00039127 [Brassica cretica]
MSTRG.61842.1	BnaC03G0181800ZS	MYB101	PREDICTED: transcription factor GAMYB-like [Brassica oleracea var. oleracea] [Brassica oleracea]
MSTRG.61842.2	BnaC03G0181800ZS	MYB101	PREDICTED: transcription factor GAMYB-like [Brassica oleracea var. oleracea] [Brassica oleracea]
MSTRG.61851.1	BnaC03G0182700ZS	GRP23	glycine-rich protein 23 [Brassica napus]
MSTRG.61851.2	BnaC03G0182700ZS	GRP23	glycine-rich protein 23 [Brassica napus]
MSTRG.62119.1	BnaC03G0210500ZS	AGD7	ADP-ribosylation factor GTPase-activating protein AGD7-like [Brassica napus]
MSTRG.62121.1	BnaC03G0210500ZS	AGD7	ADP-ribosylation factor GTPase-activating protein AGD7-like [Brassica napus]
MSTRG.62216.1	BnaC03G0218800ZS	At2g38640	PREDICTED: protein LURP-one-related 8-like isoform X1 [Brassica oleracea var. oleracea] [Brassica oleracea]
MSTRG.62554.1	MSTRG.62553	--	extensin-2-like [Brassica napus]
MSTRG.62554.2	MSTRG.62553	--	extensin-2-like [Brassica napus]
MSTRG.62554.3	MSTRG.62553	--	extensin-2-like [Brassica napus]
MSTRG.62561.1	BnaC03G0248000ZS	At2g43240	CMP-sialic acid transporter 2 [Brassica napus]
MSTRG.62561.2	BnaC03G0248000ZS	At2g43240	CMP-sialic acid transporter 2 [Brassica napus]
MSTRG.62657.1	BnaC03G0256300ZS	CKB4	casein kinase II beta subunit 4 [Arabidopsis thaliana]
MSTRG.6295.1	MSTRG.6294	At3g03980	NADPH-dependent aldehyde reductase-like protein, chloroplastic [Brassica napus]
MSTRG.62968.1	BnaC03G0287200ZS	AHL17	PREDICTED: AT-hook motif nuclear-localized protein 17 [Brassica oleracea var. oleracea] [Brassica oleracea]
MSTRG.63075.1	BnaC03G0295200ZS	EXO	PREDICTED: protein EXORDIUM [Brassica oleracea var. oleracea] [Brassica oleracea]
MSTRG.63112.1	MSTRG.63113	RXLR161	copia-like retrotransposable element [Arabidopsis thaliana]
MSTRG.63144.1	BnaC03G0300600ZS	--	protein ABHD11-like [Brassica napus]
MSTRG.63150.1	BnaC03G0301100ZS	HSP22.0	22.0 kDa heat shock protein [Brassica napus]
MSTRG.63228.1	MSTRG.63229	GIP	PREDICTED: LOW QUALITY PROTEIN: copia protein [Brassica oleracea var. oleracea] [Brassica oleracea]
MSTRG.6336.1	MSTRG.6335	--	BnaCnng18440D [Brassica napus]
MSTRG.6337.1	MSTRG.6335	--	BnaCnng18440D [Brassica napus]
MSTRG.63471.2	BnaC03G0332400ZS	NHL1	PREDICTED: protein YLS9-like [Brassica oleracea var. oleracea] [Brassica oleracea]
MSTRG.6375.1	BnaA01G0413300ZS	Ctnnbl1	beta-catenin-like protein 1 [Brassica napus]
MSTRG.63888.1	BnaC03G0374900ZS	--	BnaAnng16530D [Brassica napus]
MSTRG.6396.1	BnaA01G0415300ZS	SAMDC3	S-adenosylmethionine decarboxylase proenzyme 3 [Brassica rapa]
MSTRG.64003.1	BnaC03G0386100ZS	ATL66	PREDICTED: RING-H2 finger protein ATL66-like [Brassica oleracea var. oleracea] [Brassica oleracea]
MSTRG.64330.1	BnaC03G0413000ZS	--	plant/protein [Arabidopsis thaliana]
MSTRG.64513.1	BnaC03G0431100ZS	--	hypothetical protein F2Q69_00031419 [Brassica cretica]
MSTRG.64597.1	BnaC03G0439800ZS	--	At3g19920 [Arabidopsis thaliana]
MSTRG.64702.1	BnaC03G0449400ZS	--	BnaC03g42180D [Brassica napus]
MSTRG.64717.1	BnaC03G0450800ZS	UGT71B2	PREDICTED: UDP-glycosyltransferase 71B2-like [Brassica oleracea var. oleracea] [Brassica oleracea]
MSTRG.64734.1	BnaC03G0452300ZS	TPRP-F1	PREDICTED: 36.4 kDa proline-rich protein-like [Brassica oleracea var. oleracea] [Brassica oleracea]
MSTRG.64734.2	BnaC03G0452300ZS	TPRP-F1	PREDICTED: 36.4 kDa proline-rich protein-like [Brassica oleracea var. oleracea] [Brassica oleracea]
MSTRG.64783.1	BnaC03G0456800ZS	TSO1	CRC domain-containing protein TSO1-like isoform X1 [Brassica napus]
MSTRG.6486.1	BnaA01G0425400ZS	matK	matK gene product [Brassica napus]
MSTRG.65009.1	BnaC03G0477200ZS	FLA7	PREDICTED: fasciclin-like arabinogalactan protein 7 [Brassica oleracea var. oleracea] [Brassica oleracea]
MSTRG.65068.1	BnaC03G0482300ZS	MOD1	BnaC03g45040D [Brassica napus]
MSTRG.65079.1	BnaC03G0483400ZS	SCPL42	PREDICTED: serine carboxypeptidase-like 42 [Brassica oleracea var. oleracea] [Brassica oleracea]
MSTRG.65079.2	BnaC03G0483400ZS	SCPL42	PREDICTED: serine carboxypeptidase-like 42 [Brassica oleracea var. oleracea] [Brassica oleracea]
MSTRG.65399.1	BnaC03G0514300ZS	Sirup	succinate dehydrogenase assembly factor 4, mitochondrial [Brassica napus]
MSTRG.65734.1	BnaC03G0541700ZS	GAMMACAL1	gamma carbonic anhydrase-like 1, mitochondrial [Brassica napus]
MSTRG.6607.1	BnaA02G0008400ZS	--	BnaCnng28770D [Brassica napus]
MSTRG.66411.1	BnaC03G0602800ZS	NRT2.6	high affinity nitrate transporter 2.6-like [Brassica napus]
MSTRG.66848.1	BnaC03G0646800ZS	PUB45	BnaC03g58180D [Brassica napus]
MSTRG.66868.1	BnaC03G0648900ZS	NAC005	BnaC03g58370D [Brassica napus]
MSTRG.66879.1	BnaC03G0650200ZS	SMG7L	protein SMG7L-like [Brassica napus]
MSTRG.6688.1	BnaA02G0016700ZS	--	type-1 restriction enzyme mjaxp r protein (DUF668) [Arabidopsis thaliana]
MSTRG.66890.1	BnaC03G0651000ZS	ERF11	ethylene-responsive transcription factor 11-like [Brassica napus]
MSTRG.66909.1	BnaC03G0653200ZS	--	BnaC03g58750D [Brassica napus]
MSTRG.67515.1	BnaC03G0724800ZS	--	late embryogenesis abundant protein 1-like [Brassica napus]
MSTRG.67665.1	BnaC03G0742000ZS	plcA	PI-PLC X-box domain-containing protein DDB_G0293730-like [Brassica napus]
MSTRG.68007.1	BnaC03G0773400ZS	ATL14	RING-H2 finger protein ATL14-like [Brassica napus]
MSTRG.68039.4	BnaC03G0777200ZS	PUB56	PREDICTED: U-box domain-containing protein 56-like [Brassica oleracea var. oleracea] [Brassica oleracea]
MSTRG.68039.5	BnaC03G0777200ZS	PUB56	PREDICTED: U-box domain-containing protein 56-like [Brassica oleracea var. oleracea] [Brassica oleracea]
MSTRG.68041.1	BnaC03G0777300ZS	VIP3	WD repeat-containing protein VIP3-like [Brassica napus]
MSTRG.6805.1	BnaA02G0027700ZS	--	furry [Arabidopsis thaliana]
MSTRG.68254.1	BnaC03G0799300ZS	TTL1	PREDICTED: TPR repeat-containing thioredoxin TTL1 [Brassica oleracea var. oleracea] [Brassica oleracea]
MSTRG.6830.1	BnaA02G0029600ZS	At5g08430	BnaAnng06060D [Brassica napus]
MSTRG.68419.1	BnaC03G0814600ZS	At1g55760	PREDICTED: BTB/POZ domain-containing protein At1g55760 [Brassica oleracea var. oleracea] [Brassica oleracea]
MSTRG.68419.2	BnaC03G0814600ZS	At1g55760	PREDICTED: BTB/POZ domain-containing protein At1g55760 [Brassica oleracea var. oleracea] [Brassica oleracea]
MSTRG.6848.1	BnaA02G0030900ZS	SRT2	NAD-dependent protein deacylase SRT2-like [Brassica napus]
MSTRG.68548.1	BnaC04G0009200ZS	SAMS2	S-adenosylmethionine synthase 2 [Brassica napus]
MSTRG.68576.1	BnaC04G0012300ZS	GULLO2	BnaC04g00690D [Brassica napus]
MSTRG.68612.1	BnaC04G0014700ZS	ATL21B	BnaC04g52110D [Brassica napus]
MSTRG.68622.1	BnaC04G0015800ZS	XLG2	protein ENHANCED DISEASE RESISTANCE 4-like [Brassica napus]
MSTRG.68649.1	BnaC04G0018000ZS	SLD2	delta(8)-fatty-acid desaturase 2-like [Brassica napus]
MSTRG.68725.2	BnaC04G0026400ZS	ATS3A	BnaC04g01900D [Brassica napus]
MSTRG.69004.1	BnaC04G0052900ZS	SYNCRIP	nucleolin-like isoform X1 [Brassica napus]
MSTRG.69049.1	BnaC04G0056600ZS	PME17	probable pectinesterase/pectinesterase inhibitor 17 [Brassica napus]
MSTRG.69049.1	BnaC04G0056800ZS	PME17	probable pectinesterase/pectinesterase inhibitor 17 [Brassica napus]
MSTRG.69388.1	BnaC04G0089800ZS	EXPA3	expansin-A3 precursor [Brassica rapa]
MSTRG.69682.3	BnaC04G0119100ZS	EIX2	LRR receptor-like serine/threonine-protein kinase FLS2 isoform X1 [Brassica napus]
MSTRG.6987.1	BnaA02G0041800ZS	--	BnaA02g34980D [Brassica napus]
MSTRG.6987.1	BnaA02G0041900ZS	At4g17560	50S ribosomal protein L19-1, chloroplastic-like [Brassica napus]
MSTRG.69943.2	BnaC04G0143700ZS	GT12	PREDICTED: xyloglucan galactosyltransferase KATAMARI1 homolog [Brassica oleracea var. oleracea] [Brassica oleracea]
MSTRG.70224.1	MSTRG.70223	pol	protein NYNRIN-like [Brassica napus]
MSTRG.71102.1	BnaC04G0256800ZS	CSP41A	chloroplast stem-loop binding protein of 41 kDa a, chloroplastic [Brassica napus]
MSTRG.71189.1	BnaC04G0265800ZS	ARF18	PREDICTED: auxin response factor 18-like [Brassica oleracea var. oleracea] [Brassica oleracea]
MSTRG.71205.1	BnaC04G0267100ZS	SLD1	delta8-sphingolipid desaturase [Brassica rapa]
MSTRG.71218.1	BnaC04G0269100ZS	PIP1-1	PREDICTED: aquaporin PIP1-1-like isoform X1 [Raphanus sativus]
MSTRG.71218.2	BnaC04G0269100ZS	PIP1-1	PREDICTED: aquaporin PIP1-1-like isoform X1 [Raphanus sativus]
MSTRG.7129.1	BnaA02G0054100ZS	--	WW domain-binding protein 11 isoform X2 [Brassica rapa]
MSTRG.71321.1	BnaC04G0279700ZS	--	biorientation of chromosomes in cell division protein 1-like 1, partial [Brassica napus]
MSTRG.71340.1	BnaC04G0282300ZS	NTF4	mitogen-activated protein kinase homolog NTF4-like [Brassica napus]
MSTRG.71340.3	BnaC04G0282300ZS	NTF4	mitogen-activated protein kinase homolog NTF4-like [Brassica napus]
MSTRG.7142.1	BnaA02G0055500ZS	FDH1	formate dehydrogenase, chloroplastic/mitochondrial [Brassica rapa]
MSTRG.71870.1	BnaC04G0334600ZS	PAL2	BnaCnng52250D [Brassica napus]
MSTRG.71870.1	BnaC04G0334700ZS	PAL2	PREDICTED: phenylalanine ammonia-lyase 2-like [Brassica oleracea var. oleracea] [Brassica oleracea]
MSTRG.72129.1	BnaC04G0358300ZS	HMGB10	BnaC04g29240D [Brassica napus]
MSTRG.72280.1	MSTRG.72281	GSTT3	glutathione S-transferase T3-like isoform X1 [Brassica napus]
MSTRG.72280.1	MSTRG.72282	--	protein ALP1-like isoform X1 [Brassica rapa]
MSTRG.7241.1	BnaA02G0064800ZS	--	voltage-dependent L-type calcium channel subunit [Arabidopsis thaliana]
MSTRG.72539.1	BnaC04G0399900ZS	SCRM	transcription factor ICE1-like, partial [Brassica napus]
MSTRG.72592.1	BnaC04G0406900ZS	At3g27390	PREDICTED: uncharacterized membrane protein At3g27390 [Brassica oleracea var. oleracea] [Brassica oleracea]
MSTRG.72592.2	BnaC04G0406900ZS	At3g27390	PREDICTED: uncharacterized membrane protein At3g27390 [Brassica oleracea var. oleracea] [Brassica oleracea]
MSTRG.72994.1	MSTRG.72993	MES19	BnaA04g13720D [Brassica napus]
MSTRG.72994.2	MSTRG.72993	MES19	BnaA04g13720D [Brassica napus]
MSTRG.73119.1	BnaC04G0458700ZS	At2g24580	BnaC04g36290D [Brassica napus]
MSTRG.73205.1	BnaC04G0466000ZS	EBF1	LOW QUALITY PROTEIN: EIN3-binding F-box protein 1-like [Brassica napus]
MSTRG.73298.1	BnaC04G0473700ZS	NHL13	BnaA04g15600D [Brassica napus]
MSTRG.73326.1	BnaC04G0477200ZS	At2g27310	F-box protein At2g27310 [Brassica napus]
MSTRG.7354.1	BnaA02G0074300ZS	At1g67520	G-type lectin S-receptor-like serine/threonine-protein kinase At1g67520 [Brassica napus]
MSTRG.73598.1	BnaC04G0502600ZS	At2g30620	histone H1.2 [Brassica napus]
MSTRG.73914.1	BnaC04G0530000ZS	--	transmembrane protein [Arabidopsis thaliana]
MSTRG.73952.1	BnaC04G0533400ZS	UREG	urease accessory protein G [Brassica napus]
MSTRG.7411.1	BnaA02G0079800ZS	tyrP	tyrosine-specific transport protein isoform X3 [Brassica rapa]
MSTRG.74345.1	BnaC04G0571000ZS	HSPRO2	nematode resistance protein-like HSPRO2 [Brassica napus]
MSTRG.74367.4	BnaC04G0573500ZS	SD18	PREDICTED: receptor-like serine/threonine-protein kinase SD1-8 [Brassica oleracea var. oleracea] [Brassica oleracea]
MSTRG.74377.1	BnaC04G0574600ZS	SOT18	PREDICTED: cytosolic sulfotransferase 18-like [Brassica oleracea var. oleracea] [Brassica oleracea]
MSTRG.7456.1	BnaA02G0083500ZS	NUDT19	nudix hydrolase 19, chloroplastic [Brassica napus]
MSTRG.74665.1	BnaC04G0601700ZS	SLC1	flavanone 3-dioxygenase 3 [Brassica napus]
MSTRG.74665.3	BnaC04G0601700ZS	SLC1	flavanone 3-dioxygenase 3 [Brassica napus]
MSTRG.74665.4	BnaC04G0601700ZS	SLC1	flavanone 3-dioxygenase 3 [Brassica napus]
MSTRG.74665.5	BnaC04G0601700ZS	SLC1	flavanone 3-dioxygenase 3 [Brassica napus]
MSTRG.74695.1	BnaC04G0604300ZS	--	ankyrin repeat/KH domain protein (DUF1442) [Arabidopsis thaliana]
MSTRG.75131.1	BnaC05G0028800ZS	At1g04570	probable folate-biopterin transporter 8, chloroplastic isoform X1 [Brassica napus]
MSTRG.75338.1	MSTRG.75336	--	similar to reverse transcriptase (Pfam: transcript_fact.hmm, score: 72.31) [Arabidopsis thaliana]
MSTRG.75368.1	BnaC05G0053500ZS	RABA2B	ras-related protein RABA2b-like isoform X1 [Brassica napus]
MSTRG.75516.1	MSTRG.75517	--	copia-type retrotransposon polyprotein [Sinapis alba]
MSTRG.75558.1	BnaC05G0070400ZS	--	Plant invertase/pectin methylesterase inhibitor superfamily protein [Arabidopsis thaliana]
MSTRG.75594.1	BnaC05G0073700ZS	At1g09620	leucine--tRNA ligase, cytoplasmic isoform X1 [Brassica napus]
MSTRG.75930.1	BnaC05G0103700ZS	At1g12200	flavin-containing monooxygenase FMO GS-OX-like 2 isoform X1 [Brassica napus]
MSTRG.76433.2	BnaC05G0150300ZS	nvj2	testis-expressed protein 2 [Brassica napus]
MSTRG.76471.1	BnaC05G0153000ZS	At1g18265	BnaC05g14010D [Brassica napus]
MSTRG.76507.1	BnaC05G0156900ZS	XXT5	probable xyloglucan 6-xylosyltransferase 5 isoform X2 [Brassica napus]
MSTRG.76543.1	BnaC05G0160800ZS	TIFY10A	protein TIFY 10A-like [Brassica napus]
MSTRG.76632.1	BnaC05G0169300ZS	GLOX	PREDICTED: galactose oxidase-like [Brassica oleracea var. oleracea] [Brassica oleracea]
MSTRG.7666.1	BnaA02G0105300ZS	At5g59470	mannose-P-dolichol utilization defect 1 protein homolog 1-like [Brassica napus]
MSTRG.76735.1	BnaC05G0177400ZS	MSSP1	monosaccharide-sensing protein 1-like [Brassica napus]
MSTRG.76802.1	BnaC05G0183100ZS	shkC	BnaUnng00750D [Brassica napus]
MSTRG.76832.1	BnaC05G0186500ZS	CML44	probable calcium-binding protein CML44 [Brassica napus]
MSTRG.76913.1	BnaC05G0193100ZS	RAP2-13	ethylene-responsive transcription factor RAP2-13-like [Brassica napus]
MSTRG.76963.1	BnaC05G0197600ZS	RMR3	receptor homology region, transmembrane domain- and RING domain-containing protein 3-like [Brassica napus]
MSTRG.77019.1	BnaC05G0202300ZS	SULTR3;3	PREDICTED: probable sulfate transporter 3.3 [Brassica oleracea var. oleracea] [Brassica oleracea]
MSTRG.77110.1	BnaC05G0210800ZS	UGT74B1	UDP-glycosyltransferase 74B1 [Brassica napus]
MSTRG.77205.1	MSTRG.77204	REM17	PREDICTED: B3 domain-containing protein REM17-like [Brassica oleracea var. oleracea] [Brassica oleracea]
MSTRG.77365.1	BnaC05G0236200ZS	PCN	BnaC05g51090D [Brassica napus]
MSTRG.77580.1	BnaC05G0255300ZS	--	S-adenosyl-L-methionine-dependent methyltransferases superfamily protein [Arabidopsis thaliana]
MSTRG.77725.1	BnaC05G0268800ZS	PUP4	probable purine permease 4 [Brassica napus]
MSTRG.7776.1	BnaA02G0116000ZS	SMAX1	protein SUPPRESSOR OF MAX2 1-like [Brassica napus]
MSTRG.7791.1	BnaA02G0117100ZS	XTH25	probable xyloglucan endotransglucosylase/hydrolase protein 25 [Brassica napus]
MSTRG.78639.1	BnaC05G0365100ZS	UGT71B2	PREDICTED: UDP-glycosyltransferase 71B2-like [Brassica oleracea var. oleracea] [Brassica oleracea]
MSTRG.788.1	Bnascaffold0027G0005800ZS	UGT71C4	UDP-glycosyltransferase 71C4 [Brassica napus]
MSTRG.78853.1	MSTRG.78852	CYP705A22	cytochrome P450 705A22-like isoform X1 [Brassica napus]
MSTRG.790.1	Bnascaffold0027G0006200ZS	UGT71C4	UDP-glycosyltransferase 71C4 [Brassica napus]
MSTRG.79229.1	BnaC05G0427600ZS	--	late embryogenesis abundant protein, group 3-like [Brassica napus]
MSTRG.7929.1	BnaA02G0131900ZS	GAUT12	probable galacturonosyltransferase 12 [Brassica napus]
MSTRG.79551.1	BnaC05G0456000ZS	At3g14580	pentatricopeptide repeat-containing protein At3g14580, mitochondrial [Brassica napus]
MSTRG.79634.1	BnaC05G0463800ZS	GRF5	growth-regulating factor 5-like [Brassica napus]
MSTRG.79880.1	BnaC05G0484200ZS	--	BnaA05g27350D [Brassica napus]
MSTRG.80009.1	BnaC05G0493900ZS	--	hypothetical protein F2Q69_00032001 [Brassica cretica]
MSTRG.80066.2	BnaC05G0499100ZS	--	BnaA05g28560D [Brassica napus]
MSTRG.80163.1	BnaC05G0508700ZS	LTP6	BnaC05g43760D [Brassica napus]
MSTRG.80182.1	BnaC05G0510000ZS	--	PREDICTED: serine-rich adhesin for platelets [Brassica oleracea var. oleracea] [Brassica oleracea]
MSTRG.80392.1	BnaC05G0531400ZS	--	BnaA06g39440D [Brassica napus]
MSTRG.80444.1	BnaC05G0537100ZS	FPP3	PREDICTED: filament-like plant protein 3 [Brassica oleracea var. oleracea] [Brassica oleracea]
MSTRG.80471.1	BnaC05G0540400ZS	ACL1.A1	PREDICTED: acyl carrier protein, chloroplastic [Brassica oleracea var. oleracea] [Brassica oleracea]
MSTRG.80675.1	BnaC05G0561100ZS	SEC13A	protein transport protein SEC13 homolog A [Brassica napus]
MSTRG.80905.1	MSTRG.80904	--	BnaUnng04030D [Brassica napus]
MSTRG.80906.1	MSTRG.80904	--	BnaUnng04030D [Brassica napus]
MSTRG.81088.1	MSTRG.81087	GRDP2	glycine-rich domain-containing protein 2-like isoform X6 [Brassica napus]
MSTRG.81372.1	BnaC06G0056700ZS	ABCG13	PREDICTED: ABC transporter G family member 13 [Brassica oleracea var. oleracea] [Brassica oleracea]
MSTRG.81483.1	BnaC06G0065900ZS	ABA2	PREDICTED: xanthoxin dehydrogenase isoform X1 [Brassica oleracea var. oleracea] [Brassica oleracea]
MSTRG.81534.1	BnaC06G0071200ZS	AOP1.2	PREDICTED: probable 2-oxoglutarate-dependent dioxygenase AOP1 [Brassica oleracea var. oleracea] [Brassica oleracea]
MSTRG.81651.1	BnaC06G0083500ZS	ASIL1	PREDICTED: trihelix transcription factor ASIL1 [Brassica oleracea var. oleracea] [Brassica oleracea]
MSTRG.81901.1	BnaC06G0106900ZS	--	BnaC06g41740D [Brassica napus]
MSTRG.82174.1	BnaC06G0137900ZS	GSTT3	PREDICTED: glutathione S-transferase T3-like [Brassica oleracea var. oleracea] [Brassica oleracea]
MSTRG.82212.1	BnaC06G0142200ZS	CSLE1	cellulose synthase-like protein E1 [Brassica napus]
MSTRG.8288.1	BnaA02G0166000ZS	elmoA	ELMO domain-containing protein A-like isoform X1 [Brassica napus]
MSTRG.82921.1	BnaC06G0214300ZS	RH11	PREDICTED: DEAD-box ATP-dependent RNA helicase 11 [Brassica oleracea var. oleracea] [Brassica oleracea]
MSTRG.8342.1	BnaA02G0172000ZS	--	PREDICTED: phylloplanin-like [Tarenaya hassleriana]
MSTRG.83449.1	BnaC06G0261500ZS	At1g62060	UPF0540 protein At1g62000 [Brassica rapa]
MSTRG.83565.1	BnaC06G0271600ZS	DREB2D	dehydration-responsive element-binding protein 2D [Brassica napus]
MSTRG.83641.1	BnaC06G0278800ZS	CLPB1	PREDICTED: chaperone protein ClpB1-like [Brassica oleracea var. oleracea] [Brassica oleracea]
MSTRG.84573.1	BnaC06G0377400ZS	FAB1C	FAB1C [Arabidopsis thaliana]
MSTRG.84614.1	BnaC06G0381500ZS	TFCE	PREDICTED: tubulin-folding cofactor E [Brassica oleracea var. oleracea] [Brassica oleracea]
MSTRG.84687.2	BnaC06G0388200ZS	BHLH96	PREDICTED: transcription factor bHLH96-like [Brassica oleracea var. oleracea] [Brassica oleracea]
MSTRG.84784.1	BnaC06G0397400ZS	KTI3	bark lectin-like [Brassica napus]
MSTRG.84798.1	BnaC06G0398900ZS	--	protein YLS3-like isoform X2 [Brassica napus]
MSTRG.84877.1	BnaC06G0407000ZS	At1g74360	probable LRR receptor-like serine/threonine-protein kinase At1g74360 [Brassica napus]
MSTRG.84892.1	BnaC06G0408200ZS	ROH1	UPF0496 protein At5g66675-like [Brassica napus]
MSTRG.8506.1	BnaA02G0188400ZS	PMAT2	phenolic glucoside malonyltransferase 2-like [Brassica napus]
MSTRG.85078.1	BnaC06G0424200ZS	ATL8	RING-H2 finger protein ATL8 [Brassica napus]
MSTRG.85112.1	BnaC06G0427100ZS	CML38	PREDICTED: calcium-binding protein CML38 [Brassica oleracea var. oleracea] [Brassica oleracea]
MSTRG.85372.1	BnaC06G0450200ZS	GA2	PREDICTED: ent-kaur-16-ene synthase, chloroplastic [Brassica oleracea var. oleracea] [Brassica oleracea]
MSTRG.85373.2	BnaC06G0450200ZS	GA2	PREDICTED: ent-kaur-16-ene synthase, chloroplastic [Brassica oleracea var. oleracea] [Brassica oleracea]
MSTRG.85402.1	BnaC06G0452400ZS	LPEAT1	lysophospholipid acyltransferase LPEAT1 isoform X1 [Brassica napus]
MSTRG.8578.1	BnaA02G0195500ZS	--	hypothetical protein BRARA_E01643 [Brassica rapa]
MSTRG.86129.1	BnaC07G0064900ZS	BLH7	LOW QUALITY PROTEIN: BEL1-like homeodomain protein 7 [Brassica rapa]
MSTRG.86457.1	BnaC07G0091800ZS	yqxC	BnaA07g04810D [Brassica napus]
MSTRG.8647.1	BnaA02G0201300ZS	AIL1	AP2-like ethylene-responsive transcription factor AIL1 [Brassica napus]
MSTRG.86604.1	MSTRG.86603	At3g23950	PREDICTED: CDKN2A-interacting protein [Brassica oleracea var. oleracea] [Brassica oleracea]
MSTRG.86677.1	BnaC07G0112700ZS	NCED6	PREDICTED: 9-cis-epoxycarotenoid dioxygenase NCED6, chloroplastic [Brassica oleracea var. oleracea] [Brassica oleracea]
MSTRG.86704.1	MSTRG.86703	--	BnaUnng04030D [Brassica napus]
MSTRG.86752.1	BnaC07G0120600ZS	FAO3	PREDICTED: long-chain-alcohol oxidase FAO3 [Brassica oleracea var. oleracea] [Brassica oleracea]
MSTRG.86761.1	BnaC07G0121100ZS	--	RNA-binding (RRM/RBD/RNP motifs) family protein [Arabidopsis thaliana]
MSTRG.86804.1	BnaC07G0125200ZS	PSAF	photosystem I reaction center subunit III, chloroplastic [Brassica napus]
MSTRG.86884.1	BnaC07G0134600ZS	LHCB1.1	chlorophyll a-b binding of LHCII type 1 protein [Brassica napus]
MSTRG.86920.1	BnaC07G0138900ZS	--	LOW protein: protein BOBBER-like protein [Arabidopsis thaliana]
MSTRG.87336.1	BnaC07G0182600ZS	TRM112A	PREDICTED: multifunctional methyltransferase subunit TRM112-like protein At1g22270 [Brassica oleracea var. oleracea] [Brassica oleracea]
MSTRG.87530.1	BnaC07G0203100ZS	SIRK	BnaC07g15800D [Brassica napus]
MSTRG.87610.1	BnaC07G0208700ZS	--	BnaC07g16390D [Brassica napus]
MSTRG.87810.1	BnaC07G0229900ZS	At5g44360	berberine bridge enzyme-like 23 [Brassica napus]
MSTRG.87828.1	BnaC07G0232100ZS	At5g44550	PREDICTED: CASP-like protein 1B1 [Brassica oleracea var. oleracea] [Brassica oleracea]
MSTRG.8786.2	BnaA02G0213800ZS	At1g01500	BnaA02g35900D [Brassica napus]
MSTRG.8801.1	BnaA02G0215000ZS	BZIP44	bZIP transcription factor 44 [Brassica rapa]
MSTRG.88026.1	BnaC07G0248700ZS	rimM	16S rRNA processing protein RimM family [Arabidopsis thaliana]
MSTRG.88146.1	BnaC07G0260500ZS	CYS5	cysteine proteinase inhibitor 5 [Brassica napus]
MSTRG.8865.1	BnaA02G0220400ZS	--	BnaA02g17970D [Brassica napus]
MSTRG.88896.1	BnaC07G0328400ZS	FH9	formin-like protein 9 [Brassica napus]
MSTRG.8899.1	BnaA02G0224200ZS	--	PREDICTED: ABC transporter B family member 1 [Brassica oleracea var. oleracea] [Brassica oleracea]
MSTRG.89556.1	BnaC07G0388900ZS	UGT72E1	UDP-glycosyltransferase 72E1-like [Brassica napus]
MSTRG.8987.1	BnaA02G0233100ZS	BEH4	BES1/BZR1 homolog protein 4-like [Brassica napus]
MSTRG.89936.1	BnaC07G0426700ZS	NIP1-2	aquaporin NIP1-2 [Brassica napus]
MSTRG.90151.1	BnaC07G0449500ZS	PIP1-5	probable aquaporin PIP1-5 isoform X1 [Brassica napus]
MSTRG.90382.1	BnaC07G0474800ZS	AT2S3	napin-1A-like [Brassica napus]
MSTRG.90416.1	BnaC07G0477700ZS	--	BnaA03g48740D [Brassica napus]
MSTRG.90473.1	BnaC07G0484900ZS	At5g39560	PREDICTED: F-box/kelch-repeat protein At5g39560-like [Brassica oleracea var. oleracea] [Brassica oleracea]
MSTRG.90523.1	MSTRG.90522	--	BnaCnng21020D [Brassica napus]
MSTRG.90523.2	MSTRG.90522	--	BnaCnng21020D [Brassica napus]
MSTRG.90652.1	BnaC07G0505200ZS	RSZ23	serine/arginine-rich splicing factor RSZ22 [Brassica napus]
MSTRG.90813.1	BnaC07G0520000ZS	DTX17	protein DETOXIFICATION 17-like isoform X2 [Brassica napus]
MSTRG.90840.1	BnaC07G0522700ZS	ADC2	arginine decarboxylase 2-like [Brassica napus]
MSTRG.9086.1	BnaA02G0243600ZS	VQ11	VQ motif-containing protein 11-like [Brassica napus]
MSTRG.9100.1	BnaA02G0244800ZS	At1g80290	glycosyltransferase family protein 64 C3-like [Brassica napus]
MSTRG.91202.1	BnaC08G0006900ZS	TZF4	PREDICTED: zinc finger CCCH domain-containing protein 2 [Brassica oleracea var. oleracea] [Brassica oleracea]
MSTRG.9140.1	BnaA02G0248600ZS	BRH1	probable E3 ubiquitin-protein ligase RHA1A [Brassica napus]
MSTRG.91515.2	BnaC08G0037400ZS	PER10	PREDICTED: peroxidase 10 [Brassica oleracea var. oleracea] [Brassica oleracea]
MSTRG.91537.1	BnaC08G0039400ZS	--	BnaC05g21960D [Brassica napus]
MSTRG.91792.1	MSTRG.91791	--	BnaAnng14890D [Brassica napus]
MSTRG.91981.1	BnaC08G0083800ZS	CYP83B1	PREDICTED: cytochrome P450 83B1 [Brassica oleracea var. oleracea] [Brassica oleracea]
MSTRG.9202.1	BnaA02G0254800ZS	TOC159	translocase of chloroplast 159, chloroplastic-like [Brassica napus]
MSTRG.92462.1	MSTRG.92461	TGG2	myrosinase MA1 isoform X1 [Brassica napus]
MSTRG.92574.1	BnaC08G0143100ZS	CYS4	PREDICTED: cysteine proteinase inhibitor 4-like [Brassica oleracea var. oleracea] [Brassica oleracea]
MSTRG.92791.1	BnaC08G0164400ZS	At4g25140	oleosin 18.5 kDa-like [Brassica napus]
MSTRG.92881.1	BnaC08G0172300ZS	NAPB	napin-B-like [Brassica napus]
MSTRG.92941.2	BnaC08G0178200ZS	AAC3	PREDICTED: ADP,ATP carrier protein 3, mitochondrial isoform X1 [Brassica oleracea var. oleracea] [Brassica oleracea]
MSTRG.93435.1	MSTRG.93436	--	117M18_33, partial [Brassica rapa]
MSTRG.93435.1	MSTRG.93437	GIP	probable L-type lectin-domain containing receptor kinase VII.2 [Brassica napus]
MSTRG.93554.1	BnaC08G0237000ZS	--	PREDICTED: conserved [Prunus dulcis]
MSTRG.93562.1	BnaC08G0237700ZS	--	BnaAnng05630D [Brassica napus]
MSTRG.9360.1	BnaA02G0272600ZS	--	protein ABHD11 [Brassica rapa]
MSTRG.93620.1	BnaC08G0243100ZS	HIP1	PREDICTED: E3 ubiquitin-protein ligase RNF8-A isoform X2 [Brassica oleracea var. oleracea] [Brassica oleracea]
MSTRG.93637.1	BnaC08G0244500ZS	CML27	probable calcium-binding protein CML27 [Brassica napus]
MSTRG.9422.1	MSTRG.9421	--	PREDICTED: uncharacterized protein LOC106317399 [Brassica oleracea var. oleracea] [Brassica oleracea]
MSTRG.94306.1	BnaC08G0311900ZS	PLP3B	PREDICTED: thioredoxin domain-containing protein PLP3A-like [Brassica oleracea var. oleracea] [Brassica oleracea]
MSTRG.94892.1	BnaC08G0367000ZS	CAMBP25	calmodulin-binding protein 25-like [Brassica napus]
MSTRG.95248.1	BnaC08G0401400ZS	BAP1	BON1-associated protein 1-like isoform X1 [Brassica napus]
MSTRG.95298.1	BnaC08G0410200ZS	CYP20-3	peptidyl-prolyl cis-trans isomerase CYP20-3, chloroplastic [Brassica napus]
MSTRG.95500.1	BnaC08G0424300ZS	Fubp1	far upstream element-binding protein 1-like [Brassica napus]
MSTRG.95531.1	BnaC08G0427200ZS	--	serine/arginine repetitive matrix protein 1 [Brassica napus]
MSTRG.95536.1	BnaC08G0427700ZS	UGT71C3	UDP-glycosyltransferase 71C3-like [Brassica napus]
MSTRG.95837.1	BnaC08G0454900ZS	--	transmembrane protein [Arabidopsis thaliana]
MSTRG.95988.2	MSTRG.95986	MYB51	transcription factor MYB51-like [Brassica napus]
MSTRG.96039.1	BnaC08G0473100ZS	LOX3	Linoleate 13S-lipoxygenase 3-1, chloroplastic isoform B [Glycine soja]
MSTRG.96130.1	BnaC08G0482200ZS	--	PREDICTED: leucine-rich repeat extensin-like protein 3 [Brassica oleracea var. oleracea] [Brassica oleracea]
MSTRG.96438.2	BnaC08G0511100ZS	--	nucleolin 1-like isoform X3 [Brassica napus]
MSTRG.96608.1	BnaC08G0529900ZS	THA1	probable low-specificity L-threonine aldolase 1 [Brassica napus]
MSTRG.9674.1	MSTRG.9670	PMEI12	pectinesterase inhibitor 12 [Brassica rapa]
MSTRG.96957.1	BnaC09G0027100ZS	At3g28510	AAA-ATPase At3g28510-like [Brassica napus]
MSTRG.96959.1	BnaC09G0027200ZS	At3g28580	PREDICTED: ATP-dependent zinc metalloprotease FtsH-like [Brassica oleracea var. oleracea] [Brassica oleracea]
MSTRG.96967.1	BnaC09G0027700ZS	--	BnaA09g02340D [Brassica napus]
MSTRG.96978.1	BnaC09G0028700ZS	ZHD9	PREDICTED: zinc-finger homeodomain protein 9-like [Brassica oleracea var. oleracea] [Brassica oleracea]
MSTRG.97171.1	BnaC09G0046800ZS	At5g26960	PREDICTED: F-box/kelch-repeat protein At5g26960 [Brassica oleracea var. oleracea] [Brassica oleracea]
MSTRG.97408.1	BnaC09G0069900ZS	PMEI11	21 kDa protein [Brassica napus]
MSTRG.97641.1	BnaC09G0090200ZS	RLP57	inactive LRR receptor-like serine/threonine-protein kinase BIR2 [Brassica napus]
MSTRG.97681.1	BnaC09G0094200ZS	--	BnaC06g41740D [Brassica napus]
MSTRG.97694.1	MSTRG.97695	--	hypothetical protein F2Q68_00019103 [Brassica cretica]
MSTRG.97751.1	BnaC09G0099900ZS	--	BnaA09g07870D [Brassica napus]
MSTRG.97777.1	BnaC09G0101600ZS	At5g66150	probable alpha-mannosidase At5g66150 [Brassica napus]
MSTRG.97777.2	BnaC09G0101600ZS	At5g66150	probable alpha-mannosidase At5g66150 [Brassica napus]
MSTRG.97777.3	BnaC09G0101600ZS	At5g66150	probable alpha-mannosidase At5g66150 [Brassica napus]
MSTRG.97828.1	BnaC09G0106700ZS	zfpl1	PREDICTED: zinc finger protein-like 1 homolog [Brassica oleracea var. oleracea] [Brassica oleracea]
MSTRG.97844.1	BnaC09G0107900ZS	--	probable LRR receptor-like serine/threonine-protein kinase At4g20940 [Brassica napus]
MSTRG.97865.1	BnaC09G0111000ZS	NERD	PREDICTED: zinc finger CCCH domain-containing protein 19 [Brassica oleracea var. oleracea] [Brassica oleracea]
MSTRG.97897.1	BnaC09G0114100ZS	NTR2	thioredoxin reductase 2-like [Brassica napus]
MSTRG.97936.1	BnaC09G0119000ZS	BZIP2	PREDICTED: ocs element-binding factor 1-like [Brassica oleracea var. oleracea] [Brassica oleracea]
MSTRG.97945.1	BnaC09G0120200ZS	atad-3	ATPase family AAA domain-containing protein 3C-like isoform X2 [Brassica napus]
MSTRG.97945.2	BnaC09G0120200ZS	atad-3	ATPase family AAA domain-containing protein 3C-like isoform X2 [Brassica napus]
MSTRG.98132.1	BnaC09G0138200ZS	At1g63010	BnaCnng51450D [Brassica napus]
MSTRG.98228.1	BnaC09G0147600ZS	TOM7-1	mitochondrial import receptor subunit TOM7-2 [Brassica napus]
MSTRG.98257.1	BnaC09G0150800ZS	BHLH157	transcription factor bHLH157-like [Brassica napus]
MSTRG.98279.1	BnaC09G0152600ZS	BHLH157	BnaA09g53110D [Brassica napus]
MSTRG.98302.1	BnaC09G0154600ZS	--	PREDICTED: collagen alpha-5(IV) chain [Brassica oleracea var. oleracea] [Brassica oleracea]
MSTRG.98381.1	BnaC09G0164400ZS	IGMT4	indole glucosinolate O-methyltransferase 4 [Brassica napus]
MSTRG.98400.1	BnaC09G0166600ZS	--	BnaC09g12970D [Brassica napus]
MSTRG.98437.1	BnaC09G0170700ZS	EARLI1	proline-rich SAC51 [Brassica napus]
MSTRG.98448.1	BnaC09G0171900ZS	CDS1	phosphatidate cytidylyltransferase 1 isoform X1 [Brassica napus]
MSTRG.98459.1	BnaC09G0172700ZS	At1g62320	CSC1-like protein At1g62320 [Brassica rapa]
MSTRG.98534.1	BnaC09G0183700ZS	At4g11170	BnaC09g51450D [Brassica napus]
MSTRG.98552.1	BnaC09G0185100ZS	At1g60690	probable aldo-keto reductase 3 [Brassica napus]
MSTRG.98557.1	BnaC09G0185400ZS	At1g60710	probable aldo-keto reductase 3 [Brassica napus]
MSTRG.98593.1	BnaC09G0189500ZS	CP31B	BnaC09g14840D [Brassica napus]
MSTRG.98602.1	BnaC09G0190400ZS	--	kunitz trypsin inhibitor 1-like [Brassica napus]
MSTRG.9863.1	MSTRG.9864	RE1	retrovirus-related Pol polyprotein from transposon TNT 1-94 [Trifolium pratense]
MSTRG.98646.1	BnaC09G0194900ZS	--	BnaC09g15340D [Brassica napus]
MSTRG.98686.1	BnaC09G0197700ZS	--	BnaC01g27710D [Brassica napus]
MSTRG.98730.1	BnaC09G0202200ZS	LIP4	PREDICTED: GDSL esterase/lipase LIP-4 [Brassica oleracea var. oleracea] [Brassica oleracea]
MSTRG.98744.1	BnaC09G0202900ZS	PCMP-E64	BnaA09g15330D [Brassica napus]
MSTRG.9876.1	BnaA02G0321900ZS	ddx11	LOW QUALITY PROTEIN: ATP-dependent DNA helicase DDX11-like [Brassica napus]
MSTRG.98781.1	BnaC09G0206900ZS	ATG18H	autophagy-related protein 18h-like isoform X2 [Brassica napus]
MSTRG.98781.2	BnaC09G0206900ZS	ATG18H	autophagy-related protein 18h-like isoform X2 [Brassica napus]
MSTRG.9884.1	BnaA02G0323300ZS	NAC035	NAC domain-containing protein 35 isoform X1 [Brassica rapa]
MSTRG.98952.1	MSTRG.98951	--	protein ALP1-like isoform X1 [Brassica rapa]
MSTRG.99075.1	MSTRG.99076	--	F22C12.1 [Arabidopsis thaliana]
MSTRG.9915.1	BnaA02G0325500ZS	--	BnaA02g26630D [Brassica napus]

## Sheet: cis_diff. annot
lncRNA_ID	GeneID	Symbol	Description
MSTRG.99.2	Bnascaffold0025G0011100ZS	BSMT1	salicylate/benzoate carboxyl methyltransferase [Brassica napus]
MSTRG.99.3	Bnascaffold0025G0011100ZS	BSMT1	salicylate/benzoate carboxyl methyltransferase [Brassica napus]
MSTRG.99.4	Bnascaffold0025G0011100ZS	BSMT1	salicylate/benzoate carboxyl methyltransferase [Brassica napus]
MSTRG.178.1	Bnascaffold0025G0027900ZS	PCMP-E69	pentatricopeptide repeat-containing protein At1g74600, chloroplastic-like [Brassica napus]
MSTRG.181.1	Bnascaffold0025G0027800ZS	--	BnaA09g35270D [Brassica napus]
MSTRG.181.1	Bnascaffold0025G0027900ZS	PCMP-E69	pentatricopeptide repeat-containing protein At1g74600, chloroplastic-like [Brassica napus]
MSTRG.248.1	MSTRG.247	UPL2	PREDICTED: E3 ubiquitin-protein ligase UPL1-like [Brassica oleracea var. oleracea] [Brassica oleracea]
MSTRG.286.1	Bnascaffold0026G0004000ZS	--	PREDICTED: zinc finger BED domain-containing protein RICESLEEPER 2-like [Brassica oleracea var. oleracea] [Brassica oleracea]
MSTRG.286.2	Bnascaffold0026G0004000ZS	--	PREDICTED: zinc finger BED domain-containing protein RICESLEEPER 2-like [Brassica oleracea var. oleracea] [Brassica oleracea]
MSTRG.288.1	Bnascaffold0026G0005200ZS	At5g64080	non-specific lipid-transfer protein-like protein At2g13820 [Brassica napus]
MSTRG.289.1	Bnascaffold0026G0005800ZS	MPC1	mitochondrial pyruvate carrier 1-like [Brassica napus]
MSTRG.289.1	MSTRG.292	At5g20050	PREDICTED: probable receptor-like protein kinase At5g20050 [Brassica oleracea var. oleracea] [Brassica oleracea]
MSTRG.290.1	MSTRG.292	At5g20050	PREDICTED: probable receptor-like protein kinase At5g20050 [Brassica oleracea var. oleracea] [Brassica oleracea]
MSTRG.290.2	MSTRG.292	At5g20050	PREDICTED: probable receptor-like protein kinase At5g20050 [Brassica oleracea var. oleracea] [Brassica oleracea]
MSTRG.388.1	Bnascaffold0026G0017100ZS	THO7B	THO complex subunit 7B [Brassica rapa]
MSTRG.443.1	Bnascaffold0026G0025300ZS	HDG8	homeobox-leucine zipper protein HDG8-like [Brassica napus]
MSTRG.722.1	Bnascaffold0026G0071400ZS	ndhJ	NADH-plastoquinone oxidoreductase subunit J [Morettia canescens]
MSTRG.788.1	Bnascaffold0027G0005600ZS	--	nucleolin 1 isoform X2 [Brassica napus]
MSTRG.788.1	Bnascaffold0027G0005700ZS	--	BnaAnng15840D [Brassica napus]
MSTRG.808.1	Bnascaffold0027G0010900ZS	--	retroelement pol polyprotein-like [Arabidopsis thaliana]
MSTRG.849.1	MSTRG.851	--	BnaC05g28680D [Brassica napus]
MSTRG.887.1	Bnascaffold0027G0024700ZS	pol	F7F22.15 [Arabidopsis thaliana]
MSTRG.937.1	Bnascaffold0027G0039500ZS	WAKL22	wall-associated receptor kinase-like 22 [Brassica napus]
MSTRG.1025.1	Bnascaffold0027G0048700ZS	RPT6A	26S proteasome regulatory subunit 8 homolog A [Brassica rapa]
MSTRG.1025.1	Bnascaffold0027G0048800ZS	RPT6A	26S proteasome regulatory subunit 8 homolog A [Brassica rapa]
MSTRG.1030.1	Bnascaffold0027G0048700ZS	RPT6A	26S proteasome regulatory subunit 8 homolog A [Brassica rapa]
MSTRG.1030.1	Bnascaffold0027G0048800ZS	RPT6A	26S proteasome regulatory subunit 8 homolog A [Brassica rapa]
MSTRG.1060.1	Bnascaffold0027G0055400ZS	FKFBP	6-phosphofructo-2-kinase/fructose-2,6-bisphosphatase [Brassica napus]
MSTRG.1060.1	Bnascaffold0027G0055600ZS	RANBP1B	ran-binding protein 1 homolog a [Brassica napus]
MSTRG.1113.1	Bnascaffold0027G0061700ZS	CCMFN2	ccmFN2 [Brassica oleracea]
MSTRG.1178.1	Bnascaffold0027G0067100ZS	NET1D	protein NETWORKED 1D-like [Brassica napus]
MSTRG.1178.1	Bnascaffold0027G0067500ZS	PAT12	BnaA09g52040D [Brassica napus]
MSTRG.1178.1	Bnascaffold0027G0067600ZS	LIF2	BnaA09g52030D [Brassica napus]
MSTRG.1183.1	MSTRG.1185	AtMg00310	structural maintenance of chromosomes protein 6B-like [Brassica napus]
MSTRG.1184.1	MSTRG.1185	AtMg00310	structural maintenance of chromosomes protein 6B-like [Brassica napus]
MSTRG.1186.1	MSTRG.1185	AtMg00310	structural maintenance of chromosomes protein 6B-like [Brassica napus]
MSTRG.1196.1	MSTRG.1195	ycf68-1	BnaC09g29250D [Brassica napus]
MSTRG.1275.1	Bnascaffold0118G0000100ZS	AtMg01280	orf195 [Brassica oleracea var. botrytis] [Brassica oleracea]
MSTRG.1276.1	Bnascaffold0118G0000100ZS	AtMg01280	orf195 [Brassica oleracea var. botrytis] [Brassica oleracea]
MSTRG.1310.1	Bnascaffold0156G0000400ZS	WAKL22	wall-associated receptor kinase-like 22 [Brassica napus]
MSTRG.1383.1	Bnascaffold0308G0000200ZS	--	agamous-like MADS-box protein AGL80 [Brassica rapa]
MSTRG.1410.1	MSTRG.1408	--	orf101d [Brassica oleracea]
MSTRG.1463.1	Bnascaffold0451G0000100ZS	ndhJ	NADH-plastoquinone oxidoreductase subunit J [Morettia canescens]
MSTRG.1468.1	Bnascaffold0453G0000100ZS	--	unnamed protein product [Brassica rapa]
MSTRG.1469.1	Bnascaffold0453G0000100ZS	--	unnamed protein product [Brassica rapa]
MSTRG.1490.1	Bnascaffold0471G0000100ZS	--	testis- and ovary-specific PAZ domain protein [Arabidopsis thaliana]
MSTRG.1490.1	Bnascaffold0471G0000300ZS	MPC1	mitochondrial pyruvate carrier 1 [Brassica napus]
MSTRG.1490.1	Bnascaffold0471G0000500ZS	DDB_G0282005	BnaA02g04670D [Brassica napus]
MSTRG.1538.1	MSTRG.1541	RE2	BnaC04g13640D [Brassica napus]
MSTRG.1539.1	MSTRG.1541	RE2	BnaC04g13640D [Brassica napus]
MSTRG.1581.1	MSTRG.1579	At5g58090	BnaA10g29260D [Brassica napus]
MSTRG.1581.2	MSTRG.1579	At5g58090	BnaA10g29260D [Brassica napus]
MSTRG.1625.1	MSTRG.1624	--	hypothetical protein F2Q70_00026013 [Brassica cretica]
MSTRG.1642.1	MSTRG.1643	--	BnaC07g15850D [Brassica napus]
MSTRG.1883.1	MSTRG.1880	--	-
MSTRG.1883.1	MSTRG.1884	--	unnamed protein product [Coffea canephora]
MSTRG.1883.1	MSTRG.1885	--	Protein TAR1 [Capsicum baccatum]
MSTRG.2016.1	BnaA01G0004000ZS	--	late embryogenesis abundant protein [Brassica napus]
MSTRG.2016.1	BnaA01G0004200ZS	ATJ10	chaperone protein dnaJ 10 [Brassica rapa]
MSTRG.2016.1	BnaA01G0004300ZS	RPS25E	BnaA06g40740D [Brassica napus]
MSTRG.2016.1	BnaA01G0004600ZS	EC1.4	egg cell-secreted protein 1.4-like [Brassica napus]
MSTRG.2016.1	BnaA01G0004700ZS	CESA2	cellulose synthase A catalytic subunit 2 [UDP-forming] isoform X1 [Brassica rapa]
MSTRG.2016.5	BnaA01G0004200ZS	ATJ10	chaperone protein dnaJ 10 [Brassica rapa]
MSTRG.2016.5	BnaA01G0004300ZS	RPS25E	BnaA06g40740D [Brassica napus]
MSTRG.2016.5	BnaA01G0004600ZS	EC1.4	egg cell-secreted protein 1.4-like [Brassica napus]
MSTRG.2016.5	BnaA01G0004700ZS	CESA2	cellulose synthase A catalytic subunit 2 [UDP-forming] isoform X1 [Brassica rapa]
MSTRG.2058.1	BnaA01G0008600ZS	APK2	adenylyl-sulfate kinase 2, chloroplastic [Brassica napus]
MSTRG.2058.1	BnaA01G0008700ZS	CYP79B1	cytochrome P450 [Brassica napus]
MSTRG.2059.1	BnaA01G0008700ZS	CYP79B1	cytochrome P450 [Brassica napus]
MSTRG.2059.1	BnaA01G0008800ZS	PCMP-E98	pentatricopeptide repeat-containing protein At4g39952, mitochondrial [Brassica rapa]
MSTRG.2059.1	BnaA01G0016000ZS	HMA1	probable cadmium/zinc-transporting ATPase HMA1, chloroplastic [Brassica napus]
MSTRG.2067.1	BnaA01G0009200ZS	NSUN2	RNA cytosine-C(5)-methyltransferase NSUN2 isoform X1 [Brassica rapa]
MSTRG.2067.1	BnaA01G0009300ZS	SRK2F	serine/threonine-protein kinase SRK2F isoform X2 [Brassica rapa]
MSTRG.2067.1	BnaA01G0009500ZS	At2g22425	probable signal peptidase complex subunit 1 [Brassica rapa]
MSTRG.2067.1	BnaA01G0009600ZS	--	transmembrane protein [Arabidopsis thaliana]
MSTRG.2067.1	BnaA01G0009700ZS	SCAI	protein SCAI-like [Brassica napus]
MSTRG.2071.1	MSTRG.2066	HTR4	histone H3.3 [Capsicum annuum]
MSTRG.2071.1	BnaA01G0009500ZS	At2g22425	probable signal peptidase complex subunit 1 [Brassica rapa]
MSTRG.2071.1	BnaA01G0009600ZS	--	transmembrane protein [Arabidopsis thaliana]
MSTRG.2071.1	BnaA01G0009900ZS	ATHB-16	homeobox-leucine zipper protein ATHB-16 isoform X2 [Brassica rapa]
MSTRG.2098.1	BnaA01G0012200ZS	HAT22	homeobox-leucine zipper protein HAT22 [Brassica rapa]
MSTRG.2109.2	BnaA01G0012800ZS	--	light-inducible protein CPRF2 [Brassica napus]
MSTRG.2109.2	BnaA01G0012900ZS	HHP4	heptahelical transmembrane protein 4 [Brassica rapa]
MSTRG.2109.2	BnaA01G0013100ZS	SHR	protein SHORT-ROOT [Brassica napus]
MSTRG.2109.2	BnaA01G0013200ZS	BT5	BTB/POZ and TAZ domain-containing protein 5 [Brassica napus]
MSTRG.2127.1	BnaA01G0014200ZS	--	calcium ion-binding protein [Arabidopsis thaliana]
MSTRG.2127.1	MSTRG.2126	--	BnaAnng33790D [Brassica napus]
MSTRG.2127.1	BnaA01G0014500ZS	AGL66	agamous-like MADS-box protein AGL66 isoform X3 [Brassica rapa]
MSTRG.2127.1	BnaA01G0014600ZS	CYP81F1	cytochrome P450 81F1-like [Brassica napus]
MSTRG.2170.1	BnaA01G0018300ZS	--	Pyridoxal phosphate (PLP)-dependent transferases superfamily protein [Arabidopsis thaliana]
MSTRG.2170.1	BnaA01G0018400ZS	Cdca7l	cell division cycle-associated 7-like protein [Brassica napus]
MSTRG.2170.1	BnaA01G0018500ZS	NUP58	nuclear pore complex protein NUP58 [Brassica napus]
MSTRG.2170.1	BnaA01G0018100ZS	--	BnaCnng39980D [Brassica napus]
MSTRG.2178.1	BnaA01G0018700ZS	Bp10	L-ascorbate oxidase homolog [Brassica napus]
MSTRG.2178.1	BnaA01G0018800ZS	PCMP-H5	pentatricopeptide repeat-containing protein At4g37170-like [Brassica napus]
MSTRG.2178.1	BnaA01G0019000ZS	HCF164	thioredoxin-like protein HCF164, chloroplastic [Brassica napus]
MSTRG.2260.1	BnaA01G0025400ZS	ATJ11	chaperone protein dnaJ 11, chloroplastic-like [Brassica napus]
MSTRG.2260.1	BnaA01G0025500ZS	TLP1	thaumatin-like protein 1b isoform X1 [Brassica napus]
MSTRG.2260.1	BnaA01G0026100ZS	MCA1	protein MID1-COMPLEMENTING ACTIVITY 1 [Brassica rapa]
MSTRG.2260.1	BnaA01G0026000ZS	--	vicilin-like seed storage protein At2g18540 isoform X1 [Brassica rapa]
MSTRG.2281.1	BnaA01G0027900ZS	DDB_G0289029	Regulator of Vps4 activity in the MVB pathway protein [Arabidopsis thaliana]
MSTRG.2302.2	BnaA01G0030100ZS	BIG4	brefeldin A-inhibited guanine nucleotide-exchange protein 4 isoform X1 [Brassica rapa]
MSTRG.2302.1	BnaA01G0030100ZS	BIG4	brefeldin A-inhibited guanine nucleotide-exchange protein 4 isoform X1 [Brassica rapa]
MSTRG.2307.6	BnaA01G0030600ZS	--	AT4g35320/F23E12_120 [Arabidopsis thaliana]
MSTRG.2307.6	BnaA01G0030800ZS	MSSP2	monosaccharide-sensing protein 2 [Brassica rapa]
MSTRG.2319.1	BnaA01G0031400ZS	BSK1	probable serine/threonine-protein kinase At4g35230 [Brassica napus]
MSTRG.2319.1	BnaA01G0031500ZS	--	BnaAnng33150D, partial [Brassica napus]
MSTRG.2323.1	BnaA01G0031300ZS	--	nitrate regulatory gene2 protein [Brassica rapa]
MSTRG.2323.1	BnaA01G0031400ZS	BSK1	probable serine/threonine-protein kinase At4g35230 [Brassica napus]
MSTRG.2332.1	BnaA01G0031900ZS	At4g35180	BnaAnng11580D [Brassica napus]
MSTRG.2332.1	BnaA01G0032200ZS	At4g35120	BnaAnng11610D [Brassica napus]
MSTRG.2337.1	BnaA01G0032400ZS	PIP2-7	aquaporin PIP2-7 [Brassica rapa]
MSTRG.2337.1	BnaA01G0032600ZS	CAT2	catalase-2-like [Brassica napus]
MSTRG.2349.1	BnaA01G0033200ZS	ARAC3	rac-like GTP-binding protein 5 [Setaria italica]
MSTRG.2349.1	BnaA01G0033400ZS	MYB32	transcription factor MYB32 [Brassica rapa]
MSTRG.2351.1	BnaA01G0033400ZS	MYB32	transcription factor MYB32 [Brassica rapa]
MSTRG.2364.1	BnaA01G0034600ZS	MRL1	pentatricopeptide repeat-containing protein MRL1, chloroplastic-like [Brassica napus]
MSTRG.2369.1	BnaA01G0034600ZS	MRL1	pentatricopeptide repeat-containing protein MRL1, chloroplastic-like [Brassica napus]
MSTRG.2369.1	BnaA01G0034700ZS	SAUR23	auxin-induced protein 15A [Brassica rapa]
MSTRG.2369.1	BnaA01G0034800ZS	SAUR20	auxin-induced protein 15A [Brassica rapa]
MSTRG.2371.1	BnaA01G0034600ZS	MRL1	pentatricopeptide repeat-containing protein MRL1, chloroplastic-like [Brassica napus]
MSTRG.2371.1	BnaA01G0034700ZS	SAUR23	auxin-induced protein 15A [Brassica rapa]
MSTRG.2371.1	BnaA01G0034800ZS	SAUR20	auxin-induced protein 15A [Brassica rapa]
MSTRG.2374.1	BnaA01G0035400ZS	--	auxin-responsive protein SAUR50-like [Brassica napus]
MSTRG.2386.1	BnaA01G0035800ZS	ADC2	arginine decarboxylase 2 [Pringlea antiscorbutica]
MSTRG.2386.1	BnaA01G0036000ZS	GATA3	GATA transcription factor 3 [Brassica rapa]
MSTRG.2386.1	BnaA01G0036100ZS	RPS3AB	40S ribosomal protein S3a-2 [Brassica rapa]
MSTRG.2386.1	BnaA01G0036400ZS	--	prostatic spermine-binding-like protein [Arabidopsis thaliana]
MSTRG.2386.1	BnaA01G0035900ZS	CIB22	PREDICTED: NADH dehydrogenase [ubiquinone] 1 beta subcomplex subunit 9-like isoform X1 [Brassica oleracea var. oleracea] [Brassica oleracea]
MSTRG.2386.1	BnaA01G0036300ZS	SQS2	inactive squalene synthase 2 [Brassica napus]
MSTRG.2390.1	BnaA01G0036500ZS	RPS16-1	30S ribosomal protein S16-1, chloroplastic [Brassica napus]
MSTRG.2415.1	BnaA01G0038800ZS	TRI1	protein TRI1 [Brassica rapa]
MSTRG.2415.1	BnaA01G0039000ZS	At2g18990	thioredoxin domain-containing protein 9 homolog [Brassica rapa]
MSTRG.2421.2	BnaA01G0039400ZS	ALDH3I1	aldehyde dehydrogenase family 3 member I1, chloroplastic-like [Brassica napus]
MSTRG.2421.2	BnaA01G0039700ZS	At4g34220	receptor protein kinase-like protein At4g34220 [Brassica rapa]
MSTRG.2421.2	BnaA01G0039900ZS	PGDH1	D-3-phosphoglycerate dehydrogenase 1, chloroplastic [Brassica rapa]
MSTRG.2423.1	BnaA01G0039400ZS	ALDH3I1	aldehyde dehydrogenase family 3 member I1, chloroplastic-like [Brassica napus]
MSTRG.2423.1	BnaA01G0039900ZS	PGDH1	D-3-phosphoglycerate dehydrogenase 1, chloroplastic [Brassica rapa]
MSTRG.2433.1	BnaA01G0040200ZS	At3g62230	F-box protein At3g62230-like [Brassica napus]
MSTRG.2433.1	BnaA01G0040500ZS	UGT73B1	UDP-glycosyltransferase 73B1 [Brassica rapa]
MSTRG.2433.1	BnaA01G0040400ZS	ERG3	D111/G-patch domain-containing protein [Brassica napus]
MSTRG.2435.1	BnaA01G0040500ZS	UGT73B1	UDP-glycosyltransferase 73B1 [Brassica rapa]
MSTRG.2435.1	BnaA01G0040600ZS	UGT73B3	UDP-glucosyl transferase 73B2 [Brassica napus]
MSTRG.2435.1	BnaA01G0040400ZS	ERG3	D111/G-patch domain-containing protein [Brassica napus]
MSTRG.2436.1	BnaA01G0040600ZS	UGT73B3	UDP-glucosyl transferase 73B2 [Brassica napus]
MSTRG.2436.1	BnaA01G0040400ZS	ERG3	D111/G-patch domain-containing protein [Brassica napus]
MSTRG.2460.1	BnaA01G0042500ZS	PDR2	probable manganese-transporting ATPase PDR2 isoform X1 [Brassica napus]
MSTRG.2460.1	BnaA01G0042800ZS	ITPK2	inositol-tetrakisphosphate 1-kinase 2 [Brassica napus]
MSTRG.2460.1	BnaA01G0042900ZS	At4g33760	tRNA synthetase class II (D, K and N) family protein [Brassica napus]
MSTRG.2465.1	BnaA01G0042800ZS	ITPK2	inositol-tetrakisphosphate 1-kinase 2 [Brassica napus]
MSTRG.2465.1	BnaA01G0042900ZS	At4g33760	tRNA synthetase class II (D, K and N) family protein [Brassica napus]
MSTRG.2465.1	BnaA01G0043000ZS	--	cilia- and flagella-associated protein 251 [Brassica napus]
MSTRG.2465.1	BnaA01G0043100ZS	CBSDUF6	DUF21 domain-containing protein At4g33700 [Brassica napus]
MSTRG.2465.2	BnaA01G0042800ZS	ITPK2	inositol-tetrakisphosphate 1-kinase 2 [Brassica napus]
MSTRG.2465.2	BnaA01G0042900ZS	At4g33760	tRNA synthetase class II (D, K and N) family protein [Brassica napus]
MSTRG.2465.2	BnaA01G0043000ZS	--	cilia- and flagella-associated protein 251 [Brassica napus]
MSTRG.2465.2	BnaA01G0043100ZS	CBSDUF6	DUF21 domain-containing protein At4g33700 [Brassica napus]
MSTRG.2534.1	BnaA01G0048800ZS	ATH1	homeobox protein ATH1 [Brassica rapa]
MSTRG.2537.1	BnaA01G0049200ZS	czib	CXXC motif containing zinc binding protein [Brassica rapa]
MSTRG.2537.2	BnaA01G0049200ZS	czib	CXXC motif containing zinc binding protein [Brassica rapa]
MSTRG.2537.3	BnaA01G0049200ZS	czib	CXXC motif containing zinc binding protein [Brassica rapa]
MSTRG.2546.1	BnaA01G0049400ZS	NUP85	nuclear pore complex protein NUP85 [Brassica rapa]
MSTRG.2546.1	BnaA01G0049600ZS	GATA9	GATA transcription factor 9 [Brassica rapa]
MSTRG.2564.1	MSTRG.2563	TOL9	TOM1-like protein 9 isoform X1 [Brassica rapa]
MSTRG.2571.1	BnaA01G0050900ZS	--	transmembrane protein [Arabidopsis thaliana]
MSTRG.2571.1	BnaA01G0051100ZS	LA1	la protein 1-like [Brassica napus]
MSTRG.2613.1	BnaA01G0054300ZS	BT1	adenine nucleotide transporter BT1, chloroplastic/mitochondrial-like [Brassica napus]
MSTRG.2613.1	BnaA01G0054700ZS	--	PREDICTED: zinc finger protein ZIC 2 isoform X2 [Brassica oleracea var. oleracea] [Brassica oleracea]
MSTRG.2613.1	BnaA01G0054500ZS	At3g15720	probable polygalacturonase At3g15720 isoform X1 [Brassica rapa]
MSTRG.2613.1	BnaA01G0054900ZS	SD25	G-type lectin S-receptor-like serine/threonine-protein kinase SD2-5 [Brassica napus]
MSTRG.2620.1	BnaA01G0055200ZS	SD25	G-type lectin S-receptor-like serine/threonine-protein kinase SD2-5 [Brassica napus]
MSTRG.2620.1	BnaA01G0055600ZS	IAA29	auxin-responsive protein IAA29 isoform X1 [Brassica rapa]
MSTRG.2620.1	BnaA01G0055400ZS	--	glycosyltransferase BC10 [Brassica rapa]
MSTRG.2636.1	BnaA01G0056100ZS	VAMP711	vesicle-associated membrane protein 711 [Brassica rapa]
MSTRG.2636.1	BnaA01G0056400ZS	--	Beta-1,3-N-Acetylglucosaminyltransferase family protein [Arabidopsis thaliana]
MSTRG.2636.1	BnaA01G0056600ZS	MICU	calcium uptake protein, mitochondrial isoform X1 [Brassica napus]
MSTRG.2636.1	BnaA01G0056700ZS	ncdn	neurochondrin [Brassica napus]
MSTRG.2647.1	BnaA01G0056700ZS	ncdn	neurochondrin [Brassica napus]
MSTRG.2647.1	BnaA01G0057000ZS	ASP5	aspartate aminotransferase, chloroplastic [Brassica rapa]
MSTRG.2648.1	BnaA01G0057000ZS	ASP5	aspartate aminotransferase, chloroplastic [Brassica rapa]
MSTRG.2657.2	BnaA01G0058100ZS	PGR3	pentatricopeptide repeat-containing protein At4g31850, chloroplastic-like [Brassica napus]
MSTRG.2657.1	BnaA01G0058100ZS	PGR3	pentatricopeptide repeat-containing protein At4g31850, chloroplastic-like [Brassica napus]
MSTRG.2664.1	BnaA01G0058100ZS	PGR3	pentatricopeptide repeat-containing protein At4g31850, chloroplastic-like [Brassica napus]
MSTRG.2664.1	BnaA01G0058200ZS	At2g25060	early nodulin-like protein 1 [Brassica rapa]
MSTRG.2664.1	BnaA01G0058300ZS	--	BnaA08g12340D [Brassica napus]
MSTRG.2687.3	BnaA01G0060000ZS	CSLC5	BnaA01g34810D [Brassica napus]
MSTRG.2687.3	BnaA01G0060300ZS	WRKY11	probable WRKY transcription factor 11 isoform X1 [Brassica napus]
MSTRG.2688.1	BnaA01G0060300ZS	WRKY11	probable WRKY transcription factor 11 isoform X1 [Brassica napus]
MSTRG.2688.1	BnaA01G0060400ZS	EXO70E2	exocyst complex component EXO70A1-like isoform X1 [Brassica napus]
MSTRG.2688.1	MSTRG.2691	CYP71B2	cytochrome P450 71B2 isoform X1 [Brassica rapa]
MSTRG.2715.1	BnaA01G0062600ZS	At4g31240	probable nucleoredoxin 3 [Brassica rapa]
MSTRG.2715.1	BnaA01G0062800ZS	topA	BnaA01g05990D [Brassica napus]
MSTRG.2731.1	BnaA01G0064000ZS	cemA	chloroplast envelope membrane protein-like [Brassica napus]
MSTRG.2731.1	BnaA01G0064200ZS	CBP60F	BnaA01g06120D [Brassica napus]
MSTRG.2731.1	MSTRG.2728	--	non-LTR retroelement reverse transcriptase-like protein [Arabidopsis thaliana]
MSTRG.2738.1	BnaA01G0064600ZS	--	BnaA01g06160D [Brassica napus]
MSTRG.2738.1	BnaA01G0064700ZS	BHLH69	transcription factor bHLH69 [Brassica rapa]
MSTRG.2741.2	MSTRG.2739	--	protein ALP1-like isoform X1 [Brassica rapa]
MSTRG.2744.1	BnaA01G0065000ZS	RPL21M	50S ribosomal protein L21, mitochondrial-like [Brassica napus]
MSTRG.2744.1	BnaA01G0065400ZS	UBP24	ubiquitin carboxyl-terminal hydrolase 24-like [Brassica napus]
MSTRG.2744.1	BnaA01G0065500ZS	--	Bifunctional inhibitor/lipid-transfer protein/seed storage 2S albumin superfamily protein [Arabidopsis thaliana]
MSTRG.2769.3	BnaA01G0066700ZS	EIF(ISO)4G2	LOW QUALITY PROTEIN: eukaryotic translation initiation factor [Brassica rapa]
MSTRG.2769.3	MSTRG.2771	--	BnaAnng32430D [Brassica napus]
MSTRG.2769.4	BnaA01G0066700ZS	EIF(ISO)4G2	LOW QUALITY PROTEIN: eukaryotic translation initiation factor [Brassica rapa]
MSTRG.2769.4	BnaA01G0067500ZS	HMA2	heavy metal ATPase 2.1 [Brassica rapa var. rapa] [Brassica rapa]
MSTRG.2769.5	BnaA01G0066700ZS	EIF(ISO)4G2	LOW QUALITY PROTEIN: eukaryotic translation initiation factor [Brassica rapa]
MSTRG.2769.5	BnaA01G0067500ZS	HMA2	heavy metal ATPase 2.1 [Brassica rapa var. rapa] [Brassica rapa]
MSTRG.2767.4	BnaA01G0067500ZS	HMA2	heavy metal ATPase 2.1 [Brassica rapa var. rapa] [Brassica rapa]
MSTRG.2783.1	MSTRG.2785	--	BnaA08g12960D [Brassica napus]
MSTRG.2784.1	MSTRG.2785	--	BnaA08g12960D [Brassica napus]
MSTRG.2829.1	BnaA01G0072600ZS	ARF16	auxin response factor 16-like [Brassica napus]
MSTRG.2883.2	BnaA01G0077700ZS	--	BnaA01g07420D [Brassica napus]
MSTRG.2883.2	BnaA01G0077800ZS	RPS15AE	BnaA01g07430D [Brassica napus]
MSTRG.2883.2	BnaA01G0077900ZS	At4g29420	BnaA01g07440D [Brassica napus]
MSTRG.2883.2	BnaA01G0078200ZS	VPS15	serine/threonine-protein kinase VPS15 isoform X1 [Brassica rapa]
MSTRG.2899.1	BnaA01G0079500ZS	PFK1	ATP-dependent 6-phosphofructokinase 1 isoform X1 [Eutrema salsugineum]
MSTRG.2899.1	BnaA01G0079700ZS	At4g29190	zinc finger CCCH domain-containing protein 49 [Brassica rapa]
MSTRG.2899.2	BnaA01G0079500ZS	PFK1	ATP-dependent 6-phosphofructokinase 1 isoform X1 [Eutrema salsugineum]
MSTRG.2899.2	BnaA01G0079700ZS	At4g29190	zinc finger CCCH domain-containing protein 49 [Brassica rapa]
MSTRG.2906.1	BnaA01G0080100ZS	BHLH68	transcription factor bHLH68 isoform X2 [Brassica rapa]
MSTRG.2916.1	BnaA01G0080900ZS	SPH1	BnaA01g07870D [Brassica napus]
MSTRG.2916.1	BnaA01G0081200ZS	TCX5	BnaA01g07920D [Brassica napus]
MSTRG.2916.1	BnaA01G0081100ZS	AIM1	peroxisomal fatty acid beta-oxidation multifunctional protein AIM1 [Brassica napus]
MSTRG.2923.1	BnaA01G0081200ZS	TCX5	BnaA01g07920D [Brassica napus]
MSTRG.2923.1	BnaA01G0081400ZS	ARAC7	rac-like GTP-binding protein ARAC7 [Brassica rapa]
MSTRG.2923.1	BnaA01G0081100ZS	AIM1	peroxisomal fatty acid beta-oxidation multifunctional protein AIM1 [Brassica napus]
MSTRG.2923.1	BnaA01G0081500ZS	TOP2	BnaA01g07960D [Brassica napus]
MSTRG.2933.1	BnaA01G0082500ZS	BHLH119	PREDICTED: transcription factor bHLH119-like isoform X1 [Brassica oleracea var. oleracea] [Brassica oleracea]
MSTRG.2933.1	BnaA01G0082600ZS	BHLH119	transcription factor bHLH119-like isoform X2 [Brassica napus]
MSTRG.2945.1	MSTRG.2944	yihV	ketohexokinase [Brassica napus]
MSTRG.2969.1	BnaA01G0086000ZS	--	BnaAnng31360D [Brassica napus]
MSTRG.2969.1	BnaA01G0086300ZS	ERF1A	ethylene-responsive transcription factor 1A [Brassica rapa]
MSTRG.2969.1	BnaA01G0086400ZS	UCH3	BnaAnng21270D [Brassica napus]
MSTRG.2969.2	BnaA01G0086000ZS	--	BnaAnng31360D [Brassica napus]
MSTRG.2969.2	BnaA01G0086300ZS	ERF1A	ethylene-responsive transcription factor 1A [Brassica rapa]
MSTRG.2969.2	BnaA01G0086400ZS	UCH3	BnaAnng21270D [Brassica napus]
MSTRG.3033.1	BnaA01G0091500ZS	--	-
MSTRG.3044.1	BnaA01G0092600ZS	NCED2	9-cis-epoxycarotenoid dioxygenase NCED2, chloroplastic-like [Brassica napus]
MSTRG.3044.1	BnaA01G0092800ZS	DEGP5	protease Do-like 5, chloroplastic [Brassica napus]
MSTRG.3052.1	BnaA01G0093200ZS	TCP2	transcription factor TCP2 [Brassica rapa]
MSTRG.3052.1	BnaA01G0093400ZS	--	E3 ubiquitin-protein ligase RNF19B [Brassica rapa]
MSTRG.3052.1	BnaA01G0093600ZS	--	transmembrane protein [Arabidopsis thaliana]
MSTRG.3057.1	BnaA01G0093400ZS	--	E3 ubiquitin-protein ligase RNF19B [Brassica rapa]
MSTRG.3057.1	BnaA01G0093600ZS	--	transmembrane protein [Arabidopsis thaliana]
MSTRG.3057.1	BnaA01G0093900ZS	DMP4	protein DMP4 [Eutrema salsugineum]
MSTRG.3057.1	BnaA01G0094000ZS	RABA1E	ras-related protein RABA1e [Brassica rapa]
MSTRG.3058.1	BnaA01G0093400ZS	--	E3 ubiquitin-protein ligase RNF19B [Brassica rapa]
MSTRG.3058.1	BnaA01G0093600ZS	--	transmembrane protein [Arabidopsis thaliana]
MSTRG.3058.1	BnaA01G0093900ZS	DMP4	protein DMP4 [Eutrema salsugineum]
MSTRG.3058.1	BnaA01G0094000ZS	RABA1E	ras-related protein RABA1e [Brassica rapa]
MSTRG.3070.1	BnaA01G0095000ZS	At4g18490	BnaA03g58330D [Brassica napus]
MSTRG.3114.1	BnaA01G0098500ZS	PCMP-E101	pentatricopeptide repeat-containing protein At4g18840 [Brassica rapa]
MSTRG.3116.1	BnaA01G0099000ZS	BEH3	BES1/BZR1 homolog protein 3-like [Brassica napus]
MSTRG.3150.1	BnaA01G0101700ZS	CYP707A1	abscisic acid 8'-hydroxylase 1-like isoform X1 [Brassica napus]
MSTRG.3150.1	BnaA01G0101800ZS	--	embryo defective 3006 [Arabidopsis thaliana]
MSTRG.3159.1	BnaA01G0103200ZS	PAE8	pectin acetylesterase 8 [Brassica rapa]
MSTRG.3159.1	BnaA01G0103100ZS	PAE7	pectin acetylesterase 7 [Brassica napus]
MSTRG.3163.1	BnaA01G0103200ZS	PAE8	pectin acetylesterase 8 [Brassica rapa]
MSTRG.3227.1	BnaA01G0109700ZS	GSNAP	gamma-soluble NSF attachment protein [Brassica napus]
MSTRG.3227.1	BnaA01G0109900ZS	SBT2.2	subtilisin-like protease SBT2.2 isoform X1 [Brassica napus]
MSTRG.3227.1	BnaA01G0110200ZS	At4g20460	probable UDP-arabinose 4-epimerase 3 [Brassica rapa]
MSTRG.3235.1	BnaA01G0110800ZS	At4g20800	berberine bridge enzyme-like 17 [Brassica napus]
MSTRG.3235.1	BnaA01G0110900ZS	At4g20820	berberine bridge enzyme-like 18 [Brassica napus]
MSTRG.3254.1	BnaA01G0112300ZS	DOF4.4	dof zinc finger protein DOF4.4-like [Brassica napus]
MSTRG.3254.1	BnaA01G0112400ZS	DOF4.4	dof zinc finger protein DOF4.4 [Brassica rapa]
MSTRG.3254.1	BnaA01G0112000ZS	BHLH162	transcription factor bHLH162 [Brassica rapa]
MSTRG.3255.2	BnaA01G0112200ZS	--	late embryogenesis abundant protein 1-like [Brassica napus]
MSTRG.3255.2	BnaA01G0112500ZS	DOF4.4	dof zinc finger protein DOF4.4-like [Brassica napus]
MSTRG.3255.2	BnaA01G0112600ZS	DOF4.4	dof zinc finger protein DOF4.4 [Brassica rapa]
MSTRG.3269.1	BnaA01G0113500ZS	Os01g0857700	protein BUD31 homolog 1 [Brassica rapa]
MSTRG.3269.1	MSTRG.3270	PXM16	BnaA09g12610D [Brassica napus]
MSTRG.3269.1	BnaA01G0113800ZS	RPN2	dolichyl-diphosphooligosaccharide--protein glycosyltransferase subunit 2 [Brassica rapa]
MSTRG.3280.1	BnaA01G0114800ZS	PSBQ2	oxygen-evolving enhancer protein 3-1, chloroplastic [Brassica rapa]
MSTRG.3280.1	BnaA01G0114900ZS	PCMP-E36	pentatricopeptide repeat-containing protein At4g21300-like [Brassica napus]
MSTRG.3291.1	BnaA01G0116100ZS	PVA42	vesicle-associated protein 4-2 [Brassica napus]
MSTRG.3291.1	BnaA01G0116200ZS	FHY	bifunctional riboflavin kinase/FMN phosphatase [Brassica napus]
MSTRG.3315.1	BnaA01G0117800ZS	CPL1	RNA polymerase II C-terminal domain phosphatase-like 1 [Brassica napus]
MSTRG.3316.1	BnaA01G0117800ZS	CPL1	RNA polymerase II C-terminal domain phosphatase-like 1 [Brassica napus]
MSTRG.3316.1	BnaA01G0117900ZS	NPF7.2	protein NRT1/ PTR FAMILY 7.2 [Brassica napus]
MSTRG.3352.1	MSTRG.3353	AtMg00310	BnaC03g73410D [Brassica napus]
MSTRG.3375.3	BnaA01G0123300ZS	ACER	alkaline ceramidase-like [Brassica napus]
MSTRG.3376.1	BnaA01G0123300ZS	ACER	alkaline ceramidase-like [Brassica napus]
MSTRG.3390.1	BnaA01G0125000ZS	TPPG	probable trehalose-phosphate phosphatase G [Brassica rapa]
MSTRG.3446.2	MSTRG.3447	CRK24	BnaAnng25580D [Brassica napus]
MSTRG.3459.2	BnaA01G0131000ZS	--	BnaCnng42060D [Brassica napus]
MSTRG.3477.1	BnaA01G0132300ZS	--	BnaA01g13290D [Brassica napus]
MSTRG.3535.1	BnaA01G0137300ZS	YSL1	metal-nicotianamine transporter YSL1 [Brassica rapa]
MSTRG.3535.1	BnaA01G0137400ZS	--	BnaA01g13610D [Brassica napus]
MSTRG.3535.1	BnaA01G0137500ZS	BDG3	probable lysophospholipase BODYGUARD 3 [Brassica rapa]
MSTRG.3573.1	BnaA01G0140400ZS	--	BnaC01g41550D [Brassica napus]
MSTRG.3573.1	BnaA01G0140500ZS	GWD2	BnaA01g35130D [Brassica napus]
MSTRG.3589.1	BnaA01G0141700ZS	PUMP4	mitochondrial uncoupling protein 4-like isoform X2 [Brassica napus]
MSTRG.3718.1	BnaA01G0153100ZS	CBP60D	calmodulin-binding protein 60 D [Brassica napus]
MSTRG.3840.1	BnaA01G0164500ZS	COBL11	COBRA-like protein 11 [Brassica rapa]
MSTRG.3840.2	BnaA01G0164500ZS	COBL11	COBRA-like protein 11 [Brassica rapa]
MSTRG.3840.3	BnaA01G0164500ZS	COBL11	COBRA-like protein 11 [Brassica rapa]
MSTRG.3866.2	BnaA01G0166700ZS	VIII-B	myosin-4-like [Brassica napus]
MSTRG.3866.2	BnaA01G0167000ZS	ABCG9	ABC transporter G family member 9 [Brassica rapa]
MSTRG.3872.1	BnaA01G0167300ZS	PORB	protochlorophyllide reductase B, chloroplastic [Brassica rapa]
MSTRG.3872.1	BnaA01G0167400ZS	TSJT1	stem-specific protein TSJT1 [Brassica rapa]
MSTRG.3886.1	BnaA01G0168100ZS	--	2-isopropylmalate synthase [Arabidopsis thaliana]
MSTRG.3886.1	BnaA01G0168200ZS	At4g27520	early nodulin-like protein 2 [Brassica rapa]
MSTRG.3886.1	BnaA01G0168300ZS	PRA1H	PRA1 family protein H-like [Brassica napus]
MSTRG.3887.1	BnaA01G0168100ZS	--	2-isopropylmalate synthase [Arabidopsis thaliana]
MSTRG.3887.1	BnaA01G0168200ZS	At4g27520	early nodulin-like protein 2 [Brassica rapa]
MSTRG.3887.1	BnaA01G0168300ZS	PRA1H	PRA1 family protein H-like [Brassica napus]
MSTRG.3905.2	BnaA01G0170200ZS	--	myelin-associated oligodendrocyte basic protein [Arabidopsis thaliana]
MSTRG.3912.1	BnaA01G0171200ZS	HSP21	25.3 kDa heat shock protein, chloroplastic-like [Brassica napus]
MSTRG.3925.1	BnaA01G0171800ZS	At4g27745	protein yippee-like At4g27745 [Brassica napus]
MSTRG.3925.1	BnaA01G0172200ZS	FEY	retinol dehydrogenase 12-like [Brassica napus]
MSTRG.3925.1	BnaA01G0172300ZS	ACBP2	acyl-CoA-binding domain-containing protein 2 [Brassica napus]
MSTRG.3943.1	BnaA01G0173900ZS	--	BnaC01g20550D [Brassica napus]
MSTRG.3943.1	BnaA01G0174000ZS	At4g28040	WAT1-related protein At4g28040 [Brassica rapa]
MSTRG.3943.1	BnaA01G0174100ZS	TET7	tetraspanin-7 [Brassica rapa]
MSTRG.3943.1	BnaA01G0174200ZS	COX6B-2	cytochrome c oxidase subunit 6b-2 [Brassica rapa]
MSTRG.3943.1	BnaA01G0174300ZS	AFG1L	AFG1-like ATPase [Brassica rapa]
MSTRG.3945.3	BnaA01G0173900ZS	--	BnaC01g20550D [Brassica napus]
MSTRG.3945.3	BnaA01G0174000ZS	At4g28040	WAT1-related protein At4g28040 [Brassica rapa]
MSTRG.3945.3	BnaA01G0174100ZS	TET7	tetraspanin-7 [Brassica rapa]
MSTRG.3945.3	BnaA01G0174300ZS	AFG1L	AFG1-like ATPase [Brassica rapa]
MSTRG.3961.1	MSTRG.3959	--	hAT transposon superfamily protein [Zea mays]
MSTRG.3962.1	BnaA01G0175800ZS	RMA2	E3 ubiquitin-protein ligase RMA2-like [Brassica napus]
MSTRG.3964.1	BnaA01G0175800ZS	RMA2	E3 ubiquitin-protein ligase RMA2-like [Brassica napus]
MSTRG.3964.1	BnaA01G0176100ZS	--	basic salivary proline-rich protein 1-like [Brassica napus]
MSTRG.3964.2	BnaA01G0175800ZS	RMA2	E3 ubiquitin-protein ligase RMA2-like [Brassica napus]
MSTRG.3964.2	BnaA01G0176100ZS	--	basic salivary proline-rich protein 1-like [Brassica napus]
MSTRG.3964.3	BnaA01G0175800ZS	RMA2	E3 ubiquitin-protein ligase RMA2-like [Brassica napus]
MSTRG.3964.3	BnaA01G0176100ZS	--	basic salivary proline-rich protein 1-like [Brassica napus]
MSTRG.3968.1	BnaA01G0176100ZS	--	basic salivary proline-rich protein 1-like [Brassica napus]
MSTRG.3971.1	MSTRG.3973	--	hypothetical protein F2Q69_00050109 [Brassica cretica]
MSTRG.3977.2	BnaA01G0176700ZS	At4g27520	BnaC09g41380D [Brassica napus]
MSTRG.3977.2	BnaA01G0177100ZS	ppt-1	palmitoyl-protein thioesterase 3-like [Brassica napus]
MSTRG.3977.2	BnaA01G0177200ZS	ppt-1	palmitoyl-protein thioesterase 1-like [Brassica napus]
MSTRG.3978.1	BnaA01G0177100ZS	ppt-1	palmitoyl-protein thioesterase 3-like [Brassica napus]
MSTRG.3978.1	BnaA01G0177200ZS	ppt-1	palmitoyl-protein thioesterase 1-like [Brassica napus]
MSTRG.3980.1	BnaA01G0177200ZS	ppt-1	palmitoyl-protein thioesterase 1-like [Brassica napus]
MSTRG.3985.1	BnaA01G0177500ZS	KUA1	transcription factor KUA1 [Brassica rapa]
MSTRG.3986.1	BnaA01G0177500ZS	KUA1	transcription factor KUA1 [Brassica rapa]
MSTRG.3994.1	BnaA01G0177900ZS	VAB	VAN3-binding protein [Brassica napus]
MSTRG.3994.1	BnaA01G0178000ZS	TIP2-2	probable aquaporin TIP2-2 [Brassica rapa]
MSTRG.3994.1	BnaA01G0178200ZS	--	BnaA02g14590D [Brassica napus]
MSTRG.4011.1	BnaA01G0180300ZS	--	MORN [Brassica rapa subsp. pekinensis] [Brassica rapa]
MSTRG.4027.1	BnaA01G0181300ZS	--	BnaA01g18040D [Brassica napus]
MSTRG.4037.1	BnaA01G0182700ZS	ACX1	peroxisomal acyl-coenzyme A oxidase 1 [Brassica rapa]
MSTRG.4042.3	BnaA01G0183000ZS	--	BnaCnng30950D [Brassica napus]
MSTRG.4069.1	BnaA01G0185900ZS	At4g16563	BnaA01g17170D [Brassica napus]
MSTRG.4071.1	BnaA01G0192400ZS	RH1	BnaA01g18280D [Brassica napus]
MSTRG.4138.1	BnaA01G0192400ZS	RH1	BnaA01g18280D [Brassica napus]
MSTRG.4139.1	BnaA01G0192400ZS	RH1	BnaA01g18280D [Brassica napus]
MSTRG.4156.3	BnaA01G0194700ZS	HOMT1	PREDICTED: caffeic acid 3-O-methyltransferase-like [Brassica oleracea var. oleracea] [Brassica oleracea]
MSTRG.4166.3	BnaA01G0195200ZS	At4g15545	BnaA01g18410D [Brassica napus]
MSTRG.4171.1	BnaA01G0195700ZS	PPD1	psbP domain-containing protein 1, chloroplastic isoform X1 [Brassica napus]
MSTRG.4171.1	BnaA01G0195800ZS	WDR3	WD repeat-containing protein 3-like [Brassica napus]
MSTRG.4208.1	BnaA01G0199400ZS	--	BnaAnng10440D [Brassica napus]
MSTRG.4208.2	BnaA01G0199400ZS	--	BnaAnng10440D [Brassica napus]
MSTRG.4237.1	BnaA01G0201500ZS	PCMP-H3	pentatricopeptide repeat-containing protein At4g14820 [Brassica rapa]
MSTRG.4239.1	BnaA01G0201900ZS	PBD1	proteasome subunit beta type-2-A [Brassica rapa]
MSTRG.4239.1	BnaA01G0202000ZS	SUV3	DExH-box ATP-dependent RNA helicase DExH16, mitochondrial [Brassica napus]
MSTRG.4245.1	BnaA01G0201900ZS	PBD1	proteasome subunit beta type-2-A [Brassica rapa]
MSTRG.4245.1	BnaA01G0202000ZS	SUV3	DExH-box ATP-dependent RNA helicase DExH16, mitochondrial [Brassica napus]
MSTRG.4245.1	MSTRG.4246	DOR	F-box protein DOR-like [Brassica napus]
MSTRG.4245.1	MSTRG.4244	DOR	F-box protein DOR-like [Brassica napus]
MSTRG.4257.1	BnaA01G0203000ZS	LFG1	BI1-like protein [Brassica napus]
MSTRG.4286.1	BnaA01G0205800ZS	IMK2	probably inactive leucine-rich repeat receptor-like protein kinase IMK2 [Brassica rapa]
MSTRG.4286.2	BnaA01G0205800ZS	IMK2	probably inactive leucine-rich repeat receptor-like protein kinase IMK2 [Brassica rapa]
MSTRG.4329.1	MSTRG.4330	--	RVP_2 domain-containing protein [Cephalotus follicularis]
MSTRG.4329.1	MSTRG.4331	--	BnaC06g07940D [Brassica napus]
MSTRG.4333.1	MSTRG.4331	--	BnaC06g07940D [Brassica napus]
MSTRG.4333.1	MSTRG.4332	--	hypothetical protein F2Q69_00027538 [Brassica cretica]
MSTRG.4339.1	BnaA01G0211700ZS	--	extensin [Capsella rubella]
MSTRG.4339.1	BnaA01G0211800ZS	--	BnaA01g35550D [Brassica napus]
MSTRG.4375.1	BnaA01G0216100ZS	PUB30	U-box domain-containing protein 30-like [Brassica napus]
MSTRG.4375.1	BnaA01G0216400ZS	PP2A10	protein PHLOEM PROTEIN 2-LIKE A10-like [Brassica napus]
MSTRG.4375.1	BnaA01G0216300ZS	--	BSD domain-containing protein [Arabidopsis thaliana]
MSTRG.4375.2	BnaA01G0216100ZS	PUB30	U-box domain-containing protein 30-like [Brassica napus]
MSTRG.4375.2	BnaA01G0216300ZS	--	BSD domain-containing protein [Arabidopsis thaliana]
MSTRG.4375.4	BnaA01G0216100ZS	PUB30	U-box domain-containing protein 30-like [Brassica napus]
MSTRG.4375.4	BnaA01G0216300ZS	--	BSD domain-containing protein [Arabidopsis thaliana]
MSTRG.4375.3	BnaA01G0216100ZS	PUB30	U-box domain-containing protein 30-like [Brassica napus]
MSTRG.4375.3	BnaA01G0216400ZS	PP2A10	protein PHLOEM PROTEIN 2-LIKE A10-like [Brassica napus]
MSTRG.4375.3	BnaA01G0216300ZS	--	BSD domain-containing protein [Arabidopsis thaliana]
MSTRG.4375.5	BnaA01G0216100ZS	PUB30	U-box domain-containing protein 30-like [Brassica napus]
MSTRG.4375.5	BnaA01G0216400ZS	PP2A10	protein PHLOEM PROTEIN 2-LIKE A10-like [Brassica napus]
MSTRG.4375.5	BnaA01G0216300ZS	--	BSD domain-containing protein [Arabidopsis thaliana]
MSTRG.4377.1	BnaA01G0216300ZS	--	BSD domain-containing protein [Arabidopsis thaliana]
MSTRG.4387.1	BnaA01G0217600ZS	--	At3g49550 [Arabidopsis thaliana]
MSTRG.4402.1	MSTRG.4403	--	BnaA06g16030D [Brassica napus]
MSTRG.4415.1	BnaA01G0220100ZS	PER34	peroxidase 34 [Brassica napus]
MSTRG.4417.1	MSTRG.4414	FRO4	PREDICTED: ferric reduction oxidase 4-like [Raphanus sativus]
MSTRG.4417.1	BnaA01G0220100ZS	PER34	peroxidase 34 [Brassica napus]
MSTRG.4418.1	BnaA01G0220300ZS	At5g19830	BnaC01g42360D [Brassica napus]
MSTRG.4429.1	BnaA01G0221500ZS	At3g48880	F-box/LRR-repeat protein At3g48880 [Brassica napus]
MSTRG.4432.1	BnaA01G0221500ZS	At3g48880	F-box/LRR-repeat protein At3g48880 [Brassica napus]
MSTRG.4432.1	BnaA01G0221900ZS	--	protein bicaudal C homolog 1-A-like [Brassica napus]
MSTRG.4432.1	BnaA01G0222000ZS	LCB2b	long chain base biosynthesis protein 2b-like isoform X1 [Brassica napus]
MSTRG.4439.1	BnaA01G0222400ZS	CXE12	probable carboxylesterase 12 [Brassica napus]
MSTRG.4445.1	BnaA01G0222700ZS	NPC6	non-specific phospholipase C6 [Brassica rapa]
MSTRG.4445.3	BnaA01G0222700ZS	NPC6	non-specific phospholipase C6 [Brassica rapa]
MSTRG.4448.1	BnaA01G0223200ZS	XTH11	probable xyloglucan endotransglucosylase/hydrolase protein 11 [Brassica rapa]
MSTRG.4449.1	BnaA01G0223200ZS	XTH11	probable xyloglucan endotransglucosylase/hydrolase protein 11 [Brassica rapa]
MSTRG.4467.1	BnaA01G0225200ZS	SETH6	BTB/POZ domain-containing protein SETH6-like [Brassica napus]
MSTRG.4467.2	BnaA01G0225200ZS	SETH6	BTB/POZ domain-containing protein SETH6-like [Brassica napus]
MSTRG.4497.1	BnaA01G0229000ZS	TUBB2	tubulin beta-2 chain-like isoform X1 [Brassica napus]
MSTRG.4508.1	MSTRG.4509	UGT76E11	UDP-glycosyltransferase 76E11 [Brassica napus]
MSTRG.4515.1	BnaA01G0231800ZS	SCL30	scarecrow-like protein 30 isoform X1 [Brassica napus]
MSTRG.4518.1	BnaA01G0231800ZS	SCL30	scarecrow-like protein 30 isoform X1 [Brassica napus]
MSTRG.4520.1	BnaA01G0231800ZS	SCL30	scarecrow-like protein 30 isoform X1 [Brassica napus]
MSTRG.4567.3	BnaA01G0236700ZS	KIN14F	kinesin-like protein KIN-14F [Brassica napus]
MSTRG.4567.4	BnaA01G0236700ZS	KIN14F	kinesin-like protein KIN-14F [Brassica napus]
MSTRG.4616.1	MSTRG.4614	--	F15O4.13 [Arabidopsis thaliana]
MSTRG.4678.1	MSTRG.4679	--	collagen alpha-1(I) chain-like, partial [Brassica rapa]
MSTRG.4682.1	BnaA01G0246900ZS	--	ethylene responsive element binding factor -related [Brassica oleracea]
MSTRG.4707.1	MSTRG.4705	--	BnaAnng16700D [Brassica napus]
MSTRG.4707.1	MSTRG.4708	--	BnaAnng16700D [Brassica napus]
MSTRG.4707.1	MSTRG.4709	--	ethylene responsive element binding factor -related [Brassica oleracea]
MSTRG.4776.1	MSTRG.4777	--	PREDICTED: LOW QUALITY PROTEIN: omega-hydroxypalmitate O-feruloyl transferase [Brassica oleracea var. oleracea] [Brassica oleracea]
MSTRG.4819.1	BnaA01G0264100ZS	MSL3	mechanosensitive ion channel protein 3, chloroplastic-like isoform X2 [Brassica napus]
MSTRG.4819.2	BnaA01G0264100ZS	MSL3	mechanosensitive ion channel protein 3, chloroplastic-like isoform X2 [Brassica napus]
MSTRG.4828.2	BnaA01G0265100ZS	--	BnaCnng62220D, partial [Brassica napus]
MSTRG.4828.1	BnaA01G0265100ZS	--	BnaCnng62220D, partial [Brassica napus]
MSTRG.4838.1	MSTRG.4839	RE2	gag/pol polyprotein [Arabidopsis thaliana]
MSTRG.4865.1	BnaA01G0269400ZS	RH22	DEAD-box ATP-dependent RNA helicase 22-like [Brassica napus]
MSTRG.4865.1	BnaA01G0273500ZS	--	pheromone-processing carboxypeptidase KEX1-like isoform X2 [Brassica napus]
MSTRG.4866.1	BnaA01G0269400ZS	RH22	DEAD-box ATP-dependent RNA helicase 22-like [Brassica napus]
MSTRG.4871.1	BnaA01G0270000ZS	--	BnaC05g15510D [Brassica napus]
MSTRG.4883.2	BnaA01G0270800ZS	TPS10	probable alpha,alpha-trehalose-phosphate synthase [UDP-forming] 10 [Brassica napus]
MSTRG.4889.1	BnaA01G0271300ZS	RBM25	RNA-binding protein 25 [Brassica napus]
MSTRG.4865.2	BnaA01G0273500ZS	--	pheromone-processing carboxypeptidase KEX1-like isoform X2 [Brassica napus]
MSTRG.4865.2	BnaA01G0273200ZS	ABC4	probable BOI-related E3 ubiquitin-protein ligase 3 [Brassica napus]
MSTRG.4910.1	BnaA01G0273500ZS	--	pheromone-processing carboxypeptidase KEX1-like isoform X2 [Brassica napus]
MSTRG.4910.1	BnaA01G0273200ZS	ABC4	probable BOI-related E3 ubiquitin-protein ligase 3 [Brassica napus]
MSTRG.4921.1	BnaA01G0274500ZS	AP1M2	AP-1 complex subunit mu-2 [Brassica napus]
MSTRG.4939.1	BnaA01G0275600ZS	IRT3	fe(2+) transport protein 3, chloroplastic-like [Brassica napus]
MSTRG.4949.1	MSTRG.4950	At2g29880	BnaC08g09460D [Brassica napus]
MSTRG.4950.1	MSTRG.4952	VIP5	protein RTF1 homolog [Brassica napus]
MSTRG.4981.1	BnaA01G0279500ZS	GLP8	BnaA01g22650D [Brassica napus]
MSTRG.4981.1	BnaA01G0279600ZS	--	-
MSTRG.4981.2	BnaA01G0279500ZS	GLP8	BnaA01g22650D [Brassica napus]
MSTRG.4981.2	BnaA01G0279600ZS	--	-
MSTRG.5007.1	BnaA01G0282200ZS	BAN	anthocyanidin reductase-like [Brassica napus]
MSTRG.5007.1	BnaA01G0282400ZS	At1g61730	probable transcription factor At1g61730 [Brassica napus]
MSTRG.5007.1	BnaA01G0282500ZS	At1g61740	sulfite exporter TauE/SafE family protein 2-like [Brassica napus]
MSTRG.5036.1	BnaA01G0285100ZS	SYP32	syntaxin-32 isoform X1 [Brassica rapa]
MSTRG.5047.1	BnaA01G0286300ZS	PHL2	BnaA01g23340D [Brassica napus]
MSTRG.5051.1	BnaA01G0286800ZS	--	BnaC01g30490D [Brassica napus]
MSTRG.5072.1	BnaA01G0289200ZS	KIN12B	kinesin-like protein KIN-12B isoform X2 [Brassica napus]
MSTRG.5072.1	BnaA01G0289500ZS	--	BnaCnng29880D [Brassica napus]
MSTRG.5087.1	BnaA01G0290800ZS	Gba2	non-lysosomal glucosylceramidase-like [Brassica napus]
MSTRG.5105.1	BnaA01G0293000ZS	XBAT35	BnaC01g30990D [Brassica napus]
MSTRG.5105.2	BnaA01G0293000ZS	XBAT35	BnaC01g30990D [Brassica napus]
MSTRG.5106.1	MSTRG.5108	OsI_27673	pre-mRNA-splicing factor SLU7-like [Brassica napus]
MSTRG.5119.1	BnaA01G0294800ZS	SUP	transcriptional regulator SUPERMAN [Brassica napus]
MSTRG.5132.1	BnaA01G0297200ZS	CML11	calmodulin-like protein 8 [Brassica rapa]
MSTRG.5143.1	MSTRG.5142	--	BnaC05g10410D [Brassica napus]
MSTRG.5179.1	BnaA01G0301800ZS	UBL5	ubiquitin-like protein 5 [Panicum miliaceum]
MSTRG.5179.1	BnaA01G0302000ZS	RH53	DEAD-box ATP-dependent RNA helicase 53, mitochondrial-like [Brassica napus]
MSTRG.5182.1	BnaA01G0301800ZS	UBL5	ubiquitin-like protein 5 [Panicum miliaceum]
MSTRG.5182.1	BnaA01G0302000ZS	RH53	DEAD-box ATP-dependent RNA helicase 53, mitochondrial-like [Brassica napus]
MSTRG.5191.2	BnaA01G0302600ZS	RPL27C	60S ribosomal protein L27-3 [Brassica rapa]
MSTRG.5191.2	MSTRG.5194	CRK10	cysteine-rich receptor-like protein kinase 10 isoform X2 [Brassica rapa]
MSTRG.5192.1	MSTRG.5194	CRK10	cysteine-rich receptor-like protein kinase 10 isoform X2 [Brassica rapa]
MSTRG.5192.1	BnaA01G0302700ZS	POP2	gamma-aminobutyrate transaminase POP2, mitochondrial-like isoform X1 [Brassica napus]
MSTRG.5202.1	MSTRG.5204	RE2	disease resistance protein [Brassica rapa subsp. pekinensis] [Brassica rapa]
MSTRG.5202.1	BnaA01G0303100ZS	VQ22	PREDICTED: VQ motif-containing protein 22-like [Brassica oleracea var. oleracea] [Brassica oleracea]
MSTRG.5203.1	MSTRG.5201	RE2	disease resistance protein [Brassica rapa subsp. pekinensis] [Brassica rapa]
MSTRG.5203.1	BnaA01G0303100ZS	VQ22	PREDICTED: VQ motif-containing protein 22-like [Brassica oleracea var. oleracea] [Brassica oleracea]
MSTRG.5219.1	BnaA01G0304300ZS	PEX22	peroxisome biogenesis protein 22 isoform X1 [Brassica napus]
MSTRG.5229.1	MSTRG.5228	--	F5M15.26 [Arabidopsis thaliana]
MSTRG.5229.1	BnaA01G0305100ZS	UGT71B2	UDP-glycosyltransferase 71B2 [Brassica rapa]
MSTRG.5229.1	BnaA01G0305200ZS	VUP1	BnaA01g24920D [Brassica napus]
MSTRG.5229.1	MSTRG.5230	--	meiosis-specific protein ASY2-like [Brassica napus]
MSTRG.5235.1	BnaA01G0305200ZS	VUP1	BnaA01g24920D [Brassica napus]
MSTRG.5235.1	BnaA01G0305300ZS	spg1	septum-promoting GTP-binding protein 1 [Brassica rapa]
MSTRG.5241.2	BnaA01G0305900ZS	NPF6.4	protein NRT1/ PTR FAMILY 6.4 [Brassica rapa]
MSTRG.5258.1	MSTRG.5253	--	BnaA01g25030D [Brassica napus]
MSTRG.5294.1	BnaA01G0309800ZS	--	translocation protein-like protein [Arabidopsis thaliana]
MSTRG.5294.1	BnaA01G0310100ZS	SMR13	cyclin-dependent protein kinase inhibitor SMR13-like [Brassica napus]
MSTRG.5294.1	MSTRG.5296	LIL3.2	light-harvesting complex-like protein 3 isotype 2, chloroplastic [Eutrema salsugineum]
MSTRG.5301.1	BnaA01G0311400ZS	CNOT9	BnaA01g36820D [Brassica napus]
MSTRG.5301.1	BnaA01G0311600ZS	EIN3	protein ETHYLENE INSENSITIVE 3-like [Brassica rapa]
MSTRG.5311.1	BnaA01G0312900ZS	At3g20650	mRNA cap guanine-N7 methyltransferase 1-like isoform X1 [Brassica napus]
MSTRG.5311.1	BnaA01G0312800ZS	At3g20670	probable histone H2A.2 [Brassica rapa]
MSTRG.5328.1	BnaA01G0315200ZS	EHD1	EH domain-containing protein 1-like [Brassica napus]
MSTRG.5328.2	BnaA01G0315200ZS	EHD1	EH domain-containing protein 1-like [Brassica napus]
MSTRG.5332.1	BnaA01G0316000ZS	UBC19	ubiquitin-conjugating enzyme E2 19-like [Brassica napus]
MSTRG.5332.1	BnaA01G0316100ZS	CCT1	T-complex protein 1 subunit alpha [Brassica rapa]
MSTRG.5334.2	BnaA01G0316000ZS	UBC19	ubiquitin-conjugating enzyme E2 19-like [Brassica napus]
MSTRG.5334.2	BnaA01G0316400ZS	CHR27	helicase-like transcription factor CHR27 [Brassica rapa]
MSTRG.5334.2	BnaA01G0316100ZS	CCT1	T-complex protein 1 subunit alpha [Brassica rapa]
MSTRG.5335.1	BnaA01G0316500ZS	TOM40-1	BnaA01g25720D [Brassica napus]
MSTRG.5335.1	BnaA01G0316100ZS	CCT1	T-complex protein 1 subunit alpha [Brassica rapa]
MSTRG.5355.2	BnaA01G0317600ZS	NBP35	cytosolic Fe-S cluster assembly factor NBP35-like [Brassica napus]
MSTRG.5355.2	BnaA01G0317400ZS	--	AP-5 complex subunit beta-1-like isoform X1 [Brassica napus]
MSTRG.5355.2	BnaA01G0317800ZS	At3g19850	BnaA01g25860D [Brassica napus]
MSTRG.5387.2	BnaA01G0320100ZS	--	BnaA01g26070D [Brassica napus]
MSTRG.5387.2	BnaA01G0320300ZS	HAT3.1	homeobox protein HAT3.1-like [Brassica napus]
MSTRG.5387.2	BnaA01G0320500ZS	BHLH113	transcription factor bHLH113 isoform X1 [Brassica rapa]
MSTRG.5399.1	MSTRG.5398	pol	PREDICTED: RNA-directed DNA polymerase homolog [Brassica oleracea var. oleracea] [Brassica oleracea]
MSTRG.5399.1	BnaA01G0321700ZS	LAG2	LAG1 longevity assurance homolog 2-like isoform X1 [Brassica napus]
MSTRG.5399.1	BnaA01G0321800ZS	SKIP30	F-box/kelch-repeat protein SKIP30 [Brassica rapa]
MSTRG.5411.1	BnaA01G0323000ZS	JGB	BnaA01g26340D [Brassica napus]
MSTRG.5424.1	BnaA01G0324400ZS	ACT2	actin 8 [Arabidopsis thaliana]
MSTRG.5446.1	BnaA01G0326600ZS	ASPG1	protein ASPARTIC PROTEASE IN GUARD CELL 1 [Brassica rapa]
MSTRG.5446.1	BnaA01G0326700ZS	CASP	protein CASP [Brassica rapa]
MSTRG.5471.1	MSTRG.5470	UBI11	polyubiquitin-like [Durio zibethinus]
MSTRG.5471.1	BnaA01G0328400ZS	--	BnaC05g35140D [Brassica napus]
MSTRG.5497.3	BnaA01G0330000ZS	--	histone H1 [Brassica napus]
MSTRG.5497.3	BnaA01G0330700ZS	At5g25475	B3 domain-containing protein At5g25470-like isoform X1 [Brassica napus]
MSTRG.5497.3	BnaA01G0330600ZS	Galm	aldose 1-epimerase-like [Brassica napus]
MSTRG.5498.1	BnaA01G0330000ZS	--	histone H1 [Brassica napus]
MSTRG.5498.1	BnaA01G0330600ZS	Galm	aldose 1-epimerase-like [Brassica napus]
MSTRG.5499.1	BnaA01G0330000ZS	--	histone H1 [Brassica napus]
MSTRG.5499.1	BnaA01G0330600ZS	Galm	aldose 1-epimerase-like [Brassica napus]
MSTRG.5500.1	BnaA01G0330000ZS	--	histone H1 [Brassica napus]
MSTRG.5500.1	BnaA01G0330600ZS	Galm	aldose 1-epimerase-like [Brassica napus]
MSTRG.5511.1	BnaA01G0331300ZS	IREH1	probable serine/threonine protein kinase IREH1 [Brassica rapa]
MSTRG.5511.1	BnaA01G0331400ZS	RLK902	probable inactive receptor kinase RLK902 isoform X1 [Brassica napus]
MSTRG.5518.1	BnaA01G0332000ZS	At3g17710	F-box protein At3g17710-like [Brassica napus]
MSTRG.5523.1	BnaA01G0332300ZS	AGD15	BnaA01g27890D [Brassica napus]
MSTRG.5523.1	BnaA01G0332400ZS	YSL5	probable metal-nicotianamine transporter YSL5 isoform X1 [Brassica napus]
MSTRG.5547.1	BnaA01G0334400ZS	--	E3 ubiquitin-protein ligase ORTHRUS 2-like [Brassica napus]
MSTRG.5547.1	BnaA01G0334600ZS	At3g17430	probable sugar phosphate/phosphate translocator At3g17430 [Brassica napus]
MSTRG.5547.1	MSTRG.5543	--	BnaCnng16790D [Brassica napus]
MSTRG.5575.1	BnaA01G0337300ZS	BHLH147	BnaA01g27410D [Brassica napus]
MSTRG.5576.1	BnaA01G0337300ZS	BHLH147	BnaA01g27410D [Brassica napus]
MSTRG.5580.1	MSTRG.5578	--	J domain-containing protein required for chloroplast accumulation response 1-like [Brassica napus]
MSTRG.5585.1	BnaA01G0338200ZS	At3g16740	BnaA01g27490D [Brassica napus]
MSTRG.5598.1	MSTRG.5597	pol	retroelement pol polyprotein-like [Arabidopsis thaliana]
MSTRG.5626.1	BnaA01G0342100ZS	MBP2	myrosinase-binding protein 2-like [Brassica napus]
MSTRG.5626.1	BnaA01G0342200ZS	NSP2	nitrile-specifier protein 2-like [Brassica napus]
MSTRG.5679.1	BnaA01G0346900ZS	GRXS15	monothiol glutaredoxin-S15, mitochondrial [Brassica rapa]
MSTRG.5687.1	BnaA01G0348100ZS	NAC056	NAC transcription factor 56-like [Brassica napus]
MSTRG.5687.1	BnaA01G0348000ZS	CYP37	BnaCnng30330D [Brassica napus]
MSTRG.5690.1	BnaA01G0348100ZS	NAC056	NAC transcription factor 56-like [Brassica napus]
MSTRG.5768.1	BnaA01G0354200ZS	FAB1B	1-phosphatidylinositol-3-phosphate 5-kinase FAB1B-like [Brassica napus]
MSTRG.5769.1	BnaA01G0354300ZS	--	BnaC02g19240D [Brassica napus]
MSTRG.5769.1	BnaA01G0354200ZS	FAB1B	1-phosphatidylinositol-3-phosphate 5-kinase FAB1B-like [Brassica napus]
MSTRG.5773.2	BnaA01G0354700ZS	SAC2	phosphoinositide phosphatase SAC2-like [Brassica napus]
MSTRG.5773.2	BnaA01G0354900ZS	PANS1	protein PATRONUS 1-like [Brassica napus]
MSTRG.5773.3	BnaA01G0354700ZS	SAC2	phosphoinositide phosphatase SAC2-like [Brassica napus]
MSTRG.5773.3	BnaA01G0354900ZS	PANS1	protein PATRONUS 1-like [Brassica napus]
MSTRG.5774.1	BnaA01G0354700ZS	SAC2	phosphoinositide phosphatase SAC2-like [Brassica napus]
MSTRG.5774.1	BnaA01G0354900ZS	PANS1	protein PATRONUS 1-like [Brassica napus]
MSTRG.5774.2	BnaA01G0354700ZS	SAC2	phosphoinositide phosphatase SAC2-like [Brassica napus]
MSTRG.5774.2	BnaA01G0354900ZS	PANS1	protein PATRONUS 1-like [Brassica napus]
MSTRG.5793.1	BnaA01G0356600ZS	GRF5	growth-regulating factor 5-like isoform X1 [Brassica napus]
MSTRG.5793.1	MSTRG.5795	--	BnaA03g18950D [Brassica napus]
MSTRG.5793.1	MSTRG.5791	RAP2-2	ethylene-responsive transcription factor RAP2-2 [Brassica rapa]
MSTRG.5810.1	BnaA01G0358400ZS	LDL2	lysine-specific histone demethylase 1 homolog 2 [Brassica rapa]
MSTRG.5817.1	BnaA01G0358700ZS	HD16	BnaA01g37130D [Brassica napus]
MSTRG.5817.1	BnaA01G0358800ZS	HD16	casein kinase 1-like protein HD16 [Brassica napus]
MSTRG.5819.1	BnaA01G0358900ZS	DIR3	dirigent protein 3 [Brassica rapa]
MSTRG.5819.1	BnaA01G0359000ZS	DIR3	dirigent protein 22 [Brassica rapa]
MSTRG.5819.1	BnaA01G0359100ZS	DIR3	dirigent protein 22-like [Brassica napus]
MSTRG.5819.1	BnaA01G0359200ZS	ABCE1	BnaA01g37290D [Brassica napus]
MSTRG.5899.1	BnaA01G0366100ZS	SAP5	zinc finger A20 and AN1 domain-containing stress-associated protein 5 [Brassica rapa]
MSTRG.5899.1	MSTRG.5900	--	uncharacterized protein LOC106368935 [Brassica napus]
MSTRG.5899.1	MSTRG.5901	PP2C38	probable protein phosphatase 2C 38 [Brassica napus]
MSTRG.5899.1	BnaA01G0366200ZS	DRT100	DNA damage-repair/toleration protein DRT100-like [Brassica napus]
MSTRG.5899.1	BnaA01G0366000ZS	MRD1	protein gar2-like [Brassica napus]
MSTRG.5905.1	MSTRG.5906	HSP70-4	probable mediator of RNA polymerase II transcription subunit 37c [Brassica napus]
MSTRG.5905.1	BnaA01G0366500ZS	--	BnaA01g30500D [Brassica napus]
MSTRG.5909.1	BnaA01G0366500ZS	--	BnaA01g30500D [Brassica napus]
MSTRG.5934.1	BnaA01G0368800ZS	ITN1	ankyrin repeat-containing protein ITN1-like [Brassica napus]
MSTRG.5968.1	BnaA01G0372300ZS	--	BnaAnng41820D [Brassica napus]
MSTRG.6037.1	BnaA01G0378000ZS	--	UDP-Glycosyltransferase superfamily protein [Arabidopsis thaliana]
MSTRG.6037.1	BnaA01G0378500ZS	CAT7	cationic amino acid transporter 7, chloroplastic [Brassica rapa]
MSTRG.6060.1	BnaA01G0381300ZS	FPGS2	folylpolyglutamate synthase-like [Brassica napus]
MSTRG.6068.1	BnaA01G0381900ZS	OMR1	threonine dehydratase biosynthetic, chloroplastic-like [Brassica napus]
MSTRG.6068.2	BnaA01G0381900ZS	OMR1	threonine dehydratase biosynthetic, chloroplastic-like [Brassica napus]
MSTRG.6101.1	BnaA01G0383500ZS	PCRK1	serine/threonine-protein kinase PCRK1 [Brassica rapa]
MSTRG.6100.2	BnaA01G0383500ZS	PCRK1	serine/threonine-protein kinase PCRK1 [Brassica rapa]
MSTRG.6149.1	BnaA01G0390200ZS	RWA2	protein REDUCED WALL ACETYLATION 2 isoform X1 [Brassica napus]
MSTRG.6161.1	BnaA01G0392600ZS	AGP27	classical arabinogalactan protein 27-like [Brassica napus]
MSTRG.6161.1	BnaA01G0392700ZS	EMB3004	bifunctional 3-dehydroquinate dehydratase/shikimate dehydrogenase, chloroplastic [Brassica napus]
MSTRG.6162.1	BnaA01G0392600ZS	AGP27	classical arabinogalactan protein 27-like [Brassica napus]
MSTRG.6162.1	BnaA01G0392700ZS	EMB3004	bifunctional 3-dehydroquinate dehydratase/shikimate dehydrogenase, chloroplastic [Brassica napus]
MSTRG.6219.1	BnaA01G0397800ZS	At3g05500	REF/SRPP-like protein At3g05500 [Brassica rapa]
MSTRG.6224.1	BnaA01G0398100ZS	ACBP4	PREDICTED: acyl-CoA-binding domain-containing protein 4-like isoform X1 [Brassica oleracea var. oleracea] [Brassica oleracea]
MSTRG.6224.1	MSTRG.6225	--	BnaAnng02410D [Brassica napus]
MSTRG.6276.1	BnaA01G0403200ZS	At2g05970	F-box protein At2g05970-like [Brassica napus]
MSTRG.6291.1	BnaA01G0405000ZS	--	BnaAnng32050D [Brassica napus]
MSTRG.6291.1	BnaA01G0405100ZS	D14	PREDICTED: probable strigolactone esterase D14 homolog [Brassica oleracea var. oleracea] [Brassica oleracea]
MSTRG.6295.1	BnaA01G0405400ZS	At5g51250	F-box/kelch-repeat protein At5g51250-like [Brassica napus]
MSTRG.6295.1	BnaA01G0405500ZS	CCT8	T-complex protein 1 subunit theta [Brassica napus]
MSTRG.6309.1	BnaA01G0406700ZS	P23-2	BnaC01g40480D [Brassica napus]
MSTRG.6309.1	BnaA01G0406800ZS	--	BnaC01g40490D [Brassica napus]
MSTRG.6309.1	BnaA01G0406900ZS	--	S-protein homolog 5 [Eutrema salsugineum]
MSTRG.6309.1	BnaA01G0407100ZS	LBD20	LOB domain-containing protein 20-like [Brassica napus]
MSTRG.6322.1	BnaA01G0408100ZS	BGLU25	BnaC01g40610D [Brassica napus]
MSTRG.6322.1	BnaA01G0408200ZS	CS26	probable S-sulfocysteine synthase, chloroplastic [Brassica napus]
MSTRG.6322.1	BnaA01G0408400ZS	elmoA	ELMO domain-containing protein A isoform X2 [Brassica napus]
MSTRG.6322.2	BnaA01G0408100ZS	BGLU25	BnaC01g40610D [Brassica napus]
MSTRG.6322.2	BnaA01G0408200ZS	CS26	probable S-sulfocysteine synthase, chloroplastic [Brassica napus]
MSTRG.6322.2	BnaA01G0408400ZS	elmoA	ELMO domain-containing protein A isoform X2 [Brassica napus]
MSTRG.6323.1	BnaA01G0408100ZS	BGLU25	BnaC01g40610D [Brassica napus]
MSTRG.6323.1	BnaA01G0408200ZS	CS26	probable S-sulfocysteine synthase, chloroplastic [Brassica napus]
MSTRG.6323.1	BnaA01G0408400ZS	elmoA	ELMO domain-containing protein A isoform X2 [Brassica napus]
MSTRG.6336.1	MSTRG.6334	--	BnaCnng18440D [Brassica napus]
MSTRG.6336.1	BnaA01G0409800ZS	EXPA13	PREDICTED: expansin-A13-like [Brassica oleracea var. oleracea] [Brassica oleracea]
MSTRG.6336.1	BnaA01G0409900ZS	NAC045	BnaCnng18420D [Brassica napus]
MSTRG.6336.1	BnaA01G0410000ZS	GOT1	PREDICTED: vesicle transport protein GOT1B [Brassica oleracea var. oleracea] [Brassica oleracea]
MSTRG.6337.1	MSTRG.6334	--	BnaCnng18440D [Brassica napus]
MSTRG.6337.1	BnaA01G0409800ZS	EXPA13	PREDICTED: expansin-A13-like [Brassica oleracea var. oleracea] [Brassica oleracea]
MSTRG.6337.1	BnaA01G0409900ZS	NAC045	BnaCnng18420D [Brassica napus]
MSTRG.6337.1	BnaA01G0410000ZS	GOT1	PREDICTED: vesicle transport protein GOT1B [Brassica oleracea var. oleracea] [Brassica oleracea]
MSTRG.6337.1	BnaA01G0410100ZS	--	BnaC04g49880D [Brassica napus]
MSTRG.6340.1	MSTRG.6335	--	BnaCnng18440D [Brassica napus]
MSTRG.6340.1	BnaA01G0409800ZS	EXPA13	PREDICTED: expansin-A13-like [Brassica oleracea var. oleracea] [Brassica oleracea]
MSTRG.6340.1	BnaA01G0409900ZS	NAC045	BnaCnng18420D [Brassica napus]
MSTRG.6340.1	BnaA01G0410100ZS	--	BnaC04g49880D [Brassica napus]
MSTRG.6340.1	BnaA01G0410300ZS	--	PREDICTED: nucleolin [Brassica oleracea var. oleracea] [Brassica oleracea]
MSTRG.6340.1	BnaA01G0410200ZS	At1g51745	BnaC04g49890D [Brassica napus]
MSTRG.6345.1	BnaA01G0410600ZS	XPO1B	protein EXPORTIN 1B [Brassica napus]
MSTRG.6345.1	BnaA01G0410800ZS	At3g03090	D-xylose-proton symporter-like 1 [Brassica napus]
MSTRG.6345.1	BnaA01G0411000ZS	atad3-b	PREDICTED: ATPase family AAA domain-containing protein 3 [Brassica oleracea var. oleracea] [Brassica oleracea]
MSTRG.6345.1	BnaA01G0411100ZS	CSLD3	cellulose synthase-like protein D3 [Brassica rapa]
MSTRG.6345.1	BnaA01G0410900ZS	At3g03070	PREDICTED: NADH dehydrogenase [ubiquinone] iron-sulfur protein 6, mitochondrial [Brassica oleracea var. oleracea] [Brassica oleracea]
MSTRG.6356.1	BnaA01G0411700ZS	At3g02930	WEB family protein At3g02930, chloroplastic-like isoform X3 [Brassica napus]
MSTRG.6356.1	BnaA01G0411800ZS	RPA2B	replication protein A 32 kDa subunit B [Brassica napus]
MSTRG.6356.1	BnaA01G0411900ZS	At3g02910	BnaAnng15300D [Brassica napus]
MSTRG.6357.1	BnaA01G0411700ZS	At3g02930	WEB family protein At3g02930, chloroplastic-like isoform X3 [Brassica napus]
MSTRG.6357.1	BnaA01G0411800ZS	RPA2B	replication protein A 32 kDa subunit B [Brassica napus]
MSTRG.6357.1	BnaA01G0411900ZS	At3g02910	BnaAnng15300D [Brassica napus]
MSTRG.6369.1	BnaA01G0413000ZS	PPC6-1	PREDICTED: probable protein phosphatase 2C 33 [Brassica oleracea var. oleracea] [Brassica oleracea]
MSTRG.6375.1	BnaA01G0413000ZS	PPC6-1	PREDICTED: probable protein phosphatase 2C 33 [Brassica oleracea var. oleracea] [Brassica oleracea]
MSTRG.6375.1	BnaA01G0413200ZS	TRXF	PREDICTED: thioredoxin F-type, chloroplastic [Brassica oleracea var. oleracea] [Brassica oleracea]
MSTRG.6375.1	BnaA01G0413400ZS	--	BnaAnng12650D [Brassica napus]
MSTRG.6375.1	BnaA01G0413500ZS	At3g02690	PREDICTED: WAT1-related protein At3g02690, chloroplastic [Brassica oleracea var. oleracea] [Brassica oleracea]
MSTRG.6375.1	BnaA01G0413600ZS	EMB2768	PREDICTED: tyrosine--tRNA ligase, chloroplastic/mitochondrial [Brassica oleracea var. oleracea] [Brassica oleracea]
MSTRG.6375.1	BnaA01G0413100ZS	At1g65240	PREDICTED: aspartic proteinase-like protein 2 isoform X1 [Brassica oleracea var. oleracea] [Brassica oleracea]
MSTRG.6377.1	BnaA01G0413000ZS	PPC6-1	PREDICTED: probable protein phosphatase 2C 33 [Brassica oleracea var. oleracea] [Brassica oleracea]
MSTRG.6377.1	BnaA01G0413200ZS	TRXF	PREDICTED: thioredoxin F-type, chloroplastic [Brassica oleracea var. oleracea] [Brassica oleracea]
MSTRG.6377.1	BnaA01G0413300ZS	Ctnnbl1	beta-catenin-like protein 1 [Brassica napus]
MSTRG.6377.1	BnaA01G0413500ZS	At3g02690	PREDICTED: WAT1-related protein At3g02690, chloroplastic [Brassica oleracea var. oleracea] [Brassica oleracea]
MSTRG.6377.1	BnaA01G0413600ZS	EMB2768	PREDICTED: tyrosine--tRNA ligase, chloroplastic/mitochondrial [Brassica oleracea var. oleracea] [Brassica oleracea]
MSTRG.6377.1	BnaA01G0413100ZS	At1g65240	PREDICTED: aspartic proteinase-like protein 2 isoform X1 [Brassica oleracea var. oleracea] [Brassica oleracea]
MSTRG.6380.3	BnaA01G0413200ZS	TRXF	PREDICTED: thioredoxin F-type, chloroplastic [Brassica oleracea var. oleracea] [Brassica oleracea]
MSTRG.6380.3	BnaA01G0413300ZS	Ctnnbl1	beta-catenin-like protein 1 [Brassica napus]
MSTRG.6380.3	BnaA01G0413400ZS	--	BnaAnng12650D [Brassica napus]
MSTRG.6380.3	BnaA01G0413500ZS	At3g02690	PREDICTED: WAT1-related protein At3g02690, chloroplastic [Brassica oleracea var. oleracea] [Brassica oleracea]
MSTRG.6380.3	BnaA01G0413900ZS	At3g02650	pentatricopeptide repeat-containing protein At3g02650, mitochondrial-like [Brassica napus]
MSTRG.6380.3	BnaA01G0413100ZS	At1g65240	PREDICTED: aspartic proteinase-like protein 2 isoform X1 [Brassica oleracea var. oleracea] [Brassica oleracea]
MSTRG.6385.4	BnaA01G0414300ZS	STE1	PREDICTED: delta(7)-sterol-C5(6)-desaturase 1-like [Brassica oleracea var. oleracea] [Brassica oleracea]
MSTRG.6385.4	BnaA01G0414500ZS	PMI1	PREDICTED: mannose-6-phosphate isomerase 1-like [Brassica oleracea var. oleracea] [Brassica oleracea]
MSTRG.6385.4	BnaA01G0414600ZS	RPS7	PREDICTED: 40S ribosomal protein S7 [Brassica oleracea var. oleracea] [Brassica oleracea]
MSTRG.6385.4	BnaA01G0414700ZS	--	BnaA01g32890D [Brassica napus]
MSTRG.6385.4	BnaA01G0414800ZS	LBD41	LOB domain-containing protein 41-like [Brassica napus]
MSTRG.6427.1	BnaA01G0419800ZS	SNL1	paired amphipathic helix protein Sin3-like 1 isoform X2 [Brassica napus]
MSTRG.6427.1	BnaA01G0419400ZS	VIP1	PREDICTED: inositol hexakisphosphate and diphosphoinositol-pentakisphosphate kinase-like isoform X1 [Brassica oleracea var. oleracea] [Brassica oleracea]
MSTRG.6446.2	BnaA01G0421600ZS	POT4	PREDICTED: potassium transporter 4 [Brassica oleracea var. oleracea] [Brassica oleracea]
MSTRG.6446.2	BnaA01G0421700ZS	At3g19330	BnaCnng05500D [Brassica napus]
MSTRG.6446.2	BnaA01G0421800ZS	GDPD1	PREDICTED: glycerophosphodiester phosphodiesterase GDPD1, chloroplastic [Brassica oleracea var. oleracea] [Brassica oleracea]
MSTRG.6446.2	BnaA01G0421500ZS	At3g02060	ATP-dependent DNA helicase At3g02060, chloroplastic [Brassica napus]
MSTRG.6486.1	BnaA01G0425700ZS	rps7-A	ribosomal protein S7 [Pericampylus glaucus]
MSTRG.6486.2	BnaA01G0425700ZS	rps7-A	ribosomal protein S7 [Pericampylus glaucus]
MSTRG.6486.2	BnaA01G0425400ZS	matK	matK gene product [Brassica napus]
MSTRG.6509.2	BnaA01G0427600ZS	OBE1	BnaC01g39680D [Brassica napus]
MSTRG.6509.2	BnaA01G0427700ZS	HSP90-6	heat shock protein 90-6, mitochondrial isoform X2 [Brassica napus]
MSTRG.6509.2	BnaA01G0427900ZS	EXOSC7	exosome complex component RRP42 [Brassica napus]
MSTRG.6509.2	BnaA01G0428100ZS	At3g07680	transmembrane emp24 domain-containing protein p24beta2-like [Brassica napus]
MSTRG.6535.1	BnaA02G0001200ZS	--	BnaC01g31760D [Brassica napus]
MSTRG.6535.1	BnaA02G0001300ZS	--	BnaC02g44280D [Brassica napus]
MSTRG.6535.1	BnaA02G0001400ZS	PME54	probable pectinesterase/pectinesterase inhibitor 54 isoform X2 [Brassica napus]
MSTRG.6539.2	BnaA02G0001200ZS	--	BnaC01g31760D [Brassica napus]
MSTRG.6539.2	BnaA02G0001300ZS	--	BnaC02g44280D [Brassica napus]
MSTRG.6539.2	BnaA02G0001400ZS	PME54	probable pectinesterase/pectinesterase inhibitor 54 isoform X2 [Brassica napus]
MSTRG.6539.2	BnaA02G0001700ZS	BRH1	probable E3 ubiquitin-protein ligase RHA1A [Brassica rapa]
MSTRG.6539.2	BnaA02G0001800ZS	CCT2	BnaA02g05110D [Brassica napus]
MSTRG.6539.3	BnaA02G0001200ZS	--	BnaC01g31760D [Brassica napus]
MSTRG.6539.3	BnaA02G0001300ZS	--	BnaC02g44280D [Brassica napus]
MSTRG.6539.3	BnaA02G0001400ZS	PME54	probable pectinesterase/pectinesterase inhibitor 54 isoform X2 [Brassica napus]
MSTRG.6539.3	BnaA02G0001700ZS	BRH1	probable E3 ubiquitin-protein ligase RHA1A [Brassica rapa]
MSTRG.6539.3	BnaA02G0001800ZS	CCT2	BnaA02g05110D [Brassica napus]
MSTRG.6548.1	BnaA02G0002100ZS	FLZ14	FCS-Like Zinc finger 14 isoform X1 [Brassica rapa]
MSTRG.6549.2	BnaA02G0002100ZS	FLZ14	FCS-Like Zinc finger 14 isoform X1 [Brassica rapa]
MSTRG.6549.2	BnaA02G0002500ZS	ARF7	auxin response factor 7-like [Brassica napus]
MSTRG.6580.2	BnaA02G0005400ZS	PDC4	pyruvate decarboxylase 4 isoform X2 [Brassica rapa]
MSTRG.6605.1	BnaA02G0008400ZS	--	BnaCnng28770D [Brassica napus]
MSTRG.6605.1	BnaA02G0008600ZS	NAKR1	protein SODIUM POTASSIUM ROOT DEFECTIVE 1 [Brassica napus]
MSTRG.6605.1	MSTRG.6609	RPL35D	BnaCnng28740D [Brassica napus]
MSTRG.6605.1	BnaA02G0008700ZS	SGR9	E3 ubiquitin-protein ligase SGR9, amyloplastic-like [Brassica napus]
MSTRG.6607.1	BnaA02G0008600ZS	NAKR1	protein SODIUM POTASSIUM ROOT DEFECTIVE 1 [Brassica napus]
MSTRG.6607.1	MSTRG.6609	RPL35D	BnaCnng28740D [Brassica napus]
MSTRG.6607.1	BnaA02G0008700ZS	SGR9	E3 ubiquitin-protein ligase SGR9, amyloplastic-like [Brassica napus]
MSTRG.6645.1	BnaA02G0012400ZS	HIPP06	heavy metal-associated isoprenylated plant protein 6-like isoform X1 [Brassica napus]
MSTRG.6645.1	BnaA02G0012900ZS	ZAT5	zinc finger protein ZAT5-like [Brassica napus]
MSTRG.6645.1	BnaA02G0013000ZS	RABC2A	ras-related protein RABC2a-like [Brassica napus]
MSTRG.6651.1	BnaA02G0012900ZS	ZAT5	zinc finger protein ZAT5-like [Brassica napus]
MSTRG.6651.1	BnaA02G0013000ZS	RABC2A	ras-related protein RABC2a-like [Brassica napus]
MSTRG.6651.1	BnaA02G0013300ZS	At5g03610	GDSL esterase/lipase At5g03610-like [Brassica napus]
MSTRG.6652.1	BnaA02G0012900ZS	ZAT5	zinc finger protein ZAT5-like [Brassica napus]
MSTRG.6652.1	BnaA02G0013000ZS	RABC2A	ras-related protein RABC2a-like [Brassica napus]
MSTRG.6652.1	BnaA02G0013300ZS	At5g03610	GDSL esterase/lipase At5g03610-like [Brassica napus]
MSTRG.6662.1	BnaA02G0014000ZS	At5g03820	GDSL esterase/lipase At5g03820-like [Brassica napus]
MSTRG.6662.1	BnaA02G0014100ZS	TFL1	protein TERMINAL FLOWER 1-like [Brassica napus]
MSTRG.6662.1	BnaA02G0014300ZS	MLS	malate synthase, glyoxysomal [Brassica napus]
MSTRG.6662.1	BnaA02G0014400ZS	At3g28850	glutaredoxin family protein [Arabidopsis lyrata subsp. lyrata] [Arabidopsis lyrata]
MSTRG.6662.1	BnaA02G0014500ZS	At5g03900	BnaC02g02850D [Brassica napus]
MSTRG.6662.1	BnaA02G0013900ZS	EMB175	pentatricopeptide repeat-containing protein At5g03800 [Brassica napus]
MSTRG.6663.1	BnaA02G0014000ZS	At5g03820	GDSL esterase/lipase At5g03820-like [Brassica napus]
MSTRG.6663.1	BnaA02G0014100ZS	TFL1	protein TERMINAL FLOWER 1-like [Brassica napus]
MSTRG.6663.1	BnaA02G0014300ZS	MLS	malate synthase, glyoxysomal [Brassica napus]
MSTRG.6663.1	BnaA02G0014400ZS	At3g28850	glutaredoxin family protein [Arabidopsis lyrata subsp. lyrata] [Arabidopsis lyrata]
MSTRG.6663.1	BnaA02G0014500ZS	At5g03900	BnaC02g02850D [Brassica napus]
MSTRG.6663.1	BnaA02G0013900ZS	EMB175	pentatricopeptide repeat-containing protein At5g03800 [Brassica napus]
MSTRG.6662.3	BnaA02G0014000ZS	At5g03820	GDSL esterase/lipase At5g03820-like [Brassica napus]
MSTRG.6662.3	BnaA02G0014100ZS	TFL1	protein TERMINAL FLOWER 1-like [Brassica napus]
MSTRG.6662.3	BnaA02G0014300ZS	MLS	malate synthase, glyoxysomal [Brassica napus]
MSTRG.6662.3	BnaA02G0014400ZS	At3g28850	glutaredoxin family protein [Arabidopsis lyrata subsp. lyrata] [Arabidopsis lyrata]
MSTRG.6662.3	BnaA02G0014500ZS	At5g03900	BnaC02g02850D [Brassica napus]
MSTRG.6662.3	BnaA02G0013900ZS	EMB175	pentatricopeptide repeat-containing protein At5g03800 [Brassica napus]
MSTRG.6675.1	MSTRG.6671	--	BnaC02g02800D [Brassica napus]
MSTRG.6675.1	MSTRG.6672	--	BnaC02g02800D [Brassica napus]
MSTRG.6675.1	BnaA02G0014900ZS	SDP1	triacylglycerol lipase SDP1 [Brassica rapa]
MSTRG.6688.1	BnaA02G0016500ZS	KCS19	3-ketoacyl-CoA synthase 19 [Brassica rapa]
MSTRG.6688.1	BnaA02G0016900ZS	--	BnaC02g02630D [Brassica napus]
MSTRG.6688.1	BnaA02G0016800ZS	SPCC1827.05c	uncharacterized RNA-binding protein C1827.05c-like [Brassica napus]
MSTRG.6704.1	BnaA02G0017800ZS	At5g05010	coatomer subunit delta-like [Brassica napus]
MSTRG.6704.1	BnaA02G0017900ZS	--	PREDICTED: probable cysteine proteinase At3g43960 [Brassica oleracea var. oleracea] [Brassica oleracea]
MSTRG.6704.1	BnaA02G0018400ZS	CYP708A2	PREDICTED: cytochrome P450 708A2-like [Raphanus sativus]
MSTRG.6705.3	BnaA02G0017800ZS	At5g05010	coatomer subunit delta-like [Brassica napus]
MSTRG.6705.3	BnaA02G0017900ZS	--	PREDICTED: probable cysteine proteinase At3g43960 [Brassica oleracea var. oleracea] [Brassica oleracea]
MSTRG.6705.3	BnaA02G0018200ZS	--	Cystatin/monellin superfamily protein [Arabidopsis thaliana]
MSTRG.6705.3	BnaA02G0018400ZS	CYP708A2	PREDICTED: cytochrome P450 708A2-like [Raphanus sativus]
MSTRG.6705.3	BnaA02G0018600ZS	CESA3	cellulose synthase A catalytic subunit 3 [Brassica napus]
MSTRG.6720.1	BnaA02G0020200ZS	FAD8	temperature-sensitive sn-2 acyl-lipid omega-3 desaturase (ferredoxin), chloroplastic [Brassica napus]
MSTRG.6720.1	BnaA02G0019900ZS	APC1	anaphase-promoting complex subunit 1-like [Brassica napus]
MSTRG.6720.1	BnaA02G0020100ZS	--	BnaC02g02250D [Brassica napus]
MSTRG.6745.1	MSTRG.6744	SPH27	S-protein homolog 27 [Brassica rapa]
MSTRG.6745.1	BnaA02G0022300ZS	nsa2	ribosome biogenesis protein NSA2 homolog [Brassica napus]
MSTRG.6750.1	BnaA02G0022700ZS	ABCG22	ABC transporter G family member 22-like [Brassica napus]
MSTRG.6805.1	BnaA02G0027500ZS	At5g07960	PREDICTED: protein Asterix [Brassica oleracea var. oleracea] [Brassica oleracea]
MSTRG.6811.1	BnaA02G0028100ZS	At5g08180	H/ACA ribonucleoprotein complex subunit 2-like protein [Brassica rapa]
MSTRG.6811.1	BnaA02G0028400ZS	HEMC	porphobilinogen deaminase, chloroplastic-like [Brassica napus]
MSTRG.6817.1	BnaA02G0028400ZS	HEMC	porphobilinogen deaminase, chloroplastic-like [Brassica napus]
MSTRG.6817.1	BnaA02G0028500ZS	At5g08300	succinate--CoA ligase [ADP-forming] subunit alpha-1, mitochondrial [Brassica rapa]
MSTRG.6817.1	BnaA02G0028900ZS	Eapp	E2F-associated phosphoprotein-like [Brassica napus]
MSTRG.6817.1	BnaA02G0029000ZS	TCP21	transcription factor TCP21-like [Brassica napus]
MSTRG.6817.3	BnaA02G0028400ZS	HEMC	porphobilinogen deaminase, chloroplastic-like [Brassica napus]
MSTRG.6817.3	BnaA02G0028500ZS	At5g08300	succinate--CoA ligase [ADP-forming] subunit alpha-1, mitochondrial [Brassica rapa]
MSTRG.6817.3	BnaA02G0028900ZS	Eapp	E2F-associated phosphoprotein-like [Brassica napus]
MSTRG.6817.3	BnaA02G0029000ZS	TCP21	transcription factor TCP21-like [Brassica napus]
MSTRG.6817.3	BnaA02G0029200ZS	AGAL1	alpha-galactosidase 1-like [Brassica napus]
MSTRG.6830.1	BnaA02G0029300ZS	--	BnaAnng06110D [Brassica napus]
MSTRG.6830.1	BnaA02G0029400ZS	LIP1P	lipoyl synthase, chloroplastic-like [Brassica napus]
MSTRG.6830.1	BnaA02G0029700ZS	SRM1	transcription factor SRM1-like [Brassica napus]
MSTRG.6830.1	BnaA02G0029900ZS	TPR4	topless-related protein 4 isoform X1 [Brassica rapa]
MSTRG.6848.1	BnaA02G0031100ZS	--	BnaAnng05910D [Brassica napus]
MSTRG.6848.1	BnaA02G0031200ZS	NAC082	NAC domain-containing protein 82-like [Brassica napus]
MSTRG.6848.1	BnaA02G0031300ZS	--	non-specific lipid-transfer protein-like protein At5g64080 [Brassica rapa]
MSTRG.6848.1	BnaA02G0030700ZS	NAC081	protein ATAF2 [Brassica rapa]
MSTRG.6856.1	BnaA02G0031500ZS	abhd-5.1	2-hydroxy-6-oxo-2,4-heptadienoate hydrolase [Brassica rapa]
MSTRG.6856.1	BnaA02G0031700ZS	EXL4	protein EXORDIUM-like 4 [Brassica napus]
MSTRG.6856.1	BnaA02G0031800ZS	--	classical arabinogalactan protein 1-like [Brassica napus]
MSTRG.6856.1	BnaA02G0031900ZS	At5g09450	pentatricopeptide repeat-containing protein At5g09450, mitochondrial [Brassica napus]
MSTRG.6925.1	BnaA02G0036800ZS	HBS1L	elongation factor 1-alpha 2 isoform X1 [Brassica napus]
MSTRG.6942.1	MSTRG.6944	PL1	protein POLAR LOCALIZATION DURING ASYMMETRIC DIVISION AND REDISTRIBUTION [Brassica napus]
MSTRG.6942.1	BnaA02G0038000ZS	At5g10900	serine/threonine-protein phosphatase 7 inactive homolog [Brassica napus]
MSTRG.6946.1	MSTRG.6944	PL1	protein POLAR LOCALIZATION DURING ASYMMETRIC DIVISION AND REDISTRIBUTION [Brassica napus]
MSTRG.6946.1	BnaA02G0038000ZS	At5g10900	serine/threonine-protein phosphatase 7 inactive homolog [Brassica napus]
MSTRG.6947.1	BnaA02G0038000ZS	At5g10900	serine/threonine-protein phosphatase 7 inactive homolog [Brassica napus]
MSTRG.6950.1	BnaA02G0038400ZS	--	BnaCnng20090D [Brassica napus]
MSTRG.6972.1	BnaA02G0040500ZS	EMF1	protein EMBRYONIC FLOWER 1-like [Brassica napus]
MSTRG.6977.1	BnaA02G0041200ZS	--	BnaAnng32230D, partial [Brassica napus]
MSTRG.6985.1	BnaA02G0041600ZS	EPSIN1	clathrin interactor EPSIN 1-like [Brassica napus]
MSTRG.6985.1	BnaA02G0041800ZS	--	BnaA02g34980D [Brassica napus]
MSTRG.6985.1	BnaA02G0041900ZS	At4g17560	50S ribosomal protein L19-1, chloroplastic-like [Brassica napus]
MSTRG.6985.1	BnaA02G0041500ZS	NADP-ME2	NADP-dependent malic enzyme 2 [Brassica rapa]
MSTRG.6986.1	BnaA02G0041600ZS	EPSIN1	clathrin interactor EPSIN 1-like [Brassica napus]
MSTRG.6986.1	BnaA02G0041800ZS	--	BnaA02g34980D [Brassica napus]
MSTRG.6986.1	BnaA02G0041900ZS	At4g17560	50S ribosomal protein L19-1, chloroplastic-like [Brassica napus]
MSTRG.6986.1	BnaA02G0042000ZS	At5g11770	NADH dehydrogenase [ubiquinone] iron-sulfur protein 7, mitochondrial-like [Brassica napus]
MSTRG.6986.1	BnaA02G0041500ZS	NADP-ME2	NADP-dependent malic enzyme 2 [Brassica rapa]
MSTRG.6986.2	BnaA02G0041600ZS	EPSIN1	clathrin interactor EPSIN 1-like [Brassica napus]
MSTRG.6986.2	BnaA02G0041800ZS	--	BnaA02g34980D [Brassica napus]
MSTRG.6986.2	BnaA02G0041900ZS	At4g17560	50S ribosomal protein L19-1, chloroplastic-like [Brassica napus]
MSTRG.6986.2	BnaA02G0042000ZS	At5g11770	NADH dehydrogenase [ubiquinone] iron-sulfur protein 7, mitochondrial-like [Brassica napus]
MSTRG.6987.1	BnaA02G0041600ZS	EPSIN1	clathrin interactor EPSIN 1-like [Brassica napus]
MSTRG.6987.1	BnaA02G0042000ZS	At5g11770	NADH dehydrogenase [ubiquinone] iron-sulfur protein 7, mitochondrial-like [Brassica napus]
MSTRG.6987.1	BnaA02G0042100ZS	NDL2	PREDICTED: pollen-specific protein SF21 isoform X2 [Camelina sativa]
MSTRG.7012.1	BnaA02G0043500ZS	At5g12050	protein BIG GRAIN 1-like D [Brassica rapa]
MSTRG.7012.1	MSTRG.7010	MSL10	mechanosensitive ion channel protein 10-like [Brassica napus]
MSTRG.7012.1	MSTRG.7011	MSL10	mechanosensitive ion channel protein 10 [Brassica rapa]
MSTRG.7012.1	BnaA02G0043700ZS	TERC	thylakoid membrane protein TERC, chloroplastic-like isoform X2 [Brassica napus]
MSTRG.7012.1	BnaA02G0043900ZS	CLT3	protein CLT3, chloroplastic-like [Brassica napus]
MSTRG.7013.1	MSTRG.7010	MSL10	mechanosensitive ion channel protein 10-like [Brassica napus]
MSTRG.7013.1	MSTRG.7011	MSL10	mechanosensitive ion channel protein 10 [Brassica rapa]
MSTRG.7013.1	BnaA02G0043700ZS	TERC	thylakoid membrane protein TERC, chloroplastic-like isoform X2 [Brassica napus]
MSTRG.7013.1	BnaA02G0044000ZS	CPK17	calcium-dependent protein kinase 17 [Brassica rapa]
MSTRG.7013.1	BnaA02G0043900ZS	CLT3	protein CLT3, chloroplastic-like [Brassica napus]
MSTRG.7129.1	BnaA02G0054200ZS	NRT2.7	high affinity nitrate transporter 2.7-like [Brassica napus]
MSTRG.7129.1	MSTRG.7125	At4g17700	BnaAnng28850D [Brassica napus]
MSTRG.7137.1	BnaA02G0054900ZS	SNL6	cinnamoyl-CoA reductase-like SNL6 isoform X1 [Brassica rapa]
MSTRG.7137.1	BnaA02G0055100ZS	fray2	serine/threonine-protein kinase BLUS1-like [Brassica napus]
MSTRG.7142.1	BnaA02G0055300ZS	BCA2	beta carbonic anhydrase 2, chloroplastic [Brassica napus]
MSTRG.7142.1	BnaA02G0055600ZS	--	ARM repeat superfamily protein [Arabidopsis thaliana]
MSTRG.7142.1	BnaA02G0055700ZS	PIGB	GPI mannosyltransferase 3-like [Brassica napus]
MSTRG.7170.1	BnaA02G0058100ZS	PER56	peroxidase 56 [Brassica rapa]
MSTRG.7170.1	BnaA02G0058300ZS	RPS9B	40S ribosomal protein S9-1 [Brassica rapa]
MSTRG.7170.1	BnaA02G0058600ZS	AVT1J	amino acid transporter AVT1J-like [Brassica napus]
MSTRG.7170.1	BnaA02G0058700ZS	At5g15280	pentatricopeptide repeat-containing protein At5g15280, mitochondrial-like [Brassica napus]
MSTRG.7171.1	BnaA02G0058100ZS	PER56	peroxidase 56 [Brassica rapa]
MSTRG.7171.1	BnaA02G0058300ZS	RPS9B	40S ribosomal protein S9-1 [Brassica rapa]
MSTRG.7171.1	BnaA02G0058600ZS	AVT1J	amino acid transporter AVT1J-like [Brassica napus]
MSTRG.7171.1	BnaA02G0058700ZS	At5g15280	pentatricopeptide repeat-containing protein At5g15280, mitochondrial-like [Brassica napus]
MSTRG.7239.2	BnaA02G0064200ZS	SEI1	seipin-1-like [Brassica napus]
MSTRG.7239.2	BnaA02G0064300ZS	MBS2	protein METHYLENE BLUE SENSITIVITY 2 isoform X2 [Brassica rapa]
MSTRG.7239.2	BnaA02G0064800ZS	--	voltage-dependent L-type calcium channel subunit [Arabidopsis thaliana]
MSTRG.7239.2	BnaA02G0064900ZS	KAN1	transcription repressor KAN1 isoform X1 [Brassica napus]
MSTRG.7241.1	BnaA02G0064300ZS	MBS2	protein METHYLENE BLUE SENSITIVITY 2 isoform X2 [Brassica rapa]
MSTRG.7241.1	BnaA02G0064900ZS	KAN1	transcription repressor KAN1 isoform X1 [Brassica napus]
MSTRG.7245.1	BnaA02G0065000ZS	GLN1-4	glutamine synthetase cytosolic isozyme 1-4-like [Brassica napus]
MSTRG.7245.1	BnaA02G0065200ZS	ABCF1	ABC transporter F family member 1 [Brassica rapa]
MSTRG.7245.1	BnaA02G0065100ZS	At5g16590	probable inactive receptor kinase At5g16590 [Brassica rapa]
MSTRG.7275.4	BnaA02G0067500ZS	XPO1	protein EXPORTIN 1A [Brassica napus]
MSTRG.7275.4	BnaA02G0067600ZS	UGT78D2	flavonol 3-O-glucosyltransferase isoform X2 [Brassica rapa]
MSTRG.7275.4	BnaA02G0067700ZS	--	serine/threonine-protein phosphatase 4 regulatory subunit 2-like isoform X1 [Brassica napus]
MSTRG.7276.1	BnaA02G0067500ZS	XPO1	protein EXPORTIN 1A [Brassica napus]
MSTRG.7276.1	BnaA02G0067600ZS	UGT78D2	flavonol 3-O-glucosyltransferase isoform X2 [Brassica rapa]
MSTRG.7276.1	BnaA02G0067700ZS	--	serine/threonine-protein phosphatase 4 regulatory subunit 2-like isoform X1 [Brassica napus]
MSTRG.7279.1	BnaA02G0067800ZS	--	cyclic nucleotide-gated cation channel beta-1 isoform X2 [Brassica napus]
MSTRG.7279.1	BnaA02G0067900ZS	--	rubredoxin family protein [Arabidopsis lyrata subsp. lyrata] [Arabidopsis lyrata]
MSTRG.7279.1	MSTRG.7275	--	BnaC05g28680D [Brassica napus]
MSTRG.7293.1	BnaA02G0068700ZS	CYCA1-1	cyclin-A1-1 [Brassica napus]
MSTRG.7293.1	BnaA02G0068800ZS	SDG40	protein SET DOMAIN GROUP 40-like [Brassica napus]
MSTRG.7293.1	BnaA02G0068900ZS	--	UPF0651 protein YPL107W, mitochondrial [Brassica napus]
MSTRG.7293.1	BnaA02G0069000ZS	ATG5	autophagy protein 5 [Brassica napus]
MSTRG.7293.1	BnaA02G0069100ZS	RVE1	protein REVEILLE 1 [Brassica napus]
MSTRG.7293.1	BnaA02G0069200ZS	HDG10	homeobox-leucine zipper protein HDG9 [Brassica rapa]
MSTRG.7305.1	BnaA02G0069900ZS	usp106	BnaC02g44170D [Brassica napus]
MSTRG.7305.1	BnaA02G0070300ZS	MEX1	maltose excess protein 1, chloroplastic [Brassica napus]
MSTRG.7305.1	BnaA02G0070400ZS	xanA	phosphomannomutase/phosphoglucomutase isoform X1 [Brassica rapa]
MSTRG.7354.1	BnaA02G0074100ZS	DREB2G	dehydration-responsive element-binding protein 2G-like [Brassica napus]
MSTRG.7354.1	MSTRG.7351	--	disease resistance protein [Brassica rapa subsp. pekinensis] [Brassica rapa]
MSTRG.7354.1	BnaA02G0074200ZS	--	carboxyl-terminal peptidase (DUF239) [Arabidopsis thaliana]
MSTRG.7354.1	BnaA02G0074400ZS	At5g18475	pentatricopeptide repeat-containing protein At5g18475 [Brassica napus]
MSTRG.7354.1	BnaA02G0074500ZS	IPUT1	inositol phosphorylceramide glucuronosyltransferase 1-like [Brassica napus]
MSTRG.7354.1	BnaA02G0074600ZS	At5g18500	probable receptor-like protein kinase At5g18500 [Brassica napus]
MSTRG.7362.1	BnaA02G0074900ZS	At5g18550	zinc finger CCCH domain-containing protein 58 [Brassica napus]
MSTRG.7362.1	BnaA02G0075100ZS	OBGL	GTP-binding protein OBGC, chloroplastic [Brassica napus]
MSTRG.7362.1	BnaA02G0075200ZS	TON2	probable serine/threonine-protein phosphatase 2A regulatory subunit B'' subunit TON2 [Brassica rapa]
MSTRG.7381.1	BnaA02G0077200ZS	GIP2	basic 7S globulin [Brassica napus]
MSTRG.7395.1	BnaA02G0077900ZS	RH58	BnaAnng08750D [Brassica napus]
MSTRG.7395.1	BnaA02G0078000ZS	ADG2	glucose-1-phosphate adenylyltransferase large subunit 1, chloroplastic [Brassica napus]
MSTRG.7395.1	BnaA02G0078200ZS	At5g19250	uncharacterized GPI-anchored protein At5g19250-like [Brassica napus]
MSTRG.7411.1	BnaA02G0079900ZS	At5g19510	elongation factor 1-beta 2 [Brassica napus]
MSTRG.7411.1	BnaA02G0079700ZS	eif2b3	BnaA02g04240D [Brassica napus]
MSTRG.7411.1	BnaA02G0080000ZS	ACL5	thermospermine synthase ACAULIS5 [Brassica rapa]
MSTRG.7417.1	BnaA02G0080100ZS	--	thermosome subunit gamma [Arabidopsis thaliana]
MSTRG.7417.1	BnaA02G0080200ZS	ASP2	aspartate aminotransferase, cytoplasmic isozyme 1 [Brassica napus]
MSTRG.7417.1	BnaA02G0080400ZS	--	transmembrane protein 234 homolog [Brassica napus]
MSTRG.7438.1	BnaA02G0082100ZS	Ipo5	importin-5-like [Brassica napus]
MSTRG.7456.1	BnaA02G0083800ZS	--	testis- and ovary-specific PAZ domain protein [Arabidopsis thaliana]
MSTRG.7456.1	BnaA02G0083900ZS	--	ATP-dependent RNA helicase p62-like [Brassica napus]
MSTRG.7456.1	BnaA02G0083300ZS	IPT9	tRNA dimethylallyltransferase 9 [Brassica napus]
MSTRG.7456.1	BnaA02G0083700ZS	dlcB	Dynein light chain type 1 family protein [Arabidopsis thaliana]
MSTRG.7505.1	BnaA02G0087900ZS	SRL2	protein SEMI-ROLLED LEAF 2 [Brassica rapa]
MSTRG.7505.1	BnaA02G0088000ZS	LRR1	leucine-rich repeat protein 1 [Brassica rapa]
MSTRG.7505.1	BnaA02G0088200ZS	--	BnaAnng27890D [Brassica napus]
MSTRG.7528.2	BnaA02G0089700ZS	ATJ3	chaperone protein dnaJ 3 [Brassica rapa]
MSTRG.7528.2	BnaA02G0089900ZS	At5g22090	protein FAF-like, chloroplastic [Brassica napus]
MSTRG.7531.4	BnaA02G0090200ZS	PIGM	GPI mannosyltransferase 1-like isoform X1 [Brassica napus]
MSTRG.7536.1	BnaA02G0090700ZS	CAF1-11	probable CCR4-associated factor 1 homolog 11 [Brassica napus]
MSTRG.7536.1	BnaA02G0091000ZS	NAC089	BnaA02g05540D [Brassica napus]
MSTRG.7536.1	BnaA02G0091200ZS	NIT4	bifunctional nitrilase/nitrile hydratase NIT4-like [Brassica napus]
MSTRG.7555.1	BnaA02G0093000ZS	At5g44490	BnaA02g05760D [Brassica napus]
MSTRG.7555.1	BnaA02G0093100ZS	At5g22620	probable 2-carboxy-D-arabinitol-1-phosphatase isoform X2 [Brassica napus]
MSTRG.7588.1	BnaA02G0097000ZS	WAV3	E3 ubiquitin-protein ligase WAV3 [Brassica rapa]
MSTRG.7603.1	BnaA02G0098100ZS	PDX2	BnaA02g06220D [Brassica napus]
MSTRG.7603.1	BnaA02G0098300ZS	PDX2	probable pyridoxal 5'-phosphate synthase subunit PDX2 [Brassica napus]
MSTRG.7612.1	BnaA02G0098900ZS	SIZ1	E3 SUMO-protein ligase SIZ1-like isoform X1 [Brassica napus]
MSTRG.7637.1	BnaA02G0101900ZS	RPS15A	ras-related protein RABE1c-like protein [Carex littledalei]
MSTRG.7637.1	BnaA02G0101500ZS	ADF4	BnaA02g06680D [Brassica napus]
MSTRG.7641.1	BnaA02G0101700ZS	At5g59870	probable histone H2A.7 [Brassica rapa]
MSTRG.7641.1	BnaA02G0101900ZS	RPS15A	ras-related protein RABE1c-like protein [Carex littledalei]
MSTRG.7641.1	BnaA02G0102400ZS	UFC	protein UPSTREAM OF FLC-like [Brassica napus]
MSTRG.7666.1	MSTRG.7663	--	BnaC06g14090D [Brassica napus]
MSTRG.7666.1	BnaA02G0105500ZS	MBD6	methyl-CpG-binding domain-containing protein 6-like [Brassica napus]
MSTRG.7666.1	BnaA02G0105200ZS	--	suppressor of disruption of TFIIS isoform X1 [Brassica napus]
MSTRG.7689.1	BnaA02G0107100ZS	NRPB7	DNA-directed RNA polymerase II subunit 7 [Brassica rapa]
MSTRG.7717.1	BnaA02G0109900ZS	At5g39865	BnaA02g07580D [Brassica napus]
MSTRG.7717.1	BnaA02G0110000ZS	LSH5	protein LIGHT-DEPENDENT SHORT HYPOCOTYLS 5 [Brassica napus]
MSTRG.7717.1	BnaA02G0110100ZS	TAF15B	transcription initiation factor TFIID subunit 15b-like [Brassica napus]
MSTRG.7719.1	BnaA02G0109900ZS	At5g39865	BnaA02g07580D [Brassica napus]
MSTRG.7719.1	BnaA02G0110000ZS	LSH5	protein LIGHT-DEPENDENT SHORT HYPOCOTYLS 5 [Brassica napus]
MSTRG.7719.1	BnaA02G0110100ZS	TAF15B	transcription initiation factor TFIID subunit 15b-like [Brassica napus]
MSTRG.7728.2	BnaA02G0110900ZS	--	myb-like HTH transcriptional regulator family protein [Arabidopsis thaliana]
MSTRG.7728.2	BnaA02G0111100ZS	At5g58330	malate dehydrogenase [NADP], chloroplastic [Brassica rapa]
MSTRG.7728.2	BnaA02G0111300ZS	MES18	methylesterase 18-like [Brassica napus]
MSTRG.7728.2	BnaA02G0111400ZS	At5g58300	probable inactive receptor kinase At5g58300 [Brassica napus]
MSTRG.7791.1	MSTRG.7787	XTH22	xyloglucan endotransglucosylase/hydrolase protein 22 [Brassica napus]
MSTRG.7791.1	BnaA02G0117000ZS	XTH22	BnaA02g35250D [Brassica napus]
MSTRG.7816.1	BnaA02G0120100ZS	--	caskin-1 [Brassica rapa]
MSTRG.7816.1	BnaA02G0119900ZS	ACA8	calcium-transporting ATPase 8, plasma membrane-type [Brassica rapa]
MSTRG.7832.1	BnaA02G0121600ZS	At5g56420	F-box/FBD/LRR-repeat protein At5g56420-like [Brassica napus]
MSTRG.7832.3	BnaA02G0121600ZS	At5g56420	F-box/FBD/LRR-repeat protein At5g56420-like [Brassica napus]
MSTRG.7834.1	BnaA02G0121600ZS	At5g56420	F-box/FBD/LRR-repeat protein At5g56420-like [Brassica napus]
MSTRG.7837.1	BnaA02G0121900ZS	RPS30A	40S ribosomal protein S30 [Pyrus ussuriensis x Pyrus communis]
MSTRG.7837.1	BnaA02G0122000ZS	MIOX5	inositol oxygenase 5-like [Brassica napus]
MSTRG.7837.1	BnaA02G0122100ZS	PFK7	ATP-dependent 6-phosphofructokinase 7-like [Brassica napus]
MSTRG.7842.2	BnaA02G0122700ZS	--	BnaA02g08580D [Brassica napus]
MSTRG.7852.1	BnaA02G0123300ZS	At4g12617	BnaC03g29690D [Brassica napus]
MSTRG.7852.2	BnaA02G0123300ZS	At4g12617	BnaC03g29690D [Brassica napus]
MSTRG.7852.3	BnaA02G0123300ZS	At4g12617	BnaC03g29690D [Brassica napus]
MSTRG.7870.1	BnaA02G0125600ZS	D6PK	serine/threonine-protein kinase D6PK-like [Brassica napus]
MSTRG.7870.1	BnaA02G0125700ZS	NOI4	protein NOI4 [Brassica rapa]
MSTRG.7870.1	BnaA02G0125900ZS	--	formin-like protein 14 [Brassica rapa]
MSTRG.7870.1	BnaA02G0126000ZS	FLA1	fasciclin-like arabinogalactan protein 1 [Brassica rapa]
MSTRG.7870.1	BnaA02G0126200ZS	TIC20-V	protein TIC 20-v, chloroplastic-like [Brassica napus]
MSTRG.7872.1	BnaA02G0125600ZS	D6PK	serine/threonine-protein kinase D6PK-like [Brassica napus]
MSTRG.7872.1	BnaA02G0125700ZS	NOI4	protein NOI4 [Brassica rapa]
MSTRG.7872.1	BnaA02G0125900ZS	--	formin-like protein 14 [Brassica rapa]
MSTRG.7872.1	BnaA02G0126000ZS	FLA1	fasciclin-like arabinogalactan protein 1 [Brassica rapa]
MSTRG.7872.1	BnaA02G0126200ZS	TIC20-V	protein TIC 20-v, chloroplastic-like [Brassica napus]
MSTRG.7884.1	BnaA02G0126800ZS	QRT1	pectinesterase QRT1 [Brassica rapa]
MSTRG.7884.1	BnaA02G0127000ZS	--	PREDICTED: LRR receptor-like serine/threonine-protein kinase FLS2 [Raphanus sativus]
MSTRG.7884.1	BnaA02G0126700ZS	--	BnaA02g08950D [Brassica napus]
MSTRG.7895.1	BnaA02G0128300ZS	ROD1	phosphatidylcholine:diacylglycerol cholinephosphotransferase 1-like [Brassica napus]
MSTRG.7923.1	BnaA02G0131200ZS	GPT1	glucose-6-phosphate/phosphate translocator 1, chloroplastic [Brassica rapa]
MSTRG.7929.1	BnaA02G0131700ZS	ATG18F	autophagy-related protein 18f-like [Brassica napus]
MSTRG.7958.1	BnaA02G0133400ZS	AHL	PAP-specific phosphatase HAL2-like [Brassica napus]
MSTRG.7958.1	BnaA02G0133500ZS	PRMT10	protein arginine N-methyltransferase PRMT10-like [Brassica napus]
MSTRG.7958.1	BnaA02G0133600ZS	SCPL42	serine carboxypeptidase-like 42 isoform X1 [Brassica napus]
MSTRG.7966.1	BnaA02G0134400ZS	CNGC4	cyclic nucleotide-gated ion channel 4-like [Brassica napus]
MSTRG.7966.1	BnaA02G0134600ZS	At5g41720	PREDICTED: F-box protein At5g49610-like [Camelina sativa]
MSTRG.7967.1	BnaA02G0134400ZS	CNGC4	cyclic nucleotide-gated ion channel 4-like [Brassica napus]
MSTRG.7967.1	BnaA02G0134600ZS	At5g41720	PREDICTED: F-box protein At5g49610-like [Camelina sativa]
MSTRG.7967.1	BnaA02G0134700ZS	OMT1	flavone 3'-O-methyltransferase 1-like isoform X1 [Brassica napus]
MSTRG.8005.1	BnaA02G0139100ZS	--	zinc finger protein CONSTANS-LIKE 9-like isoform X1 [Brassica napus]
MSTRG.8046.2	BnaA02G0143300ZS	ABCG8	ABC transporter G family member 8 isoform X2 [Brassica napus]
MSTRG.8059.1	BnaA02G0144500ZS	--	stress response protein NST1 [Brassica rapa]
MSTRG.8059.1	BnaA02G0144800ZS	yjcL	uncharacterized membrane protein YjcL [Brassica rapa]
MSTRG.8076.1	BnaA02G0145900ZS	EXO70A1	exocyst complex component EXO70A1 isoform X1 [Brassica rapa]
MSTRG.8076.1	BnaA02G0146000ZS	LTI65	low-temperature-induced 65 kDa protein-like isoform X1 [Brassica napus]
MSTRG.8076.1	BnaA02G0146100ZS	LTI65	low-temperature-induced 65 kDa protein-like [Brassica napus]
MSTRG.8076.1	BnaA02G0146200ZS	--	myosin heavy chain, striated muscle [Brassica rapa]
MSTRG.8078.2	BnaA02G0146100ZS	LTI65	low-temperature-induced 65 kDa protein-like [Brassica napus]
MSTRG.8080.1	BnaA02G0147000ZS	BAG1	BAG family molecular chaperone regulator 1-like [Brassica napus]
MSTRG.8118.1	BnaA02G0149700ZS	COG7	conserved oligomeric Golgi complex subunit 7-like [Brassica napus]
MSTRG.8129.1	BnaA02G0151400ZS	--	BnaA02g11500D [Brassica napus]
MSTRG.8129.1	BnaA02G0151500ZS	--	GDSL esterase/lipase At4g10955-like [Brassica napus]
MSTRG.8141.1	BnaA02G0152200ZS	HSD1	11-beta-hydroxysteroid dehydrogenase 1A [Brassica rapa]
MSTRG.8151.1	BnaA02G0152400ZS	MCH1	protein NUCLEAR FUSION DEFECTIVE 4 [Brassica rapa]
MSTRG.8151.1	BnaA02G0152800ZS	--	molecular chaperone Hsp40/DnaJ family protein [Arabidopsis thaliana]
MSTRG.8151.2	BnaA02G0152400ZS	MCH1	protein NUCLEAR FUSION DEFECTIVE 4 [Brassica rapa]
MSTRG.8151.2	BnaA02G0152800ZS	--	molecular chaperone Hsp40/DnaJ family protein [Arabidopsis thaliana]
MSTRG.8164.1	BnaA02G0153600ZS	At5g49960	probable ion channel POLLUX isoform X1 [Brassica napus]
MSTRG.8178.1	BnaA02G0154800ZS	HRD1B	ERAD-associated E3 ubiquitin-protein ligase HRD1B [Brassica napus]
MSTRG.8178.1	BnaA02G0154900ZS	mutS2	endonuclease MutS2 isoform X1 [Brassica rapa]
MSTRG.8178.1	BnaA02G0155000ZS	ALB3L2	PREDICTED: ALBINO3-like protein 2, chloroplastic isoform X2 [Brassica oleracea var. oleracea] [Brassica oleracea]
MSTRG.8205.1	BnaA02G0157300ZS	KOR2	PREDICTED: endoglucanase 7 [Brassica oleracea var. oleracea] [Brassica oleracea]
MSTRG.8205.1	BnaA02G0157200ZS	DBR	BnaA02g12150D [Brassica napus]
MSTRG.8212.1	BnaA02G0157900ZS	NHL6	NDR1/HIN1-like protein 6 [Brassica napus]
MSTRG.8222.1	BnaA02G0159800ZS	At1g07440	tropinone reductase homolog At1g07440 [Brassica rapa]
MSTRG.8225.1	BnaA02G0159800ZS	At1g07440	tropinone reductase homolog At1g07440 [Brassica rapa]
MSTRG.8242.1	BnaA02G0162000ZS	LRK10L-1.4	LEAF RUST 10 DISEASE-RESISTANCE LOCUS RECEPTOR-LIKE PROTEIN KINASE-like 1.4 isoform X1 [Brassica napus]
MSTRG.8247.1	BnaA02G0162900ZS	--	BnaA02g12760D [Brassica napus]
MSTRG.8274.1	BnaA02G0164900ZS	HAC2	histone acetyltransferase HAC2 [Brassica rapa]
MSTRG.8286.1	MSTRG.8283	At1g67340	F-box protein At1g67340-like [Brassica napus]
MSTRG.8286.1	BnaA02G0165800ZS	At1g67360	REF/SRPP-like protein At1g67360 [Brassica napus]
MSTRG.8286.1	BnaA02G0166700ZS	YTM1	p21-activated protein kinase-interacting protein 1-like [Brassica napus]
MSTRG.8288.1	BnaA02G0165900ZS	--	BnaA02g13090D [Brassica napus]
MSTRG.8307.1	BnaA02G0168200ZS	THI2	thionin-like [Brassica napus]
MSTRG.8307.1	BnaA02G0168400ZS	PSBY	photosystem II core complex proteins psbY, chloroplastic [Brassica rapa]
MSTRG.8316.1	BnaA02G0169000ZS	SUFE2	sufE-like protein 2, chloroplastic [Brassica rapa]
MSTRG.8316.1	BnaA02G0169100ZS	At1g67820	probable protein phosphatase 2C 14 [Brassica napus]
MSTRG.8316.1	MSTRG.8320	--	glutathione S-transferase T3-like [Brassica rapa]
MSTRG.8323.1	BnaA02G0170100ZS	At1g67980	caffeoyl-CoA 3-O-methyltransferase [Arabidopsis thaliana]
MSTRG.8372.1	MSTRG.8371	--	BnaA01g21550D [Brassica napus]
MSTRG.8374.1	BnaA02G0175100ZS	NPF3.1	protein NRT1/ PTR FAMILY 3.1 [Brassica rapa]
MSTRG.8388.1	BnaA02G0176300ZS	CRWN3	protein CROWDED NUCLEI 3-like [Brassica napus]
MSTRG.8388.1	BnaA02G0176400ZS	CRWN3	protein CROWDED NUCLEI 3-like [Brassica napus]
MSTRG.8391.1	BnaA02G0176800ZS	--	BnaA02g14020D [Brassica napus]
MSTRG.8392.1	BnaA02G0176800ZS	--	BnaA02g14020D [Brassica napus]
MSTRG.8397.1	BnaA02G0177000ZS	--	80A08_14 [Brassica rapa subsp. pekinensis] [Brassica rapa]
MSTRG.8415.1	BnaA02G0179600ZS	--	BnaCnng30950D [Brassica napus]
MSTRG.8416.1	BnaA02G0179600ZS	--	BnaCnng30950D [Brassica napus]
MSTRG.8431.1	BnaA02G0180800ZS	gdap2	protein GDAP2 homolog [Brassica rapa]
MSTRG.8431.1	BnaA02G0181100ZS	MINE1	cell division topological specificity factor homolog, chloroplastic [Brassica rapa]
MSTRG.8431.1	BnaA02G0181400ZS	PAT22	probable protein S-acyltransferase 22 [Brassica rapa]
MSTRG.8436.1	BnaA02G0182000ZS	EXPA1	expansin-A1 [Brassica rapa]
MSTRG.8436.1	BnaA02G0182300ZS	LCR18	BnaA05g32220D [Brassica napus]
MSTRG.8454.1	BnaA02G0183700ZS	--	BnaCnng70820D [Brassica napus]
MSTRG.8464.1	BnaA02G0184100ZS	CBSCBS2	SNF1-related protein kinase regulatory subunit gamma-1-like [Brassica rapa]
MSTRG.8464.1	BnaA02G0184300ZS	HIR2	hypersensitive-induced response protein 2 [Brassica rapa]
MSTRG.8488.1	BnaA02G0186800ZS	TPS8	probable alpha,alpha-trehalose-phosphate synthase [UDP-forming] 8 [Brassica napus]
MSTRG.8506.1	BnaA02G0188300ZS	ARF2-A	PREDICTED: ADP-ribosylation factor 2-B isoform X1 [Raphanus sativus]
MSTRG.8506.1	BnaA02G0188500ZS	--	BnaC02g19880D [Brassica napus]
MSTRG.8508.1	BnaA02G0188500ZS	--	BnaC02g19880D [Brassica napus]
MSTRG.8511.1	BnaA02G0188900ZS	--	BnaC02g19970D [Brassica napus]
MSTRG.8511.1	BnaA02G0189000ZS	TAA1	L-tryptophan--pyruvate aminotransferase 1 [Brassica rapa]
MSTRG.8511.2	BnaA02G0188900ZS	--	BnaC02g19970D [Brassica napus]
MSTRG.8512.1	BnaA02G0189000ZS	TAA1	L-tryptophan--pyruvate aminotransferase 1 [Brassica rapa]
MSTRG.8512.1	BnaA02G0189100ZS	trpD	anthranilate phosphoribosyltransferase [Brassica rapa]
MSTRG.8516.2	BnaA02G0189100ZS	trpD	anthranilate phosphoribosyltransferase [Brassica rapa]
MSTRG.8516.2	MSTRG.8518	RPL27AC	60S ribosomal protein L27a-3-like [Brassica napus]
MSTRG.8519.5	MSTRG.8518	RPL27AC	60S ribosomal protein L27a-3-like [Brassica napus]
MSTRG.8519.5	BnaA02G0189500ZS	mak16-a	protein MAK16 homolog [Brassica napus]
MSTRG.8519.5	BnaA02G0189600ZS	UEV1B	ubiquitin-conjugating enzyme E2 variant 1B [Brassica rapa]
MSTRG.8522.1	BnaA02G0189500ZS	mak16-a	protein MAK16 homolog [Brassica napus]
MSTRG.8522.1	BnaA02G0189600ZS	UEV1B	ubiquitin-conjugating enzyme E2 variant 1B [Brassica rapa]
MSTRG.8522.1	BnaA02G0189800ZS	PXG4	probable peroxygenase 4 [Brassica napus]
MSTRG.8524.1	BnaA02G0189800ZS	PXG4	probable peroxygenase 4 [Brassica napus]
MSTRG.8524.1	BnaA02G0190100ZS	TIFY7	protein TIFY 7 isoform X2 [Brassica rapa]
MSTRG.8524.1	BnaA02G0190000ZS	PDLP5	cysteine-rich repeat secretory protein 2 isoform X1 [Brassica napus]
MSTRG.8529.1	BnaA02G0190600ZS	ndhL	NAD(P)H-quinone oxidoreductase subunit L, chloroplastic [Brassica rapa]
MSTRG.8529.2	BnaA02G0190600ZS	ndhL	NAD(P)H-quinone oxidoreductase subunit L, chloroplastic [Brassica rapa]
MSTRG.8534.1	BnaA02G0190800ZS	--	At1g70780/F5A18_4 [Arabidopsis thaliana]
MSTRG.8565.1	BnaA02G0193900ZS	At1g09600	probable serine/threonine-protein kinase At1g09600 [Brassica rapa]
MSTRG.8565.2	BnaA02G0193900ZS	At1g09600	probable serine/threonine-protein kinase At1g09600 [Brassica rapa]
MSTRG.8567.1	BnaA02G0193900ZS	At1g09600	probable serine/threonine-protein kinase At1g09600 [Brassica rapa]
MSTRG.8572.1	BnaA02G0195000ZS	CSTF64	cleavage stimulating factor 64-like [Brassica napus]
MSTRG.8578.1	BnaA02G0195400ZS	DTX54	protein DETOXIFICATION 54 [Brassica rapa]
MSTRG.8581.1	BnaA02G0195600ZS	SUC1	sucrose transport protein SUC1 isoform X1 [Brassica rapa]
MSTRG.8596.1	BnaA02G0196800ZS	TCP22	transcription factor TCP22-like [Brassica napus]
MSTRG.8596.1	BnaA02G0197300ZS	tmem205	late embryogenesis abundant domain-containing protein / LEA domain-containing protein [Arabidopsis thaliana]
MSTRG.8596.1	BnaA02G0197400ZS	--	unnamed protein product [Brassica rapa]
MSTRG.8620.1	BnaA02G0199400ZS	ATL3	RING-H2 finger protein ATL3-like [Brassica napus]
MSTRG.8636.1	BnaA02G0200700ZS	--	BnaC02g46320D [Brassica napus]
MSTRG.8636.2	BnaA02G0200700ZS	--	BnaC02g46320D [Brassica napus]
MSTRG.8643.1	BnaA02G0201300ZS	AIL1	AP2-like ethylene-responsive transcription factor AIL1 [Brassica napus]
MSTRG.8658.1	BnaA02G0201900ZS	TIF4A-3	eukaryotic initiation factor 4A-3-like isoform X1 [Brassica napus]
MSTRG.8674.1	BnaA02G0203600ZS	--	PREDICTED: 5'-nucleotidase SurE isoform X3 [Brassica oleracea var. oleracea] [Brassica oleracea]
MSTRG.8698.1	BnaA02G0205700ZS	2022-10-01	organic cation/carnitine transporter 1-like [Brassica napus]
MSTRG.8698.1	BnaA02G0205900ZS	2022-10-01	organic cation/carnitine transporter 1-like [Brassica napus]
MSTRG.8704.1	BnaA02G0206500ZS	MYB54	transcription factor MYB52-like [Brassica napus]
MSTRG.8704.1	BnaA02G0206600ZS	COG3	PREDICTED: LOW QUALITY PROTEIN: conserved oligomeric Golgi complex subunit 3 [Brassica oleracea var. oleracea] [Brassica oleracea]
MSTRG.8707.2	BnaA02G0206500ZS	MYB54	transcription factor MYB52-like [Brassica napus]
MSTRG.8712.2	BnaA02G0206800ZS	--	BnaA02g16450D [Brassica napus]
MSTRG.8712.2	BnaA02G0206900ZS	MKK9	mitogen-activated protein kinase kinase 9-like [Brassica napus]
MSTRG.8712.2	BnaA02G0207200ZS	--	lipid transfer-like protein VAS [Brassica rapa]
MSTRG.8715.1	BnaA02G0207100ZS	NUDT21	nudix hydrolase 21, chloroplastic [Brassica rapa]
MSTRG.8715.1	BnaA02G0207200ZS	--	lipid transfer-like protein VAS [Brassica rapa]
MSTRG.8716.1	BnaA02G0207200ZS	--	lipid transfer-like protein VAS [Brassica rapa]
MSTRG.8719.1	BnaA02G0207800ZS	--	BnaA02g16510D [Brassica napus]
MSTRG.8719.1	BnaA02G0207700ZS	PIN1	auxin efflux carrier component 1-like [Brassica napus]
MSTRG.8724.1	BnaA02G0207800ZS	--	BnaA02g16510D [Brassica napus]
MSTRG.8724.1	BnaA02G0208000ZS	At3g46050	F-box/kelch-repeat protein At5g49000-like [Brassica napus]
MSTRG.8724.1	BnaA02G0208200ZS	At5g03000	F-box/kelch-repeat protein At4g39560-like [Brassica napus]
MSTRG.8724.2	BnaA02G0207800ZS	--	BnaA02g16510D [Brassica napus]
MSTRG.8724.2	BnaA02G0208000ZS	At3g46050	F-box/kelch-repeat protein At5g49000-like [Brassica napus]
MSTRG.8724.2	BnaA02G0208200ZS	At5g03000	F-box/kelch-repeat protein At4g39560-like [Brassica napus]
MSTRG.8738.1	BnaA02G0209200ZS	SSL11	protein STRICTOSIDINE SYNTHASE-LIKE 11-like [Brassica napus]
MSTRG.8738.1	BnaA02G0209300ZS	SSL12	protein STRICTOSIDINE SYNTHASE-LIKE 12 [Brassica rapa]
MSTRG.8738.1	BnaA02G0209400ZS	SSL12	protein STRICTOSIDINE SYNTHASE-LIKE 12-like [Brassica napus]
MSTRG.8771.3	BnaA02G0212700ZS	TRZ1	tRNase Z TRZ1 [Brassica napus]
MSTRG.8775.2	BnaA02G0212900ZS	--	Similar to gb|D86180 phosphoribosylanthranilate transferase from Pisum sativum and contains 2 PF|00168 C2 (phospholipid binding) domains. ESTs gb|H76726, gb|T45544 and gb|N96377 come from this gene [Arabidopsis thaliana]
MSTRG.8775.2	BnaA02G0213200ZS	KUA1	transcription factor MYB1R1 [Brassica rapa]
MSTRG.8785.1	MSTRG.8782	LPAT4	probable 1-acyl-sn-glycerol-3-phosphate acyltransferase 4 isoform X1 [Brassica rapa]
MSTRG.8785.1	MSTRG.8783	At1g75040	BnaA02g17100D [Brassica napus]
MSTRG.8785.1	MSTRG.8786	--	BnaCnng08120D [Brassica napus]
MSTRG.8785.2	MSTRG.8782	LPAT4	probable 1-acyl-sn-glycerol-3-phosphate acyltransferase 4 isoform X1 [Brassica rapa]
MSTRG.8785.2	MSTRG.8783	At1g75040	BnaA02g17100D [Brassica napus]
MSTRG.8785.2	MSTRG.8786	--	BnaCnng08120D [Brassica napus]
MSTRG.8789.1	BnaA02G0213800ZS	At1g01500	BnaA02g35900D [Brassica napus]
MSTRG.8789.1	BnaA02G0214000ZS	At1g75220	sugar transporter ERD6-like 6 [Brassica rapa]
MSTRG.8798.1	BnaA02G0214800ZS	BBD1	bifunctional nuclease 1 [Brassica rapa]
MSTRG.8798.1	MSTRG.8799	--	BnaCnng71980D [Brassica napus]
MSTRG.8800.1	MSTRG.8799	--	BnaCnng71980D [Brassica napus]
MSTRG.8800.1	BnaA02G0215000ZS	BZIP44	bZIP transcription factor 44 [Brassica rapa]
MSTRG.8800.1	MSTRG.8803	--	DNA-3-methyladenine glycosylase 1 [Brassica rapa]
MSTRG.8801.1	MSTRG.8799	--	BnaCnng71980D [Brassica napus]
MSTRG.8801.1	MSTRG.8803	--	DNA-3-methyladenine glycosylase 1 [Brassica rapa]
MSTRG.8803.1	BnaA02G0215000ZS	BZIP44	bZIP transcription factor 44 [Brassica rapa]
MSTRG.8805.1	MSTRG.8803	--	DNA-3-methyladenine glycosylase 1 [Brassica rapa]
MSTRG.8812.1	BnaA02G0216000ZS	TFG2	transcription initiation factor IIF subunit beta [Brassica napus]
MSTRG.8812.1	BnaA02G0216100ZS	SRS5	protein SHI RELATED SEQUENCE 5 [Brassica napus]
MSTRG.8818.1	BnaA02G0216400ZS	--	uncharacterized protein LOC117131743 [Brassica rapa]
MSTRG.8849.1	BnaA02G0219700ZS	PREP	prolyl endopeptidase-like [Brassica napus]
MSTRG.8851.1	BnaA02G0219700ZS	PREP	prolyl endopeptidase-like [Brassica napus]
MSTRG.8851.1	BnaA02G0219800ZS	Bp10	L-ascorbate oxidase homolog [Brassica napus]
MSTRG.8861.1	BnaA02G0220100ZS	At1g76200	UPF0725 protein At2g20620 isoform X1 [Brassica rapa]
MSTRG.8861.1	BnaA02G0220400ZS	--	BnaA02g17970D [Brassica napus]
MSTRG.8869.2	BnaA02G0221100ZS	--	BnaA02g18060D [Brassica napus]
MSTRG.8933.1	BnaA02G0227600ZS	--	junctophilin-1-like [Brassica napus]
MSTRG.8933.1	BnaA02G0227700ZS	SOV	DIS3-like exonuclease 2 isoform X1 [Brassica napus]
MSTRG.8940.1	BnaA02G0228500ZS	NIA2	nitrate reductase [NADH], clone PBNBR1412-like [Brassica napus]
MSTRG.8940.1	BnaA02G0228300ZS	RPS13	small ribosomal subunit protein S13, mitochondrial [Brassica rapa]
MSTRG.8963.1	BnaA02G0230800ZS	--	BnaA02g18820D [Brassica napus]
MSTRG.8966.1	BnaA02G0230800ZS	--	BnaA02g18820D [Brassica napus]
MSTRG.8973.1	BnaA02G0231100ZS	UGT85A4	UDP-glycosyltransferase 85A4 [Brassica rapa]
MSTRG.8973.1	BnaA02G0231400ZS	GSTU19	glutathione S-transferase U19 [Brassica rapa]
MSTRG.8987.1	BnaA02G0233200ZS	Alg2	alpha-1,3/1,6-mannosyltransferase ALG2 [Arabidopsis lyrata subsp. lyrata] [Arabidopsis lyrata]
MSTRG.8987.1	BnaA02G0233300ZS	--	BnaA02g19040D [Brassica napus]
MSTRG.8987.1	BnaA02G0232900ZS	GGH1	gamma-glutamyl hydrolase 1-like [Brassica napus]
MSTRG.8992.1	MSTRG.8991	--	meiosis-specific protein ASY2-like [Brassica rapa]
MSTRG.8995.1	BnaA02G0233600ZS	UBC36	ubiquitin-conjugating enzyme E2 36 [Brassica rapa]
MSTRG.9007.1	MSTRG.9005	--	F-box protein At2g35280-like [Brassica napus]
MSTRG.9018.1	BnaA02G0236000ZS	--	TELO2-interacting protein 1 homolog [Brassica napus]
MSTRG.9018.1	BnaA02G0236100ZS	PAB1	proteasome subunit PAB1 [Arabidopsis thaliana]
MSTRG.9023.2	BnaA02G0236700ZS	ECT2	YTH domain-containing family protein 2-like [Brassica napus]
MSTRG.9023.2	BnaA02G0236900ZS	AMC5	metacaspase-5 [Brassica napus]
MSTRG.9023.1	BnaA02G0236700ZS	ECT2	YTH domain-containing family protein 2-like [Brassica napus]
MSTRG.9023.1	BnaA02G0236900ZS	AMC5	metacaspase-5 [Brassica napus]
MSTRG.9024.1	BnaA02G0236700ZS	ECT2	YTH domain-containing family protein 2-like [Brassica napus]
MSTRG.9024.1	BnaA02G0236900ZS	AMC5	metacaspase-5 [Brassica napus]
MSTRG.9024.1	BnaA02G0237300ZS	2022-10-02	organic cation/carnitine transporter 2 [Brassica napus]
MSTRG.9024.2	BnaA02G0236700ZS	ECT2	YTH domain-containing family protein 2-like [Brassica napus]
MSTRG.9024.2	BnaA02G0236900ZS	AMC5	metacaspase-5 [Brassica napus]
MSTRG.9024.2	BnaA02G0237300ZS	2022-10-02	organic cation/carnitine transporter 2 [Brassica napus]
MSTRG.9028.1	MSTRG.9032	BRR2A	DExH-box ATP-dependent RNA helicase DExH12-like isoform X1 [Brassica napus]
MSTRG.9034.1	BnaA02G0237800ZS	KDSA1	2-dehydro-3-deoxyphosphooctonate aldolase 1 [Brassica rapa]
MSTRG.9034.1	BnaA02G0238000ZS	GAPCP1	glyceraldehyde-3-phosphate dehydrogenase GAPCP1, chloroplastic [Brassica rapa]
MSTRG.9037.3	BnaA02G0238400ZS	PGK3	phosphoglycerate kinase 3, cytosolic [Brassica rapa]
MSTRG.9037.3	BnaA02G0238000ZS	GAPCP1	glyceraldehyde-3-phosphate dehydrogenase GAPCP1, chloroplastic [Brassica rapa]
MSTRG.9086.1	BnaA02G0243500ZS	GLPK	BnaA02g19720D [Brassica napus]
MSTRG.9100.1	BnaA02G0244600ZS	GA3OX4	gibberellin 3-beta-dioxygenase 4 [Brassica napus]
MSTRG.9114.1	BnaA02G0246100ZS	--	BnaA02g20020D [Brassica napus]
MSTRG.9179.1	BnaA02G0252600ZS	--	L10-interacting MYB domain-containing protein [Brassica rapa]
MSTRG.9184.1	BnaA02G0253300ZS	DRP1A	BnaA06g20020D [Brassica napus]
MSTRG.9184.1	BnaA02G0253200ZS	At4g02290	endoglucanase 17 [Brassica rapa]
MSTRG.9186.1	BnaA02G0253200ZS	At4g02290	endoglucanase 17 [Brassica rapa]
MSTRG.9202.1	BnaA02G0254900ZS	XXT2	xyloglucan 6-xylosyltransferase 2-like [Brassica napus]
MSTRG.9232.1	BnaA02G0258500ZS	At1g43910	BnaA10g08870D [Brassica napus]
MSTRG.9267.1	BnaA02G0263200ZS	--	BnaA03g54470D [Brassica napus]
MSTRG.9294.3	BnaA02G0265100ZS	HMGS	BnaA02g21580D [Brassica napus]
MSTRG.9297.1	BnaA02G0265100ZS	HMGS	BnaA02g21580D [Brassica napus]
MSTRG.9302.1	BnaA02G0265500ZS	At5g58784	dehydrodolichyl diphosphate synthase 5-like [Brassica napus]
MSTRG.9325.1	BnaA02G0268400ZS	VHA-E1	V-type proton ATPase subunit E1 [Brassica rapa]
MSTRG.9411.1	MSTRG.9410	THE1	BnaA03g11880D [Brassica napus]
MSTRG.9415.1	MSTRG.9413	THE1	BnaA03g11880D [Brassica napus]
MSTRG.9480.1	BnaA02G0283600ZS	--	rRNA-processing protein EFG1 [Brassica rapa]
MSTRG.9521.1	BnaA02G0288400ZS	MCM6	DNA replication licensing factor MCM6-like [Brassica napus]
MSTRG.9564.1	BnaA02G0293000ZS	DUR3	urea-proton symporter DUR3-like [Brassica napus]
MSTRG.9622.1	BnaA02G0298800ZS	MCM3	DNA replication licensing factor MCM3-like [Brassica napus]
MSTRG.9640.1	BnaA02G0301200ZS	--	At5g46620 [Arabidopsis thaliana]
MSTRG.9642.1	MSTRG.9643	--	protein ALP1-like isoform X3 [Brassica rapa]
MSTRG.9642.1	BnaA02G0301200ZS	--	At5g46620 [Arabidopsis thaliana]
MSTRG.9642.1	BnaA02G0301300ZS	AP2M	AP-2 complex subunit mu [Brassica rapa]
MSTRG.9645.1	MSTRG.9643	--	protein ALP1-like isoform X3 [Brassica rapa]
MSTRG.9645.3	MSTRG.9643	--	protein ALP1-like isoform X3 [Brassica rapa]
MSTRG.9649.1	BnaA02G0301900ZS	--	BnaA09g16940D [Brassica napus]
MSTRG.9662.1	BnaA02G0303200ZS	SYP22	syntaxin-22 [Brassica napus]
MSTRG.9693.3	BnaA02G0304600ZS	FLZ1	FCS-Like Zinc finger 1 [Brassica rapa]
MSTRG.9704.1	BnaA02G0305700ZS	SOX	sulfite oxidase [Brassica napus]
MSTRG.9705.1	BnaA02G0305700ZS	SOX	sulfite oxidase [Brassica napus]
MSTRG.9705.1	BnaA02G0305800ZS	LIL3.2	light-harvesting complex-like protein 3 isotype 2, chloroplastic [Brassica napus]
MSTRG.9726.1	BnaA02G0307400ZS	ROPGEF6	BnaA02g25210D [Brassica napus]
MSTRG.9726.2	BnaA02G0307400ZS	ROPGEF6	BnaA02g25210D [Brassica napus]
MSTRG.9728.1	BnaA02G0307400ZS	ROPGEF6	BnaA02g25210D [Brassica napus]
MSTRG.9738.1	BnaA02G0308600ZS	PME68	probable pectinesterase 68 [Brassica napus]
MSTRG.9738.2	BnaA02G0308600ZS	PME68	probable pectinesterase 68 [Brassica napus]
MSTRG.9779.1	BnaA02G0312200ZS	RHA2B	E3 ubiquitin-protein ligase RHA2B-like [Brassica napus]
MSTRG.9782.1	BnaA02G0312200ZS	RHA2B	E3 ubiquitin-protein ligase RHA2B-like [Brassica napus]
MSTRG.9810.1	MSTRG.9811	--	plasmodesmata-located protein 2-like isoform X2 [Brassica rapa]
MSTRG.9810.1	MSTRG.9812	--	retroelement pol polyprotein-like [Arabidopsis thaliana]
MSTRG.9810.2	MSTRG.9811	--	plasmodesmata-located protein 2-like isoform X2 [Brassica rapa]
MSTRG.9810.2	MSTRG.9812	--	retroelement pol polyprotein-like [Arabidopsis thaliana]
MSTRG.9810.3	MSTRG.9811	--	plasmodesmata-located protein 2-like isoform X2 [Brassica rapa]
MSTRG.9810.3	MSTRG.9812	--	retroelement pol polyprotein-like [Arabidopsis thaliana]
MSTRG.9811.2	MSTRG.9812	--	retroelement pol polyprotein-like [Arabidopsis thaliana]
MSTRG.9872.1	BnaA02G0321600ZS	PSKR1	phytosulfokine receptor 1-like [Brassica napus]
MSTRG.9872.2	BnaA02G0321600ZS	PSKR1	phytosulfokine receptor 1-like [Brassica napus]
MSTRG.9876.1	BnaA02G0322000ZS	At2g02240	BnaA02g26300D [Brassica napus]
MSTRG.9884.1	MSTRG.9886	--	BnaCnng11820D [Brassica napus]
MSTRG.9888.1	MSTRG.9887	--	BnaC04g29760D [Brassica napus]
MSTRG.9888.1	MSTRG.9886	--	BnaCnng11820D [Brassica napus]
MSTRG.9889.1	MSTRG.9887	--	BnaC04g29760D [Brassica napus]
MSTRG.9893.1	BnaA02G0324000ZS	At1g09650	BnaA02g26500D [Brassica napus]
MSTRG.9894.4	BnaA02G0324000ZS	At1g09650	BnaA02g26500D [Brassica napus]
MSTRG.9915.1	BnaA02G0325400ZS	--	BnaA02g26620D [Brassica napus]
MSTRG.9930.1	BnaA02G0326600ZS	SBT1.9	subtilisin-like protease SBT1.9 [Brassica napus]
MSTRG.9930.1	BnaA02G0326800ZS	At2g03290	transmembrane emp24 domain-containing protein p24delta8 [Brassica napus]
MSTRG.9930.2	BnaA02G0326600ZS	SBT1.9	subtilisin-like protease SBT1.9 [Brassica napus]
MSTRG.9930.2	BnaA02G0326800ZS	At2g03290	transmembrane emp24 domain-containing protein p24delta8 [Brassica napus]
MSTRG.9946.1	BnaA02G0328800ZS	SOT11	BnaA02g27270D [Brassica napus]
MSTRG.9955.3	BnaA02G0330300ZS	HSP90-5	BnaAnng22010D [Brassica napus]
MSTRG.9959.1	BnaA02G0330600ZS	At2g04925	defensin-like protein 292 [Brassica napus]
MSTRG.9959.3	BnaA02G0330600ZS	At2g04925	defensin-like protein 292 [Brassica napus]
MSTRG.9975.1	BnaA02G0332900ZS	IRE1A	BnaC07g21150D [Brassica napus]
MSTRG.9975.1	BnaA02G0333200ZS	APF2	aspartyl protease family protein 2-like [Brassica napus]
MSTRG.9985.1	MSTRG.9983	CYP705A1	cytochrome P450 705A22 [Brassica napus]
MSTRG.9985.1	BnaA02G0334000ZS	--	BnaA02g27660D [Brassica napus]
MSTRG.10000.1	MSTRG.9999	CYP71B20	cytochrome P450 71B19-like [Brassica napus]
MSTRG.10007.2	BnaA02G0336200ZS	CYP71B34	cytochrome P450 71B34-like [Brassica napus]
MSTRG.10007.2	BnaA02G0336300ZS	--	coiled-coil domain-containing glutamate-rich protein 1-like isoform X1 [Brassica rapa]
MSTRG.10011.1	BnaA02G0336200ZS	CYP71B34	cytochrome P450 71B34-like [Brassica napus]
MSTRG.10011.1	BnaA02G0336300ZS	--	coiled-coil domain-containing glutamate-rich protein 1-like isoform X1 [Brassica rapa]
MSTRG.10089.1	BnaA02G0345800ZS	S2	oleosin S2-2 [Brassica rapa]
MSTRG.10089.1	BnaA02G0345900ZS	LHCB2.4	chlorophyll a-b binding protein 2.4, chloroplastic [Brassica rapa]
MSTRG.10115.1	MSTRG.10114	ABCB15	ABC transporter B family member 15 isoform X3 [Brassica rapa]
MSTRG.10115.2	MSTRG.10114	ABCB15	ABC transporter B family member 15 isoform X3 [Brassica rapa]
MSTRG.10142.1	MSTRG.10139	SGS3	PREDICTED: protein SUPPRESSOR OF GENE SILENCING 3-like [Brassica oleracea var. oleracea] [Brassica oleracea]
MSTRG.10142.1	BnaA02G0351200ZS	CML46	probable calcium-binding protein CML30 [Brassica napus]
MSTRG.10151.1	BnaA02G0352200ZS	--	BnaA02g29710D [Brassica napus]
MSTRG.10154.1	BnaA02G0352200ZS	--	BnaA02g29710D [Brassica napus]
MSTRG.10154.1	BnaA02G0352600ZS	--	BnaA02g29710D [Brassica napus]
MSTRG.10189.2	MSTRG.10191	SBT1.7	subtilisin-like protease SBT1.7 [Brassica napus]
MSTRG.10220.1	BnaA02G0358800ZS	RBOHD	respiratory burst oxidase homolog protein D-like [Brassica napus]
MSTRG.10229.1	BnaA02G0359500ZS	PAT1	scarecrow-like transcription factor PAT1 [Brassica rapa]
MSTRG.10229.1	BnaA02G0359600ZS	SNE	F-box protein SNE [Brassica napus]
MSTRG.10229.2	BnaA02G0359500ZS	PAT1	scarecrow-like transcription factor PAT1 [Brassica rapa]
MSTRG.10229.2	BnaA02G0359600ZS	SNE	F-box protein SNE [Brassica napus]
MSTRG.10231.1	BnaA02G0359600ZS	SNE	F-box protein SNE [Brassica napus]
MSTRG.10231.1	BnaA02G0359700ZS	NSP5	nitrile-specifier protein 5-like [Brassica napus]
MSTRG.10235.1	BnaA02G0360300ZS	COL10	zinc finger protein CONSTANS-LIKE 10-like [Brassica napus]
MSTRG.10294.3	BnaA02G0367300ZS	PHIP	bromodomain and WD repeat-containing protein 3 [Brassica rapa]
MSTRG.10310.1	BnaA02G0368500ZS	At5g49610	F-box protein At5g49610 [Brassica napus]
MSTRG.10331.1	BnaA02G0369900ZS	BIA1	protein ECERIFERUM 26-like [Brassica rapa]
MSTRG.10331.1	BnaA02G0370100ZS	NEK3	serine/threonine-protein kinase Nek3-like [Brassica napus]
MSTRG.10339.2	BnaA02G0371000ZS	--	BnaC02g39610D [Brassica napus]
MSTRG.10357.5	BnaA02G0373000ZS	--	heparan-alpha-glucosaminide N-acetyltransferase-like [Brassica napus]
MSTRG.10357.6	BnaA02G0373000ZS	--	heparan-alpha-glucosaminide N-acetyltransferase-like [Brassica napus]
MSTRG.10376.1	BnaA02G0375100ZS	--	BnaC02g48370D [Brassica napus]
MSTRG.10389.1	MSTRG.10387	--	MADS-box transcription factor PHERES 1-like [Brassica rapa]
MSTRG.10437.1	BnaA02G0379100ZS	--	BnaA02g27240D [Brassica napus]
MSTRG.10458.1	BnaA02G0381300ZS	HPAT1	hydroxyproline O-arabinosyltransferase 1 [Brassica napus]
MSTRG.10492.1	BnaA02G0385100ZS	--	protein fantom [Brassica napus]
MSTRG.10512.1	BnaA02G0387000ZS	At5g25290	F-box protein At5g25290-like [Brassica napus]
MSTRG.10515.1	BnaA02G0388400ZS	SRM1	transcription factor SRM1-like [Brassica napus]
MSTRG.10542.1	BnaA02G0389700ZS	--	F-box/LRR-repeat protein 4-like [Brassica rapa]
MSTRG.10542.1	BnaA02G0389900ZS	TT16	protein TRANSPARENT TESTA 16-like [Brassica napus]
MSTRG.10550.1	BnaA02G0389900ZS	TT16	protein TRANSPARENT TESTA 16-like [Brassica napus]
MSTRG.10550.1	BnaA02G0390000ZS	NIC2	nicotinamidase 2-like [Brassica rapa]
MSTRG.10550.1	BnaA02G0390100ZS	SCPL34	serine carboxypeptidase-like 34 [Brassica rapa]
MSTRG.10550.1	BnaA02G0390300ZS	CYP86B1	cytochrome P450 86B1-like [Brassica rapa]
MSTRG.10576.1	BnaA02G0393200ZS	AVT3A	amino acid transporter AVT3A [Brassica rapa]
MSTRG.10576.1	BnaA02G0393900ZS	At5g61620	probable transcription factor At5g61620 [Brassica napus]
MSTRG.10614.1	BnaA02G0396900ZS	Pgap3	post-GPI attachment to proteins factor 3-like [Brassica napus]
MSTRG.10614.1	BnaA02G0397000ZS	--	ATP-dependent Clp protease ATP-binding subunit [Arabidopsis thaliana]
MSTRG.10634.1	BnaA02G0399600ZS	IRE	probable serine/threonine protein kinase IRE [Capsella rubella]
MSTRG.10637.2	BnaA02G0399800ZS	PMEI11	pectinesterase inhibitor 11-like [Brassica napus]
MSTRG.10651.1	BnaA02G0401000ZS	SRO5	probable inactive poly [ADP-ribose] polymerase SRO5 [Brassica napus]
MSTRG.10682.1	BnaA02G0402900ZS	CDKG1	cyclin-dependent kinase G1 isoform X1 [Brassica napus]
MSTRG.10682.1	BnaA02G0403000ZS	4CLL9	4-coumarate--CoA ligase-like 9 [Brassica napus]
MSTRG.10695.1	BnaA02G0403900ZS	--	extensin-1-like [Brassica napus]
MSTRG.10695.1	BnaA02G0404000ZS	At5g63520	F-box/LRR-repeat protein At5g63520 isoform X2 [Brassica rapa]
MSTRG.10695.1	BnaA02G0404100ZS	--	branchpoint-bridging protein-like [Brassica napus]
MSTRG.10695.1	BnaA02G0404400ZS	HIPP07	heavy metal-associated isoprenylated plant protein 7-like [Brassica napus]
MSTRG.10763.1	MSTRG.10761	ZRK7	BnaA06g23800D [Brassica napus]
MSTRG.10792.1	BnaA02G0413500ZS	CG5412	esterase OVCA2 [Brassica rapa]
MSTRG.10796.1	BnaA02G0413800ZS	OFUT39	O-fucosyltransferase 39 isoform X2 [Brassica rapa]
MSTRG.10804.1	BnaA02G0414100ZS	RBK1	receptor-like cytosolic serine/threonine-protein kinase RBK1 [Brassica rapa]
MSTRG.10804.1	BnaA02G0414200ZS	DOF5.7	BnaAnng04950D [Brassica napus]
MSTRG.10807.1	BnaA02G0414300ZS	BHLH93	transcription factor bHLH93 [Brassica napus]
MSTRG.10815.1	BnaA02G0415200ZS	PSK5	phytosulfokines 5 [Brassica rapa]
MSTRG.10815.1	BnaA02G0415600ZS	--	cysteine-rich and transmembrane domain-containing protein WIH1 [Brassica rapa]
MSTRG.10821.1	BnaA02G0416300ZS	At1g66250	glucan endo-1,3-beta-glucosidase 12-like [Brassica napus]
MSTRG.10821.1	BnaA02G0416400ZS	AZF1	zinc finger protein AZF1-like [Brassica napus]
MSTRG.10825.1	BnaA02G0416300ZS	At1g66250	glucan endo-1,3-beta-glucosidase 12-like [Brassica napus]
MSTRG.10825.1	BnaA02G0416400ZS	AZF1	zinc finger protein AZF1-like [Brassica napus]
MSTRG.10838.1	MSTRG.10836	--	hypothetical transposable element-related protein, partial [Boechera divaricarpa]
MSTRG.10847.1	BnaA02G0418400ZS	--	-
MSTRG.10847.1	BnaA02G0418500ZS	At5g66650	calcium uniporter protein 3, mitochondrial [Brassica rapa]
MSTRG.10851.1	BnaA02G0418500ZS	At5g66650	calcium uniporter protein 3, mitochondrial [Brassica rapa]
MSTRG.10852.1	BnaA02G0418400ZS	--	-
MSTRG.10852.1	BnaA02G0418500ZS	At5g66650	calcium uniporter protein 3, mitochondrial [Brassica rapa]
MSTRG.10878.1	BnaA03G0000400ZS	At5g37450	probable LRR receptor-like serine/threonine-protein kinase At5g37450 isoform X1 [Brassica napus]
MSTRG.10879.1	BnaA03G0000100ZS	--	BnaA03g00020D [Brassica napus]
MSTRG.10879.1	BnaA03G0000400ZS	At5g37450	probable LRR receptor-like serine/threonine-protein kinase At5g37450 isoform X1 [Brassica napus]
MSTRG.10885.2	BnaA03G0000500ZS	At1g06840	probable LRR receptor-like serine/threonine-protein kinase At1g06840 [Brassica napus]
MSTRG.10885.2	BnaA03G0000700ZS	STN8	serine/threonine-protein kinase STN8, chloroplastic [Brassica napus]
MSTRG.10885.2	BnaA03G0000800ZS	--	BnaC03g71300D [Brassica napus]
MSTRG.10885.2	BnaA03G0000400ZS	At5g37450	probable LRR receptor-like serine/threonine-protein kinase At5g37450 isoform X1 [Brassica napus]
MSTRG.10892.1	BnaA03G0001000ZS	--	BnaA03g00140D [Brassica napus]
MSTRG.10892.1	MSTRG.10893	EXO70A1	PREDICTED: exocyst complex component EXO70A1-like [Brassica oleracea var. oleracea] [Brassica oleracea]
MSTRG.10892.1	BnaA03G0001300ZS	FBL3	F-box/LRR-repeat protein 3 [Brassica napus]
MSTRG.10898.1	MSTRG.10893	EXO70A1	PREDICTED: exocyst complex component EXO70A1-like [Brassica oleracea var. oleracea] [Brassica oleracea]
MSTRG.10898.1	BnaA03G0001500ZS	CHX27	cation/H(+) antiporter 27-like [Brassica napus]
MSTRG.10898.1	BnaA03G0001600ZS	AKR4C9	aldose reductase [Brassica napus]
MSTRG.10898.1	BnaA03G0001800ZS	PRA1B5	PRA1 family protein B5-like [Brassica napus]
MSTRG.10898.1	BnaA03G0001300ZS	FBL3	F-box/LRR-repeat protein 3 [Brassica napus]
MSTRG.10936.1	BnaA03G0004400ZS	LAC8	laccase-8-like isoform X2 [Brassica napus]
MSTRG.10939.1	BnaA03G0004700ZS	--	BnaA03g54770D [Brassica napus]
MSTRG.10939.1	MSTRG.10938	--	PREDICTED: heat shock protein DDB_G0288861-like [Camelina sativa]
MSTRG.10944.1	BnaA03G0004800ZS	BLH9	BEL1-like homeodomain protein 9 [Brassica napus]
MSTRG.10944.1	BnaA03G0004900ZS	PRA1A1	PRA1 family protein A1 [Brassica napus]
MSTRG.10944.1	BnaA03G0005000ZS	--	BnaA03g54960D [Brassica napus]
MSTRG.10944.1	BnaA03G0005200ZS	At5g02060	CASP-like protein 5B1 [Brassica napus]
MSTRG.10945.7	BnaA03G0004900ZS	PRA1A1	PRA1 family protein A1 [Brassica napus]
MSTRG.10945.7	BnaA03G0005000ZS	--	BnaA03g54960D [Brassica napus]
MSTRG.10945.7	BnaA03G0005400ZS	CYCD7-1	BnaA03g54990D [Brassica napus]
MSTRG.10945.7	BnaA03G0005500ZS	--	BnaA03g55010D [Brassica napus]
MSTRG.10946.1	BnaA03G0005200ZS	At5g02060	CASP-like protein 5B1 [Brassica napus]
MSTRG.10946.1	BnaA03G0006300ZS	ALG10	dol-P-Glc:Glc(2)Man(9)GlcNAc(2)-PP-Dol alpha-1,2-glucosyltransferase [Brassica rapa]
MSTRG.10963.1	BnaA03G0007100ZS	--	BnaC03g71280D [Brassica napus]
MSTRG.10963.1	BnaA03G0007200ZS	--	argininosuccinate lyase [Arabidopsis thaliana]
MSTRG.10963.1	BnaA03G0007300ZS	--	non-classical arabinogalactan protein 31 isoform X2 [Eutrema salsugineum]
MSTRG.10963.1	BnaA03G0007400ZS	SG1	protein SLOW GREEN 1, chloroplastic-like [Brassica napus]
MSTRG.10963.1	BnaA03G0007500ZS	CAND6	protein GPR107-like [Brassica napus]
MSTRG.11013.1	BnaA03G0011200ZS	MDAR2	monodehydroascorbate reductase 2 [Brassica napus]
MSTRG.11013.1	BnaA03G0011300ZS	--	BnaA03g01010D [Brassica napus]
MSTRG.11013.2	BnaA03G0011200ZS	MDAR2	monodehydroascorbate reductase 2 [Brassica napus]
MSTRG.11013.2	BnaA03G0011300ZS	--	BnaA03g01010D [Brassica napus]
MSTRG.11013.4	BnaA03G0011200ZS	MDAR2	monodehydroascorbate reductase 2 [Brassica napus]
MSTRG.11013.4	BnaA03G0011300ZS	--	BnaA03g01010D [Brassica napus]
MSTRG.11025.1	BnaA03G0013100ZS	SDP1	BnaA03g01150D [Brassica napus]
MSTRG.11026.1	BnaA03G0013100ZS	SDP1	BnaA03g01150D [Brassica napus]
MSTRG.11033.4	BnaA03G0013800ZS	GYRBC	BnaA03g55060D [Brassica napus]
MSTRG.11041.1	BnaA03G0014300ZS	At3g53190	probable pectate lyase 8 [Brassica napus]
MSTRG.11041.1	BnaA03G0014800ZS	NAC078	NAC domain-containing protein 78 isoform X1 [Brassica napus]
MSTRG.11053.1	BnaA03G0015400ZS	VTE5	phytol kinase 1, chloroplastic [Brassica rapa]
MSTRG.11053.1	BnaA03G0015600ZS	CYP77A4	cytochrome P450 77A4-like [Brassica napus]
MSTRG.11053.1	BnaA03G0015700ZS	--	BnaA03g01340D [Brassica napus]
MSTRG.11053.1	BnaA03G0015900ZS	--	BnaA03g01360D [Brassica napus]
MSTRG.11068.1	BnaA03G0016400ZS	CAT6	cationic amino acid transporter 6, chloroplastic [Brassica rapa]
MSTRG.11068.1	BnaA03G0016600ZS	PCMP-H16	pentatricopeptide repeat-containing protein At5g04780, mitochondrial-like [Brassica napus]
MSTRG.11068.1	BnaA03G0016700ZS	VPS60-2	vacuolar protein sorting-associated protein 60.2 [Brassica napus]
MSTRG.11068.1	BnaA03G0016800ZS	CPK1	calcium-dependent protein kinase 1-like [Brassica napus]
MSTRG.11068.1	BnaA03G0016900ZS	gluA	lysosomal beta glucosidase-like [Brassica napus]
MSTRG.11070.1	BnaA03G0016400ZS	CAT6	cationic amino acid transporter 6, chloroplastic [Brassica rapa]
MSTRG.11070.1	BnaA03G0016500ZS	RPS17B	40S ribosomal protein S17-2 [Brassica rapa]
MSTRG.11070.1	BnaA03G0016700ZS	VPS60-2	vacuolar protein sorting-associated protein 60.2 [Brassica napus]
MSTRG.11070.1	BnaA03G0016800ZS	CPK1	calcium-dependent protein kinase 1-like [Brassica napus]
MSTRG.11070.1	BnaA03G0016900ZS	gluA	lysosomal beta glucosidase-like [Brassica napus]
MSTRG.11083.1	BnaA03G0017400ZS	LCR81	BnaA03g01560D [Brassica napus]
MSTRG.11083.1	BnaA03G0017500ZS	NAS1	nicotianamine synthase 1 [Brassica rapa]
MSTRG.11083.1	BnaA03G0017300ZS	SUVH1	histone-lysine N-methyltransferase, H3 lysine-9 specific SUVH1-like [Brassica napus]
MSTRG.11133.1	BnaA03G0022600ZS	CYCB1-2	BnaA03g01900D [Brassica napus]
MSTRG.11133.1	BnaA03G0022900ZS	SUC6	PREDICTED: sucrose transport protein SUC8-like isoform X1 [Raphanus sativus]
MSTRG.11135.1	BnaA03G0022600ZS	CYCB1-2	BnaA03g01900D [Brassica napus]
MSTRG.11135.1	BnaA03G0022700ZS	SWA1	protein SLOW WALKER 1 [Brassica napus]
MSTRG.11135.1	BnaA03G0022900ZS	SUC6	PREDICTED: sucrose transport protein SUC8-like isoform X1 [Raphanus sativus]
MSTRG.11135.1	BnaA03G0023000ZS	--	BnaA03g01940D [Brassica napus]
MSTRG.11144.1	BnaA03G0023300ZS	RPS17D	40S ribosomal protein S17-4 [Brassica napus]
MSTRG.11144.1	BnaA03G0023500ZS	SIED1	BnaC02g02040D [Brassica napus]
MSTRG.11144.1	BnaA03G0023700ZS	NHL3	NDR1/HIN1-like protein 3 [Brassica napus]
MSTRG.11144.1	BnaA03G0023900ZS	--	NC domain-containing protein-like protein [Arabidopsis thaliana]
MSTRG.11146.1	BnaA03G0023900ZS	--	NC domain-containing protein-like protein [Arabidopsis thaliana]
MSTRG.11146.1	BnaA03G0024100ZS	HSCB	iron-sulfur cluster co-chaperone protein HscB homolog [Brassica rapa]
MSTRG.11146.1	BnaA03G0024000ZS	FLA17	fasciclin-like arabinogalactan protein 17 [Brassica napus]
MSTRG.11168.1	BnaA03G0025700ZS	FTIP1	FT-interacting protein 1 [Brassica rapa]
MSTRG.11169.1	BnaA03G0025700ZS	FTIP1	FT-interacting protein 1 [Brassica rapa]
MSTRG.11169.1	MSTRG.11172	PGIP2	polygalacturonase inhibitory protein [Brassica napus]
MSTRG.11169.2	BnaA03G0025700ZS	FTIP1	FT-interacting protein 1 [Brassica rapa]
MSTRG.11169.2	MSTRG.11172	PGIP2	polygalacturonase inhibitory protein [Brassica napus]
MSTRG.11185.1	BnaA03G0026400ZS	SNX2B	BnaA03g55530D [Brassica napus]
MSTRG.11185.1	BnaA03G0026700ZS	ATS3B	embryo-specific protein ATS3B [Brassica rapa]
MSTRG.11185.1	BnaA03G0026800ZS	GA20OX3	gibberellin 20 oxidase 3 [Brassica napus]
MSTRG.11192.1	BnaA03G0027200ZS	BON2	protein BONZAI 2 [Brassica rapa]
MSTRG.11192.1	BnaA03G0027400ZS	TSN1	ribonuclease TUDOR 1 [Brassica napus]
MSTRG.11209.1	BnaA03G0029100ZS	FH20	formin-like protein 20 [Brassica rapa]
MSTRG.11209.1	BnaA03G0029300ZS	--	DUF863 domain-containing protein [Cephalotus follicularis]
MSTRG.11209.1	BnaA03G0029200ZS	FH20	formin-like protein 20 isoform X1 [Brassica napus]
MSTRG.11219.1	BnaA03G0030000ZS	DGK1	diacylglycerol kinase 1-like [Brassica napus]
MSTRG.11219.1	BnaA03G0030300ZS	--	AT5g08050/F13G24_250 [Arabidopsis thaliana]
MSTRG.11227.1	BnaA03G0031100ZS	STK16	BnaAnng25480D [Brassica napus]
MSTRG.11227.1	BnaA03G0031200ZS	AIH	BnaAnng25490D [Brassica napus]
MSTRG.11227.1	BnaA03G0031400ZS	--	peptidoglycan-binding LysM domain-containing protein [Arabidopsis thaliana]
MSTRG.11227.1	BnaA03G0031500ZS	At5g23160	transmembrane protein [Arabidopsis thaliana]
MSTRG.11229.1	BnaA03G0031200ZS	AIH	BnaAnng25490D [Brassica napus]
MSTRG.11229.1	BnaA03G0031300ZS	At5g08180	H/ACA ribonucleoprotein complex subunit 2-like protein [Brassica rapa]
MSTRG.11229.1	BnaA03G0031400ZS	--	peptidoglycan-binding LysM domain-containing protein [Arabidopsis thaliana]
MSTRG.11229.1	BnaA03G0031700ZS	HEMC	porphobilinogen deaminase, chloroplastic-like [Brassica napus]
MSTRG.11263.1	BnaA03G0034200ZS	WDR26	WD repeat-containing protein 26-like [Brassica napus]
MSTRG.11263.1	BnaA03G0034500ZS	At5g08565	transcription elongation factor SPT4 homolog 1 [Brassica rapa]
MSTRG.11263.1	BnaA03G0034300ZS	TPR1	topless-related protein 1-like [Brassica napus]
MSTRG.11293.1	BnaA03G0037300ZS	ACT7	actin-7 [Brassica rapa]
MSTRG.11293.1	BnaA03G0037500ZS	MED26C	probable mediator of RNA polymerase II transcription subunit 26c isoform X1 [Brassica napus]
MSTRG.11293.1	BnaA03G0037800ZS	CESA5	cellulose synthase A catalytic subunit 5 [UDP-forming] isoform X1 [Brassica napus]
MSTRG.11310.1	BnaA03G0038900ZS	--	117M18_10 [Brassica rapa]
MSTRG.11315.1	BnaA03G0038900ZS	--	117M18_10 [Brassica rapa]
MSTRG.11315.1	BnaA03G0039300ZS	fabZ	117M18_14 [Brassica rapa]
MSTRG.11319.1	BnaA03G0039300ZS	fabZ	117M18_14 [Brassica rapa]
MSTRG.11319.1	BnaA03G0039500ZS	RABH1E	ras-related protein RABH1e [Brassica rapa]
MSTRG.11361.1	BnaA03G0043100ZS	--	mitochondrial inner membrane protease subunit 1-like [Brassica napus]
MSTRG.11362.1	BnaA03G0043100ZS	--	mitochondrial inner membrane protease subunit 1-like [Brassica napus]
MSTRG.11427.1	BnaA03G0047500ZS	COG8	conserved oligomeric Golgi complex subunit 8 [Brassica rapa]
MSTRG.11427.1	BnaA03G0047700ZS	NLP3	omega-amidase, chloroplastic [Brassica napus]
MSTRG.11427.1	BnaA03G0047800ZS	At5g12050	protein BIG GRAIN 1-like D [Brassica napus]
MSTRG.11449.1	MSTRG.11450	CYPRO1	aspartic proteinase oryzasin-1-like [Brassica napus]
MSTRG.11449.1	BnaA03G0049200ZS	--	transferring glycosyl group transferase [Arabidopsis thaliana]
MSTRG.11500.1	MSTRG.11501	GH3.12	4-substituted benzoates-glutamate ligase GH3.12 [Brassica rapa]
MSTRG.11500.1	BnaA03G0053100ZS	ERF113	ethylene-responsive transcription factor ERF113 [Brassica rapa]
MSTRG.11502.1	MSTRG.11501	GH3.12	4-substituted benzoates-glutamate ligase GH3.12 [Brassica rapa]
MSTRG.11502.1	BnaA03G0053100ZS	ERF113	ethylene-responsive transcription factor ERF113 [Brassica rapa]
MSTRG.11524.2	BnaA03G0054700ZS	SMT1	cycloartenol-C-24-methyltransferase [Brassica rapa]
MSTRG.11570.1	BnaA03G0059300ZS	--	aldose 1-epimerase family protein [Arabidopsis thaliana]
MSTRG.11570.1	BnaA03G0059700ZS	At5g14590	isocitrate dehydrogenase [NADP], chloroplastic/mitochondrial-like [Brassica napus]
MSTRG.11590.1	BnaA03G0061100ZS	VIP2	inositol hexakisphosphate and diphosphoinositol-pentakisphosphate kinase VIP2 isoform X2 [Brassica rapa]
MSTRG.11590.1	BnaA03G0060900ZS	GMII	alpha-mannosidase 2 [Brassica rapa]
MSTRG.11600.1	BnaA03G0062000ZS	TDP1	tyrosyl-DNA phosphodiesterase 1 isoform X1 [Brassica napus]
MSTRG.11624.1	BnaA03G0064700ZS	RRT1	rhamnogalacturonan I rhamnosyltransferase 1 isoform X2 [Brassica rapa]
MSTRG.11642.1	BnaA03G0066600ZS	--	AT5g16110 [Arabidopsis thaliana]
MSTRG.11642.1	BnaA03G0066700ZS	RPS7C	40S ribosomal protein S7-3 [Brassica rapa]
MSTRG.11642.1	BnaA03G0066900ZS	BC10	glycosyltransferase BC10 isoform X1 [Brassica rapa]
MSTRG.11663.1	MSTRG.11661	--	BnaC02g06510D [Brassica napus]
MSTRG.11663.1	BnaA03G0068800ZS	--	BnaAnng40520D [Brassica napus]
MSTRG.11663.1	BnaA03G0068900ZS	COG1	conserved oligomeric Golgi complex subunit 1-like [Brassica napus]
MSTRG.11663.1	BnaA03G0069000ZS	TRAPPC8	trafficking protein particle complex subunit 8-like [Brassica napus]
MSTRG.11690.1	BnaA03G0071300ZS	MYB93	transcription factor MYB41 [Brassica rapa]
MSTRG.11740.1	BnaA03G0075300ZS	MYB56	transcription factor MYB56 [Brassica rapa]
MSTRG.11753.1	BnaA03G0076500ZS	At3g03920	H/ACA ribonucleoprotein complex subunit 1-like protein 2 [Brassica napus]
MSTRG.11753.1	BnaA03G0084300ZS	Pxmp2	protein sym-1 [Brassica napus]
MSTRG.11753.1	BnaA03G0084400ZS	DTC	mitochondrial dicarboxylate/tricarboxylate transporter DTC [Brassica rapa]
MSTRG.11823.1	BnaA03G0083800ZS	ROPGEF10	rop guanine nucleotide exchange factor 10-like [Brassica napus]
MSTRG.11823.1	BnaA03G0083900ZS	SULTR3;5	probable sulfate transporter 3.5 [Brassica napus]
MSTRG.11847.1	BnaA03G0085700ZS	GFT1	GDP-fucose transporter 1 [Brassica rapa]
MSTRG.11863.1	BnaA03G0086500ZS	MPC1	PREDICTED: mitochondrial pyruvate carrier 1 [Brassica oleracea var. oleracea] [Brassica oleracea]
MSTRG.11863.1	BnaA03G0086800ZS	--	sulfate adenylyltransferase subunit [Arabidopsis thaliana]
MSTRG.11863.1	BnaA03G0086900ZS	SPX1	SPX domain-containing protein 1-like [Brassica napus]
MSTRG.11863.1	BnaA03G0087300ZS	rpmJ	Ribosomal protein L36 [Arabidopsis thaliana]
MSTRG.11863.1	BnaA03G0087400ZS	--	BnaCnng36200D [Brassica napus]
MSTRG.11873.2	BnaA03G0087900ZS	RPS8A	40S ribosomal protein S8-1 [Brassica napus]
MSTRG.11873.2	BnaA03G0088100ZS	PAT24	protein S-acyltransferase 24-like [Brassica napus]
MSTRG.11873.2	MSTRG.11876	TAO1	disease resistance protein TAO1 isoform X1 [Brassica rapa]
MSTRG.11884.1	BnaA03G0089300ZS	RBX1A	RING-box protein 1a [Brassica rapa]
MSTRG.11891.2	BnaA03G0089400ZS	FIP1	protein FIP1 isoform X1 [Brassica rapa]
MSTRG.11891.2	BnaA03G0089500ZS	GER3	germin-like protein subfamily 3 member 3 [Brassica napus]
MSTRG.11891.2	BnaA03G0089700ZS	COPT5	copper transporter 5-like, partial [Brassica napus]
MSTRG.11895.1	BnaA03G0090000ZS	CPN20	20 kDa chaperonin, chloroplastic-like [Brassica napus]
MSTRG.11981.1	MSTRG.11978	--	BnaAnng34030D [Brassica napus]
MSTRG.11981.1	BnaA03G0098800ZS	AAK6	adenylate kinase isoenzyme 6 homolog [Brassica napus]
MSTRG.11981.1	BnaA03G0098900ZS	ALEU	thiol protease aleurain-like [Brassica napus]
MSTRG.12005.1	BnaA03G0100600ZS	At5g59870	probable histone H2A.7 [Brassica napus]
MSTRG.12005.1	BnaA03G0100800ZS	ZAT12	zinc finger protein ZAT12 [Brassica rapa]
MSTRG.12028.1	BnaA03G0102700ZS	CYCT1-1	cyclin T1;1 [Arabidopsis thaliana]
MSTRG.12029.1	BnaA03G0102700ZS	CYCT1-1	cyclin T1;1 [Arabidopsis thaliana]
MSTRG.12060.1	BnaA03G0105700ZS	At5g39865	Glutaredoxin family protein [Arabidopsis thaliana]
MSTRG.12060.1	BnaA03G0105800ZS	STY46	tyrosine-protein kinase HTK16-like [Brassica napus]
MSTRG.12109.1	BnaA03G0110100ZS	--	BnaC03g12770D [Brassica napus]
MSTRG.12124.1	BnaA03G0111900ZS	At5g57480	AAA-ATPase At5g57480-like [Brassica napus]
MSTRG.12124.1	BnaA03G0112200ZS	ssx2ip-a	afadin- and alpha-actinin-binding protein [Brassica rapa]
MSTRG.12188.1	BnaA03G0116600ZS	NIT2	nitrilase 2 [Brassica napus]
MSTRG.12196.1	BnaA03G0116900ZS	SIRP1	E3 ubiquitin-protein ligase SIRP1-like [Brassica napus]
MSTRG.12196.1	BnaA03G0117000ZS	PCMP-E13	pentatricopeptide repeat-containing protein At5g56310-like [Brassica napus]
MSTRG.12197.1	BnaA03G0116900ZS	SIRP1	E3 ubiquitin-protein ligase SIRP1-like [Brassica napus]
MSTRG.12197.1	BnaA03G0117000ZS	PCMP-E13	pentatricopeptide repeat-containing protein At5g56310-like [Brassica napus]
MSTRG.12197.2	BnaA03G0116900ZS	SIRP1	E3 ubiquitin-protein ligase SIRP1-like [Brassica napus]
MSTRG.12197.2	BnaA03G0117000ZS	PCMP-E13	pentatricopeptide repeat-containing protein At5g56310-like [Brassica napus]
MSTRG.12201.1	BnaA03G0117000ZS	PCMP-E13	pentatricopeptide repeat-containing protein At5g56310-like [Brassica napus]
MSTRG.12201.1	BnaA03G0117300ZS	PEX5	peroxisome biogenesis protein 5 [Brassica rapa]
MSTRG.12248.4	BnaA03G0121400ZS	--	BnaA03g11410D [Brassica napus]
MSTRG.12248.4	BnaA03G0121500ZS	--	BnaA03g11420D [Brassica napus]
MSTRG.12248.4	BnaA03G0121700ZS	AT2	probable long-chain-alcohol O-fatty-acyltransferase 2 [Brassica napus]
MSTRG.12371.1	BnaA03G0130300ZS	--	leucine-rich repeat extensin-like protein 5 [Brassica rapa]
MSTRG.12371.1	BnaA03G0130400ZS	At5g53320	probable inactive receptor kinase At5g53320 [Brassica napus]
MSTRG.12371.2	BnaA03G0130300ZS	--	leucine-rich repeat extensin-like protein 5 [Brassica rapa]
MSTRG.12371.2	BnaA03G0130400ZS	At5g53320	probable inactive receptor kinase At5g53320 [Brassica napus]
MSTRG.12419.1	BnaA03G0135000ZS	LTI65	low-temperature-induced 65 kDa protein-like isoform X1 [Brassica rapa]
MSTRG.12421.1	BnaA03G0135000ZS	LTI65	low-temperature-induced 65 kDa protein-like isoform X1 [Brassica rapa]
MSTRG.12469.1	BnaA03G0139600ZS	PME59	probable pectinesterase/pectinesterase inhibitor 59 [Brassica napus]
MSTRG.12469.1	BnaA03G0139700ZS	SKS2	monocopper oxidase-like protein SKS2 [Brassica rapa]
MSTRG.12476.1	BnaA03G0140400ZS	CERK	ceramide kinase-like [Brassica napus]
MSTRG.12476.1	MSTRG.12478	EMF2	polycomb group protein EMBRYONIC FLOWER 2-like [Brassica napus]
MSTRG.12529.1	BnaA03G0144000ZS	NDA2	internal alternative NAD(P)H-ubiquinone oxidoreductase A2, mitochondrial [Brassica napus]
MSTRG.12529.1	BnaA03G0144200ZS	DREB1B	dehydration-responsive element-binding protein 1B [Brassica napus]
MSTRG.12532.3	BnaA03G0144500ZS	At2g30020	probable protein phosphatase 2C 25 [Brassica rapa]
MSTRG.12544.1	MSTRG.12543	UGT87A2	UDP-glycosyltransferase 87A2-like [Brassica napus]
MSTRG.12557.1	BnaA03G0146500ZS	EPFL6	EPIDERMAL PATTERNING FACTOR-like protein 6 isoform X2 [Brassica napus]
MSTRG.12557.1	BnaA03G0146700ZS	OFP2	transcription repressor OFP2-like [Brassica napus]
MSTRG.12561.1	BnaA03G0146700ZS	OFP2	transcription repressor OFP2-like [Brassica napus]
MSTRG.12561.1	BnaA03G0147100ZS	MEKK1	mitogen-activated protein kinase kinase kinase ANP1-like [Brassica napus]
MSTRG.12561.2	BnaA03G0146700ZS	OFP2	transcription repressor OFP2-like [Brassica napus]
MSTRG.12561.2	BnaA03G0147100ZS	MEKK1	mitogen-activated protein kinase kinase kinase ANP1-like [Brassica napus]
MSTRG.12574.1	BnaA03G0148500ZS	PTI12	PTI1-like tyrosine-protein kinase 2 [Brassica napus]
MSTRG.12615.1	BnaA03G0152400ZS	GPX2	probable glutathione peroxidase 2 [Brassica napus]
MSTRG.12615.1	BnaA03G0152800ZS	REM15.15	B3 domain-containing protein REM14 isoform X1 [Brassica rapa]
MSTRG.12628.1	MSTRG.12629	--	BnaC03g65670D [Brassica napus]
MSTRG.12655.1	BnaA03G0156000ZS	MYB101	BnaAnng27960D [Brassica napus]
MSTRG.12660.1	BnaA03G0156500ZS	At2g32630	pentatricopeptide repeat-containing protein At2g32630 [Brassica napus]
MSTRG.12662.1	BnaA03G0156900ZS	LUH	transcriptional corepressor LEUNIG_HOMOLOG isoform X2 [Brassica napus]
MSTRG.12701.1	BnaA03G0160800ZS	--	BnaA05g10210D [Brassica napus]
MSTRG.12701.1	BnaA03G0160900ZS	PXG3	probable peroxygenase 3 [Brassica napus]
MSTRG.12709.1	BnaA03G0161700ZS	--	cysteine-rich and transmembrane domain-containing protein 1 [Brassica rapa]
MSTRG.12711.1	BnaA03G0162000ZS	AHL10	AT-hook motif nuclear-localized protein 10-like [Brassica napus]
MSTRG.12734.1	BnaA03G0164100ZS	TBL37	protein trichome birefringence-like 37 [Brassica napus]
MSTRG.12742.1	BnaA03G0165000ZS	RRP12	RRP12-like protein [Brassica napus]
MSTRG.12742.1	BnaA03G0165100ZS	RRP12	RRP12-like protein [Brassica napus]
MSTRG.12766.1	BnaA03G0166900ZS	WAP	WPP domain-associated protein-like [Brassica napus]
MSTRG.12766.1	BnaA03G0167300ZS	FAH1	golgin subfamily A member 3-like [Brassica napus]
MSTRG.12768.1	BnaA03G0167300ZS	FAH1	golgin subfamily A member 3-like [Brassica napus]
MSTRG.12787.1	BnaA03G0169200ZS	AHL21	AT-hook motif nuclear-localized protein 21 [Brassica rapa]
MSTRG.12821.1	BnaA03G0173500ZS	CWINV4	PREDICTED: beta-fructofuranosidase, insoluble isoenzyme CWINV4-like isoform X1 [Brassica oleracea var. oleracea] [Brassica oleracea]
MSTRG.12821.1	MSTRG.12822	--	Gag [Vitis vinifera]
MSTRG.12833.1	BnaA03G0174800ZS	GRF3	growth-regulating factor 3-like [Brassica napus]
MSTRG.12833.1	BnaA03G0174900ZS	--	BnaA03g50830D [Brassica napus]
MSTRG.12833.1	BnaA03G0174700ZS	ABCG34	ABC transporter G family member 34-like [Brassica napus]
MSTRG.12843.1	BnaA03G0175800ZS	PXC1	leucine-rich repeat receptor-like protein kinase PXC1 [Brassica rapa]
MSTRG.12843.1	BnaA03G0176000ZS	PP2A15	F-box protein PP2-A15 [Brassica rapa]
MSTRG.12854.1	BnaA03G0177000ZS	TRP4	BnaA03g16930D [Brassica napus]
MSTRG.12864.1	MSTRG.12859	At3g06240	BnaA03g16980D [Brassica napus]
MSTRG.12864.1	BnaA03G0177400ZS	ICR2	interactor of constitutive active ROPs 2, chloroplastic-like isoform X1 [Brassica napus]
MSTRG.12873.1	BnaA03G0178300ZS	At2g37230	pentatricopeptide repeat-containing protein At2g37230 [Brassica napus]
MSTRG.12873.1	BnaA03G0178100ZS	LOG3	cytokinin riboside 5'-monophosphate phosphoribohydrolase LOG3 [Brassica rapa]
MSTRG.12890.1	BnaA03G0179600ZS	--	BnaA03g17240D [Brassica napus]
MSTRG.12890.1	BnaA03G0180400ZS	SCL9	BnaA03g17340D [Brassica napus]
MSTRG.12894.1	BnaA03G0179600ZS	--	BnaA03g17240D [Brassica napus]
MSTRG.12894.1	BnaA03G0179700ZS	--	BnaA03g17260D [Brassica napus]
MSTRG.12894.1	MSTRG.12896	ATL33	RING-H2 finger protein ATL33-like [Brassica napus]
MSTRG.12906.1	BnaA03G0180900ZS	--	BnaA03g17390D [Brassica napus]
MSTRG.12906.1	MSTRG.12907	AKR4C9	BnaA03g17400D [Brassica napus]
MSTRG.12909.1	MSTRG.12907	AKR4C9	BnaA03g17400D [Brassica napus]
MSTRG.12909.1	BnaA03G0181300ZS	ATG1C	serine/threonine-protein kinase ATG1c-like isoform X1 [Brassica napus]
MSTRG.12939.1	BnaA03G0183900ZS	PYL4	abscisic acid receptor PYL4 [Brassica rapa]
MSTRG.12941.1	BnaA03G0183900ZS	PYL4	abscisic acid receptor PYL4 [Brassica rapa]
MSTRG.12941.2	BnaA03G0183900ZS	PYL4	abscisic acid receptor PYL4 [Brassica rapa]
MSTRG.12942.1	BnaA03G0183900ZS	PYL4	abscisic acid receptor PYL4 [Brassica rapa]
MSTRG.12945.2	BnaA03G0184200ZS	DTX44	protein DETOXIFICATION 44, chloroplastic-like [Brassica napus]
MSTRG.12945.1	BnaA03G0184200ZS	DTX44	protein DETOXIFICATION 44, chloroplastic-like [Brassica napus]
MSTRG.12956.2	BnaA03G0185300ZS	ARALYDRAFT_321547	CASP-like protein 4B1 [Brassica napus]
MSTRG.12966.1	BnaA03G0186100ZS	At2g38610	BnaA03g17930D [Brassica napus]
MSTRG.12966.1	BnaA03G0186200ZS	CDKB1-2	cyclin-dependent kinase B1-2 [Brassica napus]
MSTRG.12989.1	BnaA03G0187800ZS	NUF2	probable kinetochore protein NUF2 [Brassica napus]
MSTRG.12989.1	BnaA03G0188000ZS	PICBP	calmodulin binding protein PICBP [Brassica rapa]
MSTRG.12989.1	MSTRG.12987	At2g38810	probable histone H2A variant 2 [Brassica rapa]
MSTRG.12989.1	BnaA03G0188100ZS	--	BnaA03g18150D [Brassica napus]
MSTRG.13011.1	BnaA03G0190000ZS	EULS3	ricin B-like lectin EULS3 isoform X1 [Brassica napus]
MSTRG.13011.1	BnaA03G0190200ZS	--	BnaA03g18360D [Brassica napus]
MSTRG.13012.1	BnaA03G0190000ZS	EULS3	ricin B-like lectin EULS3 isoform X1 [Brassica napus]
MSTRG.13012.1	BnaA03G0190200ZS	--	BnaA03g18360D [Brassica napus]
MSTRG.13011.2	BnaA03G0190000ZS	EULS3	ricin B-like lectin EULS3 isoform X1 [Brassica napus]
MSTRG.13011.2	BnaA03G0190200ZS	--	BnaA03g18360D [Brassica napus]
MSTRG.13017.1	BnaA03G0190200ZS	--	BnaA03g18360D [Brassica napus]
MSTRG.13017.1	BnaA03G0190300ZS	--	BLOC-1-related complex subunit 8 homolog [Brassica napus]
MSTRG.13024.1	BnaA03G0190800ZS	MLO12	MLO-like protein 12 isoform X1 [Brassica rapa]
MSTRG.13042.1	BnaA03G0192900ZS	ABCB6	ABC transporter B family member 6-like [Brassica napus]
MSTRG.13042.1	BnaA03G0193100ZS	ALG5	dolichyl-phosphate beta-glucosyltransferase-like [Brassica napus]
MSTRG.13050.1	BnaA03G0193800ZS	RCA	ribulose bisphosphate carboxylase/oxygenase activase, chloroplastic isoform X1 [Brassica rapa]
MSTRG.13090.1	BnaA03G0197400ZS	ABI4	ethylene-responsive transcription factor ABI4-like [Brassica napus]
MSTRG.13097.1	BnaA03G0198000ZS	PYL6	abscisic acid receptor PYL6 [Brassica rapa]
MSTRG.13097.2	BnaA03G0198000ZS	PYL6	abscisic acid receptor PYL6 [Brassica rapa]
MSTRG.13141.1	BnaA03G0202300ZS	At3g28850	BnaC03g23300D [Brassica napus]
MSTRG.13141.3	BnaA03G0202300ZS	At3g28850	BnaC03g23300D [Brassica napus]
MSTRG.13162.1	BnaA03G0204100ZS	NTAQ1	BnaA03g19600D [Brassica napus]
MSTRG.13162.1	BnaA03G0204700ZS	AGP23	arabinogalactan protein 23-like [Brassica rapa]
MSTRG.13212.1	BnaA03G0209100ZS	NPG1	protein NPG1 [Brassica rapa]
MSTRG.13212.1	BnaA03G0209300ZS	SSU1	3-isopropylmalate dehydratase small subunit 3 [Brassica rapa]
MSTRG.13233.1	BnaA03G0211600ZS	NLP8	protein NLP8-like isoform X3 [Brassica napus]
MSTRG.13233.1	BnaA03G0212000ZS	At2g43580	endochitinase At2g43580 isoform X1 [Brassica rapa]
MSTRG.13250.1	BnaA03G0212900ZS	FAB2	stearoyl-[acyl-carrier-protein] 9-desaturase, chloroplastic [Brassica napus]
MSTRG.13250.1	BnaA03G0213400ZS	MPK6	mitogen-activated protein kinase 6-like isoform X1 [Brassica napus]
MSTRG.13258.1	BnaA03G0213600ZS	FH2	formin-like protein 2 [Brassica rapa]
MSTRG.13258.1	BnaA03G0213800ZS	UGT74F2	UDP-glycosyltransferase 74F2 [Brassica rapa]
MSTRG.13304.1	BnaA03G0218600ZS	CYCU2-1	cyclin-U2-1 [Brassica rapa]
MSTRG.13305.1	BnaA03G0218600ZS	CYCU2-1	cyclin-U2-1 [Brassica rapa]
MSTRG.13305.1	MSTRG.13303	GATA2	BnaA04g26030D [Brassica napus]
MSTRG.13306.1	BnaA03G0218600ZS	CYCU2-1	cyclin-U2-1 [Brassica rapa]
MSTRG.13306.1	BnaA03G0218700ZS	EXPB4	expansin-B4 [Brassica rapa]
MSTRG.13306.1	MSTRG.13303	GATA2	BnaA04g26030D [Brassica napus]
MSTRG.13317.1	BnaA03G0219800ZS	SAUR36	auxin-responsive protein SAUR36 [Brassica napus]
MSTRG.13317.1	BnaA03G0219900ZS	PME17	probable pectinesterase/pectinesterase inhibitor 17 [Brassica rapa]
MSTRG.13320.1	BnaA03G0219700ZS	GOS12	Golgi SNAP receptor complex member 1-2-like isoform X1 [Brassica napus]
MSTRG.13320.1	BnaA03G0219800ZS	SAUR36	auxin-responsive protein SAUR36 [Brassica napus]
MSTRG.13320.1	BnaA03G0220000ZS	GIL1	protein GRAVITROPIC IN THE LIGHT 1-like [Brassica napus]
MSTRG.13372.1	BnaA03G0225600ZS	KIC	calcium-binding protein KIC [Brassica napus]
MSTRG.13372.1	BnaA03G0225800ZS	MTP1	metal tolerance protein 1 isoform X1 [Brassica napus]
MSTRG.13372.1	BnaA03G0225900ZS	At2g46850	probably inactive receptor-like protein kinase At2g46850 [Brassica rapa]
MSTRG.13408.1	BnaA03G0228700ZS	BGLU3	beta-glucosidase 3-like isoform X1 [Brassica napus]
MSTRG.13408.1	MSTRG.13409	--	dehydrodolichyl diphosphate synthase 2-like [Brassica napus]
MSTRG.13408.1	MSTRG.13410	--	meiosis-specific protein ASY2-like [Brassica napus]
MSTRG.13429.2	BnaA03G0230500ZS	SMR10	cyclin-dependent protein kinase inhibitor SMR10 [Brassica rapa]
MSTRG.13440.1	BnaA03G0232100ZS	At3g25440	uncharacterized CRM domain-containing protein At3g25440, chloroplastic [Brassica rapa]
MSTRG.13439.2	BnaA03G0232100ZS	At3g25440	uncharacterized CRM domain-containing protein At3g25440, chloroplastic [Brassica rapa]
MSTRG.13441.2	BnaA03G0232100ZS	At3g25440	uncharacterized CRM domain-containing protein At3g25440, chloroplastic [Brassica rapa]
MSTRG.13441.2	BnaA03G0232300ZS	MON1	vacuolar fusion protein MON1 homolog [Brassica napus]
MSTRG.13452.1	BnaA03G0233500ZS	FD3	ferredoxin, root R-B2 [Brassica rapa]
MSTRG.13452.1	BnaA03G0233600ZS	At2g27500	glucan endo-1,3-beta-glucosidase 14 isoform X1 [Brassica napus]
MSTRG.13453.1	BnaA03G0233500ZS	FD3	ferredoxin, root R-B2 [Brassica rapa]
MSTRG.13453.1	BnaA03G0233600ZS	At2g27500	glucan endo-1,3-beta-glucosidase 14 isoform X1 [Brassica napus]
MSTRG.13454.1	BnaA03G0233500ZS	FD3	ferredoxin, root R-B2 [Brassica rapa]
MSTRG.13454.1	BnaA03G0233600ZS	At2g27500	glucan endo-1,3-beta-glucosidase 14 isoform X1 [Brassica napus]
MSTRG.13460.1	BnaA03G0233600ZS	At2g27500	glucan endo-1,3-beta-glucosidase 14 isoform X1 [Brassica napus]
MSTRG.13460.1	BnaA03G0233900ZS	--	U-box domain-containing protein 6-like isoform X1 [Brassica napus]
MSTRG.13460.1	BnaA03G0234000ZS	--	glycine-rich cell wall structural protein 1.0-like [Brassica napus]
MSTRG.13462.1	BnaA03G0233600ZS	At2g27500	glucan endo-1,3-beta-glucosidase 14 isoform X1 [Brassica napus]
MSTRG.13462.1	BnaA03G0234000ZS	--	glycine-rich cell wall structural protein 1.0-like [Brassica napus]
MSTRG.13462.1	BnaA03G0234100ZS	--	glycine-rich protein 3 short isoform-like [Brassica napus]
MSTRG.13462.1	MSTRG.13466	--	hypothetical protein BRARA_H00288 [Brassica rapa]
MSTRG.13464.1	BnaA03G0233900ZS	--	U-box domain-containing protein 6-like isoform X1 [Brassica napus]
MSTRG.13464.1	BnaA03G0234100ZS	--	glycine-rich protein 3 short isoform-like [Brassica napus]
MSTRG.13464.1	MSTRG.13466	--	hypothetical protein BRARA_H00288 [Brassica rapa]
MSTRG.13467.1	BnaA03G0233900ZS	--	U-box domain-containing protein 6-like isoform X1 [Brassica napus]
MSTRG.13467.1	BnaA03G0234000ZS	--	glycine-rich cell wall structural protein 1.0-like [Brassica napus]
MSTRG.13467.1	BnaA03G0234100ZS	--	glycine-rich protein 3 short isoform-like [Brassica napus]
MSTRG.13468.1	BnaA03G0233900ZS	--	U-box domain-containing protein 6-like isoform X1 [Brassica napus]
MSTRG.13468.1	BnaA03G0234000ZS	--	glycine-rich cell wall structural protein 1.0-like [Brassica napus]
MSTRG.13468.1	BnaA03G0234100ZS	--	glycine-rich protein 3 short isoform-like [Brassica napus]
MSTRG.13468.1	MSTRG.13466	--	hypothetical protein BRARA_H00288 [Brassica rapa]
MSTRG.13485.1	BnaA03G0236100ZS	CSN2	COP9 signalosome complex subunit 2-like [Brassica napus]
MSTRG.13485.1	BnaA03G0236200ZS	At5g58784	dehydrodolichyl diphosphate synthase 5 [Brassica napus]
MSTRG.13490.1	BnaA03G0236700ZS	At1g32860	glucan endo-1,3-beta-glucosidase 11-like [Brassica napus]
MSTRG.13491.1	BnaA03G0236700ZS	At1g32860	glucan endo-1,3-beta-glucosidase 11-like [Brassica napus]
MSTRG.13493.1	BnaA03G0236700ZS	At1g32860	glucan endo-1,3-beta-glucosidase 11-like [Brassica napus]
MSTRG.13495.1	BnaA03G0237000ZS	SPX2	SPX domain-containing protein 2 [Brassica napus]
MSTRG.13532.2	BnaA03G0240500ZS	At2g23200	PREDICTED: probable receptor-like protein kinase At2g23200 [Brassica oleracea var. oleracea] [Brassica oleracea]
MSTRG.13532.2	BnaA03G0240600ZS	At2g23200	PREDICTED: probable receptor-like protein kinase At2g23200 [Brassica oleracea var. oleracea] [Brassica oleracea]
MSTRG.13532.2	BnaA03G0241000ZS	GRF1	growth-regulating factor 1 [Brassica rapa]
MSTRG.13544.1	BnaA03G0241800ZS	mcm10	protein MCM10 homolog [Brassica rapa]
MSTRG.13544.1	BnaA03G0241900ZS	--	serine/arginine repetitive matrix protein 1 isoform X1 [Brassica rapa]
MSTRG.13544.1	BnaA03G0242100ZS	--	protein CHAPERONE-LIKE PROTEIN OF POR1, chloroplastic [Brassica rapa]
MSTRG.13544.1	BnaA03G0242200ZS	--	late embryogenesis abundant protein [Arabidopsis thaliana]
MSTRG.13547.3	BnaA03G0242200ZS	--	late embryogenesis abundant protein [Arabidopsis thaliana]
MSTRG.13547.3	BnaA03G0242400ZS	AVT3B	BnaA03g56990D [Brassica napus]
MSTRG.13547.3	BnaA03G0242500ZS	At5g49770	probable leucine-rich repeat receptor-like protein kinase At5g49770 [Brassica rapa]
MSTRG.13552.1	BnaA03G0242700ZS	AHL17	AT-hook motif nuclear-localized protein 17 isoform X2 [Brassica napus]
MSTRG.13552.1	BnaA03G0242800ZS	KOR	endoglucanase 25 [Brassica rapa]
MSTRG.13552.1	BnaA03G0242600ZS	At5g49770	probable leucine-rich repeat receptor-like protein kinase At5g49770 isoform X2 [Brassica rapa]
MSTRG.13554.1	BnaA03G0242800ZS	KOR	endoglucanase 25 [Brassica rapa]
MSTRG.13554.1	BnaA03G0242600ZS	At5g49770	probable leucine-rich repeat receptor-like protein kinase At5g49770 isoform X2 [Brassica rapa]
MSTRG.13598.1	MSTRG.13596	RGP4	probable UDP-arabinopyranose mutase 4 isoform X2 [Brassica napus]
MSTRG.13598.1	MSTRG.13597	RGP4	probable UDP-arabinopyranose mutase 4 isoform X1 [Brassica napus]
MSTRG.13598.1	MSTRG.13600	MES4	BnaC03g27920D [Brassica napus]
MSTRG.13598.1	MSTRG.13602	MES19	MES4 [Arabidopsis thaliana]
MSTRG.13601.1	MSTRG.13596	RGP4	probable UDP-arabinopyranose mutase 4 isoform X2 [Brassica napus]
MSTRG.13601.1	MSTRG.13597	RGP4	probable UDP-arabinopyranose mutase 4 isoform X1 [Brassica napus]
MSTRG.13601.1	BnaA03G0246200ZS	--	auxin-responsive protein SAUR71 [Brassica napus]
MSTRG.13601.1	MSTRG.13602	MES19	MES4 [Arabidopsis thaliana]
MSTRG.13601.1	BnaA03G0246500ZS	PCN	U3 small nucleolar RNA-associated protein 4-like [Brassica napus]
MSTRG.13601.2	MSTRG.13596	RGP4	probable UDP-arabinopyranose mutase 4 isoform X2 [Brassica napus]
MSTRG.13601.2	MSTRG.13597	RGP4	probable UDP-arabinopyranose mutase 4 isoform X1 [Brassica napus]
MSTRG.13601.2	BnaA03G0246200ZS	--	auxin-responsive protein SAUR71 [Brassica napus]
MSTRG.13601.2	MSTRG.13602	MES19	MES4 [Arabidopsis thaliana]
MSTRG.13601.2	BnaA03G0246500ZS	PCN	U3 small nucleolar RNA-associated protein 4-like [Brassica napus]
MSTRG.13603.1	MSTRG.13596	RGP4	probable UDP-arabinopyranose mutase 4 isoform X2 [Brassica napus]
MSTRG.13603.1	MSTRG.13597	RGP4	probable UDP-arabinopyranose mutase 4 isoform X1 [Brassica napus]
MSTRG.13603.1	BnaA03G0246200ZS	--	auxin-responsive protein SAUR71 [Brassica napus]
MSTRG.13603.1	MSTRG.13600	MES4	BnaC03g27920D [Brassica napus]
MSTRG.13603.1	BnaA03G0246500ZS	PCN	U3 small nucleolar RNA-associated protein 4-like [Brassica napus]
MSTRG.13604.1	MSTRG.13596	RGP4	probable UDP-arabinopyranose mutase 4 isoform X2 [Brassica napus]
MSTRG.13604.1	MSTRG.13597	RGP4	probable UDP-arabinopyranose mutase 4 isoform X1 [Brassica napus]
MSTRG.13604.1	BnaA03G0246200ZS	--	auxin-responsive protein SAUR71 [Brassica napus]
MSTRG.13604.1	MSTRG.13600	MES4	BnaC03g27920D [Brassica napus]
MSTRG.13604.1	MSTRG.13602	MES19	MES4 [Arabidopsis thaliana]
MSTRG.13604.1	BnaA03G0246500ZS	PCN	U3 small nucleolar RNA-associated protein 4-like [Brassica napus]
MSTRG.13624.1	BnaA03G0248500ZS	MGS1	pollen-specific protein C13 [Brassica napus]
MSTRG.13624.1	BnaA03G0248600ZS	SPCC23B6.04c	random slug protein 5 [Brassica napus]
MSTRG.13624.1	BnaA03G0248700ZS	--	calcium ion binding protein [Arabidopsis thaliana]
MSTRG.13631.1	BnaA03G0249000ZS	ARGAH1	arginase 1, mitochondrial isoform X1 [Brassica napus]
MSTRG.13631.1	BnaA03G0249300ZS	FBW2	F-box protein FBW2 [Brassica napus]
MSTRG.13648.1	BnaA03G0249800ZS	At4g38940	F-box/kelch-repeat protein At4g38940 [Brassica rapa]
MSTRG.13648.1	BnaA03G0249900ZS	At4g38940	F-box/kelch-repeat protein At4g38940-like [Brassica napus]
MSTRG.13648.1	BnaA03G0250000ZS	--	classical arabinogalactan protein 10-like [Brassica napus]
MSTRG.13648.1	MSTRG.13649	--	PREDICTED: verprolin-like, partial [Raphanus sativus]
MSTRG.13648.1	BnaA03G0250100ZS	CPL5	RNA polymerase II C-terminal domain phosphatase-like 5 [Brassica rapa]
MSTRG.13648.1	BnaA03G0250200ZS	--	tropomyosin-2-like isoform X2 [Brassica napus]
MSTRG.13648.1	BnaA03G0249700ZS	ISA3	isoamylase 3, chloroplastic-like [Brassica napus]
MSTRG.13650.1	BnaA03G0249900ZS	At4g38940	F-box/kelch-repeat protein At4g38940-like [Brassica napus]
MSTRG.13650.1	BnaA03G0250000ZS	--	classical arabinogalactan protein 10-like [Brassica napus]
MSTRG.13650.1	MSTRG.13649	--	PREDICTED: verprolin-like, partial [Raphanus sativus]
MSTRG.13650.1	BnaA03G0250100ZS	CPL5	RNA polymerase II C-terminal domain phosphatase-like 5 [Brassica rapa]
MSTRG.13650.1	BnaA03G0250200ZS	--	tropomyosin-2-like isoform X2 [Brassica napus]
MSTRG.13667.1	BnaA03G0251300ZS	RMR4	receptor homology region, transmembrane domain- and RING domain-containing protein 4 [Brassica napus]
MSTRG.13667.1	BnaA03G0251500ZS	GASA3	gibberellin-regulated protein 3 isoform X1 [Brassica napus]
MSTRG.13667.1	BnaA03G0251600ZS	--	Mitochondrial transcription termination factor family protein [Arabidopsis thaliana]
MSTRG.13695.1	BnaA03G0253100ZS	HSD5	11-beta-hydroxysteroid dehydrogenase-like 5 [Brassica napus]
MSTRG.13695.1	BnaA03G0253200ZS	--	protein ABHD11-like isoform X1 [Brassica napus]
MSTRG.13695.1	BnaA03G0253500ZS	PHYL1.1	phytolongin Phyl1.1-like [Brassica napus]
MSTRG.13699.1	BnaA03G0253500ZS	PHYL1.1	phytolongin Phyl1.1-like [Brassica napus]
MSTRG.13734.1	BnaA03G0257000ZS	SKIP19	F-box protein SKIP19-like [Brassica napus]
MSTRG.13734.1	BnaA03G0257100ZS	--	BnaA02g21920D [Brassica napus]
MSTRG.13741.1	BnaA03G0257700ZS	RHA1B	E3 ubiquitin-protein ligase RHA1B [Brassica napus]
MSTRG.13745.1	BnaA03G0257900ZS	CRK31	kinase family protein [Arabidopsis lyrata subsp. lyrata] [Arabidopsis lyrata]
MSTRG.13745.1	BnaA03G0258100ZS	--	PREDICTED: hepatoma-derived growth factor-related protein 2 isoform X1 [Camelina sativa]
MSTRG.13752.1	BnaA03G0258700ZS	SGR2	protein STAY-GREEN 2, chloroplastic-like [Brassica napus]
MSTRG.13752.1	BnaA03G0258800ZS	FZR1	protein FIZZY-RELATED 1-like [Brassica napus]
MSTRG.13754.1	BnaA03G0258800ZS	FZR1	protein FIZZY-RELATED 1-like [Brassica napus]
MSTRG.13754.1	BnaA03G0258900ZS	PGRL1B	PGR5-like protein 1B, chloroplastic [Brassica rapa]
MSTRG.13780.1	BnaA03G0261100ZS	snu13	NHP2-like protein 1 [Brassica rapa]
MSTRG.13780.1	BnaA03G0261200ZS	RAP74	LOW QUALITY PROTEIN: transcription initiation factor IIF subunit alpha-like [Brassica napus]
MSTRG.13783.1	BnaA03G0261000ZS	--	pectinesterase inhibitor-like [Brassica napus]
MSTRG.13783.1	BnaA03G0261100ZS	snu13	NHP2-like protein 1 [Brassica rapa]
MSTRG.13783.1	BnaA03G0261200ZS	RAP74	LOW QUALITY PROTEIN: transcription initiation factor IIF subunit alpha-like [Brassica napus]
MSTRG.13783.1	MSTRG.13785	--	BnaAnng23550D [Brassica napus]
MSTRG.13784.1	BnaA03G0261100ZS	snu13	NHP2-like protein 1 [Brassica rapa]
MSTRG.13784.1	BnaA03G0261200ZS	RAP74	LOW QUALITY PROTEIN: transcription initiation factor IIF subunit alpha-like [Brassica napus]
MSTRG.13784.1	MSTRG.13785	--	BnaAnng23550D [Brassica napus]
MSTRG.13784.1	BnaA03G0261500ZS	PAP1	plastid lipid-associated protein 1, chloroplastic [Brassica napus]
MSTRG.13801.1	BnaA03G0262400ZS	APA3	aspartic proteinase A3 [Brassica napus]
MSTRG.13801.2	BnaA03G0262400ZS	APA3	aspartic proteinase A3 [Brassica napus]
MSTRG.13801.3	BnaA03G0262400ZS	APA3	aspartic proteinase A3 [Brassica napus]
MSTRG.13805.1	BnaA03G0263200ZS	ATPC1	ATP synthase gamma chain 1, chloroplastic [Brassica rapa]
MSTRG.13821.1	BnaA03G0264100ZS	At4g05010	F-box protein At4g05010-like [Brassica napus]
MSTRG.13821.1	BnaA03G0264300ZS	--	Wound-responsive family protein [Arabidopsis thaliana]
MSTRG.13821.1	BnaA03G0264400ZS	AGD13	probable ADP-ribosylation factor GTPase-activating protein AGD13 [Brassica napus]
MSTRG.13821.1	BnaA03G0264500ZS	YAO	U3 snoRNP-associated protein-like YAO [Brassica napus]
MSTRG.13826.1	BnaA03G0265200ZS	TPC1	two pore calcium channel protein 1-like [Brassica napus]
MSTRG.13836.1	BnaA03G0266500ZS	GLCAT14A	BnaC03g30210D [Brassica napus]
MSTRG.13836.1	BnaA03G0266700ZS	petC	cytochrome b6-f complex iron-sulfur subunit, chloroplastic [Brassica rapa]
MSTRG.13836.1	BnaA03G0266800ZS	--	BnaC03g30240D [Brassica napus]
MSTRG.13836.1	BnaA03G0266900ZS	FH	frataxin, mitochondrial [Brassica napus]
MSTRG.13876.1	MSTRG.13874	At4g02580	NADH dehydrogenase [ubiquinone] flavoprotein 2, mitochondrial-like [Brassica napus]
MSTRG.13876.1	BnaA03G0270500ZS	GSTF3	glutathione S-transferase F3-like [Brassica napus]
MSTRG.13876.1	BnaA03G0270700ZS	XXT2	xyloglucan 6-xylosyltransferase 2-like [Brassica napus]
MSTRG.13930.1	BnaA03G0274900ZS	--	Polyketide cyclase / dehydrase and lipid transport protein [Arabidopsis thaliana]
MSTRG.13930.1	BnaA03G0275100ZS	--	serine protease inhibitor, Kazal-type family protein [Arabidopsis thaliana]
MSTRG.13940.1	BnaA03G0275900ZS	--	unnamed protein product [Brassica rapa]
MSTRG.13940.1	BnaA03G0276100ZS	IQD1	protein IQ-DOMAIN 1-like [Brassica napus]
MSTRG.14026.2	MSTRG.14023	Rv2228c	BnaCnng72290D, partial [Brassica napus]
MSTRG.14026.2	BnaA03G0284000ZS	HIR3	hypersensitive-induced response protein 3 [Brassica rapa]
MSTRG.14123.1	BnaA03G0292300ZS	At3g03770	probable inactive leucine-rich repeat receptor-like protein kinase At3g03770 [Brassica rapa]
MSTRG.14124.1	BnaA03G0292300ZS	At3g03770	probable inactive leucine-rich repeat receptor-like protein kinase At3g03770 [Brassica rapa]
MSTRG.14167.2	BnaA03G0296200ZS	HEL	hevein-like preproprotein [Brassica rapa]
MSTRG.14167.2	BnaA03G0296400ZS	NEK2	serine/threonine-protein kinase Nek2 [Brassica rapa]
MSTRG.14214.1	BnaA03G0300500ZS	--	BnaA05g31450D [Brassica napus]
MSTRG.14214.1	BnaA03G0300700ZS	RCI2A	hydrophobic protein RCI2A [Brassica rapa]
MSTRG.14215.1	BnaA03G0300500ZS	--	BnaA05g31450D [Brassica napus]
MSTRG.14219.1	BnaA03G0301200ZS	CCT3	T-complex protein 1 subunit gamma [Brassica rapa]
MSTRG.14219.1	MSTRG.14222	VICTR	protein VARIATION IN COMPOUND TRIGGERED ROOT growth response-like [Brassica napus]
MSTRG.14244.1	BnaA03G0304200ZS	GAL1	PREDICTED: galactokinase [Brassica oleracea var. oleracea] [Brassica oleracea]
MSTRG.14249.1	BnaA03G0304600ZS	SUD1	probable E3 ubiquitin ligase SUD1 [Brassica napus]
MSTRG.14263.1	BnaA03G0305900ZS	--	Transducin/WD40 repeat-like superfamily protein [Arabidopsis thaliana]
MSTRG.14263.1	BnaA03G0305800ZS	--	PREDICTED: uncharacterized serine-rich protein C215.13-like [Raphanus sativus]
MSTRG.14265.1	BnaA03G0305900ZS	--	Transducin/WD40 repeat-like superfamily protein [Arabidopsis thaliana]
MSTRG.14265.1	BnaA03G0305800ZS	--	PREDICTED: uncharacterized serine-rich protein C215.13-like [Raphanus sativus]
MSTRG.14274.1	BnaA03G0306600ZS	UGT80A2	sterol 3-beta-glucosyltransferase UGT80A2 [Brassica rapa]
MSTRG.14274.2	BnaA03G0306600ZS	UGT80A2	sterol 3-beta-glucosyltransferase UGT80A2 [Brassica rapa]
MSTRG.14283.1	BnaA03G0307500ZS	CALS9	callose synthase 9 [Brassica rapa]
MSTRG.14287.1	BnaA03G0307500ZS	CALS9	callose synthase 9 [Brassica rapa]
MSTRG.14287.1	BnaA03G0307800ZS	AFP3	ninja-family protein 6 [Brassica rapa]
MSTRG.14287.1	BnaA03G0307900ZS	--	BnaA04g16960D [Brassica napus]
MSTRG.14287.1	BnaA03G0308000ZS	--	myb-like protein X isoform X1 [Brassica napus]
MSTRG.14287.1	BnaA03G0308100ZS	A6	probable glucan endo-1,3-beta-glucosidase A6 [Brassica rapa]
MSTRG.14326.1	BnaA03G0312100ZS	MKRN	E3 ubiquitin-protein ligase makorin [Brassica rapa]
MSTRG.14339.1	BnaA03G0312700ZS	--	trihelix transcription factor GTL1-like [Brassica napus]
MSTRG.14346.1	BnaA03G0313600ZS	--	BnaC03g35880D [Brassica napus]
MSTRG.14346.1	BnaA03G0313400ZS	At3g09800	BnaC03g35830D [Brassica napus]
MSTRG.14352.1	MSTRG.14353	PAE5	pectin acetylesterase 5-like isoform X1 [Brassica napus]
MSTRG.14354.2	BnaA03G0314200ZS	PLL3	probable protein phosphatase 2C 36 [Brassica napus]
MSTRG.14363.1	MSTRG.14364	BGLU23	beta-glucosidase 23 [Brassica rapa]
MSTRG.14379.1	BnaA03G0316300ZS	kap113	importin-11 [Brassica rapa]
MSTRG.14379.1	BnaA03G0316400ZS	HCC1	protein SCO1 homolog 1, mitochondrial [Brassica napus]
MSTRG.14379.1	BnaA03G0316500ZS	At3g08930	LIMR family protein At3g08930 isoform X2 [Brassica rapa]
MSTRG.14383.1	BnaA03G0316900ZS	RAPTOR1	BnaAnng24320D [Brassica napus]
MSTRG.14384.1	BnaA03G0316900ZS	RAPTOR1	BnaAnng24320D [Brassica napus]
MSTRG.14386.1	BnaA03G0317300ZS	LTP6	non-specific lipid-transfer protein 6 [Brassica rapa]
MSTRG.14386.1	BnaA03G0316900ZS	RAPTOR1	BnaAnng24320D [Brassica napus]
MSTRG.14412.1	MSTRG.14409	SCPL49	serine carboxypeptidase-like 49 [Brassica rapa]
MSTRG.14412.1	BnaA03G0319100ZS	NAC050	NAC domain-containing protein 53-like isoform X1 [Brassica napus]
MSTRG.14412.1	BnaA03G0318600ZS	--	vacuolar acid trehalase [Arabidopsis thaliana]
MSTRG.14454.1	BnaA03G0322800ZS	PIRL9	plant intracellular Ras-group-related LRR protein 9-like [Brassica napus]
MSTRG.14454.1	BnaA03G0323100ZS	eif3g	eukaryotic translation initiation factor 3 subunit G [Brassica rapa]
MSTRG.14454.1	BnaA03G0323200ZS	--	BnaA05g27650D [Brassica napus]
MSTRG.14538.1	BnaA03G0330200ZS	nop56	nucleolar protein 56-like [Brassica napus]
MSTRG.14543.1	BnaA03G0330700ZS	--	uncharacterized serine-rich protein C215.13 [Brassica napus]
MSTRG.14556.1	BnaA03G0331800ZS	ABCC3	ABC transporter C family member 3-like isoform X1 [Brassica napus]
MSTRG.14617.1	MSTRG.14618	Tf2-11	disease resistance protein [Brassica rapa subsp. pekinensis] [Brassica rapa]
MSTRG.14619.1	MSTRG.14618	Tf2-11	disease resistance protein [Brassica rapa subsp. pekinensis] [Brassica rapa]
MSTRG.14639.1	MSTRG.14634	CYP72A15	cytochrome P450 72A15 [Brassica rapa]
MSTRG.14639.1	MSTRG.14635	CYP72A15	cytochrome P450 72A15-like [Brassica napus]
MSTRG.14639.1	MSTRG.14638	CYP72A14	cytochrome P450 72A13-like [Brassica rapa]
MSTRG.14639.1	BnaA03G0338900ZS	MSL5	mechanosensitive ion channel protein 5 isoform X1 [Brassica napus]
MSTRG.14641.1	BnaA03G0338900ZS	MSL5	mechanosensitive ion channel protein 5 isoform X1 [Brassica napus]
MSTRG.14642.1	BnaA03G0338900ZS	MSL5	mechanosensitive ion channel protein 5 isoform X1 [Brassica napus]
MSTRG.14685.1	BnaA03G0341800ZS	NAC055	NAC domain-containing protein 55 [Brassica rapa]
MSTRG.14685.1	BnaA03G0341900ZS	NAC055	LOW QUALITY PROTEIN: NAC domain-containing protein 55 [Brassica napus]
MSTRG.14685.2	BnaA03G0341800ZS	NAC055	NAC domain-containing protein 55 [Brassica rapa]
MSTRG.14685.2	BnaA03G0341900ZS	NAC055	LOW QUALITY PROTEIN: NAC domain-containing protein 55 [Brassica napus]
MSTRG.14691.1	BnaA03G0342100ZS	RPT3	coleoptile phototropism protein 1-like [Brassica napus]
MSTRG.14743.1	BnaA03G0348700ZS	--	cell wall / vacuolar inhibitor of fructosidase 1-like [Brassica napus]
MSTRG.14743.1	MSTRG.14746	Os03g0733400	zinc finger BED domain-containing protein RICESLEEPER 2-like [Brassica napus]
MSTRG.14754.1	BnaA03G0349600ZS	CRSH	probable GTP diphosphokinase CRSH, chloroplastic [Brassica rapa]
MSTRG.14754.1	BnaA03G0349700ZS	CIPK1	CBL-interacting serine/threonine-protein kinase 1-like isoform X1 [Brassica napus]
MSTRG.14758.1	BnaA03G0349600ZS	CRSH	probable GTP diphosphokinase CRSH, chloroplastic [Brassica rapa]
MSTRG.14758.1	BnaA03G0349700ZS	CIPK1	CBL-interacting serine/threonine-protein kinase 1-like isoform X1 [Brassica napus]
MSTRG.14758.1	BnaA03G0349800ZS	--	late embryogenesis abundant protein D-29 [Brassica napus]
MSTRG.14806.1	BnaA03G0354600ZS	MKS1	protein MKS1-like [Brassica napus]
MSTRG.14806.1	BnaA03G0354500ZS	pyrH	uridylate kinase [Brassica rapa]
MSTRG.14811.1	BnaA03G0355000ZS	WNK6	PREDICTED: probable serine/threonine-protein kinase WNK6 [Brassica oleracea var. oleracea] [Brassica oleracea]
MSTRG.14830.1	BnaA03G0356000ZS	JGB	protein JINGUBANG [Brassica napus]
MSTRG.14830.1	BnaA03G0356100ZS	VRN1	B3 domain-containing transcription factor VRN1-like [Brassica rapa]
MSTRG.14848.1	BnaA03G0358300ZS	SN1	peamaclein-like [Brassica rapa]
MSTRG.14848.1	BnaA03G0358400ZS	NHD1	sodium/proton antiporter 1 isoform X2 [Brassica rapa]
MSTRG.14848.1	BnaA03G0358500ZS	PGDH3	D-3-phosphoglycerate dehydrogenase 3, chloroplastic [Brassica napus]
MSTRG.14849.1	BnaA03G0358400ZS	NHD1	sodium/proton antiporter 1 isoform X2 [Brassica rapa]
MSTRG.14849.1	BnaA03G0358500ZS	PGDH3	D-3-phosphoglycerate dehydrogenase 3, chloroplastic [Brassica napus]
MSTRG.14868.1	BnaA03G0360800ZS	TMEM53	transmembrane protein 53 [Brassica napus]
MSTRG.14868.2	BnaA03G0360800ZS	TMEM53	transmembrane protein 53 [Brassica napus]
MSTRG.14889.1	BnaA03G0362800ZS	--	BnaC03g41590D [Brassica napus]
MSTRG.14889.1	BnaA03G0362600ZS	UBP12	probable inactive serine/threonine-protein kinase fnkC isoform X1 [Brassica rapa]
MSTRG.14891.1	BnaA03G0362800ZS	--	BnaC03g41590D [Brassica napus]
MSTRG.14893.1	BnaA03G0362800ZS	--	BnaC03g41590D [Brassica napus]
MSTRG.14959.1	BnaA03G0369200ZS	spg1	septum-promoting GTP-binding protein 1 [Brassica napus]
MSTRG.14968.1	BnaA03G0369700ZS	UGT71B2	UDP-glycosyltransferase 71B2-like [Brassica napus]
MSTRG.14968.1	BnaA03G0369800ZS	UGT71B2	UDP-glycosyltransferase 71B2-like [Brassica napus]
MSTRG.14968.1	BnaA03G0370000ZS	PEX22	peroxisome biogenesis protein 22-like [Brassica napus]
MSTRG.14972.1	BnaA03G0370300ZS	CRRSP26	PREDICTED: cysteine-rich repeat secretory protein 26-like [Brassica oleracea var. oleracea] [Brassica oleracea]
MSTRG.14972.2	BnaA03G0370300ZS	CRRSP26	PREDICTED: cysteine-rich repeat secretory protein 26-like [Brassica oleracea var. oleracea] [Brassica oleracea]
MSTRG.14975.1	BnaA03G0370300ZS	CRRSP26	PREDICTED: cysteine-rich repeat secretory protein 26-like [Brassica oleracea var. oleracea] [Brassica oleracea]
MSTRG.14975.1	BnaA03G0370500ZS	TPRP-F1	36.4 kDa proline-rich protein-like [Brassica napus]
MSTRG.14982.1	BnaA03G0371600ZS	RPS10	40S ribosomal protein S10, mitochondrial-like [Brassica napus]
MSTRG.14999.1	BnaA03G0372500ZS	--	BnaC03g42850D [Brassica napus]
MSTRG.14999.1	BnaA03G0372600ZS	--	BnaC03g42870D [Brassica napus]
MSTRG.15011.1	BnaA03G0374300ZS	APS1	ATP sulfurylase 1, chloroplastic [Brassica rapa]
MSTRG.15014.1	BnaA03G0374300ZS	APS1	ATP sulfurylase 1, chloroplastic [Brassica rapa]
MSTRG.15014.1	MSTRG.15019	--	BnaA09g05740D [Brassica napus]
MSTRG.15014.1	BnaA03G0374700ZS	PKP1	plastidial pyruvate kinase 1, chloroplastic [Brassica rapa]
MSTRG.15020.1	BnaA03G0374800ZS	--	BnaC05g29490D [Brassica napus]
MSTRG.15025.1	BnaA03G0375000ZS	IAA2	auxin-responsive protein IAA2-like [Brassica rapa]
MSTRG.15025.1	BnaA03G0375100ZS	IAA7	auxin-responsive protein IAA7 [Brassica rapa]
MSTRG.15059.1	BnaA03G0379300ZS	SYP32	PREDICTED: syntaxin-32-like [Brassica oleracea var. oleracea] [Brassica oleracea]
MSTRG.15079.1	MSTRG.15080	--	BnaA08g11660D [Brassica napus]
MSTRG.15079.1	BnaA03G0380800ZS	ABI3	B3 domain-containing transcription factor ABI3 [Brassica napus]
MSTRG.15082.1	MSTRG.15080	--	BnaA08g11660D [Brassica napus]
MSTRG.15093.1	BnaA03G0382100ZS	BGLU3	PREDICTED: beta-glucosidase 3-like [Raphanus sativus]
MSTRG.15106.1	BnaA03G0382700ZS	At1g75040	BnaAnng19350D [Brassica napus]
MSTRG.15106.1	BnaA03G0382800ZS	LACS8	long chain acyl-CoA synthetase 8-like [Brassica napus]
MSTRG.15153.1	BnaA03G0385800ZS	At2g04740	BTB/POZ domain-containing protein At2g04740 [Brassica napus]
MSTRG.15153.1	BnaA03G0385900ZS	FLA7	PREDICTED: fasciclin-like arabinogalactan protein 7 [Brassica oleracea var. oleracea] [Brassica oleracea]
MSTRG.15153.1	MSTRG.15156	--	BnaC03g44140D [Brassica napus]
MSTRG.15163.1	BnaA03G0386300ZS	At2g04850	cytochrome b561 and DOMON domain-containing protein At2g04850 [Brassica rapa]
MSTRG.15172.1	BnaA03G0387500ZS	Dnajc14	DNAJ heat shock N-terminal domain-containing protein [Arabidopsis thaliana]
MSTRG.15172.1	BnaA03G0387600ZS	GNT2	alpha-1,6-mannosyl-glycoprotein 2-beta-N-acetylglucosaminyltransferase [Brassica rapa]
MSTRG.15208.1	MSTRG.15207	RLM1A	calmodulin-like protein 12 [Brassica napus]
MSTRG.15211.1	BnaA03G0391500ZS	--	leucine-rich repeat extensin-like protein 5 [Brassica rapa]
MSTRG.15238.1	BnaA03G0393900ZS	GASA7	gibberellin-regulated protein 7 [Brassica napus]
MSTRG.15238.2	BnaA03G0393900ZS	GASA7	gibberellin-regulated protein 7 [Brassica napus]
MSTRG.15247.1	BnaA03G0394500ZS	RFI2	E3 ubiquitin-protein ligase RFI2 [Eutrema salsugineum]
MSTRG.15247.1	BnaA03G0394600ZS	DIR6	dirigent protein 6-like [Brassica napus]
MSTRG.15254.2	BnaA03G0395200ZS	PAB2	polyadenylate-binding protein 2 isoform X1 [Brassica rapa]
MSTRG.15257.3	BnaA03G0395200ZS	PAB2	polyadenylate-binding protein 2 isoform X1 [Brassica rapa]
MSTRG.15271.1	BnaA03G0396200ZS	PEX3	pollen-specific leucine-rich repeat extensin-like protein 3 [Brassica rapa]
MSTRG.15311.1	BnaA03G0399800ZS	BZIP23	basic leucine zipper 23-like [Brassica napus]
MSTRG.15349.1	BnaA03G0403900ZS	--	NAD-dependent protein deacetylase HST1 [Arabidopsis lyrata subsp. lyrata] [Arabidopsis lyrata]
MSTRG.15349.1	BnaA03G0404000ZS	DOF5.4	dof zinc finger protein DOF5.4 [Brassica napus]
MSTRG.15350.1	BnaA03G0403900ZS	--	NAD-dependent protein deacetylase HST1 [Arabidopsis lyrata subsp. lyrata] [Arabidopsis lyrata]
MSTRG.15350.1	BnaA03G0404000ZS	DOF5.4	dof zinc finger protein DOF5.4 [Brassica napus]
MSTRG.15514.1	BnaA03G0421700ZS	--	prosaposin-like [Brassica napus]
MSTRG.15514.1	BnaA03G0422000ZS	ETO1	ethylene-overproduction protein 1-like isoform X1 [Brassica napus]
MSTRG.15514.1	MSTRG.15520	--	uncharacterized protein LOC103874058 isoform X1 [Brassica rapa]
MSTRG.15544.1	MSTRG.15541	--	BnaC07g32700D [Brassica napus]
MSTRG.15566.2	BnaA03G0426400ZS	--	BnaA03g58010D [Brassica napus]
MSTRG.15566.2	MSTRG.15565	--	UDP-glycosyltransferase 71B5-like [Brassica napus]
MSTRG.15566.2	BnaA03G0426600ZS	BIA1	BAHD acyltransferase BIA1-like [Brassica napus]
MSTRG.15566.3	BnaA03G0426400ZS	--	BnaA03g58010D [Brassica napus]
MSTRG.15566.3	MSTRG.15565	--	UDP-glycosyltransferase 71B5-like [Brassica napus]
MSTRG.15566.3	BnaA03G0426600ZS	BIA1	BAHD acyltransferase BIA1-like [Brassica napus]
MSTRG.15571.1	MSTRG.15570	--	Disease resistance protein CC-NBS-LRR class family [Prunus dulcis]
MSTRG.15571.1	BnaA03G0426900ZS	PUX5	plant UBX domain-containing protein 5-like [Brassica napus]
MSTRG.15571.1	BnaA03G0426800ZS	CYP708A2	cytochrome P450 708A2-like [Brassica napus]
MSTRG.15608.1	MSTRG.15612	--	uncharacterized protein LOC111214246 [Brassica napus]
MSTRG.15608.1	BnaA03G0430800ZS	ephA	epoxide hydrolase A [Brassica rapa]
MSTRG.15608.1	BnaA03G0430900ZS	--	BnaA07g02280D [Brassica napus]
MSTRG.15609.1	MSTRG.15612	--	uncharacterized protein LOC111214246 [Brassica napus]
MSTRG.15609.1	BnaA03G0430800ZS	ephA	epoxide hydrolase A [Brassica rapa]
MSTRG.15609.1	BnaA03G0430900ZS	--	BnaA07g02280D [Brassica napus]
MSTRG.15637.1	BnaA03G0432600ZS	RD19C	probable cysteine protease RD19C [Brassica napus]
MSTRG.15637.1	BnaA03G0432700ZS	SPH2	S-protein homolog 2 [Brassica rapa]
MSTRG.15637.1	BnaA03G0432800ZS	ECHIA	probable enoyl-CoA hydratase 1, peroxisomal [Brassica napus]
MSTRG.15637.1	BnaA03G0433000ZS	At4g16230	GDSL esterase/lipase At4g16230 [Brassica rapa]
MSTRG.15644.1	BnaA03G0433400ZS	--	pollen-specific leucine-rich repeat extensin-like protein 1 isoform X1 [Brassica napus]
MSTRG.15644.1	BnaA03G0433600ZS	--	transmembrane protein [Arabidopsis thaliana]
MSTRG.15644.1	BnaA03G0433900ZS	ARALYDRAFT_915107	CASP-like protein 2B1 [Brassica napus]
MSTRG.15644.1	BnaA03G0433700ZS	ADA2B	transcriptional adapter ADA2b-like isoform X2 [Brassica napus]
MSTRG.15686.1	BnaA03G0438600ZS	--	unnamed protein product, partial [Brassica oleracea]
MSTRG.15706.2	BnaA03G0439900ZS	VAB	VAN3-binding protein [Brassica rapa]
MSTRG.15706.2	BnaA03G0440400ZS	KUA1	transcription factor KUA1 isoform X1 [Brassica rapa]
MSTRG.15706.2	BnaA03G0439700ZS	LDHA	L-lactate dehydrogenase B [Brassica rapa]
MSTRG.15709.1	BnaA03G0440400ZS	KUA1	transcription factor KUA1 isoform X1 [Brassica rapa]
MSTRG.15709.1	BnaA03G0440500ZS	--	BnaC07g34320D [Brassica napus]
MSTRG.15723.1	BnaA03G0441500ZS	At4g17616	pentatricopeptide repeat-containing protein At4g17616-like isoform X1 [Brassica napus]
MSTRG.15723.1	BnaA03G0441700ZS	CKB2	casein kinase II subunit beta-2 isoform X1 [Brassica rapa]
MSTRG.15749.1	BnaA03G0443900ZS	--	PLATZ transcription factor family protein [Arabidopsis thaliana]
MSTRG.15749.1	BnaA03G0443700ZS	UBP20	ubiquitin carboxyl-terminal hydrolase 20-like [Brassica napus]
MSTRG.15759.1	BnaA03G0444700ZS	APRR2	two-component response regulator-like APRR2 [Brassica rapa]
MSTRG.15759.1	BnaA03G0444800ZS	--	BnaA10g08720D [Brassica napus]
MSTRG.15786.1	BnaA03G0447500ZS	--	E3 ubiquitin-protein ligase RNF19B [Brassica rapa]
MSTRG.15786.1	BnaA03G0447600ZS	COG4	conserved oligomeric Golgi complex subunit 4-like [Brassica napus]
MSTRG.15786.1	BnaA03G0447400ZS	TCP2	transcription factor TCP2 [Brassica rapa]
MSTRG.15790.1	BnaA03G0447500ZS	--	E3 ubiquitin-protein ligase RNF19B [Brassica rapa]
MSTRG.15790.1	BnaA03G0447600ZS	COG4	conserved oligomeric Golgi complex subunit 4-like [Brassica napus]
MSTRG.15811.1	BnaA03G0450800ZS	HSFA4A	heat stress transcription factor A-4a-like [Brassica napus]
MSTRG.15825.1	MSTRG.15822	AXR1	NEDD8-activating enzyme E1 regulatory subunit AXR1-like isoform X1 [Brassica napus]
MSTRG.15825.1	BnaA03G0452500ZS	ERD3	probable methyltransferase PMT21 [Brassica napus]
MSTRG.15858.1	BnaA03G0456400ZS	CYP71A13	cytochrome P450 71A16 [Brassica rapa]
MSTRG.15858.1	BnaA03G0456600ZS	TPS26	BnaA08g30440D [Brassica napus]
MSTRG.15858.1	BnaA03G0456700ZS	TPS15	terpene cyclase like protein [Arabidopsis thaliana]
MSTRG.15858.1	BnaA03G0456800ZS	TPS07	PREDICTED: LOW QUALITY PROTEIN: terpenoid synthase 26-like [Raphanus sativus]
MSTRG.15873.1	BnaA03G0458200ZS	At4g20830	berberine bridge enzyme-like 19 [Brassica napus]
MSTRG.15886.1	MSTRG.15883	--	BnaA08g31450D [Brassica napus]
MSTRG.15886.1	BnaA03G0459300ZS	DOF4.4	dof zinc finger protein DOF4.4-like [Brassica napus]
MSTRG.15886.1	BnaA03G0459500ZS	Os01g0857700	protein BUD31 homolog 1-like [Brassica napus]
MSTRG.15886.1	BnaA03G0459600ZS	CAT1	cationic amino acid transporter 1 [Brassica napus]
MSTRG.15886.1	BnaA03G0459700ZS	RPN2	dolichyl-diphosphooligosaccharide--protein glycosyltransferase subunit 2-like [Brassica napus]
MSTRG.15899.3	BnaA03G0460400ZS	CRK29	cysteine-rich receptor-like protein kinase 29 isoform X1 [Brassica napus]
MSTRG.15900.1	BnaA03G0460400ZS	CRK29	cysteine-rich receptor-like protein kinase 29 isoform X1 [Brassica napus]
MSTRG.15900.1	BnaA03G0460500ZS	JMJ25	lysine-specific demethylase JMJ25-like isoform X2 [Brassica napus]
MSTRG.15914.2	BnaA03G0462100ZS	--	transmembrane protein [Arabidopsis thaliana]
MSTRG.15922.1	BnaA03G0462800ZS	MSRB2	peptide methionine sulfoxide reductase B5 [Brassica rapa]
MSTRG.15928.1	BnaA03G0463200ZS	DTX38	protein DETOXIFICATION 38 [Brassica rapa]
MSTRG.15939.1	MSTRG.15938	At1g69090	F-box protein At1g69090 [Brassica rapa]
MSTRG.15943.1	BnaA03G0464500ZS	PGC	cathepsin D isoform X1 [Brassica rapa]
MSTRG.15943.2	BnaA03G0464500ZS	PGC	cathepsin D isoform X1 [Brassica rapa]
MSTRG.15944.1	BnaA03G0464500ZS	PGC	cathepsin D isoform X1 [Brassica rapa]
MSTRG.15962.1	BnaA03G0466100ZS	ACER	alkaline ceramidase [Brassica rapa]
MSTRG.15971.1	BnaA03G0467400ZS	CYP93A1	cytochrome P450 71A1-like [Brassica napus]
MSTRG.15974.1	BnaA03G0468000ZS	PAT13	probable protein S-acyltransferase 13 [Brassica napus]
MSTRG.15977.1	BnaA03G0467900ZS	--	BnaCnng47240D [Brassica napus]
MSTRG.15977.1	BnaA03G0468300ZS	AHL2	AT-hook motif nuclear-localized protein 2 [Brassica rapa]
MSTRG.15977.1	BnaA03G0468000ZS	PAT13	probable protein S-acyltransferase 13 [Brassica napus]
MSTRG.15977.1	BnaA03G0468400ZS	ACR7	ACT domain-containing protein ACR7-like isoform X1 [Brassica napus]
MSTRG.15991.1	BnaA03G0469900ZS	PYR4	dihydroorotase, mitochondrial isoform X1 [Brassica rapa]
MSTRG.15992.1	BnaA03G0469900ZS	PYR4	dihydroorotase, mitochondrial isoform X1 [Brassica rapa]
MSTRG.16008.1	BnaA03G0471400ZS	CRK17	cysteine-rich receptor-like protein kinase 17 [Brassica napus]
MSTRG.16008.1	BnaA03G0471600ZS	TIF3A1	eukaryotic translation initiation factor 3 subunit A isoform X2 [Brassica napus]
MSTRG.16017.3	BnaA03G0472200ZS	TET5	tetraspanin-5 [Brassica rapa]
MSTRG.16019.1	BnaA03G0472700ZS	--	BnaA03g58710D [Brassica napus]
MSTRG.16019.1	BnaA03G0472600ZS	--	BnaCnng42060D [Brassica napus]
MSTRG.16042.1	MSTRG.16040	GIP	Retrovirus-related Pol polyprotein from transposon TNT 1-94 [Cajanus cajan]
MSTRG.16050.1	BnaA03G0476000ZS	GSVIVT00026920001	probable polygalacturonase [Brassica rapa]
MSTRG.16060.1	BnaA03G0477100ZS	CSLG3	cellulose synthase-like protein G3 isoform X1 [Brassica napus]
MSTRG.16063.1	BnaA03G0477500ZS	TRE1	trehalase-like [Brassica rapa]
MSTRG.16077.1	BnaA03G0478800ZS	WRKY7	probable WRKY transcription factor 7 [Brassica rapa]
MSTRG.16077.1	BnaA03G0478900ZS	MLO13	MLO-like protein 13 [Brassica rapa]
MSTRG.16144.1	BnaA03G0484200ZS	At4g25140	oleosin 18.5 kDa [Brassica napus]
MSTRG.16169.1	BnaA03G0486800ZS	DREB1C	dehydration-responsive element-binding protein 1C [Brassica rapa]
MSTRG.16175.1	BnaA03G0487200ZS	MSH3	DNA mismatch repair protein MSH3 [Brassica napus]
MSTRG.16181.2	BnaA03G0487900ZS	At1g76660	BnaA03g47560D [Brassica napus]
MSTRG.16213.1	BnaA03G0491100ZS	ACS7	1-aminocyclopropane-1-carboxylate synthase 7-like [Brassica rapa]
MSTRG.16216.1	BnaA03G0491300ZS	MIOX4	inositol oxygenase 4 [Brassica rapa]
MSTRG.16216.1	BnaA03G0491400ZS	SOT3	cytosolic sulfotransferase 3 [Brassica rapa]
MSTRG.16216.1	BnaA03G0491500ZS	EMB1027	arginine--tRNA ligase, cytoplasmic-like isoform X1 [Brassica napus]
MSTRG.16238.1	BnaA03G0493700ZS	WRKY20	probable WRKY transcription factor 20 isoform X1 [Brassica napus]
MSTRG.16238.1	MSTRG.16240	GDPDL3	glycerophosphodiester phosphodiesterase GDPDL3-like [Brassica napus]
MSTRG.16238.1	BnaA03G0493800ZS	RNP1	heterogeneous nuclear ribonucleoprotein 1-like isoform X1 [Brassica napus]
MSTRG.16271.1	BnaA03G0496000ZS	RPL14B	BnaC01g19250D [Brassica napus]
MSTRG.16271.1	BnaA03G0496200ZS	At4g27130	BnaA03g48450D [Brassica napus]
MSTRG.16271.1	BnaA03G0496500ZS	AT2S3	napin-1A-like [Brassica napus]
MSTRG.16271.1	BnaA03G0496600ZS	At4g27190	disease resistance protein At4g27190-like [Brassica napus]
MSTRG.16273.1	BnaA03G0496600ZS	At4g27190	disease resistance protein At4g27190-like [Brassica napus]
MSTRG.16277.1	BnaA03G0496500ZS	AT2S3	napin-1A-like [Brassica napus]
MSTRG.16277.1	BnaA03G0496600ZS	At4g27190	disease resistance protein At4g27190-like [Brassica napus]
MSTRG.16277.1	BnaA03G0496900ZS	GH3.5	BnaA03g48550D [Brassica napus]
MSTRG.16293.1	BnaA03G0497900ZS	PORB	BnaA03g48610D [Brassica napus]
MSTRG.16293.1	BnaA03G0498300ZS	At4g27520	early nodulin-like protein 2 [Brassica napus]
MSTRG.16293.1	BnaA03G0498000ZS	GLCAT14A	beta-glucuronosyltransferase GlcAT14A-like [Brassica rapa]
MSTRG.16333.1	BnaA03G0502100ZS	--	BnaA03g49010D [Brassica napus]
MSTRG.16339.1	MSTRG.16336	ERF054	ethylene-responsive transcription factor ERF054 [Brassica rapa]
MSTRG.16339.1	BnaA03G0502600ZS	--	BnaA03g49060D [Brassica napus]
MSTRG.16339.1	BnaA03G0503200ZS	NDB1	BnaA03g49120D [Brassica napus]
MSTRG.16355.1	BnaA03G0504100ZS	At2g25060	BnaA03g49200D [Brassica napus]
MSTRG.16355.2	BnaA03G0504100ZS	At2g25060	BnaA03g49200D [Brassica napus]
MSTRG.16385.1	MSTRG.16388	--	BnaA03g59030D [Brassica napus]
MSTRG.16385.1	BnaA03G0507100ZS	mettl5	methyltransferase-like protein 5 [Brassica napus]
MSTRG.16408.1	BnaA03G0510000ZS	GGT3	glutathione hydrolase 3 [Eutrema salsugineum]
MSTRG.16411.1	BnaA03G0510000ZS	GGT3	glutathione hydrolase 3 [Eutrema salsugineum]
MSTRG.16411.1	BnaA03G0510200ZS	GGT3	gamma-glutamyltranspeptidase 3-like [Brassica napus]
MSTRG.16415.1	BnaA03G0510400ZS	NAC075	NAC domain-containing protein 75 isoform X2 [Brassica rapa]
MSTRG.16418.1	BnaA03G0510400ZS	NAC075	NAC domain-containing protein 75 isoform X2 [Brassica rapa]
MSTRG.16426.1	BnaA03G0511500ZS	JAL37	BnaA03g49590D [Brassica napus]
MSTRG.16426.1	BnaA03G0511600ZS	CDA6	cytidine deaminase 6 [Brassica rapa]
MSTRG.16426.1	BnaA03G0511700ZS	CDA1	cytidine deaminase 1-like [Brassica napus]
MSTRG.16428.1	BnaA03G0511500ZS	JAL37	BnaA03g49590D [Brassica napus]
MSTRG.16428.1	BnaA03G0511700ZS	CDA1	cytidine deaminase 1-like [Brassica napus]
MSTRG.16443.1	MSTRG.16445	--	PREDICTED: SMY2 homolog 2-like [Brassica oleracea var. oleracea] [Brassica oleracea]
MSTRG.16483.1	BnaA03G0516000ZS	PER45	peroxidase 45 [Brassica napus]
MSTRG.16483.1	BnaA03G0516200ZS	AHA2	PREDICTED: ATPase 2, plasma membrane-type-like isoform X2 [Brassica oleracea var. oleracea] [Brassica oleracea]
MSTRG.16519.1	BnaA03G0520000ZS	NRPB7	DNA-directed RNA polymerase II subunit RPB7 isoform X1 [Brassica rapa]
MSTRG.16519.2	BnaA03G0520000ZS	NRPB7	DNA-directed RNA polymerase II subunit RPB7 isoform X1 [Brassica rapa]
MSTRG.16532.1	BnaA03G0520900ZS	--	ribosomal RNA small subunit methyltransferase G [Gossypium australe]
MSTRG.16532.1	BnaA03G0521000ZS	FBL19	BnaA03g50380D [Brassica napus]
MSTRG.16539.1	BnaA03G0521600ZS	2022-08-08	AUGMIN subunit 8-like [Brassica napus]
MSTRG.16539.1	BnaA03G0521700ZS	Cbei_0202	FAD/NAD(P)-binding oxidoreductase family protein [Arabidopsis thaliana]
MSTRG.16546.1	BnaA03G0521900ZS	ATG11	autophagy-related protein 11-like [Brassica napus]
MSTRG.16560.1	BnaA03G0523400ZS	CIPK6	CBL-interacting serine/threonine-protein kinase 6-like [Brassica napus]
MSTRG.16579.2	BnaA03G0525000ZS	PBA1	proteasome subunit beta type-6-like [Brassica napus]
MSTRG.16579.2	BnaA03G0525100ZS	AIG2LC	AIG2-like protein C [Brassica napus]
MSTRG.16579.3	BnaA03G0525000ZS	PBA1	proteasome subunit beta type-6-like [Brassica napus]
MSTRG.16579.3	BnaA03G0525100ZS	AIG2LC	AIG2-like protein C [Brassica napus]
MSTRG.16579.5	BnaA03G0525000ZS	PBA1	proteasome subunit beta type-6-like [Brassica napus]
MSTRG.16579.5	BnaA03G0525100ZS	AIG2LC	AIG2-like protein C [Brassica napus]
MSTRG.16579.7	BnaA03G0525000ZS	PBA1	proteasome subunit beta type-6-like [Brassica napus]
MSTRG.16579.7	BnaA03G0525100ZS	AIG2LC	AIG2-like protein C [Brassica napus]
MSTRG.16583.1	BnaA03G0525100ZS	AIG2LC	AIG2-like protein C [Brassica napus]
MSTRG.16583.1	BnaA03G0525400ZS	--	BnaA03g51420D [Brassica napus]
MSTRG.16621.1	BnaA03G0529000ZS	GPX7	GPx [Brassica oleracea var. botrytis] [Brassica oleracea]
MSTRG.16624.1	BnaA03G0529600ZS	ARR10	BnaA03g51830D [Brassica napus]
MSTRG.16627.1	BnaA03G0529600ZS	ARR10	BnaA03g51830D [Brassica napus]
MSTRG.16627.1	BnaA03G0529900ZS	ASP5	aspartate aminotransferase, chloroplastic-like [Brassica napus]
MSTRG.16639.2	BnaA03G0530400ZS	PHOX4	protein PHOX4-like [Brassica napus]
MSTRG.16639.2	BnaA03G0530600ZS	EREL1	BnaA03g51930D [Brassica napus]
MSTRG.16688.1	BnaA03G0535500ZS	LKR/SDH	alpha-aminoadipic semialdehyde synthase-like [Brassica napus]
MSTRG.16688.1	BnaA03G0535400ZS	--	BnaA03g52360D [Brassica napus]
MSTRG.16688.2	BnaA03G0535500ZS	LKR/SDH	alpha-aminoadipic semialdehyde synthase-like [Brassica napus]
MSTRG.16688.2	BnaA03G0535400ZS	--	BnaA03g52360D [Brassica napus]
MSTRG.16691.1	BnaA03G0535500ZS	LKR/SDH	alpha-aminoadipic semialdehyde synthase-like [Brassica napus]
MSTRG.16691.1	BnaA03G0535400ZS	--	BnaA03g52360D [Brassica napus]
MSTRG.16691.2	BnaA03G0535500ZS	LKR/SDH	alpha-aminoadipic semialdehyde synthase-like [Brassica napus]
MSTRG.16691.2	BnaA03G0535400ZS	--	BnaA03g52360D [Brassica napus]
MSTRG.16704.1	BnaA03G0537000ZS	GSVIVT00026920001	probable polygalacturonase [Brassica napus]
MSTRG.16704.1	BnaA03G0537400ZS	BCA5	PREDICTED: beta carbonic anhydrase 5, chloroplastic-like [Brassica oleracea var. oleracea] [Brassica oleracea]
MSTRG.16704.1	BnaA03G0537100ZS	MYB54	transcription factor MYB105-like [Brassica napus]
MSTRG.16705.1	BnaA03G0537000ZS	GSVIVT00026920001	probable polygalacturonase [Brassica napus]
MSTRG.16705.1	BnaA03G0537400ZS	BCA5	PREDICTED: beta carbonic anhydrase 5, chloroplastic-like [Brassica oleracea var. oleracea] [Brassica oleracea]
MSTRG.16705.1	BnaA03G0537100ZS	MYB54	transcription factor MYB105-like [Brassica napus]
MSTRG.16719.1	BnaA03G0538300ZS	--	BnaA03g52650D [Brassica napus]
MSTRG.16719.1	BnaA03G0538400ZS	EX1	protein EXECUTER 1, chloroplastic-like [Brassica rapa]
MSTRG.16723.1	BnaA03G0538800ZS	At3g24610	BnaA03g52730D [Brassica napus]
MSTRG.16728.1	MSTRG.16730	SHW1	protein SHORT HYPOCOTYL IN WHITE LIGHT 1 [Brassica napus]
MSTRG.16729.1	MSTRG.16730	SHW1	protein SHORT HYPOCOTYL IN WHITE LIGHT 1 [Brassica napus]
MSTRG.16732.1	MSTRG.16730	SHW1	protein SHORT HYPOCOTYL IN WHITE LIGHT 1 [Brassica napus]
MSTRG.16732.1	BnaA03G0539300ZS	XYN5	endo-1,4-beta-xylanase 5 isoform X1 [Brassica rapa]
MSTRG.16733.1	MSTRG.16730	SHW1	protein SHORT HYPOCOTYL IN WHITE LIGHT 1 [Brassica napus]
MSTRG.16733.1	BnaA03G0539300ZS	XYN5	endo-1,4-beta-xylanase 5 isoform X1 [Brassica rapa]
MSTRG.16739.1	BnaA03G0539700ZS	RPS29A	BnaA03g50700D [Brassica napus]
MSTRG.16739.1	BnaA03G0539800ZS	DDB_G0277335	PXMP2/4 family protein 4-like [Brassica napus]
MSTRG.16748.1	BnaA03G0540900ZS	COR28	cold-regulated protein 28-like [Brassica rapa]
MSTRG.16748.1	BnaA03G0541000ZS	--	BnaA03g50800D [Brassica napus]
MSTRG.16748.1	MSTRG.16751	At1g06550	3-hydroxyisobutyryl-CoA hydrolase-like protein 5 [Brassica napus]
MSTRG.16748.1	BnaA03G0541400ZS	MCCB	BnaA03g50840D [Brassica napus]
MSTRG.16749.1	BnaA03G0540900ZS	COR28	cold-regulated protein 28-like [Brassica rapa]
MSTRG.16749.1	BnaA03G0541000ZS	--	BnaA03g50800D [Brassica napus]
MSTRG.16749.1	MSTRG.16751	At1g06550	3-hydroxyisobutyryl-CoA hydrolase-like protein 5 [Brassica napus]
MSTRG.16749.1	BnaA03G0541400ZS	MCCB	BnaA03g50840D [Brassica napus]
MSTRG.16750.1	BnaA03G0540900ZS	COR28	cold-regulated protein 28-like [Brassica rapa]
MSTRG.16750.1	BnaA03G0541000ZS	--	BnaA03g50800D [Brassica napus]
MSTRG.16750.1	MSTRG.16751	At1g06550	3-hydroxyisobutyryl-CoA hydrolase-like protein 5 [Brassica napus]
MSTRG.16750.1	BnaA03G0541400ZS	MCCB	BnaA03g50840D [Brassica napus]
[truncated: 7,997 more rows]

## Sheet: tran_diff. annot
lncRNA_id	GeneID	cor	p_value	Symbol	Description
MSTRG.34026.1	BnaA01G0000700ZS	0.957278	1.89205e-39	EXLA2	expansin-like A2 [Brassica rapa]
MSTRG.34026.1	BnaA01G0001800ZS	0.957278	1.89205e-39	EXLA2	expansin-like A2 [Brassica rapa]
MSTRG.10199.1	BnaA01G0003100ZS	0.966778	3.33739e-43	At4g39000	endoglucanase 23 [Brassica rapa]
MSTRG.10838.1	BnaA01G0003100ZS	0.978772	6.3438e-50	At4g39000	endoglucanase 23 [Brassica rapa]
MSTRG.14215.1	BnaA01G0003100ZS	0.960693	1.08515e-40	At4g39000	endoglucanase 23 [Brassica rapa]
MSTRG.15011.1	BnaA01G0003100ZS	0.952529	6.98567e-38	At4g39000	endoglucanase 23 [Brassica rapa]
MSTRG.15311.1	BnaA01G0003100ZS	0.964826	2.38297e-42	At4g39000	endoglucanase 23 [Brassica rapa]
MSTRG.16426.1	BnaA01G0003100ZS	0.98404	3.20029e-54	At4g39000	endoglucanase 23 [Brassica rapa]
MSTRG.23441.1	BnaA01G0003100ZS	0.960096	1.82144e-40	At4g39000	endoglucanase 23 [Brassica rapa]
MSTRG.2371.1	BnaA01G0003100ZS	0.950163	3.68268e-37	At4g39000	endoglucanase 23 [Brassica rapa]
MSTRG.26411.1	BnaA01G0003100ZS	0.97551	8.94169e-48	At4g39000	endoglucanase 23 [Brassica rapa]
MSTRG.27806.1	BnaA01G0003100ZS	0.960666	1.11088e-40	At4g39000	endoglucanase 23 [Brassica rapa]
MSTRG.28950.1	BnaA01G0003100ZS	0.960121	1.78279e-40	At4g39000	endoglucanase 23 [Brassica rapa]
MSTRG.30812.1	BnaA01G0003100ZS	0.956577	3.30357e-39	At4g39000	endoglucanase 23 [Brassica rapa]
MSTRG.31146.2	BnaA01G0003100ZS	0.96336	9.70353e-42	At4g39000	endoglucanase 23 [Brassica rapa]
MSTRG.33605.1	BnaA01G0003100ZS	0.951821	1.15932e-37	At4g39000	endoglucanase 23 [Brassica rapa]
MSTRG.36603.1	BnaA01G0003100ZS	0.965191	1.66386e-42	At4g39000	endoglucanase 23 [Brassica rapa]
MSTRG.37838.1	BnaA01G0003100ZS	0.970338	6.70443e-45	At4g39000	endoglucanase 23 [Brassica rapa]
MSTRG.38786.1	BnaA01G0003100ZS	0.963948	5.56309e-42	At4g39000	endoglucanase 23 [Brassica rapa]
MSTRG.40954.1	BnaA01G0003100ZS	0.952243	8.5803e-38	At4g39000	endoglucanase 23 [Brassica rapa]
MSTRG.41744.1	BnaA01G0003100ZS	0.97928	2.74021e-50	At4g39000	endoglucanase 23 [Brassica rapa]
MSTRG.41906.1	BnaA01G0003100ZS	0.964383	3.66509e-42	At4g39000	endoglucanase 23 [Brassica rapa]
MSTRG.42045.1	BnaA01G0003100ZS	0.958898	5.02716e-40	At4g39000	endoglucanase 23 [Brassica rapa]
MSTRG.44525.1	BnaA01G0003100ZS	0.950933	2.16425e-37	At4g39000	endoglucanase 23 [Brassica rapa]
MSTRG.46364.1	BnaA01G0003100ZS	0.953117	4.56301e-38	At4g39000	endoglucanase 23 [Brassica rapa]
MSTRG.46734.1	BnaA01G0003100ZS	0.97118	2.48166e-45	At4g39000	endoglucanase 23 [Brassica rapa]
MSTRG.46857.1	BnaA01G0003100ZS	0.957014	2.33655e-39	At4g39000	endoglucanase 23 [Brassica rapa]
MSTRG.4707.1	BnaA01G0003100ZS	0.950508	2.90423e-37	At4g39000	endoglucanase 23 [Brassica rapa]
MSTRG.47429.3	BnaA01G0003100ZS	0.979883	9.84995e-51	At4g39000	endoglucanase 23 [Brassica rapa]
MSTRG.48832.1	BnaA01G0003100ZS	0.962174	2.90142e-41	At4g39000	endoglucanase 23 [Brassica rapa]
MSTRG.48894.1	BnaA01G0003100ZS	0.971942	9.83899e-46	At4g39000	endoglucanase 23 [Brassica rapa]
MSTRG.48968.1	BnaA01G0003100ZS	0.95639	3.83005e-39	At4g39000	endoglucanase 23 [Brassica rapa]
MSTRG.50037.1	BnaA01G0003100ZS	0.950834	2.31806e-37	At4g39000	endoglucanase 23 [Brassica rapa]
MSTRG.53510.1	BnaA01G0003100ZS	0.967902	1.01962e-43	At4g39000	endoglucanase 23 [Brassica rapa]
MSTRG.54490.2	BnaA01G0003100ZS	0.97226	6.64204e-46	At4g39000	endoglucanase 23 [Brassica rapa]
MSTRG.55070.2	BnaA01G0003100ZS	0.966348	5.1987e-43	At4g39000	endoglucanase 23 [Brassica rapa]
MSTRG.55112.1	BnaA01G0003100ZS	0.972749	3.59477e-46	At4g39000	endoglucanase 23 [Brassica rapa]
MSTRG.55642.1	BnaA01G0003100ZS	0.954282	1.9281e-38	At4g39000	endoglucanase 23 [Brassica rapa]
MSTRG.57262.1	BnaA01G0003100ZS	0.969411	1.93883e-44	At4g39000	endoglucanase 23 [Brassica rapa]
MSTRG.59134.1	BnaA01G0003100ZS	0.954714	1.39317e-38	At4g39000	endoglucanase 23 [Brassica rapa]
MSTRG.59726.1	BnaA01G0003100ZS	0.981891	2.56692e-52	At4g39000	endoglucanase 23 [Brassica rapa]
MSTRG.6060.1	BnaA01G0003100ZS	0.962207	2.81651e-41	At4g39000	endoglucanase 23 [Brassica rapa]
MSTRG.63768.1	BnaA01G0003100ZS	0.972558	4.57081e-46	At4g39000	endoglucanase 23 [Brassica rapa]
MSTRG.67566.1	BnaA01G0003100ZS	0.974837	2.28614e-47	At4g39000	endoglucanase 23 [Brassica rapa]
MSTRG.67574.1	BnaA01G0003100ZS	0.976135	3.6573e-48	At4g39000	endoglucanase 23 [Brassica rapa]
MSTRG.69042.1	BnaA01G0003100ZS	0.960422	1.37387e-40	At4g39000	endoglucanase 23 [Brassica rapa]
MSTRG.69727.3	BnaA01G0003100ZS	0.964495	3.28781e-42	At4g39000	endoglucanase 23 [Brassica rapa]
MSTRG.71034.1	BnaA01G0003100ZS	0.952239	8.60615e-38	At4g39000	endoglucanase 23 [Brassica rapa]
MSTRG.71494.1	BnaA01G0003100ZS	0.969514	1.72501e-44	At4g39000	endoglucanase 23 [Brassica rapa]
MSTRG.71619.1	BnaA01G0003100ZS	0.968121	8.05598e-44	At4g39000	endoglucanase 23 [Brassica rapa]
MSTRG.72130.1	BnaA01G0003100ZS	0.95185	1.13523e-37	At4g39000	endoglucanase 23 [Brassica rapa]
MSTRG.72638.1	BnaA01G0003100ZS	0.965197	1.65423e-42	At4g39000	endoglucanase 23 [Brassica rapa]
MSTRG.72860.1	BnaA01G0003100ZS	0.958522	6.86993e-40	At4g39000	endoglucanase 23 [Brassica rapa]
MSTRG.75972.1	BnaA01G0003100ZS	0.993071	7.73107e-67	At4g39000	endoglucanase 23 [Brassica rapa]
MSTRG.80582.1	BnaA01G0003100ZS	0.958744	5.7112e-40	At4g39000	endoglucanase 23 [Brassica rapa]
MSTRG.81852.1	BnaA01G0003100ZS	0.988545	3.13113e-59	At4g39000	endoglucanase 23 [Brassica rapa]
MSTRG.82574.1	BnaA01G0003100ZS	0.951497	1.45778e-37	At4g39000	endoglucanase 23 [Brassica rapa]
MSTRG.83171.1	BnaA01G0003100ZS	0.964401	3.60235e-42	At4g39000	endoglucanase 23 [Brassica rapa]
MSTRG.84593.1	BnaA01G0003100ZS	0.979761	1.21538e-50	At4g39000	endoglucanase 23 [Brassica rapa]
MSTRG.85541.2	BnaA01G0003100ZS	0.970259	7.35378e-45	At4g39000	endoglucanase 23 [Brassica rapa]
MSTRG.91869.1	BnaA01G0003100ZS	0.960789	9.97814e-41	At4g39000	endoglucanase 23 [Brassica rapa]
MSTRG.92489.1	BnaA01G0003100ZS	0.958371	7.77807e-40	At4g39000	endoglucanase 23 [Brassica rapa]
MSTRG.96207.1	BnaA01G0003100ZS	0.965121	1.78305e-42	At4g39000	endoglucanase 23 [Brassica rapa]
MSTRG.97828.1	BnaA01G0003100ZS	0.975468	9.49363e-48	At4g39000	endoglucanase 23 [Brassica rapa]
MSTRG.97980.1	BnaA01G0003100ZS	0.98223	1.3319e-52	At4g39000	endoglucanase 23 [Brassica rapa]
MSTRG.98158.4	BnaA01G0003100ZS	0.953907	2.55085e-38	At4g39000	endoglucanase 23 [Brassica rapa]
MSTRG.98534.1	BnaA01G0003100ZS	0.970122	8.6112e-45	At4g39000	endoglucanase 23 [Brassica rapa]
MSTRG.98621.1	BnaA01G0003100ZS	0.969254	2.31415e-44	At4g39000	endoglucanase 23 [Brassica rapa]
MSTRG.99321.1	BnaA01G0003100ZS	0.953033	4.84979e-38	At4g39000	endoglucanase 23 [Brassica rapa]
MSTRG.99671.1	BnaA01G0003100ZS	0.965282	1.52071e-42	At4g39000	endoglucanase 23 [Brassica rapa]
MSTRG.35333.1	BnaA01G0003800ZS	0.952775	5.84792e-38	At4g39110	probable receptor-like protein kinase At4g39110 [Brassica napus]
MSTRG.44669.1	BnaA01G0003800ZS	0.952393	7.70541e-38	At4g39110	probable receptor-like protein kinase At4g39110 [Brassica napus]
MSTRG.84877.1	BnaA01G0003800ZS	0.958682	6.01538e-40	At4g39110	probable receptor-like protein kinase At4g39110 [Brassica napus]
MSTRG.86505.1	BnaA01G0003800ZS	0.950121	3.79116e-37	At4g39110	probable receptor-like protein kinase At4g39110 [Brassica napus]
MSTRG.88420.4	BnaA01G0003800ZS	0.955669	6.71311e-39	At4g39110	probable receptor-like protein kinase At4g39110 [Brassica napus]
MSTRG.1668.1	BnaA01G0011500ZS	0.952973	5.06763e-38	PCKA	phosphoenolpyruvate carboxykinase (ATP) [Brassica rapa]
MSTRG.24943.1	BnaA01G0011500ZS	0.958359	7.85365e-40	PCKA	phosphoenolpyruvate carboxykinase (ATP) [Brassica rapa]
MSTRG.34621.1	BnaA01G0011500ZS	0.954576	1.54569e-38	PCKA	phosphoenolpyruvate carboxykinase (ATP) [Brassica rapa]
MSTRG.40370.1	BnaA01G0011500ZS	0.958911	4.96894e-40	PCKA	phosphoenolpyruvate carboxykinase (ATP) [Brassica rapa]
MSTRG.74235.1	BnaA01G0011500ZS	0.965005	1.99871e-42	PCKA	phosphoenolpyruvate carboxykinase (ATP) [Brassica rapa]
MSTRG.77164.1	BnaA01G0011500ZS	0.965217	1.62164e-42	PCKA	phosphoenolpyruvate carboxykinase (ATP) [Brassica rapa]
MSTRG.77453.1	BnaA01G0011500ZS	0.955765	6.23548e-39	PCKA	phosphoenolpyruvate carboxykinase (ATP) [Brassica rapa]
MSTRG.84438.1	BnaA01G0011500ZS	0.950909	2.19983e-37	PCKA	phosphoenolpyruvate carboxykinase (ATP) [Brassica rapa]
MSTRG.40259.1	BnaA01G0012700ZS	0.954549	1.57816e-38	GRF2	growth-regulating factor 2 [Brassica rapa]
MSTRG.55028.2	BnaA01G0013600ZS	0.953915	2.53505e-38	PER50	peroxidase 50 [Brassica rapa]
MSTRG.10651.1	BnaA01G0014500ZS	0.958557	6.66981e-40	AGL66	agamous-like MADS-box protein AGL66 isoform X3 [Brassica rapa]
MSTRG.13783.1	BnaA01G0014500ZS	0.968813	3.77928e-44	AGL66	agamous-like MADS-box protein AGL66 isoform X3 [Brassica rapa]
MSTRG.16426.1	BnaA01G0014500ZS	0.951207	1.78691e-37	AGL66	agamous-like MADS-box protein AGL66 isoform X3 [Brassica rapa]
MSTRG.23441.1	BnaA01G0014500ZS	0.950302	3.34792e-37	AGL66	agamous-like MADS-box protein AGL66 isoform X3 [Brassica rapa]
MSTRG.2371.1	BnaA01G0014500ZS	0.957955	1.0944e-39	AGL66	agamous-like MADS-box protein AGL66 isoform X3 [Brassica rapa]
MSTRG.31104.2	BnaA01G0014500ZS	0.953363	3.81056e-38	AGL66	agamous-like MADS-box protein AGL66 isoform X3 [Brassica rapa]
MSTRG.31895.1	BnaA01G0014500ZS	0.970333	6.74314e-45	AGL66	agamous-like MADS-box protein AGL66 isoform X3 [Brassica rapa]
MSTRG.32319.1	BnaA01G0014500ZS	0.966877	3.01089e-43	AGL66	agamous-like MADS-box protein AGL66 isoform X3 [Brassica rapa]
MSTRG.38786.1	BnaA01G0014500ZS	0.954954	1.16149e-38	AGL66	agamous-like MADS-box protein AGL66 isoform X3 [Brassica rapa]
MSTRG.45508.2	BnaA01G0014500ZS	0.973544	1.29085e-46	AGL66	agamous-like MADS-box protein AGL66 isoform X3 [Brassica rapa]
MSTRG.45791.1	BnaA01G0014500ZS	0.961336	6.16059e-41	AGL66	agamous-like MADS-box protein AGL66 isoform X3 [Brassica rapa]
MSTRG.46696.1	BnaA01G0014500ZS	0.952443	7.43047e-38	AGL66	agamous-like MADS-box protein AGL66 isoform X3 [Brassica rapa]
MSTRG.49700.1	BnaA01G0014500ZS	0.958827	5.33209e-40	AGL66	agamous-like MADS-box protein AGL66 isoform X3 [Brassica rapa]
MSTRG.50037.1	BnaA01G0014500ZS	0.958851	5.22481e-40	AGL66	agamous-like MADS-box protein AGL66 isoform X3 [Brassica rapa]
MSTRG.51880.1	BnaA01G0014500ZS	0.9551	1.03894e-38	AGL66	agamous-like MADS-box protein AGL66 isoform X3 [Brassica rapa]
MSTRG.52502.1	BnaA01G0014500ZS	0.965218	1.62014e-42	AGL66	agamous-like MADS-box protein AGL66 isoform X3 [Brassica rapa]
MSTRG.53609.1	BnaA01G0014500ZS	0.966033	7.16065e-43	AGL66	agamous-like MADS-box protein AGL66 isoform X3 [Brassica rapa]
MSTRG.53615.1	BnaA01G0014500ZS	0.960634	1.14265e-40	AGL66	agamous-like MADS-box protein AGL66 isoform X3 [Brassica rapa]
MSTRG.57115.1	BnaA01G0014500ZS	0.956936	2.48624e-39	AGL66	agamous-like MADS-box protein AGL66 isoform X3 [Brassica rapa]
MSTRG.57280.1	BnaA01G0014500ZS	0.951494	1.46084e-37	AGL66	agamous-like MADS-box protein AGL66 isoform X3 [Brassica rapa]
MSTRG.58556.1	BnaA01G0014500ZS	0.952731	6.03905e-38	AGL66	agamous-like MADS-box protein AGL66 isoform X3 [Brassica rapa]
MSTRG.59649.1	BnaA01G0014500ZS	0.956181	4.51146e-39	AGL66	agamous-like MADS-box protein AGL66 isoform X3 [Brassica rapa]
MSTRG.60839.1	BnaA01G0014500ZS	0.981352	7.10333e-52	AGL66	agamous-like MADS-box protein AGL66 isoform X3 [Brassica rapa]
MSTRG.62117.1	BnaA01G0014500ZS	0.950393	3.14495e-37	AGL66	agamous-like MADS-box protein AGL66 isoform X3 [Brassica rapa]
MSTRG.62949.1	BnaA01G0014500ZS	0.955985	5.25578e-39	AGL66	agamous-like MADS-box protein AGL66 isoform X3 [Brassica rapa]
MSTRG.67566.1	BnaA01G0014500ZS	0.954764	1.34148e-38	AGL66	agamous-like MADS-box protein AGL66 isoform X3 [Brassica rapa]
MSTRG.67658.1	BnaA01G0014500ZS	0.967836	1.09483e-43	AGL66	agamous-like MADS-box protein AGL66 isoform X3 [Brassica rapa]
MSTRG.67873.1	BnaA01G0014500ZS	0.97518	1.42224e-47	AGL66	agamous-like MADS-box protein AGL66 isoform X3 [Brassica rapa]
MSTRG.69703.1	BnaA01G0014500ZS	0.966417	4.84094e-43	AGL66	agamous-like MADS-box protein AGL66 isoform X3 [Brassica rapa]
MSTRG.69894.1	BnaA01G0014500ZS	0.971026	2.98254e-45	AGL66	agamous-like MADS-box protein AGL66 isoform X3 [Brassica rapa]
MSTRG.70492.1	BnaA01G0014500ZS	0.99314	5.44788e-67	AGL66	agamous-like MADS-box protein AGL66 isoform X3 [Brassica rapa]
MSTRG.72860.1	BnaA01G0014500ZS	0.959318	3.53384e-40	AGL66	agamous-like MADS-box protein AGL66 isoform X3 [Brassica rapa]
MSTRG.74242.1	BnaA01G0014500ZS	0.959086	4.29218e-40	AGL66	agamous-like MADS-box protein AGL66 isoform X3 [Brassica rapa]
MSTRG.75558.1	BnaA01G0014500ZS	0.960113	1.79495e-40	AGL66	agamous-like MADS-box protein AGL66 isoform X3 [Brassica rapa]
MSTRG.77133.1	BnaA01G0014500ZS	0.961118	7.47149e-41	AGL66	agamous-like MADS-box protein AGL66 isoform X3 [Brassica rapa]
MSTRG.80369.1	BnaA01G0014500ZS	0.958861	5.18434e-40	AGL66	agamous-like MADS-box protein AGL66 isoform X3 [Brassica rapa]
MSTRG.80582.1	BnaA01G0014500ZS	0.976982	1.04764e-48	AGL66	agamous-like MADS-box protein AGL66 isoform X3 [Brassica rapa]
MSTRG.83171.1	BnaA01G0014500ZS	0.962368	2.43112e-41	AGL66	agamous-like MADS-box protein AGL66 isoform X3 [Brassica rapa]
MSTRG.87387.1	BnaA01G0014500ZS	0.973887	8.2288e-47	AGL66	agamous-like MADS-box protein AGL66 isoform X3 [Brassica rapa]
MSTRG.92662.1	BnaA01G0014500ZS	0.960109	1.8011e-40	AGL66	agamous-like MADS-box protein AGL66 isoform X3 [Brassica rapa]
MSTRG.96207.1	BnaA01G0014500ZS	0.96828	6.78221e-44	AGL66	agamous-like MADS-box protein AGL66 isoform X3 [Brassica rapa]
MSTRG.99321.1	BnaA01G0014500ZS	0.950701	2.54182e-37	AGL66	agamous-like MADS-box protein AGL66 isoform X3 [Brassica rapa]
MSTRG.13453.1	BnaA01G0014900ZS	0.951017	2.04068e-37	CYP81F4	cytochrome P450 81F1-like [Brassica rapa]
MSTRG.1668.1	BnaA01G0014900ZS	0.954826	1.2801e-38	CYP81F4	cytochrome P450 81F1-like [Brassica rapa]
MSTRG.17870.1	BnaA01G0014900ZS	0.972292	6.3831e-46	CYP81F4	cytochrome P450 81F1-like [Brassica rapa]
MSTRG.18260.2	BnaA01G0014900ZS	0.965091	1.8373e-42	CYP81F4	cytochrome P450 81F1-like [Brassica rapa]
MSTRG.18356.1	BnaA01G0014900ZS	0.964717	2.65097e-42	CYP81F4	cytochrome P450 81F1-like [Brassica rapa]
MSTRG.23842.1	BnaA01G0014900ZS	0.955464	7.86306e-39	CYP81F4	cytochrome P450 81F1-like [Brassica rapa]
MSTRG.3033.1	BnaA01G0014900ZS	0.975726	6.58351e-48	CYP81F4	cytochrome P450 81F1-like [Brassica rapa]
MSTRG.33906.1	BnaA01G0014900ZS	0.953226	4.21139e-38	CYP81F4	cytochrome P450 81F1-like [Brassica rapa]
MSTRG.34204.1	BnaA01G0014900ZS	0.959838	2.27222e-40	CYP81F4	cytochrome P450 81F1-like [Brassica rapa]
MSTRG.35312.1	BnaA01G0014900ZS	0.956101	4.8002e-39	CYP81F4	cytochrome P450 81F1-like [Brassica rapa]
MSTRG.44104.3	BnaA01G0014900ZS	0.969349	2.07896e-44	CYP81F4	cytochrome P450 81F1-like [Brassica rapa]
MSTRG.44669.1	BnaA01G0014900ZS	0.97095	3.26721e-45	CYP81F4	cytochrome P450 81F1-like [Brassica rapa]
MSTRG.5500.1	BnaA01G0014900ZS	0.973379	1.60069e-46	CYP81F4	cytochrome P450 81F1-like [Brassica rapa]
MSTRG.84877.1	BnaA01G0014900ZS	0.975655	7.28442e-48	CYP81F4	cytochrome P450 81F1-like [Brassica rapa]
MSTRG.88420.4	BnaA01G0014900ZS	0.963034	1.31651e-41	CYP81F4	cytochrome P450 81F1-like [Brassica rapa]
MSTRG.88726.1	BnaA01G0014900ZS	0.962374	2.41854e-41	CYP81F4	cytochrome P450 81F1-like [Brassica rapa]
MSTRG.99567.2	BnaA01G0014900ZS	0.979927	9.12664e-51	CYP81F4	cytochrome P450 81F1-like [Brassica rapa]
MSTRG.99567.3	BnaA01G0014900ZS	0.968548	5.06213e-44	CYP81F4	cytochrome P450 81F1-like [Brassica rapa]
MSTRG.99568.1	BnaA01G0014900ZS	0.96971	1.38118e-44	CYP81F4	cytochrome P450 81F1-like [Brassica rapa]
MSTRG.10864.1	BnaA01G0021600ZS	0.966538	4.27452e-43	GATA19	GATA transcription factor 19 [Brassica rapa]
MSTRG.46315.1	BnaA01G0021600ZS	0.962459	2.23692e-41	GATA19	GATA transcription factor 19 [Brassica rapa]
MSTRG.71677.2	BnaA01G0021600ZS	0.956908	2.54299e-39	GATA19	GATA transcription factor 19 [Brassica rapa]
MSTRG.10852.1	BnaA01G0023100ZS	0.958193	9.00189e-40	At4g36390	CDK5RAP1-like protein isoform X1 [Brassica rapa]
MSTRG.3670.1	BnaA01G0023100ZS	0.968246	7.03274e-44	At4g36390	CDK5RAP1-like protein isoform X1 [Brassica rapa]
MSTRG.16428.1	BnaA01G0025000ZS	0.951125	1.89209e-37	ALKBH9B	RNA demethylase ALKBH9B [Brassica rapa]
MSTRG.23397.1	BnaA01G0025000ZS	0.973211	1.99068e-46	ALKBH9B	RNA demethylase ALKBH9B [Brassica rapa]
MSTRG.41799.1	BnaA01G0025000ZS	0.95221	8.786e-38	ALKBH9B	RNA demethylase ALKBH9B [Brassica rapa]
MSTRG.41996.1	BnaA01G0025000ZS	0.986276	1.68775e-56	ALKBH9B	RNA demethylase ALKBH9B [Brassica rapa]
MSTRG.44743.1	BnaA01G0025000ZS	0.960967	8.53682e-41	ALKBH9B	RNA demethylase ALKBH9B [Brassica rapa]
MSTRG.50286.1	BnaA01G0025000ZS	0.950067	3.9337e-37	ALKBH9B	RNA demethylase ALKBH9B [Brassica rapa]
MSTRG.52360.1	BnaA01G0026800ZS	0.96295	1.42352e-41	ACO1	aconitate hydratase 1 [Brassica rapa]
MSTRG.1668.1	BnaA01G0032600ZS	0.959171	3.99948e-40	CAT2	catalase-2-like [Brassica napus]
MSTRG.18260.2	BnaA01G0032600ZS	0.970541	5.29234e-45	CAT2	catalase-2-like [Brassica napus]
MSTRG.19864.1	BnaA01G0032600ZS	0.955755	6.2816e-39	CAT2	catalase-2-like [Brassica napus]
MSTRG.35312.1	BnaA01G0032600ZS	0.954602	1.51634e-38	CAT2	catalase-2-like [Brassica napus]
MSTRG.40370.1	BnaA01G0032600ZS	0.972179	7.34531e-46	CAT2	catalase-2-like [Brassica napus]
MSTRG.65862.1	BnaA01G0032600ZS	0.9567	2.99951e-39	CAT2	catalase-2-like [Brassica napus]
MSTRG.74235.1	BnaA01G0032600ZS	0.973027	2.52218e-46	CAT2	catalase-2-like [Brassica napus]
MSTRG.77164.1	BnaA01G0032600ZS	0.963068	1.27545e-41	CAT2	catalase-2-like [Brassica napus]
MSTRG.77418.2	BnaA01G0032600ZS	0.973	2.60833e-46	CAT2	catalase-2-like [Brassica napus]
MSTRG.77453.1	BnaA01G0032600ZS	0.971728	1.27961e-45	CAT2	catalase-2-like [Brassica napus]
MSTRG.84438.1	BnaA01G0032600ZS	0.964694	2.71013e-42	CAT2	catalase-2-like [Brassica napus]
MSTRG.88726.1	BnaA01G0032600ZS	0.969935	1.06791e-44	CAT2	catalase-2-like [Brassica napus]
MSTRG.91202.1	BnaA01G0032600ZS	0.968572	4.92715e-44	CAT2	catalase-2-like [Brassica napus]
MSTRG.99567.2	BnaA01G0032600ZS	0.952876	5.43689e-38	CAT2	catalase-2-like [Brassica napus]
MSTRG.16426.1	BnaA01G0035400ZS	0.957205	2.00569e-39	--	auxin-responsive protein SAUR50-like [Brassica napus]
MSTRG.31104.2	BnaA01G0035400ZS	0.951665	1.29484e-37	--	auxin-responsive protein SAUR50-like [Brassica napus]
MSTRG.3255.2	BnaA01G0035400ZS	0.958476	7.13487e-40	--	auxin-responsive protein SAUR50-like [Brassica napus]
MSTRG.50037.1	BnaA01G0035400ZS	0.974577	3.26167e-47	--	auxin-responsive protein SAUR50-like [Brassica napus]
MSTRG.53609.1	BnaA01G0035400ZS	0.954928	1.18484e-38	--	auxin-responsive protein SAUR50-like [Brassica napus]
MSTRG.63768.1	BnaA01G0035400ZS	0.95916	4.03454e-40	--	auxin-responsive protein SAUR50-like [Brassica napus]
MSTRG.80582.1	BnaA01G0035400ZS	0.954844	1.26287e-38	--	auxin-responsive protein SAUR50-like [Brassica napus]
MSTRG.87354.5	BnaA01G0035400ZS	0.950407	3.11473e-37	--	auxin-responsive protein SAUR50-like [Brassica napus]
MSTRG.14412.1	BnaA01G0035800ZS	0.954951	1.16426e-38	ADC2	arginine decarboxylase 2 [Pringlea antiscorbutica]
MSTRG.26294.1	BnaA01G0035800ZS	0.953565	3.28465e-38	ADC2	arginine decarboxylase 2 [Pringlea antiscorbutica]
MSTRG.26411.1	BnaA01G0035800ZS	0.977814	2.92807e-49	ADC2	arginine decarboxylase 2 [Pringlea antiscorbutica]
MSTRG.30812.1	BnaA01G0035800ZS	0.955947	5.41261e-39	ADC2	arginine decarboxylase 2 [Pringlea antiscorbutica]
MSTRG.31146.2	BnaA01G0035800ZS	0.951393	1.56761e-37	ADC2	arginine decarboxylase 2 [Pringlea antiscorbutica]
MSTRG.34524.1	BnaA01G0035800ZS	0.951304	1.6689e-37	ADC2	arginine decarboxylase 2 [Pringlea antiscorbutica]
MSTRG.34684.1	BnaA01G0035800ZS	0.960892	9.11507e-41	ADC2	arginine decarboxylase 2 [Pringlea antiscorbutica]
MSTRG.36223.1	BnaA01G0035800ZS	0.957366	1.76227e-39	ADC2	arginine decarboxylase 2 [Pringlea antiscorbutica]
MSTRG.36603.1	BnaA01G0035800ZS	0.952507	7.09904e-38	ADC2	arginine decarboxylase 2 [Pringlea antiscorbutica]
MSTRG.37838.1	BnaA01G0035800ZS	0.965586	1.12344e-42	ADC2	arginine decarboxylase 2 [Pringlea antiscorbutica]
MSTRG.38458.1	BnaA01G0035800ZS	0.951059	1.98137e-37	ADC2	arginine decarboxylase 2 [Pringlea antiscorbutica]
MSTRG.41744.1	BnaA01G0035800ZS	0.961106	7.55101e-41	ADC2	arginine decarboxylase 2 [Pringlea antiscorbutica]
MSTRG.41906.1	BnaA01G0035800ZS	0.956903	2.55206e-39	ADC2	arginine decarboxylase 2 [Pringlea antiscorbutica]
MSTRG.42045.1	BnaA01G0035800ZS	0.961101	7.5825e-41	ADC2	arginine decarboxylase 2 [Pringlea antiscorbutica]
MSTRG.46734.1	BnaA01G0035800ZS	0.969095	2.7641e-44	ADC2	arginine decarboxylase 2 [Pringlea antiscorbutica]
MSTRG.47429.3	BnaA01G0035800ZS	0.951812	1.16651e-37	ADC2	arginine decarboxylase 2 [Pringlea antiscorbutica]
MSTRG.51718.1	BnaA01G0035800ZS	0.953343	3.86536e-38	ADC2	arginine decarboxylase 2 [Pringlea antiscorbutica]
MSTRG.55112.1	BnaA01G0035800ZS	0.971706	1.31449e-45	ADC2	arginine decarboxylase 2 [Pringlea antiscorbutica]
MSTRG.5576.1	BnaA01G0035800ZS	0.962841	1.57452e-41	ADC2	arginine decarboxylase 2 [Pringlea antiscorbutica]
MSTRG.56356.1	BnaA01G0035800ZS	0.968936	3.2995e-44	ADC2	arginine decarboxylase 2 [Pringlea antiscorbutica]
MSTRG.6060.1	BnaA01G0035800ZS	0.952456	7.36216e-38	ADC2	arginine decarboxylase 2 [Pringlea antiscorbutica]
MSTRG.64262.1	BnaA01G0035800ZS	0.951359	1.60572e-37	ADC2	arginine decarboxylase 2 [Pringlea antiscorbutica]
MSTRG.66881.1	BnaA01G0035800ZS	0.95438	1.79176e-38	ADC2	arginine decarboxylase 2 [Pringlea antiscorbutica]
MSTRG.67574.1	BnaA01G0035800ZS	0.98328	1.60984e-53	ADC2	arginine decarboxylase 2 [Pringlea antiscorbutica]
MSTRG.6817.1	BnaA01G0035800ZS	0.954902	1.20831e-38	ADC2	arginine decarboxylase 2 [Pringlea antiscorbutica]
MSTRG.69727.3	BnaA01G0035800ZS	0.965802	9.04796e-43	ADC2	arginine decarboxylase 2 [Pringlea antiscorbutica]
MSTRG.71494.1	BnaA01G0035800ZS	0.959549	2.90456e-40	ADC2	arginine decarboxylase 2 [Pringlea antiscorbutica]
MSTRG.72130.1	BnaA01G0035800ZS	0.952888	5.38969e-38	ADC2	arginine decarboxylase 2 [Pringlea antiscorbutica]
MSTRG.75875.1	BnaA01G0035800ZS	0.959299	3.59089e-40	ADC2	arginine decarboxylase 2 [Pringlea antiscorbutica]
MSTRG.81852.1	BnaA01G0035800ZS	0.965821	8.87131e-43	ADC2	arginine decarboxylase 2 [Pringlea antiscorbutica]
MSTRG.84593.1	BnaA01G0035800ZS	0.954537	1.59192e-38	ADC2	arginine decarboxylase 2 [Pringlea antiscorbutica]
MSTRG.85541.2	BnaA01G0035800ZS	0.95336	3.81912e-38	ADC2	arginine decarboxylase 2 [Pringlea antiscorbutica]
MSTRG.94282.1	BnaA01G0035800ZS	0.950617	2.69348e-37	ADC2	arginine decarboxylase 2 [Pringlea antiscorbutica]
MSTRG.9527.1	BnaA01G0035800ZS	0.960388	1.41505e-40	ADC2	arginine decarboxylase 2 [Pringlea antiscorbutica]
MSTRG.97980.1	BnaA01G0035800ZS	0.967669	1.30763e-43	ADC2	arginine decarboxylase 2 [Pringlea antiscorbutica]
MSTRG.98183.1	BnaA01G0035800ZS	0.950898	2.21625e-37	ADC2	arginine decarboxylase 2 [Pringlea antiscorbutica]
MSTRG.98621.1	BnaA01G0035800ZS	0.958152	9.31025e-40	ADC2	arginine decarboxylase 2 [Pringlea antiscorbutica]
MSTRG.13441.2	BnaA01G0039300ZS	0.958489	7.05746e-40	KCS16	3-ketoacyl-CoA synthase 16-like [Brassica napus]
MSTRG.30340.1	BnaA01G0039300ZS	0.961409	5.7707e-41	KCS16	3-ketoacyl-CoA synthase 16-like [Brassica napus]
MSTRG.35221.3	BnaA01G0039300ZS	0.960854	9.42195e-41	KCS16	3-ketoacyl-CoA synthase 16-like [Brassica napus]
MSTRG.52210.1	BnaA01G0039300ZS	0.95449	1.65007e-38	KCS16	3-ketoacyl-CoA synthase 16-like [Brassica napus]
MSTRG.65347.1	BnaA01G0039300ZS	0.961858	3.85999e-41	KCS16	3-ketoacyl-CoA synthase 16-like [Brassica napus]
MSTRG.84698.1	BnaA01G0039300ZS	0.961161	7.1917e-41	KCS16	3-ketoacyl-CoA synthase 16-like [Brassica napus]
MSTRG.37052.1	BnaA01G0039400ZS	0.961171	7.12732e-41	ALDH3I1	aldehyde dehydrogenase family 3 member I1, chloroplastic-like [Brassica napus]
MSTRG.8511.2	BnaA01G0039700ZS	0.950451	3.02236e-37	At4g34220	receptor protein kinase-like protein At4g34220 [Brassica rapa]
MSTRG.75810.3	BnaA01G0039900ZS	0.951402	1.55806e-37	PGDH1	D-3-phosphoglycerate dehydrogenase 1, chloroplastic [Brassica rapa]
MSTRG.10838.1	BnaA01G0040200ZS	0.957888	1.15585e-39	At3g62230	F-box protein At3g62230-like [Brassica napus]
MSTRG.31146.2	BnaA01G0040200ZS	0.962808	1.62313e-41	At3g62230	F-box protein At3g62230-like [Brassica napus]
MSTRG.36603.1	BnaA01G0040200ZS	0.957015	2.33575e-39	At3g62230	F-box protein At3g62230-like [Brassica napus]
MSTRG.37838.1	BnaA01G0040200ZS	0.956215	4.39362e-39	At3g62230	F-box protein At3g62230-like [Brassica napus]
MSTRG.41744.1	BnaA01G0040200ZS	0.955953	5.38798e-39	At3g62230	F-box protein At3g62230-like [Brassica napus]
MSTRG.53510.1	BnaA01G0040200ZS	0.956927	2.5041e-39	At3g62230	F-box protein At3g62230-like [Brassica napus]
MSTRG.59726.1	BnaA01G0040200ZS	0.956969	2.42228e-39	At3g62230	F-box protein At3g62230-like [Brassica napus]
MSTRG.61557.1	BnaA01G0040200ZS	0.952593	6.67099e-38	At3g62230	F-box protein At3g62230-like [Brassica napus]
MSTRG.75972.1	BnaA01G0040200ZS	0.966832	3.15493e-43	At3g62230	F-box protein At3g62230-like [Brassica napus]
MSTRG.81852.1	BnaA01G0040200ZS	0.955559	7.30914e-39	At3g62230	F-box protein At3g62230-like [Brassica napus]
MSTRG.97828.1	BnaA01G0040200ZS	0.958907	4.98736e-40	At3g62230	F-box protein At3g62230-like [Brassica napus]
MSTRG.40257.1	BnaA01G0040600ZS	0.967267	2.00245e-43	UGT73B3	UDP-glucosyl transferase 73B2 [Brassica napus]
MSTRG.10651.1	BnaA01G0041700ZS	0.961036	8.03241e-41	SRK2E	serine/threonine-protein kinase SRK2E [Brassica rapa]
MSTRG.13783.1	BnaA01G0041700ZS	0.957164	2.07337e-39	SRK2E	serine/threonine-protein kinase SRK2E [Brassica rapa]
MSTRG.14858.1	BnaA01G0041700ZS	0.950127	3.77552e-37	SRK2E	serine/threonine-protein kinase SRK2E [Brassica rapa]
MSTRG.35003.1	BnaA01G0041700ZS	0.962602	1.96156e-41	SRK2E	serine/threonine-protein kinase SRK2E [Brassica rapa]
MSTRG.46580.1	BnaA01G0041700ZS	0.952215	8.75541e-38	SRK2E	serine/threonine-protein kinase SRK2E [Brassica rapa]
MSTRG.46580.2	BnaA01G0041700ZS	0.952215	8.75541e-38	SRK2E	serine/threonine-protein kinase SRK2E [Brassica rapa]
MSTRG.49700.1	BnaA01G0041700ZS	0.967432	1.68297e-43	SRK2E	serine/threonine-protein kinase SRK2E [Brassica rapa]
MSTRG.52223.1	BnaA01G0041700ZS	0.950388	3.15529e-37	SRK2E	serine/threonine-protein kinase SRK2E [Brassica rapa]
MSTRG.62117.1	BnaA01G0041700ZS	0.962563	2.03414e-41	SRK2E	serine/threonine-protein kinase SRK2E [Brassica rapa]
MSTRG.72103.1	BnaA01G0041700ZS	0.950787	2.39441e-37	SRK2E	serine/threonine-protein kinase SRK2E [Brassica rapa]
MSTRG.80811.5	BnaA01G0041700ZS	0.952343	7.98638e-38	SRK2E	serine/threonine-protein kinase SRK2E [Brassica rapa]
MSTRG.3255.2	BnaA01G0043200ZS	0.962069	3.19169e-41	DAP	LL-diaminopimelate aminotransferase, chloroplastic isoform X1 [Brassica rapa]
MSTRG.92395.1	BnaA01G0051800ZS	0.976577	1.91683e-48	KAT3	potassium channel KAT3 [Brassica napus]
MSTRG.71695.2	BnaA01G0051900ZS	0.956538	3.40837e-39	At4g32640	protein transport protein Sec24-like At4g32640 isoform X1 [Brassica napus]
MSTRG.18260.2	BnaA01G0053400ZS	0.952739	6.00177e-38	WNK4	probable serine/threonine-protein kinase WNK4, partial [Brassica napus]
MSTRG.92942.3	BnaA01G0058300ZS	0.958953	4.79975e-40	--	BnaA08g12340D [Brassica napus]
MSTRG.95813.2	BnaA01G0058300ZS	0.966341	5.23451e-43	--	BnaA08g12340D [Brassica napus]
MSTRG.83942.1	BnaA01G0069400ZS	0.959436	3.19891e-40	TET9	tetraspanin-9 [Brassica rapa]
MSTRG.75340.1	BnaA01G0079500ZS	0.955143	1.00562e-38	PFK1	ATP-dependent 6-phosphofructokinase 1 isoform X1 [Eutrema salsugineum]
MSTRG.16739.1	BnaA01G0081000ZS	0.950244	3.48274e-37	--	glycine-rich protein 23-like [Brassica napus]
MSTRG.42068.1	BnaA01G0081000ZS	0.963176	1.15282e-41	--	glycine-rich protein 23-like [Brassica napus]
MSTRG.92791.1	BnaA01G0081000ZS	0.952385	7.74881e-38	--	glycine-rich protein 23-like [Brassica napus]
MSTRG.94173.1	BnaA01G0081000ZS	0.953618	3.15771e-38	--	glycine-rich protein 23-like [Brassica napus]
MSTRG.3227.1	BnaA01G0092500ZS	0.95279	5.78775e-38	At2g27500	glucan endo-1,3-beta-glucosidase 14 [Brassica rapa]
MSTRG.34242.1	BnaA01G0092500ZS	0.975129	1.52503e-47	At2g27500	glucan endo-1,3-beta-glucosidase 14 [Brassica rapa]
MSTRG.40228.1	BnaA01G0092500ZS	0.954876	1.23272e-38	At2g27500	glucan endo-1,3-beta-glucosidase 14 [Brassica rapa]
MSTRG.41877.1	BnaA01G0092500ZS	0.957455	1.64144e-39	At2g27500	glucan endo-1,3-beta-glucosidase 14 [Brassica rapa]
MSTRG.49673.1	BnaA01G0092500ZS	0.956466	3.6075e-39	At2g27500	glucan endo-1,3-beta-glucosidase 14 [Brassica rapa]
MSTRG.64821.1	BnaA01G0092500ZS	0.981487	5.52354e-52	At2g27500	glucan endo-1,3-beta-glucosidase 14 [Brassica rapa]
MSTRG.64823.1	BnaA01G0092500ZS	0.968531	5.15593e-44	At2g27500	glucan endo-1,3-beta-glucosidase 14 [Brassica rapa]
MSTRG.8578.1	BnaA01G0092500ZS	0.961316	6.27144e-41	At2g27500	glucan endo-1,3-beta-glucosidase 14 [Brassica rapa]
MSTRG.88503.1	BnaA01G0092500ZS	0.958914	4.95947e-40	At2g27500	glucan endo-1,3-beta-glucosidase 14 [Brassica rapa]
MSTRG.94644.1	BnaA01G0092500ZS	0.972126	7.83843e-46	At2g27500	glucan endo-1,3-beta-glucosidase 14 [Brassica rapa]
MSTRG.95453.1	BnaA01G0092500ZS	0.97699	1.03558e-48	At2g27500	glucan endo-1,3-beta-glucosidase 14 [Brassica rapa]
MSTRG.10651.1	BnaA01G0094000ZS	0.972653	4.05738e-46	RABA1E	ras-related protein RABA1e [Brassica rapa]
MSTRG.13783.1	BnaA01G0094000ZS	0.965883	8.33589e-43	RABA1E	ras-related protein RABA1e [Brassica rapa]
MSTRG.14858.1	BnaA01G0094000ZS	0.952624	6.52345e-38	RABA1E	ras-related protein RABA1e [Brassica rapa]
MSTRG.36603.1	BnaA01G0094000ZS	0.950428	3.0697e-37	RABA1E	ras-related protein RABA1e [Brassica rapa]
MSTRG.38786.1	BnaA01G0094000ZS	0.958805	5.43212e-40	RABA1E	ras-related protein RABA1e [Brassica rapa]
MSTRG.44095.1	BnaA01G0094000ZS	0.95715	2.096e-39	RABA1E	ras-related protein RABA1e [Brassica rapa]
MSTRG.45508.2	BnaA01G0094000ZS	0.963332	9.96352e-42	RABA1E	ras-related protein RABA1e [Brassica rapa]
MSTRG.46364.1	BnaA01G0094000ZS	0.967554	1.47916e-43	RABA1E	ras-related protein RABA1e [Brassica rapa]
MSTRG.46580.1	BnaA01G0094000ZS	0.951562	1.39163e-37	RABA1E	ras-related protein RABA1e [Brassica rapa]
MSTRG.46580.2	BnaA01G0094000ZS	0.951562	1.39163e-37	RABA1E	ras-related protein RABA1e [Brassica rapa]
MSTRG.49700.1	BnaA01G0094000ZS	0.967771	1.17317e-43	RABA1E	ras-related protein RABA1e [Brassica rapa]
MSTRG.50037.1	BnaA01G0094000ZS	0.952205	8.81682e-38	RABA1E	ras-related protein RABA1e [Brassica rapa]
MSTRG.52223.1	BnaA01G0094000ZS	0.955442	7.99883e-39	RABA1E	ras-related protein RABA1e [Brassica rapa]
MSTRG.52502.1	BnaA01G0094000ZS	0.950331	3.28225e-37	RABA1E	ras-related protein RABA1e [Brassica rapa]
MSTRG.53609.1	BnaA01G0094000ZS	0.9509	2.21412e-37	RABA1E	ras-related protein RABA1e [Brassica rapa]
MSTRG.53615.1	BnaA01G0094000ZS	0.9565	3.51239e-39	RABA1E	ras-related protein RABA1e [Brassica rapa]
MSTRG.53952.1	BnaA01G0094000ZS	0.955297	8.93968e-39	RABA1E	ras-related protein RABA1e [Brassica rapa]
MSTRG.59649.1	BnaA01G0094000ZS	0.952859	5.50462e-38	RABA1E	ras-related protein RABA1e [Brassica rapa]
MSTRG.6060.1	BnaA01G0094000ZS	0.961919	3.65532e-41	RABA1E	ras-related protein RABA1e [Brassica rapa]
MSTRG.62117.1	BnaA01G0094000ZS	0.972345	5.97048e-46	RABA1E	ras-related protein RABA1e [Brassica rapa]
MSTRG.67566.1	BnaA01G0094000ZS	0.958477	7.1298e-40	RABA1E	ras-related protein RABA1e [Brassica rapa]
MSTRG.70492.1	BnaA01G0094000ZS	0.959626	2.72241e-40	RABA1E	ras-related protein RABA1e [Brassica rapa]
MSTRG.71034.1	BnaA01G0094000ZS	0.958295	8.28051e-40	RABA1E	ras-related protein RABA1e [Brassica rapa]
MSTRG.72103.1	BnaA01G0094000ZS	0.960318	1.50385e-40	RABA1E	ras-related protein RABA1e [Brassica rapa]
MSTRG.72324.1	BnaA01G0094000ZS	0.95167	1.28965e-37	RABA1E	ras-related protein RABA1e [Brassica rapa]
MSTRG.72860.1	BnaA01G0094000ZS	0.954004	2.37223e-38	RABA1E	ras-related protein RABA1e [Brassica rapa]
MSTRG.74242.1	BnaA01G0094000ZS	0.965729	9.72965e-43	RABA1E	ras-related protein RABA1e [Brassica rapa]
MSTRG.77317.2	BnaA01G0094000ZS	0.958587	6.50931e-40	RABA1E	ras-related protein RABA1e [Brassica rapa]
MSTRG.80369.1	BnaA01G0094000ZS	0.951202	1.7931e-37	RABA1E	ras-related protein RABA1e [Brassica rapa]
MSTRG.80582.1	BnaA01G0094000ZS	0.974617	3.08665e-47	RABA1E	ras-related protein RABA1e [Brassica rapa]
MSTRG.80811.5	BnaA01G0094000ZS	0.955508	7.60531e-39	RABA1E	ras-related protein RABA1e [Brassica rapa]
MSTRG.83171.1	BnaA01G0094000ZS	0.96246	2.23488e-41	RABA1E	ras-related protein RABA1e [Brassica rapa]
MSTRG.92367.1	BnaA01G0094000ZS	0.952573	6.76765e-38	RABA1E	ras-related protein RABA1e [Brassica rapa]
MSTRG.96207.1	BnaA01G0094000ZS	0.958488	7.06434e-40	RABA1E	ras-related protein RABA1e [Brassica rapa]
MSTRG.98158.4	BnaA01G0094000ZS	0.951208	1.78495e-37	RABA1E	ras-related protein RABA1e [Brassica rapa]
MSTRG.99321.1	BnaA01G0094000ZS	0.957346	1.79142e-39	RABA1E	ras-related protein RABA1e [Brassica rapa]
MSTRG.99671.1	BnaA01G0094000ZS	0.954827	1.27914e-38	RABA1E	ras-related protein RABA1e [Brassica rapa]
MSTRG.101555.1	BnaA01G0096800ZS	0.961439	5.62093e-41	DOGL1	protein DOG1-like 1 [Brassica napus]
MSTRG.1668.1	BnaA01G0096800ZS	0.955645	6.8424e-39	DOGL1	protein DOG1-like 1 [Brassica napus]
MSTRG.18356.1	BnaA01G0096800ZS	0.985119	2.81303e-55	DOGL1	protein DOG1-like 1 [Brassica napus]
MSTRG.19513.1	BnaA01G0096800ZS	0.975256	1.2789e-47	DOGL1	protein DOG1-like 1 [Brassica napus]
MSTRG.23412.1	BnaA01G0096800ZS	0.97311	2.26526e-46	DOGL1	protein DOG1-like 1 [Brassica napus]
MSTRG.23413.1	BnaA01G0096800ZS	0.984642	8.42088e-55	DOGL1	protein DOG1-like 1 [Brassica napus]
MSTRG.3033.1	BnaA01G0096800ZS	0.960258	1.58397e-40	DOGL1	protein DOG1-like 1 [Brassica napus]
MSTRG.33906.1	BnaA01G0096800ZS	0.971136	2.61689e-45	DOGL1	protein DOG1-like 1 [Brassica napus]
MSTRG.40160.1	BnaA01G0096800ZS	0.95782	1.22134e-39	DOGL1	protein DOG1-like 1 [Brassica napus]
MSTRG.44104.3	BnaA01G0096800ZS	0.966415	4.85345e-43	DOGL1	protein DOG1-like 1 [Brassica napus]
MSTRG.44669.1	BnaA01G0096800ZS	0.960624	1.15304e-40	DOGL1	protein DOG1-like 1 [Brassica napus]
MSTRG.45726.1	BnaA01G0096800ZS	0.978898	5.16743e-50	DOGL1	protein DOG1-like 1 [Brassica napus]
MSTRG.5500.1	BnaA01G0096800ZS	0.970484	5.65835e-45	DOGL1	protein DOG1-like 1 [Brassica napus]
MSTRG.58721.2	BnaA01G0096800ZS	0.982185	1.45514e-52	DOGL1	protein DOG1-like 1 [Brassica napus]
MSTRG.58904.1	BnaA01G0096800ZS	0.951731	1.23504e-37	DOGL1	protein DOG1-like 1 [Brassica napus]
MSTRG.61346.1	BnaA01G0096800ZS	0.957298	1.86149e-39	DOGL1	protein DOG1-like 1 [Brassica napus]
MSTRG.69535.3	BnaA01G0096800ZS	0.967577	1.44319e-43	DOGL1	protein DOG1-like 1 [Brassica napus]
MSTRG.76909.1	BnaA01G0096800ZS	0.974631	3.03038e-47	DOGL1	protein DOG1-like 1 [Brassica napus]
MSTRG.77453.1	BnaA01G0096800ZS	0.959447	3.16689e-40	DOGL1	protein DOG1-like 1 [Brassica napus]
MSTRG.78147.1	BnaA01G0096800ZS	0.9682	7.39054e-44	DOGL1	protein DOG1-like 1 [Brassica napus]
MSTRG.84877.1	BnaA01G0096800ZS	0.967328	1.87878e-43	DOGL1	protein DOG1-like 1 [Brassica napus]
MSTRG.86505.1	BnaA01G0096800ZS	0.969035	2.95482e-44	DOGL1	protein DOG1-like 1 [Brassica napus]
MSTRG.88420.2	BnaA01G0096800ZS	0.986498	9.57399e-57	DOGL1	protein DOG1-like 1 [Brassica napus]
MSTRG.88420.4	BnaA01G0096800ZS	0.965015	1.97937e-42	DOGL1	protein DOG1-like 1 [Brassica napus]
MSTRG.94437.1	BnaA01G0096800ZS	0.971827	1.13311e-45	DOGL1	protein DOG1-like 1 [Brassica napus]
MSTRG.99567.1	BnaA01G0096800ZS	0.963323	1.00458e-41	DOGL1	protein DOG1-like 1 [Brassica napus]
MSTRG.99567.2	BnaA01G0096800ZS	0.961587	4.92374e-41	DOGL1	protein DOG1-like 1 [Brassica napus]
MSTRG.99567.3	BnaA01G0096800ZS	0.957581	1.48257e-39	DOGL1	protein DOG1-like 1 [Brassica napus]
MSTRG.99568.1	BnaA01G0096800ZS	0.976607	1.83259e-48	DOGL1	protein DOG1-like 1 [Brassica napus]
MSTRG.1708.1	BnaA01G0098100ZS	0.955785	6.13653e-39	At3g17530	F-box/kelch-repeat protein At3g17530-like [Brassica napus]
MSTRG.96888.1	BnaA01G0098100ZS	0.952728	6.04931e-38	At3g17530	F-box/kelch-repeat protein At3g17530-like [Brassica napus]
MSTRG.42973.2	BnaA01G0103500ZS	0.951529	1.4251e-37	--	UDP-Glycosyltransferase superfamily protein [Arabidopsis thaliana]
MSTRG.42973.3	BnaA01G0103500ZS	0.966101	6.68764e-43	--	UDP-Glycosyltransferase superfamily protein [Arabidopsis thaliana]
MSTRG.59864.1	BnaA01G0103500ZS	0.955807	6.03307e-39	--	UDP-Glycosyltransferase superfamily protein [Arabidopsis thaliana]
MSTRG.73843.1	BnaA01G0103500ZS	0.952506	7.10335e-38	--	UDP-Glycosyltransferase superfamily protein [Arabidopsis thaliana]
MSTRG.13372.1	BnaA01G0104400ZS	0.970579	5.05993e-45	--	uncharacterized protein LOC111200129 [Brassica napus]
MSTRG.34026.1	BnaA01G0104400ZS	0.971843	1.11218e-45	--	uncharacterized protein LOC111200129 [Brassica napus]
MSTRG.47390.1	BnaA01G0104400ZS	0.957902	1.14274e-39	--	uncharacterized protein LOC111200129 [Brassica napus]
MSTRG.49959.1	BnaA01G0104400ZS	0.952361	7.88401e-38	--	uncharacterized protein LOC111200129 [Brassica napus]
MSTRG.5471.1	BnaA01G0104400ZS	0.950273	3.41424e-37	--	uncharacterized protein LOC111200129 [Brassica napus]
MSTRG.71151.1	BnaA01G0104400ZS	0.980289	4.8623e-51	--	uncharacterized protein LOC111200129 [Brassica napus]
MSTRG.51752.1	BnaA01G0105700ZS	0.954999	1.12283e-38	ChiC	chitotriosidase-1 [Brassica napus]
MSTRG.92237.1	BnaA01G0105700ZS	0.965027	1.95646e-42	ChiC	chitotriosidase-1 [Brassica napus]
MSTRG.79862.1	BnaA01G0107800ZS	0.951477	1.4778e-37	--	general transcriptional corepressor trfA-like [Brassica napus]
MSTRG.51391.1	BnaA01G0108100ZS	0.96095	8.66632e-41	CYP71A28	CYP71A15 [Arabidopsis thaliana]
MSTRG.77919.1	BnaA01G0108100ZS	0.958299	8.25141e-40	CYP71A28	CYP71A15 [Arabidopsis thaliana]
MSTRG.42690.1	BnaA01G0108900ZS	0.962976	1.38894e-41	--	unnamed protein product [Brassica rapa]
MSTRG.43854.1	BnaA01G0108900ZS	0.964669	2.77589e-42	--	unnamed protein product [Brassica rapa]
MSTRG.49673.1	BnaA01G0108900ZS	0.964941	2.12935e-42	--	unnamed protein product [Brassica rapa]
MSTRG.83393.1	BnaA01G0108900ZS	0.957851	1.19058e-39	--	unnamed protein product [Brassica rapa]
MSTRG.8578.1	BnaA01G0108900ZS	0.958447	7.30466e-40	--	unnamed protein product [Brassica rapa]
MSTRG.88503.1	BnaA01G0108900ZS	0.952327	8.0786e-38	--	unnamed protein product [Brassica rapa]
MSTRG.95453.1	BnaA01G0108900ZS	0.956326	4.02698e-39	--	unnamed protein product [Brassica rapa]
MSTRG.98454.1	BnaA01G0108900ZS	0.956631	3.16743e-39	--	unnamed protein product [Brassica rapa]
MSTRG.3227.1	BnaA01G0111300ZS	0.969001	3.06913e-44	FAD-OXR	BnaAnng31480D [Brassica napus]
MSTRG.34242.1	BnaA01G0111300ZS	0.971114	2.68729e-45	FAD-OXR	BnaAnng31480D [Brassica napus]
MSTRG.42690.1	BnaA01G0111300ZS	0.962906	1.48163e-41	FAD-OXR	BnaAnng31480D [Brassica napus]
MSTRG.49673.1	BnaA01G0111300ZS	0.9564	3.79985e-39	FAD-OXR	BnaAnng31480D [Brassica napus]
MSTRG.56778.1	BnaA01G0111300ZS	0.954687	1.42176e-38	FAD-OXR	BnaAnng31480D [Brassica napus]
MSTRG.64821.1	BnaA01G0111300ZS	0.972689	3.87416e-46	FAD-OXR	BnaAnng31480D [Brassica napus]
MSTRG.64823.1	BnaA01G0111300ZS	0.97663	1.77047e-48	FAD-OXR	BnaAnng31480D [Brassica napus]
MSTRG.67255.1	BnaA01G0111300ZS	0.960365	1.44406e-40	FAD-OXR	BnaAnng31480D [Brassica napus]
MSTRG.8578.1	BnaA01G0111300ZS	0.968441	5.69068e-44	FAD-OXR	BnaAnng31480D [Brassica napus]
MSTRG.88503.1	BnaA01G0111300ZS	0.961711	4.40506e-41	FAD-OXR	BnaAnng31480D [Brassica napus]
MSTRG.94644.1	BnaA01G0111300ZS	0.962862	1.54434e-41	FAD-OXR	BnaAnng31480D [Brassica napus]
MSTRG.95453.1	BnaA01G0111300ZS	0.976648	1.72345e-48	FAD-OXR	BnaAnng31480D [Brassica napus]
MSTRG.98454.1	BnaA01G0111300ZS	0.966976	2.71522e-43	FAD-OXR	BnaAnng31480D [Brassica napus]
MSTRG.92237.1	BnaA01G0112200ZS	0.951155	1.85259e-37	--	late embryogenesis abundant protein 1-like [Brassica napus]
MSTRG.42973.2	BnaA01G0112300ZS	0.959489	3.05653e-40	DOF4.4	dof zinc finger protein DOF4.4-like [Brassica napus]
MSTRG.42973.3	BnaA01G0112300ZS	0.965977	7.58323e-43	DOF4.4	dof zinc finger protein DOF4.4-like [Brassica napus]
MSTRG.73845.1	BnaA01G0112300ZS	0.956609	3.22283e-39	DOF4.4	dof zinc finger protein DOF4.4-like [Brassica napus]
MSTRG.31104.1	BnaA01G0112400ZS	0.960776	1.00971e-40	DOF4.4	dof zinc finger protein DOF4.4 [Brassica rapa]
MSTRG.32319.1	BnaA01G0112400ZS	0.953508	3.42568e-38	DOF4.4	dof zinc finger protein DOF4.4 [Brassica rapa]
MSTRG.3255.2	BnaA01G0112400ZS	0.954531	1.59916e-38	DOF4.4	dof zinc finger protein DOF4.4 [Brassica rapa]
MSTRG.33349.1	BnaA01G0112400ZS	0.969233	2.36797e-44	DOF4.4	dof zinc finger protein DOF4.4 [Brassica rapa]
MSTRG.42636.1	BnaA01G0112400ZS	0.976595	1.86587e-48	DOF4.4	dof zinc finger protein DOF4.4 [Brassica rapa]
MSTRG.44378.1	BnaA01G0112400ZS	0.97076	4.08998e-45	DOF4.4	dof zinc finger protein DOF4.4 [Brassica rapa]
MSTRG.53597.2	BnaA01G0112400ZS	0.962382	2.40034e-41	DOF4.4	dof zinc finger protein DOF4.4 [Brassica rapa]
MSTRG.53609.1	BnaA01G0112400ZS	0.952232	8.64626e-38	DOF4.4	dof zinc finger protein DOF4.4 [Brassica rapa]
MSTRG.53615.1	BnaA01G0112400ZS	0.958728	5.7894e-40	DOF4.4	dof zinc finger protein DOF4.4 [Brassica rapa]
MSTRG.61518.1	BnaA01G0112400ZS	0.952805	5.72389e-38	DOF4.4	dof zinc finger protein DOF4.4 [Brassica rapa]
MSTRG.62533.1	BnaA01G0112400ZS	0.957588	1.47385e-39	DOF4.4	dof zinc finger protein DOF4.4 [Brassica rapa]
MSTRG.69703.1	BnaA01G0112400ZS	0.957353	1.78079e-39	DOF4.4	dof zinc finger protein DOF4.4 [Brassica rapa]
MSTRG.74242.1	BnaA01G0112400ZS	0.951143	1.86834e-37	DOF4.4	dof zinc finger protein DOF4.4 [Brassica rapa]
MSTRG.75558.1	BnaA01G0112400ZS	0.95158	1.37418e-37	DOF4.4	dof zinc finger protein DOF4.4 [Brassica rapa]
MSTRG.77133.1	BnaA01G0112400ZS	0.979932	9.05121e-51	DOF4.4	dof zinc finger protein DOF4.4 [Brassica rapa]
MSTRG.77795.1	BnaA01G0112400ZS	0.951716	1.24835e-37	DOF4.4	dof zinc finger protein DOF4.4 [Brassica rapa]
MSTRG.80732.1	BnaA01G0112400ZS	0.964329	3.85952e-42	DOF4.4	dof zinc finger protein DOF4.4 [Brassica rapa]
MSTRG.86444.1	BnaA01G0112400ZS	0.950047	3.98661e-37	DOF4.4	dof zinc finger protein DOF4.4 [Brassica rapa]
MSTRG.87992.1	BnaA01G0112400ZS	0.968212	7.29502e-44	DOF4.4	dof zinc finger protein DOF4.4 [Brassica rapa]
MSTRG.96951.1	BnaA01G0112400ZS	0.975043	1.71985e-47	DOF4.4	dof zinc finger protein DOF4.4 [Brassica rapa]
MSTRG.40259.1	BnaA01G0121800ZS	0.956885	2.58897e-39	SRF8	protein STRUBBELIG-RECEPTOR FAMILY 8 isoform X1 [Brassica napus]
MSTRG.29818.1	BnaA01G0122700ZS	0.951956	1.05321e-37	PAP2	plastid lipid-associated protein 2, chloroplastic [Brassica napus]
MSTRG.78774.1	BnaA01G0122700ZS	0.956139	4.6603e-39	PAP2	plastid lipid-associated protein 2, chloroplastic [Brassica napus]
MSTRG.83393.1	BnaA01G0122700ZS	0.953849	2.66264e-38	PAP2	plastid lipid-associated protein 2, chloroplastic [Brassica napus]
MSTRG.13233.1	BnaA01G0141100ZS	0.961081	7.71669e-41	CER2	protein ECERIFERUM 2-like [Brassica napus]
MSTRG.15242.1	BnaA01G0141100ZS	0.964547	3.12794e-42	CER2	protein ECERIFERUM 2-like [Brassica napus]
MSTRG.4138.1	BnaA01G0141100ZS	0.950367	3.20193e-37	CER2	protein ECERIFERUM 2-like [Brassica napus]
MSTRG.50040.1	BnaA01G0141100ZS	0.96219	2.86024e-41	CER2	protein ECERIFERUM 2-like [Brassica napus]
MSTRG.57211.1	BnaA01G0141100ZS	0.959013	4.56338e-40	CER2	protein ECERIFERUM 2-like [Brassica napus]
MSTRG.8836.1	BnaA01G0141100ZS	0.962377	2.41084e-41	CER2	protein ECERIFERUM 2-like [Brassica napus]
MSTRG.10142.1	BnaA01G0141700ZS	0.953897	2.56909e-38	PUMP4	mitochondrial uncoupling protein 4-like isoform X2 [Brassica napus]
MSTRG.37052.1	BnaA01G0141700ZS	0.95714	2.11353e-39	PUMP4	mitochondrial uncoupling protein 4-like isoform X2 [Brassica napus]
MSTRG.89747.2	BnaA01G0146600ZS	0.953733	2.90225e-38	At4g25140	major oleosin NAP-II [Brassica napus]
MSTRG.95813.2	BnaA01G0146600ZS	0.970195	7.92055e-45	At4g25140	major oleosin NAP-II [Brassica napus]
MSTRG.100508.1	BnaA01G0146900ZS	0.972247	6.7464e-46	--	BnaA01g14510D [Brassica napus]
MSTRG.12873.1	BnaA01G0146900ZS	0.958084	9.84511e-40	--	BnaA01g14510D [Brassica napus]
MSTRG.15992.1	BnaA01G0146900ZS	0.960146	1.74412e-40	--	BnaA01g14510D [Brassica napus]
MSTRG.16560.1	BnaA01G0146900ZS	0.95574	6.35505e-39	--	BnaA01g14510D [Brassica napus]
MSTRG.24943.1	BnaA01G0146900ZS	0.953252	4.13305e-38	--	BnaA01g14510D [Brassica napus]
MSTRG.27031.1	BnaA01G0146900ZS	0.985337	1.68145e-55	--	BnaA01g14510D [Brassica napus]
MSTRG.31607.1	BnaA01G0146900ZS	0.953687	3.00075e-38	--	BnaA01g14510D [Brassica napus]
MSTRG.34620.1	BnaA01G0146900ZS	0.962387	2.38876e-41	--	BnaA01g14510D [Brassica napus]
MSTRG.39674.1	BnaA01G0146900ZS	0.961371	5.97095e-41	--	BnaA01g14510D [Brassica napus]
MSTRG.40370.1	BnaA01G0146900ZS	0.958328	8.05717e-40	--	BnaA01g14510D [Brassica napus]
MSTRG.4640.1	BnaA01G0146900ZS	0.955629	6.92409e-39	--	BnaA01g14510D [Brassica napus]
MSTRG.57756.1	BnaA01G0146900ZS	0.953873	2.61518e-38	--	BnaA01g14510D [Brassica napus]
MSTRG.74274.1	BnaA01G0146900ZS	0.956627	3.17583e-39	--	BnaA01g14510D [Brassica napus]
MSTRG.77164.1	BnaA01G0146900ZS	0.967012	2.61754e-43	--	BnaA01g14510D [Brassica napus]
MSTRG.77453.1	BnaA01G0146900ZS	0.954415	1.74535e-38	--	BnaA01g14510D [Brassica napus]
MSTRG.77919.1	BnaA01G0146900ZS	0.968301	6.62251e-44	--	BnaA01g14510D [Brassica napus]
MSTRG.77921.1	BnaA01G0146900ZS	0.959617	2.74158e-40	--	BnaA01g14510D [Brassica napus]
MSTRG.84438.1	BnaA01G0146900ZS	0.987517	6.24853e-58	--	BnaA01g14510D [Brassica napus]
MSTRG.8596.1	BnaA01G0146900ZS	0.950673	2.59169e-37	--	BnaA01g14510D [Brassica napus]
MSTRG.86503.1	BnaA01G0146900ZS	0.973768	9.62317e-47	--	BnaA01g14510D [Brassica napus]
MSTRG.88258.1	BnaA01G0146900ZS	0.954598	1.52058e-38	--	BnaA01g14510D [Brassica napus]
MSTRG.91202.1	BnaA01G0146900ZS	0.978781	6.25629e-50	--	BnaA01g14510D [Brassica napus]
MSTRG.92912.1	BnaA01G0146900ZS	0.966027	7.20421e-43	--	BnaA01g14510D [Brassica napus]
MSTRG.92975.2	BnaA01G0146900ZS	0.971736	1.26693e-45	--	BnaA01g14510D [Brassica napus]
MSTRG.99088.1	BnaA01G0146900ZS	0.950759	2.44209e-37	--	BnaA01g14510D [Brassica napus]
MSTRG.46348.1	BnaA01G0154200ZS	0.959133	4.12694e-40	HI_1317	aldose 1-epimerase family protein [Arabidopsis lyrata subsp. lyrata] [Arabidopsis lyrata]
MSTRG.54579.1	BnaA01G0154200ZS	0.951621	1.33575e-37	HI_1317	aldose 1-epimerase family protein [Arabidopsis lyrata subsp. lyrata] [Arabidopsis lyrata]
MSTRG.65741.1	BnaA01G0154200ZS	0.954701	1.40719e-38	HI_1317	aldose 1-epimerase family protein [Arabidopsis lyrata subsp. lyrata] [Arabidopsis lyrata]
MSTRG.79559.1	BnaA01G0156600ZS	0.962498	2.15806e-41	GATA22	BnaA03g47870D [Brassica napus]
MSTRG.3255.2	BnaA01G0156800ZS	0.954626	1.48947e-38	At3g52680	F-box/LRR-repeat protein At3g26922-like [Brassica napus]
MSTRG.45791.1	BnaA01G0156800ZS	0.961773	4.16743e-41	At3g52680	F-box/LRR-repeat protein At3g26922-like [Brassica napus]
MSTRG.50037.1	BnaA01G0156800ZS	0.95762	1.43573e-39	At3g52680	F-box/LRR-repeat protein At3g26922-like [Brassica napus]
MSTRG.53609.1	BnaA01G0156800ZS	0.965858	8.54887e-43	At3g52680	F-box/LRR-repeat protein At3g26922-like [Brassica napus]
MSTRG.53615.1	BnaA01G0156800ZS	0.955368	8.469e-39	At3g52680	F-box/LRR-repeat protein At3g26922-like [Brassica napus]
MSTRG.57663.1	BnaA01G0156800ZS	0.964005	5.26953e-42	At3g52680	F-box/LRR-repeat protein At3g26922-like [Brassica napus]
MSTRG.59649.1	BnaA01G0156800ZS	0.971716	1.29905e-45	At3g52680	F-box/LRR-repeat protein At3g26922-like [Brassica napus]
MSTRG.71034.1	BnaA01G0156800ZS	0.952527	6.99713e-38	At3g52680	F-box/LRR-repeat protein At3g26922-like [Brassica napus]
MSTRG.72103.1	BnaA01G0156800ZS	0.961566	5.01692e-41	At3g52680	F-box/LRR-repeat protein At3g26922-like [Brassica napus]
MSTRG.74242.1	BnaA01G0156800ZS	0.958481	7.10558e-40	At3g52680	F-box/LRR-repeat protein At3g26922-like [Brassica napus]
MSTRG.77317.2	BnaA01G0156800ZS	0.953426	3.63841e-38	At3g52680	F-box/LRR-repeat protein At3g26922-like [Brassica napus]
MSTRG.80582.1	BnaA01G0156800ZS	0.952449	7.3999e-38	At3g52680	F-box/LRR-repeat protein At3g26922-like [Brassica napus]
MSTRG.83171.1	BnaA01G0156800ZS	0.950243	3.48523e-37	At3g52680	F-box/LRR-repeat protein At3g26922-like [Brassica napus]
MSTRG.10651.1	BnaA01G0157700ZS	0.951023	2.0322e-37	SOT3	cytosolic sulfotransferase 3 [Brassica rapa]
MSTRG.12109.1	BnaA01G0157700ZS	0.969504	1.74447e-44	SOT3	cytosolic sulfotransferase 3 [Brassica rapa]
MSTRG.13783.1	BnaA01G0157700ZS	0.952624	6.52586e-38	SOT3	cytosolic sulfotransferase 3 [Brassica rapa]
MSTRG.15257.3	BnaA01G0157700ZS	0.968841	3.66529e-44	SOT3	cytosolic sulfotransferase 3 [Brassica rapa]
MSTRG.17090.1	BnaA01G0157700ZS	0.95686	2.64038e-39	SOT3	cytosolic sulfotransferase 3 [Brassica rapa]
MSTRG.19942.2	BnaA01G0157700ZS	0.967387	1.76551e-43	SOT3	cytosolic sulfotransferase 3 [Brassica rapa]
MSTRG.25304.1	BnaA01G0157700ZS	0.965522	1.19719e-42	SOT3	cytosolic sulfotransferase 3 [Brassica rapa]
MSTRG.26935.1	BnaA01G0157700ZS	0.954972	1.14548e-38	SOT3	cytosolic sulfotransferase 3 [Brassica rapa]
MSTRG.29698.1	BnaA01G0157700ZS	0.953181	4.353e-38	SOT3	cytosolic sulfotransferase 3 [Brassica rapa]
MSTRG.32319.1	BnaA01G0157700ZS	0.951983	1.03312e-37	SOT3	cytosolic sulfotransferase 3 [Brassica rapa]
MSTRG.46580.1	BnaA01G0157700ZS	0.967306	1.92205e-43	SOT3	cytosolic sulfotransferase 3 [Brassica rapa]
MSTRG.46580.2	BnaA01G0157700ZS	0.967306	1.92205e-43	SOT3	cytosolic sulfotransferase 3 [Brassica rapa]
MSTRG.49700.1	BnaA01G0157700ZS	0.955013	1.11018e-38	SOT3	cytosolic sulfotransferase 3 [Brassica rapa]
MSTRG.52502.1	BnaA01G0157700ZS	0.953767	2.83013e-38	SOT3	cytosolic sulfotransferase 3 [Brassica rapa]
MSTRG.53953.1	BnaA01G0157700ZS	0.953748	2.86971e-38	SOT3	cytosolic sulfotransferase 3 [Brassica rapa]
MSTRG.56563.1	BnaA01G0157700ZS	0.951194	1.80315e-37	SOT3	cytosolic sulfotransferase 3 [Brassica rapa]
MSTRG.62117.1	BnaA01G0157700ZS	0.952094	9.54232e-38	SOT3	cytosolic sulfotransferase 3 [Brassica rapa]
MSTRG.64976.1	BnaA01G0157700ZS	0.953212	4.2571e-38	SOT3	cytosolic sulfotransferase 3 [Brassica rapa]
MSTRG.70049.1	BnaA01G0157700ZS	0.97983	1.07918e-50	SOT3	cytosolic sulfotransferase 3 [Brassica rapa]
MSTRG.77994.1	BnaA01G0157700ZS	0.958603	6.42349e-40	SOT3	cytosolic sulfotransferase 3 [Brassica rapa]
MSTRG.78201.2	BnaA01G0157700ZS	0.968402	5.93637e-44	SOT3	cytosolic sulfotransferase 3 [Brassica rapa]
MSTRG.78212.1	BnaA01G0157700ZS	0.966056	6.99791e-43	SOT3	cytosolic sulfotransferase 3 [Brassica rapa]
MSTRG.80811.5	BnaA01G0157700ZS	0.953077	4.69801e-38	SOT3	cytosolic sulfotransferase 3 [Brassica rapa]
MSTRG.85520.1	BnaA01G0157700ZS	0.954341	1.84471e-38	SOT3	cytosolic sulfotransferase 3 [Brassica rapa]
MSTRG.88177.1	BnaA01G0157700ZS	0.984114	2.71939e-54	SOT3	cytosolic sulfotransferase 3 [Brassica rapa]
MSTRG.89840.5	BnaA01G0157700ZS	0.953346	3.85924e-38	SOT3	cytosolic sulfotransferase 3 [Brassica rapa]
MSTRG.92010.2	BnaA01G0157700ZS	0.951283	1.69395e-37	SOT3	cytosolic sulfotransferase 3 [Brassica rapa]
MSTRG.9704.1	BnaA01G0157700ZS	0.957497	1.58688e-39	SOT3	cytosolic sulfotransferase 3 [Brassica rapa]
MSTRG.43792.2	BnaA01G0161500ZS	0.956376	3.87251e-39	PXG1	peroxygenase 1 [Brassica rapa]
MSTRG.89747.2	BnaA01G0161500ZS	0.96548	1.2489e-42	PXG1	peroxygenase 1 [Brassica rapa]
MSTRG.3840.2	BnaA01G0165000ZS	0.966642	3.84355e-43	NAP1	napin-like [Brassica rapa]
MSTRG.4071.1	BnaA01G0165000ZS	0.957443	1.65683e-39	NAP1	napin-like [Brassica rapa]
MSTRG.51182.6	BnaA01G0165000ZS	0.950166	3.67497e-37	NAP1	napin-like [Brassica rapa]
MSTRG.51182.7	BnaA01G0165000ZS	0.956172	4.5428e-39	NAP1	napin-like [Brassica rapa]
MSTRG.51489.1	BnaA01G0165000ZS	0.957425	1.68124e-39	NAP1	napin-like [Brassica rapa]
MSTRG.15011.1	BnaA01G0170800ZS	0.962872	1.53011e-41	--	BnaC04g52310D [Brassica napus]
MSTRG.16426.1	BnaA01G0170800ZS	0.956629	3.1717e-39	--	BnaC04g52310D [Brassica napus]
MSTRG.50037.1	BnaA01G0170800ZS	0.953591	3.22304e-38	--	BnaC04g52310D [Brassica napus]
MSTRG.75972.1	BnaA01G0170800ZS	0.951542	1.41202e-37	--	BnaC04g52310D [Brassica napus]
MSTRG.16560.1	BnaA01G0173500ZS	0.952024	1.00303e-37	SLAH2	BnaC01g20530D [Brassica napus]
MSTRG.1668.1	BnaA01G0173500ZS	0.962816	1.61023e-41	SLAH2	BnaC01g20530D [Brassica napus]
MSTRG.17885.2	BnaA01G0173500ZS	0.969203	2.44833e-44	SLAH2	BnaC01g20530D [Brassica napus]
MSTRG.19864.1	BnaA01G0173500ZS	0.964447	3.4441e-42	SLAH2	BnaC01g20530D [Brassica napus]
MSTRG.24943.1	BnaA01G0173500ZS	0.961728	4.34126e-41	SLAH2	BnaC01g20530D [Brassica napus]
MSTRG.34620.1	BnaA01G0173500ZS	0.955802	6.05737e-39	SLAH2	BnaC01g20530D [Brassica napus]
MSTRG.34621.1	BnaA01G0173500ZS	0.978424	1.11448e-49	SLAH2	BnaC01g20530D [Brassica napus]
MSTRG.40370.1	BnaA01G0173500ZS	0.97159	1.51458e-45	SLAH2	BnaC01g20530D [Brassica napus]
MSTRG.4640.1	BnaA01G0173500ZS	0.975595	7.93521e-48	SLAH2	BnaC01g20530D [Brassica napus]
MSTRG.5598.1	BnaA01G0173500ZS	0.950363	3.20931e-37	SLAH2	BnaC01g20530D [Brassica napus]
MSTRG.74235.1	BnaA01G0173500ZS	0.986972	2.75993e-57	SLAH2	BnaC01g20530D [Brassica napus]
MSTRG.74274.1	BnaA01G0173500ZS	0.985338	1.68024e-55	SLAH2	BnaC01g20530D [Brassica napus]
MSTRG.77164.1	BnaA01G0173500ZS	0.997296	4.10111e-81	SLAH2	BnaC01g20530D [Brassica napus]
MSTRG.77190.1	BnaA01G0173500ZS	0.955763	6.24479e-39	SLAH2	BnaC01g20530D [Brassica napus]
MSTRG.77407.1	BnaA01G0173500ZS	0.956969	2.42298e-39	SLAH2	BnaC01g20530D [Brassica napus]
MSTRG.77418.1	BnaA01G0173500ZS	0.972021	8.933e-46	SLAH2	BnaC01g20530D [Brassica napus]
MSTRG.77453.1	BnaA01G0173500ZS	0.958997	4.62812e-40	SLAH2	BnaC01g20530D [Brassica napus]
MSTRG.77707.1	BnaA01G0173500ZS	0.954059	2.27725e-38	SLAH2	BnaC01g20530D [Brassica napus]
MSTRG.77919.1	BnaA01G0173500ZS	0.960729	1.05199e-40	SLAH2	BnaC01g20530D [Brassica napus]
MSTRG.84438.1	BnaA01G0173500ZS	0.969157	2.57732e-44	SLAH2	BnaC01g20530D [Brassica napus]
MSTRG.8596.1	BnaA01G0173500ZS	0.95107	1.96584e-37	SLAH2	BnaC01g20530D [Brassica napus]
MSTRG.91202.1	BnaA01G0173500ZS	0.974351	4.42497e-47	SLAH2	BnaC01g20530D [Brassica napus]
MSTRG.92975.2	BnaA01G0173500ZS	0.981638	4.15817e-52	SLAH2	BnaC01g20530D [Brassica napus]
MSTRG.38786.1	BnaA01G0178200ZS	0.951757	1.21314e-37	--	BnaA02g14590D [Brassica napus]
MSTRG.46364.1	BnaA01G0178200ZS	0.95401	2.36308e-38	--	BnaA02g14590D [Brassica napus]
MSTRG.50037.1	BnaA01G0178200ZS	0.96042	1.37699e-40	--	BnaA02g14590D [Brassica napus]
MSTRG.53510.1	BnaA01G0178200ZS	0.97662	1.7975e-48	--	BnaA02g14590D [Brassica napus]
MSTRG.80369.1	BnaA01G0178200ZS	0.964645	2.84195e-42	--	BnaA02g14590D [Brassica napus]
MSTRG.80582.1	BnaA01G0178200ZS	0.959401	3.29326e-40	--	BnaA02g14590D [Brassica napus]
MSTRG.8415.1	BnaA01G0178200ZS	0.980185	5.82646e-51	--	BnaA02g14590D [Brassica napus]
MSTRG.98158.4	BnaA01G0178200ZS	0.962453	2.24856e-41	--	BnaA02g14590D [Brassica napus]
MSTRG.99321.1	BnaA01G0178200ZS	0.951813	1.16557e-37	--	BnaA02g14590D [Brassica napus]
MSTRG.13783.1	BnaA01G0186700ZS	0.955379	8.39332e-39	CYS4	cysteine proteinase inhibitor 4 [Brassica napus]
MSTRG.32319.1	BnaA01G0186700ZS	0.960905	9.0139e-41	CYS4	cysteine proteinase inhibitor 4 [Brassica napus]
MSTRG.3255.2	BnaA01G0186700ZS	0.962825	1.59734e-41	CYS4	cysteine proteinase inhibitor 4 [Brassica napus]
MSTRG.42636.1	BnaA01G0186700ZS	0.958884	5.08595e-40	CYS4	cysteine proteinase inhibitor 4 [Brassica napus]
MSTRG.49700.1	BnaA01G0186700ZS	0.959864	2.22244e-40	CYS4	cysteine proteinase inhibitor 4 [Brassica napus]
MSTRG.52502.1	BnaA01G0186700ZS	0.957024	2.31869e-39	CYS4	cysteine proteinase inhibitor 4 [Brassica napus]
MSTRG.53597.2	BnaA01G0186700ZS	0.971075	2.81529e-45	CYS4	cysteine proteinase inhibitor 4 [Brassica napus]
MSTRG.53615.1	BnaA01G0186700ZS	0.961938	3.59262e-41	CYS4	cysteine proteinase inhibitor 4 [Brassica napus]
MSTRG.77133.1	BnaA01G0186700ZS	0.961146	7.28669e-41	CYS4	cysteine proteinase inhibitor 4 [Brassica napus]
MSTRG.77795.1	BnaA01G0186700ZS	0.950542	2.83665e-37	CYS4	cysteine proteinase inhibitor 4 [Brassica napus]
MSTRG.87992.1	BnaA01G0186700ZS	0.953556	3.3058e-38	CYS4	cysteine proteinase inhibitor 4 [Brassica napus]
MSTRG.95481.3	BnaA01G0186700ZS	0.953692	2.98954e-38	CYS4	cysteine proteinase inhibitor 4 [Brassica napus]
MSTRG.62334.1	BnaA01G0189100ZS	0.951986	1.03065e-37	FCA	flowering time control protein FCA-like [Brassica napus]
MSTRG.35233.1	BnaA01G0190500ZS	0.959366	3.39319e-40	NSF	vesicle-fusing ATPase [Brassica rapa]
MSTRG.30612.1	BnaA01G0191700ZS	0.952953	5.13951e-38	HST	BnaA01g18180D [Brassica napus]
MSTRG.10651.1	BnaA01G0197000ZS	0.953623	3.14589e-38	Os06g0358800	BnaA01g18620D [Brassica napus]
MSTRG.13783.1	BnaA01G0197000ZS	0.973699	1.05373e-46	Os06g0358800	BnaA01g18620D [Brassica napus]
MSTRG.15257.3	BnaA01G0197000ZS	0.95631	4.07864e-39	Os06g0358800	BnaA01g18620D [Brassica napus]
MSTRG.25304.1	BnaA01G0197000ZS	0.950823	2.33595e-37	Os06g0358800	BnaA01g18620D [Brassica napus]
MSTRG.32319.1	BnaA01G0197000ZS	0.977276	6.7093e-49	Os06g0358800	BnaA01g18620D [Brassica napus]
MSTRG.3255.2	BnaA01G0197000ZS	0.968868	3.55738e-44	Os06g0358800	BnaA01g18620D [Brassica napus]
MSTRG.42636.1	BnaA01G0197000ZS	0.953854	2.65318e-38	Os06g0358800	BnaA01g18620D [Brassica napus]
MSTRG.45508.2	BnaA01G0197000ZS	0.950866	2.26691e-37	Os06g0358800	BnaA01g18620D [Brassica napus]
MSTRG.49700.1	BnaA01G0197000ZS	0.966071	6.88951e-43	Os06g0358800	BnaA01g18620D [Brassica napus]
MSTRG.52502.1	BnaA01G0197000ZS	0.984438	1.33071e-54	Os06g0358800	BnaA01g18620D [Brassica napus]
MSTRG.56930.1	BnaA01G0197000ZS	0.954623	1.49187e-38	Os06g0358800	BnaA01g18620D [Brassica napus]
MSTRG.57115.1	BnaA01G0197000ZS	0.970731	4.23473e-45	Os06g0358800	BnaA01g18620D [Brassica napus]
MSTRG.57280.1	BnaA01G0197000ZS	0.952676	6.28106e-38	Os06g0358800	BnaA01g18620D [Brassica napus]
MSTRG.57663.1	BnaA01G0197000ZS	0.960121	1.78184e-40	Os06g0358800	BnaA01g18620D [Brassica napus]
MSTRG.59649.1	BnaA01G0197000ZS	0.964661	2.79899e-42	Os06g0358800	BnaA01g18620D [Brassica napus]
MSTRG.62949.1	BnaA01G0197000ZS	0.957024	2.31812e-39	Os06g0358800	BnaA01g18620D [Brassica napus]
MSTRG.69703.1	BnaA01G0197000ZS	0.954337	1.85107e-38	Os06g0358800	BnaA01g18620D [Brassica napus]
MSTRG.70049.1	BnaA01G0197000ZS	0.955948	5.41066e-39	Os06g0358800	BnaA01g18620D [Brassica napus]
MSTRG.70492.1	BnaA01G0197000ZS	0.955916	5.54699e-39	Os06g0358800	BnaA01g18620D [Brassica napus]
MSTRG.70756.1	BnaA01G0197000ZS	0.952729	6.04735e-38	Os06g0358800	BnaA01g18620D [Brassica napus]
MSTRG.74242.1	BnaA01G0197000ZS	0.9615	5.32064e-41	Os06g0358800	BnaA01g18620D [Brassica napus]
MSTRG.83171.1	BnaA01G0197000ZS	0.956159	4.58943e-39	Os06g0358800	BnaA01g18620D [Brassica napus]
MSTRG.83852.1	BnaA01G0197000ZS	0.952602	6.6271e-38	Os06g0358800	BnaA01g18620D [Brassica napus]
MSTRG.95481.3	BnaA01G0197000ZS	0.95245	7.39507e-38	Os06g0358800	BnaA01g18620D [Brassica napus]
MSTRG.57809.1	BnaA01G0197200ZS	0.954705	1.40323e-38	CYP708A2	BnaA01g18640D [Brassica napus]
MSTRG.82883.1	BnaA01G0197200ZS	0.964972	2.06494e-42	CYP708A2	BnaA01g18640D [Brassica napus]
MSTRG.88294.1	BnaA01G0197200ZS	0.954576	1.54672e-38	CYP708A2	BnaA01g18640D [Brassica napus]
MSTRG.42279.1	BnaA01G0204700ZS	0.958731	5.77558e-40	CIPK4	BnaA01g19210D [Brassica napus]
MSTRG.57644.1	BnaA01G0204800ZS	0.96269	1.80946e-41	CIPK4	BnaC01g23130D [Brassica napus]
MSTRG.72308.1	BnaA01G0210600ZS	0.95026	3.44471e-37	UGT72E1	UDP-glycosyltransferase 72E1 [Brassica rapa]
MSTRG.20675.1	BnaA01G0216300ZS	0.956401	3.79481e-39	--	BSD domain-containing protein [Arabidopsis thaliana]
MSTRG.46912.1	BnaA01G0216300ZS	0.961896	3.73266e-41	--	BSD domain-containing protein [Arabidopsis thaliana]
MSTRG.31979.1	BnaA01G0219200ZS	0.957372	1.75444e-39	PME34	probable pectinesterase/pectinesterase inhibitor 34 [Brassica rapa]
MSTRG.21947.1	BnaA01G0219700ZS	0.956589	3.2738e-39	WSD1	O-acyltransferase WSD1-like [Brassica napus]
MSTRG.61557.1	BnaA01G0219700ZS	0.961376	5.94348e-41	WSD1	O-acyltransferase WSD1-like [Brassica napus]
MSTRG.18899.1	BnaA01G0227000ZS	0.98129	7.97246e-52	ABCA7	ABC transporter A family member 7 [Brassica napus]
MSTRG.39762.1	BnaA01G0227000ZS	0.992005	1.13353e-64	ABCA7	ABC transporter A family member 7 [Brassica napus]
MSTRG.46897.1	BnaA01G0227000ZS	0.991944	1.48182e-64	ABCA7	ABC transporter A family member 7 [Brassica napus]
MSTRG.46898.1	BnaA01G0227000ZS	0.971681	1.35464e-45	ABCA7	ABC transporter A family member 7 [Brassica napus]
MSTRG.47318.1	BnaA01G0227000ZS	0.989148	4.77469e-60	ABCA7	ABC transporter A family member 7 [Brassica napus]
MSTRG.49714.1	BnaA01G0227000ZS	0.962055	3.23139e-41	ABCA7	ABC transporter A family member 7 [Brassica napus]
MSTRG.5369.1	BnaA01G0227000ZS	0.973678	1.08425e-46	ABCA7	ABC transporter A family member 7 [Brassica napus]
MSTRG.5560.1	BnaA01G0227000ZS	0.952561	6.82501e-38	ABCA7	ABC transporter A family member 7 [Brassica napus]
MSTRG.66329.1	BnaA01G0227000ZS	0.960585	1.19249e-40	ABCA7	ABC transporter A family member 7 [Brassica napus]
MSTRG.71694.2	BnaA01G0227000ZS	0.984836	5.41428e-55	ABCA7	ABC transporter A family member 7 [Brassica napus]
MSTRG.7683.1	BnaA01G0227000ZS	0.970999	3.08105e-45	ABCA7	ABC transporter A family member 7 [Brassica napus]
MSTRG.86753.1	BnaA01G0227000ZS	0.969748	1.32245e-44	ABCA7	ABC transporter A family member 7 [Brassica napus]
MSTRG.1668.1	BnaA01G0234200ZS	0.955101	1.03873e-38	NRT2.6	high affinity nitrate transporter 2.6-like [Brassica napus]
MSTRG.24943.1	BnaA01G0234200ZS	0.985222	2.20701e-55	NRT2.6	high affinity nitrate transporter 2.6-like [Brassica napus]
MSTRG.24945.1	BnaA01G0234200ZS	0.956783	2.80702e-39	NRT2.6	high affinity nitrate transporter 2.6-like [Brassica napus]
MSTRG.33906.1	BnaA01G0234200ZS	0.968209	7.32447e-44	NRT2.6	high affinity nitrate transporter 2.6-like [Brassica napus]
MSTRG.40160.1	BnaA01G0234200ZS	0.957414	1.69659e-39	NRT2.6	high affinity nitrate transporter 2.6-like [Brassica napus]
MSTRG.45726.1	BnaA01G0234200ZS	0.952004	1.01776e-37	NRT2.6	high affinity nitrate transporter 2.6-like [Brassica napus]
MSTRG.4640.1	BnaA01G0234200ZS	0.95217	9.03883e-38	NRT2.6	high affinity nitrate transporter 2.6-like [Brassica napus]
MSTRG.58721.2	BnaA01G0234200ZS	0.961866	3.83509e-41	NRT2.6	high affinity nitrate transporter 2.6-like [Brassica napus]
MSTRG.69535.3	BnaA01G0234200ZS	0.964483	3.32802e-42	NRT2.6	high affinity nitrate transporter 2.6-like [Brassica napus]
MSTRG.74235.1	BnaA01G0234200ZS	0.956057	4.96747e-39	NRT2.6	high affinity nitrate transporter 2.6-like [Brassica napus]
MSTRG.74274.1	BnaA01G0234200ZS	0.966497	4.46021e-43	NRT2.6	high affinity nitrate transporter 2.6-like [Brassica napus]
MSTRG.77164.1	BnaA01G0234200ZS	0.954369	1.80625e-38	NRT2.6	high affinity nitrate transporter 2.6-like [Brassica napus]
MSTRG.78147.1	BnaA01G0234200ZS	0.969666	1.45265e-44	NRT2.6	high affinity nitrate transporter 2.6-like [Brassica napus]
MSTRG.84438.1	BnaA01G0234200ZS	0.960361	1.44857e-40	NRT2.6	high affinity nitrate transporter 2.6-like [Brassica napus]
MSTRG.86505.1	BnaA01G0234200ZS	0.982876	3.68764e-53	NRT2.6	high affinity nitrate transporter 2.6-like [Brassica napus]
MSTRG.88420.2	BnaA01G0234200ZS	0.955344	8.62519e-39	NRT2.6	high affinity nitrate transporter 2.6-like [Brassica napus]
MSTRG.92206.2	BnaA01G0234200ZS	0.952165	9.07411e-38	NRT2.6	high affinity nitrate transporter 2.6-like [Brassica napus]
MSTRG.99567.1	BnaA01G0234200ZS	0.962439	2.27778e-41	NRT2.6	high affinity nitrate transporter 2.6-like [Brassica napus]
MSTRG.10651.1	BnaA01G0246900ZS	0.960067	1.86745e-40	--	ethylene responsive element binding factor -related [Brassica oleracea]
MSTRG.10838.1	BnaA01G0246900ZS	0.968825	3.72896e-44	--	ethylene responsive element binding factor -related [Brassica oleracea]
MSTRG.16780.1	BnaA01G0246900ZS	0.959984	2.00508e-40	--	ethylene responsive element binding factor -related [Brassica oleracea]
MSTRG.2371.1	BnaA01G0246900ZS	0.975977	4.59846e-48	--	ethylene responsive element binding factor -related [Brassica oleracea]
MSTRG.24191.3	BnaA01G0246900ZS	0.955652	6.80553e-39	--	ethylene responsive element binding factor -related [Brassica oleracea]
MSTRG.26411.1	BnaA01G0246900ZS	0.978243	1.48935e-49	--	ethylene responsive element binding factor -related [Brassica oleracea]
MSTRG.27806.1	BnaA01G0246900ZS	0.961314	6.28194e-41	--	ethylene responsive element binding factor -related [Brassica oleracea]
MSTRG.29698.1	BnaA01G0246900ZS	0.953986	2.4044e-38	--	ethylene responsive element binding factor -related [Brassica oleracea]
MSTRG.30812.1	BnaA01G0246900ZS	0.963475	8.70726e-42	--	ethylene responsive element binding factor -related [Brassica oleracea]
MSTRG.34919.1	BnaA01G0246900ZS	0.958789	5.50403e-40	--	ethylene responsive element binding factor -related [Brassica oleracea]
MSTRG.37838.1	BnaA01G0246900ZS	0.965022	1.96645e-42	--	ethylene responsive element binding factor -related [Brassica oleracea]
MSTRG.38458.1	BnaA01G0246900ZS	0.970834	3.74632e-45	--	ethylene responsive element binding factor -related [Brassica oleracea]
MSTRG.38786.1	BnaA01G0246900ZS	0.970423	6.07569e-45	--	ethylene responsive element binding factor -related [Brassica oleracea]
MSTRG.40438.1	BnaA01G0246900ZS	0.963492	8.57032e-42	--	ethylene responsive element binding factor -related [Brassica oleracea]
MSTRG.41744.1	BnaA01G0246900ZS	0.972162	7.50234e-46	--	ethylene responsive element binding factor -related [Brassica oleracea]
MSTRG.41906.1	BnaA01G0246900ZS	0.981284	8.06674e-52	--	ethylene responsive element binding factor -related [Brassica oleracea]
MSTRG.44095.1	BnaA01G0246900ZS	0.976174	3.45892e-48	--	ethylene responsive element binding factor -related [Brassica oleracea]
MSTRG.45508.2	BnaA01G0246900ZS	0.971943	9.83299e-46	--	ethylene responsive element binding factor -related [Brassica oleracea]
MSTRG.46364.1	BnaA01G0246900ZS	0.97033	6.7653e-45	--	ethylene responsive element binding factor -related [Brassica oleracea]
MSTRG.46734.1	BnaA01G0246900ZS	0.964261	4.12248e-42	--	ethylene responsive element binding factor -related [Brassica oleracea]
MSTRG.48894.1	BnaA01G0246900ZS	0.965028	1.95452e-42	--	ethylene responsive element binding factor -related [Brassica oleracea]
MSTRG.53510.1	BnaA01G0246900ZS	0.951893	1.10156e-37	--	ethylene responsive element binding factor -related [Brassica oleracea]
MSTRG.53952.1	BnaA01G0246900ZS	0.976384	2.54331e-48	--	ethylene responsive element binding factor -related [Brassica oleracea]
MSTRG.55070.2	BnaA01G0246900ZS	0.973676	1.08618e-46	--	ethylene responsive element binding factor -related [Brassica oleracea]
MSTRG.55112.1	BnaA01G0246900ZS	0.975817	5.78575e-48	--	ethylene responsive element binding factor -related [Brassica oleracea]
MSTRG.55323.1	BnaA01G0246900ZS	0.956271	4.20525e-39	--	ethylene responsive element binding factor -related [Brassica oleracea]
MSTRG.55420.1	BnaA01G0246900ZS	0.964734	2.60725e-42	--	ethylene responsive element binding factor -related [Brassica oleracea]
MSTRG.5576.1	BnaA01G0246900ZS	0.95921	3.86854e-40	--	ethylene responsive element binding factor -related [Brassica oleracea]
MSTRG.56356.1	BnaA01G0246900ZS	0.951441	1.51598e-37	--	ethylene responsive element binding factor -related [Brassica oleracea]
MSTRG.57262.1	BnaA01G0246900ZS	0.955109	1.03215e-38	--	ethylene responsive element binding factor -related [Brassica oleracea]
MSTRG.59134.1	BnaA01G0246900ZS	0.961075	7.75763e-41	--	ethylene responsive element binding factor -related [Brassica oleracea]
MSTRG.59724.1	BnaA01G0246900ZS	0.960375	1.43061e-40	--	ethylene responsive element binding factor -related [Brassica oleracea]
MSTRG.6060.1	BnaA01G0246900ZS	0.988679	2.08113e-59	--	ethylene responsive element binding factor -related [Brassica oleracea]
MSTRG.62117.1	BnaA01G0246900ZS	0.967225	2.0926e-43	--	ethylene responsive element binding factor -related [Brassica oleracea]
MSTRG.63402.1	BnaA01G0246900ZS	0.950931	2.16708e-37	--	ethylene responsive element binding factor -related [Brassica oleracea]
MSTRG.64262.1	BnaA01G0246900ZS	0.972684	3.90201e-46	--	ethylene responsive element binding factor -related [Brassica oleracea]
MSTRG.65017.1	BnaA01G0246900ZS	0.965716	9.86333e-43	--	ethylene responsive element binding factor -related [Brassica oleracea]
MSTRG.6548.1	BnaA01G0246900ZS	0.973054	2.43405e-46	--	ethylene responsive element binding factor -related [Brassica oleracea]
MSTRG.67566.1	BnaA01G0246900ZS	0.981046	1.2488e-51	--	ethylene responsive element binding factor -related [Brassica oleracea]
MSTRG.67574.1	BnaA01G0246900ZS	0.970577	5.07455e-45	--	ethylene responsive element binding factor -related [Brassica oleracea]
MSTRG.6817.1	BnaA01G0246900ZS	0.95456	1.56528e-38	--	ethylene responsive element binding factor -related [Brassica oleracea]
MSTRG.68361.1	BnaA01G0246900ZS	0.959622	2.73093e-40	--	ethylene responsive element binding factor -related [Brassica oleracea]
MSTRG.69042.1	BnaA01G0246900ZS	0.973819	9.00709e-47	--	ethylene responsive element binding factor -related [Brassica oleracea]
MSTRG.71494.1	BnaA01G0246900ZS	0.977767	3.15078e-49	--	ethylene responsive element binding factor -related [Brassica oleracea]
MSTRG.71619.1	BnaA01G0246900ZS	0.957196	2.02054e-39	--	ethylene responsive element binding factor -related [Brassica oleracea]
MSTRG.72130.1	BnaA01G0246900ZS	0.97405	6.63011e-47	--	ethylene responsive element binding factor -related [Brassica oleracea]
MSTRG.72324.1	BnaA01G0246900ZS	0.963962	5.48835e-42	--	ethylene responsive element binding factor -related [Brassica oleracea]
MSTRG.72748.1	BnaA01G0246900ZS	0.954695	1.41383e-38	--	ethylene responsive element binding factor -related [Brassica oleracea]
MSTRG.72860.1	BnaA01G0246900ZS	0.989153	4.69068e-60	--	ethylene responsive element binding factor -related [Brassica oleracea]
MSTRG.75700.1	BnaA01G0246900ZS	0.964344	3.80459e-42	--	ethylene responsive element binding factor -related [Brassica oleracea]
MSTRG.75972.1	BnaA01G0246900ZS	0.961429	5.66816e-41	--	ethylene responsive element binding factor -related [Brassica oleracea]
MSTRG.76559.1	BnaA01G0246900ZS	0.972512	4.84807e-46	--	ethylene responsive element binding factor -related [Brassica oleracea]
MSTRG.78201.4	BnaA01G0246900ZS	0.955877	5.716e-39	--	ethylene responsive element binding factor -related [Brassica oleracea]
MSTRG.80369.1	BnaA01G0246900ZS	0.953772	2.81868e-38	--	ethylene responsive element binding factor -related [Brassica oleracea]
MSTRG.80581.1	BnaA01G0246900ZS	0.97439	4.19823e-47	--	ethylene responsive element binding factor -related [Brassica oleracea]
MSTRG.80582.1	BnaA01G0246900ZS	0.955495	7.67865e-39	--	ethylene responsive element binding factor -related [Brassica oleracea]
MSTRG.80585.2	BnaA01G0246900ZS	0.964975	2.05891e-42	--	ethylene responsive element binding factor -related [Brassica oleracea]
MSTRG.81852.1	BnaA01G0246900ZS	0.967088	2.41606e-43	--	ethylene responsive element binding factor -related [Brassica oleracea]
MSTRG.82574.1	BnaA01G0246900ZS	0.968332	6.40904e-44	--	ethylene responsive element binding factor -related [Brassica oleracea]
MSTRG.84593.1	BnaA01G0246900ZS	0.956983	2.39428e-39	--	ethylene responsive element binding factor -related [Brassica oleracea]
MSTRG.88494.1	BnaA01G0246900ZS	0.964757	2.54809e-42	--	ethylene responsive element binding factor -related [Brassica oleracea]
MSTRG.8865.1	BnaA01G0246900ZS	0.960419	1.37804e-40	--	ethylene responsive element binding factor -related [Brassica oleracea]
MSTRG.91858.1	BnaA01G0246900ZS	0.969657	1.46756e-44	--	ethylene responsive element binding factor -related [Brassica oleracea]
MSTRG.91869.1	BnaA01G0246900ZS	0.972631	4.16983e-46	--	ethylene responsive element binding factor -related [Brassica oleracea]
MSTRG.91929.1	BnaA01G0246900ZS	0.955434	8.04592e-39	--	ethylene responsive element binding factor -related [Brassica oleracea]
MSTRG.92367.1	BnaA01G0246900ZS	0.960185	1.68608e-40	--	ethylene responsive element binding factor -related [Brassica oleracea]
MSTRG.92489.1	BnaA01G0246900ZS	0.990595	3.26607e-62	--	ethylene responsive element binding factor -related [Brassica oleracea]
MSTRG.93833.1	BnaA01G0246900ZS	0.977652	3.7647e-49	--	ethylene responsive element binding factor -related [Brassica oleracea]
MSTRG.9527.1	BnaA01G0246900ZS	0.974452	3.86425e-47	--	ethylene responsive element binding factor -related [Brassica oleracea]
MSTRG.96207.1	BnaA01G0246900ZS	0.974214	5.3201e-47	--	ethylene responsive element binding factor -related [Brassica oleracea]
MSTRG.97980.1	BnaA01G0246900ZS	0.976697	1.60354e-48	--	ethylene responsive element binding factor -related [Brassica oleracea]
MSTRG.98621.1	BnaA01G0246900ZS	0.978373	1.20945e-49	--	ethylene responsive element binding factor -related [Brassica oleracea]
MSTRG.99321.1	BnaA01G0246900ZS	0.972531	4.73177e-46	--	ethylene responsive element binding factor -related [Brassica oleracea]
MSTRG.99671.1	BnaA01G0246900ZS	0.985126	2.76492e-55	--	ethylene responsive element binding factor -related [Brassica oleracea]
MSTRG.62533.1	BnaA01G0258900ZS	0.961121	7.454e-41	PME29	probable pectinesterase 29 [Brassica rapa]
MSTRG.96951.1	BnaA01G0258900ZS	0.96408	4.9039e-42	PME29	probable pectinesterase 29 [Brassica rapa]
MSTRG.100508.1	BnaA01G0263300ZS	0.955739	6.36382e-39	PUP18	probable purine permease 18 [Brassica napus]
MSTRG.15992.1	BnaA01G0263300ZS	0.950437	3.05029e-37	PUP18	probable purine permease 18 [Brassica napus]
MSTRG.16560.1	BnaA01G0263300ZS	0.970045	9.41881e-45	PUP18	probable purine permease 18 [Brassica napus]
MSTRG.1668.1	BnaA01G0263300ZS	0.986668	6.15565e-57	PUP18	probable purine permease 18 [Brassica napus]
MSTRG.18260.2	BnaA01G0263300ZS	0.958349	7.92494e-40	PUP18	probable purine permease 18 [Brassica napus]
MSTRG.18356.1	BnaA01G0263300ZS	0.955635	6.89311e-39	PUP18	probable purine permease 18 [Brassica napus]
MSTRG.19864.1	BnaA01G0263300ZS	0.958208	8.89349e-40	PUP18	probable purine permease 18 [Brassica napus]
MSTRG.24943.1	BnaA01G0263300ZS	0.975243	1.30225e-47	PUP18	probable purine permease 18 [Brassica napus]
MSTRG.3033.1	BnaA01G0263300ZS	0.952098	9.51896e-38	PUP18	probable purine permease 18 [Brassica napus]
MSTRG.33906.1	BnaA01G0263300ZS	0.979023	4.20473e-50	PUP18	probable purine permease 18 [Brassica napus]
MSTRG.34620.1	BnaA01G0263300ZS	0.95878	5.54644e-40	PUP18	probable purine permease 18 [Brassica napus]
MSTRG.34621.1	BnaA01G0263300ZS	0.960043	1.90598e-40	PUP18	probable purine permease 18 [Brassica napus]
MSTRG.35312.1	BnaA01G0263300ZS	0.964412	3.56348e-42	PUP18	probable purine permease 18 [Brassica napus]
MSTRG.40370.1	BnaA01G0263300ZS	0.976684	1.63438e-48	PUP18	probable purine permease 18 [Brassica napus]
MSTRG.44104.3	BnaA01G0263300ZS	0.957728	1.31585e-39	PUP18	probable purine permease 18 [Brassica napus]
MSTRG.4640.1	BnaA01G0263300ZS	0.970011	9.78827e-45	PUP18	probable purine permease 18 [Brassica napus]
MSTRG.5500.1	BnaA01G0263300ZS	0.953938	2.49226e-38	PUP18	probable purine permease 18 [Brassica napus]
MSTRG.57213.1	BnaA01G0263300ZS	0.95145	1.50625e-37	PUP18	probable purine permease 18 [Brassica napus]
MSTRG.58721.2	BnaA01G0263300ZS	0.962924	1.45758e-41	PUP18	probable purine permease 18 [Brassica napus]
MSTRG.69535.3	BnaA01G0263300ZS	0.976127	3.70293e-48	PUP18	probable purine permease 18 [Brassica napus]
MSTRG.74235.1	BnaA01G0263300ZS	0.989333	2.61984e-60	PUP18	probable purine permease 18 [Brassica napus]
MSTRG.74274.1	BnaA01G0263300ZS	0.972942	2.81166e-46	PUP18	probable purine permease 18 [Brassica napus]
MSTRG.77164.1	BnaA01G0263300ZS	0.986505	9.40001e-57	PUP18	probable purine permease 18 [Brassica napus]
MSTRG.77453.1	BnaA01G0263300ZS	0.990395	6.80026e-62	PUP18	probable purine permease 18 [Brassica napus]
MSTRG.77707.1	BnaA01G0263300ZS	0.968993	3.09494e-44	PUP18	probable purine permease 18 [Brassica napus]
MSTRG.78147.1	BnaA01G0263300ZS	0.982619	6.17792e-53	PUP18	probable purine permease 18 [Brassica napus]
MSTRG.84438.1	BnaA01G0263300ZS	0.9851	2.93754e-55	PUP18	probable purine permease 18 [Brassica napus]
MSTRG.84877.1	BnaA01G0263300ZS	0.956984	2.39319e-39	PUP18	probable purine permease 18 [Brassica napus]
MSTRG.85891.1	BnaA01G0263300ZS	0.96939	1.98572e-44	PUP18	probable purine permease 18 [Brassica napus]
MSTRG.86505.1	BnaA01G0263300ZS	0.975219	1.34631e-47	PUP18	probable purine permease 18 [Brassica napus]
MSTRG.88258.1	BnaA01G0263300ZS	0.972189	7.24864e-46	PUP18	probable purine permease 18 [Brassica napus]
MSTRG.88420.2	BnaA01G0263300ZS	0.950927	2.17272e-37	PUP18	probable purine permease 18 [Brassica napus]
MSTRG.88726.1	BnaA01G0263300ZS	0.966347	5.20127e-43	PUP18	probable purine permease 18 [Brassica napus]
MSTRG.91202.1	BnaA01G0263300ZS	0.970855	3.65623e-45	PUP18	probable purine permease 18 [Brassica napus]
MSTRG.92975.2	BnaA01G0263300ZS	0.977093	8.85849e-49	PUP18	probable purine permease 18 [Brassica napus]
MSTRG.99567.2	BnaA01G0263300ZS	0.95378	2.8012e-38	PUP18	probable purine permease 18 [Brassica napus]
MSTRG.99568.1	BnaA01G0263300ZS	0.968926	3.33664e-44	PUP18	probable purine permease 18 [Brassica napus]
MSTRG.11449.1	BnaA01G0275000ZS	0.97158	1.53252e-45	SOT18	cytosolic sulfotransferase 18-like [Brassica napus]
MSTRG.19088.1	BnaA01G0275000ZS	0.957953	1.09611e-39	SOT18	cytosolic sulfotransferase 18-like [Brassica napus]
MSTRG.31146.2	BnaA01G0275000ZS	0.958874	5.12554e-40	SOT18	cytosolic sulfotransferase 18-like [Brassica napus]
MSTRG.35221.3	BnaA01G0275000ZS	0.956647	3.12688e-39	SOT18	cytosolic sulfotransferase 18-like [Brassica napus]
MSTRG.37838.1	BnaA01G0275000ZS	0.951475	1.48052e-37	SOT18	cytosolic sulfotransferase 18-like [Brassica napus]
MSTRG.38458.1	BnaA01G0275000ZS	0.978393	1.17219e-49	SOT18	cytosolic sulfotransferase 18-like [Brassica napus]
MSTRG.38468.1	BnaA01G0275000ZS	0.957394	1.72322e-39	SOT18	cytosolic sulfotransferase 18-like [Brassica napus]
MSTRG.39321.1	BnaA01G0275000ZS	0.954946	1.16869e-38	SOT18	cytosolic sulfotransferase 18-like [Brassica napus]
MSTRG.52210.1	BnaA01G0275000ZS	0.962155	2.95114e-41	SOT18	cytosolic sulfotransferase 18-like [Brassica napus]
MSTRG.52215.1	BnaA01G0275000ZS	0.959972	2.02553e-40	SOT18	cytosolic sulfotransferase 18-like [Brassica napus]
MSTRG.53952.1	BnaA01G0275000ZS	0.950589	2.7472e-37	SOT18	cytosolic sulfotransferase 18-like [Brassica napus]
MSTRG.55070.2	BnaA01G0275000ZS	0.960007	1.96501e-40	SOT18	cytosolic sulfotransferase 18-like [Brassica napus]
MSTRG.55420.1	BnaA01G0275000ZS	0.961126	7.41652e-41	SOT18	cytosolic sulfotransferase 18-like [Brassica napus]
MSTRG.5576.1	BnaA01G0275000ZS	0.971149	2.57519e-45	SOT18	cytosolic sulfotransferase 18-like [Brassica napus]
MSTRG.56356.1	BnaA01G0275000ZS	0.962707	1.78204e-41	SOT18	cytosolic sulfotransferase 18-like [Brassica napus]
MSTRG.59724.1	BnaA01G0275000ZS	0.95178	1.19283e-37	SOT18	cytosolic sulfotransferase 18-like [Brassica napus]
MSTRG.6060.1	BnaA01G0275000ZS	0.961745	4.27504e-41	SOT18	cytosolic sulfotransferase 18-like [Brassica napus]
MSTRG.63402.1	BnaA01G0275000ZS	0.962142	2.98777e-41	SOT18	cytosolic sulfotransferase 18-like [Brassica napus]
MSTRG.64262.1	BnaA01G0275000ZS	0.965395	1.35869e-42	SOT18	cytosolic sulfotransferase 18-like [Brassica napus]
MSTRG.65347.1	BnaA01G0275000ZS	0.964011	5.24175e-42	SOT18	cytosolic sulfotransferase 18-like [Brassica napus]
MSTRG.6817.3	BnaA01G0275000ZS	0.962065	3.20249e-41	SOT18	cytosolic sulfotransferase 18-like [Brassica napus]
MSTRG.73771.1	BnaA01G0275000ZS	0.951888	1.1052e-37	SOT18	cytosolic sulfotransferase 18-like [Brassica napus]
MSTRG.75875.1	BnaA01G0275000ZS	0.961879	3.78952e-41	SOT18	cytosolic sulfotransferase 18-like [Brassica napus]
MSTRG.76559.1	BnaA01G0275000ZS	0.961895	3.73455e-41	SOT18	cytosolic sulfotransferase 18-like [Brassica napus]
MSTRG.78201.4	BnaA01G0275000ZS	0.965422	1.32343e-42	SOT18	cytosolic sulfotransferase 18-like [Brassica napus]
MSTRG.80581.1	BnaA01G0275000ZS	0.981765	3.26915e-52	SOT18	cytosolic sulfotransferase 18-like [Brassica napus]
MSTRG.80585.2	BnaA01G0275000ZS	0.960938	8.75595e-41	SOT18	cytosolic sulfotransferase 18-like [Brassica napus]
MSTRG.83083.1	BnaA01G0275000ZS	0.95693	2.49856e-39	SOT18	cytosolic sulfotransferase 18-like [Brassica napus]
MSTRG.84698.1	BnaA01G0275000ZS	0.956847	2.66814e-39	SOT18	cytosolic sulfotransferase 18-like [Brassica napus]
MSTRG.86652.2	BnaA01G0275000ZS	0.954901	1.20911e-38	SOT18	cytosolic sulfotransferase 18-like [Brassica napus]
MSTRG.88494.1	BnaA01G0275000ZS	0.954331	1.8584e-38	SOT18	cytosolic sulfotransferase 18-like [Brassica napus]
MSTRG.8865.1	BnaA01G0275000ZS	0.952181	8.9699e-38	SOT18	cytosolic sulfotransferase 18-like [Brassica napus]
MSTRG.91858.1	BnaA01G0275000ZS	0.958232	8.72283e-40	SOT18	cytosolic sulfotransferase 18-like [Brassica napus]
MSTRG.91929.1	BnaA01G0275000ZS	0.955788	6.12362e-39	SOT18	cytosolic sulfotransferase 18-like [Brassica napus]
MSTRG.92489.1	BnaA01G0275000ZS	0.954253	1.97101e-38	SOT18	cytosolic sulfotransferase 18-like [Brassica napus]
MSTRG.9527.1	BnaA01G0275000ZS	0.970344	6.65975e-45	SOT18	cytosolic sulfotransferase 18-like [Brassica napus]
MSTRG.98094.1	BnaA01G0275000ZS	0.96645	4.67933e-43	SOT18	cytosolic sulfotransferase 18-like [Brassica napus]
MSTRG.24966.1	BnaA01G0276000ZS	0.963402	9.32686e-42	SCRL4	defensin-like protein 245 [Brassica rapa]
MSTRG.10651.1	BnaA01G0278600ZS	0.967368	1.80008e-43	At1g61320	BnaCnng74540D [Brassica napus]
MSTRG.13783.1	BnaA01G0278600ZS	0.973696	1.05862e-46	At1g61320	BnaCnng74540D [Brassica napus]
MSTRG.31895.1	BnaA01G0278600ZS	0.960219	1.63743e-40	At1g61320	BnaCnng74540D [Brassica napus]
MSTRG.32319.1	BnaA01G0278600ZS	0.966311	5.39874e-43	At1g61320	BnaCnng74540D [Brassica napus]
MSTRG.42901.1	BnaA01G0278600ZS	0.951952	1.05629e-37	At1g61320	BnaCnng74540D [Brassica napus]
MSTRG.45508.2	BnaA01G0278600ZS	0.965475	1.25558e-42	At1g61320	BnaCnng74540D [Brassica napus]
MSTRG.45791.1	BnaA01G0278600ZS	0.966272	5.61732e-43	At1g61320	BnaCnng74540D [Brassica napus]
MSTRG.49700.1	BnaA01G0278600ZS	0.96122	6.8266e-41	At1g61320	BnaCnng74540D [Brassica napus]
MSTRG.50037.1	BnaA01G0278600ZS	0.958725	5.80256e-40	At1g61320	BnaCnng74540D [Brassica napus]
MSTRG.52502.1	BnaA01G0278600ZS	0.967752	1.19727e-43	At1g61320	BnaCnng74540D [Brassica napus]
MSTRG.53609.1	BnaA01G0278600ZS	0.967787	1.15394e-43	At1g61320	BnaCnng74540D [Brassica napus]
MSTRG.53615.1	BnaA01G0278600ZS	0.959489	3.05855e-40	At1g61320	BnaCnng74540D [Brassica napus]
MSTRG.57115.1	BnaA01G0278600ZS	0.951815	1.16409e-37	At1g61320	BnaCnng74540D [Brassica napus]
MSTRG.57663.1	BnaA01G0278600ZS	0.95847	7.16696e-40	At1g61320	BnaCnng74540D [Brassica napus]
MSTRG.59649.1	BnaA01G0278600ZS	0.965986	7.51373e-43	At1g61320	BnaCnng74540D [Brassica napus]
MSTRG.60839.1	BnaA01G0278600ZS	0.963931	5.65555e-42	At1g61320	BnaCnng74540D [Brassica napus]
MSTRG.62117.1	BnaA01G0278600ZS	0.954023	2.33943e-38	At1g61320	BnaCnng74540D [Brassica napus]
MSTRG.67566.1	BnaA01G0278600ZS	0.957587	1.47484e-39	At1g61320	BnaCnng74540D [Brassica napus]
MSTRG.67873.1	BnaA01G0278600ZS	0.951556	1.39836e-37	At1g61320	BnaCnng74540D [Brassica napus]
MSTRG.69703.1	BnaA01G0278600ZS	0.959061	4.38642e-40	At1g61320	BnaCnng74540D [Brassica napus]
MSTRG.70492.1	BnaA01G0278600ZS	0.980435	3.75579e-51	At1g61320	BnaCnng74540D [Brassica napus]
MSTRG.74242.1	BnaA01G0278600ZS	0.955654	6.79438e-39	At1g61320	BnaCnng74540D [Brassica napus]
MSTRG.75558.1	BnaA01G0278600ZS	0.951051	1.9925e-37	At1g61320	BnaCnng74540D [Brassica napus]
MSTRG.80582.1	BnaA01G0278600ZS	0.969168	2.54799e-44	At1g61320	BnaCnng74540D [Brassica napus]
MSTRG.83171.1	BnaA01G0278600ZS	0.970017	9.72542e-45	At1g61320	BnaCnng74540D [Brassica napus]
MSTRG.87387.1	BnaA01G0278600ZS	0.956652	3.11556e-39	At1g61320	BnaCnng74540D [Brassica napus]
MSTRG.96207.1	BnaA01G0278600ZS	0.962034	3.29376e-41	At1g61320	BnaCnng74540D [Brassica napus]
MSTRG.13783.1	BnaA01G0278800ZS	0.955016	1.10771e-38	At1g61320	BnaCnng74540D [Brassica napus]
MSTRG.32319.1	BnaA01G0278800ZS	0.967031	2.56608e-43	At1g61320	BnaCnng74540D [Brassica napus]
MSTRG.3255.2	BnaA01G0278800ZS	0.978941	4.81266e-50	At1g61320	BnaCnng74540D [Brassica napus]
MSTRG.33349.1	BnaA01G0278800ZS	0.954517	1.61648e-38	At1g61320	BnaCnng74540D [Brassica napus]
MSTRG.42636.1	BnaA01G0278800ZS	0.968562	4.98047e-44	At1g61320	BnaCnng74540D [Brassica napus]
MSTRG.45791.1	BnaA01G0278800ZS	0.95181	1.16778e-37	At1g61320	BnaCnng74540D [Brassica napus]
MSTRG.49700.1	BnaA01G0278800ZS	0.951686	1.2756e-37	At1g61320	BnaCnng74540D [Brassica napus]
MSTRG.50037.1	BnaA01G0278800ZS	0.96878	3.92159e-44	At1g61320	BnaCnng74540D [Brassica napus]
MSTRG.52433.1	BnaA01G0278800ZS	0.954111	2.1912e-38	At1g61320	BnaCnng74540D [Brassica napus]
MSTRG.52502.1	BnaA01G0278800ZS	0.963465	8.79073e-42	At1g61320	BnaCnng74540D [Brassica napus]
MSTRG.53597.2	BnaA01G0278800ZS	0.972468	5.12224e-46	At1g61320	BnaCnng74540D [Brassica napus]
MSTRG.53609.1	BnaA01G0278800ZS	0.97747	4.9882e-49	At1g61320	BnaCnng74540D [Brassica napus]
MSTRG.53615.1	BnaA01G0278800ZS	0.973436	1.48742e-46	At1g61320	BnaCnng74540D [Brassica napus]
MSTRG.59649.1	BnaA01G0278800ZS	0.968567	4.95651e-44	At1g61320	BnaCnng74540D [Brassica napus]
MSTRG.69703.1	BnaA01G0278800ZS	0.960397	1.40462e-40	At1g61320	BnaCnng74540D [Brassica napus]
MSTRG.70492.1	BnaA01G0278800ZS	0.962846	1.56717e-41	At1g61320	BnaCnng74540D [Brassica napus]
MSTRG.72103.1	BnaA01G0278800ZS	0.954557	1.56825e-38	At1g61320	BnaCnng74540D [Brassica napus]
MSTRG.74242.1	BnaA01G0278800ZS	0.966482	4.53219e-43	At1g61320	BnaCnng74540D [Brassica napus]
MSTRG.77133.1	BnaA01G0278800ZS	0.970525	5.39005e-45	At1g61320	BnaCnng74540D [Brassica napus]
MSTRG.80582.1	BnaA01G0278800ZS	0.957301	1.85745e-39	At1g61320	BnaCnng74540D [Brassica napus]
MSTRG.95481.3	BnaA01G0278800ZS	0.969133	2.64927e-44	At1g61320	BnaCnng74540D [Brassica napus]
MSTRG.2369.1	BnaA01G0279900ZS	0.959193	3.92526e-40	MLO6	MLO-like protein 6 isoform X1 [Brassica napus]
MSTRG.35908.1	BnaA01G0281600ZS	0.95238	7.77745e-38	SCRL4	defensin-like protein 245 [Brassica rapa]
MSTRG.42636.1	BnaA01G0281600ZS	0.969041	2.93516e-44	SCRL4	defensin-like protein 245 [Brassica rapa]
MSTRG.53491.2	BnaA01G0281600ZS	0.952479	7.24316e-38	SCRL4	defensin-like protein 245 [Brassica rapa]
MSTRG.61518.1	BnaA01G0281600ZS	0.958106	9.67085e-40	SCRL4	defensin-like protein 245 [Brassica rapa]
MSTRG.34620.1	BnaA01G0282500ZS	0.95064	2.65194e-37	At1g61740	sulfite exporter TauE/SafE family protein 2-like [Brassica napus]
MSTRG.40370.1	BnaA01G0282500ZS	0.956869	2.62247e-39	At1g61740	sulfite exporter TauE/SafE family protein 2-like [Brassica napus]
MSTRG.4640.1	BnaA01G0282500ZS	0.953017	4.90641e-38	At1g61740	sulfite exporter TauE/SafE family protein 2-like [Brassica napus]
MSTRG.77164.1	BnaA01G0282500ZS	0.952935	5.20626e-38	At1g61740	sulfite exporter TauE/SafE family protein 2-like [Brassica napus]
MSTRG.84438.1	BnaA01G0282500ZS	0.952699	6.18125e-38	At1g61740	sulfite exporter TauE/SafE family protein 2-like [Brassica napus]
MSTRG.91202.1	BnaA01G0282500ZS	0.955976	5.29369e-39	At1g61740	sulfite exporter TauE/SafE family protein 2-like [Brassica napus]
MSTRG.15242.1	BnaA01G0292300ZS	0.961691	4.48773e-41	CYP89A2	cytochrome P450 89A2-like [Brassica napus]
MSTRG.57211.1	BnaA01G0292300ZS	0.963399	9.36085e-42	CYP89A2	cytochrome P450 89A2-like [Brassica napus]
MSTRG.65137.2	BnaA01G0292300ZS	0.955501	7.64269e-39	CYP89A2	cytochrome P450 89A2-like [Brassica napus]
MSTRG.75778.1	BnaA01G0292300ZS	0.967868	1.05759e-43	CYP89A2	cytochrome P450 89A2-like [Brassica napus]
MSTRG.77881.1	BnaA01G0292300ZS	0.963185	1.14296e-41	CYP89A2	cytochrome P450 89A2-like [Brassica napus]
MSTRG.8836.1	BnaA01G0292300ZS	0.975416	1.0218e-47	CYP89A2	cytochrome P450 89A2-like [Brassica napus]
MSTRG.8837.1	BnaA01G0292300ZS	0.977555	4.37353e-49	CYP89A2	cytochrome P450 89A2-like [Brassica napus]
MSTRG.89065.1	BnaA01G0292300ZS	0.955045	1.08421e-38	CYP89A2	cytochrome P450 89A2-like [Brassica napus]
MSTRG.90004.1	BnaA01G0292300ZS	0.958041	1.01979e-39	CYP89A2	cytochrome P450 89A2-like [Brassica napus]
MSTRG.64597.1	BnaA01G0299800ZS	0.950045	3.99309e-37	PAP85	BnaA01g24560D [Brassica napus]
MSTRG.52846.2	BnaA01G0300300ZS	0.965685	1.01766e-42	At2g13820	non-specific lipid-transfer protein-like protein At2g13820 [Brassica napus]
MSTRG.66176.1	BnaA01G0306300ZS	0.962081	3.15668e-41	UGT84A2	UDP-glycosyltransferase 84A2 isoform X1 [Brassica napus]
MSTRG.40595.1	BnaA01G0307100ZS	0.953133	4.50947e-38	JAL36	jacalin-related lectin 36 [Brassica rapa]
MSTRG.82168.1	BnaA01G0307100ZS	0.952729	6.04538e-38	JAL36	jacalin-related lectin 36 [Brassica rapa]
MSTRG.31119.1	BnaA01G0307200ZS	0.956237	4.31868e-39	BGLU19	beta-glucosidase 19 [Brassica rapa]
MSTRG.44338.1	BnaA01G0307200ZS	0.965969	7.64272e-43	BGLU19	beta-glucosidase 19 [Brassica rapa]
MSTRG.64764.2	BnaA01G0307200ZS	0.969554	1.64908e-44	BGLU19	beta-glucosidase 19 [Brassica rapa]
MSTRG.88393.1	BnaA01G0307200ZS	0.963835	6.1978e-42	BGLU19	beta-glucosidase 19 [Brassica rapa]
MSTRG.79559.1	BnaA01G0307900ZS	0.951372	1.59146e-37	MKK5	mitogen-activated protein kinase kinase 5 [Brassica napus]
MSTRG.53865.1	BnaA01G0312300ZS	0.961606	4.84234e-41	FIE	polycomb group protein FERTILIZATION-INDEPENDENT ENDOSPERM [Brassica rapa]
MSTRG.57662.1	BnaA01G0312300ZS	0.961094	7.62876e-41	FIE	polycomb group protein FERTILIZATION-INDEPENDENT ENDOSPERM [Brassica rapa]
MSTRG.96951.1	BnaA01G0312300ZS	0.953016	4.91021e-38	FIE	polycomb group protein FERTILIZATION-INDEPENDENT ENDOSPERM [Brassica rapa]
MSTRG.97336.1	BnaA01G0312300ZS	0.958642	6.21651e-40	FIE	polycomb group protein FERTILIZATION-INDEPENDENT ENDOSPERM [Brassica rapa]
MSTRG.15726.1	BnaA01G0314600ZS	0.968772	3.95364e-44	UBP12	probable inactive serine/threonine-protein kinase fnkC [Brassica napus]
MSTRG.40257.1	BnaA01G0316500ZS	0.955635	6.89548e-39	TOM40-1	BnaA01g25720D [Brassica napus]
MSTRG.81256.1	BnaA01G0317800ZS	0.952303	8.21643e-38	At3g19850	BnaA01g25860D [Brassica napus]
MSTRG.10827.1	BnaA01G0322000ZS	0.95918	3.96961e-40	IPT8	adenylate isopentenyltransferase 8, chloroplastic [Brassica rapa]
MSTRG.32318.1	BnaA01G0322000ZS	0.954689	1.41951e-38	IPT8	adenylate isopentenyltransferase 8, chloroplastic [Brassica rapa]
MSTRG.44378.1	BnaA01G0322000ZS	0.955329	8.72416e-39	IPT8	adenylate isopentenyltransferase 8, chloroplastic [Brassica rapa]
MSTRG.77133.1	BnaA01G0322000ZS	0.952593	6.66991e-38	IPT8	adenylate isopentenyltransferase 8, chloroplastic [Brassica rapa]
MSTRG.87992.1	BnaA01G0322000ZS	0.950221	3.53911e-37	IPT8	adenylate isopentenyltransferase 8, chloroplastic [Brassica rapa]
MSTRG.96951.1	BnaA01G0322000ZS	0.967011	2.62038e-43	IPT8	adenylate isopentenyltransferase 8, chloroplastic [Brassica rapa]
MSTRG.97336.1	BnaA01G0322000ZS	0.953991	2.39518e-38	IPT8	adenylate isopentenyltransferase 8, chloroplastic [Brassica rapa]
MSTRG.31104.1	BnaA01G0332000ZS	0.971694	1.33369e-45	At3g17710	F-box protein At3g17710-like [Brassica napus]
MSTRG.44378.1	BnaA01G0332000ZS	0.96702	2.59361e-43	At3g17710	F-box protein At3g17710-like [Brassica napus]
MSTRG.45977.1	BnaA01G0332000ZS	0.95293	5.22753e-38	At3g17710	F-box protein At3g17710-like [Brassica napus]
MSTRG.52531.1	BnaA01G0332000ZS	0.9513	1.67413e-37	At3g17710	F-box protein At3g17710-like [Brassica napus]
MSTRG.53865.1	BnaA01G0332000ZS	0.952303	8.21867e-38	At3g17710	F-box protein At3g17710-like [Brassica napus]
MSTRG.96951.1	BnaA01G0332000ZS	0.976231	3.18382e-48	At3g17710	F-box protein At3g17710-like [Brassica napus]
MSTRG.54841.1	BnaA01G0334200ZS	0.956907	2.54494e-39	IOS1	LRR receptor-like serine/threonine-protein kinase IOS1 [Brassica rapa]
MSTRG.2371.1	BnaA01G0335500ZS	0.954397	1.76927e-38	At3g17530	BnaA01g27260D [Brassica napus]
MSTRG.17090.1	BnaA01G0336400ZS	0.950309	3.33087e-37	--	pectinesterase inhibitor [Brassica napus]
MSTRG.37342.1	BnaA01G0336400ZS	0.956942	2.47372e-39	--	pectinesterase inhibitor [Brassica napus]
MSTRG.88177.1	BnaA01G0336400ZS	0.951459	1.49642e-37	--	pectinesterase inhibitor [Brassica napus]
MSTRG.10838.1	BnaA01G0340000ZS	0.959788	2.37124e-40	ATL2	RING-H2 finger protein ATL2-like [Brassica napus]
MSTRG.23441.1	BnaA01G0340000ZS	0.953637	3.11377e-38	ATL2	RING-H2 finger protein ATL2-like [Brassica napus]
MSTRG.2371.1	BnaA01G0340000ZS	0.956326	4.02603e-39	ATL2	RING-H2 finger protein ATL2-like [Brassica napus]
MSTRG.26411.1	BnaA01G0340000ZS	0.951543	1.41097e-37	ATL2	RING-H2 finger protein ATL2-like [Brassica napus]
MSTRG.30812.1	BnaA01G0340000ZS	0.957772	1.26961e-39	ATL2	RING-H2 finger protein ATL2-like [Brassica napus]
MSTRG.33605.1	BnaA01G0340000ZS	0.964598	2.97491e-42	ATL2	RING-H2 finger protein ATL2-like [Brassica napus]
MSTRG.34919.1	BnaA01G0340000ZS	0.967139	2.29166e-43	ATL2	RING-H2 finger protein ATL2-like [Brassica napus]
MSTRG.37838.1	BnaA01G0340000ZS	0.963153	1.17776e-41	ATL2	RING-H2 finger protein ATL2-like [Brassica napus]
MSTRG.38786.1	BnaA01G0340000ZS	0.955306	8.88207e-39	ATL2	RING-H2 finger protein ATL2-like [Brassica napus]
MSTRG.45508.2	BnaA01G0340000ZS	0.964188	4.4203e-42	ATL2	RING-H2 finger protein ATL2-like [Brassica napus]
MSTRG.46696.1	BnaA01G0340000ZS	0.95196	1.04979e-37	ATL2	RING-H2 finger protein ATL2-like [Brassica napus]
MSTRG.55112.1	BnaA01G0340000ZS	0.952236	8.62346e-38	ATL2	RING-H2 finger protein ATL2-like [Brassica napus]
MSTRG.57115.1	BnaA01G0340000ZS	0.950216	3.55116e-37	ATL2	RING-H2 finger protein ATL2-like [Brassica napus]
MSTRG.57262.1	BnaA01G0340000ZS	0.964394	3.62746e-42	ATL2	RING-H2 finger protein ATL2-like [Brassica napus]
MSTRG.58556.1	BnaA01G0340000ZS	0.954172	2.09409e-38	ATL2	RING-H2 finger protein ATL2-like [Brassica napus]
MSTRG.6060.1	BnaA01G0340000ZS	0.958938	4.86124e-40	ATL2	RING-H2 finger protein ATL2-like [Brassica napus]
MSTRG.60839.1	BnaA01G0340000ZS	0.960804	9.84451e-41	ATL2	RING-H2 finger protein ATL2-like [Brassica napus]
MSTRG.62949.1	BnaA01G0340000ZS	0.958295	8.27888e-40	ATL2	RING-H2 finger protein ATL2-like [Brassica napus]
MSTRG.63768.1	BnaA01G0340000ZS	0.967397	1.74678e-43	ATL2	RING-H2 finger protein ATL2-like [Brassica napus]
MSTRG.67566.1	BnaA01G0340000ZS	0.951186	1.8129e-37	ATL2	RING-H2 finger protein ATL2-like [Brassica napus]
MSTRG.67574.1	BnaA01G0340000ZS	0.958896	5.03159e-40	ATL2	RING-H2 finger protein ATL2-like [Brassica napus]
MSTRG.67873.1	BnaA01G0340000ZS	0.980459	3.59853e-51	ATL2	RING-H2 finger protein ATL2-like [Brassica napus]
MSTRG.70492.1	BnaA01G0340000ZS	0.955904	5.59955e-39	ATL2	RING-H2 finger protein ATL2-like [Brassica napus]
MSTRG.71494.1	BnaA01G0340000ZS	0.97301	2.57529e-46	ATL2	RING-H2 finger protein ATL2-like [Brassica napus]
MSTRG.72860.1	BnaA01G0340000ZS	0.97133	2.07249e-45	ATL2	RING-H2 finger protein ATL2-like [Brassica napus]
MSTRG.80369.1	BnaA01G0340000ZS	0.953629	3.1334e-38	ATL2	RING-H2 finger protein ATL2-like [Brassica napus]
MSTRG.80582.1	BnaA01G0340000ZS	0.966811	3.22407e-43	ATL2	RING-H2 finger protein ATL2-like [Brassica napus]
MSTRG.81852.1	BnaA01G0340000ZS	0.965361	1.40548e-42	ATL2	RING-H2 finger protein ATL2-like [Brassica napus]
MSTRG.84593.1	BnaA01G0340000ZS	0.962116	3.05688e-41	ATL2	RING-H2 finger protein ATL2-like [Brassica napus]
MSTRG.87387.1	BnaA01G0340000ZS	0.958632	6.26836e-40	ATL2	RING-H2 finger protein ATL2-like [Brassica napus]
MSTRG.92367.1	BnaA01G0340000ZS	0.950417	3.09278e-37	ATL2	RING-H2 finger protein ATL2-like [Brassica napus]
MSTRG.96207.1	BnaA01G0340000ZS	0.973016	2.55664e-46	ATL2	RING-H2 finger protein ATL2-like [Brassica napus]
MSTRG.97980.1	BnaA01G0340000ZS	0.95297	5.07601e-38	ATL2	RING-H2 finger protein ATL2-like [Brassica napus]
MSTRG.99321.1	BnaA01G0340000ZS	0.962358	2.45312e-41	ATL2	RING-H2 finger protein ATL2-like [Brassica napus]
MSTRG.99671.1	BnaA01G0340000ZS	0.959549	2.90681e-40	ATL2	RING-H2 finger protein ATL2-like [Brassica napus]
MSTRG.11600.1	BnaA01G0342100ZS	0.981212	9.2095e-52	MBP2	myrosinase-binding protein 2-like [Brassica napus]
MSTRG.34204.1	BnaA01G0344700ZS	0.961282	6.46021e-41	NAI2	TSA1-like protein isoform X1 [Brassica napus]
MSTRG.44669.1	BnaA01G0344700ZS	0.95656	3.34924e-39	NAI2	TSA1-like protein isoform X1 [Brassica napus]
MSTRG.10651.1	BnaA01G0348600ZS	0.958902	5.0103e-40	HERC2	BnaA01g28890D [Brassica napus]
MSTRG.1311.1	BnaA01G0348600ZS	0.967655	1.3274e-43	HERC2	BnaA01g28890D [Brassica napus]
MSTRG.13783.1	BnaA01G0348600ZS	0.968837	3.67893e-44	HERC2	BnaA01g28890D [Brassica napus]
MSTRG.15257.3	BnaA01G0348600ZS	0.95434	1.84674e-38	HERC2	BnaA01g28890D [Brassica napus]
MSTRG.23424.1	BnaA01G0348600ZS	0.958947	4.82227e-40	HERC2	BnaA01g28890D [Brassica napus]
MSTRG.29698.1	BnaA01G0348600ZS	0.960943	8.71827e-41	HERC2	BnaA01g28890D [Brassica napus]
MSTRG.30812.1	BnaA01G0348600ZS	0.953056	4.76857e-38	HERC2	BnaA01g28890D [Brassica napus]
MSTRG.31146.2	BnaA01G0348600ZS	0.95686	2.64114e-39	HERC2	BnaA01g28890D [Brassica napus]
MSTRG.32319.1	BnaA01G0348600ZS	0.95812	9.55916e-40	HERC2	BnaA01g28890D [Brassica napus]
MSTRG.33605.1	BnaA01G0348600ZS	0.95532	8.78507e-39	HERC2	BnaA01g28890D [Brassica napus]
MSTRG.34919.1	BnaA01G0348600ZS	0.960626	1.15015e-40	HERC2	BnaA01g28890D [Brassica napus]
MSTRG.35003.1	BnaA01G0348600ZS	0.962246	2.71617e-41	HERC2	BnaA01g28890D [Brassica napus]
MSTRG.36603.1	BnaA01G0348600ZS	0.952981	5.03753e-38	HERC2	BnaA01g28890D [Brassica napus]
MSTRG.37838.1	BnaA01G0348600ZS	0.966103	6.67384e-43	HERC2	BnaA01g28890D [Brassica napus]
MSTRG.38786.1	BnaA01G0348600ZS	0.954511	1.62366e-38	HERC2	BnaA01g28890D [Brassica napus]
MSTRG.40438.1	BnaA01G0348600ZS	0.95572	6.45425e-39	HERC2	BnaA01g28890D [Brassica napus]
MSTRG.44095.1	BnaA01G0348600ZS	0.96542	1.32579e-42	HERC2	BnaA01g28890D [Brassica napus]
MSTRG.45508.2	BnaA01G0348600ZS	0.97505	1.70301e-47	HERC2	BnaA01g28890D [Brassica napus]
MSTRG.46364.1	BnaA01G0348600ZS	0.952613	6.57696e-38	HERC2	BnaA01g28890D [Brassica napus]
MSTRG.49700.1	BnaA01G0348600ZS	0.957119	2.14856e-39	HERC2	BnaA01g28890D [Brassica napus]
MSTRG.52223.1	BnaA01G0348600ZS	0.967662	1.31815e-43	HERC2	BnaA01g28890D [Brassica napus]
MSTRG.52502.1	BnaA01G0348600ZS	0.958407	7.54957e-40	HERC2	BnaA01g28890D [Brassica napus]
MSTRG.53952.1	BnaA01G0348600ZS	0.95428	1.93104e-38	HERC2	BnaA01g28890D [Brassica napus]
MSTRG.53953.1	BnaA01G0348600ZS	0.95815	9.33072e-40	HERC2	BnaA01g28890D [Brassica napus]
MSTRG.55323.1	BnaA01G0348600ZS	0.951726	1.23954e-37	HERC2	BnaA01g28890D [Brassica napus]
MSTRG.57115.1	BnaA01G0348600ZS	0.979541	1.76788e-50	HERC2	BnaA01g28890D [Brassica napus]
MSTRG.6060.1	BnaA01G0348600ZS	0.977617	3.97716e-49	HERC2	BnaA01g28890D [Brassica napus]
MSTRG.62117.1	BnaA01G0348600ZS	0.970504	5.52501e-45	HERC2	BnaA01g28890D [Brassica napus]
MSTRG.62949.1	BnaA01G0348600ZS	0.980599	2.80228e-51	HERC2	BnaA01g28890D [Brassica napus]
MSTRG.6548.1	BnaA01G0348600ZS	0.957258	1.92223e-39	HERC2	BnaA01g28890D [Brassica napus]
MSTRG.66217.2	BnaA01G0348600ZS	0.977154	8.08371e-49	HERC2	BnaA01g28890D [Brassica napus]
MSTRG.67566.1	BnaA01G0348600ZS	0.964155	4.56264e-42	HERC2	BnaA01g28890D [Brassica napus]
MSTRG.67873.1	BnaA01G0348600ZS	0.952847	5.55313e-38	HERC2	BnaA01g28890D [Brassica napus]
MSTRG.67994.1	BnaA01G0348600ZS	0.963873	5.97712e-42	HERC2	BnaA01g28890D [Brassica napus]
MSTRG.68361.1	BnaA01G0348600ZS	0.96279	1.64964e-41	HERC2	BnaA01g28890D [Brassica napus]
MSTRG.70049.1	BnaA01G0348600ZS	0.959483	3.07174e-40	HERC2	BnaA01g28890D [Brassica napus]
MSTRG.70492.1	BnaA01G0348600ZS	0.958094	9.76879e-40	HERC2	BnaA01g28890D [Brassica napus]
MSTRG.72324.1	BnaA01G0348600ZS	0.958724	5.80787e-40	HERC2	BnaA01g28890D [Brassica napus]
MSTRG.72748.1	BnaA01G0348600ZS	0.971861	1.08798e-45	HERC2	BnaA01g28890D [Brassica napus]
MSTRG.72860.1	BnaA01G0348600ZS	0.962651	1.87656e-41	HERC2	BnaA01g28890D [Brassica napus]
MSTRG.78201.2	BnaA01G0348600ZS	0.958304	8.21817e-40	HERC2	BnaA01g28890D [Brassica napus]
MSTRG.78201.4	BnaA01G0348600ZS	0.961714	4.39468e-41	HERC2	BnaA01g28890D [Brassica napus]
MSTRG.80582.1	BnaA01G0348600ZS	0.960559	1.21928e-40	HERC2	BnaA01g28890D [Brassica napus]
MSTRG.83171.1	BnaA01G0348600ZS	0.952463	7.32595e-38	HERC2	BnaA01g28890D [Brassica napus]
MSTRG.90631.1	BnaA01G0348600ZS	0.965679	1.02388e-42	HERC2	BnaA01g28890D [Brassica napus]
MSTRG.96207.1	BnaA01G0348600ZS	0.974272	4.92693e-47	HERC2	BnaA01g28890D [Brassica napus]
MSTRG.9704.1	BnaA01G0348600ZS	0.959461	3.12959e-40	HERC2	BnaA01g28890D [Brassica napus]
MSTRG.99321.1	BnaA01G0348600ZS	0.95672	2.95125e-39	HERC2	BnaA01g28890D [Brassica napus]
MSTRG.16970.1	BnaA01G0349400ZS	0.953642	3.10301e-38	At3g16530	lectin-like protein LEC [Brassica napus]
MSTRG.34242.1	BnaA01G0349400ZS	0.954274	1.94063e-38	At3g16530	lectin-like protein LEC [Brassica napus]
MSTRG.98454.1	BnaA01G0349400ZS	0.950399	3.13182e-37	At3g16530	lectin-like protein LEC [Brassica napus]
MSTRG.101901.2	BnaA01G0355700ZS	0.950343	3.25548e-37	NUP107	nuclear pore complex protein NUP107-like [Brassica napus]
MSTRG.20675.1	BnaA01G0355700ZS	0.966594	4.03795e-43	NUP107	nuclear pore complex protein NUP107-like [Brassica napus]
MSTRG.31111.1	BnaA01G0355700ZS	0.950057	3.95935e-37	NUP107	nuclear pore complex protein NUP107-like [Brassica napus]
MSTRG.62334.1	BnaA01G0355700ZS	0.972291	6.3881e-46	NUP107	nuclear pore complex protein NUP107-like [Brassica napus]
MSTRG.82883.1	BnaA01G0357400ZS	0.957641	1.41209e-39	IDD11	protein indeterminate-domain 11-like isoform X1 [Brassica napus]
MSTRG.92587.1	BnaA01G0357400ZS	0.955678	6.66843e-39	IDD11	protein indeterminate-domain 11-like isoform X1 [Brassica napus]
MSTRG.55923.1	BnaA01G0364200ZS	0.9529	5.34132e-38	ABCC6	ABC transporter C family member 6-like [Brassica rapa]
MSTRG.10651.1	BnaA01G0364600ZS	0.96306	1.28487e-41	MYB10	transcription factor MYB10 isoform X1 [Brassica rapa]
MSTRG.13783.1	BnaA01G0364600ZS	0.9691	2.74765e-44	MYB10	transcription factor MYB10 isoform X1 [Brassica rapa]
MSTRG.20023.1	BnaA01G0364600ZS	0.950424	3.07736e-37	MYB10	transcription factor MYB10 isoform X1 [Brassica rapa]
MSTRG.29698.1	BnaA01G0364600ZS	0.961144	7.3042e-41	MYB10	transcription factor MYB10 isoform X1 [Brassica rapa]
MSTRG.32319.1	BnaA01G0364600ZS	0.955701	6.54935e-39	MYB10	transcription factor MYB10 isoform X1 [Brassica rapa]
MSTRG.35003.1	BnaA01G0364600ZS	0.961753	4.24372e-41	MYB10	transcription factor MYB10 isoform X1 [Brassica rapa]
MSTRG.37838.1	BnaA01G0364600ZS	0.958088	9.81774e-40	MYB10	transcription factor MYB10 isoform X1 [Brassica rapa]
MSTRG.40438.1	BnaA01G0364600ZS	0.953828	2.70512e-38	MYB10	transcription factor MYB10 isoform X1 [Brassica rapa]
MSTRG.42901.1	BnaA01G0364600ZS	0.952213	8.76551e-38	MYB10	transcription factor MYB10 isoform X1 [Brassica rapa]
MSTRG.44095.1	BnaA01G0364600ZS	0.965769	9.35043e-43	MYB10	transcription factor MYB10 isoform X1 [Brassica rapa]
MSTRG.45508.2	BnaA01G0364600ZS	0.978082	1.92283e-49	MYB10	transcription factor MYB10 isoform X1 [Brassica rapa]
MSTRG.49700.1	BnaA01G0364600ZS	0.95475	1.356e-38	MYB10	transcription factor MYB10 isoform X1 [Brassica rapa]
MSTRG.52223.1	BnaA01G0364600ZS	0.950553	2.81654e-37	MYB10	transcription factor MYB10 isoform X1 [Brassica rapa]
MSTRG.52502.1	BnaA01G0364600ZS	0.954477	1.66547e-38	MYB10	transcription factor MYB10 isoform X1 [Brassica rapa]
MSTRG.53952.1	BnaA01G0364600ZS	0.954018	2.34901e-38	MYB10	transcription factor MYB10 isoform X1 [Brassica rapa]
MSTRG.55323.1	BnaA01G0364600ZS	0.955487	7.72831e-39	MYB10	transcription factor MYB10 isoform X1 [Brassica rapa]
MSTRG.57115.1	BnaA01G0364600ZS	0.960189	1.68128e-40	MYB10	transcription factor MYB10 isoform X1 [Brassica rapa]
MSTRG.6060.1	BnaA01G0364600ZS	0.966082	6.81331e-43	MYB10	transcription factor MYB10 isoform X1 [Brassica rapa]
MSTRG.62117.1	BnaA01G0364600ZS	0.971258	2.25993e-45	MYB10	transcription factor MYB10 isoform X1 [Brassica rapa]
MSTRG.62949.1	BnaA01G0364600ZS	0.956945	2.46944e-39	MYB10	transcription factor MYB10 isoform X1 [Brassica rapa]
MSTRG.6548.1	BnaA01G0364600ZS	0.956565	3.33754e-39	MYB10	transcription factor MYB10 isoform X1 [Brassica rapa]
MSTRG.66217.2	BnaA01G0364600ZS	0.961007	8.24048e-41	MYB10	transcription factor MYB10 isoform X1 [Brassica rapa]
MSTRG.67994.1	BnaA01G0364600ZS	0.952395	7.69237e-38	MYB10	transcription factor MYB10 isoform X1 [Brassica rapa]
MSTRG.68361.1	BnaA01G0364600ZS	0.956147	4.63205e-39	MYB10	transcription factor MYB10 isoform X1 [Brassica rapa]
MSTRG.70049.1	BnaA01G0364600ZS	0.950188	3.62154e-37	MYB10	transcription factor MYB10 isoform X1 [Brassica rapa]
MSTRG.70492.1	BnaA01G0364600ZS	0.958135	9.44262e-40	MYB10	transcription factor MYB10 isoform X1 [Brassica rapa]
MSTRG.72324.1	BnaA01G0364600ZS	0.95939	3.32436e-40	MYB10	transcription factor MYB10 isoform X1 [Brassica rapa]
MSTRG.72748.1	BnaA01G0364600ZS	0.966747	3.44604e-43	MYB10	transcription factor MYB10 isoform X1 [Brassica rapa]
MSTRG.72860.1	BnaA01G0364600ZS	0.957438	1.66289e-39	MYB10	transcription factor MYB10 isoform X1 [Brassica rapa]
MSTRG.96207.1	BnaA01G0364600ZS	0.958322	8.10177e-40	MYB10	transcription factor MYB10 isoform X1 [Brassica rapa]
MSTRG.99321.1	BnaA01G0364600ZS	0.952341	7.99785e-38	MYB10	transcription factor MYB10 isoform X1 [Brassica rapa]
MSTRG.11449.1	BnaA01G0366200ZS	0.965312	1.47646e-42	DRT100	DNA damage-repair/toleration protein DRT100-like [Brassica napus]
MSTRG.12109.1	BnaA01G0366200ZS	0.960188	1.68193e-40	DRT100	DNA damage-repair/toleration protein DRT100-like [Brassica napus]
MSTRG.13441.2	BnaA01G0366200ZS	0.972126	7.84152e-46	DRT100	DNA damage-repair/toleration protein DRT100-like [Brassica napus]
MSTRG.2829.1	BnaA01G0366200ZS	0.974051	6.6144e-47	DRT100	DNA damage-repair/toleration protein DRT100-like [Brassica napus]
MSTRG.29698.1	BnaA01G0366200ZS	0.952062	9.76196e-38	DRT100	DNA damage-repair/toleration protein DRT100-like [Brassica napus]
MSTRG.30340.1	BnaA01G0366200ZS	0.965274	1.53209e-42	DRT100	DNA damage-repair/toleration protein DRT100-like [Brassica napus]
MSTRG.35221.3	BnaA01G0366200ZS	0.9758	5.92762e-48	DRT100	DNA damage-repair/toleration protein DRT100-like [Brassica napus]
MSTRG.35436.1	BnaA01G0366200ZS	0.95899	4.65439e-40	DRT100	DNA damage-repair/toleration protein DRT100-like [Brassica napus]
MSTRG.38458.1	BnaA01G0366200ZS	0.956209	4.41282e-39	DRT100	DNA damage-repair/toleration protein DRT100-like [Brassica napus]
MSTRG.38468.1	BnaA01G0366200ZS	0.952492	7.17613e-38	DRT100	DNA damage-repair/toleration protein DRT100-like [Brassica napus]
MSTRG.41800.1	BnaA01G0366200ZS	0.959576	2.83919e-40	DRT100	DNA damage-repair/toleration protein DRT100-like [Brassica napus]
MSTRG.46986.1	BnaA01G0366200ZS	0.954016	2.3515e-38	DRT100	DNA damage-repair/toleration protein DRT100-like [Brassica napus]
MSTRG.49134.1	BnaA01G0366200ZS	0.954948	1.16662e-38	DRT100	DNA damage-repair/toleration protein DRT100-like [Brassica napus]
MSTRG.51718.1	BnaA01G0366200ZS	0.954237	1.99379e-38	DRT100	DNA damage-repair/toleration protein DRT100-like [Brassica napus]
MSTRG.52210.1	BnaA01G0366200ZS	0.972488	4.99585e-46	DRT100	DNA damage-repair/toleration protein DRT100-like [Brassica napus]
MSTRG.52215.1	BnaA01G0366200ZS	0.951088	1.9414e-37	DRT100	DNA damage-repair/toleration protein DRT100-like [Brassica napus]
MSTRG.61261.1	BnaA01G0366200ZS	0.959051	4.42299e-40	DRT100	DNA damage-repair/toleration protein DRT100-like [Brassica napus]
MSTRG.65347.1	BnaA01G0366200ZS	0.977269	6.78204e-49	DRT100	DNA damage-repair/toleration protein DRT100-like [Brassica napus]
MSTRG.6817.3	BnaA01G0366200ZS	0.954766	1.33909e-38	DRT100	DNA damage-repair/toleration protein DRT100-like [Brassica napus]
MSTRG.69829.1	BnaA01G0366200ZS	0.95493	1.18261e-38	DRT100	DNA damage-repair/toleration protein DRT100-like [Brassica napus]
MSTRG.78212.1	BnaA01G0366200ZS	0.959935	2.09058e-40	DRT100	DNA damage-repair/toleration protein DRT100-like [Brassica napus]
MSTRG.80581.1	BnaA01G0366200ZS	0.954665	1.44549e-38	DRT100	DNA damage-repair/toleration protein DRT100-like [Brassica napus]
MSTRG.84698.1	BnaA01G0366200ZS	0.975273	1.24789e-47	DRT100	DNA damage-repair/toleration protein DRT100-like [Brassica napus]
MSTRG.85888.2	BnaA01G0366200ZS	0.950088	3.87617e-37	DRT100	DNA damage-repair/toleration protein DRT100-like [Brassica napus]
MSTRG.88177.1	BnaA01G0366200ZS	0.951077	1.95664e-37	DRT100	DNA damage-repair/toleration protein DRT100-like [Brassica napus]
MSTRG.9704.1	BnaA01G0366200ZS	0.966223	5.90567e-43	DRT100	DNA damage-repair/toleration protein DRT100-like [Brassica napus]
MSTRG.15093.1	BnaA01G0370900ZS	0.958804	5.43519e-40	--	glutaredoxin-like protein [Arabidopsis thaliana]
MSTRG.16216.1	BnaA01G0370900ZS	0.964345	3.80332e-42	--	glutaredoxin-like protein [Arabidopsis thaliana]
MSTRG.21900.1	BnaA01G0370900ZS	0.950909	2.20026e-37	--	glutaredoxin-like protein [Arabidopsis thaliana]
MSTRG.61537.1	BnaA01G0370900ZS	0.955718	6.46529e-39	--	glutaredoxin-like protein [Arabidopsis thaliana]
MSTRG.6149.1	BnaA01G0371900ZS	0.950244	3.48477e-37	At3g11740	PREDICTED: protein LURP-one-related 10 [Brassica oleracea var. oleracea] [Brassica oleracea]
MSTRG.3255.2	BnaA01G0376500ZS	0.956265	4.2246e-39	MAN3	mannan endo-1,4-beta-mannosidase 3-like [Brassica napus]
MSTRG.42636.1	BnaA01G0376500ZS	0.967239	2.0616e-43	MAN3	mannan endo-1,4-beta-mannosidase 3-like [Brassica napus]
MSTRG.45791.1	BnaA01G0376500ZS	0.95287	5.45807e-38	MAN3	mannan endo-1,4-beta-mannosidase 3-like [Brassica napus]
MSTRG.50037.1	BnaA01G0376500ZS	0.955389	8.33437e-39	MAN3	mannan endo-1,4-beta-mannosidase 3-like [Brassica napus]
MSTRG.52433.1	BnaA01G0376500ZS	0.96941	1.94035e-44	MAN3	mannan endo-1,4-beta-mannosidase 3-like [Brassica napus]
MSTRG.53597.2	BnaA01G0376500ZS	0.973627	1.15893e-46	MAN3	mannan endo-1,4-beta-mannosidase 3-like [Brassica napus]
MSTRG.53609.1	BnaA01G0376500ZS	0.97174	1.26163e-45	MAN3	mannan endo-1,4-beta-mannosidase 3-like [Brassica napus]
MSTRG.56496.1	BnaA01G0376500ZS	0.955997	5.20787e-39	MAN3	mannan endo-1,4-beta-mannosidase 3-like [Brassica napus]
MSTRG.74242.1	BnaA01G0376500ZS	0.954475	1.6682e-38	MAN3	mannan endo-1,4-beta-mannosidase 3-like [Brassica napus]
MSTRG.88026.1	BnaA01G0376500ZS	0.95508	1.05547e-38	MAN3	mannan endo-1,4-beta-mannosidase 3-like [Brassica napus]
MSTRG.1311.1	BnaA01G0378500ZS	0.952717	6.1009e-38	CAT7	cationic amino acid transporter 7, chloroplastic [Brassica rapa]
MSTRG.13783.1	BnaA01G0378500ZS	0.956177	4.52339e-39	CAT7	cationic amino acid transporter 7, chloroplastic [Brassica rapa]
MSTRG.30812.1	BnaA01G0378500ZS	0.957692	1.3545e-39	CAT7	cationic amino acid transporter 7, chloroplastic [Brassica rapa]
MSTRG.34919.1	BnaA01G0378500ZS	0.954973	1.14457e-38	CAT7	cationic amino acid transporter 7, chloroplastic [Brassica rapa]
MSTRG.36603.1	BnaA01G0378500ZS	0.95252	7.02955e-38	CAT7	cationic amino acid transporter 7, chloroplastic [Brassica rapa]
MSTRG.45508.2	BnaA01G0378500ZS	0.951349	1.61741e-37	CAT7	cationic amino acid transporter 7, chloroplastic [Brassica rapa]
MSTRG.52502.1	BnaA01G0378500ZS	0.95611	4.76609e-39	CAT7	cationic amino acid transporter 7, chloroplastic [Brassica rapa]
MSTRG.57115.1	BnaA01G0378500ZS	0.965144	1.7435e-42	CAT7	cationic amino acid transporter 7, chloroplastic [Brassica rapa]
MSTRG.57280.1	BnaA01G0378500ZS	0.968797	3.8488e-44	CAT7	cationic amino acid transporter 7, chloroplastic [Brassica rapa]
MSTRG.62949.1	BnaA01G0378500ZS	0.964598	2.97623e-42	CAT7	cationic amino acid transporter 7, chloroplastic [Brassica rapa]
MSTRG.63768.1	BnaA01G0378500ZS	0.950652	2.6296e-37	CAT7	cationic amino acid transporter 7, chloroplastic [Brassica rapa]
MSTRG.69703.1	BnaA01G0378500ZS	0.964655	2.81455e-42	CAT7	cationic amino acid transporter 7, chloroplastic [Brassica rapa]
MSTRG.70492.1	BnaA01G0378500ZS	0.950263	3.43934e-37	CAT7	cationic amino acid transporter 7, chloroplastic [Brassica rapa]
MSTRG.83171.1	BnaA01G0378500ZS	0.956684	3.03656e-39	CAT7	cationic amino acid transporter 7, chloroplastic [Brassica rapa]
MSTRG.83852.1	BnaA01G0378500ZS	0.950106	3.83048e-37	CAT7	cationic amino acid transporter 7, chloroplastic [Brassica rapa]
MSTRG.87387.1	BnaA01G0378500ZS	0.969639	1.49798e-44	CAT7	cationic amino acid transporter 7, chloroplastic [Brassica rapa]
MSTRG.92662.1	BnaA01G0378500ZS	0.960291	1.53944e-40	CAT7	cationic amino acid transporter 7, chloroplastic [Brassica rapa]
MSTRG.95481.3	BnaA01G0378500ZS	0.953088	4.66039e-38	CAT7	cationic amino acid transporter 7, chloroplastic [Brassica rapa]
MSTRG.96207.1	BnaA01G0378500ZS	0.958337	7.99843e-40	CAT7	cationic amino acid transporter 7, chloroplastic [Brassica rapa]
MSTRG.6100.2	BnaA01G0386500ZS	0.956987	2.38747e-39	CALS9	callose synthase 9-like isoform X3 [Brassica napus]
MSTRG.10199.1	BnaA01G0395000ZS	0.950586	2.75263e-37	AGL80	PREDICTED: MADS-box transcription factor PHERES 2-like isoform X1 [Brassica oleracea var. oleracea] [Brassica oleracea]
MSTRG.10838.1	BnaA01G0395000ZS	0.957277	1.89319e-39	AGL80	PREDICTED: MADS-box transcription factor PHERES 2-like isoform X1 [Brassica oleracea var. oleracea] [Brassica oleracea]
MSTRG.14412.1	BnaA01G0395000ZS	0.96916	2.57114e-44	AGL80	PREDICTED: MADS-box transcription factor PHERES 2-like isoform X1 [Brassica oleracea var. oleracea] [Brassica oleracea]
MSTRG.15311.1	BnaA01G0395000ZS	0.977293	6.54087e-49	AGL80	PREDICTED: MADS-box transcription factor PHERES 2-like isoform X1 [Brassica oleracea var. oleracea] [Brassica oleracea]
MSTRG.16426.1	BnaA01G0395000ZS	0.954029	2.32914e-38	AGL80	PREDICTED: MADS-box transcription factor PHERES 2-like isoform X1 [Brassica oleracea var. oleracea] [Brassica oleracea]
MSTRG.17564.1	BnaA01G0395000ZS	0.975016	1.78493e-47	AGL80	PREDICTED: MADS-box transcription factor PHERES 2-like isoform X1 [Brassica oleracea var. oleracea] [Brassica oleracea]
MSTRG.24191.3	BnaA01G0395000ZS	0.961995	3.41361e-41	AGL80	PREDICTED: MADS-box transcription factor PHERES 2-like isoform X1 [Brassica oleracea var. oleracea] [Brassica oleracea]
MSTRG.26411.1	BnaA01G0395000ZS	0.954952	1.16363e-38	AGL80	PREDICTED: MADS-box transcription factor PHERES 2-like isoform X1 [Brassica oleracea var. oleracea] [Brassica oleracea]
MSTRG.40954.1	BnaA01G0395000ZS	0.956481	3.56588e-39	AGL80	PREDICTED: MADS-box transcription factor PHERES 2-like isoform X1 [Brassica oleracea var. oleracea] [Brassica oleracea]
MSTRG.41744.1	BnaA01G0395000ZS	0.958442	7.3381e-40	AGL80	PREDICTED: MADS-box transcription factor PHERES 2-like isoform X1 [Brassica oleracea var. oleracea] [Brassica oleracea]
MSTRG.42045.1	BnaA01G0395000ZS	0.965256	1.56008e-42	AGL80	PREDICTED: MADS-box transcription factor PHERES 2-like isoform X1 [Brassica oleracea var. oleracea] [Brassica oleracea]
MSTRG.44525.1	BnaA01G0395000ZS	0.993395	1.45474e-67	AGL80	PREDICTED: MADS-box transcription factor PHERES 2-like isoform X1 [Brassica oleracea var. oleracea] [Brassica oleracea]
MSTRG.46348.1	BnaA01G0395000ZS	0.963199	1.12879e-41	AGL80	PREDICTED: MADS-box transcription factor PHERES 2-like isoform X1 [Brassica oleracea var. oleracea] [Brassica oleracea]
MSTRG.46734.1	BnaA01G0395000ZS	0.983202	1.89204e-53	AGL80	PREDICTED: MADS-box transcription factor PHERES 2-like isoform X1 [Brassica oleracea var. oleracea] [Brassica oleracea]
MSTRG.46857.1	BnaA01G0395000ZS	0.967836	1.09421e-43	AGL80	PREDICTED: MADS-box transcription factor PHERES 2-like isoform X1 [Brassica oleracea var. oleracea] [Brassica oleracea]
MSTRG.4707.1	BnaA01G0395000ZS	0.982204	1.40169e-52	AGL80	PREDICTED: MADS-box transcription factor PHERES 2-like isoform X1 [Brassica oleracea var. oleracea] [Brassica oleracea]
MSTRG.47429.3	BnaA01G0395000ZS	0.977431	5.30003e-49	AGL80	PREDICTED: MADS-box transcription factor PHERES 2-like isoform X1 [Brassica oleracea var. oleracea] [Brassica oleracea]
MSTRG.48832.1	BnaA01G0395000ZS	0.976812	1.35099e-48	AGL80	PREDICTED: MADS-box transcription factor PHERES 2-like isoform X1 [Brassica oleracea var. oleracea] [Brassica oleracea]
MSTRG.48894.1	BnaA01G0395000ZS	0.979829	1.08054e-50	AGL80	PREDICTED: MADS-box transcription factor PHERES 2-like isoform X1 [Brassica oleracea var. oleracea] [Brassica oleracea]
MSTRG.48968.1	BnaA01G0395000ZS	0.952685	6.24224e-38	AGL80	PREDICTED: MADS-box transcription factor PHERES 2-like isoform X1 [Brassica oleracea var. oleracea] [Brassica oleracea]
MSTRG.54285.1	BnaA01G0395000ZS	0.969714	1.37531e-44	AGL80	PREDICTED: MADS-box transcription factor PHERES 2-like isoform X1 [Brassica oleracea var. oleracea] [Brassica oleracea]
MSTRG.54490.2	BnaA01G0395000ZS	0.98753	6.02222e-58	AGL80	PREDICTED: MADS-box transcription factor PHERES 2-like isoform X1 [Brassica oleracea var. oleracea] [Brassica oleracea]
MSTRG.54579.1	BnaA01G0395000ZS	0.983308	1.51876e-53	AGL80	PREDICTED: MADS-box transcription factor PHERES 2-like isoform X1 [Brassica oleracea var. oleracea] [Brassica oleracea]
MSTRG.55054.1	BnaA01G0395000ZS	0.971456	1.78134e-45	AGL80	PREDICTED: MADS-box transcription factor PHERES 2-like isoform X1 [Brassica oleracea var. oleracea] [Brassica oleracea]
MSTRG.55112.1	BnaA01G0395000ZS	0.970043	9.43661e-45	AGL80	PREDICTED: MADS-box transcription factor PHERES 2-like isoform X1 [Brassica oleracea var. oleracea] [Brassica oleracea]
MSTRG.57262.1	BnaA01G0395000ZS	0.967304	1.92687e-43	AGL80	PREDICTED: MADS-box transcription factor PHERES 2-like isoform X1 [Brassica oleracea var. oleracea] [Brassica oleracea]
MSTRG.58760.1	BnaA01G0395000ZS	0.955568	7.25798e-39	AGL80	PREDICTED: MADS-box transcription factor PHERES 2-like isoform X1 [Brassica oleracea var. oleracea] [Brassica oleracea]
MSTRG.589.1	BnaA01G0395000ZS	0.957584	1.47842e-39	AGL80	PREDICTED: MADS-box transcription factor PHERES 2-like isoform X1 [Brassica oleracea var. oleracea] [Brassica oleracea]
MSTRG.59134.1	BnaA01G0395000ZS	0.981073	1.18962e-51	AGL80	PREDICTED: MADS-box transcription factor PHERES 2-like isoform X1 [Brassica oleracea var. oleracea] [Brassica oleracea]
MSTRG.59726.1	BnaA01G0395000ZS	0.952494	7.16653e-38	AGL80	PREDICTED: MADS-box transcription factor PHERES 2-like isoform X1 [Brassica oleracea var. oleracea] [Brassica oleracea]
MSTRG.64360.1	BnaA01G0395000ZS	0.961454	5.5473e-41	AGL80	PREDICTED: MADS-box transcription factor PHERES 2-like isoform X1 [Brassica oleracea var. oleracea] [Brassica oleracea]
MSTRG.65741.1	BnaA01G0395000ZS	0.967743	1.2087e-43	AGL80	PREDICTED: MADS-box transcription factor PHERES 2-like isoform X1 [Brassica oleracea var. oleracea] [Brassica oleracea]
MSTRG.67574.1	BnaA01G0395000ZS	0.955428	8.08778e-39	AGL80	PREDICTED: MADS-box transcription factor PHERES 2-like isoform X1 [Brassica oleracea var. oleracea] [Brassica oleracea]
MSTRG.6817.1	BnaA01G0395000ZS	0.952293	8.27949e-38	AGL80	PREDICTED: MADS-box transcription factor PHERES 2-like isoform X1 [Brassica oleracea var. oleracea] [Brassica oleracea]
MSTRG.69727.3	BnaA01G0395000ZS	0.969738	1.33843e-44	AGL80	PREDICTED: MADS-box transcription factor PHERES 2-like isoform X1 [Brassica oleracea var. oleracea] [Brassica oleracea]
MSTRG.71203.1	BnaA01G0395000ZS	0.962645	1.88581e-41	AGL80	PREDICTED: MADS-box transcription factor PHERES 2-like isoform X1 [Brassica oleracea var. oleracea] [Brassica oleracea]
MSTRG.72638.1	BnaA01G0395000ZS	0.981066	1.20373e-51	AGL80	PREDICTED: MADS-box transcription factor PHERES 2-like isoform X1 [Brassica oleracea var. oleracea] [Brassica oleracea]
MSTRG.75972.1	BnaA01G0395000ZS	0.975826	5.709e-48	AGL80	PREDICTED: MADS-box transcription factor PHERES 2-like isoform X1 [Brassica oleracea var. oleracea] [Brassica oleracea]
MSTRG.81852.1	BnaA01G0395000ZS	0.959761	2.42701e-40	AGL80	PREDICTED: MADS-box transcription factor PHERES 2-like isoform X1 [Brassica oleracea var. oleracea] [Brassica oleracea]
MSTRG.84593.1	BnaA01G0395000ZS	0.97484	2.27459e-47	AGL80	PREDICTED: MADS-box transcription factor PHERES 2-like isoform X1 [Brassica oleracea var. oleracea] [Brassica oleracea]
MSTRG.85541.2	BnaA01G0395000ZS	0.970622	4.81111e-45	AGL80	PREDICTED: MADS-box transcription factor PHERES 2-like isoform X1 [Brassica oleracea var. oleracea] [Brassica oleracea]
MSTRG.91869.1	BnaA01G0395000ZS	0.956649	3.1212e-39	AGL80	PREDICTED: MADS-box transcription factor PHERES 2-like isoform X1 [Brassica oleracea var. oleracea] [Brassica oleracea]
MSTRG.97980.1	BnaA01G0395000ZS	0.967513	1.54468e-43	AGL80	PREDICTED: MADS-box transcription factor PHERES 2-like isoform X1 [Brassica oleracea var. oleracea] [Brassica oleracea]
MSTRG.98159.1	BnaA01G0395000ZS	0.95494	1.17435e-38	AGL80	PREDICTED: MADS-box transcription factor PHERES 2-like isoform X1 [Brassica oleracea var. oleracea] [Brassica oleracea]
MSTRG.17885.2	BnaA01G0401300ZS	0.978315	1.32834e-49	IAA16	PREDICTED: auxin-responsive protein IAA16-like [Brassica oleracea var. oleracea] [Brassica oleracea]
MSTRG.34621.1	BnaA01G0401300ZS	0.952131	9.29556e-38	IAA16	PREDICTED: auxin-responsive protein IAA16-like [Brassica oleracea var. oleracea] [Brassica oleracea]
MSTRG.51391.1	BnaA01G0401300ZS	0.966262	5.67713e-43	IAA16	PREDICTED: auxin-responsive protein IAA16-like [Brassica oleracea var. oleracea] [Brassica oleracea]
MSTRG.5598.1	BnaA01G0401300ZS	0.963106	1.23115e-41	IAA16	PREDICTED: auxin-responsive protein IAA16-like [Brassica oleracea var. oleracea] [Brassica oleracea]
MSTRG.74274.1	BnaA01G0401300ZS	0.950831	2.32234e-37	IAA16	PREDICTED: auxin-responsive protein IAA16-like [Brassica oleracea var. oleracea] [Brassica oleracea]
MSTRG.77164.1	BnaA01G0401300ZS	0.961966	3.50322e-41	IAA16	PREDICTED: auxin-responsive protein IAA16-like [Brassica oleracea var. oleracea] [Brassica oleracea]
MSTRG.77190.1	BnaA01G0401300ZS	0.95756	1.50752e-39	IAA16	PREDICTED: auxin-responsive protein IAA16-like [Brassica oleracea var. oleracea] [Brassica oleracea]
MSTRG.77407.1	BnaA01G0401300ZS	0.95959	2.80711e-40	IAA16	PREDICTED: auxin-responsive protein IAA16-like [Brassica oleracea var. oleracea] [Brassica oleracea]
MSTRG.77418.1	BnaA01G0401300ZS	0.984766	6.34238e-55	IAA16	PREDICTED: auxin-responsive protein IAA16-like [Brassica oleracea var. oleracea] [Brassica oleracea]
MSTRG.77919.1	BnaA01G0401300ZS	0.965051	1.90993e-42	IAA16	PREDICTED: auxin-responsive protein IAA16-like [Brassica oleracea var. oleracea] [Brassica oleracea]
MSTRG.92975.2	BnaA01G0401300ZS	0.962775	1.6738e-41	IAA16	PREDICTED: auxin-responsive protein IAA16-like [Brassica oleracea var. oleracea] [Brassica oleracea]
MSTRG.47132.1	BnaA01G0406900ZS	0.966961	2.76049e-43	--	S-protein homolog 5 [Eutrema salsugineum]
MSTRG.4776.1	BnaA01G0413100ZS	0.953587	3.23261e-38	At1g65240	PREDICTED: aspartic proteinase-like protein 2 isoform X1 [Brassica oleracea var. oleracea] [Brassica oleracea]
MSTRG.98081.1	BnaA01G0413100ZS	0.963461	8.82392e-42	At1g65240	PREDICTED: aspartic proteinase-like protein 2 isoform X1 [Brassica oleracea var. oleracea] [Brassica oleracea]
MSTRG.6385.4	BnaA01G0413900ZS	0.961463	5.50252e-41	At3g02650	pentatricopeptide repeat-containing protein At3g02650, mitochondrial-like [Brassica napus]
MSTRG.17143.2	BnaA01G0414000ZS	0.96762	1.37799e-43	At3g02645	BnaAnng26050D [Brassica napus]
MSTRG.43863.1	BnaA01G0414000ZS	0.965931	7.94104e-43	At3g02645	BnaAnng26050D [Brassica napus]
MSTRG.57206.2	BnaA01G0414000ZS	0.969644	1.48975e-44	At3g02645	BnaAnng26050D [Brassica napus]
MSTRG.66184.1	BnaA01G0414000ZS	0.959094	4.26507e-40	At3g02645	BnaAnng26050D [Brassica napus]
MSTRG.39895.1	BnaA01G0415000ZS	0.97105	2.89857e-45	UVR8	ultraviolet-B receptor UVR8-like [Brassica napus]
MSTRG.90509.1	BnaA01G0415000ZS	0.975781	6.09009e-48	UVR8	ultraviolet-B receptor UVR8-like [Brassica napus]
MSTRG.94757.2	BnaA01G0415000ZS	0.953275	4.06283e-38	UVR8	ultraviolet-B receptor UVR8-like [Brassica napus]
MSTRG.6380.3	BnaA01G0417100ZS	0.950135	3.7537e-37	RPK2	PREDICTED: LRR receptor-like serine/threonine-protein kinase RPK2 [Brassica oleracea var. oleracea] [Brassica oleracea]
MSTRG.6385.4	BnaA01G0417100ZS	0.969926	1.07927e-44	RPK2	PREDICTED: LRR receptor-like serine/threonine-protein kinase RPK2 [Brassica oleracea var. oleracea] [Brassica oleracea]
MSTRG.6427.1	BnaA01G0417100ZS	0.953577	3.25441e-38	RPK2	PREDICTED: LRR receptor-like serine/threonine-protein kinase RPK2 [Brassica oleracea var. oleracea] [Brassica oleracea]
MSTRG.6427.1	BnaA01G0417400ZS	0.951738	1.22925e-37	MPPbeta	PREDICTED: probable mitochondrial-processing peptidase subunit beta [Brassica oleracea var. oleracea] [Brassica oleracea]
MSTRG.6385.4	BnaA01G0419800ZS	0.957196	2.02026e-39	SNL1	paired amphipathic helix protein Sin3-like 1 isoform X2 [Brassica napus]
MSTRG.1742.1	BnaA01G0420700ZS	0.964036	5.11553e-42	MBD9	methyl-CpG-binding domain-containing protein 9 isoform X2 [Brassica napus]
MSTRG.6030.1	BnaA01G0420700ZS	0.951761	1.20977e-37	MBD9	methyl-CpG-binding domain-containing protein 9 isoform X2 [Brassica napus]
MSTRG.6385.4	BnaA01G0420700ZS	0.961642	4.68744e-41	MBD9	methyl-CpG-binding domain-containing protein 9 isoform X2 [Brassica napus]
MSTRG.94206.1	BnaA01G0420700ZS	0.959753	2.44275e-40	MBD9	methyl-CpG-binding domain-containing protein 9 isoform X2 [Brassica napus]
MSTRG.17143.2	BnaA01G0420800ZS	0.967629	1.36538e-43	HAT5	PREDICTED: homeobox-leucine zipper protein HAT5-like [Brassica oleracea var. oleracea] [Brassica oleracea]
MSTRG.25730.1	BnaA01G0420800ZS	0.966547	4.23548e-43	HAT5	PREDICTED: homeobox-leucine zipper protein HAT5-like [Brassica oleracea var. oleracea] [Brassica oleracea]
MSTRG.43863.1	BnaA01G0420800ZS	0.969003	3.0604e-44	HAT5	PREDICTED: homeobox-leucine zipper protein HAT5-like [Brassica oleracea var. oleracea] [Brassica oleracea]
MSTRG.46249.1	BnaA01G0420800ZS	0.965327	1.45387e-42	HAT5	PREDICTED: homeobox-leucine zipper protein HAT5-like [Brassica oleracea var. oleracea] [Brassica oleracea]
MSTRG.5424.3	BnaA01G0420800ZS	0.964926	2.15982e-42	HAT5	PREDICTED: homeobox-leucine zipper protein HAT5-like [Brassica oleracea var. oleracea] [Brassica oleracea]
MSTRG.57206.2	BnaA01G0420800ZS	0.971283	2.19492e-45	HAT5	PREDICTED: homeobox-leucine zipper protein HAT5-like [Brassica oleracea var. oleracea] [Brassica oleracea]
MSTRG.66184.1	BnaA01G0420800ZS	0.97076	4.08786e-45	HAT5	PREDICTED: homeobox-leucine zipper protein HAT5-like [Brassica oleracea var. oleracea] [Brassica oleracea]
MSTRG.6030.1	BnaA01G0421400ZS	0.950251	3.46633e-37	RH41	PREDICTED: DEAD-box ATP-dependent RNA helicase 41 [Brassica oleracea var. oleracea] [Brassica oleracea]
MSTRG.6385.4	BnaA01G0421400ZS	0.974377	4.27452e-47	RH41	PREDICTED: DEAD-box ATP-dependent RNA helicase 41 [Brassica oleracea var. oleracea] [Brassica oleracea]
MSTRG.6427.1	BnaA01G0421400ZS	0.951464	1.49162e-37	RH41	PREDICTED: DEAD-box ATP-dependent RNA helicase 41 [Brassica oleracea var. oleracea] [Brassica oleracea]
MSTRG.17143.2	BnaA01G0421600ZS	0.958209	8.88793e-40	POT4	PREDICTED: potassium transporter 4 [Brassica oleracea var. oleracea] [Brassica oleracea]
MSTRG.31228.1	BnaA01G0421600ZS	0.968338	6.3675e-44	POT4	PREDICTED: potassium transporter 4 [Brassica oleracea var. oleracea] [Brassica oleracea]
MSTRG.57206.2	BnaA01G0421600ZS	0.958682	6.013e-40	POT4	PREDICTED: potassium transporter 4 [Brassica oleracea var. oleracea] [Brassica oleracea]
MSTRG.6030.1	BnaA01G0421600ZS	0.960104	1.8091e-40	POT4	PREDICTED: potassium transporter 4 [Brassica oleracea var. oleracea] [Brassica oleracea]
MSTRG.6101.1	BnaA01G0421600ZS	0.9813	7.82781e-52	POT4	PREDICTED: potassium transporter 4 [Brassica oleracea var. oleracea] [Brassica oleracea]
MSTRG.6385.4	BnaA01G0421600ZS	0.973331	1.70469e-46	POT4	PREDICTED: potassium transporter 4 [Brassica oleracea var. oleracea] [Brassica oleracea]
MSTRG.66184.1	BnaA01G0421600ZS	0.966941	2.81699e-43	POT4	PREDICTED: potassium transporter 4 [Brassica oleracea var. oleracea] [Brassica oleracea]
MSTRG.8033.1	BnaA01G0421600ZS	0.957725	1.31912e-39	POT4	PREDICTED: potassium transporter 4 [Brassica oleracea var. oleracea] [Brassica oleracea]
MSTRG.27031.1	BnaA02G0003300ZS	0.962201	2.83074e-41	ATL74	RING-H2 finger protein ATL74 [Brassica rapa]
MSTRG.51391.1	BnaA02G0003300ZS	0.955016	1.108e-38	ATL74	RING-H2 finger protein ATL74 [Brassica rapa]
MSTRG.57756.1	BnaA02G0003300ZS	0.961998	3.40433e-41	ATL74	RING-H2 finger protein ATL74 [Brassica rapa]
MSTRG.77919.1	BnaA02G0003300ZS	0.973924	7.83538e-47	ATL74	RING-H2 finger protein ATL74 [Brassica rapa]
MSTRG.84438.1	BnaA02G0003300ZS	0.954385	1.7848e-38	ATL74	RING-H2 finger protein ATL74 [Brassica rapa]
MSTRG.8596.1	BnaA02G0003300ZS	0.961625	4.75876e-41	ATL74	RING-H2 finger protein ATL74 [Brassica rapa]
MSTRG.86503.1	BnaA02G0003300ZS	0.97262	4.23087e-46	ATL74	RING-H2 finger protein ATL74 [Brassica rapa]
MSTRG.91202.1	BnaA02G0003300ZS	0.965023	1.96483e-42	ATL74	RING-H2 finger protein ATL74 [Brassica rapa]
MSTRG.92975.2	BnaA02G0003300ZS	0.9509	2.21348e-37	ATL74	RING-H2 finger protein ATL74 [Brassica rapa]
MSTRG.27031.1	BnaA02G0003500ZS	0.962201	2.83074e-41	ATL74	RING-H2 finger protein ATL74 [Brassica rapa]
MSTRG.51391.1	BnaA02G0003500ZS	0.955016	1.108e-38	ATL74	RING-H2 finger protein ATL74 [Brassica rapa]
MSTRG.57756.1	BnaA02G0003500ZS	0.961998	3.40433e-41	ATL74	RING-H2 finger protein ATL74 [Brassica rapa]
MSTRG.77919.1	BnaA02G0003500ZS	0.973924	7.83538e-47	ATL74	RING-H2 finger protein ATL74 [Brassica rapa]
MSTRG.84438.1	BnaA02G0003500ZS	0.954385	1.7848e-38	ATL74	RING-H2 finger protein ATL74 [Brassica rapa]
MSTRG.8596.1	BnaA02G0003500ZS	0.961625	4.75876e-41	ATL74	RING-H2 finger protein ATL74 [Brassica rapa]
MSTRG.86503.1	BnaA02G0003500ZS	0.97262	4.23087e-46	ATL74	RING-H2 finger protein ATL74 [Brassica rapa]
MSTRG.91202.1	BnaA02G0003500ZS	0.965023	1.96483e-42	ATL74	RING-H2 finger protein ATL74 [Brassica rapa]
MSTRG.92975.2	BnaA02G0003500ZS	0.9509	2.21348e-37	ATL74	RING-H2 finger protein ATL74 [Brassica rapa]
MSTRG.4067.1	BnaA02G0005400ZS	0.970236	7.55131e-45	PDC4	pyruvate decarboxylase 4 isoform X2 [Brassica rapa]
MSTRG.10576.1	BnaA02G0008400ZS	0.956178	4.51956e-39	--	BnaCnng28770D [Brassica napus]
MSTRG.10651.1	BnaA02G0008400ZS	0.96044	1.35311e-40	--	BnaCnng28770D [Brassica napus]
MSTRG.11449.1	BnaA02G0008400ZS	0.958939	4.85496e-40	--	BnaCnng28770D [Brassica napus]
MSTRG.12109.1	BnaA02G0008400ZS	0.954662	1.44934e-38	--	BnaCnng28770D [Brassica napus]
MSTRG.14858.1	BnaA02G0008400ZS	0.962464	2.22793e-41	--	BnaCnng28770D [Brassica napus]
MSTRG.20023.1	BnaA02G0008400ZS	0.963665	7.28425e-42	--	BnaCnng28770D [Brassica napus]
MSTRG.20150.1	BnaA02G0008400ZS	0.952211	8.77654e-38	--	BnaCnng28770D [Brassica napus]
MSTRG.2829.1	BnaA02G0008400ZS	0.952739	6.00314e-38	--	BnaCnng28770D [Brassica napus]
MSTRG.30920.1	BnaA02G0008400ZS	0.983102	2.32571e-53	--	BnaCnng28770D [Brassica napus]
MSTRG.35376.1	BnaA02G0008400ZS	0.967628	1.3671e-43	--	BnaCnng28770D [Brassica napus]
MSTRG.35436.1	BnaA02G0008400ZS	0.973626	1.16074e-46	--	BnaCnng28770D [Brassica napus]
MSTRG.36223.2	BnaA02G0008400ZS	0.966214	5.95891e-43	--	BnaCnng28770D [Brassica napus]
MSTRG.37342.1	BnaA02G0008400ZS	0.952251	8.52765e-38	--	BnaCnng28770D [Brassica napus]
MSTRG.38458.1	BnaA02G0008400ZS	0.952546	6.90211e-38	--	BnaCnng28770D [Brassica napus]
MSTRG.38824.1	BnaA02G0008400ZS	0.971054	2.885e-45	--	BnaCnng28770D [Brassica napus]
MSTRG.39972.1	BnaA02G0008400ZS	0.978542	9.22412e-50	--	BnaCnng28770D [Brassica napus]
MSTRG.44095.1	BnaA02G0008400ZS	0.957893	1.15096e-39	--	BnaCnng28770D [Brassica napus]
MSTRG.46580.1	BnaA02G0008400ZS	0.964092	4.84688e-42	--	BnaCnng28770D [Brassica napus]
MSTRG.46580.2	BnaA02G0008400ZS	0.964092	4.84688e-42	--	BnaCnng28770D [Brassica napus]
MSTRG.53598.1	BnaA02G0008400ZS	0.951377	1.5863e-37	--	BnaCnng28770D [Brassica napus]
MSTRG.53952.1	BnaA02G0008400ZS	0.974349	4.44177e-47	--	BnaCnng28770D [Brassica napus]
MSTRG.55323.1	BnaA02G0008400ZS	0.957877	1.16619e-39	--	BnaCnng28770D [Brassica napus]
MSTRG.55420.1	BnaA02G0008400ZS	0.964	5.29316e-42	--	BnaCnng28770D [Brassica napus]
MSTRG.58585.1	BnaA02G0008400ZS	0.95663	3.16884e-39	--	BnaCnng28770D [Brassica napus]
MSTRG.59724.1	BnaA02G0008400ZS	0.951731	1.23492e-37	--	BnaCnng28770D [Brassica napus]
MSTRG.62117.1	BnaA02G0008400ZS	0.959872	2.20703e-40	--	BnaCnng28770D [Brassica napus]
MSTRG.63402.1	BnaA02G0008400ZS	0.958175	9.14257e-40	--	BnaCnng28770D [Brassica napus]
MSTRG.64976.1	BnaA02G0008400ZS	0.958905	4.99693e-40	--	BnaCnng28770D [Brassica napus]
MSTRG.6548.1	BnaA02G0008400ZS	0.95438	1.79207e-38	--	BnaCnng28770D [Brassica napus]
MSTRG.65695.1	BnaA02G0008400ZS	0.957242	1.94669e-39	--	BnaCnng28770D [Brassica napus]
MSTRG.67863.1	BnaA02G0008400ZS	0.95567	6.71202e-39	--	BnaCnng28770D [Brassica napus]
MSTRG.67863.2	BnaA02G0008400ZS	0.956214	4.39536e-39	--	BnaCnng28770D [Brassica napus]
MSTRG.67863.3	BnaA02G0008400ZS	0.961161	7.19476e-41	--	BnaCnng28770D [Brassica napus]
MSTRG.67863.4	BnaA02G0008400ZS	0.973027	2.5211e-46	--	BnaCnng28770D [Brassica napus]
MSTRG.70229.2	BnaA02G0008400ZS	0.962603	1.95963e-41	--	BnaCnng28770D [Brassica napus]
MSTRG.73771.1	BnaA02G0008400ZS	0.981597	4.48961e-52	--	BnaCnng28770D [Brassica napus]
MSTRG.75009.1	BnaA02G0008400ZS	0.955327	8.73738e-39	--	BnaCnng28770D [Brassica napus]
MSTRG.76559.1	BnaA02G0008400ZS	0.963965	5.47617e-42	--	BnaCnng28770D [Brassica napus]
MSTRG.76780.1	BnaA02G0008400ZS	0.953494	3.46001e-38	--	BnaCnng28770D [Brassica napus]
MSTRG.79463.2	BnaA02G0008400ZS	0.969806	1.23783e-44	--	BnaCnng28770D [Brassica napus]
MSTRG.80581.1	BnaA02G0008400ZS	0.967339	1.85702e-43	--	BnaCnng28770D [Brassica napus]
MSTRG.80585.2	BnaA02G0008400ZS	0.972191	7.23429e-46	--	BnaCnng28770D [Brassica napus]
MSTRG.80811.5	BnaA02G0008400ZS	0.964035	5.11989e-42	--	BnaCnng28770D [Brassica napus]
MSTRG.81523.1	BnaA02G0008400ZS	0.963232	1.09451e-41	--	BnaCnng28770D [Brassica napus]
MSTRG.83083.1	BnaA02G0008400ZS	0.964746	2.57728e-42	--	BnaCnng28770D [Brassica napus]
MSTRG.83083.2	BnaA02G0008400ZS	0.977475	4.94891e-49	--	BnaCnng28770D [Brassica napus]
MSTRG.83478.1	BnaA02G0008400ZS	0.950005	4.10402e-37	--	BnaCnng28770D [Brassica napus]
MSTRG.83915.1	BnaA02G0008400ZS	0.965106	1.81026e-42	--	BnaCnng28770D [Brassica napus]
MSTRG.85520.1	BnaA02G0008400ZS	0.950141	3.73774e-37	--	BnaCnng28770D [Brassica napus]
MSTRG.85935.1	BnaA02G0008400ZS	0.956299	4.11159e-39	--	BnaCnng28770D [Brassica napus]
MSTRG.86652.2	BnaA02G0008400ZS	0.95225	8.53486e-38	--	BnaCnng28770D [Brassica napus]
MSTRG.86870.1	BnaA02G0008400ZS	0.966932	2.84384e-43	--	BnaCnng28770D [Brassica napus]
MSTRG.88177.1	BnaA02G0008400ZS	0.950228	3.52137e-37	--	BnaCnng28770D [Brassica napus]
MSTRG.89840.5	BnaA02G0008400ZS	0.977456	5.09734e-49	--	BnaCnng28770D [Brassica napus]
MSTRG.92455.1	BnaA02G0008400ZS	0.955187	9.72858e-39	--	BnaCnng28770D [Brassica napus]
MSTRG.99106.1	BnaA02G0008400ZS	0.966515	4.37901e-43	--	BnaCnng28770D [Brassica napus]
MSTRG.33817.1	BnaA02G0016500ZS	0.950176	3.65123e-37	KCS19	3-ketoacyl-CoA synthase 19 [Brassica rapa]
MSTRG.1668.1	BnaA02G0019100ZS	0.981811	2.99186e-52	EXPA2	expansin-A2-like [Brassica napus]
MSTRG.18260.1	BnaA02G0019100ZS	0.952334	8.04023e-38	EXPA2	expansin-A2-like [Brassica napus]
MSTRG.18260.2	BnaA02G0019100ZS	0.980708	2.30502e-51	EXPA2	expansin-A2-like [Brassica napus]
MSTRG.18356.1	BnaA02G0019100ZS	0.952912	5.29422e-38	EXPA2	expansin-A2-like [Brassica napus]
MSTRG.19864.1	BnaA02G0019100ZS	0.965328	1.45271e-42	EXPA2	expansin-A2-like [Brassica napus]
MSTRG.23842.1	BnaA02G0019100ZS	0.95098	2.09367e-37	EXPA2	expansin-A2-like [Brassica napus]
MSTRG.24943.1	BnaA02G0019100ZS	0.957525	1.55081e-39	EXPA2	expansin-A2-like [Brassica napus]
MSTRG.3033.1	BnaA02G0019100ZS	0.953954	2.46335e-38	EXPA2	expansin-A2-like [Brassica napus]
MSTRG.33906.1	BnaA02G0019100ZS	0.984713	7.16289e-55	EXPA2	expansin-A2-like [Brassica napus]
MSTRG.35312.1	BnaA02G0019100ZS	0.959936	2.08926e-40	EXPA2	expansin-A2-like [Brassica napus]
MSTRG.35369.1	BnaA02G0019100ZS	0.954319	1.87537e-38	EXPA2	expansin-A2-like [Brassica napus]
MSTRG.40370.1	BnaA02G0019100ZS	0.961761	4.21435e-41	EXPA2	expansin-A2-like [Brassica napus]
MSTRG.44104.3	BnaA02G0019100ZS	0.97882	5.8686e-50	EXPA2	expansin-A2-like [Brassica napus]
MSTRG.44669.1	BnaA02G0019100ZS	0.96722	2.10465e-43	EXPA2	expansin-A2-like [Brassica napus]
MSTRG.5500.1	BnaA02G0019100ZS	0.961829	3.96235e-41	EXPA2	expansin-A2-like [Brassica napus]
MSTRG.58721.2	BnaA02G0019100ZS	0.958059	1.0048e-39	EXPA2	expansin-A2-like [Brassica napus]
MSTRG.69535.3	BnaA02G0019100ZS	0.961642	4.68931e-41	EXPA2	expansin-A2-like [Brassica napus]
MSTRG.74235.1	BnaA02G0019100ZS	0.985066	3.18089e-55	EXPA2	expansin-A2-like [Brassica napus]
MSTRG.74274.1	BnaA02G0019100ZS	0.965728	9.7433e-43	EXPA2	expansin-A2-like [Brassica napus]
MSTRG.77164.1	BnaA02G0019100ZS	0.961737	4.30532e-41	EXPA2	expansin-A2-like [Brassica napus]
MSTRG.77418.2	BnaA02G0019100ZS	0.950159	3.69238e-37	EXPA2	expansin-A2-like [Brassica napus]
MSTRG.77453.1	BnaA02G0019100ZS	0.983688	6.82779e-54	EXPA2	expansin-A2-like [Brassica napus]
MSTRG.77707.1	BnaA02G0019100ZS	0.983566	8.84303e-54	EXPA2	expansin-A2-like [Brassica napus]
MSTRG.78147.1	BnaA02G0019100ZS	0.976172	3.46523e-48	EXPA2	expansin-A2-like [Brassica napus]
MSTRG.84438.1	BnaA02G0019100ZS	0.963812	6.33495e-42	EXPA2	expansin-A2-like [Brassica napus]
MSTRG.84877.1	BnaA02G0019100ZS	0.965428	1.31542e-42	EXPA2	expansin-A2-like [Brassica napus]
MSTRG.85891.1	BnaA02G0019100ZS	0.950642	2.64859e-37	EXPA2	expansin-A2-like [Brassica napus]
MSTRG.86505.1	BnaA02G0019100ZS	0.964745	2.57849e-42	EXPA2	expansin-A2-like [Brassica napus]
MSTRG.88420.2	BnaA02G0019100ZS	0.960428	1.36742e-40	EXPA2	expansin-A2-like [Brassica napus]
MSTRG.88726.1	BnaA02G0019100ZS	0.985053	3.27642e-55	EXPA2	expansin-A2-like [Brassica napus]
MSTRG.91202.1	BnaA02G0019100ZS	0.959513	2.99469e-40	EXPA2	expansin-A2-like [Brassica napus]
MSTRG.99567.2	BnaA02G0019100ZS	0.960193	1.67429e-40	EXPA2	expansin-A2-like [Brassica napus]
MSTRG.99568.1	BnaA02G0019100ZS	0.97587	5.35942e-48	EXPA2	expansin-A2-like [Brassica napus]
MSTRG.18006.1	BnaA02G0026200ZS	0.951211	1.78126e-37	OlnB1	oleosin-B1-like [Brassica napus]
MSTRG.35476.2	BnaA02G0030300ZS	0.958635	6.25416e-40	At5g08670	ATP synthase subunit beta-1, mitochondrial-like [Brassica napus]
MSTRG.31119.1	BnaA02G0032400ZS	0.960585	1.19207e-40	HSP70-10	heat shock 70 kDa protein 10, mitochondrial-like [Brassica napus]
MSTRG.44338.1	BnaA02G0032400ZS	0.955647	6.82916e-39	HSP70-10	heat shock 70 kDa protein 10, mitochondrial-like [Brassica napus]
MSTRG.64764.2	BnaA02G0032400ZS	0.950466	2.99022e-37	HSP70-10	heat shock 70 kDa protein 10, mitochondrial-like [Brassica napus]
MSTRG.88393.1	BnaA02G0032400ZS	0.96454	3.14834e-42	HSP70-10	heat shock 70 kDa protein 10, mitochondrial-like [Brassica napus]
MSTRG.31104.1	BnaA02G0035400ZS	0.965635	1.06934e-42	IPS3	probable inositol 3-phosphate synthase isozyme 3 [Brassica napus]
MSTRG.42636.1	BnaA02G0035400ZS	0.956846	2.6712e-39	IPS3	probable inositol 3-phosphate synthase isozyme 3 [Brassica napus]
MSTRG.44378.1	BnaA02G0035400ZS	0.979193	3.1722e-50	IPS3	probable inositol 3-phosphate synthase isozyme 3 [Brassica napus]
MSTRG.52531.1	BnaA02G0035400ZS	0.958682	6.01284e-40	IPS3	probable inositol 3-phosphate synthase isozyme 3 [Brassica napus]
MSTRG.62533.1	BnaA02G0035400ZS	0.954768	1.33703e-38	IPS3	probable inositol 3-phosphate synthase isozyme 3 [Brassica napus]
MSTRG.87992.1	BnaA02G0035400ZS	0.951317	1.65464e-37	IPS3	probable inositol 3-phosphate synthase isozyme 3 [Brassica napus]
MSTRG.96951.1	BnaA02G0035400ZS	0.980403	3.97099e-51	IPS3	probable inositol 3-phosphate synthase isozyme 3 [Brassica napus]
MSTRG.51391.1	BnaA02G0040000ZS	0.976512	2.10851e-48	--	AT5g25460/F18G18_200 [Arabidopsis thaliana]
MSTRG.5598.1	BnaA02G0040000ZS	0.961534	5.16569e-41	--	AT5g25460/F18G18_200 [Arabidopsis thaliana]
MSTRG.77407.1	BnaA02G0040000ZS	0.958857	5.201e-40	--	AT5g25460/F18G18_200 [Arabidopsis thaliana]
MSTRG.77418.1	BnaA02G0040000ZS	0.970047	9.39512e-45	--	AT5g25460/F18G18_200 [Arabidopsis thaliana]
MSTRG.77919.1	BnaA02G0040000ZS	0.970309	6.93683e-45	--	AT5g25460/F18G18_200 [Arabidopsis thaliana]
MSTRG.79559.1	BnaA02G0040000ZS	0.951285	1.69113e-37	--	AT5g25460/F18G18_200 [Arabidopsis thaliana]
[truncated: 32,315 more rows]
