# Supplementary figures and images for: Integrated Analysis of lncRNA–mRNA Regulatory Networks Related to Lipid Metabolism in High-Oleic-Acid Rapeseed
Source: MDPI journal article supplement (doi:10.3390/ijms24076277), 2023-03-27

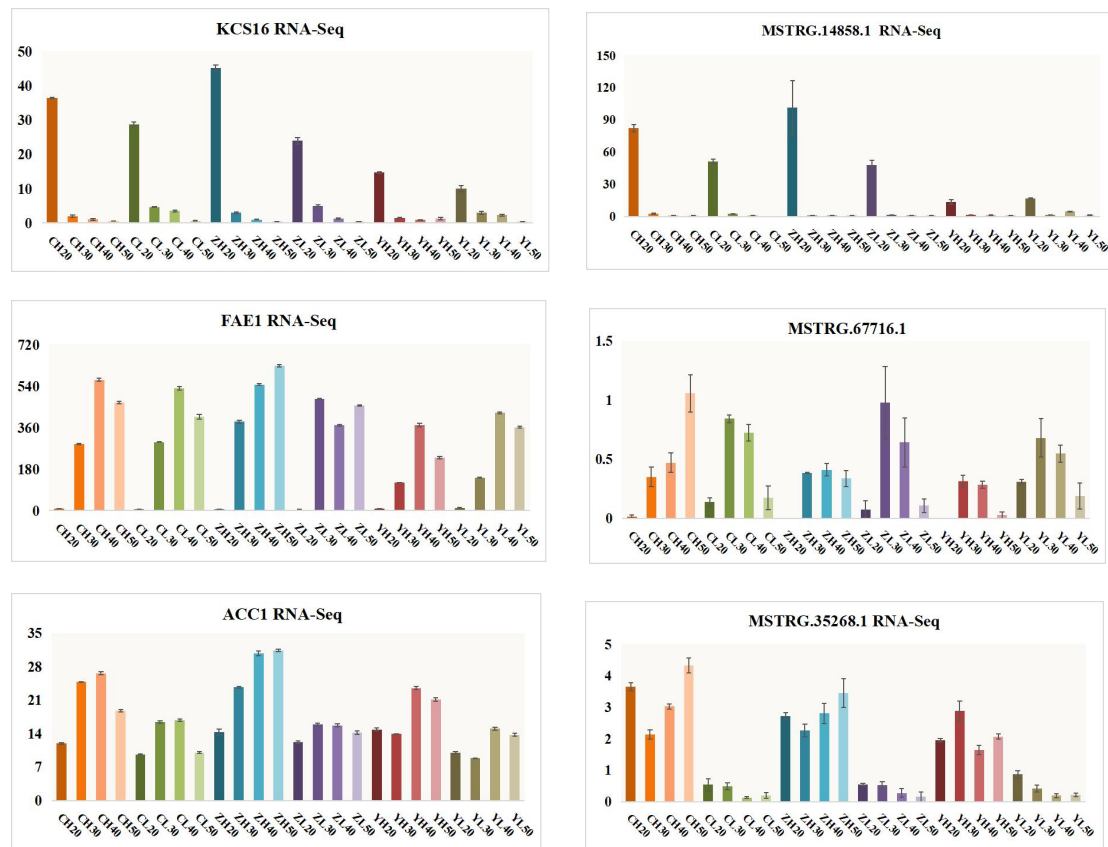

Supplementary Figure S7 The lncRNA and mRNA expression in the co-expression network

Supplement: s1 [file s1]
